# Supplementary material for: Comparative Genomic Analysis of the DUF34 Protein Family Suggests Role as a Metal Ion Chaperone or Insertase
Source: Preprints.org preprint supplement (doi:10.20944/preprints202107.0280.v1), 2021-07-13
Supplement: Supplementary file 1 [file Data Table 1.xlsx]

## Sheet: Content
Data Table 1		Reed et al., 2021
a	All search terms employed and accrued in the process of completing the comprehensive literature review and data capture for the DUF34 family.

## Sheet: a
DUF34 Family Search Term Catalog	Grayed rows are not in Table S4			General Family Terms	yqfO	NIF3L1	NIF3	Pfam	Superfamily(CDD)	CDD family	TIGR Family	COGs		(bacteria)	(eukaryota cog)	(archaea cog)	PANTHER	InterPro	(superfamily)	(bacterial)	(animal)
Term Total (left= w/ gen terms @top):	857	836	(if not unique to organism, not used in total counts)	ybgI	UPF0135	Ngg1-interacting factor 3	DUF34	pf01784	cl15371	PRK10799	TIGR00486	COG0327	COG3323	ENOG4105EGD	KOG4131	arCOG04454	PTHR13799	IPR002678	IPR036069	IPR017221	IPR017222
Oranism	Terms	Tax ID / Tree Node	symbol/name	ORF/Ordered Locus	UniProt Accession	UniProt ID	Gene ID	KEGG (genome)	PDB ID	RefSeq						EMBL	(Genomic DNA Translation)		Other synonyms/homonyms
Acanthamoeba castellanii str. Neff	8	1257118		ACA1_096770	L8GIV2	L8GIV2_ACACA	14913155	acan:ACA1_096770		XP_004335018.1﻿	XM_004334970.1					KB008103	ELR13005.1
Acanthamoeba polyphaga mimivirus (APMV)	10	212035	Uncharacterized protein R836	MIMI_R836	Q5UQI9	YR836_MIMIV	9925499	vg:9925499		YP_003987368.1﻿	NC_014649.1					AY653733	AAV51094.1
Acidaminococcus fermentans	6	591001	Uncharacterized protein	Acfer_0814	D2RJF0	D2RJF0_ACIFV		afn:Acfer_0814								CP001859	ADB47202.1
Acinetobacter baumannii	8	575584	Dinuclear metal center protein, YbgI family	HMPREF0010_02337	D0CC57	D0CC57_ACIB2				WP_001284931.1﻿	NZ_MJHA01000005.1					GG704575	EEX03295.1		PRK_00227
Actinomyces radicidentis	8	111015		AXF14_09895	A0A0X8JFD6	A0A0X8JFD6_ACTRD		ard:AXF14_09895		WP_067942901.1﻿	NZ_CP014228.1					CP014228	AMD87835.1
Acyrthosiphon pisum	6	7029	Uncharacterized protein		J9JXV7	J9JXV7_ACYPI	100166251			XP_003247907.1﻿	XM_003247859.3					ABLF02021258
Akkermansia muciniphila	9	349741	Uncharacterized protein	Amuc_0007	B2UL65	B2UL65_AKKM8	34175207	amu:Amuc_0007		WP_012419069.1﻿	NC_010655.1					CP001071	ACD03854.1
Alligator mississippiensis	5	8496	NIF3L1	Y1Q_0008769	A0A151NAT6	A0A151NAT6_ALLMI										AKHW03003682	KYO33615.1
Allomyces macrogynus ATCC 38327	5	578462	YbgI/family dinuclear metal center protein	AMAG_09094	A0A0L0SNH1	A0A0L0SNH1_ALLM3										GG745343	KNE64037.1
Amphimedon queenslandica	6	400682	Uncharacterized protein		A0A1X7V159	A0A1X7V159_AMPQE	100633892	aqu:100633892		XP_003386081.2﻿	XM_003386033.3
Anolis carolinensis	2	28377	NIF3L1		G1KTG6	G1KTG6_ANOCA													NGG1 interacting factor 3 like 1
Anopheles gambiae	10	7165	AGAP012228-PA	AgaP_AGAP012228	Q7Q029	Q7Q029_ANOGA	1280465	aga:AgaP_AGAP012228		XP_320310.3﻿	XM_320310.4					AAAB01008986	EAA00104.3		AgaP_AGAP012228
Archaeoglobus fulgidus	9	224325	GTP cyclohydrolase 1 type 2 homolog	AF_1777	O28497	GCH1L_ARCFU	24795520	afu:AF_1777		WP_010879273.1﻿	NC_000917.1					AE000782	AAB89474.1
Arthrobotrys oligospora	8	756982	Uncharacterized protein	AOL_s00054g174	G1X5N0	G1X5N0_ARTOA	22890687			XP_011119792.1﻿	XM_011121490.1					ADOT01000084	EGX51475.1
Aspergillus fumigatus	9	330879	NGG1 interacting factor Nif3, putative	AFUA_6G12480	Q4WLS6	Q4WLS6_ASPFU	3508433	afm:AFUA_6G12480		XP_751126.1﻿	XM_746033.1					AAHF01000006	EAL89088.1
Aspergillus niger	6	425011	Aspergillus niger contig An06c0090, genomic contig	An06g01640	A2QLL2	A2QLL2_ASPNC										AM270115	CAK48007.1
Astyanax mexicanus	2	7994	NIF3 NGG1 interacting factor 3-like 1 (S. cerevisiae)		W5LNS9	W5LNS9_ASTMX
Aureobasidium subglaciale	8	1043005	Uncharacterized protein	AUEXF2481DRAFT_1300	A0A074Z0B8	A0A074Z0B8_AURSE	25362013			XP_013347928.1﻿	XM_013492474.1					KL584750	KEQ99822.1
Bacillus anthracis str. Ames	14	1392	Uncharacterized protein	BA_5027	A0A4Y1WAE8	A0A4Y1WAE8_BACAN	1084290			NP_847220.1﻿	NC_003997.3	WP_001111102.1﻿	NZ_QPKQ01000004.1			AE016879, AP014833	AAP28706.1, BAR74353.1		BA4512, BASH2_00946
Bacillus cereus	13	226900	GTP cyclohydrolase 1 type 2 homolog	BC_4286	Q818H0	Q818H0_BACCR	1206631	bce:BC4286	2GX8	NP_833998.1﻿	NC_004722.1	WP_000036241.1﻿	NZ_CP034551.1			AE016877	AAP11199.1		YqfO, BC4286
Bacillus subtilis	14	224308	yqfO	BSU25170	P54472	GCH1L_BACSU	937901	bsu:BSU25170		NP_390396.1﻿	NC_000964.3	WP_004399125.1﻿	NZ_JNCM01000036.1			D84432, AL009126	BAA12492.1, CAB14447.1		BSU_25170, GTP cyclohydrolase 1 type 2 homolog
Bacteroides fragilis S23L24	7	1339329	ybgI/M139_2446		A0A017NA61	A0A017NA61_BACFG				WP_032563014.1	NZ_JHEF01000027.1					EYA66239.1	JHEF01000027
Batrachochytrium dendrobatidis	5	403673		BDEG_26653	A0A177WV10	A0A177WV10_BATDL										DS022309	OAJ43281.1
Beauveria bassiana	5	1245745	BBAD15_g3979		A0A0A2VS40	A0A0A2VS40_BEABA										ANFO01000291	KGQ10686.1
Bifidobacterium longum NCC2705	10	206672	BL0984		Q8G5M5	Q8G5M5_BIFLO		blo:BL0984		NP_696156.1﻿	NC_004307.2	WP_011068235.1	NC_004307.2			AE014295	AAN24792.1
Blastocystis hominis	8	12968		GSBLH_T00006063001	D8LW09	D8LW09_BLAHO	24922188			XP_012894046.1﻿	XM_013038592.1					FN668638	CBK19998.2
Bodo saltans	5	75058		BSAL_48245	A0A0S4JZ92	A0A0S4JZ92_BODSA										CYKH01002251	CUG94452.1
Bombyx mori	13	7091	BmNIF3l		Q09GP9	Q09GP9_BOMMO	767622	bmor:767622		NP_001091745.1	NM_001098275.1	XP_012544674.1﻿	XM_012689220.1			BABH01030956	BABH01030957	DQ904010	ABI73988.1
Bordetella pertussis	11	257313		BP0279	Q7W078	Q7W078_BORPE	50430505	bpe:BP0279		NP_879159.1	NC_002929.2	WP_010927226.1	NZ_CP039022.1			BX640411	CAE40658.1
Borrelia burgdorferi	12	224326	bb0468	BB_0468	O51424	GCH1L_BORBU	46847713	bbu:BB_0468		NP_212602.1	NC_001318.1	WP_002656266.1	NC_001318.1			AE000783	AAC66826.1
Bos taurus	10	9913	NIF3L1		Q05B89	NIF3L_BOVIN	509473	bta:509473		NP_001073718.1	NM_001080249.2	XP_005202674.1	XM_005202617.3			BC122596	AAI22597.1
Branchiostoma floridae	9	7739		BRAFLDRAFT_87445	C3YCU2	C3YCU2_BRAFL	7243253	bfo:BRAFLDRAFT_87445		XP_002605883.1	XM_002605837.1					GG666502	EEN61893.1
Buchnera aphidicola subsp. Acyrthosiphon pisum	10	107806	ybgI	BU301	P57387	GCH1L_BUCAI		buc:BU301		NP_240124.1	NC_002528.1	WP_009874254.1	NC_002528.1			BA000003	BAB13010.1
Burkholderia thailandensis	6	271848	BTH_I2978		Q2SUB7	Q2SUB7_BURTA		bte:BTH_I2978								CP000086	ABC37517.1
Caldilinea aerophila	8	926550		CLDAP_28700	I0I6M2	I0I6M2_CALAS		cap:CLDAP_28700		WP_014434137.1	NC_017079.1					AP012337	BAM00910.1
Calocera viscosa	5	1330018		CALVIDRAFT_539443	A0A167JYE6	A0A167JYE6_CALVF										KV417297	KZO94069.1
Campylobacter jejuni	12	192222	Cj_0705	Cj0705	Q9PPK2	GCH1L_CAMJE	905024	cje:Cj0705		WP_002852315.1﻿	NC_002163.1	YP_002344123.1	NC_002163.1			AL111168	CAL34842.1
Candida albicans	5	294748		CAWG_03228	C4YGP7	C4YGP7_CANAW										CH672349	EEQ44929.1
Candidatus Kinetoplastibacterium galatii TCC219	6	1208921		ST1E_0242	M1MA08	M1MA08_9PROT		kga:ST1E_0242								CP003806	AGF48740.1
Candidatus Thorarchaeota archaeon SMTZ1-45	5	1706444		AM325_02140	A0A135VH87	A0A135VH87_9ARCH										LRSL01000081	KXH71963.1
Canis lupus familiaris	14	9615	NIF3L1		E2RQI7	E2RQI7_CANLF	607446	cfa:607446		XP_005640576.1	XM_005640519.2	XP_005640577.1	XM_005640520.2	XP_013966411.1	XM_014110936.1, XP_849215.1﻿, XM_844122.4	AAEX03018012	AAEX03018013
Capsaspora owczarzaki	8	595528		CAOG_005867	A0A0D2WU71	A0A0D2WU71_CAPO3	14896676			XP_004345457.1﻿	XM_004345407.2					KE346369	KJE95413.1
Chelonia mydas	5	8469		UY3_18578	M7B7X3	M7B7X3_CHEMY										KB601989	EMP24342.1
Chlamydia pneumoniae	21	83558	CPn0137	CPn_0137	Q9Z946	GCH1L_CHLPN	45050182	cpa:CP_0635, cpj:ybgI, cpn:CPn0137, cpt:CpB0138		NP_224345.1﻿	NC_000922.1	WP_010882787.1﻿	NZ_LN847257.1			AE001363	AAD18290.1	AE002161	AAF38450.1	BA000008	BAA98347.1	AE009440	AAP98071.1
Chlamydia trachomatis D/UW-3/CX	12	272561	CT108	CT_108	O84110	GCH1L_CHLTR	884109	ctr:CT_108		NP_219611.1﻿	NC_000117.1	WP_009871455.1﻿	NC_000117.1			AE001273	AAC67699.1
Chromohalobacter salexigens	8	290398		Csal_2210	Q1QVE7	Q1QVE7_CHRSD		csa:Csal_2210		WP_011507507.1﻿	NC_007963.1					CP000285	ABE59561.1
Chroococcidiopsis thermalis PCC 7203	8	251229		Chro_5581	K9U8J0	K9U8J0_CHRTP		cthe:Chro_5581		WP_015157475.1﻿	NC_019695.1					CP003597	AFY90938.1
Chrysochromulina sp. CCMP291	5	1460289		Ctob_009256	A0A0M0JAW7	A0A0M0JAW7_9EUKA										JWZX01003187	KOO23482.1
Ciona intestinalis	9	7719	F6UUV5, F6UUV5_CIOIN	LOC100186638	A0A1W2WJH7		100186638			XP_004225511.1	NC_020166.2	XM_004225463.4				EAAA01000117
Clostridium acetobutylicum	11	272562		CA_C1303	Q97JI0	GCH1L_CLOAB	44997809	cac:CA_C1303		NP_347934.1﻿	NC_003030.1	WP_010964615.1﻿	NC_003030.1			AE001437	AAK79274.1
Clostridium botulinum A	14	441771	CBO_2935	CBO2935	A5I615	A5I615_CLOBH		cbh:CLC_2830, cbo:CBO2935		WP_012047988.1﻿	NC_009698.1	YP_001255427.1﻿	NC_009495.1	YP_001388664.1﻿	NC_009698.1	AM412317	CAL84497.1
Clostridium difficile	10	272563		CD630_06720	Q189L6	Q189L6_CLOD6		cdf:CD630_06720		WP_011860910.1﻿	NC_009089.1	YP_001087148.1﻿	NC_009089.1			AM180355	CAJ67505.1
Clostridium difficile str. R20291	6	645463		CDR20291_1306	C9YL54	C9YL54_CLODR		cdl:CDR20291_1306								FN545816	CBE03762.1
Conexibacter woesei	9	469383	Cwoe1390	Cwoe_1390	D3EYU5	D3EYU5_CONWI		cwo:Cwoe_1390		WP_012932870.1﻿	NC_013739.1					CP001854	ADB49819.1
Coprinopsis cinerea	10	240176	CC1G00726	CC1G_00726	A8N3H0	A8N3H0_COPC7	6005980	cci:CC1G_00726		XP_001829547.2﻿	XM_001829495.2					AACS02000001	EAU92507.2
Corynebacterium diphtheriae	10	257309	DIP_1680	DIP1680	Q6NG53	Q6NG53_CORDI	29421572	cdi:DIP1680		WP_010935247.1﻿	NC_002935.2					BX248358	CAE50209.1
Crassostrea gigas	7	29159	CGI10016084	CGI_10016084	K1RLN1	K1RLN1_CRAGI										AFTI01010282	JH817068	EKC35256.1
Cricetulus griseus (Chinese hamster)	11	10029		I79_014620	G3HUK8	G3HUK8_CRIGR	100758007	cge:100758007		XP_007611172.1﻿	XM_007612982.2	XP_007645770.1﻿	XM_007647580.2			JH000741	EGV99446.1
Cryptococcus neoformans var. neoformans serotype D	10	214684	CNH_02550	CNH02550	Q5KCX5	Q5KCX5_CRYNJ	3259311	cne:CNH02550		XP_572431.1﻿	XM_572431.1					AE017348	AAW45124.1
Danio rerio	3	7955	nif3l1		F1QAA0	F1QAA0_DANRE										AL929495
Daphnia pulex	6	6669		DAPPUDRAFT_43076	E9FYI0	E9FYI0_DAPPU		dpx:DAPPUDRAFT_43076								GL732527	EFX87532.1
Dechloromonas aromatica	9	159087	Daro3370	Daro_3370	Q47AN2	Q47AN2_DECAR		dar:Daro_3370		WP_011289095.1﻿	NC_007298.1					CP000089	AAZ48099.1
Defluviitoga tunisiensis	6	1006576		DTL3_0077	A0A0C7NHG1	A0A0C7NHG1_DEFTU		dtn:DTL3_0077								LN824141	CEP77411.1
Deinococcus radiodurans	9	243230	DR0110	DR_0110	Q9RY41	GCH1L_DEIRA		dra:DR_0110		NP_293836.1﻿	NC_001263.1					AE000513	AAF09697.1
Desulfovibrio desulfuricans G20	9	207559	Dde1729	Dde_1729	Q310X0	Q310X0_DESAG		dde:Dde_1729		WP_011367667.1﻿	NC_007519.1					CP000112	ABB38526.1
Desulfurobacterium thermolithotrophum	9	868864	Dester1420	Dester_1420	F0S1X0	F0S1X0_DESTD		dte:Dester_1420		WP_013639000.1﻿	NC_015185.1					CP002543	ADY74051.1
Dichelobacter nodosus	9	246195	DNO0852	DNO_0852	A5EYD5	A5EYD5_DICNV		dno:DNO_0852		WP_012031173.1﻿	NC_009446.1					CP000513	ABQ13893.1
Dictyostelium discoideum	9	44689	nif3l1	DDB_G0270854	Q55E83	NIF3L_DICDI	8616840	ddi:DDB_G0270854		XP_645898.1﻿	XM_640806.1					AAFI02000005	EAL72777.1
Drosophila melanogaster	15	7227	Dmel_CG4278, DS02740.16, anon-35F/36A	CG4278	Q9NK57	NIF3L_DROME	34970	dme:Dmel_CG4278		NP_609790.1﻿	NM_135946.3					AE014134	AAF53525.2	AY069556	AAL39701.2	FBgn0014092
Echinococcus granulosus	5	6210	NIF3-like protein	EGR_02961	W6V706	W6V706_ECHGR										APAU02000014	EUB62209.1
Elusimicrobium minutum	8	445932		Emin_0233	B2KB36	B2KB36_ELUMP		emi:Emin_0233		WP_012414410.1﻿	NC_010644.1					CP001055	ACC97795.1
Emiliania huxleyi	9	2903		EMIHUDRAFT_229910	R1DEG7	R1DEG7_EMIHU	17278618	ehx:EMIHUDRAFT_229910		XP_005785776.1﻿	XM_005785719.1					KB864445	EOD33347.1
Encephalitozoon cuniculi	9	284813		ECU07_0100	Q8SV52	Q8SV52_ENCCU	859366	ecu:ECU07_0100		NP_585938.1﻿	NM_001041560.1					AL590447	CAD25542.1
Entamoeba histolytica	10	5759	EHI161860	EHI_161860	C4M6M9	C4M6M9_ENTHI	3403599	ehi:EHI_161860		XP_649305.1﻿	XM_644213.2					DS571304	EAL43916.1
Escherichia coli	18	83333	ybgI	b0710, JW0700	P0AFP6	GCH1L_ECOLI	49585537, 945824	ecj:JW0700, eco:b0710	1NMO, 1NMP	NP_415238.1﻿	NC_000913.3	WP_000798871.1﻿	NZ_STEB01000035.1			U00096	AAC73804.1	AP009048	BAA35374.1
Eutypa lata	8	1287681		UCREL1_10364	M7S957	M7S957_EUTLA		ela:UCREL1_10364		XP_007798206.1﻿	XM_007800015.1					KB707405	EMR62674.1
Exiguobacterium antacticum strain B7	8	1087448		Eab7_0807	K0ABC9	K0ABC9_EXIAB		ean:Eab7_0807		WP_014969818.1﻿	NC_018665.1					CP003063	AFS69951.1
Exophiala mesophila	8	212818		PV10_00026	A0A0D1ZNC5	A0A0D1ZNC5_EXOME	27317871			XP_016227696.1﻿	XM_016364047.1					KN847520	KIV96122.1
Fibrobacter succinogenes	10	59374		FSU_0039	C9RNB8	C9RNB8_FIBSS	34754026	fsc:FSU_0039, fsu:Fisuc_2787		WP_014544906.1﻿	NC_017448.1					CP002158	ADL26930.1
Fonticula alba	8	691883		H696_00077	A0A058ZG94	A0A058ZG94_FONAL	20524802			XP_009492183.1﻿	XM_009493908.1					KB932201	KCV72482.1
Frischella perrara	8	1267021		FPB0191_00850	A0A0A7S5W8	A0A0A7S5W8_FRIPE		fpp:FPB0191_00850		WP_039104278.1﻿	NZ_QGTI01000002.1					CP009056	AJA44676.1
Fusobacterium nucleatum subsp. nucleatum	10	190304	FN_1791	FN1791	Q8R6E6	Q8R6E6_FUSNN	992598	fnu:FN1791		NP_602591.1﻿	NC_003454.1					AE009951	AAL93890.1
Gallionella capsiferriformans	8	395494		Galf_0446	D9SC25	D9SC25_GALCS		gca:Galf_0446		WP_013292433.1﻿	NC_014394.1					CP002159	ADL54490.1
Gallus gallus	6	9031	NIF3L1		F1NDR9	F1NDR9_CHICK	424076			XP_421932.3﻿	XM_421932.5					AADN05000350
Gemmatimonas aurantiaca	9	379066	GAU0025	GAU_0025	C1A3J0	C1A3J0_GEMAT		gau:GAU_0025		WP_012681515.1﻿	NC_012489.1					AP009153	BAH37067.1
Geobacillus stearothermophilus T-6	5	1422	xynX		Q09LX2	Q09LX2_GEOSE										DQ868502	ABI49952.1
Geobacter sulfurreducens	11	243231	yqfO/GSU_3085	GSU3085	Q748C2	Q748C2_GEOSL		gsu:GSU3085		NP_954126.2﻿	NC_002939.5	WP_010943706.1﻿	NC_002939.5			AE017180	AAR36476.2
Gibberella zeae	8	229533		FG06319.1	I1RQH6	I1RQH6_GIBZE	23553454	fgr:FGSG_06319		XP_011324973.1﻿	XM_011326671.1					HG970334
Gonapodya prolifera JEL478	5	1344416		M427DRAFT_56278	A0A139AHU6	A0A139AHU6_GONPJ										KQ965758	KXS15983.1
Guillardia theta CCMP2712	9	905079		GUITHDRAFT_111577	L1J1Z6	L1J1Z6_GUITC	17298985	gtt:GUITHDRAFT_111577		XP_005829282.1﻿	XM_005829225.1					JH993017	EKX42302.1
Haemophilus ducreyi	10	233412	HD1471	HD_1471	Q7VLH4	Q7VLH4_HAEDU	24943665	hdu:HD_1471		WP_010945318.1﻿	NC_002940.2					AE017143	AAP96273.1
Haemophilus influenzae	11	71421	HI0105	HI_0105	Q57354	GCH1L_HAEIN		hin:HI0105		NP_438279.2﻿	NC_000907.1	WP_005649665.1﻿	NC_000907.1			L42023	AAC21783.1
Haloarcula marismortui	12	272569	nif3	rrnAC1923, E6P14_11805	Q5V108	Q5V108_HALMA	40152850	hma:rrnAC1923		WP_011223927.1﻿	NZ_CP039138.1					AY596297	AAV46795.1	CP039138	QCP91502.1
Halobacterium salinarum	9	64091		VNG_1766C	Q9HP80	GCH1L_HALSA	5953903	hal:VNG_1766C		WP_010903288.1﻿	NC_002607.1					AE004437	AAG19990.1
Haloferax volcanii	10	309800	HVO2298	HVO_2298	D4GWG2	D4GWG2_HALVD	8925368	hvo:HVO_2298		WP_004042190.1﻿	NZ_AOHU01000042.1					CP001956	ADE02470.1
Helicobacter pylori	12	85962	HP0959	HP_0959	O25613	GTPC1_HELPY		heo:C694_04940, hpy:HP0959		NP_207751.1﻿	NC_000915.1	WP_001229797.1﻿	NC_018939.1			AE000511	AAD08001.1
Helobdella robusta	10	6412		HELRODRAFT_105066	T1EDQ3	T1EDQ3_HELRO	20194705	hro:HELRODRAFT_105066		XP_009014825.1﻿	XM_009016577.1					AMQM01009311	KB096242	ESO07077.1
Hippea maritima	7	760142	Hipma1247	Hipma_1247	F2LX24	F2LX24_HIPMA		hmr:Hipma_1247								CP002606	AEA34208.1
Homo sapiens	45	9606	NIF3L1		Q9GZT8	NIF3L_HUMAN	60491	hsa:60491		NP_001129511.1﻿, NM_001136039.2, NP_001135827.1﻿, NM_001142355.1, NP_001135828.1﻿, NM_001142356.1, NP_068596.2﻿, NM_021824.3	XP_005246799.1﻿, XM_005246742.3, XP_011509884.1﻿, XM_011511582.1, XP_011509885.1﻿, XM_011511583.1, XP_011509886.1﻿, XM_011511584.1, XP_011509887.1﻿, XM_011511585.1, XP_016860119.1﻿, XM_017004630.1					AF283538, AAG44846.1, AB038949, BAB32499.1, AY251943, AAP84063.1, AF060513, AAG43131.1, AF182416, AAG14952.1	AK023378, BAB14551.1, AC005037, AAY14724.1, CH471063, EAW70224.1, BC007654, AAH07654.1	MDS015	My018	ALS2CR1
Hymenolepis microstoma	5	102285		HNAJ_LOCUS9570	A0A0R3TPY9	A0A0R3TPY9_RODNA										UZAE01012660	VDO06131.1
Idiosepius paradoxus	0		NIF3L1 homolog
Ixodes scapularis	10	6945		IscW_ISCW024180	B7PB02	B7PB02_IXOSC	8027209	isc:IscW_ISCW024180		XP_002407569.1﻿	XM_002407525.1					ABJB010608500	DS674167	EEC03774.1
Kosmotoga olearia	8	521045		Kole_0414	C5CDX0	C5CDX0_KOSOT		kol:Kole_0414		WP_012744926.1﻿	NC_012785.1					CP001634	ACR79139.1
Latimeria chalumnae	10	7897	NIF3L1		H3AR89	H3AR89_LATCH										AFYH01154971	AFYH01154972	AFYH01154973	AFYH01154974	AFYH01154975, AFYH01154976, AFYH01154977, AFYH01154978
Legionella pneumophila subsp. pneumophila (strain Philadelphia 1 / ATCC 33152 / DSM 7513)	11	272624	lpg_2515	lpg2515	Q5ZSK2	Q5ZSK2_LEGPH		lpn:lpg2515		WP_010948217.1﻿	NC_002942.5	YP_096522.1﻿	NC_002942.5			AE017354	AAU28575.1
Leishmania major	9	5664		LMJF_11_0130	Q4QH67	Q4QH67_LEIMA	5649755	lma:LMJF_11_0130		XP_001681481.1﻿	XM_001681429.1					FR796407	CAJ02381.1
Lokiarchaeum sp. GC14_75	6	1538547		Lokiarch_52630	A0A0F8V6Y5	A0A0F8V6Y5_LOKSG		loki:Lokiarch_52630								JYIM01000484	KKK40313.1
Lottia gigantea	9	225164		LOTGIDRAFT_142416	V4A440	V4A440_LOTGI	20234574	lgi:LOTGIDRAFT_142416		XP_009050627.1﻿	XM_009052379.1					KB201206	ESO98683.1
Macaca fascicularis	14	9541	NIF3L1	EGM_04200	A0A2K5W797	A0A2K5W797_MACFA	102139637			XP_005573949.1﻿, XM_005573892.2, XP_005573950.1﻿, XM_005573893.2	XP_015287608.1﻿, XM_015432122.1, XP_015287609.1﻿, XM_015432123.1					CM001287	EHH55069.1
Macaca mulatta	15	9544	NIF3L1	EGK_04676	G7N8M4	G7N8M4_MACMU	700572	mcc:700572		NP_001248662.1﻿, NM_001261733.1, XP_014966100.1﻿, XM_015110614.1	XP_014966101.1﻿, XM_015110615.1, XP_014966102.1﻿, XM_015110616.1					CM001264	EHH21574.1
Magnetococcus marinus	8	156889		Mmc1_0023	A0L3K9	A0L3K9_MAGMM		mgm:Mmc1_0023		WP_011711726.1﻿	NC_008576.1					CP000471	ABK42552.1
Malassezia globosa	10	425265	MGL0975	MGL_0975	A8PVX1	A8PVX1_MALGO	5856012	mgl:MGL_0975		XP_001731707.1﻿	XM_001731655.1					AAYY01000003	EDP44493.1
Methanocaldococcus jannaschii	19	243232	MJ_0927, HcgD	MJ0927	Q58337	GCH1L_METJA	1451816	mja:MJ_0927	3WSD, 3WSE, 3WSF, 3WSG, 3WSH, 3WSI, 4IWG, 4IWM	WP_064496667.1﻿	NC_000909.1					L77117	AAB98929.1
Methanocella arvoryzae	9	351160		RCIX1843	Q0W3L4	Q0W3L4_METAR	5144390	rci:RCIX1843		WP_012035540.1﻿	NC_009464.1					AM114193	CAJ37029.1
Methanococcus maripaludis S2/LL	10	267377	Mmp_0053	MMP0053	Q6M164	Q6M164_METMP	41278462	mmp:MMP0053		WP_011169997.1﻿	NC_005791.1					BX950229	CAF29609.1
Methanopyrus kandleri	7	190192	MK_1192	MK1192	Q8TW44	Q8TW44_METKA		mka:MK1192								AE009439	AAM02405.1
Methanosarcina acetivorans	10	188937	MA2828	MA_2828	Q8TM42	Q8TM42_METAC	1474724	mac:MA_2828		WP_011022780.1﻿	NC_003552.1					AE010299	AAM06207.1
Methanospirillum hungatei JF-1	10	323259	Mhun0228	Mhun_0228	Q2FPY1	Q2FPY1_METHJ	3924405	mhu:Mhun_0228		WP_011447295.1﻿	NC_007796.1					CP000254	ABD40000.1
Methanothermobacter thermautotrophicus	10	187420	MTH1146	MTH_1146	O27214	GCH1L_METTH	1471554	mth:MTH_1146		WP_010876770.1﻿	NC_000916.1					AE000666	AAB85635.1
Methylobacillus flagellatus	9	265072	Mfla0262	Mfla_0262	Q1H4Q4	Q1H4Q4_METFK		mfa:Mfla_0262		WP_011478630.1﻿	NC_007947.1					CP000284	ABE48533.1
Methylococcus capsulatus	9	243233	MCA_1131	MCA1131	Q609U6	Q609U6_METCA		mca:MCA1131		WP_010960425.1﻿	NC_002977.6					AE017282	AAU92840.1
Microbotryum lychnidis-dioicae	7	683840	MVLG05355	MVLG_05355	U5HE01	U5HE01_USTV1										AEIJ01000557	GL541713	KDE04192.1
Mixia osmundae	10	764103	Mo_05639	Mo05639, E5Q_05639	G7E7Z1	G7E7Z1_MIXOS	26262954			XP_014567110.1﻿	XM_014711624.1					BABT02000165	GAA98951.1
Monodelphis domestica	8	13616	NIF3L1		F7FUK4	F7FUK4_MONDO	100016668	mdo:100016668		XP_007501657.1﻿, XM_007501595.1	XP_007501658.1﻿, XM_007501596.2
Moranella endobia	2	1234603	MPC_396, AGJ61403.1
Mus musculus	20	10090	Nif3l1		Q9EQ80	NIF3L_MOUSE	65102	mmu:65102		NP_075364.2﻿, NM_022988.3	XP_006496249.1﻿, XM_006496186.1					AF284439, AAG45961.1	AK011670, BAB27769.1	AK154815, BAE32848.1	AK158616, BAE34583.1	CH466548, EDL00082.1, BC065163, AAH65163.1
Mycobacterium avium 104	9	243243	MAV2209	MAV_2209	A0A0H2ZW37	A0A0H2ZW37_MYCA1		mav:MAV_2209		WP_009976462.1﻿	NC_008595.1					CP000479	ABK66767.1
Mycobacterium avium subsp. paratuberculosis	10	262316	MAP1982c	MAP_1982c	Q73YH4	Q73YH4_MYCPA	2721602	mpa:MAP_1982c		WP_003878182.1﻿	NC_002944.2					AE016958	AAS04299.1
Mycobacterium leprae str. Br4923	9	561304	MLBr_01639	MLBr01639	A0A0H3MR33	A0A0H3MR33_MYCLB		mlb:MLBr01639		WP_010908450.1﻿	NC_011896.1					FM211192	CAR71734.1
Mycobacterium marinum	9	216594	MMAR3306	MMAR_3306	B2HHN4	B2HHN4_MYCMM		mmi:MMAR_3306		WP_012394959.1﻿	NC_010612.1					CP000854	ACC41732.1
Mycobacterium smegmatis	11	246196	MSMEG4307	MSMEG_4307	A0R096	A0R096_MYCS2		msm:MSMEG_4307		WP_011729722.1﻿, NZ_SIJM01000003.1	YP_888584.1﻿, NC_008596.1					CP000480	ABK73705.1
Mycobacterium tuberculosis	14	83332		Rv2230c, MTCY427.11c	P9WFM1	GCH1L_MYCTU	23491572, 888231	mtu:Rv2230c, mtv:RVBD_2230c		NP_216746.1﻿, NC_000962.3	WP_003411502.1﻿, NZ_NVQJ01000008.1					AL123456	CCP45008.1
Nasonia vitripennis	2	7425			K7ITJ5	K7ITJ5_NASVI
Natranaerobius thermophilus	9	457570	Nther1217	Nther_1217	B2A1Z5	B2A1Z5_NATTJ		nth:Nther_1217		WP_012447675.1﻿	NC_010718.1					CP001034	ACB84800.1
Natrialba magadii	7	547559	Nmag1203	Nmag_1203	D3SS59	D3SS59_NATMM		nmg:Nmag_1203								CP001932	ADD04785.1
Neisseria gonorrhoeae	11	242231	NGO2028	NGO_2028	Q5F5A1	Q5F5A1_NEIG1		ngo:NGO2028		WP_010951384.1﻿, NC_002946.2	YP_209048.1﻿, NC_002946.2					AE004969	AAW90636.1
Neisseria meningitidis	11	122586	NMB_2054	NMB2054	Q9JXG9	GCH1L_NEIMB		nme:NMB2054		NP_275044.1﻿, NC_003112.2	WP_002225699.1﻿, NC_003112.2					AE002098	AAF42374.1
Nematostella vectensis	9	45351		v1g187611	A7SAJ3	A7SAJ3_NEMVE	5510931	nve:5510931		XP_001631351.1﻿	XM_001631301.1					DS469609	EDO39288.1
Neosartorya fumigata	9	330879		AFUA_6G12480	Q4WLS6	Q4WLS6_ASPFU	3508433	afm:AFUA_6G12480		XP_751126.1﻿	XM_746033.1					AAHF01000006	EAL89088.1
Neurospora crassa OR74A	10	367110	NCU_06108	NCU06108	Q7S5H9	Q7S5H9_NEUCR	3876108	ncr:NCU06108		XP_959970.2﻿	XM_954877.3					CM002242	EAA30734.2
Nitrosomonas europaea	9	228410	NE_1509	NE1509	Q82UH6	Q82UH6_NITEU		neu:NE1509		WP_011112077.1﻿	NC_004757.1					AL954747	CAD85420.1
Nosema ceranae (strain BRL01)	9	578460	NCER100701	NCER_100701	C4V892	C4V892_NOSCE		nce:NCER_100701		XP_002996241.1﻿	XM_002996195.1					ACOL01000044	EEQ82570.1
Nostoc sp.	9	103690	alr_3216	alr3216	Q8YS75	GCH1L_NOSS1		ana:alr3216		WP_010997367.1﻿	NZ_RSCN01000001.1					BA000019	BAB74915.1
Oikopleura dioica	5	34765		GSOID_T00006592001	E4XBT5	E4XBT5_OIKDI										FN653034	CBY09060.1
Opitutus terrae	9	452637	Oter3636	Oter_3636	B1ZWG1	B1ZWG1_OPITP		ote:Oter_3636		WP_012376442.1﻿	NC_010571.1					CP001032	ACB76913.1
Oreochromis niloticus	3	8128	nif3l1		I3JZV4	I3JZV4_ORENI		onl:100704207
Pan troglodytes	21	9598	NIF3L1		H2R3D2	H2R3D2_PANTR	459867	ptr:459867		XP_001171107.1﻿, XM_001171107.4	XP_009442233.1﻿, XM_009443958.1	XP_016804996.1﻿, XM_016949507.1	XP_016804997.1﻿, XM_016949508.1			AACZ04058663	GABC01005872, JAA05466.1	GABF01008372, JAA13773.1	GABD01001413, JAA31687.1	GABE01009560, JAA35179.1
Pediculus humanus subsp. corporis	10	121224		Phum_PHUM446240	E0VU56	E0VU56_PEDHC	8231189	phu:Phum_PHUM446240		XP_002429650.1﻿	XM_002429605.1					AAZO01005449	DS235780	EEB16912.1
Perkinsela sp. CCAP 1560/4	5	1314962		XU18_4113	A0A0L1KLF4	A0A0L1KLF4_9EUGL										LFNC01000327	KNH04701.1
Phaeosphaeria nodorum	9	321614		SNOG_03149	Q0UYL5	Q0UYL5_PHANO	5970018	pno:SNOG_03149		XP_001793730.1﻿	XM_001793678.1					CH445328	EAT89880.2
Photorhabdus luminescens	10	243265	Plu_1424	plu1424	Q7N6W3	Q7N6W3_PHOLL	48847712	plu:plu1424		WP_011145729.1﻿	NC_005126.1					BX571863	CAE13717.1
Pirellula staleyi	9	530564	Psta0842	Psta_0842	D2R6E9	D2R6E9_PIRSD		psl:Psta_0842		WP_012909792.1﻿	NC_013720.1					CP001848	ADB15527.1
Pneumocystis carinii (strain B80)	8	1408658		T552_02118	A0A0W4ZH23	A0A0W4ZH23_PNEC8	28936876			XP_018225560.1﻿	XM_018370673.1					LFVZ01000009	KTW27678.1
Porphyromonas gingivalis	9	242619	PG2043	PG_2043	Q7MTC6	Q7MTC6_PORGI		pgi:PG_2043		WP_005874425.1﻿	NC_002950.2					AE015924	AAQ67008.1
Pseudomonas aeruginosa	13	208964	PA_4445	PA4445	Q9HVX2	GCH1L_PSEAE	45712416, 880975	pae:PA4445		NP_253135.1﻿, NC_002516.2	WP_003094318.1﻿, NZ_QZGE01000004.1					AE004091	AAG07833.1
Pseudomonas gingeri	7	707248		CCU68_15925	A0A2K1FG66	A0A2K1FG66_9PSED				WP_017126513.1﻿	NZ_POWE01000091.1					POWE01000091	PNQ91521.1
Pseudomonas putida	11	160488	PP1302	PP_1302	Q88NB0	Q88NB0_PSEPK		ppu:PP_1302		NP_743462.1﻿, NC_002947.4	WP_010952428.1﻿, NC_002947.4					AE015451	AAN66926.1
Pseudomonas syringae pv. coryli	7	317659		ALO75_00638	A0A0P9MUA9	A0A0P9MUA9_9PSED				WP_003364071.1﻿	NZ_LJQC01001046.1					LJQC01001046	KPW88249.1
Pseudomonas syringae pv. syringae	11	205918	Psyr4129	Psyr_4129	Q4ZNW3	Q4ZNW3_PSEU2		psb:Psyr_4129		WP_011268856.1﻿, NC_007005.1	YP_237197.1﻿, NC_007005.1					CP000075	AAY39159.1
Puccinia graminis f. sp. tritici	10	418459	PGTG04475	PGTG_04475	E3K2F0	E3K2F0_PUCGT	10536200	pgr:PGTG_04475		XP_003322938.1﻿	XM_003322890.2					DS178270	EFP78519.1
Pyrococcus abyssi	12	272844	PYRAB_14240	PYRAB14240, PAB1433	Q9UYT3	GCH1L_PYRAB	1496815	pab:PAB1433		WP_010868539.1﻿	NC_000868.1					AJ248287	CAB50329.1	HE613800	CCE70869.1
Ralstonia solanacearum	12	267608	RSc_2931, RS_00159	RSc2931, RS00159	Q8XVA0	GCH1L_RALSO	1221785	rso:RSc2931		WP_011002836.1﻿	NC_003295.1					AL646052	CAD16638.1
Rattus norvegicus	9	10116	Nif3l1		Q4V7D6	NIF3L_RAT	301431			XP_006245023.1﻿, XM_006244961.3	XP_006245024.1﻿, XM_006244962.3					BC097992	AAH97992.1
Rhinocladiella mackenziei CBS 650.93	8	1442369	Z518_09833		A0A0D2GR18	A0A0D2GR18_9EURO	25297904			XP_013267904.1﻿	XM_013412450.1					KN847482	KIX00768.1
Rhizophagus irregularis DAOM 197198w	9	1432141	RirG112510, Nif3p	RirG_112510	A0A015KJ89	A0A015KJ89_RHIIW										JEMT01017645	EXX67629.1	JEMT01017645	EXX67630.1
Rhizopus microsporus	3	58291		RMCBS344292_18563	A0A0A1NYT8											CEJ04608.1
Rozella allomycis CSF55	5	988480		O9G_001534	A0A075B1Y9	A0A075B1Y9_ROZAC										KE560523	EPZ36550.1
Saccharomyces cerevisiae	13	559292	NIF3	YGL221C	P53081	NIF3_YEAST	852651	sce:YGL221C		NP_011294.1﻿	NM_001181086.1					Z72743	CAA96937.1	AY693216	AAT93235.1	BK006941, DAA07898.1
Saccharopolyspora erythraea	12	405948	SACE1582	SACE_1582, A8924_1982	A4FA29	A4FA29_SACEN		sen:SACE_1582		WP_011873404.1﻿	NZ_PDBV01000001.1					AM420293	CAM00904.1	PDBV01000001	PFG94689.1
Saitoella complicata NRRL Y-17804	8	698492		G7K_2388-t1	A0A0E9NEH0	A0A0E9NEH0_SAICN	30188833			XP_019022544.1﻿	XM_019171986.1					BACD03000013	GAO48208.1
Salmonella typhimurium	12	99287	STM_0711	STM0711	P67270	GCH1L_SALTY	1252231	stm:STM0711		NP_459696.1﻿	NC_003197.2	WP_000798844.1﻿	NC_003197.2			AE006468	AAL19655.1
Schistosoma mansoni	10	6183	Smp051390	Smp_051390	G4LY02	G4LY02_SCHMA	8352238	smm:Smp_051390		XP_018646140.1﻿	XM_018790627.1					CABG01000042	CCD59787.1
Schistosoma mekongi	1		comp3044_seq3
Schizosaccharomyces pombe	9	284812		SPCC126.12	O94404	NIF3_SCHPO	2539063	spo:SPCC126.12		NP_588455.1﻿	NM_001023446.2					CU329672	CAA22481.1
Scleropages formosus	5	113540		Z043_103118	A0A0P7XQ28	A0A0P7XQ28_SCLFO										JARO02000771	KPP77453.1
Sclerotinia borealis F-4128	6	1432307	SBOR2817	SBOR_2817	W9CLY3	W9CLY3_SCLBF										AYSA01000123	ESZ96816.1
Shewanella oneidensis	11	211586	SO2621	SO_2621	Q8EDX0	Q8EDX0_SHEON		son:SO_2621		NP_718206.1﻿	NC_004347.2	WP_011072570.1﻿	NC_004347.2			AE014299	AAN55650.1
Sphaerobacter thermophilus	10	479434	Sthe0840	Sthe_0840	D1C210	D1C210_SPHTD		sti:Sthe_0840	3RXY	WP_012871324.1﻿	NC_013523.1					CP001823	ACZ38277.1
Spizellomyces punctatus DAOM BR117	9	645134	SPPG01475	SPPG_01475	A0A0L0HSC6	A0A0L0HSC6_SPIPD	27685135			XP_016612067.1﻿	XM_016749793.1					KQ257451	KND04028.1
Staphylococcus aureus	11	158879	SA_1388	SA1388	P67273	GCH1L_STAAN		sau:SA1388	3LNL, 2NYD	WP_000683940.1﻿	NC_002745.2					BA000018	BAB42651.1
Streptococcus pneumoniae	10	170187	SP1609	SP_1609	Q97PK0	GCH1L_STRPN		spn:SP_1609	2FYW	WP_000881169.1﻿	NZ_AKVY01000001.1					AE005672	AAK75693.1
Streptococcus pyogenes serotype M1	13	301447	Spy0931, M5005_Spy0732	SPy_0931	P67274	GCH1L_STRP1		spy:SPy_0931, spz:M5005_Spy0732		NP_269125.1﻿	NC_002737.2					AE004092	AAK33846.1	CP000017	AAZ51350.1
Streptococcus thermophilus	10	264199	stu_1248	stu1248	Q5M3W1	Q5M3W1_STRT2	52200200	stl:stu1248		WP_011226154.1﻿	NC_006448.1					CP000023	AAV60882.1
Streptomyces coelicolor	13	100226	SCO_2301	SCO2301, SCC30.09c	Q9L012	GCH1L_STRCO	1097735	sco:SCO2301		NP_626549.1﻿	NC_003888.3	WP_011028263.1﻿	NZ_VNID01000001.1			AL939112	CAB88179.1
Streptomyces sp. SN-1061M	1		“Orf11”
Strigamia maritima	3	126957			T1J2P1	T1J2P1_STRMM										JH431806
Strongylocentrotus purpuratus	7	7668			W4XLT5	W4XLT5_STRPU	589089	spu:589089		XP_793836.2﻿	XM_788743.4					AAGJ04084607
Sulfobacillus thermosulfidooxidans	7	28034	STCUT_1350, STCUT1350	C7B47_12350	A0A2T2WT66	A0A2T2WT66_SULTH										PXYX01000031	PSR25393.1
Sulfuricella denitrificans skB26	8	1163617		SCD_n00600	S6B174	S6B174_SULDS		sdr:SCD_n00600		WP_009206604.1﻿	NC_022357.1					AP013066	BAN34447.1
Syntrophobacter fumaroxidans	9	335543	Sfum1210	Sfum_1210	A0LHK1	A0LHK1_SYNFM		sfu:Sfum_1210		WP_011698074.1﻿	NC_008554.1					CP000478	ABK16903.1
Taphrina deformans	6	1097556	TAPDE004720	TAPDE_004720	R4XEK8	R4XEK8_TAPDE										CAHR02000218	CCG84282.1
Terrimicrobium sacchariphilum	8	690879	TSACC21946	TSACC_21946	A0A146G723	A0A146G723_TERSA				WP_075079255.1﻿	NZ_BDCO01000002.1					BDCO01000002	GAT33529.1
Tetranychus urticae	9	32264			T1KTG7	T1KTG7_TETUR	107366958	tut:107366958		XP_015790090.1﻿	XM_015934604.1	XP_015790091.1﻿	XM_015934605.1			CAEY01000525
Thermococcus kodakarensis	10	69014	TK_1572	TK1572	Q5JIP5	Q5JIP5_THEKO	3234810	tko:TK1572		WP_011250523.1﻿	NC_006624.1					AP006878	BAD85761.1
Thermodesulfatator indicus	7	667014	Thein0033	Thein_0033	F8A8B4	F8A8B4_THEID		tid:Thein_0033								CP002683	AEH43918.1
Thermovibrio ammonificans	9	648996	Theam0231	Theam_0231	E8T3Z4	E8T3Z4_THEA1		tam:Theam_0231		WP_013536990.1﻿	NC_014926.1					CP002444	ADU96204.1
Thermus thermophilus	13	300852	TTHA_1606	TTHA1606	Q5SHX4	Q5SHX4_THET8	3170045	ttj:TTHA1606	2YYB	WP_011228802.1﻿	NC_006461.1	YP_144872.1﻿	NC_006461.1			AP008226	BAD71429.1
Thiomicrospira crunogena	9	317025	Tcr0990	Tcr_0990	Q31GY8	Q31GY8_HYDCU		tcx:Tcr_0990		WP_011370412.1﻿	NC_007520.2					CP000109	ABB41585.1
Tilletiaria anomala UBC 951	8	1037660		K437DRAFT_257458	A0A066VYE2	A0A066VYE2_TILAU	25264699			XP_013242421.1﻿	XM_013386967.1					JMSN01000060	KDN43560.1
Treponema pallidum	10	243276	TP0977	TP_0977	O83942	GCH1L_TREPA	34332317	tpa:TP_0977		WP_010882421.1﻿	NC_021490.2					AE000520	AAC65932.1
Trichoplax adhaerens	9	10228		TRIADDRAFT_28889	B3S4G2	B3S4G2_TRIAD	6756387	tad:TRIADDRAFT_28889		XP_002115002.1﻿	XM_002114966.1					DS985249	EDV22458.1
Tropheryma whipplei str. Twist	7	203267	TWT257	TWT_257	Q83GL0	Q83GL0_TROWT		twh:TWT_257								AE014184	AAO44354.1
Trypanosoma cruzi (strain CL Brener)	9	353153		Tc00.1047053511163.30	Q4CW43	Q4CW43_TRYCC	3536323	tcr:511163.30		XP_806345.1	XM_801252.1					AAHK01001674	EAN84494.1
Tuber melanosporum (strain Mel28)	10	656061	GSTUM00012204001	GSTUM_00012204001	D5GQ55	D5GQ55_TUBMM	9185228	tml:GSTUM_00012204001		XP_002842457.1﻿	XM_002842411.1					FN430382	CAZ86648.1
Ustilago maydis	10	237631	UMAG10165	UMAG_10165	A0A0D1CU19	A0A0D1CU19_USTMA	23566230	uma:UMAG_10165		XP_011388846.1﻿	XM_011390544.1					CM003144	KIS69973.1
Vavraia culicis (isolate floridensis)	9	948595	VCUG00501	VCUG_00501	L2GXP9	L2GXP9_VAVCU	19878388			XP_008073521.1﻿	XM_008075330.1					GL877408	ELA48078.1
Veillonella parvula	10	479436	Vpar1190	Vpar_1190	D1BNB3	D1BNB3_VEIPT	8636659	vpr:Vpar_1190		WP_012864565.1﻿	NC_013520.1					CP001820	ACZ24870.1
Verrucomicrobium (Termite Associated, TAV) sp. strain 2 (TAV-2)	1		ObacDRAFT_2308
Vibrio cholerae	9	243277	VC2093	VC_2093	Q9KQA7	GCH1L_VIBCH		vch:VC2093		NP_231725.1﻿	NC_002505.1					AE003852	AAF95239.1
Vibrio fischeri/Aliivibrio fischeri	12	312309	VF0817	VF_0817	Q5E6N4	Q5E6N4_ALIF1	54163485	vfi:VF_0817		WP_011261499.1﻿	NC_006840.2	YP_204200.1﻿	NC_006840.2			CP000020	AAW85312.1
Wallemia ichthyophaga	9	1299270		J056_003971	R9AHY1	R9AHY1_WALI9	20376923	wic:J056_003971		XP_009267455.1﻿	XM_009269180.1					KE007229	EOR01735.1
Wolinella succinogenes	7	273121	WS_2117	WS2117	Q7MQP7	Q7MQP7_WOLSU		wsu:WS2117								BX571662	CAE11115.1
Xenopus tropicalis	4	8364	nif3l1		A4IGP2	A4IGP2_XENTR										BC135188	AAI35189.1
Xiphophorus maculatus	2	8083			M4AH89	M4AH89_XIPMA
Xylona heveae TC161	9	1328760	A0A165G8H1_9PEZI	L228DRAFT_248626	A0A165G8H1	A0A165G8H1_XYLHT	28898036			XP_018187422.1﻿	XM_018332899.1					KV407460	KZF21867.1
Yarrowia lipolytica	11	284591	YALI0B11704p, YALI0B11704g	YALI0_B11704g	Q6CEZ2	Q6CEZ2_YARLI	2907179	yli:YALI0B11704g		XP_500770.1﻿	XM_500770.1					CR382128	CAG83020.1
Yersinia pestis	24	632	YPO_2697	YPO2697, y1272, YP_2501	Q8ZD91	GCH1L_YERPE	49536787	ype:YPO2697, ypj:CH55_1472, ypk:y1272, ypl:CH46_2410, ypm:YP_2501, ypv:BZ15_834, ypw:CH59_3579		WP_002354507.1﻿	NZ_WUCM01000006.1	YP_002347645.1﻿	NC_003143.1			AL590842, CAL21316.1	AE009952, AAM84846.1	AE017042, AAS62700.1
Zootermopsis nevadensis	5	136037		L798_07717	A0A067R4D1	A0A067R4D1_ZOONE										KK852704	KDR18041.1
