# Supplementary material for: Comparative Genomic Analysis of the DUF34 Protein Family Suggests Role as a Metal Ion Chaperone or Insertase
Source: Preprints.org preprint supplement (doi:10.20944/preprints202107.0280.v1), 2021-07-13
Supplement: Supplementary file 2 [file Data Table 10.xlsx]

## Sheet: Content
Data Table 10		Reed et al., 2021
Co-regulated genes of Homo sapiens DUF34 homolog; all top genes reported at or above score cut-off of 0.98; co-regulatory proteins exported to STRING-db (Permalink: https://version-11-0b.string-db.org/cgi/network?networkId=bXPk8HQtAarr; Figure S11; Data Table 12 ):
a	exported data from ProteomeHD for Homo sapiens DUF34 homolog (Q9GZT8-2), 114 genes (excluding NIF3L1)
b	functional cluster analysis (via DAVID suite) of ProteomeHD data for Homo sapiens DUF34 homolog (Q9GZT8-2)
c.1	GSEA (via g:Profiler, g:GOSt) of ProteomeHD data for Homo sapiens DUF34 homolog (Q9GZT8-2); evidence format of one column per query gene with evidence codes
c.2	GSEA (via g:Profiler, g:GOSt) of ProteomeHD data for Homo sapiens DUF34 homolog (Q9GZT8-2); list of genes in a query that belong to a particular term (intersections)

## Sheet: a
# This file was downloaded from proteomehd.net. It contains proteins co-regulated with your query (above selected score cut-off).
# You query was: Q9GZT8-2. Your selected score cut-off was: 0.98
uniprot_acc	protein_names	gene_names	percentile_score	co-regulation score
Q9GZT8-2	NIF3-like protein 1	NIF3L1	1	1
P20618	Proteasome subunit beta type-1	PSMB1	0.9946	0.020166
P49720	Proteasome subunit beta type-3	PSMB3	0.994367	0.019709
P49721	Proteasome subunit beta type-2	PSMB2	0.993924	0.018887
Q16774	Guanylate kinase	GUK1	0.993757	0.018604
Q9NPA0	ER membrane protein complex subunit 7	EMC7	0.993163	0.017688
P25786	Proteasome subunit alpha type-1	PSMA1	0.992923	0.017353
Q7Z4G1	COMM domain-containing protein 6	COMMD6	0.992731	0.017093
Q14980-2	Nuclear mitotic apparatus protein 1	NUMA1	0.992343	0.016602
O75044	SLIT-ROBO Rho GTPase-activating protein 2	SRGAP2	0.992155	0.016387
Q96AJ9-1	Vesicle transport through interaction with t-SNAREs homolog 1A	VTI1A	0.992087	0.016309
Q8TAQ2	SWI/SNF complex subunit SMARCC2	SMARCC2	0.991902	0.01609
Q8IWT0	Protein archease	ZBTB8OS	0.991731	0.015911
P60059	Protein transport protein Sec61 subunit gamma	SEC61G	0.991655	0.015828
P25787	Proteasome subunit alpha type-2	PSMA2	0.991574	0.015739
O75688	Protein phosphatase 1B	PPM1B	0.991116	0.015281
O14653	Golgi SNAP receptor complex member 2	GOSR2	0.990906	0.015089
P61978-2	Heterogeneous nuclear ribonucleoprotein K	HNRNPK	0.990844	0.015036
Q92600	CCR4-NOT transcription complex subunit 9	CNOT9	0.990753	0.014955
Q9GZQ3	COMM domain-containing protein 5	COMMD5	0.990689	0.014897
Q99590	Protein SCAF11	SCAF11	0.990527	0.014749
Q2KHT3	Protein CLEC16A	CLEC16A	0.99045	0.01468
O60925	Prefoldin subunit 1	PFDN1	0.990406	0.014645
Q9UK45	U6 snRNA-associated Sm-like protein LSm7	LSM7	0.990391	0.014632
Q53F19	Nuclear cap-binding protein subunit 3	NCBP3	0.990224	0.01449
Q96I24	Far upstream element-binding protein 3	FUBP3	0.99016	0.014436
Q9P086	Mediator of RNA polymerase II transcription subunit 11	MED11	0.990006	0.014311
Q6GMV3	Putative peptidyl-tRNA hydrolase PTRHD1	PTRHD1	0.989929	0.014248
Q9UM13	Anaphase-promoting complex subunit 10	ANAPC10	0.989841	0.014178
Q15052	Rho guanine nucleotide exchange factor 6	ARHGEF6	0.989553	0.013955
Q15027	Arf-GAP with coiled-coil ANK repeat and PH domain-containing protein 1	ACAP1	0.989346	0.013805
P60900	Proteasome subunit alpha type-6	PSMA6	0.988913	0.013494
Q96DE0	U8 snoRNA-decapping enzyme	NUDT16	0.98873	0.013373
Q14653	Interferon regulatory factor 3	IRF3	0.988681	0.013338
Q7L5N1	COP9 signalosome complex subunit 6	COPS6	0.988609	0.01329
P25789	Proteasome subunit alpha type-4	PSMA4	0.988582	0.013271
Q9Y6G5	COMM domain-containing protein 10	COMMD10	0.988463	0.013193
P61599	N-alpha-acetyltransferase 20	NAA20	0.988395	0.013148
Q9BRT3	Migration and invasion enhancer 1	MIEN1	0.988276	0.01307
O14818	Proteasome subunit alpha type-7	PSMA7	0.988201	0.013024
Q86VX2-2	COMM domain-containing protein 7	COMMD7	0.988106	0.012964
Q8N6L1	Keratinocyte-associated protein 2	KRTCAP2	0.988104	0.012963
Q9NPE3	H/ACA ribonucleoprotein complex subunit 3	NOP10	0.98809	0.012954
Q8WV22	Non-structural maintenance of chromosomes element 1 homolog	NSMCE1	0.987762	0.012751
O00233	26S proteasome non-ATPase regulatory subunit 9	PSMD9	0.987687	0.012707
Q9Y4Y9	U6 snRNA-associated Sm-like protein LSm5	LSM5	0.986681	0.012145
Q96EL2	28S ribosomal protein S24 mitochondrial	MRPS24	0.986317	0.011956
P25788-2	Proteasome subunit alpha type-3	PSMA3	0.986304	0.01195
P82664	28S ribosomal protein S10 mitochondrial	MRPS10	0.986222	0.01191
P55735	Protein SEC13 homolog	SEC13	0.986193	0.011896
P62913-2	60S ribosomal protein L11	RPL11	0.986145	0.011873
Q8TAF3	WD repeat-containing protein 48	WDR48	0.985908	0.011754
Q15819	Ubiquitin-conjugating enzyme E2 variant 2	UBE2V2	0.985792	0.011697
P61970	Nuclear transport factor 2	NUTF2	0.985711	0.011656
Q9BQ48	39S ribosomal protein L34 mitochondrial	MRPL34	0.985591	0.0116
Q2M389	WASH complex subunit 4	WASHC4	0.985548	0.011581
Q8NHV4-3	Protein NEDD1	NEDD1	0.985501	0.011558
Q9HB19	Pleckstrin homology domain-containing family A member 2	PLEKHA2	0.985361	0.011492
Q8IYS2	Uncharacterized protein KIAA2013	KIAA2013	0.985309	0.011469
O15212	Prefoldin subunit 6	PFDN6	0.985194	0.011419
Q969F9	Hermansky-Pudlak syndrome 3 protein	HPS3	0.984862	0.011266
Q0PNE2	Elongator complex protein 6	ELP6	0.984755	0.011219
Q9UKZ1	CCR4-NOT transcription complex subunit 11	CNOT11	0.984747	0.011215
Q96CB8	Integrator complex subunit 12	INTS12	0.984419	0.011076
Q96B45	BLOC-1-related complex subunit 7	BORCS7	0.984311	0.011031
Q9BQE3	Tubulin alpha-1C chain	TUBA1C	0.98424	0.011003
Q9P2A4	ABI gene family member 3	ABI3	0.984209	0.010989
Q03188	Centromere protein C	CENPC	0.984192	0.010982
Q12904	Aminoacyl tRNA synthase complex-interacting multifunctional protein 1	AIMP1	0.983876	0.010853
Q9Y6K0	Choline/ethanolaminephosphotransferase 1	CEPT1	0.98375	0.010806
P62136	Serine/threonine-protein phosphatase PP1-alpha catalytic subunit	PPP1CA	0.983437	0.010684
Q96HR3-2	Mediator of RNA polymerase II transcription subunit 30	MED30	0.983389	0.010665
Q3ZAQ7	Vacuolar ATPase assembly integral membrane protein VMA21	VMA21	0.982866	0.010469
Q9P0J7	E3 ubiquitin-protein ligase KCMF1	KCMF1	0.982775	0.010437
Q9NWS0	PIH1 domain-containing protein 1	PIH1D1	0.982677	0.010404
Q9HAU5	Regulator of nonsense transcripts 2	UPF2	0.9826	0.010374
Q13595	Transformer-2 protein homolog alpha	TRA2A	0.982599	0.010374
Q9H000	Probable E3 ubiquitin-protein ligase makorin-2	MKRN2	0.982514	0.010343
P19838	Nuclear factor NF-kappa-B p105 subunit	NFKB1	0.982398	0.010302
P17066	Heat shock 70 kDa protein 6	HSPA6	0.982241	0.010246
P61758	Prefoldin subunit 3	VBP1	0.982209	0.010235
Q567U6	Coiled-coil domain-containing protein 93	CCDC93	0.982135	0.01021
Q9UNH7	Sorting nexin-6	SNX6	0.982083	0.010192
Q9NZM3-2	Intersectin-2	ITSN2	0.982069	0.010187
O14980	Exportin-1	XPO1	0.982065	0.010185
P61513	60S ribosomal protein L37a	RPL37A	0.98203	0.010173
Q5T200	Zinc finger CCCH domain-containing protein 13	ZC3H13	0.981905	0.010129
Q3ZCM7	Tubulin beta-8 chain	TUBB8	0.98178	0.010087
Q8N668	COMM domain-containing protein 1	COMMD1	0.981696	0.01006
Q9BU61	NADH dehydrogenase	NDUFAF3	0.98167	0.010051
Q15369	Elongin-C	ELOC	0.981659	0.010047
P52747-2	Zinc finger protein 143	ZNF143	0.981555	0.010014
P52655	Transcription initiation factor IIA subunit 1	GTF2A1	0.981376	0.009957
P62312	U6 snRNA-associated Sm-like protein LSm6	LSM6	0.981108	0.009872
Q3MHD2	Protein LSM12 homolog	LSM12	0.98105	0.009853
Q16629-3	Serine/arginine-rich splicing factor 7	SRSF7	0.980962	0.009826
P55036	26S proteasome non-ATPase regulatory subunit 4	PSMD4	0.980901	0.009808
O75821	Eukaryotic translation initiation factor 3 subunit G	EIF3G	0.980897	0.009807
P41227	N-alpha-acetyltransferase 10	NAA10	0.980731	0.009755
O94913	Pre-mRNA cleavage complex 2 protein Pcf11	PCF11	0.980633	0.009725
Q9BYN0	Sulfiredoxin-1	SRXN1	0.980583	0.00971
Q8ND56	Protein LSM14 homolog A	LSM14A	0.980581	0.009709
Q9BSV6	tRNA-splicing endonuclease subunit Sen34	TSEN34	0.980548	0.0097
Q9NVC6	Mediator of RNA polymerase II transcription subunit 17	MED17	0.980468	0.009675
Q7Z6M1	Rab9 effector protein with kelch motifs	RABEPK	0.980456	0.009671
Q13951	Core-binding factor subunit beta	CBFB	0.980437	0.009665
Q9H444	Charged multivesicular body protein 4b	CHMP4B	0.980411	0.009657
Q9BPX5	Actin-related protein 2/3 complex subunit 5-like protein	ARPC5L	0.980372	0.009644
Q7Z7F7	39S ribosomal protein L55 mitochondrial	MRPL55	0.980367	0.009643
Q9UIV1	CCR4-NOT transcription complex subunit 7	CNOT7	0.980254	0.009608
Q9Y4Z0	U6 snRNA-associated Sm-like protein LSm4	LSM4	0.980253	0.009608
Q99856	AT-rich interactive domain-containing protein 3A	ARID3A	0.980236	0.009603
Q15528-2	Mediator of RNA polymerase II transcription subunit 22	MED22	0.980157	0.00958
Q9Y676	28S ribosomal protein S18b mitochondrial	MRPS18B	0.980073	0.009555
Q92973-2	Transportin-1	TNPO1	0.98001	0.009535

## Sheet: b
Annotation Cluster 1		Enrichment Score: 9.18			Count	P_Value	Benjamini			Not Clustered (131 terms)
	UP_KEYWORDS	Threonine protease	RT		9	6.6e-14	5.2e-12			Sublist	Category	Term	RT	Genes	Count	LT	PH	PT	%	P-Value	Benjamini
	INTERPRO	Proteasome, subunit alpha/beta	RT		9	8.4e-14	1.9e-11				UP_KEYWORDS	Acetylation	RT		56	112	3424	20581	50	1.1e-15	1.7e-13
	GOTERM_BP_DIRECT	NIK/NF-kappaB signaling	RT		12	2.2e-13	7.4e-11				GOTERM_CC_DIRECT	nucleoplasm	RT		50	110	2784	18224	44.6	1.5e-13	2.3e-11
	GOTERM_MF_DIRECT	threonine-type endopeptidase activity	RT		9	2.4e-13	3.6e-11				UP_KEYWORDS	Nucleus	RT		65	112	5244	20581	58	6e-13	3.1e-11
	GOTERM_CC_DIRECT	proteasome core complex	RT		9	2.4e-13	2.3e-11				GOTERM_CC_DIRECT	cytosol	RT		47	110	3315	18224	42	4.8e-09	1.8e-07
	GOTERM_BP_DIRECT	regulation of cellular amino acid metabolic process	RT		11	5e-13	7.4e-11				GOTERM_MF_DIRECT	protein binding	RT		80	102	8785	16881	71.4	4.5e-08	3.5e-06
	GOTERM_BP_DIRECT	negative regulation of ubiquitin-protein ligase activity involved in mitotic cell cycle	RT		12	5e-13	7.4e-11				UP_KEYWORDS	Cytoplasm	RT		53	112	4816	20581	47.3	5.1e-08	1.3e-06
	GOTERM_BP_DIRECT	positive regulation of ubiquitin-protein ligase activity involved in regulation of mitotic cell cycle transition	RT		12	1.1e-12	1.2e-10				GOTERM_CC_DIRECT	cytoplasmic mRNA processing body	RT		8	110	78	18224	7.1	4.2e-07	1.3e-05
	GOTERM_BP_DIRECT	regulation of mRNA stability	RT		13	1.4e-12	1.2e-10				GOTERM_CC_DIRECT	nucleus	RT		56	110	5415	18224	50	4.2e-06	0.00011
	GOTERM_BP_DIRECT	anaphase-promoting complex-dependent catabolic process	RT		12	1.7e-12	1.2e-10				GOTERM_CC_DIRECT	cytoplasm	RT		54	110	5222	18224	48.2	7.9e-06	0.00017
	GOTERM_BP_DIRECT	antigen processing and presentation of exogenous peptide antigen via MHC class I, TAP-dependent	RT		11	4.7e-12	2.9e-10				UP_KEYWORDS	Isopeptide bond	RT		20	112	1132	20581	17.9	9.4e-06	0.00018
	UP_KEYWORDS	Proteasome	RT		10	1e-11	4e-10				UP_KEYWORDS	Phosphoprotein	RT		66	112	8246	20581	58.9	6.1e-05	0.00087
	KEGG_PATHWAY	Proteasome	RT		10	2.7e-11	2.6e-09				UP_KEYWORDS	Ubl conjugation	RT		22	112	1705	20581	19.6	0.00028	0.0036
	GOTERM_BP_DIRECT	stimulatory C-type lectin receptor signaling pathway	RT		12	4.1e-11	2.3e-09				GOTERM_MF_DIRECT	RNA binding	RT		12	102	547	16881	10.7	0.00043	0.022
	GOTERM_CC_DIRECT	proteasome complex	RT		10	8e-11	5.1e-09				UP_KEYWORDS	Protein transport	RT		12	112	610	20581	10.7	0.00046	0.0055
	GOTERM_BP_DIRECT	tumor necrosis factor-mediated signaling pathway	RT		12	1.5e-10	7.2e-09				GOTERM_CC_DIRECT	extracellular exosome	RT		31	110	2811	18224	27.7	0.00084	0.015
	SMART	SM00948	RT		6	1.7e-10	8.2e-09				GOTERM_MF_DIRECT	poly(A) RNA binding	RT		17	102	1129	16881	15.2	0.0011	0.039
	GOTERM_BP_DIRECT	positive regulation of canonical Wnt signaling pathway	RT		12	1.8e-10	7.8e-09				GOTERM_CC_DIRECT	polysome	RT		4	110	38	18224	3.6	0.0015	0.022
	GOTERM_BP_DIRECT	Wnt signaling pathway, planar cell polarity pathway	RT		11	2.3e-10	9.1e-09				INTERPRO	Proteasome B-type subunit	RT		3	111	11	18559	2.7	0.0018	0.051
	INTERPRO	Proteasome, alpha-subunit, N-terminal domain	RT		6	3.7e-10	2.7e-08				UP_KEYWORDS	mRNA transport	RT		5	112	106	20581	4.5	0.0026	0.026
	INTERPRO	Proteasome A-type subunit	RT		6	3.7e-10	2.7e-08				GOTERM_CC_DIRECT	small nucleolar ribonucleoprotein complex	RT		3	110	13	18224	2.7	0.0026	0.036
	GOTERM_CC_DIRECT	proteasome core complex, alpha-subunit complex	RT		6	3.9e-10	1.8e-08				GOTERM_BP_DIRECT	cytoplasmic mRNA processing body assembly	RT		3	104	13	16792	2.7	0.0028	0.047
	GOTERM_BP_DIRECT	proteolysis involved in cellular protein catabolic process	RT		9	4.7e-10	1.7e-08				GOTERM_BP_DIRECT	mRNA transport	RT		4	104	47	16792	3.6	0.003	0.048
	GOTERM_BP_DIRECT	protein polyubiquitination	RT		13	1.3e-09	4.5e-08				GOTERM_CC_DIRECT	intracellular membrane-bounded organelle	RT		10	110	558	18224	8.9	0.0063	0.07
	GOTERM_BP_DIRECT	T cell receptor signaling pathway	RT		12	1.7e-09	5.3e-08				GOTERM_MF_DIRECT	transcription cofactor activity	RT		4	102	71	16881	3.6	0.0089	0.23
	GOTERM_BP_DIRECT	Fc-epsilon receptor signaling pathway	RT		12	1.2e-08	3.5e-07				GOTERM_CC_DIRECT	nucleolus	RT		12	110	857	18224	10.7	0.014	0.14
	GOTERM_BP_DIRECT	proteasome-mediated ubiquitin-dependent protein catabolic process	RT		12	4.6e-08	1.3e-06				GOTERM_MF_DIRECT	NF-kappaB binding	RT		3	102	30	16881	2.7	0.014	0.24
	GOTERM_BP_DIRECT	negative regulation of canonical Wnt signaling pathway	RT		11	6.1e-08	1.6e-06				GOTERM_MF_DIRECT	Ran GTPase binding	RT		3	102	30	16881	2.7	0.014	0.24
	GOTERM_BP_DIRECT	MAPK cascade	RT		11	4.8e-06	0.00012				UP_KEYWORDS	Endosome	RT		8	112	481	20581	7.1	0.015	0.12
	UP_KEYWORDS	Host-virus interaction	RT		12	7.6e-06	0.00017				UP_KEYWORDS	Cytoplasmic vesicle	RT		8	112	490	20581	7.1	0.017	0.12
	GOTERM_BP_DIRECT	viral process	RT		11	1.5e-05	0.00035				GOTERM_BP_DIRECT	microtubule-based process	RT		3	104	36	16792	2.7	0.02	0.28
	INTERPRO	Proteasome, beta-type subunit, conserved site	RT		4	4.3e-05	0.0016				GOTERM_MF_DIRECT	protein homodimerization activity	RT		10	102	730	16881	8.9	0.031	0.47
	GOTERM_BP_DIRECT	ubiquitin-dependent protein catabolic process	RT		8	0.00013	0.0027				UP_KEYWORDS	Nitration	RT		3	112	51	20581	2.7	0.031	0.19
	UP_KEYWORDS	Protease	RT		9	0.0093	0.081				KEGG_PATHWAY	Herpes simplex infection	RT		5	54	183	6879	4.5	0.052	1
	UP_KEYWORDS	Hydrolase	RT		15	0.065	0.37				KEGG_PATHWAY	Pathogenic Escherichia coli infection	RT		3	54	51	6879	2.7	0.058	1
											GOTERM_MF_DIRECT	transcription coactivator activity	RT		5	102	248	16881	4.5	0.062	0.75
Annotation Cluster 2		Enrichment Score: 4.12			Count	P_Value	Benjamini				GOTERM_BP_DIRECT	retrograde transport, endosome to Golgi	RT		3	104	69	16792	2.7	0.067	0.72
	UP_SEQ_FEATURE	domain:COMM	RT		5	1.8e-07	5.8e-05				GOTERM_BP_DIRECT	snRNA transcription from RNA polymerase II promoter	RT		3	104	70	16792	2.7	0.069	0.72
	INTERPRO	COMM domain	RT		5	2.4e-07	1.3e-05				UP_KEYWORDS	tRNA processing	RT		3	112	84	20581	2.7	0.076	0.4
	UP_KEYWORDS	Ubl conjugation pathway	RT		10	0.011	0.094				UP_KEYWORDS	Translocation	RT		3	112	84	20581	2.7	0.076	0.4
	GOTERM_BP_DIRECT	negative regulation of NF-kappaB transcription factor activity	RT		3	0.07	0.72				GOTERM_CC_DIRECT	kinetochore	RT		3	110	81	18224	2.7	0.085	0.67
											UP_KEYWORDS	Manganese	RT		4	112	194	20581	3.6	0.088	0.43
Annotation Cluster 3		Enrichment Score: 3.5			Count	P_Value	Benjamini				UP_KEYWORDS	Coiled coil	RT		23	112	3036	20581	20.5	0.088	0.43
	GOTERM_CC_DIRECT	U6 snRNP	RT		4	7.2e-06	0.00017				UP_KEYWORDS	Methylation	RT		10	112	1001	20581	8.9	0.091	0.43
	INTERPRO	Like-Sm (LSM) domain	RT		5	1.1e-05	0.0005				GOTERM_BP_DIRECT	mRNA processing	RT		4	104	179	16792	3.6	0.098	0.87
	UP_KEYWORDS	mRNA processing	RT		11	1.3e-05	0.00022				KEGG_PATHWAY	Endocytosis	RT		5	54	241	6879	4.5	0.11	1
	UP_KEYWORDS	RNA-binding	RT		15	1.4e-05	0.00022				GOTERM_CC_DIRECT	late endosome membrane	RT		3	110	101	18224	2.7	0.12	0.89
	KEGG_PATHWAY	RNA degradation	RT		7	2.4e-05	0.0012				GOTERM_BP_DIRECT	sister chromatid cohesion	RT		3	104	103	16792	2.7	0.13	1
	GOTERM_BP_DIRECT	exonucleolytic nuclear-transcribed mRNA catabolic process involved in deadenylation-dependent decay	RT		5	2.8e-05	0.00062				GOTERM_MF_DIRECT	unfolded protein binding	RT		3	102	110	16881	2.7	0.14	1
	KEGG_PATHWAY	Spliceosome	RT		8	6.3e-05	0.002				KEGG_PATHWAY	RNA transport	RT		4	54	172	6879	3.6	0.15	1
	SMART	Sm	RT		4	0.00016	0.004				KEGG_PATHWAY	Influenza A	RT		4	54	174	6879	3.6	0.15	1
	INTERPRO	Ribonucleoprotein LSM domain	RT		4	0.00025	0.0079				KEGG_PATHWAY	mRNA surveillance pathway	RT		3	54	91	6879	2.7	0.16	1
	GOTERM_BP_DIRECT	mRNA splicing, via spliceosome	RT		8	0.00043	0.0086				GOTERM_CC_DIRECT	nuclear membrane	RT		4	110	229	18224	3.6	0.16	0.95
	UP_KEYWORDS	mRNA splicing	RT		8	0.00053	0.0055				GOTERM_CC_DIRECT	membrane	RT		18	110	2200	18224	16.1	0.16	0.95
	UP_KEYWORDS	Spliceosome	RT		5	0.005	0.046				GOTERM_MF_DIRECT	identical protein binding	RT		8	102	749	16881	7.1	0.16	1
	GOTERM_BP_DIRECT	RNA splicing	RT		4	0.082	0.8				UP_SEQ_FEATURE	compositionally biased region:Gly-rich	RT		4	112	252	20063	3.6	0.16	1
	GOTERM_CC_DIRECT	spliceosomal complex	RT		3	0.11	0.82				GOTERM_BP_DIRECT	nuclear-transcribed mRNA catabolic process, nonsense-mediated decay	RT		3	104	119	16792	2.7	0.17	1
	GOTERM_BP_DIRECT	RNA processing	RT		3	0.12	0.98				GOTERM_MF_DIRECT	mRNA binding	RT		3	102	125	16881	2.7	0.17	1
											GOTERM_BP_DIRECT	intracellular protein transport	RT		4	104	236	16792	3.6	0.18	1
Annotation Cluster 4		Enrichment Score: 2.04			Count	P_Value	Benjamini				GOTERM_BP_DIRECT	autophagy	RT		3	104	133	16792	2.7	0.2	1
	GOTERM_CC_DIRECT	mediator complex	RT		4	0.0012	0.019				GOTERM_CC_DIRECT	cytoplasmic, membrane-bounded vesicle	RT		3	110	138	18224	2.7	0.2	1
	GOTERM_MF_DIRECT	RNA polymerase II transcription cofactor activity	RT		4	0.0013	0.039				GOTERM_BP_DIRECT	translational initiation	RT		3	104	137	16792	2.7	0.21	1
	GOTERM_BP_DIRECT	regulation of transcription from RNA polymerase II promoter	RT		10	0.0016	0.03				GOTERM_BP_DIRECT	positive regulation of transcription, DNA-templated	RT		6	104	515	16792	5.4	0.21	1
	UP_KEYWORDS	Transcription regulation	RT		22	0.013	0.098				UP_SEQ_FEATURE	compositionally biased region:Glu-rich	RT		4	112	292	20063	3.6	0.22	1
	UP_KEYWORDS	Transcription	RT		22	0.017	0.12				GOTERM_BP_DIRECT	transcription initiation from RNA polymerase II promoter	RT		3	104	152	16792	2.7	0.24	1
	UP_KEYWORDS	Activator	RT		9	0.027	0.17				KEGG_PATHWAY	Epstein-Barr virus infection	RT		3	54	122	6879	2.7	0.24	1
	GOTERM_BP_DIRECT	transcription, DNA-templated	RT		14	0.42	1				GOTERM_CC_DIRECT	nuclear envelope	RT		3	110	159	18224	2.7	0.25	1
											UP_KEYWORDS	Alternative splicing	RT		62	112	10587	20581	55.4	0.26	1
Annotation Cluster 5		Enrichment Score: 2.01			Count	P_Value	Benjamini				UP_KEYWORDS	Transport	RT		14	112	1978	20581	12.5	0.27	1
	UP_KEYWORDS	Ribonucleoprotein	RT		14	7.4e-09	2.3e-07				GOTERM_BP_DIRECT	defense response to virus	RT		3	104	165	16792	2.7	0.27	1
	UP_KEYWORDS	Ribosomal protein	RT		7	0.0005	0.0055				KEGG_PATHWAY	Measles	RT		3	54	133	6879	2.7	0.27	1
	GOTERM_BP_DIRECT	mitochondrial translational elongation	RT		5	0.0018	0.034				UP_KEYWORDS	Lipid-binding	RT		3	112	209	20581	2.7	0.31	1
	GOTERM_BP_DIRECT	mitochondrial translational termination	RT		5	0.0019	0.034				KEGG_PATHWAY	Phagosome	RT		3	54	150	6879	2.7	0.32	1
	GOTERM_CC_DIRECT	ribosome	RT		6	0.0032	0.041				INTERPRO	Armadillo-type fold	RT		4	111	351	18559	3.6	0.35	1
	GOTERM_MF_DIRECT	structural constituent of ribosome	RT		6	0.011	0.23				UP_KEYWORDS	Magnesium	RT		5	112	552	20581	4.5	0.35	1
	GOTERM_BP_DIRECT	translation	RT		6	0.02	0.28				GOTERM_MF_DIRECT	RNA polymerase II core promoter proximal region sequence-specific DNA binding	RT		4	102	355	16881	3.6	0.36	1
	GOTERM_CC_DIRECT	mitochondrial inner membrane	RT		7	0.049	0.42				KEGG_PATHWAY	Protein processing in endoplasmic reticulum	RT		3	54	169	6879	2.7	0.38	1
	KEGG_PATHWAY	Ribosome	RT		4	0.087	1				GOTERM_BP_DIRECT	rRNA processing	RT		3	104	214	16792	2.7	0.38	1
	UP_SEQ_FEATURE	transit peptide:Mitochondrion	RT		4	0.5	1				INTERPRO	Armadillo-like helical	RT		3	111	225	18559	2.7	0.39	1
	UP_KEYWORDS	Transit peptide	RT		4	0.56	1				GOTERM_CC_DIRECT	endosome	RT		3	110	225	18224	2.7	0.39	1
	UP_KEYWORDS	Mitochondrion	RT		6	0.73	1				UP_KEYWORDS	Repressor	RT		5	112	592	20581	4.5	0.4	1
	GOTERM_CC_DIRECT	mitochondrion	RT		6	0.91	1				GOTERM_CC_DIRECT	intracellular	RT		10	110	1332	18224	8.9	0.4	1
											UP_SEQ_FEATURE	cross-link:Glycyl lysine isopeptide (Lys-Gly) (interchain with G-Cter in ubiquitin)	RT		3	112	255	20063	2.7	0.41	1
Annotation Cluster 6		Enrichment Score: 1.77			Count	P_Value	Benjamini				UP_KEYWORDS	Lysosome	RT		3	112	263	20581	2.7	0.42	1
	GOTERM_CC_DIRECT	mediator complex	RT		4	0.0012	0.019				UP_SEQ_FEATURE	compositionally biased region:Ser-rich	RT		4	112	441	20063	3.6	0.44	1
	GOTERM_MF_DIRECT	RNA polymerase II transcription cofactor activity	RT		4	0.0013	0.039				UP_KEYWORDS	Microtubule	RT		3	112	280	20581	2.7	0.45	1
	GOTERM_BP_DIRECT	protein ubiquitination	RT		6	0.07	0.72				GOTERM_BP_DIRECT	apoptotic process	RT		5	104	567	16792	4.5	0.46	1
	GOTERM_MF_DIRECT	ubiquitin protein ligase activity	RT		4	0.1	0.97				GOTERM_CC_DIRECT	centrosome	RT		4	110	426	18224	3.6	0.47	1
	GOTERM_CC_DIRECT	ubiquitin ligase complex	RT		3	0.14	0.91				KEGG_PATHWAY	Regulation of actin cytoskeleton	RT		3	54	210	6879	2.7	0.48	1
											GOTERM_MF_DIRECT	GTPase activator activity	RT		3	102	279	16881	2.7	0.5	1
Annotation Cluster 7		Enrichment Score: 1.75			Count	P_Value	Benjamini				GOTERM_MF_DIRECT	transcription factor binding	RT		3	102	284	16881	2.7	0.51	1
	GOTERM_CC_DIRECT	CCR4-NOT complex	RT		3	0.004	0.048				INTERPRO	Zinc finger, RING-type	RT		3	111	295	18559	2.7	0.52	1
	GOTERM_BP_DIRECT	DNA damage response, signal transduction by p53 class mediator resulting in cell cycle arrest	RT		4	0.0065	0.1				KEGG_PATHWAY	MAPK signaling pathway	RT		3	54	253	6879	2.7	0.59	1
	GOTERM_BP_DIRECT	nuclear-transcribed mRNA poly(A) tail shortening	RT		3	0.014	0.2				KEGG_PATHWAY	HTLV-I infection	RT		3	54	254	6879	2.7	0.59	1
	UP_KEYWORDS	Translation regulation	RT		4	0.019	0.13				UP_KEYWORDS	Chromosome	RT		3	112	400	20581	2.7	0.64	1
	UP_KEYWORDS	RNA-mediated gene silencing	RT		3	0.033	0.19				UP_SEQ_FEATURE	compositionally biased region:Poly-Ala	RT		3	112	404	20063	2.7	0.66	1
	GOTERM_BP_DIRECT	gene silencing by RNA	RT		3	0.15	1				GOTERM_BP_DIRECT	cell proliferation	RT		3	104	366	16792	2.7	0.66	1
											GOTERM_MF_DIRECT	GTP binding	RT		3	102	384	16881	2.7	0.67	1
Annotation Cluster 8		Enrichment Score: 1.67			Count	P_Value	Benjamini				UP_SEQ_FEATURE	mutagenesis site	RT		12	112	2191	20063	10.7	0.68	1
	GOTERM_CC_DIRECT	prefoldin complex	RT		3	0.00073	0.014				UP_SEQ_FEATURE	compositionally biased region:Poly-Pro	RT		3	112	421	20063	2.7	0.68	1
	INTERPRO	Prefoldin	RT		3	0.01	0.25				GOTERM_CC_DIRECT	focal adhesion	RT		3	110	391	18224	2.7	0.68	1
	UP_KEYWORDS	Chaperone	RT		4	0.095	0.44				GOTERM_MF_DIRECT	chromatin binding	RT		3	102	391	16881	2.7	0.68	1
	GOTERM_BP_DIRECT	protein folding	RT		3	0.3	1				GOTERM_BP_DIRECT	protein transport	RT		3	104	395	16792	2.7	0.7	1
											GOTERM_CC_DIRECT	protein complex	RT		3	110	412	18224	2.7	0.71	1
Annotation Cluster 9		Enrichment Score: 0.76			Count	P_Value	Benjamini				INTERPRO	Zinc finger, RING/FYVE/PHD-type	RT		3	111	453	18559	2.7	0.75	1
	GOTERM_BP_DIRECT	cell division	RT		6	0.064	0.72				GOTERM_CC_DIRECT	Golgi apparatus	RT		5	110	863	18224	4.5	0.76	1
	UP_KEYWORDS	Cell division	RT		5	0.16	0.69				GOTERM_MF_DIRECT	protein heterodimerization activity	RT		3	102	465	16881	2.7	0.77	1
	UP_KEYWORDS	Mitosis	RT		4	0.17	0.71				GOTERM_BP_DIRECT	negative regulation of apoptotic process	RT		3	104	455	16792	2.7	0.77	1
	GOTERM_BP_DIRECT	mitotic nuclear division	RT		4	0.2	1				UP_KEYWORDS	Apoptosis	RT		3	112	536	20581	2.7	0.79	1
	UP_KEYWORDS	Cell cycle	RT		5	0.47	1				UP_SEQ_FEATURE	compositionally biased region:Pro-rich	RT		5	112	978	20063	4.5	0.8	1
											GOTERM_BP_DIRECT	negative regulation of transcription, DNA-templated	RT		3	104	499	16792	2.7	0.82	1
Annotation Cluster 10		Enrichment Score: 0.7			Count	P_Value	Benjamini				GOTERM_MF_DIRECT	transcription factor activity, sequence-specific DNA binding	RT		5	102	961	16881	4.5	0.83	1
	SMART	SH3	RT		4	0.09	0.96				GOTERM_MF_DIRECT	nucleic acid binding	RT		5	102	985	16881	4.5	0.85	1
	UP_KEYWORDS	SH3 domain	RT		4	0.11	0.5				UP_SEQ_FEATURE	splice variant	RT		39	112	7760	20063	34.8	0.86	1
	INTERPRO	Src homology-3 domain	RT		4	0.14	1				UP_KEYWORDS	Cytoskeleton	RT		5	112	1138	20581	4.5	0.87	1
	GOTERM_CC_DIRECT	lamellipodium	RT		3	0.25	1				GOTERM_CC_DIRECT	perinuclear region of cytoplasm	RT		3	110	621	18224	2.7	0.89	1
	UP_SEQ_FEATURE	domain:SH3	RT		3	0.25	1				UP_KEYWORDS	Cell projection	RT		3	112	721	20581	2.7	0.9	1
	GOTERM_BP_DIRECT	positive regulation of GTPase activity	RT		4	0.68	1				GOTERM_BP_DIRECT	regulation of transcription, DNA-templated	RT		7	104	1504	16792	6.2	0.91	1
											GOTERM_BP_DIRECT	signal transduction	RT		5	104	1161	16792	4.5	0.93	1
Annotation Cluster 11		Enrichment Score: 0.6			Count	P_Value	Benjamini				UP_KEYWORDS	Golgi apparatus	RT		3	112	812	20581	2.7	0.94	1
	GOTERM_CC_DIRECT	ER to Golgi transport vesicle membrane	RT		3	0.039	0.35				GOTERM_MF_DIRECT	metal ion binding	RT		9	102	2069	16881	8	0.94	1
	GOTERM_CC_DIRECT	endoplasmic reticulum membrane	RT		6	0.59	1				GOTERM_BP_DIRECT	negative regulation of transcription from RNA polymerase II promoter	RT		3	104	720	16792	2.7	0.94	1
	GOTERM_CC_DIRECT	Golgi membrane	RT		4	0.69	1				UP_KEYWORDS	Disease mutation	RT		10	112	2550	20581	8.9	0.94	1
											UP_KEYWORDS	Lipoprotein	RT		3	112	852	20581	2.7	0.95	1
Annotation Cluster 12		Enrichment Score: 0.58			Count	P_Value	Benjamini				UP_KEYWORDS	Polymorphism	RT		53	112	12043	20581	47.3	1	1
	GOTERM_BP_DIRECT	transcription from RNA polymerase II promoter	RT		8	0.038	0.49				UP_KEYWORDS	Transferase	RT		4	112	1708	20581	3.6	1	1
	KEGG_PATHWAY	Viral carcinogenesis	RT		5	0.072	1				UP_SEQ_FEATURE	sequence variant	RT		56	112	12443	20063	50	1	1
	GOTERM_BP_DIRECT	positive regulation of transcription from RNA polymerase II promoter	RT		7	0.56	1				UP_KEYWORDS	Glycoprotein	RT		8	112	4551	20581	7.1	1	1
	GOTERM_MF_DIRECT	DNA binding	RT		9	0.8	1				UP_SEQ_FEATURE	disulfide bond	RT		3	112	2917	20063	2.7	1	1
	UP_KEYWORDS	DNA-binding	RT		7	0.97	1				UP_KEYWORDS	Cell membrane	RT		3	112	3175	20581	2.7	1	1
											UP_KEYWORDS	Disulfide bond	RT		3	112	3434	20581	2.7	1	1
Annotation Cluster 13		Enrichment Score: 0.57			Count	P_Value	Benjamini				GOTERM_CC_DIRECT	plasma membrane	RT		5	110	4121	18224	4.5	1	1
	UP_SEQ_FEATURE	domain:RRM	RT		3	0.17	1
	INTERPRO	Nucleotide-binding, alpha-beta plait	RT		4	0.21	1
	SMART	RRM	RT		3	0.3	1
	GOTERM_MF_DIRECT	nucleotide binding	RT		4	0.35	1
	INTERPRO	RNA recognition motif domain	RT		3	0.39	1
Annotation Cluster 14		Enrichment Score: 0.48			Count	P_Value	Benjamini
	SMART	PH	RT		4	0.16	1
	INTERPRO	Pleckstrin homology domain	RT		4	0.22	1
	UP_SEQ_FEATURE	domain:PH	RT		3	0.39	1
	INTERPRO	Pleckstrin homology-like domain	RT		4	0.47	1
	GOTERM_BP_DIRECT	positive regulation of GTPase activity	RT		4	0.68	1
Annotation Cluster 15		Enrichment Score: 0.36			Count	P_Value	Benjamini
	UP_SEQ_FEATURE	repeat:WD 6	RT		3	0.3	1
	UP_SEQ_FEATURE	repeat:WD 5	RT		3	0.38	1
	SMART	WD40	RT		3	0.4	1
	UP_SEQ_FEATURE	repeat:WD 4	RT		3	0.41	1
	UP_SEQ_FEATURE	repeat:WD 3	RT		3	0.44	1
	UP_KEYWORDS	WD repeat	RT		3	0.45	1
	UP_SEQ_FEATURE	repeat:WD 1	RT		3	0.46	1
	UP_SEQ_FEATURE	repeat:WD 2	RT		3	0.46	1
	INTERPRO	WD40 repeat	RT		3	0.47	1
	INTERPRO	WD40-repeat-containing domain	RT		3	0.54	1
	INTERPRO	WD40/YVTN repeat-like-containing domain	RT		3	0.59	1
Annotation Cluster 16		Enrichment Score: 0.22			Count	P_Value	Benjamini
	GOTERM_MF_DIRECT	ligase activity	RT		3	0.48	1
	UP_KEYWORDS	Ligase	RT		3	0.56	1
	GOTERM_MF_DIRECT	zinc ion binding	RT		6	0.84	1
Annotation Cluster 17		Enrichment Score: 0.11			Count	P_Value	Benjamini
	UP_KEYWORDS	Zinc-finger	RT		10	0.63	1
	UP_KEYWORDS	Metal-binding	RT		18	0.78	1
	GOTERM_MF_DIRECT	zinc ion binding	RT		6	0.84	1
	UP_KEYWORDS	Zinc	RT		10	0.9	1
Annotation Cluster 18		Enrichment Score: 0.06			Count	P_Value	Benjamini
	GOTERM_CC_DIRECT	endoplasmic reticulum membrane	RT		6	0.59	1
	UP_KEYWORDS	Endoplasmic reticulum	RT		6	0.69	1
	UP_KEYWORDS	Membrane	RT		26	1	1
	UP_KEYWORDS	Transmembrane helix	RT		12	1	1
	UP_KEYWORDS	Transmembrane	RT		12	1	1
	GOTERM_CC_DIRECT	integral component of membrane	RT		12	1	1
	UP_SEQ_FEATURE	transmembrane region	RT		7	1	1
Annotation Cluster 19		Enrichment Score: 0.01			Count	P_Value	Benjamini
	UP_KEYWORDS	Nucleotide-binding	RT		6	0.97	1
	UP_KEYWORDS	ATP-binding	RT		3	1	1
	GOTERM_MF_DIRECT	ATP binding	RT		3	1	1
Annotation Cluster 20		Enrichment Score: 0			Count	P_Value	Benjamini
	UP_SEQ_FEATURE	topological domain:Extracellular	RT		3	1	1
	UP_SEQ_FEATURE	topological domain:Cytoplasmic	RT		4	1	1
	UP_SEQ_FEATURE	transmembrane region	RT		7	1	1

## Sheet: c.1
# version: e104_eg51_p15_3922dba
# date: 6/25/2021	9:13:22 AM
# organism: hsapiens
# all results: false
# ordered: false
# no iea: false
# sources: GO:MF	GO:BP	GO:CC	KEGG	REAC	WP	TF	MIRNA	HPA	CORUM	HP
# combined: false
# numeric ns: ENTREZGENE_ACC
# domain scope: annotated
# measure underrepresentation: false
# significance threshold method: g_SCS
# user threshold: 0.05
# no evidences: false
# query genes included: query_1<ENSG00000008018	ENSG00000277791	ENSG00000126067	ENSG00000143774	ENSG00000134153	ENSG00000129084	ENSG00000188243	ENSG00000137497	ENSG00000266028	ENSG00000151532	ENSG00000139613	ENSG00000176261	ENSG00000132432	ENSG00000106588	ENSG00000138032	ENSG00000108433	ENSG00000165119	ENSG00000144580	ENSG00000170619	ENSG00000139218	ENSG00000038532	ENSG00000113068	ENSG00000130332	ENSG00000074356	ENSG00000107164	ENSG00000161920	ENSG00000184924	ENSG00000164162	ENSG00000129675	ENSG00000072818	ENSG00000100902	ENSG00000198585	ENSG00000126456	ENSG00000168090	ENSG00000041357	ENSG00000145781	ENSG00000173418	ENSG00000141741	ENSG00000101182	ENSG00000149600	ENSG00000163463	ENSG00000182117	ENSG00000169189	ENSG00000110801	ENSG00000106355	ENSG00000062582	ENSG00000100567	ENSG00000048544	ENSG00000157020	ENSG00000142676
# query genes not included: none
# query genes duplicates: none
source	term_name	term_id	adjusted_p_value	negative_log10_of_adjusted_p_value	term_size	query_size	intersection_size	effective_domain_size	PSMB1	PSMB3	PSMB2	GUK1	EMC7	PSMA1	COMMD6	NUMA1	SRGAP2	VTI1A	SMARCC2	ZBTB8OS	SEC61G	PSMA2	PPM1B	GOSR2	HNRNPK	CNOT9	COMMD5	SCAF11	CLEC16A	PFDN1	LSM7	NCBP3	FUBP3	MED11	PTRHD1	ANAPC10	ARHGEF6	ACAP1	PSMA6	NUDT16	IRF3	COPS6	PSMA4	COMMD10	NAA20	MIEN1	PSMA7	COMMD7	KRTCAP2
GO:MF	threonine-type endopeptidase activity	GO:0004298	0.000537733	3.26943	14	111	4	18679	IEA	IEA	IEA																																IEA
GO:MF	RNA binding	GO:0003723	0.00111175	2.95399	1951	111	29	18679						TAS											HDA,IBA,TAS,IEA			HDA			IBA,NAS,IEA	IDA,IMP,HDA,IBA,IEA	HDA,IBA,IEA						IDA,NAS,IEA	IDA,IBA,IEA
GO:MF	threonine-type peptidase activity	GO:0070003	0.00456459	2.3406	23	111	4	18679	IEA	IEA	IEA																																IEA
GO:BP	mRNA catabolic process	GO:0006402	6.98326e-15	14.1559	388	107	24	18123	TAS	TAS	TAS			TAS								TAS				TAS,IEA					TAS,IEA								TAS	IDA,IBA			TAS				TAS
GO:BP	regulation of mRNA stability	GO:0043488	3.13926e-14	13.5032	247	107	20	18123	TAS	TAS	TAS			TAS								TAS				TAS					TAS								TAS				TAS				TAS
GO:BP	mRNA metabolic process	GO:0016071	5.06238e-14	13.2956	880	107	32	18123	TAS	TAS	TAS			TAS								TAS			IBA,TAS,IC,IEA	TAS,IEA		IDA,IBA,TAS,IEA			IDA,TAS,IEA	IEA							TAS	IDA,IBA			TAS				TAS
GO:BP	regulation of mRNA catabolic process	GO:0061013	5.87023e-14	13.2313	255	107	20	18123	TAS	TAS	TAS			TAS								TAS				TAS					TAS								TAS				TAS				TAS
GO:BP	regulation of mRNA metabolic process	GO:1903311	7.71952e-14	13.1124	384	107	23	18123	TAS	TAS	TAS			TAS								TAS			IBA,IEA	TAS					TAS								TAS				TAS				TAS
GO:BP	RNA catabolic process	GO:0006401	7.72224e-14	13.1123	431	107	24	18123	TAS	TAS	TAS			TAS								TAS				TAS,IEA					TAS,IEA								TAS	IDA,IBA			TAS				TAS
GO:BP	regulation of RNA stability	GO:0043487	7.96277e-14	13.0989	259	107	20	18123	TAS	TAS	TAS			TAS								TAS				TAS					TAS								TAS				TAS				TAS
GO:BP	proteasomal ubiquitin-independent protein catabolic process	GO:0010499	7.86308e-12	11.1044	23	107	9	18123	IBA	IBA	IBA			IBA								IBA																	IBA				IBA				IBA
GO:BP	regulation of hematopoietic stem cell differentiation	GO:1902036	2.56911e-11	10.5902	74	107	12	18123	TAS	TAS	TAS			TAS								TAS																	TAS				TAS				TAS
GO:BP	nucleobase-containing compound catabolic process	GO:0034655	4.45736e-11	10.3509	573	107	24	18123	TAS	TAS	TAS			TAS								TAS				TAS,IEA					TAS,IEA								TAS	IDA,ISS,IBA,TAS			TAS				TAS
GO:BP	regulation of transcription from RNA polymerase II promoter in response to hypoxia	GO:0061418	4.9868e-11	10.3022	78	107	12	18123	TAS	TAS	TAS			TAS								TAS																	TAS				TAS				TAS
GO:BP	anaphase-promoting complex-dependent catabolic process	GO:0031145	1.94937e-10	9.71011	87	107	12	18123	TAS	TAS	TAS			TAS								TAS														TAS,IEA			TAS				TAS				TAS
GO:BP	heterocycle catabolic process	GO:0046700	2.23353e-10	9.65101	617	107	24	18123	TAS	TAS	TAS			TAS								TAS				TAS,IEA					TAS,IEA								TAS	IDA,ISS,IBA,TAS			TAS				TAS
GO:BP	pre-replicative complex assembly	GO:0036388	2.45239e-10	9.61041	66	107	11	18123	TAS	TAS	TAS			TAS								TAS																	TAS				TAS				TAS
GO:BP	regulation of cellular amino acid metabolic process	GO:0006521	2.45239e-10	9.61041	66	107	11	18123	TAS	TAS	TAS			TAS								TAS																	TAS				TAS				TAS
GO:BP	hematopoietic stem cell differentiation	GO:0060218	2.58369e-10	9.58776	89	107	12	18123	TAS	TAS	TAS			TAS								TAS																	TAS				TAS				TAS
GO:BP	cellular nitrogen compound catabolic process	GO:0044270	2.75402e-10	9.56003	623	107	24	18123	TAS	TAS	TAS			TAS								TAS				TAS,IEA					TAS,IEA								TAS	IDA,ISS,IBA,TAS			TAS				TAS
GO:BP	regulation of hematopoietic progenitor cell differentiation	GO:1901532	3.40078e-10	9.46842	91	107	12	18123	TAS	TAS	TAS			TAS								TAS																	TAS				TAS				TAS
GO:BP	aromatic compound catabolic process	GO:0019439	4.30178e-10	9.36635	636	107	24	18123	TAS	TAS	TAS			TAS								TAS				TAS,IEA					TAS,IEA								TAS	IDA,ISS,IBA,TAS			TAS				TAS
GO:BP	antigen processing and presentation of peptide antigen via MHC class I	GO:0002474	9.58361e-10	9.01847	99	107	12	18123	TAS	TAS	TAS			TAS								TAS																	TAS				TAS				TAS
GO:BP	antigen processing and presentation of exogenous peptide antigen via MHC class I, TAP-dependent	GO:0002479	1.07037e-09	8.97047	75	107	11	18123	TAS	TAS	TAS			TAS								TAS																	TAS				TAS				TAS
GO:BP	organic cyclic compound catabolic process	GO:1901361	1.08554e-09	8.96435	664	107	24	18123	TAS	TAS	TAS			TAS								TAS				TAS,IEA					TAS,IEA								TAS	IDA,ISS,IBA,TAS			TAS				TAS
GO:BP	interleukin-1-mediated signaling pathway	GO:0070498	1.96522e-09	8.70659	105	107	12	18123	TAS	TAS	TAS			TAS								TAS																	TAS				TAS				TAS
GO:BP	antigen processing and presentation of exogenous peptide antigen via MHC class I	GO:0042590	2.23446e-09	8.65083	80	107	11	18123	TAS	TAS	TAS			TAS								TAS																	TAS				TAS				TAS
GO:BP	regulation of cellular amine metabolic process	GO:0033238	3.39241e-09	8.46949	83	107	11	18123	TAS	TAS	TAS			TAS								TAS																	TAS				TAS				TAS
GO:BP	regulation of cellular catabolic process	GO:0031329	3.46665e-09	8.46009	913	107	27	18123	TAS	TAS	TAS			TAS								TAS				TAS			IMP,IBA		TAS								TAS				TAS				TAS
GO:BP	regulation of transcription from RNA polymerase II promoter in response to stress	GO:0043618	3.8569e-09	8.41376	111	107	12	18123	TAS	TAS	TAS			TAS								TAS																	TAS				TAS				TAS
GO:BP	stimulatory C-type lectin receptor signaling pathway	GO:0002223	4.29876e-09	8.36666	112	107	12	18123	TAS	TAS	TAS			TAS								TAS																	TAS				TAS				TAS
GO:BP	cellular response to lectin	GO:1990858	4.78617e-09	8.32001	113	107	12	18123	TAS	TAS	TAS			TAS								TAS																	TAS				TAS				TAS
GO:BP	response to lectin	GO:1990840	4.78617e-09	8.32001	113	107	12	18123	TAS	TAS	TAS			TAS								TAS																	TAS				TAS				TAS
GO:BP	regulation of stem cell differentiation	GO:2000736	5.91464e-09	8.22807	115	107	12	18123	TAS	TAS	TAS			TAS								TAS																	TAS				TAS				TAS
GO:BP	innate immune response activating cell surface receptor signaling pathway	GO:0002220	5.91464e-09	8.22807	115	107	12	18123	TAS	TAS	TAS			TAS								TAS																	TAS				TAS				TAS
GO:BP	innate immune response-activating signal transduction	GO:0002758	6.56509e-09	8.18276	116	107	12	18123	TAS	TAS	TAS			TAS								TAS																	TAS				TAS				TAS
GO:BP	regulation of DNA-templated transcription in response to stress	GO:0043620	7.27989e-09	8.13788	117	107	12	18123	TAS	TAS	TAS			TAS								TAS																	TAS				TAS				TAS
GO:BP	positive regulation of canonical Wnt signaling pathway	GO:0090263	1.00868e-08	7.99624	153	107	13	18123	TAS	TAS	TAS			TAS								TAS	IBA																TAS				TAS				TAS
GO:BP	SCF-dependent proteasomal ubiquitin-dependent protein catabolic process	GO:0031146	1.54775e-08	7.8103	95	107	11	18123	TAS	TAS	TAS			TAS								TAS																	TAS				TAS				TAS
GO:BP	negative regulation of G2/M transition of mitotic cell cycle	GO:0010972	2.45027e-08	7.61079	99	107	11	18123	TAS	TAS	TAS			TAS								TAS																	TAS				TAS				TAS
GO:BP	regulation of catabolic process	GO:0009894	2.91992e-08	7.53463	1081	107	28	18123	TAS	TAS	TAS			TAS								TAS				TAS			IMP,IBA		TAS								TAS				TAS				TAS
GO:BP	negative regulation of cell cycle G2/M phase transition	GO:1902750	3.05962e-08	7.51433	101	107	11	18123	TAS	TAS	TAS			TAS								TAS																	TAS				TAS				TAS
GO:BP	negative regulation of mitotic cell cycle phase transition	GO:1901991	5.80975e-08	7.23584	260	107	15	18123	TAS	TAS	TAS			TAS								TAS				TAS													TAS				TAS				TAS
GO:BP	positive regulation of innate immune response	GO:0045089	6.21425e-08	7.20661	217	107	14	18123	TAS	TAS	TAS			TAS								TAS																	TAS		IEA		TAS				TAS
GO:BP	negative regulation of gene expression	GO:0010629	6.9434e-08	7.15843	1470	107	32	18123	TAS	TAS	TAS			TAS								TAS	IMP		IEA	IBA,TAS,IEA					TAS,IEA								TAS	IDA,ISS,IBA	TAS		TAS				TAS
GO:BP	Wnt signaling pathway, planar cell polarity pathway	GO:0060071	7.85465e-08	7.10487	110	107	11	18123	TAS	TAS	TAS			TAS								TAS																	TAS				TAS				TAS
GO:BP	activation of innate immune response	GO:0002218	8.63073e-08	7.06395	144	107	12	18123	TAS	TAS	TAS			TAS								TAS																	TAS				TAS				TAS
GO:BP	regulation of establishment of planar polarity	GO:0090175	1.16257e-07	6.93458	114	107	11	18123	TAS	TAS	TAS			TAS								TAS																	TAS				TAS				TAS
GO:BP	positive regulation of Wnt signaling pathway	GO:0030177	1.19747e-07	6.92174	186	107	13	18123	TAS	TAS	TAS			TAS								TAS	IBA																TAS				TAS				TAS
GO:BP	cellular macromolecule catabolic process	GO:0044265	1.47084e-07	6.83243	1244	107	29	18123	IBA,TAS,IEA	IBA,TAS,IEA	IBA,TAS,IEA			IBA,TAS,IEA								ISS,IBA,TAS,IEA				TAS,IEA					TAS,IEA					TAS,IEA			IMP,IBA,TAS,IEA	IDA,IBA			IBA,TAS,IEA				IBA,TAS,IEA
GO:BP	positive regulation of response to biotic stimulus	GO:0002833	4.76431e-07	6.322	253	107	14	18123	TAS	TAS	TAS			TAS								TAS																	TAS		IEA		TAS				TAS
GO:BP	establishment of tissue polarity	GO:0007164	4.85644e-07	6.31368	130	107	11	18123	TAS	TAS	TAS			TAS								TAS																	TAS				TAS				TAS
GO:BP	establishment of planar polarity	GO:0001736	4.85644e-07	6.31368	130	107	11	18123	TAS	TAS	TAS			TAS								TAS																	TAS				TAS				TAS
GO:BP	Fc-epsilon receptor signaling pathway	GO:0038095	4.88116e-07	6.31148	167	107	12	18123	TAS	TAS	TAS			TAS								TAS																	TAS				TAS				TAS
GO:BP	gene expression	GO:0010467	8.05741e-07	6.0938	6192	107	68	18123	TAS	TAS	TAS			TAS	IDA,IBA				IDA,IBA,NAS	IDA,IBA,TAS,IEA		TAS	IMP		IBA,TAS,IC,IEA	IBA,TAS,IEA		IDA,IBA,TAS,IEA			IDA,TAS,IEA	IEA	IDA,IBA	IEA					IMP,TAS	IDA,ISS,IBA	IDA,IMP,ISS,IBA,TAS,IEA		TAS		IBA		TAS	IDA,IBA
GO:BP	hematopoietic progenitor cell differentiation	GO:0002244	8.38841e-07	6.07632	175	107	12	18123	TAS	TAS	TAS			TAS								TAS																	TAS				TAS				TAS
GO:BP	antigen processing and presentation of exogenous peptide antigen	GO:0002478	8.38841e-07	6.07632	175	107	12	18123	TAS	TAS	TAS			TAS								TAS																	TAS				TAS				TAS
GO:BP	regulation of innate immune response	GO:0045088	8.91078e-07	6.05008	316	107	15	18123	TAS	TAS	TAS			TAS								TAS																	TAS		IEA		TAS				TAS
GO:BP	negative regulation of mitotic cell cycle	GO:0045930	9.72223e-07	6.01223	318	107	15	18123	TAS	TAS	TAS			TAS								TAS				TAS													TAS				TAS				TAS
GO:BP	tumor necrosis factor-mediated signaling pathway	GO:0033209	1.08849e-06	5.96317	179	107	12	18123	TAS	TAS	TAS			TAS								TAS																	TAS				TAS				TAS	IDA,IBA
GO:BP	mitotic cell cycle	GO:0000278	1.25578e-06	5.90109	1098	107	26	18123	TAS	TAS	TAS			TAS		IDA,IMP,ISS,IBA,IEA						TAS				TAS										TAS			TAS				TAS				TAS
GO:BP	antigen processing and presentation of exogenous antigen	GO:0019884	1.40345e-06	5.8528	183	107	12	18123	TAS	TAS	TAS			TAS								TAS																	TAS				TAS				TAS
GO:BP	negative regulation of cell cycle phase transition	GO:1901988	1.55314e-06	5.80879	329	107	15	18123	TAS	TAS	TAS			TAS								TAS				TAS													TAS				TAS				TAS
GO:BP	cellular response to interleukin-1	GO:0071347	1.79853e-06	5.74508	187	107	12	18123	TAS	TAS	TAS			TAS								TAS																	TAS				TAS				TAS
GO:BP	macromolecule catabolic process	GO:0009057	1.84616e-06	5.73373	1479	107	30	18123	IBA,TAS,IEA	IBA,TAS,IEA	IBA,TAS,IEA			IBA,TAS,IEA								ISS,IBA,TAS,IEA				TAS,IEA					TAS,IEA					TAS,IEA			IMP,IBA,TAS,IEA	IDA,IBA			IBA,TAS,IEA				IBA,TAS,IEA
GO:BP	mitotic cell cycle process	GO:1903047	2.04628e-06	5.68903	956	107	24	18123	TAS	TAS	TAS			TAS		IDA,IMP,ISS,IBA,IEA						TAS				TAS										TAS			TAS				TAS				TAS
GO:BP	regulation of mitotic cell cycle phase transition	GO:1901990	2.11042e-06	5.67563	453	107	17	18123	TAS	TAS	TAS			TAS								TAS				TAS										TAS			TAS				TAS				TAS
GO:BP	non-canonical Wnt signaling pathway	GO:0035567	2.42154e-06	5.61591	151	107	11	18123	TAS	TAS	TAS			TAS								TAS																	TAS				TAS				TAS
GO:BP	antigen processing and presentation of peptide antigen	GO:0048002	2.58095e-06	5.58822	193	107	12	18123	TAS	TAS	TAS			TAS								TAS																	TAS				TAS				TAS
GO:BP	morphogenesis of a polarized epithelium	GO:0001738	2.59774e-06	5.5854	152	107	11	18123	TAS	TAS	TAS			TAS								TAS																	TAS				TAS				TAS
GO:BP	negative regulation of cell cycle process	GO:0010948	2.7235e-06	5.56487	400	107	16	18123	TAS	TAS	TAS			TAS								TAS				TAS													TAS				TAS				TAS
GO:BP	regulation of cell cycle process	GO:0010564	3.00668e-06	5.52191	815	107	22	18123	TAS	TAS	TAS			TAS		IDA,IMP						TAS				TAS										TAS			TAS	IMP			TAS				TAS
GO:BP	NIK/NF-kappaB signaling	GO:0038061	3.07741e-06	5.51181	196	107	12	18123	TAS	TAS	TAS			TAS								TAS	IMP																TAS				TAS				TAS
GO:BP	protein ubiquitination	GO:0016567	3.44673e-06	5.46259	900	107	23	18123	TAS	TAS	TAS			TAS								TAS												IEA		IDA,IBA,IEA			TAS				TAS				TAS
GO:BP	T cell receptor signaling pathway	GO:0050852	4.33663e-06	5.36285	202	107	12	18123	TAS	TAS	TAS			TAS								TAS																	TAS				TAS				TAS
GO:BP	cellular nitrogen compound metabolic process	GO:0034641	4.48197e-06	5.34853	6576	107	69	18123	TAS	TAS	TAS	IDA,IMP,TAS,IEA		TAS	IDA,IBA				IDA,IBA,NAS	IDA,IBA,TAS,IEA		TAS			IBA,TAS,IC,IEA	IBA,TAS,IEA		IDA,IBA,TAS,IEA			IDA,TAS,IEA	IEA	IDA	IEA					IMP,TAS	IDA,IMP,ISS,IBA,TAS,IEA	IDA,IMP,IBA,IEA	TAS	TAS				TAS	IDA,IBA
GO:BP	regulation of canonical Wnt signaling pathway	GO:0060828	4.75994e-06	5.3224	302	107	14	18123	TAS	TAS	TAS			TAS								TAS	IBA																TAS				TAS				TAS
GO:BP	regulation of G2/M transition of mitotic cell cycle	GO:0010389	4.84966e-06	5.31429	204	107	12	18123	TAS	TAS	TAS			TAS								TAS																	TAS				TAS				TAS
GO:BP	posttranscriptional regulation of gene expression	GO:0010608	6.17718e-06	5.20921	928	107	23	18123	TAS	TAS	TAS			TAS								TAS				IBA,TAS,IEA					TAS								TAS				TAS				TAS
GO:BP	cellular amine metabolic process	GO:0044106	6.60232e-06	5.1803	166	107	11	18123	TAS	TAS	TAS			TAS								TAS																	TAS				TAS				TAS
GO:BP	regulation of response to biotic stimulus	GO:0002831	6.7084e-06	5.17338	426	107	16	18123	TAS	TAS	TAS			TAS								TAS	IMP																TAS		IEA		TAS				TAS
GO:BP	regulation of cell cycle G2/M phase transition	GO:1902749	7.90356e-06	5.10218	213	107	12	18123	TAS	TAS	TAS			TAS								TAS																	TAS				TAS				TAS
GO:BP	cellular response to hypoxia	GO:0071456	8.33238e-06	5.07923	214	107	12	18123	TAS	TAS	TAS			TAS								TAS																	TAS				TAS				TAS
GO:BP	amine metabolic process	GO:0009308	9.02101e-06	5.04475	171	107	11	18123	TAS	TAS	TAS			TAS								TAS																	TAS				TAS				TAS
GO:BP	response to interleukin-1	GO:0070555	9.74745e-06	5.01111	217	107	12	18123	TAS	TAS	TAS			TAS								TAS																	TAS				TAS				TAS
GO:BP	regulation of Wnt signaling pathway	GO:0030111	1.10224e-05	4.95772	380	107	15	18123	TAS	TAS	TAS			TAS								TAS	IBA																TAS				TAS				TAS
GO:BP	proteasome-mediated ubiquitin-dependent protein catabolic process	GO:0043161	1.13226e-05	4.94605	442	107	16	18123	IBA,TAS	IBA,TAS,IEA	IBA,TAS			IBA,TAS								ISS,IBA,TAS														TAS,IEA			IBA,TAS				IBA,TAS				IBA,TAS
GO:BP	protein-containing complex subunit organization	GO:0043933	1.2611e-05	4.89925	2017	107	34	18123	TAS	TAS	TAS			TAS		IMP			IDA			TAS		TAS				IDA,IBA	IMP,IBA										TAS				TAS				TAS
GO:BP	cellular response to decreased oxygen levels	GO:0036294	1.39255e-05	4.85619	224	107	12	18123	TAS	TAS	TAS			TAS								TAS																	TAS				TAS				TAS
GO:BP	mitotic cell cycle phase transition	GO:0044772	1.61596e-05	4.79157	588	107	18	18123	TAS	TAS	TAS			TAS								TAS				TAS										TAS			TAS				TAS				TAS
GO:BP	protein modification by small protein conjugation	GO:0032446	1.72532e-05	4.76313	980	107	23	18123	TAS	TAS	TAS			TAS								TAS												IEA		IDA,IBA,IEA			TAS				TAS				TAS
GO:BP	nucleic acid metabolic process	GO:0090304	1.84878e-05	4.73312	5234	107	59	18123	TAS	TAS	TAS			TAS	IDA,IBA				IDA,IBA,NAS	IDA,IBA,TAS,IEA		TAS			IBA,TAS,IC,IEA	TAS,IEA		IDA,IBA,TAS,IEA			IDA,TAS,IEA	IEA	IDA	IEA					IMP,TAS	IDA,IMP,ISS,IBA	IDA,IMP,IBA,IEA	TAS	TAS				TAS	IDA,IBA
GO:BP	regulation of animal organ morphogenesis	GO:2000027	2.05356e-05	4.68749	185	107	11	18123	TAS	TAS	TAS			TAS								TAS																	TAS				TAS				TAS
GO:BP	protein polyubiquitination	GO:0000209	2.4067e-05	4.61858	343	107	14	18123	TAS	TAS	TAS			TAS								TAS														IDA,IBA			TAS				TAS				TAS
GO:BP	antigen processing and presentation	GO:0019882	2.4952e-05	4.60289	236	107	12	18123	TAS	TAS	TAS			TAS								TAS																	TAS				TAS				TAS
GO:BP	negative regulation of canonical Wnt signaling pathway	GO:0090090	2.56482e-05	4.59094	189	107	11	18123	TAS	TAS	TAS			TAS								TAS																	TAS				TAS				TAS
GO:BP	protein-DNA complex subunit organization	GO:0071824	2.68582e-05	4.57092	346	107	14	18123	TAS	TAS	TAS			TAS					IDA			TAS																	TAS				TAS				TAS
GO:BP	Fc receptor signaling pathway	GO:0038093	2.74098e-05	4.56209	238	107	12	18123	TAS	TAS	TAS			TAS								TAS																	TAS				TAS				TAS
GO:BP	RNA metabolic process	GO:0016070	2.83779e-05	4.54702	4714	107	55	18123	TAS	TAS	TAS			TAS	IDA,IBA				IDA,IBA,NAS	IDA,IBA,TAS,IEA		TAS			IBA,TAS,IC,IEA	TAS,IEA		IDA,IBA,TAS,IEA			IDA,TAS,IEA	IEA	IDA	IEA					IMP,TAS	IDA,IMP,ISS,IBA	IDA,IMP,IBA,IEA		TAS				TAS	IDA,IBA
GO:BP	canonical Wnt signaling pathway	GO:0060070	2.99404e-05	4.52374	349	107	14	18123	TAS	TAS	TAS			TAS								TAS	IBA																TAS				TAS				TAS
GO:BP	regulation of cell cycle phase transition	GO:1901987	3.14253e-05	4.50272	543	107	17	18123	TAS	TAS	TAS			TAS								TAS				TAS										TAS			TAS				TAS				TAS
GO:BP	cellular response to oxygen levels	GO:0071453	3.45326e-05	4.46177	243	107	12	18123	TAS	TAS	TAS			TAS								TAS																	TAS				TAS				TAS
GO:BP	regulation of cellular ketone metabolic process	GO:0010565	3.73795e-05	4.42737	196	107	11	18123	TAS	TAS	TAS			TAS								TAS																	TAS				TAS				TAS
GO:BP	protein-DNA complex assembly	GO:0065004	4.05922e-05	4.39156	300	107	13	18123	TAS	TAS	TAS			TAS								TAS																	TAS				TAS				TAS
GO:BP	negative regulation of cell cycle	GO:0045786	4.41302e-05	4.35526	487	107	16	18123	TAS	TAS	TAS			TAS								TAS				TAS													TAS				TAS				TAS
GO:BP	post-translational protein modification	GO:0043687	4.73597e-05	4.32459	362	107	14	18123	TAS	TAS	TAS			TAS								TAS																	TAS			TAS	TAS				TAS
GO:BP	positive regulation of defense response	GO:0031349	5.07353e-05	4.29469	364	107	14	18123	TAS	TAS	TAS			TAS								TAS																	TAS		IEA		TAS				TAS
GO:BP	cellular response to tumor necrosis factor	GO:0071356	5.53526e-05	4.25686	308	107	13	18123	TAS	TAS	TAS			TAS								TAS																	TAS				TAS				TAS	IDA,IBA
GO:BP	protein modification by small protein removal	GO:0070646	5.97287e-05	4.22382	310	107	13	18123	TAS	TAS	TAS			TAS								TAS																	TAS			IDA,IEA	TAS				TAS
GO:BP	proteasomal protein catabolic process	GO:0010498	6.53794e-05	4.18456	501	107	16	18123	IBA,TAS	IBA,TAS,IEA	IBA,TAS			IBA,TAS								ISS,IBA,TAS														TAS,IEA			IBA,TAS				IBA,TAS				IBA,TAS
GO:BP	cellular protein-containing complex assembly	GO:0034622	7.39194e-05	4.13124	1150	107	24	18123	TAS	TAS	TAS			TAS		IMP						TAS						IDA,IBA											TAS				TAS				TAS
GO:BP	stem cell differentiation	GO:0048863	7.60169e-05	4.11909	261	107	12	18123	TAS	TAS	TAS			TAS								TAS																	TAS				TAS				TAS
GO:BP	G2/M transition of mitotic cell cycle	GO:0000086	7.92781e-05	4.10085	262	107	12	18123	TAS	TAS	TAS			TAS								TAS																	TAS				TAS				TAS
GO:BP	antigen receptor-mediated signaling pathway	GO:0050851	8.98762e-05	4.04636	321	107	13	18123	TAS	TAS	TAS			TAS								TAS																	TAS				TAS				TAS
GO:BP	nucleobase-containing compound metabolic process	GO:0006139	9.38774e-05	4.02744	5752	107	61	18123	TAS	TAS	TAS	IDA,IMP,TAS,IEA		TAS	IDA,IBA				IDA,IBA,NAS	IDA,IBA,TAS,IEA		TAS			IBA,TAS,IC,IEA	TAS,IEA		IDA,IBA,TAS,IEA			IDA,TAS,IEA	IEA	IDA	IEA					IMP,TAS	IDA,IMP,ISS,IBA,TAS,IEA	IDA,IMP,IBA,IEA	TAS	TAS				TAS	IDA,IBA
GO:BP	DNA-dependent DNA replication	GO:0006261	0.000101408	3.99393	216	107	11	18123	TAS	TAS	TAS			TAS								TAS																	TAS				TAS				TAS
GO:BP	negative regulation of Wnt signaling pathway	GO:0030178	0.00012227	3.91268	220	107	11	18123	TAS	TAS	TAS			TAS								TAS																	TAS				TAS				TAS
GO:BP	cell cycle G2/M phase transition	GO:0044839	0.000124373	3.90527	273	107	12	18123	TAS	TAS	TAS			TAS								TAS																	TAS				TAS				TAS
GO:BP	response to tumor necrosis factor	GO:0034612	0.000133109	3.87579	332	107	13	18123	TAS	TAS	TAS			TAS								TAS																	TAS				TAS				TAS	IDA,IBA
GO:BP	protein modification by small protein conjugation or removal	GO:0070647	0.000147375	3.83158	1193	107	24	18123	TAS	TAS	TAS			TAS								TAS												IEA		IDA,IBA,IEA			TAS			IDA,IEA	TAS				TAS
GO:BP	cell cycle phase transition	GO:0044770	0.000151035	3.82092	681	107	18	18123	TAS	TAS	TAS			TAS								TAS				TAS										TAS			TAS				TAS				TAS
GO:BP	cell cycle process	GO:0022402	0.000157277	3.80333	1388	107	26	18123	TAS	TAS	TAS			TAS		IDA,IMP,ISS,IBA,IEA						TAS				TAS										TAS			TAS	IMP			TAS				TAS
GO:BP	regulation of mitotic cell cycle	GO:0007346	0.000177469	3.75088	612	107	17	18123	TAS	TAS	TAS			TAS								TAS				TAS										TAS			TAS				TAS				TAS
GO:BP	protein deubiquitination	GO:0016579	0.000258305	3.58787	292	107	12	18123	TAS	TAS	TAS			TAS								TAS																	TAS				TAS				TAS
GO:BP	heterocycle metabolic process	GO:0046483	0.000317095	3.49881	5929	107	61	18123	TAS	TAS	TAS	IDA,IMP,TAS,IEA		TAS	IDA,IBA				IDA,IBA,NAS	IDA,IBA,TAS,IEA		TAS			IBA,TAS,IC,IEA	TAS,IEA		IDA,IBA,TAS,IEA			IDA,TAS,IEA	IEA	IDA	IEA					IMP,TAS	IDA,IMP,ISS,IBA,TAS,IEA	IDA,IMP,IBA,IEA	TAS	TAS				TAS	IDA,IBA
GO:BP	translation	GO:0006412	0.000362172	3.44109	804	107	19	18123																		IBA,TAS,IEA					TAS
GO:BP	regulation of small molecule metabolic process	GO:0062012	0.000394759	3.40367	430	107	14	18123	TAS	TAS	TAS			TAS								TAS																	TAS				TAS				TAS
GO:BP	cellular aromatic compound metabolic process	GO:0006725	0.000424881	3.37173	5973	107	61	18123	TAS	TAS	TAS	IDA,IMP,TAS,IEA		TAS	IDA,IBA				IDA,IBA,NAS	IDA,IBA,TAS,IEA		TAS			IBA,TAS,IC,IEA	TAS,IEA		IDA,IBA,TAS,IEA			IDA,TAS,IEA	IEA	IDA	IEA					IMP,TAS	IDA,IMP,ISS,IBA,TAS,IEA	IDA,IMP,IBA,IEA	TAS	TAS				TAS	IDA,IBA
GO:BP	ubiquitin-dependent protein catabolic process	GO:0006511	0.000550948	3.25889	663	107	17	18123	IBA,TAS	IBA,TAS,IEA	IBA,TAS			IBA,TAS,IEA								ISS,IBA,TAS,IEA														TAS,IEA			IBA,TAS,IEA				IBA,TAS,IEA				IBA,TAS,IEA
GO:BP	peptide biosynthetic process	GO:0043043	0.000634423	3.19762	834	107	19	18123																		IBA,TAS,IEA					TAS
GO:BP	modification-dependent protein catabolic process	GO:0019941	0.000638212	3.19504	670	107	17	18123	IBA,TAS	IBA,TAS,IEA	IBA,TAS			IBA,TAS,IEA								ISS,IBA,TAS,IEA														TAS,IEA			IBA,TAS,IEA				IBA,TAS,IEA				IBA,TAS,IEA
GO:BP	viral process	GO:0016032	0.00065064	3.18666	1011	107	21	18123	IEA	IEA	IEA														TAS,IEA																IEA	IEA	IEA				IEA
GO:BP	cellular response to stress	GO:0033554	0.000682033	3.16619	2142	107	32	18123	TAS	TAS	TAS			TAS								TAS		TAS	IEA	TAS			IMP								NAS		TAS		TAS	TAS	TAS				TAS
GO:BP	nuclear-transcribed mRNA catabolic process, deadenylation-dependent decay	GO:0000288	0.000698858	3.15561	79	107	7	18123																		TAS					TAS
GO:BP	proteolysis involved in cellular protein catabolic process	GO:0051603	0.00076385	3.11699	760	107	18	18123	IBA,TAS,IEA	IBA,TAS,IEA	IBA,TAS,IEA			IBA,TAS,IEA								ISS,IBA,TAS,IEA														TAS,IEA			IMP,IBA,TAS,IEA				IBA,TAS,IEA				IBA,TAS,IEA
GO:BP	modification-dependent macromolecule catabolic process	GO:0043632	0.000801011	3.09636	681	107	17	18123	IBA,TAS	IBA,TAS,IEA	IBA,TAS			IBA,TAS,IEA								ISS,IBA,TAS,IEA														TAS,IEA			IBA,TAS,IEA				IBA,TAS,IEA				IBA,TAS,IEA
GO:BP	cellular component biogenesis	GO:0044085	0.000832058	3.07985	3377	107	42	18123	TAS	TAS	TAS			TAS		IMP	IDA,IMP,ISS					TAS		TAS				IDA,IBA									ISS		TAS	ISS			TAS			IDA,IBA	TAS
GO:BP	regulation of cell cycle	GO:0051726	0.000847994	3.07161	1120	107	22	18123	TAS	TAS	TAS			TAS		IDA,IMP						TAS				TAS										TAS			TAS	IMP			TAS				TAS
GO:BP	Wnt signaling pathway	GO:0016055	0.000912222	3.0399	533	107	15	18123	TAS	TAS	TAS			TAS								TAS	IBA																TAS				TAS				TAS
GO:BP	nuclear-transcribed mRNA catabolic process	GO:0000956	0.000922838	3.03487	214	107	10	18123																		TAS					TAS,IEA
GO:BP	cell-cell signaling by wnt	GO:0198738	0.000956342	3.01939	535	107	15	18123	TAS	TAS	TAS			TAS								TAS	IBA																TAS				TAS				TAS
GO:BP	cellular nitrogen compound biosynthetic process	GO:0044271	0.00101258	2.99457	5054	107	54	18123	TAS	TAS	TAS	IMP,IEA		TAS	IDA,IBA				IDA,IBA,NAS			TAS			IBA,IEA	IBA,TAS,IEA					TAS		IDA	IEA					IMP,TAS	IDA,ISS	IDA,IMP,IBA,IEA		TAS				TAS	IDA,IBA
GO:BP	cellular ketone metabolic process	GO:0042180	0.00110503	2.95662	274	107	11	18123	TAS	TAS	TAS			TAS								TAS																	TAS				TAS				TAS
GO:BP	cellular macromolecule biosynthetic process	GO:0034645	0.00121659	2.91486	5081	107	54	18123	TAS	TAS	TAS			TAS	IDA,IBA				IDA,IBA,NAS			TAS	ISS		IBA,IEA	IBA,TAS,IEA					TAS		IDA	IEA					IMP,TAS		IDA,IMP,IBA,IEA		TAS				TAS	IDA,IBA	IMP,IBA,IEA
GO:BP	cellular amino acid metabolic process	GO:0006520	0.00148322	2.8288	344	107	12	18123	TAS	TAS	TAS			TAS								TAS																	TAS				TAS				TAS
GO:BP	macromolecule biosynthetic process	GO:0009059	0.00186679	2.7289	5145	107	54	18123	TAS	TAS	TAS			TAS	IDA,IBA				IDA,IBA,NAS			TAS	ISS		IBA,IEA	IBA,TAS,IEA					TAS		IDA	IEA					IMP,TAS		IDA,IMP,IBA,IEA		TAS				TAS	IDA,IBA	IMP,IBA,IEA
GO:BP	organic cyclic compound metabolic process	GO:1901360	0.00213572	2.67045	6227	107	61	18123	TAS	TAS	TAS	IDA,IMP,TAS,IEA		TAS	IDA,IBA				IDA,IBA,NAS	IDA,IBA,TAS,IEA		TAS			IBA,TAS,IC,IEA	TAS,IEA		IDA,IBA,TAS,IEA			IDA,TAS,IEA	IEA	IDA	IEA					IMP,TAS	IDA,IMP,ISS,IBA,TAS,IEA	IDA,IMP,IBA,IEA	TAS	TAS				TAS	IDA,IBA
GO:BP	negative regulation of metabolic process	GO:0009892	0.00220183	2.65722	3498	107	42	18123	TAS	TAS	TAS			TAS					IDA			TAS	IMP		IEA	IBA,TAS,IEA			IMP	IDA	TAS,IEA								TAS	IDA,ISS,IBA	TAS,IEA		TAS				TAS	IDA,IBA
GO:BP	exonucleolytic catabolism of deadenylated mRNA	GO:0043928	0.00226431	2.64506	33	107	5	18123																							TAS
GO:BP	cellular catabolic process	GO:0044248	0.00234114	2.63057	2381	107	33	18123	IBA,TAS,IEA	IBA,TAS,IEA	IBA,TAS,IEA			IBA,TAS,IEA				IMP				ISS,IBA,TAS,IEA				TAS,IEA			IMP,IBA,IEA		TAS,IEA					TAS,IEA			IMP,IBA,TAS,IEA	IDA,ISS,IBA,TAS			IBA,TAS,IEA				IBA,TAS,IEA
GO:BP	cellular protein catabolic process	GO:0044257	0.00236288	2.62656	822	107	18	18123	IBA,TAS,IEA	IBA,TAS,IEA	IBA,TAS,IEA			IBA,TAS,IEA								ISS,IBA,TAS,IEA														TAS,IEA			IMP,IBA,TAS,IEA				IBA,TAS,IEA				IBA,TAS,IEA
GO:BP	cytokine-mediated signaling pathway	GO:0019221	0.00244603	2.61154	824	107	18	18123	TAS	TAS	TAS			TAS								TAS				IEA													TAS		TAS,IEA		TAS				TAS	IDA,IBA
GO:BP	negative regulation of macromolecule metabolic process	GO:0010605	0.00266929	2.5736	3262	107	40	18123	TAS	TAS	TAS			TAS					IDA			TAS	IMP		IEA	IBA,TAS,IEA				IDA	TAS,IEA								TAS	IDA,ISS,IBA	TAS,IEA		TAS				TAS	IDA,IBA
GO:BP	RNA processing	GO:0006396	0.00270361	2.56806	1010	107	20	18123												IDA,IBA,TAS,IEA					IBA,TAS,IC,IEA			IDA,IBA,TAS,IEA			IDA,TAS,IEA	IEA								ISS
GO:BP	response to hypoxia	GO:0001666	0.00291773	2.53495	367	107	12	18123	TAS	TAS	TAS			TAS								TAS																	TAS				TAS				TAS
GO:BP	nuclear-transcribed mRNA catabolic process, exonucleolytic	GO:0000291	0.00306824	2.51311	35	107	5	18123																							TAS
GO:BP	positive regulation of response to external stimulus	GO:0032103	0.00361753	2.44159	518	107	14	18123	TAS	TAS	TAS			TAS								TAS																	TAS		IEA		TAS				TAS
GO:BP	positive regulation of mRNA metabolic process	GO:1903313	0.00365956	2.43657	144	107	8	18123																		TAS					TAS
GO:BP	cell cycle	GO:0007049	0.00425433	2.37117	1867	107	28	18123	TAS	TAS	TAS			TAS		IDA,IMP,ISS,IBA,IEA						TAS				TAS										TAS,IEA			TAS	IMP			TAS				TAS
GO:BP	response to decreased oxygen levels	GO:0036293	0.00441691	2.35488	382	107	12	18123	TAS	TAS	TAS			TAS								TAS																	TAS				TAS				TAS
GO:BP	mRNA destabilization	GO:0061157	0.00549163	2.2603	107	107	7	18123																		TAS					TAS
GO:BP	amide biosynthetic process	GO:0043604	0.00647375	2.18884	975	107	19	18123																		IBA,TAS,IEA					TAS
GO:BP	positive regulation of mRNA catabolic process	GO:0061014	0.00660538	2.1801	110	107	7	18123																		TAS					TAS
GO:BP	RNA destabilization	GO:0050779	0.00701604	2.15391	111	107	7	18123																		TAS					TAS
GO:BP	immune response-activating signal transduction	GO:0002757	0.00750009	2.12493	475	107	13	18123	TAS	TAS	TAS			TAS								TAS																	TAS				TAS				TAS
GO:BP	immune response-activating cell surface receptor signaling pathway	GO:0002429	0.00750009	2.12493	475	107	13	18123	TAS	TAS	TAS			TAS								TAS																	TAS				TAS				TAS
GO:BP	DNA replication	GO:0006260	0.00845723	2.07277	338	107	11	18123	TAS	TAS	TAS			TAS								TAS																	TAS				TAS				TAS
GO:BP	cell surface receptor signaling pathway involved in cell-cell signaling	GO:1905114	0.00856263	2.06739	639	107	15	18123	TAS	TAS	TAS			TAS								TAS	IBA																TAS				TAS				TAS
GO:BP	organic substance catabolic process	GO:1901575	0.00896762	2.04732	2289	107	31	18123	IBA,TAS,IEA	IBA,TAS,IEA	IBA,TAS,IEA			IBA,TAS,IEA								ISS,IBA,TAS,IEA				TAS,IEA					TAS,IEA					TAS,IEA			IMP,IBA,TAS,IEA	IDA,ISS,IBA,TAS			IBA,TAS,IEA				IBA,TAS,IEA
GO:BP	peptide metabolic process	GO:0006518	0.00906489	2.04264	998	107	19	18123																		IBA,TAS,IEA					TAS
GO:BP	response to oxygen levels	GO:0070482	0.00911097	2.04044	410	107	12	18123	TAS	TAS	TAS			TAS								TAS																	TAS				TAS				TAS
GO:BP	protein-containing complex assembly	GO:0065003	0.00972178	2.01225	1724	107	26	18123	TAS	TAS	TAS			TAS		IMP						TAS		TAS				IDA,IBA											TAS				TAS				TAS
GO:BP	cellular component assembly	GO:0022607	0.0159136	1.79823	3104	107	37	18123	TAS	TAS	TAS			TAS		IMP	IDA,IMP,ISS					TAS		TAS				IDA,IBA									ISS		TAS				TAS			IDA,IBA	TAS
GO:BP	immune response-regulating cell surface receptor signaling pathway	GO:0002768	0.0161147	1.79278	510	107	13	18123	TAS	TAS	TAS			TAS								TAS																	TAS				TAS				TAS
GO:BP	immune response-regulating signaling pathway	GO:0002764	0.0171541	1.76563	513	107	13	18123	TAS	TAS	TAS			TAS								TAS																	TAS				TAS				TAS
GO:BP	macromolecule metabolic process	GO:0043170	0.0184107	1.73493	9867	107	80	18123	IBA,TAS,IEA	IBA,TAS,IEA	IBA,TAS,IEA			IBA,TAS,IEA	IDA,IBA				IDA,IBA,NAS	IDA,IBA,TAS,IEA		ISS,IBA,TAS,IEA	IDA,IMP,ISS,TAS,IEA		IBA,TAS,IC,IEA	IMP,IBA,TAS,IEA		IDA,IBA,TAS,IEA		IDA	IDA,TAS,IEA	IEA	IDA,IBA	IEA		IDA,IBA,TAS,IEA			IMP,IBA,TAS,IEA	IDA,IMP,ISS,IBA,IEA	IDA,IMP,ISS,IBA,TAS,IEA	IDA,TAS,IEA	IBA,TAS,IEA		IBA		IBA,TAS,IEA	IDA,IBA	IMP,IBA,IEA
GO:BP	catabolic process	GO:0009056	0.0249451	1.60302	2779	107	34	18123	IBA,TAS,IEA	IBA,TAS,IEA	IBA,TAS,IEA			IBA,TAS,IEA				IMP				ISS,IBA,TAS,IEA				TAS,IEA			IMP,IBA,IEA		TAS,IEA					TAS,IEA			IMP,IBA,TAS,IEA	IDA,ISS,IBA,TAS			IBA,TAS,IEA				IBA,TAS,IEA
GO:BP	regulation of nucleobase-containing compound metabolic process	GO:0019219	0.0269715	1.56909	4123	107	44	18123	TAS	TAS	TAS			TAS	IDA,IBA				IDA,IBA,NAS			TAS			IBA,IEA	TAS,IEA					TAS		IDA	IEA					IMP,TAS	ISS	IDA,IMP,IBA,IEA		TAS				TAS	IDA,IBA
GO:BP	protein catabolic process	GO:0030163	0.0280629	1.55187	983	107	18	18123	IBA,TAS,IEA	IBA,TAS,IEA	IBA,TAS,IEA			IBA,TAS,IEA								ISS,IBA,TAS,IEA														TAS,IEA			IMP,IBA,TAS,IEA				IBA,TAS,IEA				IBA,TAS,IEA
GO:BP	RNA splicing	GO:0008380	0.0282792	1.54853	459	107	12	18123												IDA,IBA,TAS					IBA,TAS,IC,IEA			IDA,IBA,IEA			IDA,TAS,IEA
GO:BP	nitrogen compound metabolic process	GO:0006807	0.0292777	1.53346	10148	107	81	18123	IBA,TAS,IEA	IBA,TAS,IEA	IBA,TAS,IEA	IDA,IMP,TAS,IEA		IBA,TAS,IEA	IDA,IBA				IDA,IBA,NAS	IDA,IBA,TAS,IEA		ISS,IBA,TAS,IEA	IDA,IMP,ISS,TAS,IEA		IBA,TAS,IC,IEA	IMP,IBA,TAS,IEA		IDA,IBA,TAS,IEA		IDA	IDA,TAS,IEA	IEA	IDA	IEA		IDA,IBA,TAS,IEA			IMP,IBA,TAS,IEA	IDA,IMP,ISS,IBA,TAS,IEA	IDA,IMP,IBA,IEA	IDA,TAS,IEA	IBA,TAS,IEA		IBA		IBA,TAS,IEA	IDA,IBA	IMP,IBA,IEA
GO:BP	cellular component organization or biogenesis	GO:0071840	0.0348136	1.45825	6880	107	62	18123	TAS	TAS	TAS		IDA,IMP	TAS		IDA,IMP,ISS,IBA,TAS,IEA	IDA,IMP,ISS	IMP,ISS,IBA	IDA,HDA,IBA,IEA		TAS	TAS		IBA,TAS,IEA	IMP			IDA,IBA	IMP,IBA	IDA						TAS	ISS		TAS	ISS		TAS	TAS			IDA,IBA	TAS
GO:BP	activation of immune response	GO:0002253	0.0482242	1.31674	566	107	13	18123	TAS	TAS	TAS			TAS								TAS																	TAS				TAS				TAS
GO:CC	protein-containing complex	GO:0032991	2.74385e-16	15.5616	5541	110	77	18964	IDA,ISS,IBA,TAS,IEA	IDA,ISS,IBA,TAS,IEA	IDA,ISS,IBA,TAS,IEA		IDA,IBA	IDA,ISS,IBA,TAS,IEA		IDA,IMP		ISS,IBA,TAS	IDA,HDA,ISS,IBA,IEA	IDA,IBA	IBA	IDA,ISS,IBA,TAS,IEA		ISS,IBA	IDA,IEA	IDA,IBA,IEA				IDA,IEA	IDA,IBA,IEA	TAS		IDA,IBA,IEA		IDA,IBA,IEA			IDA,ISS,IBA,TAS,NAS,IEA			IDA,IBA,IEA	IDA,ISS,IBA,TAS,IEA		IBA		IDA,ISS,IBA,TAS,IEA		IDA,IEA
GO:CC	proteasome core complex	GO:0005839	1.18191e-12	11.9274	23	110	9	18964	ISS,IBA,IEA	ISS,IBA,IEA	ISS,IBA,IEA			ISS,IBA,IEA								ISS,IBA,IEA																	IDA,ISS,IBA,TAS,NAS,IEA				IDA,ISS,IBA,IEA				IDA,ISS,IBA,IEA
GO:CC	proteasome complex	GO:0000502	4.27104e-11	10.3695	67	110	11	18964	IDA,ISS,IBA,TAS,IEA	IDA,ISS,IBA,TAS,IEA	IDA,ISS,IBA,TAS,IEA			IDA,ISS,IBA,TAS,IEA								IDA,ISS,IBA,TAS,IEA																	IDA,ISS,IBA,TAS,NAS,IEA				IDA,ISS,IBA,TAS,IEA				IDA,ISS,IBA,TAS,IEA
GO:CC	intracellular protein-containing complex	GO:0140535	5.63088e-11	10.2494	768	110	26	18964	IDA,ISS,IBA,TAS,IEA	IDA,ISS,IBA,TAS,IEA	IDA,ISS,IBA,TAS,IEA			IDA,ISS,IBA,TAS,IEA						IDA,IBA		IDA,ISS,IBA,TAS,IEA				IDA,IBA,IEA								IEA		IDA,IBA,IEA			IDA,ISS,IBA,TAS,NAS,IEA				IDA,ISS,IBA,TAS,IEA		IBA		IDA,ISS,IBA,TAS,IEA
GO:CC	endopeptidase complex	GO:1905369	1.1491e-10	9.93964	73	110	11	18964	IDA,ISS,IBA,TAS,IEA	IDA,ISS,IBA,TAS,IEA	IDA,ISS,IBA,TAS,IEA			IDA,ISS,IBA,TAS,IEA								IDA,ISS,IBA,TAS,IEA																	IDA,ISS,IBA,TAS,NAS,IEA				IDA,ISS,IBA,TAS,IEA				IDA,ISS,IBA,TAS,IEA
GO:CC	nuclear lumen	GO:0031981	1.3619e-10	9.86585	4453	110	61	18964	IDA,TAS	TAS	IDA,TAS			IDA,TAS		IDA,TAS,IEA	IDA		IDA,TAS	TAS		TAS	IDA		IDA,TAS,IEA		IDA	IDA			TAS	IDA				TAS			IDA,ISS,TAS,IEA	IDA,TAS,IEA	TAS	IDA,TAS	IDA,TAS	IDA		IDA	TAS
GO:CC	nucleoplasm	GO:0005654	2.53483e-10	9.59605	4112	110	58	18964	IDA,TAS	TAS	IDA,TAS			IDA,TAS		IDA,TAS,IEA	IDA		IDA,TAS	TAS		TAS			IDA,TAS,IEA		IDA	IDA			TAS	IDA				TAS			IDA,TAS	IDA,TAS,IEA	TAS	IDA,TAS	IDA,TAS	IDA		IDA	TAS
GO:CC	nucleus	GO:0005634	1.06957e-09	8.97079	7607	110	80	18964	IDA,HDA,IBA,TAS,IEA	HDA,IBA,TAS,IEA	IDA,HDA,IBA,TAS,IEA			IDA,HDA,IBA,TAS,IEA	IEA	IDA,TAS,IEA	IDA,IEA		IDA,ISS,IBA,TAS,IEA	TAS		HDA,IBA,TAS,IEA	IDA,IBA		IDA,IBA,TAS,IEA	IEA	IDA,IBA,IEA	IDA,IEA			IDA,IBA,TAS,IEA	IDA,IBA,IEA	IDA,IBA,NAS,IEA	IDA,IBA,IEA		IDA,IBA,TAS,IEA			IDA,HDA,ISS,IBA,TAS,IEA	IDA,HDA,IBA,TAS,IEA	IDA,IBA,TAS,IEA	IDA,IBA,TAS,IEA	IDA,HDA,IBA,TAS,IEA	IDA,IEA	IDA,IEA	IDA	HDA,IBA,TAS,IEA
GO:CC	organelle lumen	GO:0043233	1.89581e-09	8.72221	5579	110	67	18964	IDA,TAS	TAS	IDA,TAS			IDA,TAS		IDA,TAS,IEA	IDA		IDA,TAS	TAS		TAS	IDA		IDA,TAS,IEA		IDA	IDA			TAS	IDA				TAS			IDA,ISS,TAS,IEA	IDA,TAS,IEA	TAS	IDA,TAS	IDA,TAS	IDA		IDA	TAS
GO:CC	membrane-enclosed lumen	GO:0031974	1.89581e-09	8.72221	5579	110	67	18964	IDA,TAS	TAS	IDA,TAS			IDA,TAS		IDA,TAS,IEA	IDA		IDA,TAS	TAS		TAS	IDA		IDA,TAS,IEA		IDA	IDA			TAS	IDA				TAS			IDA,ISS,TAS,IEA	IDA,TAS,IEA	TAS	IDA,TAS	IDA,TAS	IDA		IDA	TAS
GO:CC	intracellular organelle lumen	GO:0070013	1.89581e-09	8.72221	5579	110	67	18964	IDA,TAS	TAS	IDA,TAS			IDA,TAS		IDA,TAS,IEA	IDA		IDA,TAS	TAS		TAS	IDA		IDA,TAS,IEA		IDA	IDA			TAS	IDA				TAS			IDA,ISS,TAS,IEA	IDA,TAS,IEA	TAS	IDA,TAS	IDA,TAS	IDA		IDA	TAS
GO:CC	proteasome core complex, alpha-subunit complex	GO:0019773	1.98774e-09	8.70164	10	110	6	18964						ISS,IBA,IEA								ISS,IBA,IEA																	IDA,ISS,IBA,TAS,IEA				IDA,ISS,IBA,IEA				IDA,ISS,IBA,IEA
GO:CC	peptidase complex	GO:1905368	2.86219e-09	8.5433	97	110	11	18964	IDA,ISS,IBA,TAS,IEA	IDA,ISS,IBA,TAS,IEA	IDA,ISS,IBA,TAS,IEA			IDA,ISS,IBA,TAS,IEA								IDA,ISS,IBA,TAS,IEA																	IDA,ISS,IBA,TAS,NAS,IEA				IDA,ISS,IBA,TAS,IEA				IDA,ISS,IBA,TAS,IEA
GO:CC	intracellular anatomical structure	GO:0005622	1.2989e-08	7.88643	14808	110	109	18964	IDA,HDA,ISS,IBA,TAS,IEA	HDA,ISS,IBA,TAS,IEA	IDA,HDA,ISS,IBA,TAS,IEA	ISS,IBA,TAS,IEA	IDA,IBA,IEA	IDA,HDA,ISS,IBA,TAS,IEA	IEA	IDA,IMP,ISS,IBA,TAS,IEA	IDA,ISS,IBA,TAS,IEA	IDA,ISS,IBA,TAS,IEA	IDA,HDA,ISS,IBA,TAS,IEA	TAS	IBA,TAS,IEA	HDA,ISS,IBA,TAS,IEA	IDA,ISS,IBA,TAS,IEA	IDA,ISS,IBA,TAS,IEA	IDA,ISS,IBA,TAS,IEA	ISS,IBA,TAS,IEA	IDA,IBA,IEA	IDA,IEA	IDA,IBA,IEA	IBA	IDA,IBA,TAS,IEA	IDA,IBA,IEA	IDA,IBA,NAS,IEA	IDA,IBA,IEA		IDA,IBA,TAS,IEA	TAS	IEA	IDA,HDA,ISS,IBA,TAS,NAS,IEA	IDA,HDA,IBA,TAS,IEA	IDA,IGI,ISA,IBA,TAS,IEA	IDA,IBA,TAS,IEA	IDA,HDA,ISS,IBA,TAS,IEA	IDA,IEA	IDA,IBA,IEA	IDA,IBA,IEA	IDA,HDA,ISS,IBA,TAS,IEA	IEA	IDA,IEA
GO:CC	cytosol	GO:0005829	1.3991e-08	7.85415	5361	110	64	18964	TAS	TAS	TAS	ISS,IBA,TAS,IEA		TAS		IDA,TAS,IEA	IDA,ISS,TAS	IEA			TAS	TAS	IDA,ISS,IBA,TAS,IEA	IEA		TAS	IDA		IDA		TAS					TAS	TAS		TAS		IDA,TAS	TAS	IDA,TAS		IDA	IDA,IBA,IEA	TAS
GO:CC	ribonucleoprotein complex	GO:1990904	1.91352e-08	7.71817	694	110	22	18964						TAS											IDA,IEA						IDA,IBA,IEA								IDA
GO:CC	catalytic complex	GO:1902494	9.27755e-07	6.03257	1377	110	28	18964	IDA,ISS,IBA,TAS,IEA	IDA,ISS,IBA,TAS,IEA	IDA,ISS,IBA,TAS,IEA			IDA,ISS,IBA,TAS,IEA								IDA,ISS,IBA,TAS,IEA			IDA						IBA			IEA		IDA,IBA,IEA			IDA,ISS,IBA,TAS,NAS,IEA				IDA,ISS,IBA,TAS,IEA		IBA		IDA,ISS,IBA,TAS,IEA		IDA,IEA
GO:CC	intracellular membrane-bounded organelle	GO:0043231	1.41457e-06	5.84938	12046	110	97	18964	IDA,HDA,IBA,TAS,IEA	HDA,IBA,TAS,IEA	IDA,HDA,IBA,TAS,IEA		IDA,IBA,IEA	IDA,HDA,IBA,TAS,IEA	IEA	IDA,TAS,IEA	IDA,ISS,IEA	IDA,ISS,IBA,TAS,IEA	IDA,ISS,IBA,TAS,IEA	TAS	IBA,IEA	HDA,IBA,TAS,IEA	IDA,IBA	IDA,IBA,TAS,IEA	IDA,IBA,TAS,IEA	IEA	IDA,IBA,IEA	IDA,IEA	IDA,IBA,IEA		IDA,IBA,TAS,IEA	IDA,IBA,IEA	IDA,IBA,NAS,IEA	IDA,IBA,IEA		IDA,IBA,TAS,IEA		IEA	IDA,HDA,ISS,IBA,TAS,IEA	IDA,HDA,IBA,TAS,IEA	IDA,IBA,TAS,IEA	IDA,IBA,TAS,IEA	IDA,HDA,IBA,TAS,IEA	IDA,IEA	IDA,IEA	IDA	HDA,IBA,TAS,IEA	IEA	IDA,IEA
GO:CC	intracellular organelle	GO:0043229	2.63711e-06	5.57887	13117	110	101	18964	IDA,HDA,IBA,TAS,IEA	HDA,IBA,TAS,IEA	IDA,HDA,IBA,TAS,IEA		IDA,IBA,IEA	IDA,HDA,IBA,TAS,IEA	IEA	IDA,IMP,IBA,TAS,IEA	IDA,ISS,IEA	IDA,ISS,IBA,TAS,IEA	IDA,HDA,ISS,IBA,TAS,IEA	TAS	IBA,IEA	HDA,ISS,IBA,TAS,IEA	IDA,IBA	IDA,IBA,TAS,IEA	IDA,ISS,IBA,TAS,IEA	ISS,IBA,IEA	IDA,IBA,IEA	IDA,IEA	IDA,IBA,IEA		IDA,IBA,TAS,IEA	IDA,IBA,IEA	IDA,IBA,NAS,IEA	IDA,IBA,IEA		IDA,IBA,TAS,IEA		IEA	IDA,HDA,ISS,IBA,TAS,IEA	IDA,HDA,IBA,TAS,IEA	IDA,ISA,IBA,TAS,IEA	IDA,IBA,TAS,IEA	IDA,HDA,ISS,IBA,TAS,IEA	IDA,IEA	IDA,IEA	IDA	HDA,IBA,TAS,IEA	IEA	IDA,IEA
GO:CC	Lsm2-8 complex	GO:0120115	1.07576e-05	4.96829	7	110	4	18964																							IDA
GO:CC	cytoplasm	GO:0005737	1.26281e-05	4.89866	11951	110	95	18964	IBA,TAS,IEA	IBA,TAS,IEA	IBA,TAS,IEA	ISS,IBA,TAS,IEA	IDA,IBA,IEA	IBA,TAS,IEA	IEA	IDA,ISS,TAS,IEA	IDA,ISS,IBA,TAS,IEA	IDA,ISS,IBA,TAS,IEA			IBA,TAS,IEA	ISS,IBA,TAS,IEA	IDA,ISS,IBA,TAS,IEA	IDA,ISS,IBA,TAS,IEA	ISS,IBA,TAS,IEA	ISS,IBA,TAS,IEA	IDA,IEA		IDA,IBA,IEA	IBA	TAS	IDA,IEA	IDA,IBA			TAS,IEA	TAS	IEA	ISS,IBA,TAS,IEA	IDA,IEA	IDA,IGI,TAS,IEA	TAS,IEA	IDA,ISS,IBA,TAS,IEA	IEA	IDA,IBA,IEA	IDA,IBA,IEA	IBA,TAS,IEA	IEA	IDA,IEA
GO:CC	P-body	GO:0000932	1.9484e-05	4.71032	93	110	8	18964														ISS,IEA				ISS,IBA,IEA													ISS,IEA				ISS,IEA
GO:CC	membrane-bounded organelle	GO:0043227	2.03059e-05	4.69238	13201	110	100	18964	IDA,HDA,IBA,TAS,IEA	HDA,IBA,TAS,IEA	IDA,HDA,IBA,TAS,IEA		IDA,IBA,IEA	IDA,HDA,IBA,TAS,IEA	IEA	IDA,HDA,TAS,IEA	IDA,ISS,IEA	IDA,ISS,IBA,TAS,IEA	IDA,ISS,IBA,TAS,IEA	TAS	IBA,IEA	HDA,IBA,TAS,IEA	IDA,IBA	IDA,IBA,TAS,IEA	IDA,HDA,IBA,TAS,IEA	IEA	IDA,IBA,IEA	IDA,IEA	IDA,IBA,IEA		IDA,IBA,TAS,IEA	IDA,IBA,IEA	IDA,IBA,NAS,IEA	IDA,IBA,IEA		IDA,IBA,TAS,IEA		IEA	IDA,HDA,ISS,IBA,TAS,IEA	IDA,HDA,IBA,TAS,IEA	IDA,IBA,TAS,IEA	IDA,IBA,TAS,IEA	IDA,HDA,IBA,TAS,IEA	IDA,IEA	IDA,IEA	IDA	HDA,IBA,TAS,IEA	IEA	IDA,IEA
GO:CC	U6 snRNP	GO:0005688	2.1419e-05	4.6692	8	110	4	18964																							IBA
GO:CC	nuclear protein-containing complex	GO:0140513	3.74647e-05	4.42638	1236	110	24	18964											IDA,ISS,IBA,IEA						IDA,IEA						IDA,IBA,IEA			IDA,IBA,IEA		IDA,IBA,IEA						IDA,IBA,IEA
GO:CC	organelle	GO:0043226	0.000131932	3.87965	14027	110	102	18964	IDA,HDA,IBA,TAS,IEA	HDA,IBA,TAS,IEA	IDA,HDA,IBA,TAS,IEA		IDA,IBA,IEA	IDA,HDA,IBA,TAS,IEA	IEA	IDA,IMP,HDA,IBA,TAS,IEA	IDA,ISS,IEA	IDA,ISS,IBA,TAS,IEA	IDA,HDA,ISS,IBA,TAS,IEA	TAS	IBA,IEA	HDA,ISS,IBA,TAS,IEA	IDA,IBA	IDA,IBA,TAS,IEA	IDA,HDA,ISS,IBA,TAS,IEA	ISS,IBA,IEA	IDA,IBA,IEA	IDA,IEA	IDA,IBA,IEA		IDA,IBA,TAS,IEA	IDA,IBA,IEA	IDA,IBA,NAS,IEA	IDA,IBA,IEA		IDA,IBA,TAS,IEA		IEA	IDA,HDA,ISS,IBA,TAS,IEA	IDA,HDA,IBA,TAS,IEA	IDA,ISA,IBA,TAS,IEA	IDA,IBA,TAS,IEA	IDA,HDA,ISS,IBA,TAS,IEA	IDA,IEA	IDA,IEA	IDA	HDA,IBA,TAS,IEA	IEA	IDA,IEA
GO:CC	cytoplasmic ribonucleoprotein granule	GO:0036464	0.000365171	3.4375	238	110	10	18964														ISS,IEA			ISS,IEA	ISS,IBA,IEA													ISS,IEA				ISS,IEA
GO:CC	ribonucleoprotein granule	GO:0035770	0.000611161	3.21384	252	110	10	18964														ISS,IEA			ISS,IEA	ISS,IBA,IEA													ISS,IEA				ISS,IEA
GO:CC	prefoldin complex	GO:0016272	0.00189962	2.72133	7	110	3	18964																						IDA,IEA
GO:CC	proteasome core complex, beta-subunit complex	GO:0019774	0.00880489	2.05528	11	110	3	18964	ISS	ISS,IEA	ISS
GO:CC	spliceosomal tri-snRNP complex	GO:0097526	0.00988333	2.0051	32	110	4	18964																							IDA,IBA
GO:CC	U4/U6 x U5 tri-snRNP complex	GO:0046540	0.00988333	2.0051	32	110	4	18964																							IDA
GO:CC	polysome	GO:0005844	0.0178904	1.74738	72	110	5	18964						TAS																									IDA
GO:CC	CCR4-NOT complex	GO:0030014	0.0292577	1.53376	16	110	3	18964																		IDA,IBA,IEA
GO:CC	mediator complex	GO:0016592	0.0294209	1.53134	42	110	4	18964																										IDA,IBA,IEA
GO:CC	ribosomal subunit	GO:0044391	0.0363446	1.43956	191	110	7	18964
GO:CC	mitochondrial ribosome	GO:0005761	0.0465425	1.33215	88	110	5	18964
GO:CC	organellar ribosome	GO:0000313	0.0465425	1.33215	88	110	5	18964
KEGG	Proteasome	KEGG:03050	1.37374e-12	11.8621	46	60	11	8000	KEGG	KEGG	KEGG			KEGG								KEGG																	KEGG				KEGG				KEGG
KEGG	Spinocerebellar ataxia	KEGG:05017	4.76104e-07	6.3223	142	60	11	8000	KEGG	KEGG	KEGG			KEGG								KEGG																	KEGG				KEGG				KEGG
KEGG	Prion disease	KEGG:05020	6.91495e-07	6.16021	273	60	14	8000	KEGG	KEGG	KEGG			KEGG								KEGG																	KEGG				KEGG				KEGG
KEGG	Parkinson disease	KEGG:05012	2.06816e-06	5.68442	249	60	13	8000	KEGG	KEGG	KEGG			KEGG								KEGG																	KEGG				KEGG				KEGG
KEGG	Amyotrophic lateral sclerosis	KEGG:05014	3.43422e-06	5.46417	363	60	15	8000	KEGG	KEGG	KEGG			KEGG								KEGG																	KEGG				KEGG				KEGG
KEGG	Huntington disease	KEGG:05016	2.32675e-05	4.63325	306	60	13	8000	KEGG	KEGG	KEGG			KEGG								KEGG																	KEGG				KEGG				KEGG
KEGG	Alzheimer disease	KEGG:05010	3.01676e-05	4.52046	369	60	14	8000	KEGG	KEGG	KEGG			KEGG								KEGG																	KEGG				KEGG				KEGG
KEGG	RNA degradation	KEGG:03018	0.0001388	3.85761	79	60	7	8000																		KEGG					KEGG									KEGG
KEGG	Pathways of neurodegeneration - multiple diseases	KEGG:05022	0.000605144	3.21814	475	60	14	8000	KEGG	KEGG	KEGG			KEGG								KEGG																	KEGG				KEGG				KEGG
KEGG	Spliceosome	KEGG:03040	0.0011116	2.95405	150	60	8	8000																	KEGG						KEGG
REAC	Metabolism of RNA	REAC:R-HSA-8953854	4.53841e-13	12.3431	662	85	30	10622	REAC	REAC	REAC			REAC						REAC		REAC			REAC	REAC					REAC								REAC				REAC				REAC
REAC	Vif-mediated degradation of APOBEC3G	REAC:R-HSA-180585	2.4473e-12	11.6113	53	85	12	10622	REAC	REAC	REAC			REAC								REAC																	REAC				REAC				REAC
REAC	Regulation of RUNX3 expression and activity	REAC:R-HSA-8941858	3.12651e-12	11.5049	54	85	12	10622	REAC	REAC	REAC			REAC								REAC																	REAC				REAC				REAC
REAC	Mitotic Anaphase	REAC:R-HSA-68882	4.46273e-12	11.3504	228	85	19	10622	REAC	REAC	REAC			REAC								REAC														REAC			REAC				REAC				REAC
REAC	Mitotic Metaphase and Anaphase	REAC:R-HSA-2555396	4.83727e-12	11.3154	229	85	19	10622	REAC	REAC	REAC			REAC								REAC														REAC			REAC				REAC				REAC
REAC	The role of GTSE1 in G2/M progression after G2 checkpoint	REAC:R-HSA-8852276	1.42445e-11	10.8464	79	85	13	10622	REAC	REAC	REAC			REAC								REAC																	REAC				REAC				REAC
REAC	Autodegradation of Cdh1 by Cdh1:APC/C	REAC:R-HSA-174084	2.80837e-11	10.5515	64	85	12	10622	REAC	REAC	REAC			REAC								REAC														REAC			REAC				REAC				REAC
REAC	Separation of Sister Chromatids	REAC:R-HSA-2467813	3.43408e-11	10.4642	188	85	17	10622	REAC	REAC	REAC			REAC								REAC														REAC			REAC				REAC				REAC
REAC	Oxygen-dependent proline hydroxylation of Hypoxia-inducible Factor Alpha	REAC:R-HSA-1234176	4.15618e-11	10.3813	66	85	12	10622	REAC	REAC	REAC			REAC								REAC																	REAC				REAC				REAC
REAC	Regulation of mRNA stability by proteins that bind AU-rich elements	REAC:R-HSA-450531	4.49341e-11	10.3474	86	85	13	10622	REAC	REAC	REAC			REAC								REAC																	REAC				REAC				REAC
REAC	Regulation of activated PAK-2p34 by proteasome mediated degradation	REAC:R-HSA-211733	4.96863e-11	10.3038	50	85	11	10622	REAC	REAC	REAC			REAC								REAC																	REAC				REAC				REAC
REAC	Cross-presentation of soluble exogenous antigens (endosomes)	REAC:R-HSA-1236978	4.96863e-11	10.3038	50	85	11	10622	REAC	REAC	REAC			REAC								REAC																	REAC				REAC				REAC
REAC	Activation of NF-kappaB in B cells	REAC:R-HSA-1169091	5.03074e-11	10.2984	67	85	12	10622	REAC	REAC	REAC			REAC								REAC																	REAC				REAC				REAC
REAC	APC/C:Cdc20 mediated degradation of Securin	REAC:R-HSA-174154	6.06986e-11	10.2168	68	85	12	10622	REAC	REAC	REAC			REAC								REAC														REAC			REAC				REAC				REAC
REAC	Regulation of ornithine decarboxylase (ODC)	REAC:R-HSA-350562	6.29444e-11	10.201	51	85	11	10622	REAC	REAC	REAC			REAC								REAC																	REAC				REAC				REAC
REAC	Ubiquitin-dependent degradation of Cyclin D	REAC:R-HSA-75815	7.93208e-11	10.1006	52	85	11	10622	REAC	REAC	REAC			REAC								REAC																	REAC				REAC				REAC
REAC	Vpu mediated degradation of CD4	REAC:R-HSA-180534	7.93208e-11	10.1006	52	85	11	10622	REAC	REAC	REAC			REAC								REAC																	REAC				REAC				REAC
REAC	p53-Independent DNA Damage Response	REAC:R-HSA-69610	7.93208e-11	10.1006	52	85	11	10622	REAC	REAC	REAC			REAC								REAC																	REAC				REAC				REAC
REAC	Autodegradation of the E3 ubiquitin ligase COP1	REAC:R-HSA-349425	7.93208e-11	10.1006	52	85	11	10622	REAC	REAC	REAC			REAC								REAC																	REAC				REAC				REAC
REAC	p53-Independent G1/S DNA damage checkpoint	REAC:R-HSA-69613	7.93208e-11	10.1006	52	85	11	10622	REAC	REAC	REAC			REAC								REAC																	REAC				REAC				REAC
REAC	Ubiquitin Mediated Degradation of Phosphorylated Cdc25A	REAC:R-HSA-69601	7.93208e-11	10.1006	52	85	11	10622	REAC	REAC	REAC			REAC								REAC																	REAC				REAC				REAC
REAC	Neddylation	REAC:R-HSA-8951664	9.10494e-11	10.0407	233	85	18	10622	REAC	REAC	REAC			REAC	REAC							REAC					REAC												REAC			REAC	REAC	REAC			REAC	REAC
REAC	Negative regulation of NOTCH4 signaling	REAC:R-HSA-9604323	9.94543e-11	10.0024	53	85	11	10622	REAC	REAC	REAC			REAC								REAC																	REAC				REAC				REAC
REAC	Regulation of Apoptosis	REAC:R-HSA-169911	9.94543e-11	10.0024	53	85	11	10622	REAC	REAC	REAC			REAC								REAC																	REAC				REAC				REAC
REAC	Regulation of RUNX2 expression and activity	REAC:R-HSA-8939902	1.0469e-10	9.98009	71	85	12	10622	REAC	REAC	REAC			REAC								REAC																	REAC				REAC				REAC
REAC	AUF1 (hnRNP D0) binds and destabilizes mRNA	REAC:R-HSA-450408	1.24096e-10	9.90624	54	85	11	10622	REAC	REAC	REAC			REAC								REAC																	REAC				REAC				REAC
REAC	CDK-mediated phosphorylation and removal of Cdc6	REAC:R-HSA-69017	1.48433e-10	9.82847	73	85	12	10622	REAC	REAC	REAC			REAC								REAC														REAC			REAC				REAC				REAC
REAC	Cdc20:Phospho-APC/C mediated degradation of Cyclin A	REAC:R-HSA-174184	1.48433e-10	9.82847	73	85	12	10622	REAC	REAC	REAC			REAC								REAC														REAC			REAC				REAC				REAC
REAC	SCF-beta-TrCP mediated degradation of Emi1	REAC:R-HSA-174113	1.54127e-10	9.81212	55	85	11	10622	REAC	REAC	REAC			REAC								REAC																	REAC				REAC				REAC
REAC	Degradation of AXIN	REAC:R-HSA-4641257	1.54127e-10	9.81212	55	85	11	10622	REAC	REAC	REAC			REAC								REAC																	REAC				REAC				REAC
REAC	FBXL7 down-regulates AURKA during mitotic entry and in early mitosis	REAC:R-HSA-8854050	1.54127e-10	9.81212	55	85	11	10622	REAC	REAC	REAC			REAC								REAC																	REAC				REAC				REAC
REAC	APC:Cdc20 mediated degradation of cell cycle proteins prior to satisfation of the cell cycle checkpoint	REAC:R-HSA-179419	1.76033e-10	9.75441	74	85	12	10622	REAC	REAC	REAC			REAC								REAC														REAC			REAC				REAC				REAC
REAC	APC/C:Cdh1 mediated degradation of Cdc20 and other APC/C:Cdh1 targeted proteins in late mitosis/early G1	REAC:R-HSA-174178	1.76033e-10	9.75441	74	85	12	10622	REAC	REAC	REAC			REAC								REAC														REAC			REAC				REAC				REAC
REAC	Hh mutants are degraded by ERAD	REAC:R-HSA-5362768	1.90574e-10	9.71994	56	85	11	10622	REAC	REAC	REAC			REAC								REAC																	REAC				REAC				REAC
REAC	Cellular response to hypoxia	REAC:R-HSA-1234174	2.08228e-10	9.68146	75	85	12	10622	REAC	REAC	REAC			REAC								REAC																	REAC				REAC				REAC
REAC	Degradation of DVL	REAC:R-HSA-4641258	2.34634e-10	9.62961	57	85	11	10622	REAC	REAC	REAC			REAC								REAC																	REAC				REAC				REAC
REAC	Stabilization of p53	REAC:R-HSA-69541	2.34634e-10	9.62961	57	85	11	10622	REAC	REAC	REAC			REAC								REAC																	REAC				REAC				REAC
REAC	APC/C:Cdc20 mediated degradation of mitotic proteins	REAC:R-HSA-176409	2.45696e-10	9.6096	76	85	12	10622	REAC	REAC	REAC			REAC								REAC														REAC			REAC				REAC				REAC
REAC	Metabolism of polyamines	REAC:R-HSA-351202	2.87694e-10	9.54107	58	85	11	10622	REAC	REAC	REAC			REAC								REAC																	REAC				REAC				REAC
REAC	Activation of APC/C and APC/C:Cdc20 mediated degradation of mitotic proteins	REAC:R-HSA-176814	2.89201e-10	9.5388	77	85	12	10622	REAC	REAC	REAC			REAC								REAC														REAC			REAC				REAC				REAC
REAC	Host Interactions of HIV factors	REAC:R-HSA-162909	3.39158e-10	9.4696	125	85	14	10622	REAC	REAC	REAC			REAC								REAC																	REAC				REAC				REAC
REAC	NIK-->noncanonical NF-kB signaling	REAC:R-HSA-5676590	3.51358e-10	9.45425	59	85	11	10622	REAC	REAC	REAC			REAC								REAC																	REAC				REAC				REAC
REAC	CDT1 association with the CDC6:ORC:origin complex	REAC:R-HSA-68827	3.51358e-10	9.45425	59	85	11	10622	REAC	REAC	REAC			REAC								REAC																	REAC				REAC				REAC
REAC	Hh mutants abrogate ligand secretion	REAC:R-HSA-5387390	3.51358e-10	9.45425	59	85	11	10622	REAC	REAC	REAC			REAC								REAC																	REAC				REAC				REAC
REAC	Degradation of GLI1 by the proteasome	REAC:R-HSA-5610780	4.27479e-10	9.36909	60	85	11	10622	REAC	REAC	REAC			REAC								REAC																	REAC				REAC				REAC
REAC	SCF(Skp2)-mediated degradation of p27/p21	REAC:R-HSA-187577	4.27479e-10	9.36909	60	85	11	10622	REAC	REAC	REAC			REAC								REAC																	REAC				REAC				REAC
REAC	Dectin-1 mediated noncanonical NF-kB signaling	REAC:R-HSA-5607761	4.27479e-10	9.36909	60	85	11	10622	REAC	REAC	REAC			REAC								REAC																	REAC				REAC				REAC
REAC	GLI3 is processed to GLI3R by the proteasome	REAC:R-HSA-5610785	4.27479e-10	9.36909	60	85	11	10622	REAC	REAC	REAC			REAC								REAC																	REAC				REAC				REAC
REAC	Degradation of GLI2 by the proteasome	REAC:R-HSA-5610783	4.27479e-10	9.36909	60	85	11	10622	REAC	REAC	REAC			REAC								REAC																	REAC				REAC				REAC
REAC	Downstream signaling events of B Cell Receptor (BCR)	REAC:R-HSA-1168372	4.6511e-10	9.33244	80	85	12	10622	REAC	REAC	REAC			REAC								REAC																	REAC				REAC				REAC
REAC	Defective CFTR causes cystic fibrosis	REAC:R-HSA-5678895	5.18184e-10	9.28552	61	85	11	10622	REAC	REAC	REAC			REAC								REAC																	REAC				REAC				REAC
REAC	Regulation of APC/C activators between G1/S and early anaphase	REAC:R-HSA-176408	5.4252e-10	9.26558	81	85	12	10622	REAC	REAC	REAC			REAC								REAC														REAC			REAC				REAC				REAC
REAC	ER-Phagosome pathway	REAC:R-HSA-1236974	7.33497e-10	9.1346	83	85	12	10622	REAC	REAC	REAC			REAC							REAC	REAC																	REAC				REAC				REAC
REAC	Asymmetric localization of PCP proteins	REAC:R-HSA-4608870	9.0401e-10	9.04383	64	85	11	10622	REAC	REAC	REAC			REAC								REAC																	REAC				REAC				REAC
REAC	Hedgehog ligand biogenesis	REAC:R-HSA-5358346	1.08119e-09	8.9661	65	85	11	10622	REAC	REAC	REAC			REAC								REAC																	REAC				REAC				REAC
REAC	p53-Dependent G1 DNA Damage Response	REAC:R-HSA-69563	1.28911e-09	8.88971	66	85	11	10622	REAC	REAC	REAC			REAC								REAC																	REAC				REAC				REAC
REAC	p53-Dependent G1/S DNA damage checkpoint	REAC:R-HSA-69580	1.28911e-09	8.88971	66	85	11	10622	REAC	REAC	REAC			REAC								REAC																	REAC				REAC				REAC
REAC	Regulation of mitotic cell cycle	REAC:R-HSA-453276	1.50644e-09	8.82205	88	85	12	10622	REAC	REAC	REAC			REAC								REAC														REAC			REAC				REAC				REAC
REAC	APC/C-mediated degradation of cell cycle proteins	REAC:R-HSA-174143	1.50644e-09	8.82205	88	85	12	10622	REAC	REAC	REAC			REAC								REAC														REAC			REAC				REAC				REAC
REAC	Regulation of RAS by GAPs	REAC:R-HSA-5658442	1.53245e-09	8.81461	67	85	11	10622	REAC	REAC	REAC			REAC								REAC																	REAC				REAC				REAC
REAC	MAPK6/MAPK4 signaling	REAC:R-HSA-5687128	1.73011e-09	8.76193	89	85	12	10622	REAC	REAC	REAC			REAC								REAC																	REAC				REAC				REAC
REAC	Regulation of expression of SLITs and ROBOs	REAC:R-HSA-9010553	1.78784e-09	8.74767	171	85	15	10622	REAC	REAC	REAC			REAC								REAC																	REAC				REAC				REAC
REAC	G1/S DNA Damage Checkpoints	REAC:R-HSA-69615	1.81647e-09	8.74077	68	85	11	10622	REAC	REAC	REAC			REAC								REAC																	REAC				REAC				REAC
REAC	Assembly of the pre-replicative complex	REAC:R-HSA-68867	1.81647e-09	8.74077	68	85	11	10622	REAC	REAC	REAC			REAC								REAC																	REAC				REAC				REAC
REAC	M Phase	REAC:R-HSA-68886	1.88215e-09	8.72535	407	85	21	10622	REAC	REAC	REAC			REAC		REAC						REAC														REAC			REAC				REAC				REAC
REAC	Regulation of PTEN stability and activity	REAC:R-HSA-8948751	2.14713e-09	8.66814	69	85	11	10622	REAC	REAC	REAC			REAC								REAC																	REAC				REAC				REAC
REAC	Switching of origins to a post-replicative state	REAC:R-HSA-69052	2.27029e-09	8.64392	91	85	12	10622	REAC	REAC	REAC			REAC								REAC														REAC			REAC				REAC				REAC
REAC	Orc1 removal from chromatin	REAC:R-HSA-68949	2.97597e-09	8.52637	71	85	11	10622	REAC	REAC	REAC			REAC								REAC																	REAC				REAC				REAC
REAC	Transcriptional regulation by RUNX3	REAC:R-HSA-8878159	3.37099e-09	8.47224	94	85	12	10622	REAC	REAC	REAC			REAC								REAC																	REAC				REAC				REAC
REAC	Signaling by ROBO receptors	REAC:R-HSA-376176	4.64919e-09	8.33262	217	85	16	10622	REAC	REAC	REAC			REAC			REAC					REAC																	REAC				REAC				REAC
REAC	CLEC7A (Dectin-1) signaling	REAC:R-HSA-5607764	4.93644e-09	8.30659	97	85	12	10622	REAC	REAC	REAC			REAC								REAC																	REAC				REAC				REAC
REAC	Downstream TCR signaling	REAC:R-HSA-202424	5.58937e-09	8.25264	98	85	12	10622	REAC	REAC	REAC			REAC								REAC																	REAC				REAC				REAC
REAC	Antigen processing-Cross presentation	REAC:R-HSA-1236975	6.31976e-09	8.1993	99	85	12	10622	REAC	REAC	REAC			REAC							REAC	REAC																	REAC				REAC				REAC
REAC	ABC transporter disorders	REAC:R-HSA-5619084	7.47184e-09	8.12657	77	85	11	10622	REAC	REAC	REAC			REAC								REAC																	REAC				REAC				REAC
REAC	Interleukin-1 signaling	REAC:R-HSA-9020702	8.04622e-09	8.09441	101	85	12	10622	REAC	REAC	REAC			REAC								REAC																	REAC				REAC				REAC
REAC	HIV Infection	REAC:R-HSA-162906	8.61899e-09	8.06454	226	85	16	10622	REAC	REAC	REAC			REAC								REAC																	REAC				REAC				REAC
REAC	G2/M Transition	REAC:R-HSA-69275	1.28546e-08	7.89094	196	85	15	10622	REAC	REAC	REAC			REAC								REAC																	REAC				REAC				REAC
REAC	Signaling by NOTCH4	REAC:R-HSA-9013694	1.32136e-08	7.87898	81	85	11	10622	REAC	REAC	REAC			REAC								REAC																	REAC				REAC				REAC
REAC	Mitotic G2-G2/M phases	REAC:R-HSA-453274	1.48667e-08	7.82779	198	85	15	10622	REAC	REAC	REAC			REAC								REAC																	REAC				REAC				REAC
REAC	Cyclin E associated events during G1/S transition	REAC:R-HSA-69202	1.73675e-08	7.76026	83	85	11	10622	REAC	REAC	REAC			REAC								REAC																	REAC				REAC				REAC
REAC	Degradation of beta-catenin by the destruction complex	REAC:R-HSA-195253	1.73675e-08	7.76026	83	85	11	10622	REAC	REAC	REAC			REAC								REAC																	REAC				REAC				REAC
REAC	DNA Replication Pre-Initiation	REAC:R-HSA-69002	2.26617e-08	7.64471	85	85	11	10622	REAC	REAC	REAC			REAC								REAC																	REAC				REAC				REAC
REAC	Hedgehog 'on' state	REAC:R-HSA-5632684	2.26617e-08	7.64471	85	85	11	10622	REAC	REAC	REAC			REAC								REAC																	REAC				REAC				REAC
REAC	Cyclin A:Cdk2-associated events at S phase entry	REAC:R-HSA-69656	2.26617e-08	7.64471	85	85	11	10622	REAC	REAC	REAC			REAC								REAC																	REAC				REAC				REAC
REAC	Hedgehog 'off' state	REAC:R-HSA-5610787	3.089e-08	7.51018	113	85	12	10622	REAC	REAC	REAC			REAC								REAC																	REAC				REAC				REAC
REAC	Transcriptional regulation by RUNX2	REAC:R-HSA-8878166	5.16508e-08	7.28692	118	85	12	10622	REAC	REAC	REAC			REAC								REAC																	REAC				REAC				REAC
REAC	PCP/CE pathway	REAC:R-HSA-4086400	5.45803e-08	7.26296	92	85	11	10622	REAC	REAC	REAC			REAC								REAC																	REAC				REAC				REAC
REAC	TCR signaling	REAC:R-HSA-202403	6.30137e-08	7.20056	120	85	12	10622	REAC	REAC	REAC			REAC								REAC																	REAC				REAC				REAC
REAC	Synthesis of DNA	REAC:R-HSA-69239	6.30137e-08	7.20056	120	85	12	10622	REAC	REAC	REAC			REAC								REAC														REAC			REAC				REAC				REAC
REAC	DNA Replication	REAC:R-HSA-69306	1.34725e-07	6.87055	128	85	12	10622	REAC	REAC	REAC			REAC								REAC														REAC			REAC				REAC				REAC
REAC	TNFR2 non-canonical NF-kB pathway	REAC:R-HSA-5668541	1.36596e-07	6.86456	100	85	11	10622	REAC	REAC	REAC			REAC								REAC																	REAC				REAC				REAC
REAC	UCH proteinases	REAC:R-HSA-5689603	1.52307e-07	6.81728	101	85	11	10622	REAC	REAC	REAC			REAC								REAC																	REAC				REAC				REAC
REAC	RUNX1 regulates transcription of genes involved in differentiation of HSCs	REAC:R-HSA-8939236	1.61566e-07	6.79165	130	85	12	10622	REAC	REAC	REAC			REAC								REAC																	REAC				REAC				REAC
REAC	ABC-family proteins mediated transport	REAC:R-HSA-382556	1.88685e-07	6.72426	103	85	11	10622	REAC	REAC	REAC			REAC								REAC																	REAC				REAC				REAC
REAC	C-type lectin receptors (CLRs)	REAC:R-HSA-5621481	2.73606e-07	6.56287	136	85	12	10622	REAC	REAC	REAC			REAC								REAC																	REAC				REAC				REAC
REAC	FCERI mediated NF-kB activation	REAC:R-HSA-2871837	2.73606e-07	6.56287	136	85	12	10622	REAC	REAC	REAC			REAC								REAC																	REAC				REAC				REAC
REAC	Interleukin-1 family signaling	REAC:R-HSA-446652	3.24249e-07	6.48912	138	85	12	10622	REAC	REAC	REAC			REAC								REAC																	REAC				REAC				REAC
REAC	Cell Cycle Checkpoints	REAC:R-HSA-69620	3.52932e-07	6.45231	290	85	16	10622	REAC	REAC	REAC			REAC								REAC														REAC			REAC				REAC				REAC
REAC	Cell Cycle, Mitotic	REAC:R-HSA-69278	4.95005e-07	6.30539	549	85	21	10622	REAC	REAC	REAC			REAC		REAC						REAC														REAC			REAC				REAC				REAC
REAC	Cell Cycle	REAC:R-HSA-1640170	7.24396e-07	6.14002	679	85	23	10622	REAC	REAC	REAC			REAC		REAC						REAC														REAC			REAC				REAC				REAC
REAC	Signaling by Hedgehog	REAC:R-HSA-5358351	7.87311e-07	6.10385	149	85	12	10622	REAC	REAC	REAC			REAC								REAC																	REAC				REAC				REAC
REAC	S Phase	REAC:R-HSA-69242	2.05174e-06	5.68788	162	85	12	10622	REAC	REAC	REAC			REAC								REAC														REAC			REAC				REAC				REAC
REAC	Signaling by the B Cell Receptor (BCR)	REAC:R-HSA-983705	2.20063e-06	5.65745	163	85	12	10622	REAC	REAC	REAC			REAC								REAC																	REAC				REAC				REAC
REAC	G1/S Transition	REAC:R-HSA-69206	2.5061e-06	5.601	131	85	11	10622	REAC	REAC	REAC			REAC								REAC																	REAC				REAC				REAC
REAC	G2/M Checkpoints	REAC:R-HSA-69481	3.10143e-06	5.50844	168	85	12	10622	REAC	REAC	REAC			REAC								REAC																	REAC				REAC				REAC
REAC	Disorders of transmembrane transporters	REAC:R-HSA-5619115	4.32147e-06	5.36437	173	85	12	10622	REAC	REAC	REAC			REAC								REAC																	REAC				REAC				REAC
REAC	PTEN Regulation	REAC:R-HSA-6807070	4.34364e-06	5.36215	138	85	11	10622	REAC	REAC	REAC			REAC								REAC																	REAC				REAC				REAC
REAC	Metabolism of proteins	REAC:R-HSA-392499	5.02853e-06	5.29856	2016	85	39	10622	REAC	REAC	REAC			REAC	REAC						REAC	REAC		REAC	REAC		REAC			REAC									REAC			REAC	REAC	REAC			REAC	REAC
REAC	Beta-catenin independent WNT signaling	REAC:R-HSA-3858494	6.31329e-06	5.19974	143	85	11	10622	REAC	REAC	REAC			REAC								REAC																	REAC				REAC				REAC
REAC	Fc epsilon receptor (FCERI) signaling	REAC:R-HSA-2454202	7.6455e-06	5.11659	182	85	12	10622	REAC	REAC	REAC			REAC								REAC																	REAC				REAC				REAC
REAC	Cellular responses to stress	REAC:R-HSA-2262752	8.2075e-06	5.08579	582	85	20	10622	REAC	REAC	REAC			REAC								REAC														REAC			REAC				REAC				REAC
REAC	Mitotic G1 phase and G1/S transition	REAC:R-HSA-453279	9.04419e-06	5.04363	148	85	11	10622	REAC	REAC	REAC			REAC								REAC																	REAC				REAC				REAC
REAC	Class I MHC mediated antigen processing & presentation	REAC:R-HSA-983169	1.15577e-05	4.93713	370	85	16	10622	REAC	REAC	REAC			REAC							REAC	REAC														REAC			REAC				REAC				REAC
REAC	Cellular responses to external stimuli	REAC:R-HSA-8953897	1.22157e-05	4.91308	596	85	20	10622	REAC	REAC	REAC			REAC								REAC														REAC			REAC				REAC				REAC
REAC	Transcriptional regulation by RUNX1	REAC:R-HSA-8878171	1.6041e-05	4.79477	236	85	13	10622	REAC	REAC	REAC			REAC					REAC			REAC																	REAC				REAC				REAC
REAC	Apoptosis	REAC:R-HSA-109581	4.80758e-05	4.31807	174	85	11	10622	REAC	REAC	REAC			REAC								REAC																	REAC				REAC				REAC
REAC	Antigen processing: Ubiquitination & Proteasome degradation	REAC:R-HSA-983168	5.09866e-05	4.29254	308	85	14	10622	REAC	REAC	REAC			REAC								REAC														REAC			REAC				REAC				REAC
REAC	Ub-specific processing proteases	REAC:R-HSA-5689880	6.53599e-05	4.18469	221	85	12	10622	REAC	REAC	REAC			REAC								REAC																	REAC				REAC				REAC
REAC	Programmed Cell Death	REAC:R-HSA-5357801	9.46471e-05	4.02389	186	85	11	10622	REAC	REAC	REAC			REAC								REAC																	REAC				REAC				REAC
REAC	Axon guidance	REAC:R-HSA-422475	9.62304e-05	4.01669	549	85	18	10622	REAC	REAC	REAC			REAC			REAC					REAC																	REAC				REAC				REAC
REAC	Deadenylation-dependent mRNA decay	REAC:R-HSA-429914	0.000107084	3.97027	56	85	7	10622																		REAC					REAC
REAC	TCF dependent signaling in response to WNT	REAC:R-HSA-201681	0.000110686	3.95591	232	85	12	10622	REAC	REAC	REAC			REAC								REAC																	REAC				REAC				REAC
REAC	Nervous system development	REAC:R-HSA-9675108	0.000185817	3.73092	574	85	18	10622	REAC	REAC	REAC			REAC			REAC					REAC																	REAC				REAC				REAC
REAC	Developmental Biology	REAC:R-HSA-1266738	0.000447443	3.34926	1116	85	25	10622	REAC	REAC	REAC			REAC			REAC					REAC				REAC								REAC					REAC				REAC				REAC
REAC	Metabolism of amino acids and derivatives	REAC:R-HSA-71291	0.000470783	3.32718	370	85	14	10622	REAC	REAC	REAC			REAC								REAC																	REAC				REAC				REAC
REAC	Infectious disease	REAC:R-HSA-5663205	0.000668667	3.17479	909	85	22	10622	REAC	REAC	REAC			REAC								REAC			REAC														REAC				REAC				REAC
REAC	Signaling by NOTCH	REAC:R-HSA-157118	0.000885782	3.05267	233	85	11	10622	REAC	REAC	REAC			REAC								REAC																	REAC				REAC				REAC
REAC	RNA Polymerase II Transcription	REAC:R-HSA-73857	0.00118157	2.92754	1342	85	27	10622	REAC	REAC	REAC			REAC					REAC			REAC				REAC										REAC			REAC				REAC				REAC
REAC	Deubiquitination	REAC:R-HSA-5688426	0.00150416	2.82271	297	85	12	10622	REAC	REAC	REAC			REAC								REAC																	REAC				REAC				REAC
REAC	mRNA decay by 5' to 3' exoribonuclease	REAC:R-HSA-430039	0.00188932	2.72369	15	85	4	10622																							REAC
REAC	PIP3 activates AKT signaling	REAC:R-HSA-1257604	0.0018898	2.72358	252	85	11	10622	REAC	REAC	REAC			REAC								REAC																	REAC				REAC				REAC
REAC	MAPK family signaling cascades	REAC:R-HSA-5683057	0.00218544	2.66046	308	85	12	10622	REAC	REAC	REAC			REAC								REAC																	REAC				REAC				REAC
REAC	Gene expression (Transcription)	REAC:R-HSA-74160	0.00229482	2.63925	1476	85	28	10622	REAC	REAC	REAC			REAC					REAC			REAC				REAC										REAC			REAC				REAC				REAC
REAC	RAF/MAP kinase cascade	REAC:R-HSA-5673001	0.00294689	2.53064	264	85	11	10622	REAC	REAC	REAC			REAC								REAC																	REAC				REAC				REAC
REAC	MAPK1/MAPK3 signaling	REAC:R-HSA-5684996	0.00352104	2.45333	269	85	11	10622	REAC	REAC	REAC			REAC								REAC																	REAC				REAC				REAC
REAC	Signaling by WNT	REAC:R-HSA-195721	0.00414148	2.38284	328	85	12	10622	REAC	REAC	REAC			REAC								REAC																	REAC				REAC				REAC
REAC	Adaptive Immune System	REAC:R-HSA-1280218	0.00517096	2.28643	799	85	19	10622	REAC	REAC	REAC			REAC							REAC	REAC														REAC			REAC				REAC				REAC
REAC	Intracellular signaling by second messengers	REAC:R-HSA-9006925	0.00760531	2.11888	292	85	11	10622	REAC	REAC	REAC			REAC								REAC																	REAC				REAC				REAC
REAC	Post-translational protein modification	REAC:R-HSA-597592	0.0100167	1.99927	1415	85	26	10622	REAC	REAC	REAC			REAC	REAC							REAC		REAC	REAC		REAC												REAC			REAC	REAC	REAC			REAC	REAC
REAC	Diseases of signal transduction by growth factor receptors and second messengers	REAC:R-HSA-5663202	0.017796	1.74968	380	85	12	10622	REAC	REAC	REAC			REAC								REAC																	REAC				REAC				REAC
REAC	Prefoldin mediated transfer of substrate to CCT/TriC	REAC:R-HSA-389957	0.0261783	1.58206	28	85	4	10622																						REAC
REAC	Translation	REAC:R-HSA-72766	0.0414401	1.38258	292	85	10	10622													REAC
WP	Proteasome Degradation	WP:WP183	2.92126e-11	10.5344	64	51	11	7562	WP	WP	WP			WP								WP																	WP				WP				WP
WP	Cellular Proteostasis	WP:WP4918	0.00121942	2.91385	7	51	3	7562																						WP
WP	Parkin-Ubiquitin Proteasomal System pathway	WP:WP2359	0.0121996	1.91365	70	51	5	7562
TF	Factor: Elf-1; motif: NAMCCGGAAGTN	TF:M11447	1.49286e-10	9.82598	7786	114	84	19917	TF	TF			TF		TF	TF	TF	TF	TF	TF		TF	TF	TF	TF	TF	TF	TF			TF	TF	TF	TF	TF				TF		TF	TF	TF	TF	TF	TF	TF		TF
TF	Factor: Elf-1; motif: NANCCGGAAGTN	TF:M11451	1.80262e-10	9.7441	6956	114	79	19917	TF	TF			TF		TF	TF	TF	TF	TF	TF			TF	TF		TF	TF	TF			TF		TF	TF	TF				TF		TF	TF	TF	TF	TF	TF	TF		TF
TF	Factor: Elk-1; motif: NNNNCCGGAARTNN	TF:M00025	5.12219e-09	8.29054	10355	114	95	19917	TF	TF			TF		TF	TF	TF	TF	TF	TF	TF		TF	TF	TF	TF	TF	TF	TF			TF	TF	TF	TF			TF	TF		TF	TF	TF	TF	TF	TF	TF		TF
TF	Factor: c-Ets-1; motif: NNNRCCGGAWRYNNNN	TF:M01078	1.11597e-08	7.95235	7621	114	80	19917	TF	TF			TF		TF	TF	TF	TF	TF	TF			TF	TF	TF	TF	TF	TF				TF	TF	TF	TF		TF	TF	TF			TF	TF	TF	TF	TF	TF		TF
TF	Factor: SAP-1; motif: NNCCGGAAGTGN	TF:M09905	1.40017e-08	7.85382	8354	114	84	19917	TF	TF			TF			TF	TF	TF	TF	TF	TF		TF	TF	TF	TF	TF	TF	TF			TF	TF	TF	TF			TF	TF		TF	TF		TF	TF	TF	TF		TF
TF	Factor: PEA3; motif: NACCGGAAGTN	TF:M11430	1.97516e-08	7.7044	10973	114	97	19917	TF	TF		TF	TF		TF	TF	TF	TF	TF	TF	TF		TF	TF	TF	TF	TF	TF				TF	TF	TF	TF		TF	TF	TF		TF	TF	TF	TF	TF	TF	TF	TF	TF
TF	Factor: Erm; motif: NNSCGGAWGYN	TF:M11424	2.05074e-08	7.68809	8225	114	83	19917	TF	TF			TF		TF	TF	TF	TF	TF	TF		TF	TF	TF	TF	TF	TF	TF			TF	TF	TF	TF	TF		TF		TF		TF	TF	TF	TF	TF	TF	TF		TF
TF	Factor: c-Ets-2; motif: NCCGGAAGTG	TF:M08759	7.31119e-08	7.13601	8396	114	83	19917	TF	TF			TF			TF	TF	TF	TF	TF			TF	TF	TF	TF	TF	TF				TF	TF	TF	TF		TF		TF			TF	TF	TF	TF	TF	TF		TF
TF	Factor: FLI-1; motif: NAYTTCCGGT	TF:M08913	7.58332e-08	7.12014	8401	114	83	19917	TF	TF			TF			TF	TF	TF	TF	TF	TF		TF	TF	TF	TF	TF	TF				TF	TF	TF	TF			TF	TF		TF	TF		TF	TF	TF	TF		TF
TF	Factor: ERG; motif: ACCGGAART	TF:M01752	9.9993e-08	7.00003	9560	114	89	19917	TF	TF			TF		TF	TF	TF	TF	TF	TF	TF		TF	TF	TF	TF	TF	TF				TF	TF	TF	TF		TF	TF	TF		TF	TF	TF	TF	TF	TF	TF		TF
TF	Factor: nerf; motif: NRRNSCGGAAGNRNNNN	TF:M09606	1.45702e-07	6.83654	6310	114	70	19917	TF	TF	TF	TF	TF		TF	TF		TF	TF	TF				TF		TF	TF	TF			TF	TF	TF	TF	TF						TF		TF	TF	TF	TF	TF
TF	Factor: PEA3; motif: RCCGGAAGYN	TF:M02066	1.59221e-07	6.798	7124	114	75	19917	TF	TF			TF		TF	TF	TF	TF	TF	TF	TF			TF	TF	TF	TF	TF				TF	TF	TF	TF			TF	TF		TF	TF		TF	TF	TF	TF		TF
TF	Factor: ZF5; motif: GGSGCGCGS; match class: 1	TF:M10438_1	1.95251e-07	6.70941	15001	114	111	19917	TF	TF	TF	TF	TF	TF	TF	TF	TF	TF	TF	TF	TF	TF	TF	TF	TF	TF	TF	TF	TF	TF	TF	TF	TF	TF	TF	TF		TF	TF	TF	TF	TF	TF	TF	TF	TF	TF	TF	TF
TF	Factor: PEA3; motif: NACCGGAAGTN	TF:M11425	2.16999e-07	6.66354	7499	114	77	19917	TF	TF			TF		TF	TF	TF	TF	TF	TF				TF	TF	TF	TF	TF			TF	TF	TF	TF	TF		TF	TF	TF			TF		TF	TF	TF	TF		TF
TF	Factor: ELK-1; motif: ACCGGAAGTN	TF:M02059	2.73639e-07	6.56282	9512	114	88	19917	TF	TF			TF		TF	TF	TF	TF	TF	TF	TF		TF	TF	TF	TF	TF	TF		TF		TF	TF	TF	TF			TF	TF		TF	TF	TF	TF	TF	TF	TF		TF
TF	Factor: Elf-1; motif: ACTTCCGGG	TF:M04714	2.80935e-07	6.55139	7876	114	79	19917	TF	TF			TF			TF	TF	TF	TF	TF			TF	TF	TF	TF	TF	TF				TF	TF	TF	TF				TF			TF	TF	TF	TF	TF	TF		TF
TF	Factor: Elk-1; motif: RCCGGAAGTGN	TF:M09904	3.08895e-07	6.51019	8239	114	81	19917	TF	TF			TF			TF	TF	TF	TF	TF			TF	TF	TF	TF	TF	TF				TF	TF	TF	TF				TF			TF	TF	TF	TF	TF	TF		TF
TF	Factor: Elf-1; motif: NANSCGGAAGTR	TF:M11450	3.10979e-07	6.50727	5640	114	65	19917	TF	TF			TF	TF	TF			TF	TF	TF				TF			TF				TF		TF	TF	TF				TF		TF		TF	TF	TF	TF	TF
TF	Factor: nerf; motif: NNNCCGGAAGTGN	TF:M09901	5.28321e-07	6.2771	5408	114	63	19917	TF	TF			TF			TF		TF	TF	TF				TF		TF	TF					TF	TF	TF	TF				TF					TF	TF	TF	TF
TF	Factor: Erg; motif: NACCGGAARTN	TF:M11396	7.31987e-07	6.1355	10863	114	94	19917	TF	TF			TF		TF	TF	TF	TF	TF	TF	TF		TF	TF	TF	TF	TF	TF	TF			TF	TF	TF	TF		TF	TF	TF		TF	TF		TF	TF	TF	TF		TF
TF	Factor: c-ets-1; motif: ACCGGAWGTN	TF:M02063	8.45135e-07	6.07307	7686	114	77	19917	TF	TF			TF		TF	TF	TF	TF	TF	TF			TF	TF	TF	TF	TF	TF				TF	TF	TF	TF		TF	TF	TF			TF	TF	TF	TF	TF	TF		TF
TF	Factor: PEA3; motif: NACCGGAAGTN	TF:M11427	9.14957e-07	6.0386	10689	114	93	19917	TF	TF		TF	TF		TF	TF	TF	TF	TF	TF	TF		TF	TF	TF	TF	TF	TF				TF	TF	TF	TF		TF	TF	TF			TF	TF	TF	TF	TF	TF	TF	TF
TF	Factor: Elk-1; motif: NNCCGGAAGTN	TF:M11435	1.47568e-06	5.83101	11838	114	98	19917	TF	TF	TF	TF	TF		TF	TF	TF	TF	TF	TF	TF	TF	TF	TF	TF	TF	TF	TF		TF	TF	TF	TF	TF	TF		TF	TF	TF		TF	TF	TF	TF	TF	TF	TF		TF
TF	Factor: PEA3; motif: NACCGGAAGTN	TF:M11428	1.47659e-06	5.83074	7260	114	74	19917	TF	TF			TF		TF	TF	TF	TF	TF	TF			TF	TF	TF	TF	TF	TF				TF	TF	TF	TF		TF		TF			TF		TF	TF	TF	TF		TF
TF	Factor: Elk-1; motif: NRCCGGAAGTN	TF:M11433	1.55078e-06	5.80945	7772	114	77	19917	TF	TF			TF	TF	TF	TF	TF	TF	TF	TF				TF	TF	TF	TF	TF				TF	TF	TF			TF		TF		TF	TF		TF	TF	TF			TF
TF	Factor: ER81; motif: RCCGGAARYN	TF:M02065	3.49299e-06	5.4568	12666	114	101	19917	TF	TF		TF	TF		TF	TF	TF	TF	TF	TF	TF	TF	TF	TF	TF	TF	TF	TF	TF		TF	TF	TF	TF	TF		TF	TF	TF		TF	TF	TF	TF	TF	TF	TF		TF
TF	Factor: Elf-1; motif: NNANCCGGAAGTGS	TF:M09900	5.7631e-06	5.23934	5264	114	60	19917	TF	TF			TF			TF		TF	TF					TF			TF					TF	TF	TF	TF				TF				TF	TF	TF	TF	TF
TF	Factor: ER81; motif: NNCCGGAWGYN	TF:M11419	8.49821e-06	5.07067	5760	114	63	19917	TF	TF			TF		TF	TF		TF	TF	TF			TF	TF	TF	TF	TF	TF				TF	TF	TF			TF		TF			TF		TF	TF	TF			TF
TF	Factor: GABP-alpha; motif: NNNRCCGGAAGTGN	TF:M09935	9.03925e-06	5.04387	4467	114	54	19917	TF	TF			TF		TF	TF		TF	TF	TF				TF			TF					TF	TF	TF	TF				TF				TF		TF		TF
TF	Factor: Elk-1; motif: NRSCGGAAGNN	TF:M11434	1.57158e-05	4.80366	8290	114	78	19917	TF	TF	TF	TF	TF		TF	TF	TF	TF	TF	TF				TF	TF	TF	TF	TF				TF	TF	TF	TF				TF			TF	TF	TF	TF	TF	TF		TF
TF	Factor: Elf-1; motif: NANGCGGAAGTR	TF:M11452	1.79684e-05	4.74549	6324	114	66	19917	TF	TF			TF		TF		TF	TF	TF	TF				TF			TF				TF		TF	TF	TF				TF		TF		TF	TF	TF	TF	TF
TF	Factor: ETV7; motif: NCCGGAANNN	TF:M02071	2.53632e-05	4.5958	10214	114	88	19917	TF	TF		TF	TF		TF	TF	TF	TF	TF		TF		TF	TF	TF	TF	TF	TF	TF			TF	TF	TF				TF	TF		TF	TF		TF	TF	TF			TF
TF	Factor: ETV4; motif: ACCGGAAGTN	TF:M03982	3.61538e-05	4.44185	6903	114	69	19917	TF	TF			TF			TF	TF	TF	TF	TF				TF	TF	TF	TF	TF				TF	TF	TF			TF	TF	TF			TF		TF	TF	TF			TF
TF	Factor: GABP-alpha; motif: CACTTCCGG	TF:M04698	5.50864e-05	4.25896	3221	114	43	19917	TF	TF			TF					TF		TF							TF						TF	TF	TF				TF				TF		TF		TF
TF	Factor: Elk-1; motif: NACMGGAAGTN	TF:M11432	6.67682e-05	4.17543	6201	114	64	19917	TF	TF					TF	TF		TF	TF	TF				TF	TF	TF	TF				TF	TF	TF	TF				TF	TF			TF		TF	TF	TF			TF
TF	Factor: ER71; motif: ACCGGAARYN	TF:M02067	0.000140331	3.85285	6001	114	62	19917	TF	TF			TF		TF	TF		TF	TF	TF				TF	TF	TF	TF	TF				TF	TF	TF				TF	TF		TF	TF			TF	TF			TF
TF	Factor: Erm; motif: ACCGGAAGTN	TF:M02069	0.000152124	3.8178	6961	114	68	19917	TF				TF			TF		TF	TF				TF	TF	TF	TF	TF	TF				TF	TF	TF			TF	TF	TF			TF		TF	TF	TF			TF
TF	Factor: ZF5; motif: GGSGCGCGS	TF:M10438	0.000153917	3.81271	16373	114	112	19917	TF	TF	TF	TF	TF	TF	TF	TF	TF	TF	TF	TF	TF	TF	TF	TF	TF	TF	TF	TF	TF	TF	TF	TF	TF	TF	TF	TF		TF	TF	TF	TF	TF	TF	TF	TF	TF	TF	TF	TF
TF	Factor: p300; motif: ACNTCCG; match class: 1	TF:M04826_1	0.000175599	3.75548	15413	114	109	19917	TF	TF	TF	TF	TF	TF	TF	TF	TF	TF	TF	TF	TF	TF	TF	TF	TF	TF	TF	TF	TF		TF	TF	TF	TF	TF	TF	TF	TF	TF	TF	TF	TF	TF	TF	TF	TF	TF	TF	TF
TF	Factor: Elk-1:HOXA1; motif: ACCGGAAGTAATTA	TF:M08451	0.000187581	3.72681	8515	114	77	19917	TF	TF		TF	TF	TF	TF	TF	TF	TF	TF	TF				TF	TF	TF	TF	TF		TF	TF		TF	TF	TF				TF		TF	TF	TF	TF	TF	TF			TF
TF	Factor: IRX-1; motif: NACRYNNNNNNNNRYGNN; match class: 1	TF:M11018_1	0.000218199	3.66115	16079	114	111	19917	TF	TF	TF	TF	TF		TF	TF	TF	TF	TF	TF	TF	TF	TF	TF	TF	TF	TF	TF	TF	TF	TF	TF	TF	TF	TF	TF			TF	TF	TF	TF	TF	TF	TF	TF	TF	TF	TF
TF	Factor: EHF; motif: CSCGGAARTN	TF:M02052	0.000225	3.64782	10199	114	86	19917	TF	TF		TF	TF		TF	TF	TF	TF	TF	TF		TF		TF	TF	TF	TF	TF			TF	TF	TF	TF	TF				TF		TF	TF	TF	TF	TF	TF	TF		TF
TF	Factor: ETS1; motif: ACCGGAARYN	TF:M03977	0.000258864	3.58693	10612	114	88	19917	TF	TF			TF		TF	TF	TF	TF	TF	TF	TF		TF	TF	TF	TF	TF	TF	TF			TF	TF	TF			TF	TF	TF		TF	TF		TF	TF	TF			TF
TF	Factor: GABP-alpha; motif: CTTCCK	TF:M01660	0.000268057	3.57177	11217	114	91	19917	TF	TF	TF	TF	TF	TF	TF	TF	TF	TF	TF	TF		TF	TF	TF	TF	TF	TF	TF		TF	TF	TF	TF	TF	TF				TF		TF	TF	TF	TF	TF	TF	TF		TF
TF	Factor: Fli-1; motif: NACCGGAARTN	TF:M11400	0.000272904	3.56399	10042	114	85	19917	TF	TF			TF			TF	TF	TF	TF	TF	TF		TF	TF	TF	TF	TF	TF	TF			TF	TF	TF			TF	TF	TF		TF	TF		TF	TF	TF			TF
TF	Factor: ELF4; motif: NCCGGAARTN	TF:M02056	0.000349109	3.45704	5379	114	57	19917	TF	TF			TF					TF		TF			TF	TF			TF					TF	TF	TF	TF			TF	TF		TF		TF	TF	TF		TF
TF	Factor: Fli-1; motif: NACCGGAARTN	TF:M11404	0.000414703	3.38226	8828	114	78	19917	TF	TF			TF			TF	TF	TF	TF	TF	TF		TF	TF	TF	TF	TF	TF				TF	TF	TF			TF	TF	TF		TF	TF		TF	TF	TF			TF
TF	Factor: Erg; motif: ACCGGAAGTN	TF:M02062	0.000453306	3.34361	8143	114	74	19917	TF	TF			TF		TF	TF	TF	TF	TF	TF	TF			TF	TF	TF	TF	TF				TF	TF	TF				TF	TF		TF	TF		TF	TF	TF			TF
TF	Factor: Erm; motif: NRCMGGAAGTN	TF:M11422	0.000533825	3.2726	4711	114	52	19917	TF	TF					TF			TF	TF	TF				TF	TF	TF	TF				TF	TF	TF	TF				TF	TF						TF
TF	Factor: FLI1; motif: ACCGGAARTN	TF:M03988	0.00073945	3.13109	8401	114	75	19917	TF	TF			TF			TF	TF	TF	TF	TF	TF		TF	TF	TF	TF	TF	TF				TF	TF	TF				TF	TF		TF	TF		TF	TF	TF			TF
TF	Factor: SAP-1; motif: ACCGGAAGTNN	TF:M09607	0.000766604	3.11543	4762	114	52	19917	TF	TF			TF		TF		TF	TF		TF							TF						TF	TF	TF				TF				TF	TF	TF		TF
TF	Factor: c-ets-2; motif: ACCGGAWRTN; match class: 1	TF:M02064_1	0.000805221	3.09409	4626	114	51	19917	TF			TF			TF		TF	TF		TF	TF		TF	TF	TF		TF					TF	TF				TF		TF			TF		TF	TF				TF
TF	Factor: Elf-1; motif: NAANCMGGAAGTGN	TF:M09605	0.000970349	3.01307	5835	114	59	19917	TF	TF			TF			TF		TF	TF					TF			TF	TF				TF	TF	TF	TF				TF			TF		TF	TF	TF
TF	Factor: ER81; motif: RCCGGAARYN; match class: 1	TF:M02065_1	0.00111093	2.95431	6798	114	65	19917	TF			TF	TF		TF	TF	TF	TF		TF	TF	TF		TF		TF	TF					TF	TF						TF		TF	TF	TF	TF	TF
TF	Factor: ELF1; motif: AACCCGGAAGTR	TF:M03966	0.00128509	2.89107	6662	114	64	19917	TF	TF			TF					TF	TF	TF		TF	TF	TF			TF				TF		TF	TF	TF		TF	TF	TF		TF		TF	TF	TF	TF			TF
TF	Factor: Elf-1; motif: NANGCGGAAGTN	TF:M11448	0.00138563	2.85835	7657	114	70	19917	TF	TF	TF	TF	TF		TF	TF	TF	TF	TF	TF		TF		TF			TF				TF		TF	TF	TF				TF		TF		TF	TF	TF	TF	TF
TF	Factor: Fli-1; motif: ACCGGAAGYN	TF:M02073	0.00151018	2.82097	5905	114	59	19917	TF				TF			TF	TF	TF	TF		TF			TF	TF	TF	TF	TF				TF	TF	TF				TF	TF			TF		TF	TF	TF			TF
TF	Factor: TEL1; motif: CNCGGAANNN	TF:M02070	0.00153064	2.81513	10938	114	88	19917	TF	TF		TF	TF	TF	TF	TF	TF	TF		TF		TF	TF			TF	TF	TF	TF	TF		TF	TF	TF	TF	TF		TF	TF	TF	TF		TF	TF	TF	TF	TF
TF	Factor: GABP-ALPHA; motif: RCCGGAARTNN	TF:M08917	0.00168586	2.77318	2724	114	36	19917	TF	TF								TF	TF	TF				TF			TF					TF	TF	TF					TF						TF
TF	Factor: ERF; motif: ACCGGAARYN	TF:M02061	0.00172482	2.76326	2604	114	35	19917	TF	TF					TF		TF	TF	TF	TF				TF			TF						TF	TF				TF							TF
TF	Factor: CHD2; motif: TCTCGCGAG; match class: 1	TF:M04710_1	0.00200055	2.69885	11589	114	91	19917	TF	TF	TF	TF	TF		TF	TF	TF	TF	TF	TF	TF	TF		TF	TF	TF	TF	TF	TF		TF		TF	TF	TF	TF	TF	TF	TF		TF	TF	TF		TF	TF	TF	TF	TF
TF	Factor: CHD2; motif: TCTCGCGAG	TF:M04710	0.00207681	2.6826	14245	114	103	19917	TF	TF	TF	TF	TF		TF	TF	TF	TF	TF	TF	TF	TF	TF	TF	TF	TF	TF	TF	TF		TF	TF	TF	TF	TF	TF	TF	TF	TF	TF	TF	TF	TF	TF	TF	TF	TF	TF	TF
TF	Factor: Erg; motif: NACCGGAARYN	TF:M11392	0.00224861	2.64809	8777	114	76	19917	TF	TF			TF			TF	TF	TF	TF	TF	TF			TF	TF	TF	TF	TF				TF	TF	TF				TF	TF		TF	TF		TF	TF	TF			TF
TF	Factor: PEA3; motif: NACCGGAAGTN; match class: 1	TF:M11427_1	0.00247847	2.60582	4645	114	50	19917	TF				TF		TF	TF	TF	TF		TF			TF	TF			TF					TF	TF						TF				TF	TF	TF				TF
TF	Factor: ESE-1; motif: NSMGGAARTN	TF:M02055	0.00293999	2.53165	7623	114	69	19917	TF	TF			TF		TF	TF		TF	TF	TF							TF	TF			TF	TF	TF	TF	TF				TF				TF	TF	TF	TF	TF		TF
TF	Factor: ESE-1; motif: NSMGGAARTN	TF:M01214	0.00293999	2.53165	7623	114	69	19917	TF	TF			TF		TF	TF		TF	TF	TF							TF	TF			TF	TF	TF	TF	TF				TF				TF	TF	TF	TF	TF		TF
TF	Factor: E2F-2; motif: GCGCGCGCGYW	TF:M11531	0.00302892	2.51871	13379	114	99	19917		TF	TF	TF	TF	TF		TF	TF		TF	TF	TF	TF	TF	TF	TF	TF	TF	TF	TF	TF	TF	TF	TF	TF	TF	TF				TF	TF	TF		TF	TF	TF	TF	TF	TF
TF	Factor: SAP-1; motif: NRCCGGAWGYN	TF:M11437	0.0033675	2.47269	2803	114	36	19917	TF							TF		TF	TF					TF			TF						TF	TF					TF						TF
TF	Factor: ELK1; motif: ACCGGAAGTN	TF:M03970	0.00343129	2.46454	4838	114	51	19917	TF	TF					TF	TF	TF	TF	TF	TF				TF		TF	TF	TF					TF	TF					TF			TF		TF	TF	TF			TF
TF	Factor: Elf-1; motif: NANGCGGAAGTN; match class: 1	TF:M11448_1	0.004302	2.36633	2341	114	32	19917		TF			TF				TF		TF	TF		TF											TF						TF		TF		TF	TF
TF	Factor: ELF1; motif: NCCGGAARTN	TF:M02053	0.00450941	2.34588	6085	114	59	19917	TF	TF			TF			TF		TF	TF	TF			TF				TF	TF				TF	TF	TF			TF	TF	TF				TF	TF	TF	TF
TF	Factor: ETV7; motif: NNSCGGAAGTR	TF:M08760	0.00567279	2.2462	2371	114	32	19917	TF	TF			TF	TF				TF		TF							TF						TF	TF	TF												TF
TF	Factor: GABPalpha_GABPbeta; motif: CTTCCKGY	TF:M03791	0.00623704	2.20502	3004	114	37	19917	TF										TF					TF	TF	TF	TF					TF	TF											TF	TF
TF	Factor: PEA3; motif: NACCGGAAGTN; match class: 1	TF:M11430_1	0.00675167	2.17059	4943	114	51	19917	TF				TF				TF	TF		TF	TF		TF	TF			TF					TF	TF						TF				TF	TF	TF				TF
TF	Factor: ZF5; motif: GSGCGCGR; match class: 1	TF:M00716_1	0.00683757	2.1651	14230	114	102	19917		TF	TF	TF	TF	TF		TF	TF	TF	TF	TF	TF	TF	TF	TF	TF	TF	TF	TF	TF	TF	TF	TF	TF	TF	TF	TF			TF	TF	TF	TF	TF	TF	TF		TF	TF	TF
TF	Factor: YY1; motif: NNCGCCATTNN; match class: 1	TF:M03924_1	0.0111527	1.95262	3744	114	42	19917	TF							TF		TF	TF	TF		TF	TF		TF	TF					TF	TF	TF		TF	TF			TF	TF				TF			TF	TF
TF	Factor: E2F-4; motif: NTTTCSCGCC; match class: 1	TF:M07380_1	0.0114779	1.94014	8046	114	70	19917		TF	TF			TF		TF		TF	TF			TF	TF	TF	TF	TF	TF	TF			TF	TF	TF		TF	TF			TF		TF					TF	TF
TF	Factor: ELK3; motif: ACCGGAAGTN	TF:M03972	0.0122344	1.91242	1216	114	21	19917	TF									TF															TF	TF											TF
TF	Factor: Elf-1; motif: AWCCCGGAAGTN	TF:M07415	0.0123367	1.9088	8060	114	70	19917	TF				TF			TF	TF	TF	TF				TF	TF	TF	TF	TF	TF				TF	TF	TF					TF			TF		TF	TF	TF			TF
TF	Factor: ER81; motif: NACCGGAAGTN	TF:M11421	0.0146281	1.83481	2356	114	31	19917	TF									TF	TF					TF		TF	TF						TF	TF					TF						TF
TF	Factor: GABP; motif: CACTTCCGGNNN	TF:M01258	0.0152284	1.81735	2860	114	35	19917	TF							TF		TF						TF			TF					TF	TF	TF					TF						TF
TF	Factor: SAP-1; motif: NRNCGGAWRYN	TF:M11436	0.0156029	1.80679	1445	114	23	19917	TF	TF									TF					TF			TF						TF
TF	Factor: Net; motif: NACCGGAAGTN	TF:M11442	0.0182534	1.73866	2022	114	28	19917	TF									TF	TF					TF			TF						TF	TF											TF
TF	Factor: c-ets-2; motif: ACCGGAWRTN	TF:M02064	0.0191288	1.71831	11050	114	86	19917	TF	TF		TF	TF		TF	TF	TF	TF	TF	TF	TF		TF	TF	TF	TF	TF	TF			TF	TF	TF	TF			TF	TF	TF		TF	TF		TF	TF	TF			TF
TF	Factor: GABP-alpha; motif: NRCCGGAAGTN	TF:M11415	0.0202728	1.69309	3289	114	38	19917	TF									TF	TF					TF	TF	TF	TF					TF	TF	TF					TF						TF
TF	Factor: GABPA; motif: ACCGGAAGTN	TF:M03990	0.0255325	1.59291	5312	114	52	19917	TF				TF			TF		TF	TF				TF	TF	TF	TF	TF	TF				TF	TF	TF			TF		TF					TF	TF	TF
TF	Factor: E2F-1:HES-7; motif: GGCRCGTGSYNNWNGGCGCSM	TF:M08525	0.0272316	1.56493	17224	114	112	19917	TF	TF	TF	TF	TF	TF	TF	TF	TF	TF	TF	TF	TF	TF	TF	TF	TF	TF	TF	TF	TF	TF	TF	TF	TF	TF	TF	TF	TF	TF	TF	TF	TF	TF	TF	TF	TF	TF	TF	TF	TF
TF	Factor: Elk-1:HOXB13; motif: ACCGGAAGTNGTAAAN	TF:M08222	0.0294956	1.53024	7725	114	67	19917	TF	TF			TF	TF		TF	TF	TF		TF				TF	TF		TF	TF	TF	TF			TF	TF		TF	TF	TF	TF				TF	TF	TF				TF
TF	Factor: etv3; motif: ACCGGAAGYN	TF:M02068	0.0313958	1.50313	3485	114	39	19917	TF	TF					TF		TF	TF	TF	TF				TF		TF	TF						TF	TF											TF
TF	Factor: ELF2; motif: CCCGGAARYN	TF:M02054	0.0318952	1.49628	3087	114	36	19917	TF				TF					TF	TF					TF			TF	TF					TF	TF					TF						TF	TF
TF	Factor: E2F-7; motif: GRGGCGGGAANNN	TF:M09896	0.0331918	1.47897	10034	114	80	19917		TF		TF		TF		TF	TF	TF	TF	TF		TF	TF	TF	TF	TF	TF	TF	TF		TF	TF	TF	TF	TF	TF		TF	TF		TF				TF		TF
TF	Factor: Net; motif: NRCCGGAAGTN	TF:M11439	0.0338025	1.47105	2580	114	32	19917	TF									TF	TF					TF			TF						TF	TF					TF						TF
TF	Factor: ETV3; motif: ACCGGAAGTN	TF:M03981	0.0381792	1.41817	2346	114	30	19917	TF	TF							TF	TF									TF						TF	TF					TF						TF
TF	Factor: EHF; motif: CSCGGAARTN; match class: 1	TF:M02052_1	0.0429636	1.3669	4086	114	43	19917		TF			TF			TF		TF	TF	TF						TF	TF						TF		TF				TF		TF		TF		TF		TF		TF
TF	Factor: FEV; motif: ACCGGAAGTN	TF:M03987	0.0447098	1.3496	1324	114	21	19917	TF									TF															TF	TF											TF
TF	Factor: ERG; motif: ACCGGAARTN	TF:M03975	0.0447221	1.34948	10098	114	80	19917	TF	TF			TF		TF	TF	TF	TF	TF	TF	TF		TF	TF	TF	TF	TF	TF				TF	TF	TF				TF	TF		TF	TF		TF	TF	TF			TF
TF	Factor: ER71; motif: NACCGGAARTN	TF:M11413	0.0450749	1.34607	2122	114	28	19917	TF									TF	TF								TF						TF	TF					TF						TF
HPA	appendix	HPA:0030000	4.2014e-09	8.37661	7644	79	78	10877	Enhanced	Approved	Approved	Approved	Approved	Supported		Enhanced	Approved	Supported	Supported	Approved			Approved		Supported	Approved		Supported	Enhanced	Approved		Supported			Approved	Approved	Approved	Approved	Approved		Approved	Approved	Supported	Approved		Approved	Approved
HPA	endometrium 1	HPA:0160000	1.15066e-08	7.93905	6954	79	75	10877	Enhanced	Approved	Approved	Approved	Approved	Supported		Enhanced	Approved	Supported	Supported	Approved			Approved		Supported	Approved			Enhanced	Approved		Supported			Approved	Approved	Approved	Approved	Approved		Approved	Approved	Supported	Approved		Approved	Approved
HPA	thyroid gland; glandular cells[â‰¥Low]	HPA:0590051	2.24062e-08	7.64963	7022	79	75	10877	Enhanced	Approved	Approved	Approved	Approved	Supported		Enhanced	Approved	Supported	Supported	Approved			Approved		Supported	Approved		Supported	Enhanced	Approved		Supported			Approved	Approved		Approved	Approved		Approved	Approved	Supported	Approved		Approved	Approved
HPA	thyroid gland	HPA:0590000	2.24062e-08	7.64963	7022	79	75	10877	Enhanced	Approved	Approved	Approved	Approved	Supported		Enhanced	Approved	Supported	Supported	Approved			Approved		Supported	Approved		Supported	Enhanced	Approved		Supported			Approved	Approved		Approved	Approved		Approved	Approved	Supported	Approved		Approved	Approved
HPA	breast	HPA:0050000	4.08441e-08	7.38887	7084	79	75	10877	Enhanced	Approved	Approved	Approved	Approved	Supported		Enhanced	Approved	Supported	Supported	Approved			Approved		Supported	Approved		Supported	Enhanced	Approved		Supported			Approved	Approved	Approved		Approved		Approved	Approved	Supported	Approved		Approved	Approved
HPA	breast; glandular cells[â‰¥Low]	HPA:0050051	8.02802e-08	7.09539	6717	79	73	10877	Enhanced	Approved	Approved	Approved	Approved	Supported		Enhanced	Approved	Supported	Supported	Approved			Approved		Supported	Approved		Supported	Enhanced	Approved		Supported			Approved	Approved	Approved		Approved		Approved	Approved	Supported	Approved		Approved	Approved
HPA	colon; glandular cells[â‰¥Medium]	HPA:0130052	9.17555e-08	7.03737	6333	79	71	10877	Enhanced	Approved	Approved	Approved	Approved	Supported		Enhanced	Approved	Supported	Supported				Approved		Supported	Approved		Supported	Enhanced	Approved		Supported			Approved	Approved		Approved			Approved	Approved	Supported	Approved		Approved	Approved
HPA	lung	HPA:0300000	1.48879e-07	6.82717	7220	79	75	10877	Enhanced	Approved	Approved	Approved	Approved	Supported		Enhanced	Approved	Supported	Supported	Approved			Approved		Supported	Approved		Supported	Enhanced	Approved		Supported			Approved	Approved	Approved	Approved	Approved		Approved	Approved	Supported	Approved		Approved	Approved
HPA	colon	HPA:0130000	1.60946e-07	6.79332	8020	79	78	10877	Enhanced	Approved	Approved	Approved	Approved	Supported		Enhanced	Approved	Supported	Supported	Approved			Approved		Supported	Approved		Supported	Enhanced	Approved		Supported			Approved	Approved	Approved	Approved	Approved		Approved	Approved	Supported	Approved		Approved	Approved
HPA	colon; glandular cells[â‰¥Low]	HPA:0130051	1.68265e-07	6.77401	7473	79	76	10877	Enhanced	Approved	Approved	Approved	Approved	Supported		Enhanced	Approved	Supported	Supported				Approved		Supported	Approved		Supported	Enhanced	Approved		Supported			Approved	Approved	Approved	Approved	Approved		Approved	Approved	Supported	Approved		Approved	Approved
HPA	pancreas	HPA:0350000	3.28725e-07	6.48317	7305	79	75	10877	Enhanced	Approved	Approved	Approved	Approved	Supported		Enhanced	Approved	Supported	Supported				Approved		Supported	Approved		Supported	Enhanced	Approved		Supported			Approved	Approved	Approved	Approved	Approved		Approved	Approved	Supported	Approved		Approved	Approved
HPA	esophagus; squamous epithelial cells[â‰¥Medium]	HPA:0190222	4.76656e-07	6.3218	4989	79	62	10877	Enhanced	Approved	Approved	Approved		Supported		Enhanced	Approved	Supported	Supported				Approved		Supported			Supported		Approved		Supported				Approved			Approved		Approved	Approved	Supported	Approved		Approved	Approved
HPA	gallbladder; glandular cells[â‰¥Medium]	HPA:0220052	4.92438e-07	6.30765	6512	79	71	10877	Enhanced	Approved	Approved	Approved	Approved	Supported		Enhanced	Approved	Supported	Supported	Approved			Approved		Supported	Approved		Supported	Enhanced	Approved		Supported			Approved			Approved	Approved		Approved	Approved	Supported	Approved		Approved	Approved
HPA	endometrium 1; glandular cells[â‰¥Low]	HPA:0160051	5.62658e-07	6.24976	6722	79	72	10877	Enhanced	Approved	Approved	Approved	Approved	Supported		Enhanced	Approved	Supported	Supported	Approved			Approved		Supported	Approved			Enhanced	Approved		Supported			Approved	Approved		Approved	Approved		Approved	Approved	Supported	Approved		Approved	Approved
HPA	seminal vesicle	HPA:0430000	5.99842e-07	6.22196	6729	79	72	10877	Enhanced	Approved	Approved	Approved	Approved	Supported		Enhanced	Approved	Supported	Supported	Approved			Approved		Supported	Approved		Supported	Enhanced	Approved		Supported			Approved	Approved			Approved		Approved	Approved	Supported			Approved	Approved
HPA	seminal vesicle; glandular cells[â‰¥Low]	HPA:0430051	5.99842e-07	6.22196	6729	79	72	10877	Enhanced	Approved	Approved	Approved	Approved	Supported		Enhanced	Approved	Supported	Supported	Approved			Approved		Supported	Approved		Supported	Enhanced	Approved		Supported			Approved	Approved			Approved		Approved	Approved	Supported			Approved	Approved
HPA	small intestine; glandular cells[â‰¥Low]	HPA:0480051	8.86706e-07	6.05222	7653	79	76	10877	Enhanced	Approved	Approved	Approved	Approved	Supported		Enhanced	Approved	Supported	Supported				Approved		Supported	Approved		Supported	Enhanced	Approved		Supported			Approved	Approved	Approved	Approved	Approved		Approved	Approved	Supported	Approved		Approved	Approved
HPA	small intestine	HPA:0480000	8.86706e-07	6.05222	7653	79	76	10877	Enhanced	Approved	Approved	Approved	Approved	Supported		Enhanced	Approved	Supported	Supported				Approved		Supported	Approved		Supported	Enhanced	Approved		Supported			Approved	Approved	Approved	Approved	Approved		Approved	Approved	Supported	Approved		Approved	Approved
HPA	esophagus	HPA:0190000	9.41316e-07	6.02626	6583	79	71	10877	Enhanced	Approved	Approved	Approved	Approved	Supported		Enhanced	Approved	Supported	Supported				Approved		Supported			Supported	Enhanced	Approved		Supported			Approved	Approved		Approved	Approved		Approved	Approved	Supported	Approved		Approved	Approved
HPA	esophagus; squamous epithelial cells[â‰¥Low]	HPA:0190221	9.41316e-07	6.02626	6583	79	71	10877	Enhanced	Approved	Approved	Approved	Approved	Supported		Enhanced	Approved	Supported	Supported				Approved		Supported			Supported	Enhanced	Approved		Supported			Approved	Approved		Approved	Approved		Approved	Approved	Supported	Approved		Approved	Approved
HPA	urinary bladder; urothelial cells[â‰¥Low]	HPA:0610831	9.91231e-07	6.00383	7201	79	74	10877	Enhanced	Approved	Approved	Approved	Approved	Supported		Enhanced	Approved	Supported	Supported				Approved		Supported	Approved		Supported	Enhanced	Approved		Supported			Approved	Approved	Approved		Approved		Approved	Approved	Supported	Approved		Approved	Approved
HPA	urinary bladder	HPA:0610000	9.91231e-07	6.00383	7201	79	74	10877	Enhanced	Approved	Approved	Approved	Approved	Supported		Enhanced	Approved	Supported	Supported				Approved		Supported	Approved		Supported	Enhanced	Approved		Supported			Approved	Approved	Approved		Approved		Approved	Approved	Supported	Approved		Approved	Approved
HPA	duodenum; glandular cells[â‰¥Low]	HPA:0150051	9.97804e-07	6.00095	7666	79	76	10877	Enhanced	Approved	Approved	Approved	Approved	Supported		Enhanced	Approved	Supported	Supported				Approved		Supported	Approved		Supported	Enhanced	Approved		Supported			Approved	Approved	Approved	Approved	Approved		Approved	Approved	Supported	Approved		Approved	Approved
HPA	duodenum	HPA:0150000	9.97804e-07	6.00095	7666	79	76	10877	Enhanced	Approved	Approved	Approved	Approved	Supported		Enhanced	Approved	Supported	Supported				Approved		Supported	Approved		Supported	Enhanced	Approved		Supported			Approved	Approved	Approved	Approved	Approved		Approved	Approved	Supported	Approved		Approved	Approved
HPA	appendix; glandular cells[â‰¥Low]	HPA:0030051	1.00022e-06	5.99991	7202	79	74	10877	Enhanced	Approved	Approved	Approved	Approved	Supported		Enhanced	Approved	Supported	Supported				Approved		Supported	Approved		Supported	Enhanced	Approved		Supported			Approved	Approved		Approved	Approved		Approved	Approved	Supported	Approved		Approved	Approved
HPA	skin 1	HPA:0460000	1.0662e-06	5.97216	6996	79	73	10877	Enhanced	Approved	Approved	Approved	Approved	Supported		Enhanced	Approved	Supported	Supported	Approved			Approved		Supported	Approved		Supported	Enhanced			Supported			Approved	Approved	Approved	Approved	Approved		Approved	Approved		Approved		Approved	Approved
HPA	tonsil	HPA:0600000	1.10239e-06	5.95767	7677	79	76	10877	Enhanced	Approved	Approved	Approved	Approved	Supported		Enhanced	Approved	Supported	Supported	Approved			Approved		Supported	Approved		Supported		Approved		Supported			Approved	Approved	Approved	Approved	Approved		Approved	Approved	Supported	Approved		Approved	Approved
HPA	endometrium 2	HPA:0170000	1.29469e-06	5.88783	6814	79	72	10877	Enhanced	Approved	Approved	Approved	Approved	Supported		Enhanced	Approved	Supported	Supported	Approved			Approved		Supported	Approved		Supported	Enhanced	Approved		Supported			Approved	Approved		Approved	Approved		Approved	Approved	Supported			Approved	Approved
HPA	lymph node	HPA:0310000	1.3115e-06	5.88223	6431	79	70	10877	Enhanced		Approved	Approved	Approved	Supported		Enhanced	Approved	Supported	Supported	Approved			Approved		Supported	Approved		Supported		Approved		Supported			Approved	Approved	Approved	Approved	Approved		Approved	Approved	Supported	Approved			Approved
HPA	endometrium 2; glandular cells[â‰¥Low]	HPA:0170051	1.39912e-06	5.85414	6627	79	71	10877	Enhanced	Approved	Approved	Approved	Approved	Supported		Enhanced	Approved	Supported	Supported	Approved			Approved		Supported	Approved		Supported	Enhanced	Approved		Supported			Approved	Approved		Approved	Approved		Approved	Approved	Supported			Approved	Approved
HPA	stomach 1; glandular cells[â‰¥Medium]	HPA:0540052	1.4067e-06	5.8518	6256	79	69	10877	Enhanced		Approved	Approved	Approved	Supported		Enhanced	Approved	Supported	Supported				Approved		Supported	Approved		Supported		Approved		Supported			Approved	Approved		Approved	Approved		Approved	Approved	Supported	Approved		Approved	Approved
HPA	endometrium 2; glandular cells[â‰¥Medium]	HPA:0170052	1.42138e-06	5.84729	4805	79	60	10877	Enhanced	Approved	Approved	Approved		Supported		Enhanced	Approved	Supported	Supported				Approved		Supported	Approved		Supported	Enhanced	Approved		Supported			Approved	Approved		Approved	Approved		Approved	Approved	Supported				Approved
HPA	pancreas; exocrine glandular cells[â‰¥Low]	HPA:0350471	1.64822e-06	5.78298	6841	79	72	10877	Enhanced	Approved	Approved	Approved	Approved	Supported		Enhanced	Approved	Supported	Supported				Approved		Supported	Approved		Supported	Enhanced	Approved		Supported			Approved	Approved	Approved	Approved	Approved		Approved	Approved	Supported	Approved		Approved	Approved
HPA	spleen; cells in white pulp[â‰¥Medium]	HPA:0530722	2.2278e-06	5.65212	2684	79	43	10877	Enhanced		Approved			Supported		Enhanced			Supported	Approved					Supported	Approved				Approved		Supported						Approved	Approved		Approved		Supported				Approved
HPA	lung; macrophages[â‰¥Low]	HPA:0300411	2.45086e-06	5.61068	6690	79	71	10877	Enhanced	Approved	Approved	Approved	Approved	Supported		Enhanced	Approved	Supported	Supported	Approved			Approved		Supported	Approved		Supported	Enhanced	Approved		Supported			Approved	Approved	Approved	Approved	Approved		Approved	Approved	Supported	Approved		Approved	Approved
HPA	parathyroid gland	HPA:0360000	3.06528e-06	5.51353	5824	79	66	10877	Enhanced	Approved	Approved	Approved	Approved	Supported		Enhanced	Approved	Supported	Supported				Approved		Supported	Approved		Supported	Enhanced	Approved		Supported			Approved	Approved		Approved	Approved		Approved	Approved	Supported	Approved		Approved	Approved
HPA	parathyroid gland; glandular cells[â‰¥Low]	HPA:0360051	3.06528e-06	5.51353	5824	79	66	10877	Enhanced	Approved	Approved	Approved	Approved	Supported		Enhanced	Approved	Supported	Supported				Approved		Supported	Approved		Supported	Enhanced	Approved		Supported			Approved	Approved		Approved	Approved		Approved	Approved	Supported	Approved		Approved	Approved
HPA	tonsil; squamous epithelial cells[â‰¥Medium]	HPA:0600222	3.07724e-06	5.51184	4887	79	60	10877	Enhanced	Approved	Approved	Approved		Supported		Enhanced		Supported	Supported	Approved			Approved		Supported			Supported		Approved		Supported			Approved	Approved					Approved	Approved	Supported				Approved
HPA	stomach 1	HPA:0540000	3.09106e-06	5.50989	7553	79	75	10877	Enhanced	Approved	Approved	Approved	Approved	Supported		Enhanced	Approved	Supported	Supported				Approved		Supported	Approved		Supported	Enhanced	Approved		Supported			Approved	Approved	Approved	Approved	Approved		Approved	Approved	Supported	Approved		Approved	Approved
HPA	stomach 1; glandular cells[â‰¥Low]	HPA:0540051	3.09106e-06	5.50989	7553	79	75	10877	Enhanced	Approved	Approved	Approved	Approved	Supported		Enhanced	Approved	Supported	Supported				Approved		Supported	Approved		Supported	Enhanced	Approved		Supported			Approved	Approved	Approved	Approved	Approved		Approved	Approved	Supported	Approved		Approved	Approved
HPA	stomach 2; glandular cells[â‰¥Medium]	HPA:0550052	3.76608e-06	5.42411	6189	79	68	10877	Enhanced	Approved	Approved	Approved	Approved	Supported		Enhanced		Supported	Supported				Approved		Supported	Approved		Supported		Approved		Supported			Approved	Approved		Approved	Approved		Approved	Approved	Supported	Approved		Approved	Approved
HPA	fallopian tube	HPA:0210000	4.03545e-06	5.39411	7359	79	74	10877	Enhanced	Approved	Approved	Approved	Approved	Supported		Enhanced	Approved	Supported	Supported	Approved			Approved		Supported	Approved		Supported	Enhanced	Approved		Supported			Approved	Approved	Approved		Approved		Approved	Approved	Supported	Approved		Approved	Approved
HPA	tonsil; squamous epithelial cells[â‰¥Low]	HPA:0600221	4.25942e-06	5.37065	6564	79	70	10877	Enhanced	Approved	Approved	Approved	Approved	Supported		Enhanced	Approved	Supported	Supported	Approved			Approved		Supported			Supported		Approved		Supported			Approved	Approved			Approved		Approved	Approved	Supported	Approved			Approved
HPA	fallopian tube; glandular cells[â‰¥Medium]	HPA:0210052	4.37976e-06	5.35855	5074	79	61	10877	Enhanced	Approved	Approved	Approved	Approved	Supported		Enhanced	Approved	Supported	Supported	Approved			Approved		Supported	Approved		Supported		Approved		Supported				Approved			Approved		Approved	Approved	Supported				Approved
HPA	caudate; neuronal cells[â‰¥Low]	HPA:0080131	6.83057e-06	5.16554	6084	79	67	10877	Enhanced	Approved	Approved	Approved	Approved	Supported		Enhanced		Supported	Supported				Approved		Supported	Approved		Supported	Enhanced			Supported			Approved			Approved	Approved		Approved	Approved	Supported	Approved			Approved
HPA	vagina; squamous epithelial cells[â‰¥Low]	HPA:0620221	7.32566e-06	5.13515	5923	79	66	10877	Enhanced	Approved	Approved	Approved		Supported		Enhanced	Approved	Supported	Supported	Approved			Approved		Supported	Approved		Supported		Approved		Supported			Approved	Approved			Approved		Approved	Approved		Approved		Approved	Approved
HPA	vagina	HPA:0620000	7.32566e-06	5.13515	5923	79	66	10877	Enhanced	Approved	Approved	Approved		Supported		Enhanced	Approved	Supported	Supported	Approved			Approved		Supported	Approved		Supported		Approved		Supported			Approved	Approved			Approved		Approved	Approved		Approved		Approved	Approved
HPA	spleen; cells in white pulp[â‰¥Low]	HPA:0530721	8.55999e-06	5.06753	4290	79	55	10877	Enhanced		Approved	Approved	Approved	Supported		Enhanced		Supported	Supported	Approved			Approved		Supported	Approved		Supported		Approved		Supported			Approved			Approved	Approved		Approved	Approved	Supported				Approved
HPA	rectum; glandular cells[â‰¥Medium]	HPA:0400052	9.04208e-06	5.04373	6468	79	69	10877	Enhanced	Approved	Approved	Approved		Supported		Enhanced	Approved	Supported	Supported				Approved		Supported	Approved		Supported	Enhanced	Approved		Supported			Approved	Approved		Approved	Approved		Approved	Approved	Supported	Approved		Approved	Approved
HPA	skin 2	HPA:0470000	1.03403e-05	4.98547	6667	79	70	10877	Enhanced	Approved	Approved	Approved	Approved	Supported		Enhanced	Approved	Supported	Supported	Approved			Approved		Supported	Approved		Supported	Enhanced	Approved		Supported			Approved	Approved			Approved		Approved	Approved	Supported	Approved			Approved
HPA	skin 2; epidermal cells[â‰¥Low]	HPA:0470681	1.03403e-05	4.98547	6667	79	70	10877	Enhanced	Approved	Approved	Approved	Approved	Supported		Enhanced	Approved	Supported	Supported	Approved			Approved		Supported	Approved		Supported	Enhanced	Approved		Supported			Approved	Approved			Approved		Approved	Approved	Supported	Approved			Approved
HPA	breast; glandular cells[â‰¥Medium]	HPA:0050052	1.06909e-05	4.97098	5024	79	60	10877		Approved	Approved	Approved		Supported		Enhanced	Approved	Supported	Supported	Approved			Approved		Supported			Supported	Enhanced	Approved		Supported							Approved		Approved	Approved					Approved
HPA	fallopian tube; glandular cells[â‰¥Low]	HPA:0210051	1.15397e-05	4.93781	6145	79	67	10877	Enhanced	Approved	Approved	Approved	Approved	Supported		Enhanced	Approved	Supported	Supported	Approved			Approved		Supported	Approved		Supported		Approved		Supported				Approved	Approved		Approved		Approved	Approved	Supported			Approved	Approved
HPA	stomach 2; glandular cells[â‰¥Low]	HPA:0550051	1.50749e-05	4.82175	7512	79	74	10877	Enhanced	Approved	Approved	Approved	Approved	Supported		Enhanced	Approved	Supported	Supported				Approved		Supported	Approved		Supported		Approved		Supported			Approved	Approved	Approved	Approved	Approved		Approved	Approved	Supported	Approved		Approved	Approved
HPA	stomach 2	HPA:0550000	1.50749e-05	4.82175	7512	79	74	10877	Enhanced	Approved	Approved	Approved	Approved	Supported		Enhanced	Approved	Supported	Supported				Approved		Supported	Approved		Supported		Approved		Supported			Approved	Approved	Approved	Approved	Approved		Approved	Approved	Supported	Approved		Approved	Approved
HPA	adrenal gland; glandular cells[â‰¥Low]	HPA:0020051	1.6879e-05	4.77265	7313	79	73	10877	Enhanced	Approved	Approved	Approved	Approved	Supported		Enhanced	Approved	Supported	Supported	Approved			Approved		Supported	Approved		Supported	Enhanced	Approved		Supported			Approved		Approved	Approved	Approved		Approved	Approved	Supported	Approved		Approved	Approved
HPA	adrenal gland	HPA:0020000	1.77535e-05	4.75072	7319	79	73	10877	Enhanced	Approved	Approved	Approved	Approved	Supported		Enhanced	Approved	Supported	Supported	Approved			Approved		Supported	Approved		Supported	Enhanced	Approved		Supported			Approved		Approved	Approved	Approved		Approved	Approved	Supported	Approved		Approved	Approved
HPA	kidney; cells in glomeruli[â‰¥Low]	HPA:0270351	1.81289e-05	4.74163	5084	79	60	10877	Enhanced		Approved	Approved	Approved	Supported		Enhanced		Supported	Supported	Approved			Approved		Supported			Supported		Approved		Supported			Approved	Approved	Approved	Approved	Approved			Approved		Approved			Approved
HPA	kidney; cells in tubules[â‰¥Medium]	HPA:0270362	1.8283e-05	4.73795	6373	79	68	10877	Enhanced	Approved	Approved	Approved	Approved	Supported		Enhanced	Approved	Supported	Supported	Approved			Approved		Supported	Approved		Supported	Enhanced			Supported			Approved	Approved		Approved	Approved		Approved	Approved	Supported	Approved		Approved	Approved
HPA	rectum; glandular cells[â‰¥Low]	HPA:0400051	2.16746e-05	4.66405	7555	79	74	10877	Enhanced	Approved	Approved	Approved	Approved	Supported		Enhanced	Approved	Supported	Supported				Approved		Supported	Approved		Supported	Enhanced	Approved		Supported			Approved	Approved	Approved	Approved	Approved		Approved	Approved	Supported	Approved		Approved	Approved
HPA	rectum	HPA:0400000	2.16746e-05	4.66405	7555	79	74	10877	Enhanced	Approved	Approved	Approved	Approved	Supported		Enhanced	Approved	Supported	Supported				Approved		Supported	Approved		Supported	Enhanced	Approved		Supported			Approved	Approved	Approved	Approved	Approved		Approved	Approved	Supported	Approved		Approved	Approved
HPA	gallbladder	HPA:0220000	2.26047e-05	4.6458	7560	79	74	10877	Enhanced	Approved	Approved	Approved	Approved	Supported		Enhanced	Approved	Supported	Supported	Approved			Approved		Supported	Approved		Supported	Enhanced	Approved		Supported			Approved	Approved		Approved	Approved		Approved	Approved	Supported	Approved		Approved	Approved
HPA	gallbladder; glandular cells[â‰¥Low]	HPA:0220051	2.26047e-05	4.6458	7560	79	74	10877	Enhanced	Approved	Approved	Approved	Approved	Supported		Enhanced	Approved	Supported	Supported	Approved			Approved		Supported	Approved		Supported	Enhanced	Approved		Supported			Approved	Approved		Approved	Approved		Approved	Approved	Supported	Approved		Approved	Approved
HPA	prostate	HPA:0390000	2.4429e-05	4.61209	6586	79	69	10877	Enhanced	Approved	Approved	Approved	Approved	Supported		Enhanced	Approved	Supported	Supported	Approved			Approved		Supported	Approved		Supported	Enhanced	Approved		Supported				Approved			Approved		Approved	Approved	Supported			Approved	Approved
HPA	prostate; glandular cells[â‰¥Low]	HPA:0390051	2.4429e-05	4.61209	6586	79	69	10877	Enhanced	Approved	Approved	Approved	Approved	Supported		Enhanced	Approved	Supported	Supported	Approved			Approved		Supported	Approved		Supported	Enhanced	Approved		Supported				Approved			Approved		Approved	Approved	Supported			Approved	Approved
HPA	tonsil; germinal center cells[â‰¥Low]	HPA:0600431	2.44913e-05	4.61099	5899	79	65	10877	Enhanced	Approved	Approved	Approved	Approved	Supported		Enhanced		Supported	Supported	Approved			Approved		Supported			Supported		Approved		Supported				Approved	Approved	Approved	Approved		Approved	Approved	Supported			Approved	Approved
HPA	lymph node; germinal center cells[â‰¥Low]	HPA:0310431	2.91013e-05	4.53609	4991	79	59	10877	Enhanced		Approved	Approved	Approved	Supported		Enhanced		Supported	Supported	Approved			Approved		Supported			Supported		Approved		Supported			Approved	Approved		Approved	Approved		Approved	Approved	Supported	Approved			Approved
HPA	seminal vesicle; glandular cells[â‰¥Medium]	HPA:0430052	3.17541e-05	4.4982	5149	79	60	10877	Enhanced	Approved	Approved	Approved	Approved	Supported		Enhanced	Approved	Supported	Supported				Approved		Supported			Supported	Enhanced	Approved		Supported				Approved			Approved		Approved	Approved					Approved
HPA	lymph node; non-germinal center cells[â‰¥Low]	HPA:0310441	4.37707e-05	4.35882	5969	79	65	10877	Enhanced		Approved	Approved	Approved	Supported		Enhanced	Approved	Supported	Supported	Approved			Approved		Supported	Approved		Supported		Approved		Supported			Approved	Approved	Approved	Approved	Approved		Approved	Approved	Supported				Approved
HPA	ovary	HPA:0340000	4.77636e-05	4.3209	5348	79	61	10877	Enhanced	Approved		Approved	Approved	Supported		Enhanced	Approved	Supported	Supported	Approved			Approved		Supported	Approved		Supported		Approved		Supported			Approved						Approved	Approved		Approved		Approved	Approved
HPA	pancreas; pancreatic endocrine cells[â‰¥Low]	HPA:0351181	6.56317e-05	4.18289	5540	79	62	10877	Enhanced	Approved	Approved	Approved	Approved	Supported		Enhanced		Supported	Supported				Approved		Supported	Approved			Enhanced						Approved			Approved	Approved		Approved	Approved	Supported			Approved	Approved
HPA	tonsil; non-germinal center cells[â‰¥Low]	HPA:0600441	6.74152e-05	4.17124	6022	79	65	10877	Enhanced	Approved	Approved		Approved	Supported		Enhanced		Supported	Supported	Approved			Approved		Supported	Approved		Supported		Approved		Supported			Approved		Approved	Approved	Approved		Approved	Approved	Supported			Approved	Approved
HPA	nasopharynx	HPA:0320000	7.33806e-05	4.13442	7093	79	71	10877	Enhanced	Approved	Approved	Approved	Approved	Supported		Enhanced	Approved	Supported	Supported	Approved			Approved		Supported	Approved		Supported	Enhanced	Approved		Supported			Approved	Approved	Approved	Approved	Approved		Approved	Approved	Supported	Approved
HPA	kidney; cells in tubules[â‰¥Low]	HPA:0270361	7.81585e-05	4.10702	7710	79	74	10877	Enhanced	Approved	Approved	Approved	Approved	Supported		Enhanced	Approved	Supported	Supported	Approved			Approved		Supported	Approved		Supported	Enhanced			Supported			Approved	Approved	Approved	Approved	Approved		Approved	Approved	Supported	Approved		Approved	Approved
HPA	bronchus	HPA:0060000	0.000105958	3.97487	7334	79	72	10877	Enhanced	Approved	Approved	Approved	Approved	Supported		Enhanced	Approved	Supported	Supported	Approved			Approved		Supported			Supported	Enhanced	Approved		Supported			Approved	Approved	Approved	Approved	Approved		Approved	Approved	Supported	Approved			Approved
HPA	tonsil; germinal center cells[â‰¥Medium]	HPA:0600432	0.000109917	3.95894	4037	79	51	10877	Enhanced	Approved	Approved	Approved		Supported		Enhanced		Supported	Supported				Approved		Supported			Supported		Approved		Supported						Approved			Approved		Supported				Approved
HPA	oral mucosa; squamous epithelial cells[â‰¥Medium]	HPA:0330222	0.000109935	3.95887	4303	79	53	10877	Enhanced	Approved	Approved	Approved		Supported		Enhanced		Supported	Supported	Approved			Approved		Supported			Supported		Approved		Supported			Approved	Approved					Approved	Approved		Approved			Approved
HPA	breast; myoepithelial cells[â‰¥Low]	HPA:0050091	0.000113005	3.9469	5607	79	62	10877	Enhanced	Approved	Approved	Approved	Approved	Supported		Enhanced			Supported	Approved					Supported			Supported				Supported					Approved		Approved		Approved	Approved	Supported			Approved	Approved
HPA	skin 1; keratinocytes[â‰¥Low]	HPA:0460661	0.000132929	3.87638	6107	79	65	10877	Enhanced	Approved	Approved	Approved		Supported		Enhanced	Approved	Supported	Supported	Approved			Approved		Supported			Supported	Enhanced			Supported			Approved	Approved		Approved	Approved		Approved	Approved		Approved		Approved	Approved
HPA	kidney	HPA:0270000	0.000138087	3.85985	8002	79	75	10877	Enhanced	Approved	Approved	Approved	Approved	Supported		Enhanced	Approved	Supported	Supported	Approved			Approved		Supported	Approved		Supported	Enhanced	Approved		Supported			Approved	Approved	Approved	Approved	Approved		Approved	Approved	Supported	Approved		Approved	Approved
HPA	salivary gland	HPA:0420000	0.000139727	3.85472	6802	79	69	10877	Enhanced	Approved	Approved	Approved		Supported		Enhanced	Approved	Supported	Supported	Approved			Approved		Supported	Approved		Supported	Enhanced	Approved		Supported			Approved	Approved		Approved	Approved		Approved	Approved	Supported			Approved	Approved
HPA	salivary gland; glandular cells[â‰¥Low]	HPA:0420051	0.000139727	3.85472	6802	79	69	10877	Enhanced	Approved	Approved	Approved		Supported		Enhanced	Approved	Supported	Supported	Approved			Approved		Supported	Approved		Supported	Enhanced	Approved		Supported			Approved	Approved		Approved	Approved		Approved	Approved	Supported			Approved	Approved
HPA	cerebral cortex	HPA:0100000	0.000141482	3.8493	8005	79	75	10877	Enhanced	Approved	Approved	Approved	Approved	Supported		Enhanced	Approved	Supported	Supported	Approved			Approved		Supported	Approved		Supported	Enhanced	Approved		Supported				Approved		Approved	Approved		Approved	Approved	Supported	Approved			Approved
HPA	placenta	HPA:0380000	0.000158815	3.79911	7385	79	72	10877	Enhanced	Approved	Approved	Approved	Approved	Supported		Enhanced		Supported	Supported	Approved			Approved		Supported	Approved		Supported	Enhanced	Approved		Supported			Approved			Approved	Approved		Approved	Approved	Supported	Approved		Approved	Approved
HPA	cervix, uterine	HPA:0110000	0.000182261	3.73931	6836	79	69	10877	Enhanced	Approved	Approved	Approved	Approved	Supported		Enhanced	Approved	Supported	Supported				Approved		Supported	Approved		Supported	Enhanced	Approved		Supported			Approved	Approved			Approved		Approved	Approved	Supported	Approved			Approved
HPA	endometrium 1; glandular cells[â‰¥Medium]	HPA:0160052	0.000183842	3.73555	5066	79	58	10877	Enhanced	Approved	Approved	Approved	Approved	Supported		Enhanced	Approved	Supported	Supported	Approved			Approved		Supported	Approved				Approved					Approved	Approved		Approved	Approved		Approved		Supported				Approved
HPA	skin 2; epidermal cells[â‰¥Medium]	HPA:0470682	0.00019651	3.70661	4787	79	56	10877	Enhanced	Approved	Approved	Approved		Supported		Enhanced	Approved	Supported	Supported	Approved					Supported			Supported				Supported			Approved	Approved			Approved		Approved	Approved	Supported				Approved
HPA	epididymis; glandular cells[â‰¥Low]	HPA:0180051	0.000220265	3.65705	7232	79	71	10877	Enhanced	Approved	Approved	Approved	Approved	Supported		Enhanced	Approved	Supported	Supported	Approved			Approved		Supported	Approved		Supported	Enhanced	Approved		Supported			Approved	Approved			Approved		Approved	Approved	Supported	Approved		Approved	Approved
HPA	epididymis	HPA:0180000	0.000220265	3.65705	7232	79	71	10877	Enhanced	Approved	Approved	Approved	Approved	Supported		Enhanced	Approved	Supported	Supported	Approved			Approved		Supported	Approved		Supported	Enhanced	Approved		Supported			Approved	Approved			Approved		Approved	Approved	Supported	Approved		Approved	Approved
HPA	small intestine; glandular cells[â‰¥Medium]	HPA:0480052	0.000234023	3.63074	6516	79	67	10877	Enhanced	Approved	Approved	Approved	Approved	Supported		Enhanced		Supported	Supported				Approved		Supported	Approved		Supported		Approved		Supported			Approved	Approved		Approved	Approved		Approved	Approved	Supported				Approved
HPA	tonsil; non-germinal center cells[â‰¥Medium]	HPA:0600442	0.000236706	3.62579	4126	79	51	10877	Enhanced	Approved	Approved			Supported		Enhanced		Supported	Supported	Approved			Approved		Supported			Supported		Approved		Supported			Approved		Approved	Approved			Approved	Approved	Supported				Approved
HPA	skin 1; Langerhans[â‰¥Low]	HPA:0460641	0.000242008	3.61617	4672	79	55	10877	Enhanced	Approved	Approved	Approved		Supported		Enhanced	Approved		Supported						Supported	Approved		Supported	Enhanced			Supported				Approved	Approved	Approved			Approved	Approved					Approved
HPA	caudate	HPA:0080000	0.000244611	3.61152	6874	79	69	10877	Enhanced	Approved	Approved	Approved	Approved	Supported		Enhanced		Supported	Supported				Approved		Supported	Approved		Supported	Enhanced	Approved		Supported			Approved			Approved	Approved		Approved	Approved	Supported	Approved			Approved
HPA	skin 1; melanocytes[â‰¥Low]	HPA:0460671	0.00029665	3.52776	5423	79	60	10877	Enhanced	Approved	Approved	Approved	Approved	Supported		Enhanced	Approved		Supported	Approved					Supported			Supported	Enhanced			Supported				Approved	Approved	Approved			Approved	Approved					Approved
HPA	adrenal gland; glandular cells[â‰¥Medium]	HPA:0020052	0.000354018	3.45097	5910	79	63	10877	Enhanced	Approved	Approved	Approved	Approved	Supported		Enhanced	Approved	Supported	Supported				Approved		Supported	Approved			Enhanced	Approved		Supported						Approved	Approved		Approved		Supported			Approved	Approved
HPA	bone marrow; hematopoietic cells[â‰¥Low]	HPA:0040081	0.000370384	3.43135	6406	79	66	10877	Enhanced	Approved	Approved	Approved	Approved	Supported		Enhanced	Approved	Supported	Supported	Approved			Approved		Supported					Approved		Supported			Approved	Approved	Approved	Approved			Approved	Approved	Supported			Approved	Approved
HPA	bone marrow	HPA:0040000	0.000370384	3.43135	6406	79	66	10877	Enhanced	Approved	Approved	Approved	Approved	Supported		Enhanced	Approved	Supported	Supported	Approved			Approved		Supported					Approved		Supported			Approved	Approved	Approved	Approved			Approved	Approved	Supported			Approved	Approved
HPA	prostate; glandular cells[â‰¥Medium]	HPA:0390052	0.000385834	3.4136	4730	79	55	10877	Enhanced		Approved	Approved		Supported		Enhanced	Approved	Supported	Supported				Approved		Supported			Supported	Enhanced			Supported				Approved			Approved		Approved		Supported			Approved	Approved
HPA	ovary; ovarian stroma cells[â‰¥Low]	HPA:0340461	0.000404133	3.39348	3928	79	49	10877	Enhanced			Approved	Approved	Supported		Enhanced	Approved		Supported				Approved		Supported			Supported		Approved		Supported									Approved	Approved				Approved	Approved
HPA	caudate; neuronal cells[â‰¥Medium]	HPA:0080132	0.000413693	3.38332	4061	79	50	10877	Enhanced	Approved	Approved	Approved	Approved	Supported		Enhanced		Supported	Supported				Approved		Supported	Approved			Enhanced									Approved	Approved		Approved	Approved					Approved
HPA	bronchus; respiratory epithelial cells[â‰¥Low]	HPA:0060101	0.000510443	3.29205	6282	79	65	10877	Enhanced	Approved	Approved	Approved	Approved	Supported		Enhanced	Approved	Supported	Supported	Approved			Approved		Supported			Supported		Approved		Supported				Approved	Approved	Approved	Approved		Approved	Approved	Supported				Approved
HPA	spleen	HPA:0530000	0.0005513	3.25861	5811	79	62	10877	Enhanced	Approved	Approved	Approved	Approved	Supported		Enhanced		Supported	Supported	Approved			Approved		Supported	Approved		Supported		Approved		Supported			Approved	Approved		Approved	Approved		Approved	Approved	Supported				Approved
HPA	thyroid gland; glandular cells[â‰¥Medium]	HPA:0590052	0.000556859	3.25425	5505	79	60	10877	Enhanced	Approved	Approved	Approved		Supported		Enhanced	Approved	Supported	Supported				Approved		Supported	Approved		Supported	Enhanced	Approved		Supported			Approved	Approved		Approved	Approved		Approved	Approved					Approved
HPA	pancreas; exocrine glandular cells[â‰¥Medium]	HPA:0350472	0.000577753	3.23826	5212	79	58	10877	Enhanced	Approved	Approved	Approved		Supported		Enhanced		Supported	Supported				Approved		Supported	Approved			Enhanced	Approved		Supported			Approved	Approved		Approved	Approved		Approved	Approved	Supported	Approved			Approved
HPA	nasopharynx; respiratory epithelial cells[â‰¥Low]	HPA:0320101	0.000585563	3.23243	6137	79	64	10877	Enhanced	Approved	Approved	Approved	Approved	Supported		Enhanced	Approved	Supported	Supported	Approved			Approved		Supported	Approved		Supported		Approved		Supported				Approved	Approved	Approved	Approved		Approved	Approved	Supported
HPA	appendix; glandular cells[â‰¥Medium]	HPA:0030052	0.000594263	3.22602	5821	79	62	10877	Enhanced	Approved	Approved	Approved	Approved	Supported		Enhanced		Supported	Supported				Approved		Supported	Approved		Supported	Enhanced	Approved		Supported				Approved		Approved	Approved		Approved	Approved	Supported	Approved			Approved
HPA	oral mucosa; squamous epithelial cells[â‰¥Low]	HPA:0330221	0.000699887	3.15497	6161	79	64	10877	Enhanced	Approved	Approved	Approved		Supported		Enhanced	Approved	Supported	Supported	Approved			Approved		Supported	Approved		Supported		Approved		Supported			Approved	Approved		Approved	Approved		Approved	Approved	Supported	Approved			Approved
HPA	oral mucosa	HPA:0330000	0.000699887	3.15497	6161	79	64	10877	Enhanced	Approved	Approved	Approved		Supported		Enhanced	Approved	Supported	Supported	Approved			Approved		Supported	Approved		Supported		Approved		Supported			Approved	Approved		Approved	Approved		Approved	Approved	Supported	Approved			Approved
HPA	lymph node; germinal center cells[â‰¥Medium]	HPA:0310432	0.000793636	3.10038	3257	79	43	10877	Enhanced		Approved			Supported		Enhanced		Supported	Supported	Approved					Supported			Supported		Approved		Supported			Approved	Approved		Approved			Approved	Approved	Supported				Approved
HPA	epididymis; glandular cells[â‰¥Medium]	HPA:0180052	0.00113858	2.94364	5601	79	60	10877	Enhanced	Approved	Approved	Approved	Approved	Supported		Enhanced	Approved	Supported	Supported	Approved			Approved		Supported			Supported		Approved		Supported			Approved	Approved			Approved		Approved	Approved	Supported				Approved
HPA	pancreas; pancreatic endocrine cells[â‰¥Medium]	HPA:0351182	0.00129648	2.88723	3560	79	45	10877	Enhanced		Approved	Approved		Supported		Enhanced			Supported				Approved		Supported													Approved	Approved		Approved		Supported			Approved	Approved
HPA	parathyroid gland; glandular cells[â‰¥Medium]	HPA:0360052	0.00142072	2.84749	4348	79	51	10877	Enhanced	Approved	Approved	Approved	Approved	Supported		Enhanced		Supported	Supported				Approved		Supported	Approved			Enhanced			Supported			Approved	Approved		Approved	Approved		Approved	Approved	Supported			Approved	Approved
HPA	skin 1; fibroblasts[â‰¥Low]	HPA:0460651	0.00148835	2.8273	4765	79	54	10877	Enhanced	Approved	Approved	Approved		Supported		Enhanced			Supported				Approved		Supported			Supported	Enhanced			Supported			Approved		Approved		Approved		Approved	Approved					Approved
HPA	cerebral cortex; neuronal cells[â‰¥Medium]	HPA:0100132	0.00169372	2.77116	4923	79	55	10877		Approved	Approved	Approved		Supported		Enhanced		Supported	Supported				Approved		Supported	Approved				Approved		Supported						Approved	Approved		Approved	Approved					Approved
HPA	placenta; trophoblastic cells[â‰¥Low]	HPA:0380521	0.00174053	2.75932	6450	79	65	10877	Enhanced	Approved	Approved	Approved	Approved	Supported		Enhanced		Supported	Supported				Approved		Supported	Approved		Supported	Enhanced	Approved		Supported			Approved			Approved	Approved		Approved	Approved	Supported	Approved		Approved	Approved
HPA	cerebral cortex; neuronal cells[â‰¥Low]	HPA:0100131	0.00183449	2.73649	6624	79	66	10877	Enhanced	Approved	Approved	Approved	Approved	Supported		Enhanced		Supported	Supported				Approved		Supported	Approved		Supported	Enhanced	Approved		Supported				Approved		Approved	Approved		Approved	Approved	Supported				Approved
HPA	lung; alveolar cells[â‰¥Low]	HPA:0301171	0.00184194	2.73472	5077	79	56	10877	Enhanced		Approved	Approved	Approved	Supported		Enhanced			Supported	Approved			Approved		Supported			Supported		Approved		Supported			Approved				Approved		Approved	Approved		Approved		Approved	Approved
HPA	bronchus; respiratory epithelial cells[â‰¥Medium]	HPA:0060102	0.00203067	2.69236	5235	79	57	10877	Enhanced	Approved	Approved	Approved		Supported		Enhanced	Approved		Supported				Approved		Supported			Supported		Approved		Supported						Approved	Approved		Approved	Approved	Supported				Approved
HPA	hippocampus; neuronal cells[â‰¥Medium]	HPA:0250132	0.00262054	2.58161	4162	79	49	10877	Enhanced		Approved	Approved	Approved	Supported		Enhanced		Supported	Supported				Approved		Supported	Approved				Approved								Approved	Approved		Approved	Approved	Supported				Approved
HPA	urinary bladder; urothelial cells[â‰¥Medium]	HPA:0610832	0.00267145	2.57325	5873	79	61	10877	Enhanced	Approved	Approved			Supported		Enhanced	Approved		Supported				Approved		Supported			Supported		Approved		Supported			Approved				Approved		Approved	Approved	Supported	Approved			Approved
HPA	duodenum; glandular cells[â‰¥Medium]	HPA:0150052	0.00320547	2.49411	6537	79	65	10877	Enhanced	Approved	Approved	Approved	Approved	Supported		Enhanced	Approved	Supported	Supported				Approved		Supported	Approved		Supported	Enhanced			Supported			Approved	Approved		Approved	Approved		Approved	Approved	Supported	Approved			Approved
HPA	cervix, uterine; glandular cells[â‰¥Low]	HPA:0110051	0.00371528	2.43001	5616	79	59	10877	Enhanced	Approved	Approved	Approved	Approved	Supported		Enhanced		Supported	Supported				Approved		Supported	Approved		Supported		Approved		Supported				Approved			Approved		Approved	Approved	Supported				Approved
HPA	hippocampus; neuronal cells[â‰¥Low]	HPA:0250131	0.00585808	2.23225	6143	79	62	10877	Enhanced	Approved	Approved	Approved	Approved	Supported		Enhanced		Supported	Supported				Approved		Supported	Approved		Supported	Enhanced	Approved								Approved	Approved		Approved	Approved	Supported	Approved			Approved
HPA	breast; glandular cells[High]	HPA:0050053	0.00694857	2.1581	1320	79	23	10877		Approved						Enhanced			Supported						Supported														Approved								Approved
HPA	cervix, uterine; squamous epithelial cells[â‰¥Medium]	HPA:0110222	0.00799488	2.09719	3666	79	44	10877	Enhanced		Approved	Approved		Supported		Enhanced			Supported						Supported			Supported				Supported			Approved						Approved	Approved	Supported				Approved
HPA	appendix; lymphoid tissue[â‰¥Medium]	HPA:0030072	0.00846756	2.07224	3180	79	40	10877	Enhanced	Approved	Approved			Supported		Enhanced			Supported				Approved		Supported					Approved		Supported						Approved	Approved		Approved		Supported				Approved
HPA	liver	HPA:0290000	0.00932824	2.0302	6213	79	62	10877	Enhanced	Approved	Approved	Approved	Approved	Supported		Enhanced	Approved	Supported	Supported				Approved		Supported	Approved		Supported	Enhanced	Approved		Supported				Approved	Approved	Approved	Approved		Approved		Supported	Approved		Approved	Approved
HPA	placenta; decidual cells[â‰¥Low]	HPA:0380511	0.010779	1.96742	4765	79	52	10877		Approved	Approved	Approved	Approved			Enhanced			Supported	Approved			Approved		Supported	Approved		Supported		Approved		Supported						Approved	Approved			Approved		Approved		Approved	Approved
HPA	lung; macrophages[â‰¥Medium]	HPA:0300412	0.0108521	1.96449	4766	79	52	10877	Enhanced	Approved		Approved	Approved	Supported		Enhanced			Supported	Approved			Approved		Supported	Approved		Supported		Approved		Supported						Approved	Approved		Approved	Approved	Supported				Approved
HPA	heart muscle; cardiomyocytes[â‰¥Low]	HPA:0241101	0.0112737	1.94793	6242	79	62	10877	Enhanced	Approved	Approved	Approved	Approved	Supported		Enhanced	Approved	Supported	Supported				Approved		Supported	Approved		Supported	Enhanced	Approved		Supported				Approved			Approved		Approved	Approved	Supported	Approved		Approved	Approved
HPA	heart muscle	HPA:0240000	0.0112737	1.94793	6242	79	62	10877	Enhanced	Approved	Approved	Approved	Approved	Supported		Enhanced	Approved	Supported	Supported				Approved		Supported	Approved		Supported	Enhanced	Approved		Supported				Approved			Approved		Approved	Approved	Supported	Approved		Approved	Approved
HPA	cervix, uterine; glandular cells[â‰¥Medium]	HPA:0110052	0.0116147	1.93499	3973	79	46	10877	Enhanced	Approved	Approved	Approved		Supported		Enhanced			Supported				Approved		Supported	Approved		Supported				Supported				Approved					Approved	Approved	Supported				Approved
HPA	nasopharynx; respiratory epithelial cells[â‰¥Medium]	HPA:0320102	0.012013	1.92035	5061	79	54	10877	Enhanced	Approved	Approved	Approved		Supported		Enhanced	Approved	Supported	Supported	Approved			Approved		Supported			Supported				Supported				Approved			Approved		Approved	Approved
HPA	salivary gland; glandular cells[â‰¥Medium]	HPA:0420052	0.0126689	1.89726	4789	79	52	10877	Enhanced	Approved	Approved	Approved		Supported		Enhanced	Approved	Supported	Supported	Approved			Approved		Supported				Enhanced	Approved		Supported				Approved			Approved		Approved	Approved	Supported			Approved	Approved
HPA	colon; peripheral nerve/ganglion[â‰¥Low]	HPA:0130241	0.0130062	1.88585	5073	79	54	10877	Enhanced	Approved	Approved	Approved	Approved	Supported		Enhanced	Approved	Supported	Supported	Approved			Approved		Supported			Supported		Approved		Supported			Approved	Approved			Approved		Approved	Approved	Supported			Approved
HPA	endometrium 1; cells in endometrial stroma[â‰¥Low]	HPA:0160251	0.0149615	1.82503	4009	79	46	10877	Enhanced			Approved	Approved	Supported		Enhanced			Supported	Approved			Approved		Supported					Approved					Approved		Approved					Approved					Approved
HPA	cervix, uterine; squamous epithelial cells[â‰¥Low]	HPA:0110221	0.0151412	1.81984	5383	79	56	10877	Enhanced	Approved	Approved	Approved		Supported		Enhanced	Approved		Supported				Approved		Supported			Supported	Enhanced			Supported			Approved				Approved		Approved	Approved	Supported	Approved			Approved
HPA	tonsil; non-germinal center cells[High]	HPA:0600443	0.0156812	1.80462	1294	79	22	10877			Approved			Supported		Enhanced			Supported	Approved					Supported							Supported						Approved
HPA	cerebellum	HPA:0090000	0.0160664	1.79408	7114	79	67	10877	Enhanced	Approved	Approved		Approved	Supported		Enhanced	Approved	Supported	Supported				Approved		Supported	Approved		Supported	Enhanced	Approved		Supported			Approved			Approved	Approved		Approved	Approved	Supported	Approved		Approved	Approved
HPA	cerebellum; cells in molecular layer[â‰¥Low]	HPA:0090191	0.0324497	1.48879	4388	79	48	10877	Enhanced		Approved		Approved	Supported		Enhanced	Approved	Supported	Supported				Approved		Supported	Approved			Enhanced	Approved		Supported			Approved			Approved	Approved		Approved		Supported				Approved
HPA	vagina; squamous epithelial cells[â‰¥Medium]	HPA:0620222	0.0324688	1.48853	3993	79	45	10877	Enhanced	Approved		Approved		Supported		Enhanced		Supported	Supported						Supported			Supported				Supported			Approved	Approved			Approved			Approved					Approved
HPA	hippocampus	HPA:0250000	0.0336547	1.47295	6734	79	64	10877	Enhanced	Approved	Approved	Approved	Approved	Supported		Enhanced	Approved	Supported	Supported				Approved		Supported	Approved		Supported	Enhanced	Approved								Approved	Approved		Approved	Approved	Supported	Approved			Approved
HPA	soft tissue 2; chondrocytes[â‰¥Medium]	HPA:0510112	0.0347342	1.45924	728	79	15	10877	Enhanced					Supported		Enhanced	Approved		Supported	Approved						Approved		Supported
HPA	fallopian tube; glandular cells[High]	HPA:0210053	0.0348041	1.45837	1771	79	26	10877	Enhanced		Approved			Supported		Enhanced			Supported						Supported							Supported										Approved
HPA	liver; hepatocytes[â‰¥Low]	HPA:0290401	0.0357881	1.44626	5666	79	57	10877	Enhanced	Approved	Approved	Approved	Approved	Supported		Enhanced	Approved	Supported	Supported				Approved		Supported	Approved		Supported	Enhanced	Approved		Supported				Approved		Approved	Approved		Approved		Supported	Approved		Approved	Approved
HPA	lung; alveolar cells[â‰¥Medium]	HPA:0301172	0.0369357	1.43255	2895	79	36	10877	Enhanced					Supported		Enhanced			Supported	Approved					Supported			Supported		Approved		Supported							Approved			Approved					Approved
HPA	spleen; cells in red pulp[â‰¥Low]	HPA:0530711	0.0398633	1.39943	5249	79	54	10877	Enhanced	Approved	Approved		Approved	Supported		Enhanced			Supported	Approved			Approved		Supported	Approved				Approved		Supported			Approved	Approved		Approved	Approved		Approved	Approved	Supported				Approved
HPA	skin 1; Langerhans[â‰¥Medium]	HPA:0460642	0.0440053	1.35649	3159	79	38	10877	Enhanced	Approved	Approved			Supported		Enhanced			Supported						Supported			Supported				Supported						Approved				Approved					Approved
HPA	soft tissue 2	HPA:0510000	0.0463921	1.33356	5132	79	53	10877	Enhanced	Approved		Approved	Approved	Supported		Enhanced	Approved	Supported	Supported	Approved			Approved		Supported	Approved		Supported	Enhanced	Approved		Supported						Approved	Approved			Approved	Supported				Approved
HPA	colon; endothelial cells[â‰¥Low]	HPA:0130201	0.0464312	1.33319	5709	79	57	10877	Enhanced	Approved	Approved	Approved	Approved	Supported		Enhanced	Approved		Supported	Approved			Approved		Supported			Supported	Enhanced	Approved		Supported				Approved	Approved		Approved				Supported	Approved			Approved
HPA	bone marrow; hematopoietic cells[â‰¥Medium]	HPA:0040082	0.0465854	1.33175	4179	79	46	10877	Enhanced	Approved	Approved	Approved		Supported		Enhanced		Supported	Supported	Approved					Supported							Supported			Approved	Approved		Approved			Approved	Approved	Supported				Approved
HPA	lymph node; non-germinal center cells[â‰¥Medium]	HPA:0310442	0.048613	1.31325	3925	79	44	10877	Enhanced		Approved			Supported		Enhanced			Supported	Approved			Approved		Supported			Supported		Approved		Supported					Approved	Approved					Supported				Approved
CORUM	20S proteasome	CORUM:191	1.515e-10	9.81959	14	76	9	3627	CORUM	CORUM	CORUM			CORUM								CORUM																	CORUM				CORUM				CORUM
CORUM	PA28gamma-20S proteasome	CORUM:194	3.72434e-10	9.42895	15	76	9	3627	CORUM	CORUM	CORUM			CORUM								CORUM																	CORUM				CORUM				CORUM
CORUM	26S proteasome	CORUM:181	8.06293e-10	9.09351	22	76	10	3627	CORUM	CORUM	CORUM			CORUM								CORUM																	CORUM				CORUM				CORUM
CORUM	PA28-20S proteasome	CORUM:192	8.37083e-10	9.07723	16	76	9	3627	CORUM	CORUM	CORUM			CORUM								CORUM																	CORUM				CORUM				CORUM
CORUM	PA700-20S-PA28 complex	CORUM:193	1.10229e-08	7.95771	36	76	11	3627	CORUM	CORUM	CORUM			CORUM								CORUM																	CORUM				CORUM				CORUM
CORUM	CCC complex	CORUM:6645	1.81492e-05	4.74114	13	76	6	3627							CORUM												CORUM																	CORUM				CORUM
CORUM	CCC-Wash (WASH1, FAM21C) complex	CORUM:6639	5.11969e-05	4.29076	15	76	6	3627							CORUM												CORUM																	CORUM				CORUM
CORUM	LSm1-7 complex	CORUM:561	0.00101799	2.99226	7	76	4	3627																							CORUM
CORUM	LSm2-8 complex	CORUM:562	0.00101799	2.99226	7	76	4	3627																							CORUM
CORUM	CCDC93-COMMD1-COMMD6 complex	CORUM:7133	0.00151499	2.81959	3	76	3	3627							CORUM
CORUM	Ubiquilin-proteasome complex	CORUM:5209	0.0289483	1.53838	6	76	3	3627						CORUM								CORUM																	CORUM
CORUM	Prefoldin complex	CORUM:33	0.0289483	1.53838	6	76	3	3627																						CORUM
CORUM	Prefoldin complex	CORUM:112	0.0289483	1.53838	6	76	3	3627																						CORUM
[truncated: 73 more columns]

## Sheet: c.2
# version: e104_eg51_p15_3922dba
# date: 6/25/2021	9:13:22 AM
# organism: hsapiens
# all results: false
# ordered: false
# no iea: false
# sources: GO:MF	GO:BP	GO:CC	KEGG	REAC	WP	TF	MIRNA	HPA	CORUM	HP
# combined: false
# numeric ns: ENTREZGENE_ACC
# domain scope: annotated
# measure underrepresentation: false
# significance threshold method: g_SCS
# user threshold: 0.05
# no evidences: false
# query genes included: query_1<ENSG00000008018	ENSG00000277791	ENSG00000126067	ENSG00000143774	ENSG00000134153	ENSG00000129084	ENSG00000188243	ENSG00000137497	ENSG00000266028	ENSG00000151532	ENSG00000139613	ENSG00000176261	ENSG00000132432	ENSG00000106588	ENSG00000138032	ENSG00000108433	ENSG00000165119	ENSG00000144580	ENSG00000170619	ENSG00000139218	ENSG00000038532	ENSG00000113068	ENSG00000130332	ENSG00000074356	ENSG00000107164	ENSG00000161920	ENSG00000184924	ENSG00000164162	ENSG00000129675	ENSG00000072818	ENSG00000100902	ENSG00000198585	ENSG00000126456	ENSG00000168090	ENSG00000041357	ENSG00000145781	ENSG00000173418	ENSG00000141741	ENSG00000101182	ENSG00000149600	ENSG00000163463	ENSG00000182117	ENSG00000169189	ENSG00000110801	ENSG00000106355	ENSG00000062582	ENSG00000100567	ENSG00000048544	ENSG00000157020	ENSG00000142676
# query genes not included: none
# query genes duplicates: none
source	term_name	term_id	adjusted_p_value	negative_log10_of_adjusted_p_value	term_size	query_size	intersection_size	effective_domain_size	intersections
GO:MF	threonine-type endopeptidase activity	GO:0004298	0.000537733	3.26943	14	111	4	18679	PSMB1,PSMB3,PSMB2,PSMA4
GO:MF	RNA binding	GO:0003723	0.00111175	2.95399	1951	111	29	18679	PSMA1,HNRNPK,SCAF11,LSM7,NCBP3,FUBP3,PSMA6,NUDT16,NOP10,LSM5,MRPS24,RPL11,AIMP1,UPF2,TRA2A,MKRN2,XPO1,RPL37A,ZC3H13,ELOC,LSM6,SRSF7,PSMD4,EIF3G,PCF11,LSM14A,CNOT7,LSM4,TNPO1
GO:MF	threonine-type peptidase activity	GO:0070003	0.00456459	2.3406	23	111	4	18679	PSMB1,PSMB3,PSMB2,PSMA4
GO:BP	mRNA catabolic process	GO:0006402	6.98326e-15	14.1559	388	107	24	18123	PSMB1,PSMB3,PSMB2,PSMA1,PSMA2,CNOT9,LSM7,PSMA6,NUDT16,PSMA4,PSMA7,PSMD9,LSM5,PSMA3,RPL11,CNOT11,UPF2,XPO1,RPL37A,LSM6,PSMD4,CNOT7,LSM4,TNPO1
GO:BP	regulation of mRNA stability	GO:0043488	3.13926e-14	13.5032	247	107	20	18123	PSMB1,PSMB3,PSMB2,PSMA1,PSMA2,CNOT9,LSM7,PSMA6,PSMA4,PSMA7,PSMD9,LSM5,PSMA3,CNOT11,XPO1,LSM6,PSMD4,CNOT7,LSM4,TNPO1
GO:BP	mRNA metabolic process	GO:0016071	5.06238e-14	13.2956	880	107	32	18123	PSMB1,PSMB3,PSMB2,PSMA1,PSMA2,HNRNPK,CNOT9,SCAF11,LSM7,NCBP3,PSMA6,NUDT16,PSMA4,PSMA7,PSMD9,LSM5,PSMA3,RPL11,CNOT11,UPF2,TRA2A,XPO1,RPL37A,ZC3H13,LSM6,SRSF7,PSMD4,PCF11,TSEN34,CNOT7,LSM4,TNPO1
GO:BP	regulation of mRNA catabolic process	GO:0061013	5.87023e-14	13.2313	255	107	20	18123	PSMB1,PSMB3,PSMB2,PSMA1,PSMA2,CNOT9,LSM7,PSMA6,PSMA4,PSMA7,PSMD9,LSM5,PSMA3,CNOT11,XPO1,LSM6,PSMD4,CNOT7,LSM4,TNPO1
GO:BP	regulation of mRNA metabolic process	GO:1903311	7.71952e-14	13.1124	384	107	23	18123	PSMB1,PSMB3,PSMB2,PSMA1,PSMA2,HNRNPK,CNOT9,LSM7,PSMA6,PSMA4,PSMA7,PSMD9,LSM5,PSMA3,CNOT11,TRA2A,XPO1,LSM6,SRSF7,PSMD4,CNOT7,LSM4,TNPO1
GO:BP	RNA catabolic process	GO:0006401	7.72224e-14	13.1123	431	107	24	18123	PSMB1,PSMB3,PSMB2,PSMA1,PSMA2,CNOT9,LSM7,PSMA6,NUDT16,PSMA4,PSMA7,PSMD9,LSM5,PSMA3,RPL11,CNOT11,UPF2,XPO1,RPL37A,LSM6,PSMD4,CNOT7,LSM4,TNPO1
GO:BP	regulation of RNA stability	GO:0043487	7.96277e-14	13.0989	259	107	20	18123	PSMB1,PSMB3,PSMB2,PSMA1,PSMA2,CNOT9,LSM7,PSMA6,PSMA4,PSMA7,PSMD9,LSM5,PSMA3,CNOT11,XPO1,LSM6,PSMD4,CNOT7,LSM4,TNPO1
GO:BP	proteasomal ubiquitin-independent protein catabolic process	GO:0010499	7.86308e-12	11.1044	23	107	9	18123	PSMB1,PSMB3,PSMB2,PSMA1,PSMA2,PSMA6,PSMA4,PSMA7,PSMA3
GO:BP	regulation of hematopoietic stem cell differentiation	GO:1902036	2.56911e-11	10.5902	74	107	12	18123	PSMB1,PSMB3,PSMB2,PSMA1,PSMA2,PSMA6,PSMA4,PSMA7,PSMD9,PSMA3,PSMD4,CBFB
GO:BP	nucleobase-containing compound catabolic process	GO:0034655	4.45736e-11	10.3509	573	107	24	18123	PSMB1,PSMB3,PSMB2,PSMA1,PSMA2,CNOT9,LSM7,PSMA6,NUDT16,PSMA4,PSMA7,PSMD9,LSM5,PSMA3,RPL11,CNOT11,UPF2,XPO1,RPL37A,LSM6,PSMD4,CNOT7,LSM4,TNPO1
GO:BP	regulation of transcription from RNA polymerase II promoter in response to hypoxia	GO:0061418	4.9868e-11	10.3022	78	107	12	18123	PSMB1,PSMB3,PSMB2,PSMA1,PSMA2,PSMA6,PSMA4,PSMA7,PSMD9,PSMA3,ELOC,PSMD4
GO:BP	anaphase-promoting complex-dependent catabolic process	GO:0031145	1.94937e-10	9.71011	87	107	12	18123	PSMB1,PSMB3,PSMB2,PSMA1,PSMA2,ANAPC10,PSMA6,PSMA4,PSMA7,PSMD9,PSMA3,PSMD4
GO:BP	heterocycle catabolic process	GO:0046700	2.23353e-10	9.65101	617	107	24	18123	PSMB1,PSMB3,PSMB2,PSMA1,PSMA2,CNOT9,LSM7,PSMA6,NUDT16,PSMA4,PSMA7,PSMD9,LSM5,PSMA3,RPL11,CNOT11,UPF2,XPO1,RPL37A,LSM6,PSMD4,CNOT7,LSM4,TNPO1
GO:BP	pre-replicative complex assembly	GO:0036388	2.45239e-10	9.61041	66	107	11	18123	PSMB1,PSMB3,PSMB2,PSMA1,PSMA2,PSMA6,PSMA4,PSMA7,PSMD9,PSMA3,PSMD4
GO:BP	regulation of cellular amino acid metabolic process	GO:0006521	2.45239e-10	9.61041	66	107	11	18123	PSMB1,PSMB3,PSMB2,PSMA1,PSMA2,PSMA6,PSMA4,PSMA7,PSMD9,PSMA3,PSMD4
GO:BP	hematopoietic stem cell differentiation	GO:0060218	2.58369e-10	9.58776	89	107	12	18123	PSMB1,PSMB3,PSMB2,PSMA1,PSMA2,PSMA6,PSMA4,PSMA7,PSMD9,PSMA3,PSMD4,CBFB
GO:BP	cellular nitrogen compound catabolic process	GO:0044270	2.75402e-10	9.56003	623	107	24	18123	PSMB1,PSMB3,PSMB2,PSMA1,PSMA2,CNOT9,LSM7,PSMA6,NUDT16,PSMA4,PSMA7,PSMD9,LSM5,PSMA3,RPL11,CNOT11,UPF2,XPO1,RPL37A,LSM6,PSMD4,CNOT7,LSM4,TNPO1
GO:BP	regulation of hematopoietic progenitor cell differentiation	GO:1901532	3.40078e-10	9.46842	91	107	12	18123	PSMB1,PSMB3,PSMB2,PSMA1,PSMA2,PSMA6,PSMA4,PSMA7,PSMD9,PSMA3,PSMD4,CBFB
GO:BP	aromatic compound catabolic process	GO:0019439	4.30178e-10	9.36635	636	107	24	18123	PSMB1,PSMB3,PSMB2,PSMA1,PSMA2,CNOT9,LSM7,PSMA6,NUDT16,PSMA4,PSMA7,PSMD9,LSM5,PSMA3,RPL11,CNOT11,UPF2,XPO1,RPL37A,LSM6,PSMD4,CNOT7,LSM4,TNPO1
GO:BP	antigen processing and presentation of peptide antigen via MHC class I	GO:0002474	9.58361e-10	9.01847	99	107	12	18123	PSMB1,PSMB3,PSMB2,PSMA1,PSMA2,PSMA6,PSMA4,PSMA7,PSMD9,PSMA3,SEC13,PSMD4
GO:BP	antigen processing and presentation of exogenous peptide antigen via MHC class I, TAP-dependent	GO:0002479	1.07037e-09	8.97047	75	107	11	18123	PSMB1,PSMB3,PSMB2,PSMA1,PSMA2,PSMA6,PSMA4,PSMA7,PSMD9,PSMA3,PSMD4
GO:BP	organic cyclic compound catabolic process	GO:1901361	1.08554e-09	8.96435	664	107	24	18123	PSMB1,PSMB3,PSMB2,PSMA1,PSMA2,CNOT9,LSM7,PSMA6,NUDT16,PSMA4,PSMA7,PSMD9,LSM5,PSMA3,RPL11,CNOT11,UPF2,XPO1,RPL37A,LSM6,PSMD4,CNOT7,LSM4,TNPO1
GO:BP	interleukin-1-mediated signaling pathway	GO:0070498	1.96522e-09	8.70659	105	107	12	18123	PSMB1,PSMB3,PSMB2,PSMA1,PSMA2,PSMA6,PSMA4,PSMA7,PSMD9,PSMA3,NFKB1,PSMD4
GO:BP	antigen processing and presentation of exogenous peptide antigen via MHC class I	GO:0042590	2.23446e-09	8.65083	80	107	11	18123	PSMB1,PSMB3,PSMB2,PSMA1,PSMA2,PSMA6,PSMA4,PSMA7,PSMD9,PSMA3,PSMD4
GO:BP	regulation of cellular amine metabolic process	GO:0033238	3.39241e-09	8.46949	83	107	11	18123	PSMB1,PSMB3,PSMB2,PSMA1,PSMA2,PSMA6,PSMA4,PSMA7,PSMD9,PSMA3,PSMD4
GO:BP	regulation of cellular catabolic process	GO:0031329	3.46665e-09	8.46009	913	107	27	18123	PSMB1,PSMB3,PSMB2,PSMA1,PSMA2,CNOT9,CLEC16A,LSM7,PSMA6,PSMA4,PSMA7,PSMD9,LSM5,PSMA3,RPL11,UBE2V2,CNOT11,PPP1CA,SNX6,XPO1,COMMD1,LSM6,PSMD4,CHMP4B,CNOT7,LSM4,TNPO1
GO:BP	regulation of transcription from RNA polymerase II promoter in response to stress	GO:0043618	3.8569e-09	8.41376	111	107	12	18123	PSMB1,PSMB3,PSMB2,PSMA1,PSMA2,PSMA6,PSMA4,PSMA7,PSMD9,PSMA3,ELOC,PSMD4
GO:BP	stimulatory C-type lectin receptor signaling pathway	GO:0002223	4.29876e-09	8.36666	112	107	12	18123	PSMB1,PSMB3,PSMB2,PSMA1,PSMA2,PSMA6,PSMA4,PSMA7,PSMD9,PSMA3,NFKB1,PSMD4
GO:BP	cellular response to lectin	GO:1990858	4.78617e-09	8.32001	113	107	12	18123	PSMB1,PSMB3,PSMB2,PSMA1,PSMA2,PSMA6,PSMA4,PSMA7,PSMD9,PSMA3,NFKB1,PSMD4
GO:BP	response to lectin	GO:1990840	4.78617e-09	8.32001	113	107	12	18123	PSMB1,PSMB3,PSMB2,PSMA1,PSMA2,PSMA6,PSMA4,PSMA7,PSMD9,PSMA3,NFKB1,PSMD4
GO:BP	regulation of stem cell differentiation	GO:2000736	5.91464e-09	8.22807	115	107	12	18123	PSMB1,PSMB3,PSMB2,PSMA1,PSMA2,PSMA6,PSMA4,PSMA7,PSMD9,PSMA3,PSMD4,CBFB
GO:BP	innate immune response activating cell surface receptor signaling pathway	GO:0002220	5.91464e-09	8.22807	115	107	12	18123	PSMB1,PSMB3,PSMB2,PSMA1,PSMA2,PSMA6,PSMA4,PSMA7,PSMD9,PSMA3,NFKB1,PSMD4
GO:BP	innate immune response-activating signal transduction	GO:0002758	6.56509e-09	8.18276	116	107	12	18123	PSMB1,PSMB3,PSMB2,PSMA1,PSMA2,PSMA6,PSMA4,PSMA7,PSMD9,PSMA3,NFKB1,PSMD4
GO:BP	regulation of DNA-templated transcription in response to stress	GO:0043620	7.27989e-09	8.13788	117	107	12	18123	PSMB1,PSMB3,PSMB2,PSMA1,PSMA2,PSMA6,PSMA4,PSMA7,PSMD9,PSMA3,ELOC,PSMD4
GO:BP	positive regulation of canonical Wnt signaling pathway	GO:0090263	1.00868e-08	7.99624	153	107	13	18123	PSMB1,PSMB3,PSMB2,PSMA1,PSMA2,PPM1B,PSMA6,PSMA4,PSMA7,PSMD9,PSMA3,NFKB1,PSMD4
GO:BP	SCF-dependent proteasomal ubiquitin-dependent protein catabolic process	GO:0031146	1.54775e-08	7.8103	95	107	11	18123	PSMB1,PSMB3,PSMB2,PSMA1,PSMA2,PSMA6,PSMA4,PSMA7,PSMD9,PSMA3,PSMD4
GO:BP	negative regulation of G2/M transition of mitotic cell cycle	GO:0010972	2.45027e-08	7.61079	99	107	11	18123	PSMB1,PSMB3,PSMB2,PSMA1,PSMA2,PSMA6,PSMA4,PSMA7,PSMD9,PSMA3,PSMD4
GO:BP	regulation of catabolic process	GO:0009894	2.91992e-08	7.53463	1081	107	28	18123	PSMB1,PSMB3,PSMB2,PSMA1,PSMA2,CNOT9,CLEC16A,LSM7,PSMA6,PSMA4,PSMA7,PSMD9,LSM5,PSMA3,SEC13,RPL11,UBE2V2,CNOT11,PPP1CA,SNX6,XPO1,COMMD1,LSM6,PSMD4,CHMP4B,CNOT7,LSM4,TNPO1
GO:BP	negative regulation of cell cycle G2/M phase transition	GO:1902750	3.05962e-08	7.51433	101	107	11	18123	PSMB1,PSMB3,PSMB2,PSMA1,PSMA2,PSMA6,PSMA4,PSMA7,PSMD9,PSMA3,PSMD4
GO:BP	negative regulation of mitotic cell cycle phase transition	GO:1901991	5.80975e-08	7.23584	260	107	15	18123	PSMB1,PSMB3,PSMB2,PSMA1,PSMA2,CNOT9,PSMA6,PSMA4,PSMA7,PSMD9,PSMA3,CNOT11,PSMD4,CNOT7,ARID3A
GO:BP	positive regulation of innate immune response	GO:0045089	6.21425e-08	7.20661	217	107	14	18123	PSMB1,PSMB3,PSMB2,PSMA1,PSMA2,PSMA6,IRF3,PSMA4,PSMA7,PSMD9,PSMA3,NFKB1,PSMD4,LSM14A
GO:BP	negative regulation of gene expression	GO:0010629	6.9434e-08	7.15843	1470	107	32	18123	PSMB1,PSMB3,PSMB2,PSMA1,PSMA2,PPM1B,HNRNPK,CNOT9,LSM7,PSMA6,NUDT16,IRF3,PSMA4,PSMA7,PSMD9,LSM5,PSMA3,SEC13,RPL11,NUTF2,CNOT11,UPF2,NFKB1,XPO1,RPL37A,LSM6,SRSF7,PSMD4,LSM14A,CNOT7,LSM4,TNPO1
GO:BP	Wnt signaling pathway, planar cell polarity pathway	GO:0060071	7.85465e-08	7.10487	110	107	11	18123	PSMB1,PSMB3,PSMB2,PSMA1,PSMA2,PSMA6,PSMA4,PSMA7,PSMD9,PSMA3,PSMD4
GO:BP	activation of innate immune response	GO:0002218	8.63073e-08	7.06395	144	107	12	18123	PSMB1,PSMB3,PSMB2,PSMA1,PSMA2,PSMA6,PSMA4,PSMA7,PSMD9,PSMA3,NFKB1,PSMD4
GO:BP	regulation of establishment of planar polarity	GO:0090175	1.16257e-07	6.93458	114	107	11	18123	PSMB1,PSMB3,PSMB2,PSMA1,PSMA2,PSMA6,PSMA4,PSMA7,PSMD9,PSMA3,PSMD4
GO:BP	positive regulation of Wnt signaling pathway	GO:0030177	1.19747e-07	6.92174	186	107	13	18123	PSMB1,PSMB3,PSMB2,PSMA1,PSMA2,PPM1B,PSMA6,PSMA4,PSMA7,PSMD9,PSMA3,NFKB1,PSMD4
GO:BP	cellular macromolecule catabolic process	GO:0044265	1.47084e-07	6.83243	1244	107	29	18123	PSMB1,PSMB3,PSMB2,PSMA1,PSMA2,CNOT9,LSM7,ANAPC10,PSMA6,NUDT16,PSMA4,PSMA7,PSMD9,LSM5,PSMA3,RPL11,UBE2V2,CNOT11,UPF2,XPO1,RPL37A,COMMD1,ELOC,LSM6,PSMD4,CHMP4B,CNOT7,LSM4,TNPO1
GO:BP	positive regulation of response to biotic stimulus	GO:0002833	4.76431e-07	6.322	253	107	14	18123	PSMB1,PSMB3,PSMB2,PSMA1,PSMA2,PSMA6,IRF3,PSMA4,PSMA7,PSMD9,PSMA3,NFKB1,PSMD4,LSM14A
GO:BP	establishment of tissue polarity	GO:0007164	4.85644e-07	6.31368	130	107	11	18123	PSMB1,PSMB3,PSMB2,PSMA1,PSMA2,PSMA6,PSMA4,PSMA7,PSMD9,PSMA3,PSMD4
GO:BP	establishment of planar polarity	GO:0001736	4.85644e-07	6.31368	130	107	11	18123	PSMB1,PSMB3,PSMB2,PSMA1,PSMA2,PSMA6,PSMA4,PSMA7,PSMD9,PSMA3,PSMD4
GO:BP	Fc-epsilon receptor signaling pathway	GO:0038095	4.88116e-07	6.31148	167	107	12	18123	PSMB1,PSMB3,PSMB2,PSMA1,PSMA2,PSMA6,PSMA4,PSMA7,PSMD9,PSMA3,NFKB1,PSMD4
GO:BP	gene expression	GO:0010467	8.05741e-07	6.0938	6192	107	68	18123	PSMB1,PSMB3,PSMB2,PSMA1,COMMD6,SMARCC2,ZBTB8OS,PSMA2,PPM1B,HNRNPK,CNOT9,SCAF11,LSM7,NCBP3,FUBP3,MED11,PSMA6,NUDT16,IRF3,PSMA4,NAA20,PSMA7,COMMD7,NOP10,PSMD9,LSM5,MRPS24,PSMA3,MRPS10,SEC13,RPL11,NUTF2,MRPL34,ELP6,CNOT11,INTS12,AIMP1,PPP1CA,MED30,PIH1D1,UPF2,TRA2A,NFKB1,SNX6,XPO1,RPL37A,ZC3H13,COMMD1,ELOC,ZNF143,GTF2A1,LSM6,SRSF7,PSMD4,EIF3G,NAA10,PCF11,LSM14A,TSEN34,MED17,CBFB,MRPL55,CNOT7,LSM4,AR…
GO:BP	hematopoietic progenitor cell differentiation	GO:0002244	8.38841e-07	6.07632	175	107	12	18123	PSMB1,PSMB3,PSMB2,PSMA1,PSMA2,PSMA6,PSMA4,PSMA7,PSMD9,PSMA3,PSMD4,CBFB
GO:BP	antigen processing and presentation of exogenous peptide antigen	GO:0002478	8.38841e-07	6.07632	175	107	12	18123	PSMB1,PSMB3,PSMB2,PSMA1,PSMA2,PSMA6,PSMA4,PSMA7,PSMD9,PSMA3,SEC13,PSMD4
GO:BP	regulation of innate immune response	GO:0045088	8.91078e-07	6.05008	316	107	15	18123	PSMB1,PSMB3,PSMB2,PSMA1,PSMA2,PSMA6,IRF3,PSMA4,PSMA7,PSMD9,PSMA3,NFKB1,PSMD4,LSM14A,CNOT7
GO:BP	negative regulation of mitotic cell cycle	GO:0045930	9.72223e-07	6.01223	318	107	15	18123	PSMB1,PSMB3,PSMB2,PSMA1,PSMA2,CNOT9,PSMA6,PSMA4,PSMA7,PSMD9,PSMA3,CNOT11,PSMD4,CNOT7,ARID3A
GO:BP	tumor necrosis factor-mediated signaling pathway	GO:0033209	1.08849e-06	5.96317	179	107	12	18123	PSMB1,PSMB3,PSMB2,PSMA1,PSMA2,PSMA6,PSMA4,PSMA7,COMMD7,PSMD9,PSMA3,PSMD4
GO:BP	mitotic cell cycle	GO:0000278	1.25578e-06	5.90109	1098	107	26	18123	PSMB1,PSMB3,PSMB2,PSMA1,NUMA1,PSMA2,CNOT9,ANAPC10,PSMA6,PSMA4,PSMA7,PSMD9,PSMA3,SEC13,NEDD1,CNOT11,TUBA1C,CENPC,XPO1,TUBB8,PSMD4,NAA10,LSM14A,CHMP4B,CNOT7,ARID3A
GO:BP	antigen processing and presentation of exogenous antigen	GO:0019884	1.40345e-06	5.8528	183	107	12	18123	PSMB1,PSMB3,PSMB2,PSMA1,PSMA2,PSMA6,PSMA4,PSMA7,PSMD9,PSMA3,SEC13,PSMD4
GO:BP	negative regulation of cell cycle phase transition	GO:1901988	1.55314e-06	5.80879	329	107	15	18123	PSMB1,PSMB3,PSMB2,PSMA1,PSMA2,CNOT9,PSMA6,PSMA4,PSMA7,PSMD9,PSMA3,CNOT11,PSMD4,CNOT7,ARID3A
GO:BP	cellular response to interleukin-1	GO:0071347	1.79853e-06	5.74508	187	107	12	18123	PSMB1,PSMB3,PSMB2,PSMA1,PSMA2,PSMA6,PSMA4,PSMA7,PSMD9,PSMA3,NFKB1,PSMD4
GO:BP	macromolecule catabolic process	GO:0009057	1.84616e-06	5.73373	1479	107	30	18123	PSMB1,PSMB3,PSMB2,PSMA1,PSMA2,CNOT9,LSM7,ANAPC10,PSMA6,NUDT16,PSMA4,PSMA7,PSMD9,LSM5,PSMA3,RPL11,UBE2V2,CNOT11,PPP1CA,UPF2,XPO1,RPL37A,COMMD1,ELOC,LSM6,PSMD4,CHMP4B,CNOT7,LSM4,TNPO1
GO:BP	mitotic cell cycle process	GO:1903047	2.04628e-06	5.68903	956	107	24	18123	PSMB1,PSMB3,PSMB2,PSMA1,NUMA1,PSMA2,CNOT9,ANAPC10,PSMA6,PSMA4,PSMA7,PSMD9,PSMA3,SEC13,NEDD1,CNOT11,CENPC,XPO1,PSMD4,NAA10,LSM14A,CHMP4B,CNOT7,ARID3A
GO:BP	regulation of mitotic cell cycle phase transition	GO:1901990	2.11042e-06	5.67563	453	107	17	18123	PSMB1,PSMB3,PSMB2,PSMA1,PSMA2,CNOT9,ANAPC10,PSMA6,PSMA4,PSMA7,PSMD9,PSMA3,NEDD1,CNOT11,PSMD4,CNOT7,ARID3A
GO:BP	non-canonical Wnt signaling pathway	GO:0035567	2.42154e-06	5.61591	151	107	11	18123	PSMB1,PSMB3,PSMB2,PSMA1,PSMA2,PSMA6,PSMA4,PSMA7,PSMD9,PSMA3,PSMD4
GO:BP	antigen processing and presentation of peptide antigen	GO:0048002	2.58095e-06	5.58822	193	107	12	18123	PSMB1,PSMB3,PSMB2,PSMA1,PSMA2,PSMA6,PSMA4,PSMA7,PSMD9,PSMA3,SEC13,PSMD4
GO:BP	morphogenesis of a polarized epithelium	GO:0001738	2.59774e-06	5.5854	152	107	11	18123	PSMB1,PSMB3,PSMB2,PSMA1,PSMA2,PSMA6,PSMA4,PSMA7,PSMD9,PSMA3,PSMD4
GO:BP	negative regulation of cell cycle process	GO:0010948	2.7235e-06	5.56487	400	107	16	18123	PSMB1,PSMB3,PSMB2,PSMA1,PSMA2,CNOT9,PSMA6,PSMA4,PSMA7,PSMD9,PSMA3,CNOT11,PSMD4,NAA10,CNOT7,ARID3A
GO:BP	regulation of cell cycle process	GO:0010564	3.00668e-06	5.52191	815	107	22	18123	PSMB1,PSMB3,PSMB2,PSMA1,NUMA1,PSMA2,CNOT9,ANAPC10,PSMA6,NUDT16,PSMA4,PSMA7,PSMD9,PSMA3,NEDD1,CNOT11,XPO1,PSMD4,NAA10,CHMP4B,CNOT7,ARID3A
GO:BP	NIK/NF-kappaB signaling	GO:0038061	3.07741e-06	5.51181	196	107	12	18123	PSMB1,PSMB3,PSMB2,PSMA1,PSMA2,PPM1B,PSMA6,PSMA4,PSMA7,PSMD9,PSMA3,PSMD4
GO:BP	protein ubiquitination	GO:0016567	3.44673e-06	5.46259	900	107	23	18123	PSMB1,PSMB3,PSMB2,PSMA1,PSMA2,MED11,ANAPC10,PSMA6,PSMA4,PSMA7,NSMCE1,PSMD9,PSMA3,RPL11,WDR48,UBE2V2,MED30,KCMF1,MKRN2,COMMD1,ELOC,PSMD4,CBFB
GO:BP	T cell receptor signaling pathway	GO:0050852	4.33663e-06	5.36285	202	107	12	18123	PSMB1,PSMB3,PSMB2,PSMA1,PSMA2,PSMA6,PSMA4,PSMA7,PSMD9,PSMA3,NFKB1,PSMD4
GO:BP	cellular nitrogen compound metabolic process	GO:0034641	4.48197e-06	5.34853	6576	107	69	18123	PSMB1,PSMB3,PSMB2,GUK1,PSMA1,COMMD6,SMARCC2,ZBTB8OS,PSMA2,HNRNPK,CNOT9,SCAF11,LSM7,NCBP3,FUBP3,MED11,PSMA6,NUDT16,IRF3,COPS6,PSMA4,PSMA7,COMMD7,NOP10,NSMCE1,PSMD9,LSM5,MRPS24,PSMA3,MRPS10,SEC13,RPL11,WDR48,UBE2V2,MRPL34,ELP6,CNOT11,INTS12,AIMP1,PPP1CA,MED30,PIH1D1,UPF2,TRA2A,NFKB1,SNX6,XPO1,RPL37A,ZC3H13,COMMD1,ELOC,ZNF143,GTF2A1,LSM6,SRSF7,PSMD4,EIF3G,PCF11,LSM14A,TSEN34,MED17,CBFB,MRPL55,CNOT7,…
GO:BP	regulation of canonical Wnt signaling pathway	GO:0060828	4.75994e-06	5.3224	302	107	14	18123	PSMB1,PSMB3,PSMB2,PSMA1,PSMA2,PPM1B,PSMA6,PSMA4,PSMA7,PSMD9,PSMA3,PPP1CA,NFKB1,PSMD4
GO:BP	regulation of G2/M transition of mitotic cell cycle	GO:0010389	4.84966e-06	5.31429	204	107	12	18123	PSMB1,PSMB3,PSMB2,PSMA1,PSMA2,PSMA6,PSMA4,PSMA7,PSMD9,PSMA3,NEDD1,PSMD4
GO:BP	posttranscriptional regulation of gene expression	GO:0010608	6.17718e-06	5.20921	928	107	23	18123	PSMB1,PSMB3,PSMB2,PSMA1,PSMA2,CNOT9,LSM7,PSMA6,PSMA4,PSMA7,PSMD9,LSM5,PSMA3,SEC13,CNOT11,PPP1CA,XPO1,LSM6,PSMD4,LSM14A,CNOT7,LSM4,TNPO1
GO:BP	cellular amine metabolic process	GO:0044106	6.60232e-06	5.1803	166	107	11	18123	PSMB1,PSMB3,PSMB2,PSMA1,PSMA2,PSMA6,PSMA4,PSMA7,PSMD9,PSMA3,PSMD4
GO:BP	regulation of response to biotic stimulus	GO:0002831	6.7084e-06	5.17338	426	107	16	18123	PSMB1,PSMB3,PSMB2,PSMA1,PSMA2,PPM1B,PSMA6,IRF3,PSMA4,PSMA7,PSMD9,PSMA3,NFKB1,PSMD4,LSM14A,CNOT7
GO:BP	regulation of cell cycle G2/M phase transition	GO:1902749	7.90356e-06	5.10218	213	107	12	18123	PSMB1,PSMB3,PSMB2,PSMA1,PSMA2,PSMA6,PSMA4,PSMA7,PSMD9,PSMA3,NEDD1,PSMD4
GO:BP	cellular response to hypoxia	GO:0071456	8.33238e-06	5.07923	214	107	12	18123	PSMB1,PSMB3,PSMB2,PSMA1,PSMA2,PSMA6,PSMA4,PSMA7,PSMD9,PSMA3,ELOC,PSMD4
GO:BP	amine metabolic process	GO:0009308	9.02101e-06	5.04475	171	107	11	18123	PSMB1,PSMB3,PSMB2,PSMA1,PSMA2,PSMA6,PSMA4,PSMA7,PSMD9,PSMA3,PSMD4
GO:BP	response to interleukin-1	GO:0070555	9.74745e-06	5.01111	217	107	12	18123	PSMB1,PSMB3,PSMB2,PSMA1,PSMA2,PSMA6,PSMA4,PSMA7,PSMD9,PSMA3,NFKB1,PSMD4
GO:BP	regulation of Wnt signaling pathway	GO:0030111	1.10224e-05	4.95772	380	107	15	18123	PSMB1,PSMB3,PSMB2,PSMA1,PSMA2,PPM1B,PSMA6,PSMA4,PSMA7,PSMD9,PSMA3,PPP1CA,NFKB1,PSMD4,CBFB
GO:BP	proteasome-mediated ubiquitin-dependent protein catabolic process	GO:0043161	1.13226e-05	4.94605	442	107	16	18123	PSMB1,PSMB3,PSMB2,PSMA1,PSMA2,ANAPC10,PSMA6,PSMA4,PSMA7,PSMD9,PSMA3,RPL11,UBE2V2,XPO1,COMMD1,PSMD4
GO:BP	protein-containing complex subunit organization	GO:0043933	1.2611e-05	4.89925	2017	107	34	18123	PSMB1,PSMB3,PSMB2,PSMA1,NUMA1,SMARCC2,PSMA2,GOSR2,SCAF11,CLEC16A,PSMA6,PSMA4,PSMA7,PSMD9,MRPS24,PSMA3,MRPS10,SEC13,RPL11,MRPL34,PFDN6,CENPC,PPP1CA,VMA21,PIH1D1,VBP1,NDUFAF3,PSMD4,EIF3G,CHMP4B,ARPC5L,MRPL55,LSM4,MRPS18B
GO:BP	cellular response to decreased oxygen levels	GO:0036294	1.39255e-05	4.85619	224	107	12	18123	PSMB1,PSMB3,PSMB2,PSMA1,PSMA2,PSMA6,PSMA4,PSMA7,PSMD9,PSMA3,ELOC,PSMD4
GO:BP	mitotic cell cycle phase transition	GO:0044772	1.61596e-05	4.79157	588	107	18	18123	PSMB1,PSMB3,PSMB2,PSMA1,PSMA2,CNOT9,ANAPC10,PSMA6,PSMA4,PSMA7,PSMD9,PSMA3,NEDD1,CNOT11,PSMD4,CHMP4B,CNOT7,ARID3A
GO:BP	protein modification by small protein conjugation	GO:0032446	1.72532e-05	4.76313	980	107	23	18123	PSMB1,PSMB3,PSMB2,PSMA1,PSMA2,MED11,ANAPC10,PSMA6,PSMA4,PSMA7,NSMCE1,PSMD9,PSMA3,RPL11,WDR48,UBE2V2,MED30,KCMF1,MKRN2,COMMD1,ELOC,PSMD4,CBFB
GO:BP	nucleic acid metabolic process	GO:0090304	1.84878e-05	4.73312	5234	107	59	18123	PSMB1,PSMB3,PSMB2,PSMA1,COMMD6,SMARCC2,ZBTB8OS,PSMA2,HNRNPK,CNOT9,SCAF11,LSM7,NCBP3,FUBP3,MED11,PSMA6,NUDT16,IRF3,COPS6,PSMA4,PSMA7,COMMD7,NOP10,NSMCE1,PSMD9,LSM5,PSMA3,RPL11,WDR48,UBE2V2,ELP6,CNOT11,INTS12,AIMP1,MED30,PIH1D1,UPF2,TRA2A,NFKB1,SNX6,XPO1,RPL37A,ZC3H13,COMMD1,ELOC,ZNF143,GTF2A1,LSM6,SRSF7,PSMD4,PCF11,TSEN34,MED17,CBFB,CNOT7,LSM4,ARID3A,MED22,TNPO1
GO:BP	regulation of animal organ morphogenesis	GO:2000027	2.05356e-05	4.68749	185	107	11	18123	PSMB1,PSMB3,PSMB2,PSMA1,PSMA2,PSMA6,PSMA4,PSMA7,PSMD9,PSMA3,PSMD4
GO:BP	protein polyubiquitination	GO:0000209	2.4067e-05	4.61858	343	107	14	18123	PSMB1,PSMB3,PSMB2,PSMA1,PSMA2,ANAPC10,PSMA6,PSMA4,PSMA7,PSMD9,PSMA3,UBE2V2,PSMD4,CBFB
GO:BP	antigen processing and presentation	GO:0019882	2.4952e-05	4.60289	236	107	12	18123	PSMB1,PSMB3,PSMB2,PSMA1,PSMA2,PSMA6,PSMA4,PSMA7,PSMD9,PSMA3,SEC13,PSMD4
GO:BP	negative regulation of canonical Wnt signaling pathway	GO:0090090	2.56482e-05	4.59094	189	107	11	18123	PSMB1,PSMB3,PSMB2,PSMA1,PSMA2,PSMA6,PSMA4,PSMA7,PSMD9,PSMA3,PSMD4
GO:BP	protein-DNA complex subunit organization	GO:0071824	2.68582e-05	4.57092	346	107	14	18123	PSMB1,PSMB3,PSMB2,PSMA1,SMARCC2,PSMA2,PSMA6,PSMA4,PSMA7,PSMD9,PSMA3,CENPC,PIH1D1,PSMD4
GO:BP	Fc receptor signaling pathway	GO:0038093	2.74098e-05	4.56209	238	107	12	18123	PSMB1,PSMB3,PSMB2,PSMA1,PSMA2,PSMA6,PSMA4,PSMA7,PSMD9,PSMA3,NFKB1,PSMD4
GO:BP	RNA metabolic process	GO:0016070	2.83779e-05	4.54702	4714	107	55	18123	PSMB1,PSMB3,PSMB2,PSMA1,COMMD6,SMARCC2,ZBTB8OS,PSMA2,HNRNPK,CNOT9,SCAF11,LSM7,NCBP3,FUBP3,MED11,PSMA6,NUDT16,IRF3,PSMA4,PSMA7,COMMD7,NOP10,PSMD9,LSM5,PSMA3,RPL11,ELP6,CNOT11,INTS12,AIMP1,MED30,PIH1D1,UPF2,TRA2A,NFKB1,SNX6,XPO1,RPL37A,ZC3H13,COMMD1,ELOC,ZNF143,GTF2A1,LSM6,SRSF7,PSMD4,PCF11,TSEN34,MED17,CBFB,CNOT7,LSM4,ARID3A,MED22,TNPO1
GO:BP	canonical Wnt signaling pathway	GO:0060070	2.99404e-05	4.52374	349	107	14	18123	PSMB1,PSMB3,PSMB2,PSMA1,PSMA2,PPM1B,PSMA6,PSMA4,PSMA7,PSMD9,PSMA3,PPP1CA,NFKB1,PSMD4
GO:BP	regulation of cell cycle phase transition	GO:1901987	3.14253e-05	4.50272	543	107	17	18123	PSMB1,PSMB3,PSMB2,PSMA1,PSMA2,CNOT9,ANAPC10,PSMA6,PSMA4,PSMA7,PSMD9,PSMA3,NEDD1,CNOT11,PSMD4,CNOT7,ARID3A
GO:BP	cellular response to oxygen levels	GO:0071453	3.45326e-05	4.46177	243	107	12	18123	PSMB1,PSMB3,PSMB2,PSMA1,PSMA2,PSMA6,PSMA4,PSMA7,PSMD9,PSMA3,ELOC,PSMD4
GO:BP	regulation of cellular ketone metabolic process	GO:0010565	3.73795e-05	4.42737	196	107	11	18123	PSMB1,PSMB3,PSMB2,PSMA1,PSMA2,PSMA6,PSMA4,PSMA7,PSMD9,PSMA3,PSMD4
GO:BP	protein-DNA complex assembly	GO:0065004	4.05922e-05	4.39156	300	107	13	18123	PSMB1,PSMB3,PSMB2,PSMA1,PSMA2,PSMA6,PSMA4,PSMA7,PSMD9,PSMA3,CENPC,PIH1D1,PSMD4
GO:BP	negative regulation of cell cycle	GO:0045786	4.41302e-05	4.35526	487	107	16	18123	PSMB1,PSMB3,PSMB2,PSMA1,PSMA2,CNOT9,PSMA6,PSMA4,PSMA7,PSMD9,PSMA3,CNOT11,PSMD4,NAA10,CNOT7,ARID3A
GO:BP	post-translational protein modification	GO:0043687	4.73597e-05	4.32459	362	107	14	18123	PSMB1,PSMB3,PSMB2,PSMA1,PSMA2,PSMA6,COPS6,PSMA4,PSMA7,PSMD9,PSMA3,COMMD1,ELOC,PSMD4
GO:BP	positive regulation of defense response	GO:0031349	5.07353e-05	4.29469	364	107	14	18123	PSMB1,PSMB3,PSMB2,PSMA1,PSMA2,PSMA6,IRF3,PSMA4,PSMA7,PSMD9,PSMA3,NFKB1,PSMD4,LSM14A
GO:BP	cellular response to tumor necrosis factor	GO:0071356	5.53526e-05	4.25686	308	107	13	18123	PSMB1,PSMB3,PSMB2,PSMA1,PSMA2,PSMA6,PSMA4,PSMA7,COMMD7,PSMD9,PSMA3,NFKB1,PSMD4
GO:BP	protein modification by small protein removal	GO:0070646	5.97287e-05	4.22382	310	107	13	18123	PSMB1,PSMB3,PSMB2,PSMA1,PSMA2,PSMA6,COPS6,PSMA4,PSMA7,PSMD9,PSMA3,WDR48,PSMD4
GO:BP	proteasomal protein catabolic process	GO:0010498	6.53794e-05	4.18456	501	107	16	18123	PSMB1,PSMB3,PSMB2,PSMA1,PSMA2,ANAPC10,PSMA6,PSMA4,PSMA7,PSMD9,PSMA3,RPL11,UBE2V2,XPO1,COMMD1,PSMD4
GO:BP	cellular protein-containing complex assembly	GO:0034622	7.39194e-05	4.13124	1150	107	24	18123	PSMB1,PSMB3,PSMB2,PSMA1,NUMA1,PSMA2,SCAF11,PSMA6,PSMA4,PSMA7,PSMD9,PSMA3,RPL11,PFDN6,CENPC,VMA21,PIH1D1,VBP1,NDUFAF3,PSMD4,EIF3G,CHMP4B,ARPC5L,LSM4
GO:BP	stem cell differentiation	GO:0048863	7.60169e-05	4.11909	261	107	12	18123	PSMB1,PSMB3,PSMB2,PSMA1,PSMA2,PSMA6,PSMA4,PSMA7,PSMD9,PSMA3,PSMD4,CBFB
GO:BP	G2/M transition of mitotic cell cycle	GO:0000086	7.92781e-05	4.10085	262	107	12	18123	PSMB1,PSMB3,PSMB2,PSMA1,PSMA2,PSMA6,PSMA4,PSMA7,PSMD9,PSMA3,NEDD1,PSMD4
GO:BP	antigen receptor-mediated signaling pathway	GO:0050851	8.98762e-05	4.04636	321	107	13	18123	PSMB1,PSMB3,PSMB2,PSMA1,PSMA2,PSMA6,PSMA4,PSMA7,PSMD9,PSMA3,NFKB1,PSMD4,CBFB
GO:BP	nucleobase-containing compound metabolic process	GO:0006139	9.38774e-05	4.02744	5752	107	61	18123	PSMB1,PSMB3,PSMB2,GUK1,PSMA1,COMMD6,SMARCC2,ZBTB8OS,PSMA2,HNRNPK,CNOT9,SCAF11,LSM7,NCBP3,FUBP3,MED11,PSMA6,NUDT16,IRF3,COPS6,PSMA4,PSMA7,COMMD7,NOP10,NSMCE1,PSMD9,LSM5,PSMA3,SEC13,RPL11,WDR48,UBE2V2,ELP6,CNOT11,INTS12,AIMP1,MED30,PIH1D1,UPF2,TRA2A,NFKB1,SNX6,XPO1,RPL37A,ZC3H13,COMMD1,ELOC,ZNF143,GTF2A1,LSM6,SRSF7,PSMD4,PCF11,TSEN34,MED17,CBFB,CNOT7,LSM4,ARID3A,MED22,TNPO1
GO:BP	DNA-dependent DNA replication	GO:0006261	0.000101408	3.99393	216	107	11	18123	PSMB1,PSMB3,PSMB2,PSMA1,PSMA2,PSMA6,PSMA4,PSMA7,PSMD9,PSMA3,PSMD4
GO:BP	negative regulation of Wnt signaling pathway	GO:0030178	0.00012227	3.91268	220	107	11	18123	PSMB1,PSMB3,PSMB2,PSMA1,PSMA2,PSMA6,PSMA4,PSMA7,PSMD9,PSMA3,PSMD4
GO:BP	cell cycle G2/M phase transition	GO:0044839	0.000124373	3.90527	273	107	12	18123	PSMB1,PSMB3,PSMB2,PSMA1,PSMA2,PSMA6,PSMA4,PSMA7,PSMD9,PSMA3,NEDD1,PSMD4
GO:BP	response to tumor necrosis factor	GO:0034612	0.000133109	3.87579	332	107	13	18123	PSMB1,PSMB3,PSMB2,PSMA1,PSMA2,PSMA6,PSMA4,PSMA7,COMMD7,PSMD9,PSMA3,NFKB1,PSMD4
GO:BP	protein modification by small protein conjugation or removal	GO:0070647	0.000147375	3.83158	1193	107	24	18123	PSMB1,PSMB3,PSMB2,PSMA1,PSMA2,MED11,ANAPC10,PSMA6,COPS6,PSMA4,PSMA7,NSMCE1,PSMD9,PSMA3,RPL11,WDR48,UBE2V2,MED30,KCMF1,MKRN2,COMMD1,ELOC,PSMD4,CBFB
GO:BP	cell cycle phase transition	GO:0044770	0.000151035	3.82092	681	107	18	18123	PSMB1,PSMB3,PSMB2,PSMA1,PSMA2,CNOT9,ANAPC10,PSMA6,PSMA4,PSMA7,PSMD9,PSMA3,NEDD1,CNOT11,PSMD4,CHMP4B,CNOT7,ARID3A
GO:BP	cell cycle process	GO:0022402	0.000157277	3.80333	1388	107	26	18123	PSMB1,PSMB3,PSMB2,PSMA1,NUMA1,PSMA2,CNOT9,ANAPC10,PSMA6,NUDT16,PSMA4,PSMA7,PSMD9,PSMA3,SEC13,NEDD1,CNOT11,CENPC,XPO1,TUBB8,PSMD4,NAA10,LSM14A,CHMP4B,CNOT7,ARID3A
GO:BP	regulation of mitotic cell cycle	GO:0007346	0.000177469	3.75088	612	107	17	18123	PSMB1,PSMB3,PSMB2,PSMA1,PSMA2,CNOT9,ANAPC10,PSMA6,PSMA4,PSMA7,PSMD9,PSMA3,NEDD1,CNOT11,PSMD4,CNOT7,ARID3A
GO:BP	protein deubiquitination	GO:0016579	0.000258305	3.58787	292	107	12	18123	PSMB1,PSMB3,PSMB2,PSMA1,PSMA2,PSMA6,PSMA4,PSMA7,PSMD9,PSMA3,WDR48,PSMD4
GO:BP	heterocycle metabolic process	GO:0046483	0.000317095	3.49881	5929	107	61	18123	PSMB1,PSMB3,PSMB2,GUK1,PSMA1,COMMD6,SMARCC2,ZBTB8OS,PSMA2,HNRNPK,CNOT9,SCAF11,LSM7,NCBP3,FUBP3,MED11,PSMA6,NUDT16,IRF3,COPS6,PSMA4,PSMA7,COMMD7,NOP10,NSMCE1,PSMD9,LSM5,PSMA3,SEC13,RPL11,WDR48,UBE2V2,ELP6,CNOT11,INTS12,AIMP1,MED30,PIH1D1,UPF2,TRA2A,NFKB1,SNX6,XPO1,RPL37A,ZC3H13,COMMD1,ELOC,ZNF143,GTF2A1,LSM6,SRSF7,PSMD4,PCF11,TSEN34,MED17,CBFB,CNOT7,LSM4,ARID3A,MED22,TNPO1
GO:BP	translation	GO:0006412	0.000362172	3.44109	804	107	19	18123	CNOT9,LSM7,LSM5,MRPS24,MRPS10,RPL11,MRPL34,CNOT11,AIMP1,PPP1CA,RPL37A,ELOC,LSM6,EIF3G,LSM14A,MRPL55,CNOT7,LSM4,MRPS18B
GO:BP	regulation of small molecule metabolic process	GO:0062012	0.000394759	3.40367	430	107	14	18123	PSMB1,PSMB3,PSMB2,PSMA1,PSMA2,PSMA6,PSMA4,PSMA7,PSMD9,PSMA3,SEC13,PPP1CA,NFKB1,PSMD4
GO:BP	cellular aromatic compound metabolic process	GO:0006725	0.000424881	3.37173	5973	107	61	18123	PSMB1,PSMB3,PSMB2,GUK1,PSMA1,COMMD6,SMARCC2,ZBTB8OS,PSMA2,HNRNPK,CNOT9,SCAF11,LSM7,NCBP3,FUBP3,MED11,PSMA6,NUDT16,IRF3,COPS6,PSMA4,PSMA7,COMMD7,NOP10,NSMCE1,PSMD9,LSM5,PSMA3,SEC13,RPL11,WDR48,UBE2V2,ELP6,CNOT11,INTS12,AIMP1,MED30,PIH1D1,UPF2,TRA2A,NFKB1,SNX6,XPO1,RPL37A,ZC3H13,COMMD1,ELOC,ZNF143,GTF2A1,LSM6,SRSF7,PSMD4,PCF11,TSEN34,MED17,CBFB,CNOT7,LSM4,ARID3A,MED22,TNPO1
GO:BP	ubiquitin-dependent protein catabolic process	GO:0006511	0.000550948	3.25889	663	107	17	18123	PSMB1,PSMB3,PSMB2,PSMA1,PSMA2,ANAPC10,PSMA6,PSMA4,PSMA7,PSMD9,PSMA3,RPL11,UBE2V2,XPO1,COMMD1,ELOC,PSMD4
GO:BP	peptide biosynthetic process	GO:0043043	0.000634423	3.19762	834	107	19	18123	CNOT9,LSM7,LSM5,MRPS24,MRPS10,RPL11,MRPL34,CNOT11,AIMP1,PPP1CA,RPL37A,ELOC,LSM6,EIF3G,LSM14A,MRPL55,CNOT7,LSM4,MRPS18B
GO:BP	modification-dependent protein catabolic process	GO:0019941	0.000638212	3.19504	670	107	17	18123	PSMB1,PSMB3,PSMB2,PSMA1,PSMA2,ANAPC10,PSMA6,PSMA4,PSMA7,PSMD9,PSMA3,RPL11,UBE2V2,XPO1,COMMD1,ELOC,PSMD4
GO:BP	viral process	GO:0016032	0.00065064	3.18666	1011	107	21	18123	PSMB1,PSMB3,PSMB2,HNRNPK,IRF3,COPS6,PSMA4,PSMA7,PSMA3,SEC13,RPL11,WDR48,PPP1CA,ITSN2,XPO1,RPL37A,ELOC,EIF3G,CHMP4B,CNOT7,TNPO1
GO:BP	cellular response to stress	GO:0033554	0.000682033	3.16619	2142	107	32	18123	PSMB1,PSMB3,PSMB2,PSMA1,PSMA2,GOSR2,HNRNPK,CNOT9,CLEC16A,ARHGEF6,PSMA6,IRF3,COPS6,PSMA4,PSMA7,NSMCE1,PSMD9,PSMA3,SEC13,WDR48,UBE2V2,CNOT11,ABI3,PPP1CA,NFKB1,HSPA6,COMMD1,ELOC,PSMD4,SRXN1,CNOT7,ARID3A
GO:BP	nuclear-transcribed mRNA catabolic process, deadenylation-dependent decay	GO:0000288	0.000698858	3.15561	79	107	7	18123	CNOT9,LSM7,LSM5,CNOT11,LSM6,CNOT7,LSM4
GO:BP	proteolysis involved in cellular protein catabolic process	GO:0051603	0.00076385	3.11699	760	107	18	18123	PSMB1,PSMB3,PSMB2,PSMA1,PSMA2,ANAPC10,PSMA6,PSMA4,PSMA7,PSMD9,PSMA3,RPL11,UBE2V2,XPO1,COMMD1,ELOC,PSMD4,CHMP4B
GO:BP	modification-dependent macromolecule catabolic process	GO:0043632	0.000801011	3.09636	681	107	17	18123	PSMB1,PSMB3,PSMB2,PSMA1,PSMA2,ANAPC10,PSMA6,PSMA4,PSMA7,PSMD9,PSMA3,RPL11,UBE2V2,XPO1,COMMD1,ELOC,PSMD4
GO:BP	cellular component biogenesis	GO:0044085	0.000832058	3.07985	3377	107	42	18123	PSMB1,PSMB3,PSMB2,PSMA1,NUMA1,SRGAP2,PSMA2,GOSR2,SCAF11,ARHGEF6,PSMA6,NUDT16,PSMA4,MIEN1,PSMA7,NOP10,PSMD9,PSMA3,SEC13,RPL11,UBE2V2,NEDD1,PFDN6,ABI3,CENPC,VMA21,PIH1D1,VBP1,XPO1,RPL37A,TUBB8,NDUFAF3,LSM6,PSMD4,EIF3G,LSM14A,CBFB,CHMP4B,ARPC5L,CNOT7,LSM4,TNPO1
GO:BP	regulation of cell cycle	GO:0051726	0.000847994	3.07161	1120	107	22	18123	PSMB1,PSMB3,PSMB2,PSMA1,NUMA1,PSMA2,CNOT9,ANAPC10,PSMA6,NUDT16,PSMA4,PSMA7,PSMD9,PSMA3,NEDD1,CNOT11,XPO1,PSMD4,NAA10,CHMP4B,CNOT7,ARID3A
GO:BP	Wnt signaling pathway	GO:0016055	0.000912222	3.0399	533	107	15	18123	PSMB1,PSMB3,PSMB2,PSMA1,PSMA2,PPM1B,PSMA6,PSMA4,PSMA7,PSMD9,PSMA3,PPP1CA,NFKB1,PSMD4,CBFB
GO:BP	nuclear-transcribed mRNA catabolic process	GO:0000956	0.000922838	3.03487	214	107	10	18123	CNOT9,LSM7,LSM5,RPL11,CNOT11,UPF2,RPL37A,LSM6,CNOT7,LSM4
GO:BP	cell-cell signaling by wnt	GO:0198738	0.000956342	3.01939	535	107	15	18123	PSMB1,PSMB3,PSMB2,PSMA1,PSMA2,PPM1B,PSMA6,PSMA4,PSMA7,PSMD9,PSMA3,PPP1CA,NFKB1,PSMD4,CBFB
GO:BP	cellular nitrogen compound biosynthetic process	GO:0044271	0.00101258	2.99457	5054	107	54	18123	PSMB1,PSMB3,PSMB2,GUK1,PSMA1,COMMD6,SMARCC2,PSMA2,HNRNPK,CNOT9,LSM7,FUBP3,MED11,PSMA6,NUDT16,IRF3,PSMA4,PSMA7,COMMD7,NOP10,PSMD9,LSM5,MRPS24,PSMA3,MRPS10,RPL11,MRPL34,CNOT11,INTS12,AIMP1,PPP1CA,MED30,PIH1D1,NFKB1,SNX6,XPO1,RPL37A,COMMD1,ELOC,ZNF143,GTF2A1,LSM6,PSMD4,EIF3G,PCF11,LSM14A,MED17,CBFB,MRPL55,CNOT7,LSM4,ARID3A,MED22,MRPS18B
GO:BP	cellular ketone metabolic process	GO:0042180	0.00110503	2.95662	274	107	11	18123	PSMB1,PSMB3,PSMB2,PSMA1,PSMA2,PSMA6,PSMA4,PSMA7,PSMD9,PSMA3,PSMD4
GO:BP	cellular macromolecule biosynthetic process	GO:0034645	0.00121659	2.91486	5081	107	54	18123	PSMB1,PSMB3,PSMB2,PSMA1,COMMD6,SMARCC2,PSMA2,PPM1B,HNRNPK,CNOT9,LSM7,FUBP3,MED11,PSMA6,IRF3,PSMA4,PSMA7,COMMD7,KRTCAP2,NOP10,PSMD9,LSM5,MRPS24,PSMA3,MRPS10,RPL11,MRPL34,CNOT11,INTS12,AIMP1,PPP1CA,MED30,PIH1D1,NFKB1,SNX6,XPO1,RPL37A,COMMD1,ELOC,ZNF143,GTF2A1,LSM6,PSMD4,EIF3G,PCF11,LSM14A,MED17,CBFB,MRPL55,CNOT7,LSM4,ARID3A,MED22,MRPS18B
GO:BP	cellular amino acid metabolic process	GO:0006520	0.00148322	2.8288	344	107	12	18123	PSMB1,PSMB3,PSMB2,PSMA1,PSMA2,PSMA6,PSMA4,PSMA7,PSMD9,PSMA3,AIMP1,PSMD4
GO:BP	macromolecule biosynthetic process	GO:0009059	0.00186679	2.7289	5145	107	54	18123	PSMB1,PSMB3,PSMB2,PSMA1,COMMD6,SMARCC2,PSMA2,PPM1B,HNRNPK,CNOT9,LSM7,FUBP3,MED11,PSMA6,IRF3,PSMA4,PSMA7,COMMD7,KRTCAP2,NOP10,PSMD9,LSM5,MRPS24,PSMA3,MRPS10,RPL11,MRPL34,CNOT11,INTS12,AIMP1,PPP1CA,MED30,PIH1D1,NFKB1,SNX6,XPO1,RPL37A,COMMD1,ELOC,ZNF143,GTF2A1,LSM6,PSMD4,EIF3G,PCF11,LSM14A,MED17,CBFB,MRPL55,CNOT7,LSM4,ARID3A,MED22,MRPS18B
GO:BP	organic cyclic compound metabolic process	GO:1901360	0.00213572	2.67045	6227	107	61	18123	PSMB1,PSMB3,PSMB2,GUK1,PSMA1,COMMD6,SMARCC2,ZBTB8OS,PSMA2,HNRNPK,CNOT9,SCAF11,LSM7,NCBP3,FUBP3,MED11,PSMA6,NUDT16,IRF3,COPS6,PSMA4,PSMA7,COMMD7,NOP10,NSMCE1,PSMD9,LSM5,PSMA3,SEC13,RPL11,WDR48,UBE2V2,ELP6,CNOT11,INTS12,AIMP1,MED30,PIH1D1,UPF2,TRA2A,NFKB1,SNX6,XPO1,RPL37A,ZC3H13,COMMD1,ELOC,ZNF143,GTF2A1,LSM6,SRSF7,PSMD4,PCF11,TSEN34,MED17,CBFB,CNOT7,LSM4,ARID3A,MED22,TNPO1
GO:BP	negative regulation of metabolic process	GO:0009892	0.00220183	2.65722	3498	107	42	18123	PSMB1,PSMB3,PSMB2,PSMA1,SMARCC2,PSMA2,PPM1B,HNRNPK,CNOT9,CLEC16A,PFDN1,LSM7,PSMA6,NUDT16,IRF3,PSMA4,PSMA7,COMMD7,PSMD9,LSM5,PSMA3,SEC13,RPL11,NUTF2,PFDN6,CNOT11,PIH1D1,UPF2,NFKB1,VBP1,SNX6,XPO1,RPL37A,LSM6,SRSF7,PSMD4,LSM14A,CBFB,CHMP4B,CNOT7,LSM4,TNPO1
GO:BP	exonucleolytic catabolism of deadenylated mRNA	GO:0043928	0.00226431	2.64506	33	107	5	18123	LSM7,LSM5,LSM6,CNOT7,LSM4
GO:BP	cellular catabolic process	GO:0044248	0.00234114	2.63057	2381	107	33	18123	PSMB1,PSMB3,PSMB2,PSMA1,VTI1A,PSMA2,CNOT9,CLEC16A,LSM7,ANAPC10,PSMA6,NUDT16,PSMA4,PSMA7,PSMD9,LSM5,PSMA3,RPL11,UBE2V2,CNOT11,PPP1CA,UPF2,SNX6,XPO1,RPL37A,COMMD1,ELOC,LSM6,PSMD4,CHMP4B,CNOT7,LSM4,TNPO1
GO:BP	cellular protein catabolic process	GO:0044257	0.00236288	2.62656	822	107	18	18123	PSMB1,PSMB3,PSMB2,PSMA1,PSMA2,ANAPC10,PSMA6,PSMA4,PSMA7,PSMD9,PSMA3,RPL11,UBE2V2,XPO1,COMMD1,ELOC,PSMD4,CHMP4B
GO:BP	cytokine-mediated signaling pathway	GO:0019221	0.00244603	2.61154	824	107	18	18123	PSMB1,PSMB3,PSMB2,PSMA1,PSMA2,CNOT9,PSMA6,IRF3,PSMA4,PSMA7,COMMD7,PSMD9,PSMA3,NFKB1,PSMD4,LSM14A,CBFB,CNOT7
GO:BP	negative regulation of macromolecule metabolic process	GO:0010605	0.00266929	2.5736	3262	107	40	18123	PSMB1,PSMB3,PSMB2,PSMA1,SMARCC2,PSMA2,PPM1B,HNRNPK,CNOT9,PFDN1,LSM7,PSMA6,NUDT16,IRF3,PSMA4,PSMA7,COMMD7,PSMD9,LSM5,PSMA3,SEC13,RPL11,NUTF2,PFDN6,CNOT11,PIH1D1,UPF2,NFKB1,VBP1,SNX6,XPO1,RPL37A,LSM6,SRSF7,PSMD4,LSM14A,CBFB,CNOT7,LSM4,TNPO1
GO:BP	RNA processing	GO:0006396	0.00270361	2.56806	1010	107	20	18123	ZBTB8OS,HNRNPK,SCAF11,LSM7,NCBP3,NUDT16,NOP10,LSM5,RPL11,ELP6,INTS12,PIH1D1,TRA2A,RPL37A,ZC3H13,LSM6,SRSF7,PCF11,TSEN34,LSM4
GO:BP	response to hypoxia	GO:0001666	0.00291773	2.53495	367	107	12	18123	PSMB1,PSMB3,PSMB2,PSMA1,PSMA2,PSMA6,PSMA4,PSMA7,PSMD9,PSMA3,ELOC,PSMD4
GO:BP	nuclear-transcribed mRNA catabolic process, exonucleolytic	GO:0000291	0.00306824	2.51311	35	107	5	18123	LSM7,LSM5,LSM6,CNOT7,LSM4
GO:BP	positive regulation of response to external stimulus	GO:0032103	0.00361753	2.44159	518	107	14	18123	PSMB1,PSMB3,PSMB2,PSMA1,PSMA2,PSMA6,IRF3,PSMA4,PSMA7,PSMD9,PSMA3,NFKB1,PSMD4,LSM14A
GO:BP	positive regulation of mRNA metabolic process	GO:1903313	0.00365956	2.43657	144	107	8	18123	CNOT9,LSM7,LSM5,CNOT11,TRA2A,LSM6,CNOT7,LSM4
GO:BP	cell cycle	GO:0007049	0.00425433	2.37117	1867	107	28	18123	PSMB1,PSMB3,PSMB2,PSMA1,NUMA1,PSMA2,CNOT9,ANAPC10,PSMA6,NUDT16,PSMA4,PSMA7,PSMD9,PSMA3,SEC13,NEDD1,CNOT11,TUBA1C,CENPC,PPP1CA,XPO1,TUBB8,PSMD4,NAA10,LSM14A,CHMP4B,CNOT7,ARID3A
GO:BP	response to decreased oxygen levels	GO:0036293	0.00441691	2.35488	382	107	12	18123	PSMB1,PSMB3,PSMB2,PSMA1,PSMA2,PSMA6,PSMA4,PSMA7,PSMD9,PSMA3,ELOC,PSMD4
GO:BP	mRNA destabilization	GO:0061157	0.00549163	2.2603	107	107	7	18123	CNOT9,LSM7,LSM5,CNOT11,LSM6,CNOT7,LSM4
GO:BP	amide biosynthetic process	GO:0043604	0.00647375	2.18884	975	107	19	18123	CNOT9,LSM7,LSM5,MRPS24,MRPS10,RPL11,MRPL34,CNOT11,AIMP1,PPP1CA,RPL37A,ELOC,LSM6,EIF3G,LSM14A,MRPL55,CNOT7,LSM4,MRPS18B
GO:BP	positive regulation of mRNA catabolic process	GO:0061014	0.00660538	2.1801	110	107	7	18123	CNOT9,LSM7,LSM5,CNOT11,LSM6,CNOT7,LSM4
GO:BP	RNA destabilization	GO:0050779	0.00701604	2.15391	111	107	7	18123	CNOT9,LSM7,LSM5,CNOT11,LSM6,CNOT7,LSM4
GO:BP	immune response-activating signal transduction	GO:0002757	0.00750009	2.12493	475	107	13	18123	PSMB1,PSMB3,PSMB2,PSMA1,PSMA2,PSMA6,PSMA4,PSMA7,PSMD9,PSMA3,NFKB1,PSMD4,CBFB
GO:BP	immune response-activating cell surface receptor signaling pathway	GO:0002429	0.00750009	2.12493	475	107	13	18123	PSMB1,PSMB3,PSMB2,PSMA1,PSMA2,PSMA6,PSMA4,PSMA7,PSMD9,PSMA3,NFKB1,PSMD4,CBFB
GO:BP	DNA replication	GO:0006260	0.00845723	2.07277	338	107	11	18123	PSMB1,PSMB3,PSMB2,PSMA1,PSMA2,PSMA6,PSMA4,PSMA7,PSMD9,PSMA3,PSMD4
GO:BP	cell surface receptor signaling pathway involved in cell-cell signaling	GO:1905114	0.00856263	2.06739	639	107	15	18123	PSMB1,PSMB3,PSMB2,PSMA1,PSMA2,PPM1B,PSMA6,PSMA4,PSMA7,PSMD9,PSMA3,PPP1CA,NFKB1,PSMD4,CBFB
GO:BP	organic substance catabolic process	GO:1901575	0.00896762	2.04732	2289	107	31	18123	PSMB1,PSMB3,PSMB2,PSMA1,PSMA2,CNOT9,LSM7,ANAPC10,PSMA6,NUDT16,PSMA4,PSMA7,PSMD9,LSM5,PSMA3,SEC13,RPL11,UBE2V2,CNOT11,PPP1CA,UPF2,XPO1,RPL37A,COMMD1,ELOC,LSM6,PSMD4,CHMP4B,CNOT7,LSM4,TNPO1
GO:BP	peptide metabolic process	GO:0006518	0.00906489	2.04264	998	107	19	18123	CNOT9,LSM7,LSM5,MRPS24,MRPS10,RPL11,MRPL34,CNOT11,AIMP1,PPP1CA,RPL37A,ELOC,LSM6,EIF3G,LSM14A,MRPL55,CNOT7,LSM4,MRPS18B
GO:BP	response to oxygen levels	GO:0070482	0.00911097	2.04044	410	107	12	18123	PSMB1,PSMB3,PSMB2,PSMA1,PSMA2,PSMA6,PSMA4,PSMA7,PSMD9,PSMA3,ELOC,PSMD4
GO:BP	protein-containing complex assembly	GO:0065003	0.00972178	2.01225	1724	107	26	18123	PSMB1,PSMB3,PSMB2,PSMA1,NUMA1,PSMA2,GOSR2,SCAF11,PSMA6,PSMA4,PSMA7,PSMD9,PSMA3,SEC13,RPL11,PFDN6,CENPC,VMA21,PIH1D1,VBP1,NDUFAF3,PSMD4,EIF3G,CHMP4B,ARPC5L,LSM4
GO:BP	cellular component assembly	GO:0022607	0.0159136	1.79823	3104	107	37	18123	PSMB1,PSMB3,PSMB2,PSMA1,NUMA1,SRGAP2,PSMA2,GOSR2,SCAF11,ARHGEF6,PSMA6,PSMA4,MIEN1,PSMA7,PSMD9,PSMA3,SEC13,RPL11,UBE2V2,NEDD1,PFDN6,ABI3,CENPC,VMA21,PIH1D1,VBP1,TUBB8,NDUFAF3,PSMD4,EIF3G,LSM14A,CBFB,CHMP4B,ARPC5L,CNOT7,LSM4,TNPO1
GO:BP	immune response-regulating cell surface receptor signaling pathway	GO:0002768	0.0161147	1.79278	510	107	13	18123	PSMB1,PSMB3,PSMB2,PSMA1,PSMA2,PSMA6,PSMA4,PSMA7,PSMD9,PSMA3,NFKB1,PSMD4,CBFB
GO:BP	immune response-regulating signaling pathway	GO:0002764	0.0171541	1.76563	513	107	13	18123	PSMB1,PSMB3,PSMB2,PSMA1,PSMA2,PSMA6,PSMA4,PSMA7,PSMD9,PSMA3,NFKB1,PSMD4,CBFB
GO:BP	macromolecule metabolic process	GO:0043170	0.0184107	1.73493	9867	107	80	18123	PSMB1,PSMB3,PSMB2,PSMA1,COMMD6,SMARCC2,ZBTB8OS,PSMA2,PPM1B,HNRNPK,CNOT9,SCAF11,PFDN1,LSM7,NCBP3,FUBP3,MED11,ANAPC10,PSMA6,NUDT16,IRF3,COPS6,PSMA4,NAA20,PSMA7,COMMD7,KRTCAP2,NOP10,NSMCE1,PSMD9,LSM5,MRPS24,PSMA3,MRPS10,SEC13,RPL11,WDR48,UBE2V2,NUTF2,MRPL34,PFDN6,ELP6,CNOT11,INTS12,AIMP1,PPP1CA,MED30,KCMF1,PIH1D1,UPF2,TRA2A,MKRN2,NFKB1,VBP1,SNX6,XPO1,RPL37A,ZC3H13,COMMD1,ELOC,ZNF143,GTF2A1,LSM6,SRSF…
GO:BP	catabolic process	GO:0009056	0.0249451	1.60302	2779	107	34	18123	PSMB1,PSMB3,PSMB2,PSMA1,VTI1A,PSMA2,CNOT9,CLEC16A,LSM7,ANAPC10,PSMA6,NUDT16,PSMA4,PSMA7,PSMD9,LSM5,PSMA3,SEC13,RPL11,UBE2V2,CNOT11,PPP1CA,UPF2,SNX6,XPO1,RPL37A,COMMD1,ELOC,LSM6,PSMD4,CHMP4B,CNOT7,LSM4,TNPO1
GO:BP	regulation of nucleobase-containing compound metabolic process	GO:0019219	0.0269715	1.56909	4123	107	44	18123	PSMB1,PSMB3,PSMB2,PSMA1,COMMD6,SMARCC2,PSMA2,HNRNPK,CNOT9,LSM7,FUBP3,MED11,PSMA6,NUDT16,IRF3,PSMA4,PSMA7,COMMD7,PSMD9,LSM5,PSMA3,SEC13,WDR48,UBE2V2,CNOT11,MED30,PIH1D1,TRA2A,NFKB1,SNX6,XPO1,COMMD1,ELOC,ZNF143,LSM6,SRSF7,PSMD4,MED17,CBFB,CNOT7,LSM4,ARID3A,MED22,TNPO1
GO:BP	protein catabolic process	GO:0030163	0.0280629	1.55187	983	107	18	18123	PSMB1,PSMB3,PSMB2,PSMA1,PSMA2,ANAPC10,PSMA6,PSMA4,PSMA7,PSMD9,PSMA3,RPL11,UBE2V2,XPO1,COMMD1,ELOC,PSMD4,CHMP4B
GO:BP	RNA splicing	GO:0008380	0.0282792	1.54853	459	107	12	18123	ZBTB8OS,HNRNPK,SCAF11,LSM7,LSM5,TRA2A,ZC3H13,LSM6,SRSF7,PCF11,TSEN34,LSM4
GO:BP	nitrogen compound metabolic process	GO:0006807	0.0292777	1.53346	10148	107	81	18123	PSMB1,PSMB3,PSMB2,GUK1,PSMA1,COMMD6,SMARCC2,ZBTB8OS,PSMA2,PPM1B,HNRNPK,CNOT9,SCAF11,PFDN1,LSM7,NCBP3,FUBP3,MED11,ANAPC10,PSMA6,NUDT16,IRF3,COPS6,PSMA4,NAA20,PSMA7,COMMD7,KRTCAP2,NOP10,NSMCE1,PSMD9,LSM5,MRPS24,PSMA3,MRPS10,SEC13,RPL11,WDR48,UBE2V2,MRPL34,PFDN6,ELP6,CNOT11,INTS12,AIMP1,CEPT1,PPP1CA,MED30,KCMF1,PIH1D1,UPF2,TRA2A,MKRN2,NFKB1,VBP1,SNX6,XPO1,RPL37A,ZC3H13,COMMD1,ELOC,ZNF143,GTF2A1,LSM6…
GO:BP	cellular component organization or biogenesis	GO:0071840	0.0348136	1.45825	6880	107	62	18123	PSMB1,PSMB3,PSMB2,EMC7,PSMA1,NUMA1,SRGAP2,VTI1A,SMARCC2,SEC61G,PSMA2,GOSR2,HNRNPK,SCAF11,CLEC16A,PFDN1,ANAPC10,ARHGEF6,PSMA6,NUDT16,COPS6,PSMA4,MIEN1,PSMA7,NOP10,PSMD9,MRPS24,PSMA3,MRPS10,SEC13,RPL11,UBE2V2,MRPL34,WASHC4,NEDD1,PFDN6,HPS3,TUBA1C,ABI3,CENPC,PPP1CA,VMA21,PIH1D1,VBP1,ITSN2,XPO1,RPL37A,TUBB8,NDUFAF3,LSM6,PSMD4,EIF3G,NAA10,LSM14A,CBFB,CHMP4B,ARPC5L,MRPL55,CNOT7,LSM4,MRPS18B,TNPO1
GO:BP	activation of immune response	GO:0002253	0.0482242	1.31674	566	107	13	18123	PSMB1,PSMB3,PSMB2,PSMA1,PSMA2,PSMA6,PSMA4,PSMA7,PSMD9,PSMA3,NFKB1,PSMD4,CBFB
GO:CC	protein-containing complex	GO:0032991	2.74385e-16	15.5616	5541	110	77	18964	PSMB1,PSMB3,PSMB2,EMC7,PSMA1,NUMA1,VTI1A,SMARCC2,ZBTB8OS,SEC61G,PSMA2,GOSR2,HNRNPK,CNOT9,PFDN1,LSM7,NCBP3,MED11,ANAPC10,PSMA6,COPS6,PSMA4,NAA20,PSMA7,KRTCAP2,NOP10,NSMCE1,PSMD9,LSM5,MRPS24,PSMA3,MRPS10,SEC13,RPL11,UBE2V2,NUTF2,MRPL34,WASHC4,PFDN6,HPS3,ELP6,CNOT11,INTS12,BORCS7,ABI3,AIMP1,PPP1CA,MED30,PIH1D1,UPF2,TRA2A,NFKB1,HSPA6,VBP1,SNX6,XPO1,RPL37A,ZC3H13,COMMD1,ELOC,GTF2A1,LSM6,PSMD4,EIF3G,NA…
GO:CC	proteasome core complex	GO:0005839	1.18191e-12	11.9274	23	110	9	18964	PSMB1,PSMB3,PSMB2,PSMA1,PSMA2,PSMA6,PSMA4,PSMA7,PSMA3
GO:CC	proteasome complex	GO:0000502	4.27104e-11	10.3695	67	110	11	18964	PSMB1,PSMB3,PSMB2,PSMA1,PSMA2,PSMA6,PSMA4,PSMA7,PSMD9,PSMA3,PSMD4
GO:CC	intracellular protein-containing complex	GO:0140535	5.63088e-11	10.2494	768	110	26	18964	PSMB1,PSMB3,PSMB2,PSMA1,ZBTB8OS,PSMA2,CNOT9,MED11,ANAPC10,PSMA6,PSMA4,NAA20,PSMA7,PSMD9,PSMA3,UBE2V2,ELP6,CNOT11,MED30,NFKB1,COMMD1,ELOC,GTF2A1,PSMD4,NAA10,CNOT7
GO:CC	endopeptidase complex	GO:1905369	1.1491e-10	9.93964	73	110	11	18964	PSMB1,PSMB3,PSMB2,PSMA1,PSMA2,PSMA6,PSMA4,PSMA7,PSMD9,PSMA3,PSMD4
GO:CC	nuclear lumen	GO:0031981	1.3619e-10	9.86585	4453	110	61	18964	PSMB1,PSMB3,PSMB2,PSMA1,NUMA1,SRGAP2,SMARCC2,ZBTB8OS,PSMA2,PPM1B,HNRNPK,COMMD5,SCAF11,LSM7,NCBP3,ANAPC10,PSMA6,NUDT16,IRF3,COPS6,PSMA4,COMMD10,MIEN1,PSMA7,NOP10,NSMCE1,PSMD9,LSM5,PSMA3,SEC13,RPL11,WDR48,UBE2V2,NUTF2,WASHC4,NEDD1,INTS12,CENPC,PPP1CA,MED30,PIH1D1,TRA2A,NFKB1,XPO1,ZC3H13,COMMD1,ELOC,ZNF143,GTF2A1,LSM6,SRSF7,PSMD4,NAA10,PCF11,TSEN34,MED17,CBFB,CNOT7,LSM4,ARID3A,MRPS18B
GO:CC	nucleoplasm	GO:0005654	2.53483e-10	9.59605	4112	110	58	18964	PSMB1,PSMB3,PSMB2,PSMA1,NUMA1,SRGAP2,SMARCC2,ZBTB8OS,PSMA2,HNRNPK,COMMD5,SCAF11,LSM7,NCBP3,ANAPC10,PSMA6,NUDT16,IRF3,COPS6,PSMA4,COMMD10,MIEN1,PSMA7,NOP10,NSMCE1,PSMD9,LSM5,PSMA3,SEC13,RPL11,WDR48,UBE2V2,NUTF2,WASHC4,NEDD1,INTS12,CENPC,PPP1CA,MED30,TRA2A,NFKB1,XPO1,ZC3H13,COMMD1,ELOC,ZNF143,GTF2A1,LSM6,SRSF7,PSMD4,PCF11,TSEN34,MED17,CBFB,CNOT7,LSM4,ARID3A,MRPS18B
GO:CC	nucleus	GO:0005634	1.06957e-09	8.97079	7607	110	80	18964	PSMB1,PSMB3,PSMB2,PSMA1,COMMD6,NUMA1,SRGAP2,SMARCC2,ZBTB8OS,PSMA2,PPM1B,HNRNPK,CNOT9,COMMD5,SCAF11,LSM7,NCBP3,FUBP3,MED11,ANAPC10,PSMA6,NUDT16,IRF3,COPS6,PSMA4,COMMD10,NAA20,MIEN1,PSMA7,NOP10,NSMCE1,PSMD9,LSM5,PSMA3,SEC13,RPL11,WDR48,UBE2V2,NUTF2,WASHC4,NEDD1,ELP6,CNOT11,INTS12,TUBA1C,CENPC,AIMP1,CEPT1,PPP1CA,MED30,PIH1D1,UPF2,TRA2A,NFKB1,HSPA6,VBP1,SNX6,XPO1,RPL37A,ZC3H13,COMMD1,NDUFAF3,ELOC,ZNF…
GO:CC	organelle lumen	GO:0043233	1.89581e-09	8.72221	5579	110	67	18964	PSMB1,PSMB3,PSMB2,PSMA1,NUMA1,SRGAP2,SMARCC2,ZBTB8OS,PSMA2,PPM1B,HNRNPK,COMMD5,SCAF11,LSM7,NCBP3,ANAPC10,PSMA6,NUDT16,IRF3,COPS6,PSMA4,COMMD10,MIEN1,PSMA7,NOP10,NSMCE1,PSMD9,LSM5,MRPS24,PSMA3,MRPS10,SEC13,RPL11,WDR48,UBE2V2,NUTF2,MRPL34,WASHC4,NEDD1,INTS12,CENPC,PPP1CA,MED30,KCMF1,PIH1D1,TRA2A,NFKB1,HSPA6,XPO1,ZC3H13,COMMD1,ELOC,ZNF143,GTF2A1,LSM6,SRSF7,PSMD4,NAA10,PCF11,TSEN34,MED17,CBFB,MRPL55,…
GO:CC	membrane-enclosed lumen	GO:0031974	1.89581e-09	8.72221	5579	110	67	18964	PSMB1,PSMB3,PSMB2,PSMA1,NUMA1,SRGAP2,SMARCC2,ZBTB8OS,PSMA2,PPM1B,HNRNPK,COMMD5,SCAF11,LSM7,NCBP3,ANAPC10,PSMA6,NUDT16,IRF3,COPS6,PSMA4,COMMD10,MIEN1,PSMA7,NOP10,NSMCE1,PSMD9,LSM5,MRPS24,PSMA3,MRPS10,SEC13,RPL11,WDR48,UBE2V2,NUTF2,MRPL34,WASHC4,NEDD1,INTS12,CENPC,PPP1CA,MED30,KCMF1,PIH1D1,TRA2A,NFKB1,HSPA6,XPO1,ZC3H13,COMMD1,ELOC,ZNF143,GTF2A1,LSM6,SRSF7,PSMD4,NAA10,PCF11,TSEN34,MED17,CBFB,MRPL55,…
GO:CC	intracellular organelle lumen	GO:0070013	1.89581e-09	8.72221	5579	110	67	18964	PSMB1,PSMB3,PSMB2,PSMA1,NUMA1,SRGAP2,SMARCC2,ZBTB8OS,PSMA2,PPM1B,HNRNPK,COMMD5,SCAF11,LSM7,NCBP3,ANAPC10,PSMA6,NUDT16,IRF3,COPS6,PSMA4,COMMD10,MIEN1,PSMA7,NOP10,NSMCE1,PSMD9,LSM5,MRPS24,PSMA3,MRPS10,SEC13,RPL11,WDR48,UBE2V2,NUTF2,MRPL34,WASHC4,NEDD1,INTS12,CENPC,PPP1CA,MED30,KCMF1,PIH1D1,TRA2A,NFKB1,HSPA6,XPO1,ZC3H13,COMMD1,ELOC,ZNF143,GTF2A1,LSM6,SRSF7,PSMD4,NAA10,PCF11,TSEN34,MED17,CBFB,MRPL55,…
GO:CC	proteasome core complex, alpha-subunit complex	GO:0019773	1.98774e-09	8.70164	10	110	6	18964	PSMA1,PSMA2,PSMA6,PSMA4,PSMA7,PSMA3
GO:CC	peptidase complex	GO:1905368	2.86219e-09	8.5433	97	110	11	18964	PSMB1,PSMB3,PSMB2,PSMA1,PSMA2,PSMA6,PSMA4,PSMA7,PSMD9,PSMA3,PSMD4
GO:CC	intracellular anatomical structure	GO:0005622	1.2989e-08	7.88643	14808	110	109	18964	PSMB1,PSMB3,PSMB2,GUK1,EMC7,PSMA1,COMMD6,NUMA1,SRGAP2,VTI1A,SMARCC2,ZBTB8OS,SEC61G,PSMA2,PPM1B,GOSR2,HNRNPK,CNOT9,COMMD5,SCAF11,CLEC16A,PFDN1,LSM7,NCBP3,FUBP3,MED11,ANAPC10,ARHGEF6,ACAP1,PSMA6,NUDT16,IRF3,COPS6,PSMA4,COMMD10,NAA20,MIEN1,PSMA7,COMMD7,KRTCAP2,NOP10,NSMCE1,PSMD9,LSM5,MRPS24,PSMA3,MRPS10,SEC13,RPL11,WDR48,UBE2V2,NUTF2,MRPL34,WASHC4,NEDD1,PFDN6,HPS3,ELP6,CNOT11,INTS12,BORCS7,TUBA1C,AB…
GO:CC	cytosol	GO:0005829	1.3991e-08	7.85415	5361	110	64	18964	PSMB1,PSMB3,PSMB2,GUK1,PSMA1,NUMA1,SRGAP2,VTI1A,SEC61G,PSMA2,PPM1B,GOSR2,CNOT9,COMMD5,CLEC16A,LSM7,ANAPC10,ARHGEF6,PSMA6,IRF3,COPS6,PSMA4,NAA20,MIEN1,PSMA7,PSMD9,LSM5,PSMA3,SEC13,RPL11,WDR48,NUTF2,WASHC4,NEDD1,HPS3,ELP6,CNOT11,BORCS7,CENPC,AIMP1,PPP1CA,KCMF1,UPF2,NFKB1,HSPA6,VBP1,SNX6,XPO1,RPL37A,COMMD1,ELOC,GTF2A1,LSM6,PSMD4,EIF3G,NAA10,SRXN1,LSM14A,RABEPK,CHMP4B,CNOT7,LSM4,ARID3A,TNPO1
GO:CC	ribonucleoprotein complex	GO:1990904	1.91352e-08	7.71817	694	110	22	18964	PSMA1,HNRNPK,LSM7,PSMA6,NOP10,LSM5,MRPS24,MRPS10,RPL11,MRPL34,PIH1D1,UPF2,TRA2A,VBP1,XPO1,RPL37A,LSM6,EIF3G,LSM14A,MRPL55,LSM4,MRPS18B
GO:CC	catalytic complex	GO:1902494	9.27755e-07	6.03257	1377	110	28	18964	PSMB1,PSMB3,PSMB2,PSMA1,PSMA2,HNRNPK,LSM7,MED11,ANAPC10,PSMA6,PSMA4,NAA20,PSMA7,KRTCAP2,NOP10,NSMCE1,PSMD9,PSMA3,UBE2V2,PPP1CA,MED30,ZC3H13,COMMD1,ELOC,GTF2A1,PSMD4,NAA10,TSEN34
GO:CC	intracellular membrane-bounded organelle	GO:0043231	1.41457e-06	5.84938	12046	110	97	18964	PSMB1,PSMB3,PSMB2,EMC7,PSMA1,COMMD6,NUMA1,SRGAP2,VTI1A,SMARCC2,ZBTB8OS,SEC61G,PSMA2,PPM1B,GOSR2,HNRNPK,CNOT9,COMMD5,SCAF11,CLEC16A,LSM7,NCBP3,FUBP3,MED11,ANAPC10,ACAP1,PSMA6,NUDT16,IRF3,COPS6,PSMA4,COMMD10,NAA20,MIEN1,PSMA7,COMMD7,KRTCAP2,NOP10,NSMCE1,PSMD9,LSM5,MRPS24,PSMA3,MRPS10,SEC13,RPL11,WDR48,UBE2V2,NUTF2,MRPL34,WASHC4,NEDD1,ELP6,CNOT11,INTS12,BORCS7,TUBA1C,CENPC,AIMP1,CEPT1,PPP1CA,MED30,V…
GO:CC	intracellular organelle	GO:0043229	2.63711e-06	5.57887	13117	110	101	18964	PSMB1,PSMB3,PSMB2,EMC7,PSMA1,COMMD6,NUMA1,SRGAP2,VTI1A,SMARCC2,ZBTB8OS,SEC61G,PSMA2,PPM1B,GOSR2,HNRNPK,CNOT9,COMMD5,SCAF11,CLEC16A,LSM7,NCBP3,FUBP3,MED11,ANAPC10,ACAP1,PSMA6,NUDT16,IRF3,COPS6,PSMA4,COMMD10,NAA20,MIEN1,PSMA7,COMMD7,KRTCAP2,NOP10,NSMCE1,PSMD9,LSM5,MRPS24,PSMA3,MRPS10,SEC13,RPL11,WDR48,UBE2V2,NUTF2,MRPL34,WASHC4,NEDD1,ELP6,CNOT11,INTS12,BORCS7,TUBA1C,CENPC,AIMP1,CEPT1,PPP1CA,MED30,V…
GO:CC	Lsm2-8 complex	GO:0120115	1.07576e-05	4.96829	7	110	4	18964	LSM7,LSM5,LSM6,LSM4
GO:CC	cytoplasm	GO:0005737	1.26281e-05	4.89866	11951	110	95	18964	PSMB1,PSMB3,PSMB2,GUK1,EMC7,PSMA1,COMMD6,NUMA1,SRGAP2,VTI1A,SEC61G,PSMA2,PPM1B,GOSR2,HNRNPK,CNOT9,COMMD5,CLEC16A,PFDN1,LSM7,NCBP3,FUBP3,ANAPC10,ARHGEF6,ACAP1,PSMA6,NUDT16,IRF3,COPS6,PSMA4,COMMD10,NAA20,MIEN1,PSMA7,COMMD7,KRTCAP2,PSMD9,LSM5,MRPS24,PSMA3,MRPS10,SEC13,RPL11,WDR48,UBE2V2,NUTF2,MRPL34,WASHC4,NEDD1,PFDN6,HPS3,ELP6,CNOT11,BORCS7,TUBA1C,ABI3,CENPC,AIMP1,CEPT1,PPP1CA,VMA21,KCMF1,PIH1D1,UP…
GO:CC	P-body	GO:0000932	1.9484e-05	4.71032	93	110	8	18964	PSMA2,CNOT9,PSMA6,PSMA4,LSM6,LSM14A,CNOT7,LSM4
GO:CC	membrane-bounded organelle	GO:0043227	2.03059e-05	4.69238	13201	110	100	18964	PSMB1,PSMB3,PSMB2,EMC7,PSMA1,COMMD6,NUMA1,SRGAP2,VTI1A,SMARCC2,ZBTB8OS,SEC61G,PSMA2,PPM1B,GOSR2,HNRNPK,CNOT9,COMMD5,SCAF11,CLEC16A,LSM7,NCBP3,FUBP3,MED11,ANAPC10,ACAP1,PSMA6,NUDT16,IRF3,COPS6,PSMA4,COMMD10,NAA20,MIEN1,PSMA7,COMMD7,KRTCAP2,NOP10,NSMCE1,PSMD9,LSM5,MRPS24,PSMA3,MRPS10,SEC13,RPL11,WDR48,UBE2V2,NUTF2,MRPL34,WASHC4,NEDD1,ELP6,CNOT11,INTS12,BORCS7,TUBA1C,CENPC,AIMP1,CEPT1,PPP1CA,MED30,V…
GO:CC	U6 snRNP	GO:0005688	2.1419e-05	4.6692	8	110	4	18964	LSM7,LSM5,LSM6,LSM4
GO:CC	nuclear protein-containing complex	GO:0140513	3.74647e-05	4.42638	1236	110	24	18964	SMARCC2,HNRNPK,LSM7,MED11,ANAPC10,COPS6,NOP10,LSM5,SEC13,NUTF2,INTS12,MED30,UPF2,TRA2A,HSPA6,ELOC,GTF2A1,LSM6,PCF11,TSEN34,MED17,CBFB,LSM4,MED22
GO:CC	organelle	GO:0043226	0.000131932	3.87965	14027	110	102	18964	PSMB1,PSMB3,PSMB2,EMC7,PSMA1,COMMD6,NUMA1,SRGAP2,VTI1A,SMARCC2,ZBTB8OS,SEC61G,PSMA2,PPM1B,GOSR2,HNRNPK,CNOT9,COMMD5,SCAF11,CLEC16A,LSM7,NCBP3,FUBP3,MED11,ANAPC10,ACAP1,PSMA6,NUDT16,IRF3,COPS6,PSMA4,COMMD10,NAA20,MIEN1,PSMA7,COMMD7,KRTCAP2,NOP10,NSMCE1,PSMD9,LSM5,MRPS24,PSMA3,MRPS10,SEC13,RPL11,WDR48,UBE2V2,NUTF2,MRPL34,WASHC4,NEDD1,ELP6,CNOT11,INTS12,BORCS7,TUBA1C,ABI3,CENPC,AIMP1,CEPT1,PPP1CA,ME…
GO:CC	cytoplasmic ribonucleoprotein granule	GO:0036464	0.000365171	3.4375	238	110	10	18964	PSMA2,HNRNPK,CNOT9,PSMA6,PSMA4,UPF2,LSM6,LSM14A,CNOT7,LSM4
GO:CC	ribonucleoprotein granule	GO:0035770	0.000611161	3.21384	252	110	10	18964	PSMA2,HNRNPK,CNOT9,PSMA6,PSMA4,UPF2,LSM6,LSM14A,CNOT7,LSM4
GO:CC	prefoldin complex	GO:0016272	0.00189962	2.72133	7	110	3	18964	PFDN1,PFDN6,VBP1
GO:CC	proteasome core complex, beta-subunit complex	GO:0019774	0.00880489	2.05528	11	110	3	18964	PSMB1,PSMB3,PSMB2
GO:CC	spliceosomal tri-snRNP complex	GO:0097526	0.00988333	2.0051	32	110	4	18964	LSM7,LSM5,LSM6,LSM4
GO:CC	U4/U6 x U5 tri-snRNP complex	GO:0046540	0.00988333	2.0051	32	110	4	18964	LSM7,LSM5,LSM6,LSM4
GO:CC	polysome	GO:0005844	0.0178904	1.74738	72	110	5	18964	PSMA1,PSMA6,RPL11,UPF2,VBP1
GO:CC	CCR4-NOT complex	GO:0030014	0.0292577	1.53376	16	110	3	18964	CNOT9,CNOT11,CNOT7
GO:CC	mediator complex	GO:0016592	0.0294209	1.53134	42	110	4	18964	MED11,MED30,MED17,MED22
GO:CC	ribosomal subunit	GO:0044391	0.0363446	1.43956	191	110	7	18964	MRPS24,MRPS10,RPL11,MRPL34,RPL37A,MRPL55,MRPS18B
GO:CC	mitochondrial ribosome	GO:0005761	0.0465425	1.33215	88	110	5	18964	MRPS24,MRPS10,MRPL34,MRPL55,MRPS18B
GO:CC	organellar ribosome	GO:0000313	0.0465425	1.33215	88	110	5	18964	MRPS24,MRPS10,MRPL34,MRPL55,MRPS18B
KEGG	Proteasome	KEGG:03050	1.37374e-12	11.8621	46	60	11	8000	PSMB1,PSMB3,PSMB2,PSMA1,PSMA2,PSMA6,PSMA4,PSMA7,PSMD9,PSMA3,PSMD4
KEGG	Spinocerebellar ataxia	KEGG:05017	4.76104e-07	6.3223	142	60	11	8000	PSMB1,PSMB3,PSMB2,PSMA1,PSMA2,PSMA6,PSMA4,PSMA7,PSMD9,PSMA3,PSMD4
KEGG	Prion disease	KEGG:05020	6.91495e-07	6.16021	273	60	14	8000	PSMB1,PSMB3,PSMB2,PSMA1,PSMA2,PSMA6,PSMA4,PSMA7,PSMD9,PSMA3,TUBA1C,HSPA6,TUBB8,PSMD4
KEGG	Parkinson disease	KEGG:05012	2.06816e-06	5.68442	249	60	13	8000	PSMB1,PSMB3,PSMB2,PSMA1,PSMA2,PSMA6,PSMA4,PSMA7,PSMD9,PSMA3,TUBA1C,TUBB8,PSMD4
KEGG	Amyotrophic lateral sclerosis	KEGG:05014	3.43422e-06	5.46417	363	60	15	8000	PSMB1,PSMB3,PSMB2,PSMA1,PSMA2,PSMA6,PSMA4,PSMA7,PSMD9,PSMA3,SEC13,TUBA1C,TUBB8,SRSF7,PSMD4
KEGG	Huntington disease	KEGG:05016	2.32675e-05	4.63325	306	60	13	8000	PSMB1,PSMB3,PSMB2,PSMA1,PSMA2,PSMA6,PSMA4,PSMA7,PSMD9,PSMA3,TUBA1C,TUBB8,PSMD4
KEGG	Alzheimer disease	KEGG:05010	3.01676e-05	4.52046	369	60	14	8000	PSMB1,PSMB3,PSMB2,PSMA1,PSMA2,PSMA6,PSMA4,PSMA7,PSMD9,PSMA3,TUBA1C,NFKB1,TUBB8,PSMD4
KEGG	RNA degradation	KEGG:03018	0.0001388	3.85761	79	60	7	8000	CNOT9,LSM7,NUDT16,LSM5,LSM6,CNOT7,LSM4
KEGG	Pathways of neurodegeneration - multiple diseases	KEGG:05022	0.000605144	3.21814	475	60	14	8000	PSMB1,PSMB3,PSMB2,PSMA1,PSMA2,PSMA6,PSMA4,PSMA7,PSMD9,PSMA3,TUBA1C,NFKB1,TUBB8,PSMD4
KEGG	Spliceosome	KEGG:03040	0.0011116	2.95405	150	60	8	8000	HNRNPK,LSM7,LSM5,TRA2A,HSPA6,LSM6,SRSF7,LSM4
REAC	Metabolism of RNA	REAC:R-HSA-8953854	4.53841e-13	12.3431	662	85	30	10622	PSMB1,PSMB3,PSMB2,PSMA1,ZBTB8OS,PSMA2,HNRNPK,CNOT9,LSM7,PSMA6,PSMA4,PSMA7,NOP10,PSMD9,LSM5,PSMA3,SEC13,RPL11,CNOT11,UPF2,XPO1,RPL37A,LSM6,SRSF7,PSMD4,PCF11,TSEN34,CNOT7,LSM4,TNPO1
REAC	Vif-mediated degradation of APOBEC3G	REAC:R-HSA-180585	2.4473e-12	11.6113	53	85	12	10622	PSMB1,PSMB3,PSMB2,PSMA1,PSMA2,PSMA6,PSMA4,PSMA7,PSMD9,PSMA3,ELOC,PSMD4
REAC	Regulation of RUNX3 expression and activity	REAC:R-HSA-8941858	3.12651e-12	11.5049	54	85	12	10622	PSMB1,PSMB3,PSMB2,PSMA1,PSMA2,PSMA6,PSMA4,PSMA7,PSMD9,PSMA3,PSMD4,CBFB
REAC	Mitotic Anaphase	REAC:R-HSA-68882	4.46273e-12	11.3504	228	85	19	10622	PSMB1,PSMB3,PSMB2,PSMA1,PSMA2,ANAPC10,PSMA6,PSMA4,PSMA7,PSMD9,PSMA3,SEC13,TUBA1C,CENPC,XPO1,TUBB8,PSMD4,CHMP4B,TNPO1
REAC	Mitotic Metaphase and Anaphase	REAC:R-HSA-2555396	4.83727e-12	11.3154	229	85	19	10622	PSMB1,PSMB3,PSMB2,PSMA1,PSMA2,ANAPC10,PSMA6,PSMA4,PSMA7,PSMD9,PSMA3,SEC13,TUBA1C,CENPC,XPO1,TUBB8,PSMD4,CHMP4B,TNPO1
REAC	The role of GTSE1 in G2/M progression after G2 checkpoint	REAC:R-HSA-8852276	1.42445e-11	10.8464	79	85	13	10622	PSMB1,PSMB3,PSMB2,PSMA1,PSMA2,PSMA6,PSMA4,PSMA7,PSMD9,PSMA3,TUBA1C,TUBB8,PSMD4
REAC	Autodegradation of Cdh1 by Cdh1:APC/C	REAC:R-HSA-174084	2.80837e-11	10.5515	64	85	12	10622	PSMB1,PSMB3,PSMB2,PSMA1,PSMA2,ANAPC10,PSMA6,PSMA4,PSMA7,PSMD9,PSMA3,PSMD4
REAC	Separation of Sister Chromatids	REAC:R-HSA-2467813	3.43408e-11	10.4642	188	85	17	10622	PSMB1,PSMB3,PSMB2,PSMA1,PSMA2,ANAPC10,PSMA6,PSMA4,PSMA7,PSMD9,PSMA3,SEC13,TUBA1C,CENPC,XPO1,TUBB8,PSMD4
REAC	Oxygen-dependent proline hydroxylation of Hypoxia-inducible Factor Alpha	REAC:R-HSA-1234176	4.15618e-11	10.3813	66	85	12	10622	PSMB1,PSMB3,PSMB2,PSMA1,PSMA2,PSMA6,PSMA4,PSMA7,PSMD9,PSMA3,ELOC,PSMD4
REAC	Regulation of mRNA stability by proteins that bind AU-rich elements	REAC:R-HSA-450531	4.49341e-11	10.3474	86	85	13	10622	PSMB1,PSMB3,PSMB2,PSMA1,PSMA2,PSMA6,PSMA4,PSMA7,PSMD9,PSMA3,XPO1,PSMD4,TNPO1
REAC	Regulation of activated PAK-2p34 by proteasome mediated degradation	REAC:R-HSA-211733	4.96863e-11	10.3038	50	85	11	10622	PSMB1,PSMB3,PSMB2,PSMA1,PSMA2,PSMA6,PSMA4,PSMA7,PSMD9,PSMA3,PSMD4
REAC	Cross-presentation of soluble exogenous antigens (endosomes)	REAC:R-HSA-1236978	4.96863e-11	10.3038	50	85	11	10622	PSMB1,PSMB3,PSMB2,PSMA1,PSMA2,PSMA6,PSMA4,PSMA7,PSMD9,PSMA3,PSMD4
REAC	Activation of NF-kappaB in B cells	REAC:R-HSA-1169091	5.03074e-11	10.2984	67	85	12	10622	PSMB1,PSMB3,PSMB2,PSMA1,PSMA2,PSMA6,PSMA4,PSMA7,PSMD9,PSMA3,NFKB1,PSMD4
REAC	APC/C:Cdc20 mediated degradation of Securin	REAC:R-HSA-174154	6.06986e-11	10.2168	68	85	12	10622	PSMB1,PSMB3,PSMB2,PSMA1,PSMA2,ANAPC10,PSMA6,PSMA4,PSMA7,PSMD9,PSMA3,PSMD4
REAC	Regulation of ornithine decarboxylase (ODC)	REAC:R-HSA-350562	6.29444e-11	10.201	51	85	11	10622	PSMB1,PSMB3,PSMB2,PSMA1,PSMA2,PSMA6,PSMA4,PSMA7,PSMD9,PSMA3,PSMD4
REAC	Ubiquitin-dependent degradation of Cyclin D	REAC:R-HSA-75815	7.93208e-11	10.1006	52	85	11	10622	PSMB1,PSMB3,PSMB2,PSMA1,PSMA2,PSMA6,PSMA4,PSMA7,PSMD9,PSMA3,PSMD4
REAC	Vpu mediated degradation of CD4	REAC:R-HSA-180534	7.93208e-11	10.1006	52	85	11	10622	PSMB1,PSMB3,PSMB2,PSMA1,PSMA2,PSMA6,PSMA4,PSMA7,PSMD9,PSMA3,PSMD4
REAC	p53-Independent DNA Damage Response	REAC:R-HSA-69610	7.93208e-11	10.1006	52	85	11	10622	PSMB1,PSMB3,PSMB2,PSMA1,PSMA2,PSMA6,PSMA4,PSMA7,PSMD9,PSMA3,PSMD4
REAC	Autodegradation of the E3 ubiquitin ligase COP1	REAC:R-HSA-349425	7.93208e-11	10.1006	52	85	11	10622	PSMB1,PSMB3,PSMB2,PSMA1,PSMA2,PSMA6,PSMA4,PSMA7,PSMD9,PSMA3,PSMD4
REAC	p53-Independent G1/S DNA damage checkpoint	REAC:R-HSA-69613	7.93208e-11	10.1006	52	85	11	10622	PSMB1,PSMB3,PSMB2,PSMA1,PSMA2,PSMA6,PSMA4,PSMA7,PSMD9,PSMA3,PSMD4
REAC	Ubiquitin Mediated Degradation of Phosphorylated Cdc25A	REAC:R-HSA-69601	7.93208e-11	10.1006	52	85	11	10622	PSMB1,PSMB3,PSMB2,PSMA1,PSMA2,PSMA6,PSMA4,PSMA7,PSMD9,PSMA3,PSMD4
REAC	Neddylation	REAC:R-HSA-8951664	9.10494e-11	10.0407	233	85	18	10622	PSMB1,PSMB3,PSMB2,PSMA1,COMMD6,PSMA2,COMMD5,PSMA6,COPS6,PSMA4,COMMD10,PSMA7,COMMD7,PSMD9,PSMA3,COMMD1,ELOC,PSMD4
REAC	Negative regulation of NOTCH4 signaling	REAC:R-HSA-9604323	9.94543e-11	10.0024	53	85	11	10622	PSMB1,PSMB3,PSMB2,PSMA1,PSMA2,PSMA6,PSMA4,PSMA7,PSMD9,PSMA3,PSMD4
REAC	Regulation of Apoptosis	REAC:R-HSA-169911	9.94543e-11	10.0024	53	85	11	10622	PSMB1,PSMB3,PSMB2,PSMA1,PSMA2,PSMA6,PSMA4,PSMA7,PSMD9,PSMA3,PSMD4
REAC	Regulation of RUNX2 expression and activity	REAC:R-HSA-8939902	1.0469e-10	9.98009	71	85	12	10622	PSMB1,PSMB3,PSMB2,PSMA1,PSMA2,PSMA6,PSMA4,PSMA7,PSMD9,PSMA3,PSMD4,CBFB
REAC	AUF1 (hnRNP D0) binds and destabilizes mRNA	REAC:R-HSA-450408	1.24096e-10	9.90624	54	85	11	10622	PSMB1,PSMB3,PSMB2,PSMA1,PSMA2,PSMA6,PSMA4,PSMA7,PSMD9,PSMA3,PSMD4
REAC	CDK-mediated phosphorylation and removal of Cdc6	REAC:R-HSA-69017	1.48433e-10	9.82847	73	85	12	10622	PSMB1,PSMB3,PSMB2,PSMA1,PSMA2,ANAPC10,PSMA6,PSMA4,PSMA7,PSMD9,PSMA3,PSMD4
REAC	Cdc20:Phospho-APC/C mediated degradation of Cyclin A	REAC:R-HSA-174184	1.48433e-10	9.82847	73	85	12	10622	PSMB1,PSMB3,PSMB2,PSMA1,PSMA2,ANAPC10,PSMA6,PSMA4,PSMA7,PSMD9,PSMA3,PSMD4
REAC	SCF-beta-TrCP mediated degradation of Emi1	REAC:R-HSA-174113	1.54127e-10	9.81212	55	85	11	10622	PSMB1,PSMB3,PSMB2,PSMA1,PSMA2,PSMA6,PSMA4,PSMA7,PSMD9,PSMA3,PSMD4
REAC	Degradation of AXIN	REAC:R-HSA-4641257	1.54127e-10	9.81212	55	85	11	10622	PSMB1,PSMB3,PSMB2,PSMA1,PSMA2,PSMA6,PSMA4,PSMA7,PSMD9,PSMA3,PSMD4
REAC	FBXL7 down-regulates AURKA during mitotic entry and in early mitosis	REAC:R-HSA-8854050	1.54127e-10	9.81212	55	85	11	10622	PSMB1,PSMB3,PSMB2,PSMA1,PSMA2,PSMA6,PSMA4,PSMA7,PSMD9,PSMA3,PSMD4
REAC	APC:Cdc20 mediated degradation of cell cycle proteins prior to satisfation of the cell cycle checkpoint	REAC:R-HSA-179419	1.76033e-10	9.75441	74	85	12	10622	PSMB1,PSMB3,PSMB2,PSMA1,PSMA2,ANAPC10,PSMA6,PSMA4,PSMA7,PSMD9,PSMA3,PSMD4
REAC	APC/C:Cdh1 mediated degradation of Cdc20 and other APC/C:Cdh1 targeted proteins in late mitosis/early G1	REAC:R-HSA-174178	1.76033e-10	9.75441	74	85	12	10622	PSMB1,PSMB3,PSMB2,PSMA1,PSMA2,ANAPC10,PSMA6,PSMA4,PSMA7,PSMD9,PSMA3,PSMD4
REAC	Hh mutants are degraded by ERAD	REAC:R-HSA-5362768	1.90574e-10	9.71994	56	85	11	10622	PSMB1,PSMB3,PSMB2,PSMA1,PSMA2,PSMA6,PSMA4,PSMA7,PSMD9,PSMA3,PSMD4
REAC	Cellular response to hypoxia	REAC:R-HSA-1234174	2.08228e-10	9.68146	75	85	12	10622	PSMB1,PSMB3,PSMB2,PSMA1,PSMA2,PSMA6,PSMA4,PSMA7,PSMD9,PSMA3,ELOC,PSMD4
REAC	Degradation of DVL	REAC:R-HSA-4641258	2.34634e-10	9.62961	57	85	11	10622	PSMB1,PSMB3,PSMB2,PSMA1,PSMA2,PSMA6,PSMA4,PSMA7,PSMD9,PSMA3,PSMD4
REAC	Stabilization of p53	REAC:R-HSA-69541	2.34634e-10	9.62961	57	85	11	10622	PSMB1,PSMB3,PSMB2,PSMA1,PSMA2,PSMA6,PSMA4,PSMA7,PSMD9,PSMA3,PSMD4
REAC	APC/C:Cdc20 mediated degradation of mitotic proteins	REAC:R-HSA-176409	2.45696e-10	9.6096	76	85	12	10622	PSMB1,PSMB3,PSMB2,PSMA1,PSMA2,ANAPC10,PSMA6,PSMA4,PSMA7,PSMD9,PSMA3,PSMD4
REAC	Metabolism of polyamines	REAC:R-HSA-351202	2.87694e-10	9.54107	58	85	11	10622	PSMB1,PSMB3,PSMB2,PSMA1,PSMA2,PSMA6,PSMA4,PSMA7,PSMD9,PSMA3,PSMD4
REAC	Activation of APC/C and APC/C:Cdc20 mediated degradation of mitotic proteins	REAC:R-HSA-176814	2.89201e-10	9.5388	77	85	12	10622	PSMB1,PSMB3,PSMB2,PSMA1,PSMA2,ANAPC10,PSMA6,PSMA4,PSMA7,PSMD9,PSMA3,PSMD4
REAC	Host Interactions of HIV factors	REAC:R-HSA-162909	3.39158e-10	9.4696	125	85	14	10622	PSMB1,PSMB3,PSMB2,PSMA1,PSMA2,PSMA6,PSMA4,PSMA7,PSMD9,PSMA3,SEC13,XPO1,ELOC,PSMD4
REAC	NIK-->noncanonical NF-kB signaling	REAC:R-HSA-5676590	3.51358e-10	9.45425	59	85	11	10622	PSMB1,PSMB3,PSMB2,PSMA1,PSMA2,PSMA6,PSMA4,PSMA7,PSMD9,PSMA3,PSMD4
REAC	CDT1 association with the CDC6:ORC:origin complex	REAC:R-HSA-68827	3.51358e-10	9.45425	59	85	11	10622	PSMB1,PSMB3,PSMB2,PSMA1,PSMA2,PSMA6,PSMA4,PSMA7,PSMD9,PSMA3,PSMD4
REAC	Hh mutants abrogate ligand secretion	REAC:R-HSA-5387390	3.51358e-10	9.45425	59	85	11	10622	PSMB1,PSMB3,PSMB2,PSMA1,PSMA2,PSMA6,PSMA4,PSMA7,PSMD9,PSMA3,PSMD4
REAC	Degradation of GLI1 by the proteasome	REAC:R-HSA-5610780	4.27479e-10	9.36909	60	85	11	10622	PSMB1,PSMB3,PSMB2,PSMA1,PSMA2,PSMA6,PSMA4,PSMA7,PSMD9,PSMA3,PSMD4
REAC	SCF(Skp2)-mediated degradation of p27/p21	REAC:R-HSA-187577	4.27479e-10	9.36909	60	85	11	10622	PSMB1,PSMB3,PSMB2,PSMA1,PSMA2,PSMA6,PSMA4,PSMA7,PSMD9,PSMA3,PSMD4
REAC	Dectin-1 mediated noncanonical NF-kB signaling	REAC:R-HSA-5607761	4.27479e-10	9.36909	60	85	11	10622	PSMB1,PSMB3,PSMB2,PSMA1,PSMA2,PSMA6,PSMA4,PSMA7,PSMD9,PSMA3,PSMD4
REAC	GLI3 is processed to GLI3R by the proteasome	REAC:R-HSA-5610785	4.27479e-10	9.36909	60	85	11	10622	PSMB1,PSMB3,PSMB2,PSMA1,PSMA2,PSMA6,PSMA4,PSMA7,PSMD9,PSMA3,PSMD4
REAC	Degradation of GLI2 by the proteasome	REAC:R-HSA-5610783	4.27479e-10	9.36909	60	85	11	10622	PSMB1,PSMB3,PSMB2,PSMA1,PSMA2,PSMA6,PSMA4,PSMA7,PSMD9,PSMA3,PSMD4
REAC	Downstream signaling events of B Cell Receptor (BCR)	REAC:R-HSA-1168372	4.6511e-10	9.33244	80	85	12	10622	PSMB1,PSMB3,PSMB2,PSMA1,PSMA2,PSMA6,PSMA4,PSMA7,PSMD9,PSMA3,NFKB1,PSMD4
REAC	Defective CFTR causes cystic fibrosis	REAC:R-HSA-5678895	5.18184e-10	9.28552	61	85	11	10622	PSMB1,PSMB3,PSMB2,PSMA1,PSMA2,PSMA6,PSMA4,PSMA7,PSMD9,PSMA3,PSMD4
REAC	Regulation of APC/C activators between G1/S and early anaphase	REAC:R-HSA-176408	5.4252e-10	9.26558	81	85	12	10622	PSMB1,PSMB3,PSMB2,PSMA1,PSMA2,ANAPC10,PSMA6,PSMA4,PSMA7,PSMD9,PSMA3,PSMD4
REAC	ER-Phagosome pathway	REAC:R-HSA-1236974	7.33497e-10	9.1346	83	85	12	10622	PSMB1,PSMB3,PSMB2,PSMA1,SEC61G,PSMA2,PSMA6,PSMA4,PSMA7,PSMD9,PSMA3,PSMD4
REAC	Asymmetric localization of PCP proteins	REAC:R-HSA-4608870	9.0401e-10	9.04383	64	85	11	10622	PSMB1,PSMB3,PSMB2,PSMA1,PSMA2,PSMA6,PSMA4,PSMA7,PSMD9,PSMA3,PSMD4
REAC	Hedgehog ligand biogenesis	REAC:R-HSA-5358346	1.08119e-09	8.9661	65	85	11	10622	PSMB1,PSMB3,PSMB2,PSMA1,PSMA2,PSMA6,PSMA4,PSMA7,PSMD9,PSMA3,PSMD4
REAC	p53-Dependent G1 DNA Damage Response	REAC:R-HSA-69563	1.28911e-09	8.88971	66	85	11	10622	PSMB1,PSMB3,PSMB2,PSMA1,PSMA2,PSMA6,PSMA4,PSMA7,PSMD9,PSMA3,PSMD4
REAC	p53-Dependent G1/S DNA damage checkpoint	REAC:R-HSA-69580	1.28911e-09	8.88971	66	85	11	10622	PSMB1,PSMB3,PSMB2,PSMA1,PSMA2,PSMA6,PSMA4,PSMA7,PSMD9,PSMA3,PSMD4
REAC	Regulation of mitotic cell cycle	REAC:R-HSA-453276	1.50644e-09	8.82205	88	85	12	10622	PSMB1,PSMB3,PSMB2,PSMA1,PSMA2,ANAPC10,PSMA6,PSMA4,PSMA7,PSMD9,PSMA3,PSMD4
REAC	APC/C-mediated degradation of cell cycle proteins	REAC:R-HSA-174143	1.50644e-09	8.82205	88	85	12	10622	PSMB1,PSMB3,PSMB2,PSMA1,PSMA2,ANAPC10,PSMA6,PSMA4,PSMA7,PSMD9,PSMA3,PSMD4
REAC	Regulation of RAS by GAPs	REAC:R-HSA-5658442	1.53245e-09	8.81461	67	85	11	10622	PSMB1,PSMB3,PSMB2,PSMA1,PSMA2,PSMA6,PSMA4,PSMA7,PSMD9,PSMA3,PSMD4
REAC	MAPK6/MAPK4 signaling	REAC:R-HSA-5687128	1.73011e-09	8.76193	89	85	12	10622	PSMB1,PSMB3,PSMB2,PSMA1,PSMA2,PSMA6,PSMA4,PSMA7,PSMD9,PSMA3,XPO1,PSMD4
REAC	Regulation of expression of SLITs and ROBOs	REAC:R-HSA-9010553	1.78784e-09	8.74767	171	85	15	10622	PSMB1,PSMB3,PSMB2,PSMA1,PSMA2,PSMA6,PSMA4,PSMA7,PSMD9,PSMA3,RPL11,UPF2,RPL37A,ELOC,PSMD4
REAC	G1/S DNA Damage Checkpoints	REAC:R-HSA-69615	1.81647e-09	8.74077	68	85	11	10622	PSMB1,PSMB3,PSMB2,PSMA1,PSMA2,PSMA6,PSMA4,PSMA7,PSMD9,PSMA3,PSMD4
REAC	Assembly of the pre-replicative complex	REAC:R-HSA-68867	1.81647e-09	8.74077	68	85	11	10622	PSMB1,PSMB3,PSMB2,PSMA1,PSMA2,PSMA6,PSMA4,PSMA7,PSMD9,PSMA3,PSMD4
REAC	M Phase	REAC:R-HSA-68886	1.88215e-09	8.72535	407	85	21	10622	PSMB1,PSMB3,PSMB2,PSMA1,NUMA1,PSMA2,ANAPC10,PSMA6,PSMA4,PSMA7,PSMD9,PSMA3,SEC13,NEDD1,TUBA1C,CENPC,XPO1,TUBB8,PSMD4,CHMP4B,TNPO1
REAC	Regulation of PTEN stability and activity	REAC:R-HSA-8948751	2.14713e-09	8.66814	69	85	11	10622	PSMB1,PSMB3,PSMB2,PSMA1,PSMA2,PSMA6,PSMA4,PSMA7,PSMD9,PSMA3,PSMD4
REAC	Switching of origins to a post-replicative state	REAC:R-HSA-69052	2.27029e-09	8.64392	91	85	12	10622	PSMB1,PSMB3,PSMB2,PSMA1,PSMA2,ANAPC10,PSMA6,PSMA4,PSMA7,PSMD9,PSMA3,PSMD4
REAC	Orc1 removal from chromatin	REAC:R-HSA-68949	2.97597e-09	8.52637	71	85	11	10622	PSMB1,PSMB3,PSMB2,PSMA1,PSMA2,PSMA6,PSMA4,PSMA7,PSMD9,PSMA3,PSMD4
REAC	Transcriptional regulation by RUNX3	REAC:R-HSA-8878159	3.37099e-09	8.47224	94	85	12	10622	PSMB1,PSMB3,PSMB2,PSMA1,PSMA2,PSMA6,PSMA4,PSMA7,PSMD9,PSMA3,PSMD4,CBFB
REAC	Signaling by ROBO receptors	REAC:R-HSA-376176	4.64919e-09	8.33262	217	85	16	10622	PSMB1,PSMB3,PSMB2,PSMA1,SRGAP2,PSMA2,PSMA6,PSMA4,PSMA7,PSMD9,PSMA3,RPL11,UPF2,RPL37A,ELOC,PSMD4
REAC	CLEC7A (Dectin-1) signaling	REAC:R-HSA-5607764	4.93644e-09	8.30659	97	85	12	10622	PSMB1,PSMB3,PSMB2,PSMA1,PSMA2,PSMA6,PSMA4,PSMA7,PSMD9,PSMA3,NFKB1,PSMD4
REAC	Downstream TCR signaling	REAC:R-HSA-202424	5.58937e-09	8.25264	98	85	12	10622	PSMB1,PSMB3,PSMB2,PSMA1,PSMA2,PSMA6,PSMA4,PSMA7,PSMD9,PSMA3,NFKB1,PSMD4
REAC	Antigen processing-Cross presentation	REAC:R-HSA-1236975	6.31976e-09	8.1993	99	85	12	10622	PSMB1,PSMB3,PSMB2,PSMA1,SEC61G,PSMA2,PSMA6,PSMA4,PSMA7,PSMD9,PSMA3,PSMD4
REAC	ABC transporter disorders	REAC:R-HSA-5619084	7.47184e-09	8.12657	77	85	11	10622	PSMB1,PSMB3,PSMB2,PSMA1,PSMA2,PSMA6,PSMA4,PSMA7,PSMD9,PSMA3,PSMD4
REAC	Interleukin-1 signaling	REAC:R-HSA-9020702	8.04622e-09	8.09441	101	85	12	10622	PSMB1,PSMB3,PSMB2,PSMA1,PSMA2,PSMA6,PSMA4,PSMA7,PSMD9,PSMA3,NFKB1,PSMD4
REAC	HIV Infection	REAC:R-HSA-162906	8.61899e-09	8.06454	226	85	16	10622	PSMB1,PSMB3,PSMB2,PSMA1,PSMA2,PSMA6,PSMA4,PSMA7,PSMD9,PSMA3,SEC13,XPO1,ELOC,GTF2A1,PSMD4,CHMP4B
REAC	G2/M Transition	REAC:R-HSA-69275	1.28546e-08	7.89094	196	85	15	10622	PSMB1,PSMB3,PSMB2,PSMA1,PSMA2,PSMA6,PSMA4,PSMA7,PSMD9,PSMA3,NEDD1,TUBA1C,XPO1,TUBB8,PSMD4
REAC	Signaling by NOTCH4	REAC:R-HSA-9013694	1.32136e-08	7.87898	81	85	11	10622	PSMB1,PSMB3,PSMB2,PSMA1,PSMA2,PSMA6,PSMA4,PSMA7,PSMD9,PSMA3,PSMD4
REAC	Mitotic G2-G2/M phases	REAC:R-HSA-453274	1.48667e-08	7.82779	198	85	15	10622	PSMB1,PSMB3,PSMB2,PSMA1,PSMA2,PSMA6,PSMA4,PSMA7,PSMD9,PSMA3,NEDD1,TUBA1C,XPO1,TUBB8,PSMD4
REAC	Cyclin E associated events during G1/S transition	REAC:R-HSA-69202	1.73675e-08	7.76026	83	85	11	10622	PSMB1,PSMB3,PSMB2,PSMA1,PSMA2,PSMA6,PSMA4,PSMA7,PSMD9,PSMA3,PSMD4
REAC	Degradation of beta-catenin by the destruction complex	REAC:R-HSA-195253	1.73675e-08	7.76026	83	85	11	10622	PSMB1,PSMB3,PSMB2,PSMA1,PSMA2,PSMA6,PSMA4,PSMA7,PSMD9,PSMA3,PSMD4
REAC	DNA Replication Pre-Initiation	REAC:R-HSA-69002	2.26617e-08	7.64471	85	85	11	10622	PSMB1,PSMB3,PSMB2,PSMA1,PSMA2,PSMA6,PSMA4,PSMA7,PSMD9,PSMA3,PSMD4
REAC	Hedgehog 'on' state	REAC:R-HSA-5632684	2.26617e-08	7.64471	85	85	11	10622	PSMB1,PSMB3,PSMB2,PSMA1,PSMA2,PSMA6,PSMA4,PSMA7,PSMD9,PSMA3,PSMD4
REAC	Cyclin A:Cdk2-associated events at S phase entry	REAC:R-HSA-69656	2.26617e-08	7.64471	85	85	11	10622	PSMB1,PSMB3,PSMB2,PSMA1,PSMA2,PSMA6,PSMA4,PSMA7,PSMD9,PSMA3,PSMD4
REAC	Hedgehog 'off' state	REAC:R-HSA-5610787	3.089e-08	7.51018	113	85	12	10622	PSMB1,PSMB3,PSMB2,PSMA1,PSMA2,PSMA6,PSMA4,PSMA7,PSMD9,PSMA3,TUBA1C,PSMD4
REAC	Transcriptional regulation by RUNX2	REAC:R-HSA-8878166	5.16508e-08	7.28692	118	85	12	10622	PSMB1,PSMB3,PSMB2,PSMA1,PSMA2,PSMA6,PSMA4,PSMA7,PSMD9,PSMA3,PSMD4,CBFB
REAC	PCP/CE pathway	REAC:R-HSA-4086400	5.45803e-08	7.26296	92	85	11	10622	PSMB1,PSMB3,PSMB2,PSMA1,PSMA2,PSMA6,PSMA4,PSMA7,PSMD9,PSMA3,PSMD4
REAC	TCR signaling	REAC:R-HSA-202403	6.30137e-08	7.20056	120	85	12	10622	PSMB1,PSMB3,PSMB2,PSMA1,PSMA2,PSMA6,PSMA4,PSMA7,PSMD9,PSMA3,NFKB1,PSMD4
REAC	Synthesis of DNA	REAC:R-HSA-69239	6.30137e-08	7.20056	120	85	12	10622	PSMB1,PSMB3,PSMB2,PSMA1,PSMA2,ANAPC10,PSMA6,PSMA4,PSMA7,PSMD9,PSMA3,PSMD4
REAC	DNA Replication	REAC:R-HSA-69306	1.34725e-07	6.87055	128	85	12	10622	PSMB1,PSMB3,PSMB2,PSMA1,PSMA2,ANAPC10,PSMA6,PSMA4,PSMA7,PSMD9,PSMA3,PSMD4
REAC	TNFR2 non-canonical NF-kB pathway	REAC:R-HSA-5668541	1.36596e-07	6.86456	100	85	11	10622	PSMB1,PSMB3,PSMB2,PSMA1,PSMA2,PSMA6,PSMA4,PSMA7,PSMD9,PSMA3,PSMD4
REAC	UCH proteinases	REAC:R-HSA-5689603	1.52307e-07	6.81728	101	85	11	10622	PSMB1,PSMB3,PSMB2,PSMA1,PSMA2,PSMA6,PSMA4,PSMA7,PSMD9,PSMA3,PSMD4
REAC	RUNX1 regulates transcription of genes involved in differentiation of HSCs	REAC:R-HSA-8939236	1.61566e-07	6.79165	130	85	12	10622	PSMB1,PSMB3,PSMB2,PSMA1,PSMA2,PSMA6,PSMA4,PSMA7,PSMD9,PSMA3,PSMD4,CBFB
REAC	ABC-family proteins mediated transport	REAC:R-HSA-382556	1.88685e-07	6.72426	103	85	11	10622	PSMB1,PSMB3,PSMB2,PSMA1,PSMA2,PSMA6,PSMA4,PSMA7,PSMD9,PSMA3,PSMD4
REAC	C-type lectin receptors (CLRs)	REAC:R-HSA-5621481	2.73606e-07	6.56287	136	85	12	10622	PSMB1,PSMB3,PSMB2,PSMA1,PSMA2,PSMA6,PSMA4,PSMA7,PSMD9,PSMA3,NFKB1,PSMD4
REAC	FCERI mediated NF-kB activation	REAC:R-HSA-2871837	2.73606e-07	6.56287	136	85	12	10622	PSMB1,PSMB3,PSMB2,PSMA1,PSMA2,PSMA6,PSMA4,PSMA7,PSMD9,PSMA3,NFKB1,PSMD4
REAC	Interleukin-1 family signaling	REAC:R-HSA-446652	3.24249e-07	6.48912	138	85	12	10622	PSMB1,PSMB3,PSMB2,PSMA1,PSMA2,PSMA6,PSMA4,PSMA7,PSMD9,PSMA3,NFKB1,PSMD4
REAC	Cell Cycle Checkpoints	REAC:R-HSA-69620	3.52932e-07	6.45231	290	85	16	10622	PSMB1,PSMB3,PSMB2,PSMA1,PSMA2,ANAPC10,PSMA6,PSMA4,PSMA7,PSMD9,PSMA3,SEC13,UBE2V2,CENPC,XPO1,PSMD4
REAC	Cell Cycle, Mitotic	REAC:R-HSA-69278	4.95005e-07	6.30539	549	85	21	10622	PSMB1,PSMB3,PSMB2,PSMA1,NUMA1,PSMA2,ANAPC10,PSMA6,PSMA4,PSMA7,PSMD9,PSMA3,SEC13,NEDD1,TUBA1C,CENPC,XPO1,TUBB8,PSMD4,CHMP4B,TNPO1
REAC	Cell Cycle	REAC:R-HSA-1640170	7.24396e-07	6.14002	679	85	23	10622	PSMB1,PSMB3,PSMB2,PSMA1,NUMA1,PSMA2,ANAPC10,PSMA6,PSMA4,PSMA7,NOP10,PSMD9,PSMA3,SEC13,UBE2V2,NEDD1,TUBA1C,CENPC,XPO1,TUBB8,PSMD4,CHMP4B,TNPO1
REAC	Signaling by Hedgehog	REAC:R-HSA-5358351	7.87311e-07	6.10385	149	85	12	10622	PSMB1,PSMB3,PSMB2,PSMA1,PSMA2,PSMA6,PSMA4,PSMA7,PSMD9,PSMA3,TUBA1C,PSMD4
REAC	S Phase	REAC:R-HSA-69242	2.05174e-06	5.68788	162	85	12	10622	PSMB1,PSMB3,PSMB2,PSMA1,PSMA2,ANAPC10,PSMA6,PSMA4,PSMA7,PSMD9,PSMA3,PSMD4
REAC	Signaling by the B Cell Receptor (BCR)	REAC:R-HSA-983705	2.20063e-06	5.65745	163	85	12	10622	PSMB1,PSMB3,PSMB2,PSMA1,PSMA2,PSMA6,PSMA4,PSMA7,PSMD9,PSMA3,NFKB1,PSMD4
REAC	G1/S Transition	REAC:R-HSA-69206	2.5061e-06	5.601	131	85	11	10622	PSMB1,PSMB3,PSMB2,PSMA1,PSMA2,PSMA6,PSMA4,PSMA7,PSMD9,PSMA3,PSMD4
REAC	G2/M Checkpoints	REAC:R-HSA-69481	3.10143e-06	5.50844	168	85	12	10622	PSMB1,PSMB3,PSMB2,PSMA1,PSMA2,PSMA6,PSMA4,PSMA7,PSMD9,PSMA3,UBE2V2,PSMD4
REAC	Disorders of transmembrane transporters	REAC:R-HSA-5619115	4.32147e-06	5.36437	173	85	12	10622	PSMB1,PSMB3,PSMB2,PSMA1,PSMA2,PSMA6,PSMA4,PSMA7,PSMD9,PSMA3,SEC13,PSMD4
REAC	PTEN Regulation	REAC:R-HSA-6807070	4.34364e-06	5.36215	138	85	11	10622	PSMB1,PSMB3,PSMB2,PSMA1,PSMA2,PSMA6,PSMA4,PSMA7,PSMD9,PSMA3,PSMD4
REAC	Metabolism of proteins	REAC:R-HSA-392499	5.02853e-06	5.29856	2016	85	39	10622	PSMB1,PSMB3,PSMB2,PSMA1,COMMD6,SEC61G,PSMA2,GOSR2,HNRNPK,COMMD5,PFDN1,PSMA6,COPS6,PSMA4,COMMD10,PSMA7,COMMD7,NSMCE1,PSMD9,MRPS24,PSMA3,MRPS10,SEC13,RPL11,WDR48,UBE2V2,MRPL34,PFDN6,TUBA1C,AIMP1,VBP1,RPL37A,TUBB8,COMMD1,ELOC,PSMD4,EIF3G,MRPL55,MRPS18B
REAC	Beta-catenin independent WNT signaling	REAC:R-HSA-3858494	6.31329e-06	5.19974	143	85	11	10622	PSMB1,PSMB3,PSMB2,PSMA1,PSMA2,PSMA6,PSMA4,PSMA7,PSMD9,PSMA3,PSMD4
REAC	Fc epsilon receptor (FCERI) signaling	REAC:R-HSA-2454202	7.6455e-06	5.11659	182	85	12	10622	PSMB1,PSMB3,PSMB2,PSMA1,PSMA2,PSMA6,PSMA4,PSMA7,PSMD9,PSMA3,NFKB1,PSMD4
REAC	Cellular responses to stress	REAC:R-HSA-2262752	8.2075e-06	5.08579	582	85	20	10622	PSMB1,PSMB3,PSMB2,PSMA1,PSMA2,ANAPC10,PSMA6,PSMA4,PSMA7,PSMD9,PSMA3,SEC13,RPL11,TUBA1C,NFKB1,HSPA6,RPL37A,TUBB8,ELOC,PSMD4
REAC	Mitotic G1 phase and G1/S transition	REAC:R-HSA-453279	9.04419e-06	5.04363	148	85	11	10622	PSMB1,PSMB3,PSMB2,PSMA1,PSMA2,PSMA6,PSMA4,PSMA7,PSMD9,PSMA3,PSMD4
REAC	Class I MHC mediated antigen processing & presentation	REAC:R-HSA-983169	1.15577e-05	4.93713	370	85	16	10622	PSMB1,PSMB3,PSMB2,PSMA1,SEC61G,PSMA2,ANAPC10,PSMA6,PSMA4,PSMA7,PSMD9,PSMA3,SEC13,UBE2V2,ELOC,PSMD4
REAC	Cellular responses to external stimuli	REAC:R-HSA-8953897	1.22157e-05	4.91308	596	85	20	10622	PSMB1,PSMB3,PSMB2,PSMA1,PSMA2,ANAPC10,PSMA6,PSMA4,PSMA7,PSMD9,PSMA3,SEC13,RPL11,TUBA1C,NFKB1,HSPA6,RPL37A,TUBB8,ELOC,PSMD4
REAC	Transcriptional regulation by RUNX1	REAC:R-HSA-8878171	1.6041e-05	4.79477	236	85	13	10622	PSMB1,PSMB3,PSMB2,PSMA1,SMARCC2,PSMA2,PSMA6,PSMA4,PSMA7,PSMD9,PSMA3,PSMD4,CBFB
REAC	Apoptosis	REAC:R-HSA-109581	4.80758e-05	4.31807	174	85	11	10622	PSMB1,PSMB3,PSMB2,PSMA1,PSMA2,PSMA6,PSMA4,PSMA7,PSMD9,PSMA3,PSMD4
REAC	Antigen processing: Ubiquitination & Proteasome degradation	REAC:R-HSA-983168	5.09866e-05	4.29254	308	85	14	10622	PSMB1,PSMB3,PSMB2,PSMA1,PSMA2,ANAPC10,PSMA6,PSMA4,PSMA7,PSMD9,PSMA3,UBE2V2,ELOC,PSMD4
REAC	Ub-specific processing proteases	REAC:R-HSA-5689880	6.53599e-05	4.18469	221	85	12	10622	PSMB1,PSMB3,PSMB2,PSMA1,PSMA2,PSMA6,PSMA4,PSMA7,PSMD9,PSMA3,WDR48,PSMD4
REAC	Programmed Cell Death	REAC:R-HSA-5357801	9.46471e-05	4.02389	186	85	11	10622	PSMB1,PSMB3,PSMB2,PSMA1,PSMA2,PSMA6,PSMA4,PSMA7,PSMD9,PSMA3,PSMD4
REAC	Axon guidance	REAC:R-HSA-422475	9.62304e-05	4.01669	549	85	18	10622	PSMB1,PSMB3,PSMB2,PSMA1,SRGAP2,PSMA2,PSMA6,PSMA4,PSMA7,PSMD9,PSMA3,RPL11,TUBA1C,UPF2,RPL37A,TUBB8,ELOC,PSMD4
REAC	Deadenylation-dependent mRNA decay	REAC:R-HSA-429914	0.000107084	3.97027	56	85	7	10622	CNOT9,LSM7,LSM5,CNOT11,LSM6,CNOT7,LSM4
REAC	TCF dependent signaling in response to WNT	REAC:R-HSA-201681	0.000110686	3.95591	232	85	12	10622	PSMB1,PSMB3,PSMB2,PSMA1,PSMA2,PSMA6,PSMA4,PSMA7,PSMD9,PSMA3,XPO1,PSMD4
REAC	Nervous system development	REAC:R-HSA-9675108	0.000185817	3.73092	574	85	18	10622	PSMB1,PSMB3,PSMB2,PSMA1,SRGAP2,PSMA2,PSMA6,PSMA4,PSMA7,PSMD9,PSMA3,RPL11,TUBA1C,UPF2,RPL37A,TUBB8,ELOC,PSMD4
REAC	Developmental Biology	REAC:R-HSA-1266738	0.000447443	3.34926	1116	85	25	10622	PSMB1,PSMB3,PSMB2,PSMA1,SRGAP2,PSMA2,CNOT9,MED11,PSMA6,PSMA4,PSMA7,PSMD9,PSMA3,RPL11,TUBA1C,MED30,UPF2,NFKB1,RPL37A,TUBB8,ELOC,PSMD4,MED17,CBFB,MED22
REAC	Metabolism of amino acids and derivatives	REAC:R-HSA-71291	0.000470783	3.32718	370	85	14	10622	PSMB1,PSMB3,PSMB2,PSMA1,PSMA2,PSMA6,PSMA4,PSMA7,PSMD9,PSMA3,RPL11,AIMP1,RPL37A,PSMD4
REAC	Infectious disease	REAC:R-HSA-5663205	0.000668667	3.17479	909	85	22	10622	PSMB1,PSMB3,PSMB2,PSMA1,PSMA2,HNRNPK,PSMA6,PSMA4,PSMA7,PSMD9,PSMA3,SEC13,RPL11,TUBA1C,NFKB1,XPO1,RPL37A,TUBB8,ELOC,GTF2A1,PSMD4,CHMP4B
REAC	Signaling by NOTCH	REAC:R-HSA-157118	0.000885782	3.05267	233	85	11	10622	PSMB1,PSMB3,PSMB2,PSMA1,PSMA2,PSMA6,PSMA4,PSMA7,PSMD9,PSMA3,PSMD4
REAC	RNA Polymerase II Transcription	REAC:R-HSA-73857	0.00118157	2.92754	1342	85	27	10622	PSMB1,PSMB3,PSMB2,PSMA1,SMARCC2,PSMA2,CNOT9,ANAPC10,PSMA6,PSMA4,PSMA7,PSMD9,PSMA3,CNOT11,INTS12,MED30,NFKB1,ELOC,ZNF143,GTF2A1,SRSF7,PSMD4,PCF11,MED17,CBFB,CNOT7,ARID3A
REAC	Deubiquitination	REAC:R-HSA-5688426	0.00150416	2.82271	297	85	12	10622	PSMB1,PSMB3,PSMB2,PSMA1,PSMA2,PSMA6,PSMA4,PSMA7,PSMD9,PSMA3,WDR48,PSMD4
REAC	mRNA decay by 5' to 3' exoribonuclease	REAC:R-HSA-430039	0.00188932	2.72369	15	85	4	10622	LSM7,LSM5,LSM6,LSM4
REAC	PIP3 activates AKT signaling	REAC:R-HSA-1257604	0.0018898	2.72358	252	85	11	10622	PSMB1,PSMB3,PSMB2,PSMA1,PSMA2,PSMA6,PSMA4,PSMA7,PSMD9,PSMA3,PSMD4
REAC	MAPK family signaling cascades	REAC:R-HSA-5683057	0.00218544	2.66046	308	85	12	10622	PSMB1,PSMB3,PSMB2,PSMA1,PSMA2,PSMA6,PSMA4,PSMA7,PSMD9,PSMA3,XPO1,PSMD4
REAC	Gene expression (Transcription)	REAC:R-HSA-74160	0.00229482	2.63925	1476	85	28	10622	PSMB1,PSMB3,PSMB2,PSMA1,SMARCC2,PSMA2,CNOT9,ANAPC10,PSMA6,PSMA4,PSMA7,PSMD9,PSMA3,SEC13,CNOT11,INTS12,MED30,NFKB1,ELOC,ZNF143,GTF2A1,SRSF7,PSMD4,PCF11,MED17,CBFB,CNOT7,ARID3A
REAC	RAF/MAP kinase cascade	REAC:R-HSA-5673001	0.00294689	2.53064	264	85	11	10622	PSMB1,PSMB3,PSMB2,PSMA1,PSMA2,PSMA6,PSMA4,PSMA7,PSMD9,PSMA3,PSMD4
REAC	MAPK1/MAPK3 signaling	REAC:R-HSA-5684996	0.00352104	2.45333	269	85	11	10622	PSMB1,PSMB3,PSMB2,PSMA1,PSMA2,PSMA6,PSMA4,PSMA7,PSMD9,PSMA3,PSMD4
REAC	Signaling by WNT	REAC:R-HSA-195721	0.00414148	2.38284	328	85	12	10622	PSMB1,PSMB3,PSMB2,PSMA1,PSMA2,PSMA6,PSMA4,PSMA7,PSMD9,PSMA3,XPO1,PSMD4
REAC	Adaptive Immune System	REAC:R-HSA-1280218	0.00517096	2.28643	799	85	19	10622	PSMB1,PSMB3,PSMB2,PSMA1,SEC61G,PSMA2,ANAPC10,PSMA6,PSMA4,PSMA7,PSMD9,PSMA3,SEC13,UBE2V2,TUBA1C,NFKB1,TUBB8,ELOC,PSMD4
REAC	Intracellular signaling by second messengers	REAC:R-HSA-9006925	0.00760531	2.11888	292	85	11	10622	PSMB1,PSMB3,PSMB2,PSMA1,PSMA2,PSMA6,PSMA4,PSMA7,PSMD9,PSMA3,PSMD4
REAC	Post-translational protein modification	REAC:R-HSA-597592	0.0100167	1.99927	1415	85	26	10622	PSMB1,PSMB3,PSMB2,PSMA1,COMMD6,PSMA2,GOSR2,HNRNPK,COMMD5,PSMA6,COPS6,PSMA4,COMMD10,PSMA7,COMMD7,NSMCE1,PSMD9,PSMA3,SEC13,WDR48,UBE2V2,TUBA1C,TUBB8,COMMD1,ELOC,PSMD4
REAC	Diseases of signal transduction by growth factor receptors and second messengers	REAC:R-HSA-5663202	0.017796	1.74968	380	85	12	10622	PSMB1,PSMB3,PSMB2,PSMA1,PSMA2,PSMA6,PSMA4,PSMA7,PSMD9,PSMA3,WDR48,PSMD4
REAC	Prefoldin mediated transfer of substrate to CCT/TriC	REAC:R-HSA-389957	0.0261783	1.58206	28	85	4	10622	PFDN1,PFDN6,TUBA1C,VBP1
REAC	Translation	REAC:R-HSA-72766	0.0414401	1.38258	292	85	10	10622	SEC61G,MRPS24,MRPS10,RPL11,MRPL34,AIMP1,RPL37A,EIF3G,MRPL55,MRPS18B
WP	Proteasome Degradation	WP:WP183	2.92126e-11	10.5344	64	51	11	7562	PSMB1,PSMB3,PSMB2,PSMA1,PSMA2,PSMA6,PSMA4,PSMA7,PSMD9,PSMA3,PSMD4
WP	Cellular Proteostasis	WP:WP4918	0.00121942	2.91385	7	51	3	7562	PFDN1,PFDN6,VBP1
WP	Parkin-Ubiquitin Proteasomal System pathway	WP:WP2359	0.0121996	1.91365	70	51	5	7562	PSMD9,TUBA1C,HSPA6,TUBB8,PSMD4
TF	Factor: Elf-1; motif: NAMCCGGAAGTN	TF:M11447	1.49286e-10	9.82598	7786	114	84	19917	PSMB1,PSMB3,EMC7,COMMD6,NUMA1,SRGAP2,VTI1A,SMARCC2,ZBTB8OS,PSMA2,PPM1B,GOSR2,HNRNPK,CNOT9,COMMD5,SCAF11,LSM7,NCBP3,FUBP3,MED11,PTRHD1,PSMA6,IRF3,COPS6,PSMA4,COMMD10,NAA20,MIEN1,PSMA7,KRTCAP2,NOP10,NSMCE1,PSMD9,LSM5,MRPS24,PSMA3,MRPS10,SEC13,RPL11,WDR48,UBE2V2,NUTF2,MRPL34,WASHC4,NEDD1,KIAA2013,PFDN6,HPS3,ELP6,CNOT11,BORCS7,ABI3,CENPC,CEPT1,PPP1CA,MED30,VMA21,KCMF1,PIH1D1,HSPA6,VBP1,SNX6,RPL37A,ZC…
TF	Factor: Elf-1; motif: NANCCGGAAGTN	TF:M11451	1.80262e-10	9.7441	6956	114	79	19917	PSMB1,PSMB3,EMC7,COMMD6,NUMA1,SRGAP2,VTI1A,SMARCC2,ZBTB8OS,PPM1B,GOSR2,CNOT9,COMMD5,SCAF11,LSM7,FUBP3,MED11,PTRHD1,PSMA6,IRF3,COPS6,PSMA4,COMMD10,NAA20,MIEN1,PSMA7,KRTCAP2,NOP10,NSMCE1,PSMD9,LSM5,MRPS24,PSMA3,MRPS10,SEC13,RPL11,WDR48,UBE2V2,NUTF2,MRPL34,WASHC4,NEDD1,KIAA2013,PFDN6,HPS3,CNOT11,BORCS7,ABI3,CENPC,CEPT1,PPP1CA,MED30,VMA21,KCMF1,PIH1D1,HSPA6,VBP1,SNX6,RPL37A,ZC3H13,TUBB8,COMMD1,NDUFAF…
TF	Factor: Elk-1; motif: NNNNCCGGAARTNN	TF:M00025	5.12219e-09	8.29054	10355	114	95	19917	PSMB1,PSMB3,EMC7,COMMD6,NUMA1,SRGAP2,VTI1A,SMARCC2,ZBTB8OS,SEC61G,PPM1B,GOSR2,HNRNPK,CNOT9,COMMD5,SCAF11,CLEC16A,NCBP3,FUBP3,MED11,PTRHD1,ACAP1,PSMA6,IRF3,COPS6,PSMA4,COMMD10,NAA20,MIEN1,PSMA7,KRTCAP2,NOP10,NSMCE1,PSMD9,LSM5,MRPS24,PSMA3,MRPS10,SEC13,RPL11,WDR48,UBE2V2,NUTF2,MRPL34,WASHC4,NEDD1,PLEKHA2,KIAA2013,PFDN6,HPS3,ELP6,CNOT11,INTS12,BORCS7,TUBA1C,ABI3,CENPC,CEPT1,PPP1CA,MED30,VMA21,KCMF1,…
TF	Factor: c-Ets-1; motif: NNNRCCGGAWRYNNNN	TF:M01078	1.11597e-08	7.95235	7621	114	80	19917	PSMB1,PSMB3,EMC7,COMMD6,NUMA1,SRGAP2,VTI1A,SMARCC2,ZBTB8OS,PPM1B,GOSR2,HNRNPK,CNOT9,COMMD5,SCAF11,NCBP3,FUBP3,MED11,PTRHD1,ARHGEF6,ACAP1,PSMA6,COPS6,PSMA4,COMMD10,NAA20,MIEN1,PSMA7,KRTCAP2,NOP10,NSMCE1,PSMD9,LSM5,MRPS24,PSMA3,MRPS10,SEC13,RPL11,WDR48,UBE2V2,NUTF2,MRPL34,WASHC4,NEDD1,PLEKHA2,KIAA2013,PFDN6,HPS3,ELP6,CNOT11,BORCS7,ABI3,CEPT1,PPP1CA,MED30,VMA21,KCMF1,PIH1D1,MKRN2,NFKB1,SNX6,RPL37A,Z…
TF	Factor: SAP-1; motif: NNCCGGAAGTGN	TF:M09905	1.40017e-08	7.85382	8354	114	84	19917	PSMB1,PSMB3,EMC7,NUMA1,SRGAP2,VTI1A,SMARCC2,ZBTB8OS,SEC61G,PPM1B,GOSR2,HNRNPK,CNOT9,COMMD5,SCAF11,CLEC16A,NCBP3,FUBP3,MED11,PTRHD1,ACAP1,PSMA6,IRF3,COPS6,COMMD10,NAA20,MIEN1,PSMA7,KRTCAP2,NOP10,NSMCE1,PSMD9,LSM5,MRPS24,MRPS10,SEC13,RPL11,WDR48,UBE2V2,NUTF2,MRPL34,WASHC4,NEDD1,KIAA2013,PFDN6,HPS3,ELP6,CNOT11,INTS12,TUBA1C,CENPC,CEPT1,PPP1CA,MED30,VMA21,KCMF1,PIH1D1,HSPA6,VBP1,SNX6,ITSN2,RPL37A,ZC3…
TF	Factor: PEA3; motif: NACCGGAAGTN	TF:M11430	1.97516e-08	7.7044	10973	114	97	19917	PSMB1,PSMB3,GUK1,EMC7,COMMD6,NUMA1,SRGAP2,VTI1A,SMARCC2,ZBTB8OS,SEC61G,PPM1B,GOSR2,HNRNPK,CNOT9,COMMD5,SCAF11,NCBP3,FUBP3,MED11,PTRHD1,ARHGEF6,ACAP1,PSMA6,IRF3,COPS6,PSMA4,COMMD10,NAA20,MIEN1,PSMA7,COMMD7,KRTCAP2,NOP10,NSMCE1,PSMD9,LSM5,MRPS24,PSMA3,MRPS10,SEC13,RPL11,WDR48,UBE2V2,NUTF2,MRPL34,WASHC4,NEDD1,PLEKHA2,KIAA2013,PFDN6,HPS3,ELP6,CNOT11,INTS12,BORCS7,TUBA1C,ABI3,CENPC,CEPT1,PPP1CA,MED30,…
TF	Factor: Erm; motif: NNSCGGAWGYN	TF:M11424	2.05074e-08	7.68809	8225	114	83	19917	PSMB1,PSMB3,EMC7,COMMD6,NUMA1,SRGAP2,VTI1A,SMARCC2,ZBTB8OS,PSMA2,PPM1B,GOSR2,HNRNPK,CNOT9,COMMD5,SCAF11,LSM7,NCBP3,FUBP3,MED11,PTRHD1,ARHGEF6,PSMA6,IRF3,COPS6,PSMA4,COMMD10,NAA20,MIEN1,PSMA7,KRTCAP2,NOP10,NSMCE1,PSMD9,LSM5,MRPS10,SEC13,RPL11,WDR48,UBE2V2,NUTF2,MRPL34,WASHC4,NEDD1,PLEKHA2,KIAA2013,PFDN6,HPS3,ELP6,CNOT11,BORCS7,ABI3,CENPC,CEPT1,PPP1CA,MED30,VMA21,KCMF1,PIH1D1,NFKB1,HSPA6,VBP1,SNX6,…
TF	Factor: c-Ets-2; motif: NCCGGAAGTG	TF:M08759	7.31119e-08	7.13601	8396	114	83	19917	PSMB1,PSMB3,EMC7,NUMA1,SRGAP2,VTI1A,SMARCC2,ZBTB8OS,PPM1B,GOSR2,HNRNPK,CNOT9,COMMD5,SCAF11,NCBP3,FUBP3,MED11,PTRHD1,ARHGEF6,PSMA6,COPS6,PSMA4,COMMD10,NAA20,MIEN1,PSMA7,KRTCAP2,NOP10,NSMCE1,PSMD9,LSM5,MRPS24,PSMA3,MRPS10,SEC13,RPL11,WDR48,UBE2V2,NUTF2,MRPL34,WASHC4,NEDD1,PLEKHA2,KIAA2013,PFDN6,HPS3,ELP6,CNOT11,BORCS7,ABI3,CENPC,CEPT1,PPP1CA,MED30,VMA21,KCMF1,PIH1D1,UPF2,NFKB1,HSPA6,VBP1,SNX6,RPL37…
TF	Factor: FLI-1; motif: NAYTTCCGGT	TF:M08913	7.58332e-08	7.12014	8401	114	83	19917	PSMB1,PSMB3,EMC7,NUMA1,SRGAP2,VTI1A,SMARCC2,ZBTB8OS,SEC61G,PPM1B,GOSR2,HNRNPK,CNOT9,COMMD5,SCAF11,NCBP3,FUBP3,MED11,PTRHD1,ACAP1,PSMA6,IRF3,COPS6,COMMD10,NAA20,MIEN1,PSMA7,KRTCAP2,NOP10,NSMCE1,PSMD9,LSM5,MRPS24,PSMA3,MRPS10,SEC13,RPL11,WDR48,UBE2V2,NUTF2,MRPL34,WASHC4,NEDD1,KIAA2013,PFDN6,HPS3,ELP6,CNOT11,INTS12,BORCS7,TUBA1C,CENPC,CEPT1,PPP1CA,MED30,VMA21,KCMF1,PIH1D1,HSPA6,VBP1,SNX6,ITSN2,RPL37…
TF	Factor: ERG; motif: ACCGGAART	TF:M01752	9.9993e-08	7.00003	9560	114	89	19917	PSMB1,PSMB3,EMC7,COMMD6,NUMA1,SRGAP2,VTI1A,SMARCC2,ZBTB8OS,SEC61G,PPM1B,GOSR2,HNRNPK,CNOT9,COMMD5,SCAF11,NCBP3,FUBP3,MED11,PTRHD1,ARHGEF6,ACAP1,PSMA6,IRF3,COPS6,PSMA4,COMMD10,NAA20,MIEN1,PSMA7,KRTCAP2,NOP10,NSMCE1,PSMD9,LSM5,MRPS24,PSMA3,MRPS10,SEC13,RPL11,WDR48,UBE2V2,NUTF2,MRPL34,WASHC4,NEDD1,KIAA2013,PFDN6,HPS3,ELP6,CNOT11,INTS12,BORCS7,ABI3,CENPC,CEPT1,PPP1CA,MED30,VMA21,KCMF1,PIH1D1,MKRN2,NF…
TF	Factor: nerf; motif: NRRNSCGGAAGNRNNNN	TF:M09606	1.45702e-07	6.83654	6310	114	70	19917	PSMB1,PSMB3,PSMB2,GUK1,EMC7,COMMD6,NUMA1,VTI1A,SMARCC2,ZBTB8OS,GOSR2,CNOT9,COMMD5,SCAF11,LSM7,NCBP3,FUBP3,MED11,PTRHD1,IRF3,PSMA4,COMMD10,NAA20,MIEN1,PSMA7,NOP10,NSMCE1,PSMD9,LSM5,SEC13,WDR48,UBE2V2,MRPL34,WASHC4,NEDD1,KIAA2013,PFDN6,HPS3,ELP6,CNOT11,BORCS7,ABI3,CENPC,PPP1CA,MED30,VMA21,KCMF1,PIH1D1,UPF2,HSPA6,RPL37A,ZC3H13,COMMD1,NDUFAF3,ZNF143,GTF2A1,SRSF7,PSMD4,EIF3G,NAA10,PCF11,TSEN34,MED17,R…
TF	Factor: PEA3; motif: RCCGGAAGYN	TF:M02066	1.59221e-07	6.798	7124	114	75	19917	PSMB1,PSMB3,EMC7,COMMD6,NUMA1,SRGAP2,VTI1A,SMARCC2,ZBTB8OS,SEC61G,GOSR2,HNRNPK,CNOT9,COMMD5,SCAF11,NCBP3,FUBP3,MED11,PTRHD1,ACAP1,PSMA6,IRF3,COPS6,COMMD10,NAA20,MIEN1,PSMA7,KRTCAP2,NOP10,NSMCE1,PSMD9,LSM5,MRPS24,MRPS10,SEC13,RPL11,WDR48,UBE2V2,NUTF2,MRPL34,WASHC4,NEDD1,KIAA2013,PFDN6,HPS3,ELP6,CNOT11,BORCS7,CENPC,CEPT1,PPP1CA,MED30,VMA21,KCMF1,PIH1D1,HSPA6,SNX6,RPL37A,ZC3H13,TUBB8,COMMD1,NDUFAF3,…
TF	Factor: ZF5; motif: GGSGCGCGS; match class: 1	TF:M10438_1	1.95251e-07	6.70941	15001	114	111	19917	PSMB1,PSMB3,PSMB2,GUK1,EMC7,PSMA1,COMMD6,NUMA1,SRGAP2,VTI1A,SMARCC2,ZBTB8OS,SEC61G,PSMA2,PPM1B,GOSR2,HNRNPK,CNOT9,COMMD5,SCAF11,CLEC16A,PFDN1,LSM7,NCBP3,FUBP3,MED11,PTRHD1,ANAPC10,ACAP1,PSMA6,NUDT16,IRF3,COPS6,PSMA4,COMMD10,NAA20,MIEN1,PSMA7,COMMD7,KRTCAP2,NOP10,NSMCE1,PSMD9,LSM5,MRPS24,PSMA3,MRPS10,SEC13,RPL11,WDR48,UBE2V2,NUTF2,MRPL34,WASHC4,NEDD1,PLEKHA2,KIAA2013,PFDN6,HPS3,ELP6,CNOT11,INTS12,…
TF	Factor: PEA3; motif: NACCGGAAGTN	TF:M11425	2.16999e-07	6.66354	7499	114	77	19917	PSMB1,PSMB3,EMC7,COMMD6,NUMA1,SRGAP2,VTI1A,SMARCC2,ZBTB8OS,GOSR2,HNRNPK,CNOT9,COMMD5,SCAF11,LSM7,NCBP3,FUBP3,MED11,PTRHD1,ARHGEF6,ACAP1,PSMA6,COPS6,COMMD10,NAA20,MIEN1,PSMA7,KRTCAP2,NOP10,NSMCE1,PSMD9,LSM5,MRPS10,SEC13,RPL11,WDR48,UBE2V2,MRPL34,WASHC4,NEDD1,KIAA2013,PFDN6,HPS3,ELP6,CNOT11,BORCS7,CENPC,CEPT1,PPP1CA,MED30,VMA21,KCMF1,PIH1D1,UPF2,NFKB1,HSPA6,VBP1,SNX6,RPL37A,ZC3H13,TUBB8,COMMD1,NDUF…
TF	Factor: ELK-1; motif: ACCGGAAGTN	TF:M02059	2.73639e-07	6.56282	9512	114	88	19917	PSMB1,PSMB3,EMC7,COMMD6,NUMA1,SRGAP2,VTI1A,SMARCC2,ZBTB8OS,SEC61G,PPM1B,GOSR2,HNRNPK,CNOT9,COMMD5,SCAF11,PFDN1,NCBP3,FUBP3,MED11,PTRHD1,ACAP1,PSMA6,IRF3,COPS6,PSMA4,COMMD10,NAA20,MIEN1,PSMA7,KRTCAP2,NOP10,NSMCE1,PSMD9,LSM5,MRPS24,PSMA3,MRPS10,SEC13,RPL11,WDR48,UBE2V2,NUTF2,MRPL34,WASHC4,NEDD1,KIAA2013,PFDN6,HPS3,ELP6,CNOT11,INTS12,BORCS7,ABI3,CENPC,CEPT1,PPP1CA,MED30,VMA21,KCMF1,PIH1D1,MKRN2,HSPA…
TF	Factor: Elf-1; motif: ACTTCCGGG	TF:M04714	2.80935e-07	6.55139	7876	114	79	19917	PSMB1,PSMB3,EMC7,NUMA1,SRGAP2,VTI1A,SMARCC2,ZBTB8OS,PPM1B,GOSR2,HNRNPK,CNOT9,COMMD5,SCAF11,NCBP3,FUBP3,MED11,PTRHD1,PSMA6,COPS6,PSMA4,COMMD10,NAA20,MIEN1,PSMA7,KRTCAP2,NOP10,NSMCE1,PSMD9,LSM5,MRPS24,PSMA3,MRPS10,SEC13,RPL11,WDR48,UBE2V2,NUTF2,MRPL34,WASHC4,NEDD1,KIAA2013,PFDN6,HPS3,ELP6,CNOT11,BORCS7,ABI3,CENPC,CEPT1,PPP1CA,MED30,VMA21,KCMF1,PIH1D1,HSPA6,VBP1,SNX6,ITSN2,RPL37A,ZC3H13,TUBB8,COMMD1…
TF	Factor: Elk-1; motif: RCCGGAAGTGN	TF:M09904	3.08895e-07	6.51019	8239	114	81	19917	PSMB1,PSMB3,EMC7,NUMA1,SRGAP2,VTI1A,SMARCC2,ZBTB8OS,PPM1B,GOSR2,HNRNPK,CNOT9,COMMD5,SCAF11,NCBP3,FUBP3,MED11,PTRHD1,PSMA6,COPS6,PSMA4,COMMD10,NAA20,MIEN1,PSMA7,KRTCAP2,NOP10,NSMCE1,PSMD9,LSM5,PSMA3,MRPS10,SEC13,RPL11,WDR48,UBE2V2,NUTF2,MRPL34,WASHC4,NEDD1,KIAA2013,PFDN6,HPS3,ELP6,CNOT11,BORCS7,TUBA1C,ABI3,CENPC,CEPT1,PPP1CA,MED30,VMA21,KCMF1,PIH1D1,UPF2,NFKB1,HSPA6,VBP1,SNX6,RPL37A,ZC3H13,TUBB8,C…
TF	Factor: Elf-1; motif: NANSCGGAAGTR	TF:M11450	3.10979e-07	6.50727	5640	114	65	19917	PSMB1,PSMB3,EMC7,PSMA1,COMMD6,VTI1A,SMARCC2,ZBTB8OS,GOSR2,COMMD5,LSM7,FUBP3,MED11,PTRHD1,PSMA6,IRF3,PSMA4,COMMD10,NAA20,MIEN1,PSMA7,NOP10,NSMCE1,PSMD9,LSM5,PSMA3,SEC13,WDR48,UBE2V2,NUTF2,MRPL34,WASHC4,NEDD1,PFDN6,HPS3,CNOT11,BORCS7,ABI3,CENPC,PPP1CA,MED30,VMA21,PIH1D1,NFKB1,HSPA6,RPL37A,ZC3H13,COMMD1,NDUFAF3,ELOC,ZNF143,GTF2A1,SRSF7,PSMD4,EIF3G,NAA10,PCF11,MED17,RABEPK,CBFB,CHMP4B,ARPC5L,LSM4,ARI…
TF	Factor: nerf; motif: NNNCCGGAAGTGN	TF:M09901	5.28321e-07	6.2771	5408	114	63	19917	PSMB1,PSMB3,EMC7,NUMA1,VTI1A,SMARCC2,ZBTB8OS,GOSR2,CNOT9,COMMD5,NCBP3,FUBP3,MED11,PTRHD1,PSMA6,COMMD10,NAA20,MIEN1,PSMA7,NOP10,NSMCE1,PSMD9,LSM5,MRPS10,SEC13,WDR48,UBE2V2,MRPL34,WASHC4,NEDD1,KIAA2013,PFDN6,HPS3,ELP6,CNOT11,BORCS7,CENPC,CEPT1,PPP1CA,MED30,VMA21,KCMF1,PIH1D1,HSPA6,VBP1,RPL37A,ZC3H13,TUBB8,COMMD1,NDUFAF3,ZNF143,GTF2A1,EIF3G,NAA10,PCF11,TSEN34,MED17,RABEPK,CHMP4B,ARPC5L,LSM4,MRPS18B,…
TF	Factor: Erg; motif: NACCGGAARTN	TF:M11396	7.31987e-07	6.1355	10863	114	94	19917	PSMB1,PSMB3,EMC7,COMMD6,NUMA1,SRGAP2,VTI1A,SMARCC2,ZBTB8OS,SEC61G,PPM1B,GOSR2,HNRNPK,CNOT9,COMMD5,SCAF11,CLEC16A,NCBP3,FUBP3,MED11,PTRHD1,ARHGEF6,ACAP1,PSMA6,IRF3,COPS6,COMMD10,NAA20,MIEN1,PSMA7,KRTCAP2,NOP10,NSMCE1,PSMD9,LSM5,MRPS24,MRPS10,SEC13,RPL11,WDR48,UBE2V2,NUTF2,MRPL34,WASHC4,NEDD1,PLEKHA2,KIAA2013,PFDN6,HPS3,ELP6,CNOT11,INTS12,BORCS7,TUBA1C,CENPC,CEPT1,PPP1CA,MED30,VMA21,KCMF1,PIH1D1,TR…
TF	Factor: c-ets-1; motif: ACCGGAWGTN	TF:M02063	8.45135e-07	6.07307	7686	114	77	19917	PSMB1,PSMB3,EMC7,COMMD6,NUMA1,SRGAP2,VTI1A,SMARCC2,ZBTB8OS,PPM1B,GOSR2,HNRNPK,CNOT9,COMMD5,SCAF11,NCBP3,FUBP3,MED11,PTRHD1,ARHGEF6,ACAP1,PSMA6,COPS6,PSMA4,COMMD10,NAA20,MIEN1,PSMA7,KRTCAP2,NOP10,NSMCE1,PSMD9,LSM5,MRPS24,MRPS10,SEC13,RPL11,WDR48,UBE2V2,NUTF2,MRPL34,WASHC4,NEDD1,PLEKHA2,KIAA2013,PFDN6,HPS3,ELP6,CNOT11,BORCS7,CEPT1,PPP1CA,MED30,VMA21,KCMF1,PIH1D1,MKRN2,NFKB1,SNX6,RPL37A,ZC3H13,TUBB8…
TF	Factor: PEA3; motif: NACCGGAAGTN	TF:M11427	9.14957e-07	6.0386	10689	114	93	19917	PSMB1,PSMB3,GUK1,EMC7,COMMD6,NUMA1,SRGAP2,VTI1A,SMARCC2,ZBTB8OS,SEC61G,PPM1B,GOSR2,HNRNPK,CNOT9,COMMD5,SCAF11,NCBP3,FUBP3,MED11,PTRHD1,ARHGEF6,ACAP1,PSMA6,COPS6,PSMA4,COMMD10,NAA20,MIEN1,PSMA7,COMMD7,KRTCAP2,NOP10,NSMCE1,PSMD9,LSM5,MRPS24,PSMA3,MRPS10,SEC13,RPL11,WDR48,UBE2V2,NUTF2,MRPL34,WASHC4,NEDD1,PLEKHA2,KIAA2013,PFDN6,HPS3,ELP6,CNOT11,BORCS7,TUBA1C,ABI3,CENPC,CEPT1,PPP1CA,MED30,VMA21,KCMF1,…
TF	Factor: Elk-1; motif: NNCCGGAAGTN	TF:M11435	1.47568e-06	5.83101	11838	114	98	19917	PSMB1,PSMB3,PSMB2,GUK1,EMC7,COMMD6,NUMA1,SRGAP2,VTI1A,SMARCC2,ZBTB8OS,SEC61G,PSMA2,PPM1B,GOSR2,HNRNPK,CNOT9,COMMD5,SCAF11,PFDN1,LSM7,NCBP3,FUBP3,MED11,PTRHD1,ARHGEF6,ACAP1,PSMA6,IRF3,COPS6,PSMA4,COMMD10,NAA20,MIEN1,PSMA7,KRTCAP2,NOP10,NSMCE1,PSMD9,LSM5,MRPS24,PSMA3,MRPS10,SEC13,RPL11,WDR48,UBE2V2,NUTF2,MRPL34,WASHC4,NEDD1,PLEKHA2,KIAA2013,PFDN6,HPS3,ELP6,CNOT11,BORCS7,TUBA1C,ABI3,CENPC,CEPT1,PPP1…
TF	Factor: PEA3; motif: NACCGGAAGTN	TF:M11428	1.47659e-06	5.83074	7260	114	74	19917	PSMB1,PSMB3,EMC7,COMMD6,NUMA1,SRGAP2,VTI1A,SMARCC2,ZBTB8OS,PPM1B,GOSR2,HNRNPK,CNOT9,COMMD5,SCAF11,NCBP3,FUBP3,MED11,PTRHD1,ARHGEF6,PSMA6,COPS6,COMMD10,NAA20,MIEN1,PSMA7,KRTCAP2,NOP10,NSMCE1,PSMD9,LSM5,MRPS10,SEC13,RPL11,WDR48,UBE2V2,MRPL34,WASHC4,NEDD1,PLEKHA2,KIAA2013,PFDN6,HPS3,ELP6,CNOT11,CENPC,CEPT1,PPP1CA,MED30,VMA21,KCMF1,PIH1D1,NFKB1,HSPA6,VBP1,SNX6,RPL37A,ZC3H13,TUBB8,COMMD1,NDUFAF3,ELOC,…
TF	Factor: Elk-1; motif: NRCCGGAAGTN	TF:M11433	1.55078e-06	5.80945	7772	114	77	19917	PSMB1,PSMB3,EMC7,PSMA1,COMMD6,NUMA1,SRGAP2,VTI1A,SMARCC2,ZBTB8OS,GOSR2,HNRNPK,CNOT9,COMMD5,SCAF11,NCBP3,FUBP3,MED11,ARHGEF6,PSMA6,IRF3,COPS6,COMMD10,NAA20,MIEN1,KRTCAP2,NOP10,NSMCE1,PSMD9,LSM5,PSMA3,MRPS10,SEC13,RPL11,WDR48,UBE2V2,NUTF2,MRPL34,WASHC4,NEDD1,PLEKHA2,KIAA2013,PFDN6,HPS3,ELP6,TUBA1C,ABI3,CEPT1,PPP1CA,MED30,VMA21,KCMF1,PIH1D1,NFKB1,VBP1,SNX6,ITSN2,RPL37A,ZC3H13,TUBB8,COMMD1,NDUFAF3,EL…
TF	Factor: ER81; motif: RCCGGAARYN	TF:M02065	3.49299e-06	5.4568	12666	114	101	19917	PSMB1,PSMB3,GUK1,EMC7,COMMD6,NUMA1,SRGAP2,VTI1A,SMARCC2,ZBTB8OS,SEC61G,PSMA2,PPM1B,GOSR2,HNRNPK,CNOT9,COMMD5,SCAF11,CLEC16A,LSM7,NCBP3,FUBP3,MED11,PTRHD1,ARHGEF6,ACAP1,PSMA6,IRF3,COPS6,PSMA4,COMMD10,NAA20,MIEN1,PSMA7,KRTCAP2,NOP10,NSMCE1,PSMD9,LSM5,MRPS24,PSMA3,MRPS10,SEC13,RPL11,WDR48,UBE2V2,NUTF2,MRPL34,WASHC4,NEDD1,PLEKHA2,KIAA2013,PFDN6,HPS3,ELP6,CNOT11,INTS12,BORCS7,TUBA1C,ABI3,CENPC,CEPT1,P…
TF	Factor: Elf-1; motif: NNANCCGGAAGTGS	TF:M09900	5.7631e-06	5.23934	5264	114	60	19917	PSMB1,PSMB3,EMC7,NUMA1,VTI1A,SMARCC2,GOSR2,COMMD5,NCBP3,FUBP3,MED11,PTRHD1,PSMA6,PSMA4,COMMD10,NAA20,MIEN1,PSMA7,NOP10,NSMCE1,LSM5,SEC13,WDR48,UBE2V2,MRPL34,WASHC4,NEDD1,KIAA2013,PFDN6,HPS3,ELP6,CNOT11,BORCS7,TUBA1C,CENPC,CEPT1,PPP1CA,MED30,VMA21,KCMF1,PIH1D1,UPF2,NFKB1,HSPA6,RPL37A,ZC3H13,TUBB8,COMMD1,ELOC,ZNF143,EIF3G,NAA10,PCF11,TSEN34,MED17,RABEPK,CHMP4B,ARPC5L,LSM4,MRPS18B
TF	Factor: ER81; motif: NNCCGGAWGYN	TF:M11419	8.49821e-06	5.07067	5760	114	63	19917	PSMB1,PSMB3,EMC7,COMMD6,NUMA1,VTI1A,SMARCC2,ZBTB8OS,PPM1B,GOSR2,HNRNPK,CNOT9,COMMD5,SCAF11,NCBP3,FUBP3,MED11,ARHGEF6,PSMA6,COPS6,COMMD10,NAA20,MIEN1,KRTCAP2,NOP10,NSMCE1,PSMD9,LSM5,MRPS10,SEC13,RPL11,WDR48,UBE2V2,NUTF2,WASHC4,NEDD1,PLEKHA2,PFDN6,HPS3,ELP6,CEPT1,PPP1CA,MED30,VMA21,KCMF1,PIH1D1,NFKB1,SNX6,RPL37A,ZC3H13,TUBB8,COMMD1,NDUFAF3,ELOC,ZNF143,GTF2A1,EIF3G,NAA10,PCF11,TSEN34,MED17,ARPC5L,TN…
TF	Factor: GABP-alpha; motif: NNNRCCGGAAGTGN	TF:M09935	9.03925e-06	5.04387	4467	114	54	19917	PSMB1,PSMB3,EMC7,COMMD6,NUMA1,VTI1A,SMARCC2,ZBTB8OS,GOSR2,COMMD5,NCBP3,FUBP3,MED11,PTRHD1,PSMA6,PSMA4,NAA20,PSMA7,NOP10,NSMCE1,PSMD9,LSM5,SEC13,WDR48,UBE2V2,WASHC4,NEDD1,KIAA2013,PFDN6,HPS3,ELP6,CNOT11,BORCS7,PPP1CA,MED30,VMA21,KCMF1,PIH1D1,RPL37A,ZC3H13,COMMD1,ELOC,ZNF143,GTF2A1,EIF3G,NAA10,PCF11,TSEN34,MED17,RABEPK,ARPC5L,LSM4,MRPS18B,TNPO1
TF	Factor: Elk-1; motif: NRSCGGAAGNN	TF:M11434	1.57158e-05	4.80366	8290	114	78	19917	PSMB1,PSMB3,PSMB2,GUK1,EMC7,COMMD6,NUMA1,SRGAP2,VTI1A,SMARCC2,ZBTB8OS,GOSR2,HNRNPK,CNOT9,COMMD5,SCAF11,NCBP3,FUBP3,MED11,PTRHD1,PSMA6,COPS6,PSMA4,COMMD10,NAA20,MIEN1,PSMA7,KRTCAP2,NOP10,NSMCE1,PSMD9,LSM5,MRPS10,SEC13,RPL11,WDR48,UBE2V2,NUTF2,MRPL34,WASHC4,NEDD1,KIAA2013,PFDN6,HPS3,ELP6,CNOT11,BORCS7,ABI3,CENPC,CEPT1,PPP1CA,MED30,VMA21,KCMF1,PIH1D1,UPF2,MKRN2,HSPA6,SNX6,RPL37A,ZC3H13,TUBB8,COMMD1,…
TF	Factor: Elf-1; motif: NANGCGGAAGTR	TF:M11452	1.79684e-05	4.74549	6324	114	66	19917	PSMB1,PSMB3,EMC7,COMMD6,SRGAP2,VTI1A,SMARCC2,ZBTB8OS,GOSR2,COMMD5,LSM7,FUBP3,MED11,PTRHD1,PSMA6,IRF3,PSMA4,COMMD10,NAA20,MIEN1,PSMA7,NOP10,NSMCE1,PSMD9,LSM5,MRPS24,PSMA3,SEC13,RPL11,WDR48,UBE2V2,NUTF2,MRPL34,WASHC4,NEDD1,PFDN6,HPS3,CNOT11,BORCS7,ABI3,CENPC,PPP1CA,MED30,VMA21,PIH1D1,HSPA6,RPL37A,ZC3H13,TUBB8,COMMD1,NDUFAF3,ELOC,ZNF143,GTF2A1,SRSF7,PSMD4,EIF3G,NAA10,PCF11,MED17,RABEPK,CBFB,CHMP4B,A…
TF	Factor: ETV7; motif: NCCGGAANNN	TF:M02071	2.53632e-05	4.5958	10214	114	88	19917	PSMB1,PSMB3,GUK1,EMC7,COMMD6,NUMA1,SRGAP2,VTI1A,SMARCC2,SEC61G,PPM1B,GOSR2,HNRNPK,CNOT9,COMMD5,SCAF11,CLEC16A,NCBP3,FUBP3,MED11,ACAP1,PSMA6,IRF3,COPS6,COMMD10,NAA20,MIEN1,KRTCAP2,NOP10,NSMCE1,PSMD9,LSM5,MRPS24,PSMA3,MRPS10,SEC13,RPL11,WDR48,UBE2V2,NUTF2,MRPL34,WASHC4,NEDD1,PLEKHA2,KIAA2013,PFDN6,HPS3,ELP6,INTS12,TUBA1C,ABI3,CENPC,CEPT1,PPP1CA,MED30,VMA21,KCMF1,PIH1D1,UPF2,TRA2A,HSPA6,VBP1,SNX6,IT…
TF	Factor: ETV4; motif: ACCGGAAGTN	TF:M03982	3.61538e-05	4.44185	6903	114	69	19917	PSMB1,PSMB3,EMC7,NUMA1,SRGAP2,VTI1A,SMARCC2,ZBTB8OS,GOSR2,HNRNPK,CNOT9,COMMD5,SCAF11,NCBP3,FUBP3,MED11,ARHGEF6,ACAP1,PSMA6,COPS6,COMMD10,NAA20,MIEN1,KRTCAP2,NOP10,NSMCE1,PSMD9,LSM5,MRPS24,MRPS10,SEC13,RPL11,WDR48,UBE2V2,MRPL34,WASHC4,NEDD1,KIAA2013,PFDN6,HPS3,ELP6,CENPC,CEPT1,PPP1CA,MED30,VMA21,KCMF1,PIH1D1,NFKB1,HSPA6,VBP1,SNX6,RPL37A,ZC3H13,TUBB8,COMMD1,NDUFAF3,ELOC,ZNF143,GTF2A1,EIF3G,NAA10,PC…
TF	Factor: GABP-alpha; motif: CACTTCCGG	TF:M04698	5.50864e-05	4.25896	3221	114	43	19917	PSMB1,PSMB3,EMC7,VTI1A,ZBTB8OS,COMMD5,FUBP3,MED11,PTRHD1,PSMA6,PSMA4,NAA20,PSMA7,NOP10,NSMCE1,PSMD9,LSM5,SEC13,WDR48,UBE2V2,NUTF2,WASHC4,NEDD1,PFDN6,HPS3,CNOT11,BORCS7,PPP1CA,MED30,VMA21,PIH1D1,RPL37A,ZC3H13,COMMD1,ELOC,GTF2A1,EIF3G,NAA10,PCF11,MED17,ARPC5L,LSM4,MRPS18B
TF	Factor: Elk-1; motif: NACMGGAAGTN	TF:M11432	6.67682e-05	4.17543	6201	114	64	19917	PSMB1,PSMB3,COMMD6,NUMA1,VTI1A,SMARCC2,ZBTB8OS,GOSR2,HNRNPK,CNOT9,COMMD5,LSM7,NCBP3,FUBP3,MED11,ACAP1,PSMA6,COPS6,COMMD10,NAA20,MIEN1,KRTCAP2,NOP10,NSMCE1,PSMD9,LSM5,MRPS10,SEC13,RPL11,WDR48,UBE2V2,MRPL34,WASHC4,NEDD1,KIAA2013,PFDN6,HPS3,ELP6,CEPT1,PPP1CA,MED30,VMA21,PIH1D1,UPF2,SNX6,ITSN2,RPL37A,ZC3H13,COMMD1,NDUFAF3,ELOC,ZNF143,GTF2A1,EIF3G,NAA10,PCF11,SRXN1,TSEN34,MED17,CHMP4B,ARPC5L,ARID3A,MR…
TF	Factor: ER71; motif: ACCGGAARYN	TF:M02067	0.000140331	3.85285	6001	114	62	19917	PSMB1,PSMB3,EMC7,COMMD6,NUMA1,VTI1A,SMARCC2,ZBTB8OS,GOSR2,HNRNPK,CNOT9,COMMD5,SCAF11,NCBP3,FUBP3,MED11,ACAP1,PSMA6,IRF3,COPS6,NAA20,MIEN1,KRTCAP2,NOP10,NSMCE1,PSMD9,LSM5,MRPS24,MRPS10,SEC13,RPL11,WDR48,UBE2V2,NUTF2,WASHC4,NEDD1,PFDN6,HPS3,INTS12,TUBA1C,CEPT1,PPP1CA,VMA21,KCMF1,PIH1D1,MKRN2,SNX6,RPL37A,ZC3H13,TUBB8,COMMD1,NDUFAF3,ELOC,ZNF143,GTF2A1,EIF3G,NAA10,PCF11,TSEN34,MED17,ARPC5L,TNPO1
TF	Factor: Erm; motif: ACCGGAAGTN	TF:M02069	0.000152124	3.8178	6961	114	68	19917	PSMB1,EMC7,NUMA1,VTI1A,SMARCC2,PPM1B,GOSR2,HNRNPK,CNOT9,COMMD5,SCAF11,NCBP3,FUBP3,MED11,ARHGEF6,ACAP1,PSMA6,COPS6,COMMD10,NAA20,MIEN1,KRTCAP2,NOP10,NSMCE1,PSMD9,LSM5,MRPS24,MRPS10,SEC13,RPL11,WDR48,UBE2V2,MRPL34,WASHC4,NEDD1,PLEKHA2,KIAA2013,PFDN6,HPS3,ELP6,INTS12,CEPT1,PPP1CA,MED30,VMA21,KCMF1,PIH1D1,NFKB1,HSPA6,VBP1,SNX6,ITSN2,ZC3H13,TUBB8,COMMD1,NDUFAF3,ZNF143,GTF2A1,EIF3G,NAA10,PCF11,TSEN34,M…
TF	Factor: ZF5; motif: GGSGCGCGS	TF:M10438	0.000153917	3.81271	16373	114	112	19917	PSMB1,PSMB3,PSMB2,GUK1,EMC7,PSMA1,COMMD6,NUMA1,SRGAP2,VTI1A,SMARCC2,ZBTB8OS,SEC61G,PSMA2,PPM1B,GOSR2,HNRNPK,CNOT9,COMMD5,SCAF11,CLEC16A,PFDN1,LSM7,NCBP3,FUBP3,MED11,PTRHD1,ANAPC10,ACAP1,PSMA6,NUDT16,IRF3,COPS6,PSMA4,COMMD10,NAA20,MIEN1,PSMA7,COMMD7,KRTCAP2,NOP10,NSMCE1,PSMD9,LSM5,MRPS24,PSMA3,MRPS10,SEC13,RPL11,WDR48,UBE2V2,NUTF2,MRPL34,WASHC4,NEDD1,PLEKHA2,KIAA2013,PFDN6,HPS3,ELP6,CNOT11,INTS12,…
TF	Factor: p300; motif: ACNTCCG; match class: 1	TF:M04826_1	0.000175599	3.75548	15413	114	109	19917	PSMB1,PSMB3,PSMB2,GUK1,EMC7,PSMA1,COMMD6,NUMA1,SRGAP2,VTI1A,SMARCC2,ZBTB8OS,SEC61G,PSMA2,PPM1B,GOSR2,HNRNPK,CNOT9,COMMD5,SCAF11,CLEC16A,LSM7,NCBP3,FUBP3,MED11,PTRHD1,ANAPC10,ARHGEF6,ACAP1,PSMA6,NUDT16,IRF3,COPS6,PSMA4,COMMD10,NAA20,MIEN1,PSMA7,COMMD7,KRTCAP2,NOP10,NSMCE1,PSMD9,MRPS24,PSMA3,MRPS10,SEC13,WDR48,UBE2V2,NUTF2,MRPL34,WASHC4,NEDD1,PLEKHA2,KIAA2013,PFDN6,HPS3,ELP6,CNOT11,INTS12,BORCS7,TU…
TF	Factor: Elk-1:HOXA1; motif: ACCGGAAGTAATTA	TF:M08451	0.000187581	3.72681	8515	114	77	19917	PSMB1,PSMB3,GUK1,EMC7,PSMA1,COMMD6,NUMA1,SRGAP2,VTI1A,SMARCC2,ZBTB8OS,GOSR2,HNRNPK,CNOT9,COMMD5,SCAF11,PFDN1,LSM7,FUBP3,MED11,PTRHD1,PSMA6,IRF3,COPS6,PSMA4,COMMD10,NAA20,MIEN1,KRTCAP2,NOP10,NSMCE1,PSMD9,LSM5,PSMA3,MRPS10,SEC13,WDR48,UBE2V2,NUTF2,MRPL34,WASHC4,NEDD1,PLEKHA2,PFDN6,HPS3,CNOT11,BORCS7,ABI3,PPP1CA,MED30,VMA21,KCMF1,PIH1D1,VBP1,CCDC93,SNX6,ITSN2,RPL37A,ZC3H13,TUBB8,COMMD1,NDUFAF3,ELOC,…
TF	Factor: IRX-1; motif: NACRYNNNNNNNNRYGNN; match class: 1	TF:M11018_1	0.000218199	3.66115	16079	114	111	19917	PSMB1,PSMB3,PSMB2,GUK1,EMC7,COMMD6,NUMA1,SRGAP2,VTI1A,SMARCC2,ZBTB8OS,SEC61G,PSMA2,PPM1B,GOSR2,HNRNPK,CNOT9,COMMD5,SCAF11,CLEC16A,PFDN1,LSM7,NCBP3,FUBP3,MED11,PTRHD1,ANAPC10,PSMA6,NUDT16,IRF3,COPS6,PSMA4,COMMD10,NAA20,MIEN1,PSMA7,COMMD7,KRTCAP2,NOP10,NSMCE1,PSMD9,LSM5,MRPS24,PSMA3,MRPS10,SEC13,RPL11,WDR48,UBE2V2,NUTF2,MRPL34,WASHC4,NEDD1,PLEKHA2,KIAA2013,PFDN6,HPS3,ELP6,CNOT11,INTS12,BORCS7,TUBA1…
TF	Factor: EHF; motif: CSCGGAARTN	TF:M02052	0.000225	3.64782	10199	114	86	19917	PSMB1,PSMB3,GUK1,EMC7,COMMD6,NUMA1,SRGAP2,VTI1A,SMARCC2,ZBTB8OS,PSMA2,GOSR2,HNRNPK,CNOT9,COMMD5,SCAF11,LSM7,NCBP3,FUBP3,MED11,PTRHD1,PSMA6,IRF3,COPS6,PSMA4,COMMD10,NAA20,MIEN1,PSMA7,KRTCAP2,NOP10,NSMCE1,PSMD9,LSM5,MRPS24,PSMA3,MRPS10,SEC13,RPL11,WDR48,UBE2V2,NUTF2,MRPL34,WASHC4,NEDD1,PLEKHA2,KIAA2013,PFDN6,HPS3,CNOT11,BORCS7,TUBA1C,ABI3,CEPT1,PPP1CA,MED30,VMA21,KCMF1,PIH1D1,UPF2,NFKB1,HSPA6,VBP1,…
TF	Factor: ETS1; motif: ACCGGAARYN	TF:M03977	0.000258864	3.58693	10612	114	88	19917	PSMB1,PSMB3,EMC7,COMMD6,NUMA1,SRGAP2,VTI1A,SMARCC2,ZBTB8OS,SEC61G,PPM1B,GOSR2,HNRNPK,CNOT9,COMMD5,SCAF11,CLEC16A,NCBP3,FUBP3,MED11,ARHGEF6,ACAP1,PSMA6,IRF3,COPS6,COMMD10,NAA20,MIEN1,KRTCAP2,NOP10,NSMCE1,PSMD9,LSM5,MRPS24,PSMA3,MRPS10,SEC13,RPL11,WDR48,UBE2V2,NUTF2,MRPL34,WASHC4,NEDD1,PLEKHA2,KIAA2013,PFDN6,HPS3,ELP6,INTS12,TUBA1C,CENPC,CEPT1,PPP1CA,MED30,VMA21,KCMF1,PIH1D1,TRA2A,NFKB1,HSPA6,VBP1,…
TF	Factor: GABP-alpha; motif: CTTCCK	TF:M01660	0.000268057	3.57177	11217	114	91	19917	PSMB1,PSMB3,PSMB2,GUK1,EMC7,PSMA1,COMMD6,NUMA1,SRGAP2,VTI1A,SMARCC2,ZBTB8OS,PSMA2,PPM1B,GOSR2,HNRNPK,CNOT9,COMMD5,SCAF11,PFDN1,LSM7,NCBP3,FUBP3,MED11,PTRHD1,PSMA6,IRF3,COPS6,PSMA4,COMMD10,NAA20,MIEN1,PSMA7,KRTCAP2,NOP10,NSMCE1,PSMD9,LSM5,PSMA3,MRPS10,SEC13,RPL11,WDR48,UBE2V2,NUTF2,MRPL34,WASHC4,NEDD1,KIAA2013,PFDN6,HPS3,ELP6,CNOT11,BORCS7,TUBA1C,ABI3,CENPC,CEPT1,PPP1CA,MED30,VMA21,KCMF1,PIH1D1,UP…
TF	Factor: Fli-1; motif: NACCGGAARTN	TF:M11400	0.000272904	3.56399	10042	114	85	19917	PSMB1,PSMB3,EMC7,NUMA1,SRGAP2,VTI1A,SMARCC2,ZBTB8OS,SEC61G,PPM1B,GOSR2,HNRNPK,CNOT9,COMMD5,SCAF11,CLEC16A,NCBP3,FUBP3,MED11,ARHGEF6,ACAP1,PSMA6,IRF3,COPS6,COMMD10,NAA20,MIEN1,KRTCAP2,NOP10,NSMCE1,PSMD9,LSM5,MRPS24,MRPS10,SEC13,RPL11,WDR48,UBE2V2,NUTF2,MRPL34,WASHC4,NEDD1,PLEKHA2,KIAA2013,PFDN6,HPS3,ELP6,INTS12,TUBA1C,CENPC,CEPT1,PPP1CA,MED30,VMA21,KCMF1,PIH1D1,TRA2A,NFKB1,HSPA6,VBP1,SNX6,ITSN2,RP…
TF	Factor: ELF4; motif: NCCGGAARTN	TF:M02056	0.000349109	3.45704	5379	114	57	19917	PSMB1,PSMB3,EMC7,VTI1A,ZBTB8OS,PPM1B,GOSR2,COMMD5,NCBP3,FUBP3,MED11,PTRHD1,ACAP1,PSMA6,IRF3,PSMA4,COMMD10,NAA20,PSMA7,NOP10,NSMCE1,LSM5,MRPS24,SEC13,RPL11,WDR48,UBE2V2,WASHC4,NEDD1,PFDN6,HPS3,CNOT11,BORCS7,TUBA1C,CEPT1,PPP1CA,MED30,VMA21,PIH1D1,HSPA6,ITSN2,RPL37A,ZC3H13,COMMD1,NDUFAF3,ELOC,ZNF143,GTF2A1,EIF3G,NAA10,PCF11,MED17,CBFB,ARPC5L,CNOT7,LSM4,MRPS18B
TF	Factor: Fli-1; motif: NACCGGAARTN	TF:M11404	0.000414703	3.38226	8828	114	78	19917	PSMB1,PSMB3,EMC7,NUMA1,SRGAP2,VTI1A,SMARCC2,ZBTB8OS,SEC61G,PPM1B,GOSR2,HNRNPK,CNOT9,COMMD5,SCAF11,NCBP3,FUBP3,MED11,ARHGEF6,ACAP1,PSMA6,IRF3,COPS6,COMMD10,NAA20,MIEN1,KRTCAP2,NOP10,NSMCE1,PSMD9,LSM5,MRPS24,MRPS10,SEC13,RPL11,WDR48,UBE2V2,MRPL34,WASHC4,NEDD1,KIAA2013,PFDN6,HPS3,ELP6,INTS12,TUBA1C,CENPC,CEPT1,PPP1CA,MED30,VMA21,KCMF1,PIH1D1,NFKB1,HSPA6,VBP1,SNX6,ITSN2,RPL37A,ZC3H13,TUBB8,COMMD1,NDU…
TF	Factor: Erg; motif: ACCGGAAGTN	TF:M02062	0.000453306	3.34361	8143	114	74	19917	PSMB1,PSMB3,EMC7,COMMD6,NUMA1,SRGAP2,VTI1A,SMARCC2,ZBTB8OS,SEC61G,GOSR2,HNRNPK,CNOT9,COMMD5,SCAF11,NCBP3,FUBP3,MED11,ACAP1,PSMA6,IRF3,COPS6,COMMD10,NAA20,MIEN1,KRTCAP2,NOP10,NSMCE1,PSMD9,LSM5,MRPS24,MRPS10,SEC13,RPL11,WDR48,UBE2V2,NUTF2,MRPL34,WASHC4,NEDD1,KIAA2013,PFDN6,HPS3,ELP6,INTS12,CENPC,CEPT1,PPP1CA,MED30,VMA21,KCMF1,PIH1D1,MKRN2,HSPA6,VBP1,SNX6,RPL37A,ZC3H13,TUBB8,COMMD1,NDUFAF3,ELOC,ZNF1…
TF	Factor: Erm; motif: NRCMGGAAGTN	TF:M11422	0.000533825	3.2726	4711	114	52	19917	PSMB1,PSMB3,COMMD6,VTI1A,SMARCC2,ZBTB8OS,GOSR2,HNRNPK,CNOT9,COMMD5,LSM7,NCBP3,FUBP3,MED11,ACAP1,PSMA6,NAA20,NOP10,NSMCE1,PSMD9,LSM5,SEC13,RPL11,WDR48,UBE2V2,WASHC4,NEDD1,PFDN6,HPS3,ELP6,TUBA1C,PPP1CA,MED30,VMA21,PIH1D1,UPF2,NFKB1,RPL37A,ZC3H13,COMMD1,NDUFAF3,ELOC,ZNF143,GTF2A1,EIF3G,NAA10,PCF11,SRXN1,TSEN34,MED17,ARPC5L,MRPS18B
TF	Factor: FLI1; motif: ACCGGAARTN	TF:M03988	0.00073945	3.13109	8401	114	75	19917	PSMB1,PSMB3,EMC7,NUMA1,SRGAP2,VTI1A,SMARCC2,ZBTB8OS,SEC61G,PPM1B,GOSR2,HNRNPK,CNOT9,COMMD5,SCAF11,NCBP3,FUBP3,MED11,ACAP1,PSMA6,IRF3,COPS6,COMMD10,NAA20,MIEN1,KRTCAP2,NOP10,NSMCE1,PSMD9,LSM5,MRPS24,MRPS10,SEC13,RPL11,WDR48,UBE2V2,MRPL34,WASHC4,NEDD1,KIAA2013,PFDN6,HPS3,ELP6,INTS12,TUBA1C,CENPC,CEPT1,PPP1CA,MED30,VMA21,KCMF1,PIH1D1,HSPA6,SNX6,ITSN2,RPL37A,ZC3H13,TUBB8,COMMD1,NDUFAF3,ELOC,ZNF143,GT…
TF	Factor: SAP-1; motif: ACCGGAAGTNN	TF:M09607	0.000766604	3.11543	4762	114	52	19917	PSMB1,PSMB3,EMC7,COMMD6,SRGAP2,VTI1A,ZBTB8OS,COMMD5,FUBP3,MED11,PTRHD1,PSMA6,PSMA4,COMMD10,NAA20,PSMA7,NOP10,NSMCE1,PSMD9,LSM5,PSMA3,SEC13,WDR48,UBE2V2,NUTF2,WASHC4,NEDD1,PFDN6,HPS3,CNOT11,BORCS7,ABI3,PPP1CA,MED30,VMA21,PIH1D1,UPF2,RPL37A,ZC3H13,COMMD1,NDUFAF3,ELOC,GTF2A1,EIF3G,NAA10,PCF11,SRXN1,TSEN34,MED17,ARPC5L,LSM4,MRPS18B
TF	Factor: c-ets-2; motif: ACCGGAWRTN; match class: 1	TF:M02064_1	0.000805221	3.09409	4626	114	51	19917	PSMB1,GUK1,COMMD6,SRGAP2,VTI1A,ZBTB8OS,SEC61G,PPM1B,GOSR2,HNRNPK,COMMD5,NCBP3,FUBP3,ARHGEF6,PSMA6,COPS6,COMMD10,NAA20,KRTCAP2,LSM5,MRPS10,UBE2V2,NUTF2,MRPL34,NEDD1,PFDN6,HPS3,ELP6,TUBA1C,CEPT1,PPP1CA,MED30,VMA21,KCMF1,PIH1D1,MKRN2,NFKB1,ITSN2,ZC3H13,COMMD1,NDUFAF3,ELOC,ZNF143,GTF2A1,EIF3G,NAA10,PCF11,TSEN34,MED17,ARPC5L,CNOT7
TF	Factor: Elf-1; motif: NAANCMGGAAGTGN	TF:M09605	0.000970349	3.01307	5835	114	59	19917	PSMB1,PSMB3,EMC7,NUMA1,VTI1A,SMARCC2,GOSR2,COMMD5,SCAF11,NCBP3,FUBP3,MED11,PTRHD1,PSMA6,COPS6,COMMD10,NAA20,MIEN1,NOP10,NSMCE1,PSMD9,LSM5,MRPS10,SEC13,WDR48,UBE2V2,MRPL34,WASHC4,NEDD1,KIAA2013,PFDN6,HPS3,ELP6,TUBA1C,CENPC,CEPT1,PPP1CA,MED30,VMA21,KCMF1,PIH1D1,UPF2,NFKB1,HSPA6,ZC3H13,TUBB8,COMMD1,NDUFAF3,ZNF143,GTF2A1,EIF3G,NAA10,PCF11,TSEN34,MED17,RABEPK,CHMP4B,ARPC5L,TNPO1
TF	Factor: ER81; motif: RCCGGAARYN; match class: 1	TF:M02065_1	0.00111093	2.95431	6798	114	65	19917	PSMB1,GUK1,EMC7,COMMD6,NUMA1,SRGAP2,VTI1A,ZBTB8OS,SEC61G,PSMA2,GOSR2,CNOT9,COMMD5,NCBP3,FUBP3,PSMA6,IRF3,COPS6,PSMA4,COMMD10,NAA20,NOP10,PSMD9,LSM5,MRPS24,PSMA3,RPL11,WDR48,UBE2V2,NUTF2,NEDD1,PFDN6,HPS3,BORCS7,TUBA1C,ABI3,CEPT1,PPP1CA,MED30,VMA21,KCMF1,PIH1D1,HSPA6,ITSN2,RPL37A,ZC3H13,COMMD1,NDUFAF3,ELOC,ZNF143,GTF2A1,PSMD4,EIF3G,NAA10,PCF11,LSM14A,TSEN34,MED17,CBFB,CHMP4B,ARPC5L,CNOT7,LSM4,MRPS1…
TF	Factor: ELF1; motif: AACCCGGAAGTR	TF:M03966	0.00128509	2.89107	6662	114	64	19917	PSMB1,PSMB3,EMC7,VTI1A,SMARCC2,ZBTB8OS,PSMA2,PPM1B,GOSR2,COMMD5,LSM7,FUBP3,MED11,PTRHD1,ARHGEF6,ACAP1,PSMA6,IRF3,PSMA4,COMMD10,NAA20,MIEN1,KRTCAP2,NOP10,NSMCE1,PSMD9,LSM5,PSMA3,MRPS10,SEC13,WDR48,UBE2V2,NUTF2,WASHC4,NEDD1,PFDN6,HPS3,CNOT11,BORCS7,TUBA1C,ABI3,CENPC,PPP1CA,VMA21,PIH1D1,NFKB1,HSPA6,VBP1,ZC3H13,TUBB8,COMMD1,ELOC,ZNF143,GTF2A1,EIF3G,NAA10,PCF11,MED17,RABEPK,CBFB,CHMP4B,ARPC5L,LSM4,MRP…
TF	Factor: Elf-1; motif: NANGCGGAAGTN	TF:M11448	0.00138563	2.85835	7657	114	70	19917	PSMB1,PSMB3,PSMB2,GUK1,EMC7,COMMD6,NUMA1,SRGAP2,VTI1A,SMARCC2,ZBTB8OS,PSMA2,GOSR2,COMMD5,LSM7,FUBP3,MED11,PTRHD1,PSMA6,IRF3,PSMA4,COMMD10,NAA20,MIEN1,PSMA7,NOP10,NSMCE1,PSMD9,LSM5,PSMA3,SEC13,RPL11,WDR48,UBE2V2,NUTF2,MRPL34,WASHC4,NEDD1,PFDN6,HPS3,CNOT11,BORCS7,ABI3,CENPC,PPP1CA,MED30,VMA21,PIH1D1,UPF2,HSPA6,RPL37A,ZC3H13,TUBB8,COMMD1,NDUFAF3,ELOC,ZNF143,GTF2A1,SRSF7,PSMD4,EIF3G,NAA10,PCF11,MED17…
TF	Factor: Fli-1; motif: ACCGGAAGYN	TF:M02073	0.00151018	2.82097	5905	114	59	19917	PSMB1,EMC7,NUMA1,SRGAP2,VTI1A,SMARCC2,SEC61G,GOSR2,HNRNPK,CNOT9,COMMD5,SCAF11,NCBP3,FUBP3,MED11,ACAP1,PSMA6,COPS6,COMMD10,NAA20,MIEN1,KRTCAP2,NOP10,NSMCE1,PSMD9,LSM5,MRPS10,SEC13,RPL11,WDR48,UBE2V2,MRPL34,WASHC4,NEDD1,KIAA2013,PFDN6,HPS3,INTS12,CENPC,CEPT1,PPP1CA,VMA21,KCMF1,PIH1D1,VBP1,SNX6,ZC3H13,TUBB8,COMMD1,ZNF143,GTF2A1,EIF3G,NAA10,LSM14A,TSEN34,MED17,CHMP4B,ARPC5L,TNPO1
TF	Factor: TEL1; motif: CNCGGAANNN	TF:M02070	0.00153064	2.81513	10938	114	88	19917	PSMB1,PSMB3,GUK1,EMC7,PSMA1,COMMD6,NUMA1,SRGAP2,VTI1A,ZBTB8OS,PSMA2,PPM1B,CNOT9,COMMD5,SCAF11,CLEC16A,PFDN1,NCBP3,FUBP3,MED11,PTRHD1,ANAPC10,ACAP1,PSMA6,NUDT16,IRF3,PSMA4,COMMD10,NAA20,MIEN1,PSMA7,NOP10,NSMCE1,LSM5,PSMA3,MRPS10,SEC13,RPL11,WDR48,UBE2V2,NUTF2,WASHC4,NEDD1,PLEKHA2,PFDN6,HPS3,ELP6,CNOT11,TUBA1C,ABI3,CEPT1,PPP1CA,MED30,VMA21,KCMF1,PIH1D1,TRA2A,MKRN2,HSPA6,VBP1,ITSN2,RPL37A,ZC3H13,TUB…
TF	Factor: GABP-ALPHA; motif: RCCGGAARTNN	TF:M08917	0.00168586	2.77318	2724	114	36	19917	PSMB1,PSMB3,VTI1A,SMARCC2,ZBTB8OS,GOSR2,COMMD5,NCBP3,FUBP3,MED11,PSMA6,NAA20,NOP10,NSMCE1,PSMD9,LSM5,SEC13,WDR48,UBE2V2,WASHC4,NEDD1,PFDN6,HPS3,PPP1CA,VMA21,PIH1D1,RPL37A,ZC3H13,COMMD1,ELOC,ZNF143,EIF3G,NAA10,PCF11,MED17,ARPC5L
TF	Factor: ERF; motif: ACCGGAARYN	TF:M02061	0.00172482	2.76326	2604	114	35	19917	PSMB1,PSMB3,COMMD6,SRGAP2,VTI1A,SMARCC2,ZBTB8OS,GOSR2,COMMD5,FUBP3,MED11,ACAP1,NAA20,NOP10,NSMCE1,PSMD9,LSM5,SEC13,WDR48,WASHC4,NEDD1,PFDN6,HPS3,VMA21,PIH1D1,RPL37A,ZC3H13,COMMD1,ELOC,ZNF143,EIF3G,NAA10,PCF11,MED17,ARPC5L
TF	Factor: CHD2; motif: TCTCGCGAG; match class: 1	TF:M04710_1	0.00200055	2.69885	11589	114	91	19917	PSMB1,PSMB3,PSMB2,GUK1,EMC7,COMMD6,NUMA1,SRGAP2,VTI1A,SMARCC2,ZBTB8OS,SEC61G,PSMA2,GOSR2,HNRNPK,CNOT9,COMMD5,SCAF11,CLEC16A,LSM7,FUBP3,MED11,PTRHD1,ANAPC10,ARHGEF6,ACAP1,PSMA6,IRF3,COPS6,PSMA4,NAA20,MIEN1,PSMA7,COMMD7,KRTCAP2,NOP10,NSMCE1,PSMD9,LSM5,PSMA3,MRPS10,SEC13,RPL11,UBE2V2,NUTF2,WASHC4,PLEKHA2,KIAA2013,PFDN6,HPS3,ELP6,CNOT11,BORCS7,TUBA1C,CENPC,CEPT1,PPP1CA,MED30,VMA21,KCMF1,PIH1D1,UPF2,T…
TF	Factor: CHD2; motif: TCTCGCGAG	TF:M04710	0.00207681	2.6826	14245	114	103	19917	PSMB1,PSMB3,PSMB2,GUK1,EMC7,COMMD6,NUMA1,SRGAP2,VTI1A,SMARCC2,ZBTB8OS,SEC61G,PSMA2,PPM1B,GOSR2,HNRNPK,CNOT9,COMMD5,SCAF11,CLEC16A,LSM7,NCBP3,FUBP3,MED11,PTRHD1,ANAPC10,ARHGEF6,ACAP1,PSMA6,NUDT16,IRF3,COPS6,PSMA4,COMMD10,NAA20,MIEN1,PSMA7,COMMD7,KRTCAP2,NOP10,NSMCE1,PSMD9,LSM5,MRPS24,PSMA3,MRPS10,SEC13,RPL11,WDR48,UBE2V2,NUTF2,WASHC4,PLEKHA2,KIAA2013,PFDN6,HPS3,ELP6,CNOT11,INTS12,BORCS7,TUBA1C,CEN…
TF	Factor: Erg; motif: NACCGGAARYN	TF:M11392	0.00224861	2.64809	8777	114	76	19917	PSMB1,PSMB3,EMC7,NUMA1,SRGAP2,VTI1A,SMARCC2,ZBTB8OS,SEC61G,GOSR2,HNRNPK,CNOT9,COMMD5,SCAF11,NCBP3,FUBP3,MED11,ACAP1,PSMA6,IRF3,COPS6,COMMD10,NAA20,MIEN1,KRTCAP2,NOP10,NSMCE1,PSMD9,LSM5,MRPS24,MRPS10,SEC13,RPL11,WDR48,UBE2V2,NUTF2,MRPL34,WASHC4,NEDD1,PLEKHA2,KIAA2013,PFDN6,HPS3,ELP6,INTS12,TUBA1C,CENPC,CEPT1,PPP1CA,MED30,VMA21,KCMF1,PIH1D1,TRA2A,HSPA6,VBP1,SNX6,RPL37A,ZC3H13,TUBB8,COMMD1,NDUFAF3,E…
TF	Factor: PEA3; motif: NACCGGAAGTN; match class: 1	TF:M11427_1	0.00247847	2.60582	4645	114	50	19917	PSMB1,EMC7,COMMD6,NUMA1,SRGAP2,VTI1A,ZBTB8OS,PPM1B,GOSR2,COMMD5,NCBP3,FUBP3,PSMA6,PSMA4,COMMD10,NAA20,KRTCAP2,PSMD9,LSM5,WDR48,UBE2V2,NUTF2,NEDD1,PFDN6,HPS3,ELP6,BORCS7,CENPC,CEPT1,PPP1CA,MED30,VMA21,KCMF1,PIH1D1,MKRN2,HSPA6,VBP1,ITSN2,ZC3H13,NDUFAF3,ELOC,ZNF143,GTF2A1,EIF3G,NAA10,PCF11,TSEN34,MED17,ARPC5L,LSM4
TF	Factor: ESE-1; motif: NSMGGAARTN	TF:M02055	0.00293999	2.53165	7623	114	69	19917	PSMB1,PSMB3,EMC7,COMMD6,NUMA1,VTI1A,SMARCC2,ZBTB8OS,COMMD5,SCAF11,LSM7,NCBP3,FUBP3,MED11,PTRHD1,PSMA6,PSMA4,COMMD10,NAA20,MIEN1,PSMA7,KRTCAP2,NOP10,NSMCE1,LSM5,MRPS24,PSMA3,MRPS10,SEC13,RPL11,WDR48,UBE2V2,NUTF2,WASHC4,NEDD1,PFDN6,HPS3,CNOT11,BORCS7,TUBA1C,ABI3,PPP1CA,MED30,VMA21,KCMF1,PIH1D1,UPF2,NFKB1,HSPA6,VBP1,RPL37A,ZC3H13,TUBB8,COMMD1,NDUFAF3,ELOC,ZNF143,GTF2A1,PSMD4,EIF3G,NAA10,PCF11,MED17,…
TF	Factor: ESE-1; motif: NSMGGAARTN	TF:M01214	0.00293999	2.53165	7623	114	69	19917	PSMB1,PSMB3,EMC7,COMMD6,NUMA1,VTI1A,SMARCC2,ZBTB8OS,COMMD5,SCAF11,LSM7,NCBP3,FUBP3,MED11,PTRHD1,PSMA6,PSMA4,COMMD10,NAA20,MIEN1,PSMA7,KRTCAP2,NOP10,NSMCE1,LSM5,MRPS24,PSMA3,MRPS10,SEC13,RPL11,WDR48,UBE2V2,NUTF2,WASHC4,NEDD1,PFDN6,HPS3,CNOT11,BORCS7,TUBA1C,ABI3,PPP1CA,MED30,VMA21,KCMF1,PIH1D1,UPF2,NFKB1,HSPA6,VBP1,RPL37A,ZC3H13,TUBB8,COMMD1,NDUFAF3,ELOC,ZNF143,GTF2A1,PSMD4,EIF3G,NAA10,PCF11,MED17,…
TF	Factor: E2F-2; motif: GCGCGCGCGYW	TF:M11531	0.00302892	2.51871	13379	114	99	19917	PSMB3,PSMB2,GUK1,EMC7,PSMA1,NUMA1,SRGAP2,SMARCC2,ZBTB8OS,SEC61G,PSMA2,PPM1B,GOSR2,HNRNPK,CNOT9,COMMD5,SCAF11,CLEC16A,PFDN1,LSM7,NCBP3,FUBP3,MED11,PTRHD1,ANAPC10,NUDT16,IRF3,COPS6,COMMD10,NAA20,MIEN1,PSMA7,COMMD7,KRTCAP2,NOP10,NSMCE1,PSMD9,LSM5,MRPS24,PSMA3,SEC13,WDR48,UBE2V2,NUTF2,MRPL34,WASHC4,NEDD1,PLEKHA2,KIAA2013,HPS3,ELP6,CNOT11,INTS12,BORCS7,TUBA1C,CENPC,CEPT1,PPP1CA,MED30,VMA21,KCMF1,PIH1D…
TF	Factor: SAP-1; motif: NRCCGGAWGYN	TF:M11437	0.0033675	2.47269	2803	114	36	19917	PSMB1,NUMA1,VTI1A,SMARCC2,GOSR2,COMMD5,FUBP3,MED11,PSMA6,NAA20,NOP10,NSMCE1,PSMD9,LSM5,SEC13,RPL11,WDR48,UBE2V2,WASHC4,NEDD1,PFDN6,HPS3,CEPT1,PPP1CA,VMA21,PIH1D1,ZC3H13,COMMD1,ZNF143,GTF2A1,EIF3G,NAA10,TSEN34,MED17,ARPC5L,TNPO1
TF	Factor: ELK1; motif: ACCGGAAGTN	TF:M03970	0.00343129	2.46454	4838	114	51	19917	PSMB1,PSMB3,COMMD6,NUMA1,SRGAP2,VTI1A,SMARCC2,ZBTB8OS,GOSR2,CNOT9,COMMD5,SCAF11,FUBP3,MED11,PSMA6,COPS6,COMMD10,NAA20,MIEN1,KRTCAP2,NOP10,NSMCE1,PSMD9,LSM5,MRPS10,SEC13,RPL11,WDR48,UBE2V2,WASHC4,NEDD1,PFDN6,HPS3,CEPT1,PPP1CA,VMA21,PIH1D1,SNX6,RPL37A,ZC3H13,COMMD1,ELOC,ZNF143,GTF2A1,EIF3G,NAA10,PCF11,TSEN34,MED17,ARPC5L,TNPO1
TF	Factor: Elf-1; motif: NANGCGGAAGTN; match class: 1	TF:M11448_1	0.004302	2.36633	2341	114	32	19917	PSMB3,EMC7,SRGAP2,SMARCC2,ZBTB8OS,PSMA2,FUBP3,PSMA6,IRF3,PSMA4,COMMD10,NSMCE1,LSM5,NUTF2,NEDD1,PFDN6,HPS3,BORCS7,ABI3,PPP1CA,VMA21,HSPA6,ZC3H13,NDUFAF3,ELOC,EIF3G,PCF11,MED17,CHMP4B,ARPC5L,LSM4,MRPS18B
TF	Factor: ELF1; motif: NCCGGAARTN	TF:M02053	0.00450941	2.34588	6085	114	59	19917	PSMB1,PSMB3,EMC7,NUMA1,VTI1A,SMARCC2,ZBTB8OS,PPM1B,COMMD5,SCAF11,NCBP3,FUBP3,MED11,ARHGEF6,ACAP1,PSMA6,PSMA4,COMMD10,NAA20,MIEN1,NOP10,NSMCE1,LSM5,MRPS24,MRPS10,SEC13,RPL11,WDR48,UBE2V2,WASHC4,NEDD1,PLEKHA2,PFDN6,HPS3,TUBA1C,CEPT1,PPP1CA,MED30,VMA21,KCMF1,PIH1D1,NFKB1,HSPA6,ITSN2,RPL37A,ZC3H13,TUBB8,COMMD1,NDUFAF3,ELOC,ZNF143,EIF3G,NAA10,PCF11,TSEN34,MED17,CBFB,ARPC5L,CNOT7
TF	Factor: ETV7; motif: NNSCGGAAGTR	TF:M08760	0.00567279	2.2462	2371	114	32	19917	PSMB1,PSMB3,EMC7,PSMA1,VTI1A,ZBTB8OS,COMMD5,FUBP3,MED11,PTRHD1,PSMA7,NSMCE1,PSMD9,LSM5,SEC13,WDR48,UBE2V2,NUTF2,PFDN6,HPS3,CNOT11,BORCS7,PPP1CA,VMA21,RPL37A,COMMD1,ELOC,NAA10,PCF11,ARPC5L,LSM4,MRPS18B
TF	Factor: GABPalpha_GABPbeta; motif: CTTCCKGY	TF:M03791	0.00623704	2.20502	3004	114	37	19917	PSMB1,SMARCC2,GOSR2,HNRNPK,CNOT9,COMMD5,NCBP3,FUBP3,COMMD10,NAA20,NOP10,NSMCE1,PSMD9,LSM5,SEC13,RPL11,MRPL34,WASHC4,NEDD1,KIAA2013,PFDN6,HPS3,ELP6,PPP1CA,MED30,VMA21,PIH1D1,ZC3H13,NDUFAF3,ZNF143,GTF2A1,EIF3G,NAA10,MED17,CHMP4B,ARPC5L,TNPO1
TF	Factor: PEA3; motif: NACCGGAAGTN; match class: 1	TF:M11430_1	0.00675167	2.17059	4943	114	51	19917	PSMB1,EMC7,SRGAP2,VTI1A,ZBTB8OS,SEC61G,PPM1B,GOSR2,COMMD5,NCBP3,FUBP3,PSMA6,PSMA4,COMMD10,NAA20,KRTCAP2,PSMD9,LSM5,WDR48,UBE2V2,NUTF2,NEDD1,PFDN6,HPS3,ELP6,BORCS7,CENPC,CEPT1,PPP1CA,MED30,VMA21,KCMF1,PIH1D1,MKRN2,HSPA6,VBP1,ITSN2,ZC3H13,NDUFAF3,ELOC,ZNF143,GTF2A1,PSMD4,EIF3G,NAA10,PCF11,TSEN34,MED17,ARPC5L,LSM4,MRPS18B
TF	Factor: ZF5; motif: GSGCGCGR; match class: 1	TF:M00716_1	0.00683757	2.1651	14230	114	102	19917	PSMB3,PSMB2,GUK1,EMC7,PSMA1,NUMA1,SRGAP2,VTI1A,SMARCC2,ZBTB8OS,SEC61G,PSMA2,PPM1B,GOSR2,HNRNPK,CNOT9,COMMD5,SCAF11,CLEC16A,PFDN1,LSM7,NCBP3,FUBP3,MED11,PTRHD1,ANAPC10,PSMA6,NUDT16,IRF3,COPS6,PSMA4,COMMD10,NAA20,PSMA7,COMMD7,KRTCAP2,NOP10,PSMD9,LSM5,MRPS24,PSMA3,SEC13,WDR48,UBE2V2,NUTF2,MRPL34,WASHC4,NEDD1,PLEKHA2,KIAA2013,PFDN6,HPS3,ELP6,CNOT11,BORCS7,TUBA1C,ABI3,CENPC,CEPT1,PPP1CA,MED30,VMA21,KC…
TF	Factor: YY1; motif: NNCGCCATTNN; match class: 1	TF:M03924_1	0.0111527	1.95262	3744	114	42	19917	PSMB1,NUMA1,VTI1A,SMARCC2,ZBTB8OS,PSMA2,PPM1B,HNRNPK,CNOT9,LSM7,NCBP3,FUBP3,PTRHD1,ANAPC10,PSMA6,NUDT16,COMMD10,PSMA7,COMMD7,NOP10,MRPS24,RPL11,WDR48,UBE2V2,NUTF2,WASHC4,PFDN6,ELP6,BORCS7,CENPC,PPP1CA,MED30,VBP1,ZNF143,GTF2A1,SRSF7,LSM14A,ARPC5L,MRPL55,CNOT7,ARID3A,MRPS18B
TF	Factor: E2F-4; motif: NTTTCSCGCC; match class: 1	TF:M07380_1	0.0114779	1.94014	8046	114	70	19917	PSMB3,PSMB2,PSMA1,NUMA1,VTI1A,SMARCC2,PSMA2,PPM1B,GOSR2,HNRNPK,CNOT9,COMMD5,SCAF11,LSM7,NCBP3,FUBP3,PTRHD1,ANAPC10,PSMA6,IRF3,MIEN1,PSMA7,NOP10,NSMCE1,MRPS24,MRPS10,NUTF2,MRPL34,NEDD1,PLEKHA2,KIAA2013,ELP6,CNOT11,INTS12,TUBA1C,CENPC,CEPT1,PPP1CA,MED30,VMA21,KCMF1,PIH1D1,MKRN2,NFKB1,HSPA6,CCDC93,SNX6,ITSN2,XPO1,TUBB8,NDUFAF3,ELOC,GTF2A1,LSM6,SRSF7,PSMD4,EIF3G,NAA10,PCF11,SRXN1,LSM14A,TSEN34,RABEPK…
TF	Factor: ELK3; motif: ACCGGAAGTN	TF:M03972	0.0122344	1.91242	1216	114	21	19917	PSMB1,VTI1A,FUBP3,MED11,NAA20,NOP10,NSMCE1,LSM5,SEC13,WDR48,WASHC4,NEDD1,PFDN6,HPS3,VMA21,PIH1D1,ZC3H13,COMMD1,EIF3G,NAA10,ARPC5L
TF	Factor: Elf-1; motif: AWCCCGGAAGTN	TF:M07415	0.0123367	1.9088	8060	114	70	19917	PSMB1,EMC7,NUMA1,SRGAP2,VTI1A,SMARCC2,PPM1B,GOSR2,HNRNPK,CNOT9,COMMD5,SCAF11,NCBP3,FUBP3,MED11,PSMA6,COPS6,COMMD10,NAA20,MIEN1,KRTCAP2,NOP10,NSMCE1,PSMD9,LSM5,MRPS24,MRPS10,SEC13,RPL11,WDR48,UBE2V2,MRPL34,WASHC4,NEDD1,PLEKHA2,KIAA2013,PFDN6,HPS3,ELP6,TUBA1C,CENPC,CEPT1,PPP1CA,MED30,VMA21,KCMF1,PIH1D1,UPF2,NFKB1,HSPA6,VBP1,SNX6,ITSN2,ZC3H13,TUBB8,COMMD1,NDUFAF3,ZNF143,GTF2A1,EIF3G,NAA10,PCF11,SRXN…
TF	Factor: ER81; motif: NACCGGAAGTN	TF:M11421	0.0146281	1.83481	2356	114	31	19917	PSMB1,VTI1A,SMARCC2,GOSR2,CNOT9,COMMD5,FUBP3,MED11,PSMA6,NAA20,NOP10,NSMCE1,PSMD9,LSM5,SEC13,WDR48,UBE2V2,WASHC4,NEDD1,PFDN6,HPS3,PPP1CA,VMA21,PIH1D1,ZC3H13,COMMD1,ZNF143,EIF3G,NAA10,MED17,ARPC5L
TF	Factor: GABP; motif: CACTTCCGGNNN	TF:M01258	0.0152284	1.81735	2860	114	35	19917	PSMB1,NUMA1,VTI1A,GOSR2,COMMD5,NCBP3,FUBP3,MED11,PSMA6,NAA20,NOP10,NSMCE1,LSM5,SEC13,WDR48,UBE2V2,WASHC4,NEDD1,PFDN6,HPS3,CEPT1,PPP1CA,MED30,VMA21,KCMF1,PIH1D1,ZC3H13,COMMD1,ZNF143,EIF3G,NAA10,TSEN34,MED17,RABEPK,ARPC5L
TF	Factor: SAP-1; motif: NRNCGGAWRYN	TF:M11436	0.0156029	1.80679	1445	114	23	19917	PSMB1,PSMB3,SMARCC2,GOSR2,COMMD5,FUBP3,NOP10,NSMCE1,PSMD9,LSM5,SEC13,WASHC4,NEDD1,HPS3,VMA21,PIH1D1,RPL37A,ZNF143,EIF3G,NAA10,PCF11,MED17,ARPC5L
TF	Factor: Net; motif: NACCGGAAGTN	TF:M11442	0.0182534	1.73866	2022	114	28	19917	PSMB1,VTI1A,SMARCC2,GOSR2,COMMD5,FUBP3,MED11,NAA20,NOP10,NSMCE1,PSMD9,LSM5,SEC13,WDR48,WASHC4,NEDD1,PFDN6,HPS3,PPP1CA,VMA21,PIH1D1,ZC3H13,COMMD1,ZNF143,EIF3G,NAA10,MED17,ARPC5L
TF	Factor: c-ets-2; motif: ACCGGAWRTN	TF:M02064	0.0191288	1.71831	11050	114	86	19917	PSMB1,PSMB3,GUK1,EMC7,COMMD6,NUMA1,SRGAP2,VTI1A,SMARCC2,ZBTB8OS,SEC61G,PPM1B,GOSR2,HNRNPK,CNOT9,COMMD5,SCAF11,LSM7,NCBP3,FUBP3,MED11,ARHGEF6,ACAP1,PSMA6,IRF3,COPS6,COMMD10,NAA20,MIEN1,KRTCAP2,NOP10,NSMCE1,PSMD9,LSM5,MRPS24,MRPS10,SEC13,RPL11,WDR48,UBE2V2,NUTF2,MRPL34,WASHC4,NEDD1,PLEKHA2,KIAA2013,PFDN6,HPS3,ELP6,INTS12,TUBA1C,CENPC,CEPT1,PPP1CA,MED30,VMA21,KCMF1,PIH1D1,MKRN2,NFKB1,HSPA6,SNX6,ITSN…
TF	Factor: GABP-alpha; motif: NRCCGGAAGTN	TF:M11415	0.0202728	1.69309	3289	114	38	19917	PSMB1,VTI1A,SMARCC2,GOSR2,HNRNPK,CNOT9,COMMD5,NCBP3,FUBP3,MED11,PSMA6,NAA20,NOP10,NSMCE1,PSMD9,LSM5,SEC13,RPL11,WDR48,UBE2V2,WASHC4,NEDD1,PFDN6,HPS3,ELP6,PPP1CA,MED30,VMA21,PIH1D1,ZC3H13,COMMD1,ZNF143,GTF2A1,EIF3G,NAA10,MED17,ARPC5L,TNPO1
TF	Factor: GABPA; motif: ACCGGAAGTN	TF:M03990	0.0255325	1.59291	5312	114	52	19917	PSMB1,EMC7,NUMA1,VTI1A,SMARCC2,PPM1B,GOSR2,HNRNPK,CNOT9,COMMD5,SCAF11,NCBP3,FUBP3,MED11,ARHGEF6,PSMA6,COMMD10,NAA20,MIEN1,NOP10,NSMCE1,PSMD9,LSM5,MRPS10,SEC13,RPL11,WDR48,UBE2V2,WASHC4,NEDD1,PLEKHA2,PFDN6,HPS3,ELP6,CEPT1,PPP1CA,MED30,VMA21,KCMF1,PIH1D1,NFKB1,ZC3H13,TUBB8,COMMD1,ZNF143,GTF2A1,EIF3G,NAA10,TSEN34,MED17,ARPC5L,TNPO1
TF	Factor: E2F-1:HES-7; motif: GGCRCGTGSYNNWNGGCGCSM	TF:M08525	0.0272316	1.56493	17224	114	112	19917	PSMB1,PSMB3,PSMB2,GUK1,EMC7,PSMA1,COMMD6,NUMA1,SRGAP2,VTI1A,SMARCC2,ZBTB8OS,SEC61G,PSMA2,PPM1B,GOSR2,HNRNPK,CNOT9,COMMD5,SCAF11,CLEC16A,PFDN1,LSM7,NCBP3,FUBP3,MED11,PTRHD1,ANAPC10,ARHGEF6,ACAP1,PSMA6,NUDT16,IRF3,COPS6,PSMA4,COMMD10,NAA20,MIEN1,PSMA7,COMMD7,KRTCAP2,NOP10,NSMCE1,PSMD9,LSM5,MRPS24,PSMA3,SEC13,RPL11,WDR48,UBE2V2,NUTF2,MRPL34,WASHC4,NEDD1,PLEKHA2,KIAA2013,PFDN6,HPS3,ELP6,CNOT11,INTS12…
TF	Factor: Elk-1:HOXB13; motif: ACCGGAAGTNGTAAAN	TF:M08222	0.0294956	1.53024	7725	114	67	19917	PSMB1,PSMB3,EMC7,PSMA1,NUMA1,SRGAP2,VTI1A,ZBTB8OS,GOSR2,HNRNPK,COMMD5,SCAF11,CLEC16A,PFDN1,FUBP3,MED11,ANAPC10,ARHGEF6,ACAP1,PSMA6,PSMA4,COMMD10,NAA20,KRTCAP2,NOP10,NSMCE1,PSMD9,LSM5,PSMA3,MRPS10,SEC13,WDR48,UBE2V2,WASHC4,KIAA2013,PFDN6,HPS3,CNOT11,BORCS7,ABI3,CEPT1,PPP1CA,MED30,VMA21,KCMF1,PIH1D1,MKRN2,HSPA6,CCDC93,SNX6,XPO1,RPL37A,ZC3H13,TUBB8,COMMD1,ELOC,ZNF143,LSM6,EIF3G,NAA10,PCF11,SRXN1,MED…
TF	Factor: etv3; motif: ACCGGAAGYN	TF:M02068	0.0313958	1.50313	3485	114	39	19917	PSMB1,PSMB3,COMMD6,SRGAP2,VTI1A,SMARCC2,ZBTB8OS,GOSR2,CNOT9,COMMD5,FUBP3,MED11,NAA20,NOP10,NSMCE1,PSMD9,LSM5,SEC13,WDR48,UBE2V2,NUTF2,WASHC4,NEDD1,PFDN6,HPS3,PPP1CA,VMA21,PIH1D1,MKRN2,RPL37A,ZC3H13,COMMD1,ELOC,ZNF143,EIF3G,NAA10,PCF11,MED17,ARPC5L
TF	Factor: ELF2; motif: CCCGGAARYN	TF:M02054	0.0318952	1.49628	3087	114	36	19917	PSMB1,EMC7,VTI1A,SMARCC2,GOSR2,COMMD5,SCAF11,FUBP3,MED11,PSMA6,NAA20,MIEN1,NOP10,NSMCE1,PSMD9,LSM5,MRPS10,SEC13,WDR48,UBE2V2,WASHC4,NEDD1,PFDN6,HPS3,PPP1CA,VMA21,KCMF1,PIH1D1,ZC3H13,TUBB8,COMMD1,ZNF143,EIF3G,NAA10,MED17,ARPC5L
TF	Factor: E2F-7; motif: GRGGCGGGAANNN	TF:M09896	0.0331918	1.47897	10034	114	80	19917	PSMB3,GUK1,PSMA1,NUMA1,SRGAP2,VTI1A,SMARCC2,ZBTB8OS,PSMA2,PPM1B,GOSR2,HNRNPK,CNOT9,COMMD5,SCAF11,CLEC16A,LSM7,NCBP3,FUBP3,MED11,PTRHD1,ANAPC10,ACAP1,PSMA6,IRF3,NAA20,PSMA7,NOP10,NSMCE1,MRPS24,MRPS10,NUTF2,MRPL34,NEDD1,PLEKHA2,KIAA2013,PFDN6,ELP6,CNOT11,INTS12,ABI3,CEPT1,PPP1CA,MED30,VMA21,KCMF1,PIH1D1,UPF2,TRA2A,MKRN2,NFKB1,HSPA6,CCDC93,SNX6,XPO1,ZC3H13,TUBB8,NDUFAF3,ELOC,GTF2A1,LSM6,LSM12,SRSF7,…
TF	Factor: Net; motif: NRCCGGAAGTN	TF:M11439	0.0338025	1.47105	2580	114	32	19917	PSMB1,VTI1A,SMARCC2,GOSR2,COMMD5,FUBP3,MED11,PSMA6,NAA20,NOP10,NSMCE1,PSMD9,LSM5,SEC13,RPL11,WDR48,UBE2V2,WASHC4,NEDD1,PFDN6,HPS3,PPP1CA,VMA21,PIH1D1,ZC3H13,COMMD1,ZNF143,GTF2A1,EIF3G,NAA10,MED17,ARPC5L
TF	Factor: ETV3; motif: ACCGGAAGTN	TF:M03981	0.0381792	1.41817	2346	114	30	19917	PSMB1,PSMB3,SRGAP2,VTI1A,COMMD5,FUBP3,MED11,PSMA6,NAA20,NOP10,NSMCE1,LSM5,SEC13,WDR48,UBE2V2,WASHC4,NEDD1,PFDN6,HPS3,PPP1CA,VMA21,PIH1D1,RPL37A,ZC3H13,COMMD1,EIF3G,NAA10,PCF11,MED17,ARPC5L
TF	Factor: EHF; motif: CSCGGAARTN; match class: 1	TF:M02052_1	0.0429636	1.3669	4086	114	43	19917	PSMB3,EMC7,NUMA1,VTI1A,SMARCC2,ZBTB8OS,CNOT9,COMMD5,FUBP3,PTRHD1,PSMA6,IRF3,PSMA4,NAA20,PSMA7,KRTCAP2,PSMD9,LSM5,NUTF2,NEDD1,PFDN6,HPS3,BORCS7,TUBA1C,ABI3,PPP1CA,VMA21,KCMF1,PIH1D1,UPF2,HSPA6,ZC3H13,COMMD1,ELOC,GTF2A1,EIF3G,TSEN34,MED17,RABEPK,CHMP4B,ARPC5L,LSM4,MRPS18B
TF	Factor: FEV; motif: ACCGGAAGTN	TF:M03987	0.0447098	1.3496	1324	114	21	19917	PSMB1,VTI1A,FUBP3,MED11,NAA20,NOP10,NSMCE1,LSM5,SEC13,WDR48,WASHC4,NEDD1,PFDN6,HPS3,VMA21,PIH1D1,ZC3H13,COMMD1,EIF3G,NAA10,ARPC5L
TF	Factor: ERG; motif: ACCGGAARTN	TF:M03975	0.0447221	1.34948	10098	114	80	19917	PSMB1,PSMB3,EMC7,COMMD6,NUMA1,SRGAP2,VTI1A,SMARCC2,ZBTB8OS,SEC61G,PPM1B,GOSR2,HNRNPK,CNOT9,COMMD5,SCAF11,NCBP3,FUBP3,MED11,ACAP1,PSMA6,IRF3,COPS6,COMMD10,NAA20,MIEN1,KRTCAP2,NOP10,NSMCE1,PSMD9,LSM5,MRPS24,MRPS10,SEC13,RPL11,WDR48,UBE2V2,NUTF2,MRPL34,WASHC4,NEDD1,KIAA2013,PFDN6,HPS3,ELP6,INTS12,TUBA1C,CENPC,CEPT1,PPP1CA,MED30,VMA21,KCMF1,PIH1D1,MKRN2,HSPA6,VBP1,SNX6,ITSN2,RPL37A,ZC3H13,TUBB8,COMMD…
TF	Factor: ER71; motif: NACCGGAARTN	TF:M11413	0.0450749	1.34607	2122	114	28	19917	PSMB1,VTI1A,SMARCC2,COMMD5,FUBP3,MED11,PSMA6,NAA20,NOP10,NSMCE1,LSM5,SEC13,WDR48,UBE2V2,WASHC4,NEDD1,PFDN6,HPS3,PPP1CA,VMA21,PIH1D1,ZC3H13,COMMD1,ZNF143,EIF3G,NAA10,MED17,ARPC5L
HPA	appendix	HPA:0030000	4.2014e-09	8.37661	7644	79	78	10877	PSMB1,PSMB3,PSMB2,GUK1,EMC7,PSMA1,NUMA1,SRGAP2,VTI1A,SMARCC2,ZBTB8OS,PPM1B,HNRNPK,CNOT9,SCAF11,CLEC16A,PFDN1,NCBP3,PTRHD1,ANAPC10,ARHGEF6,ACAP1,PSMA6,IRF3,COPS6,PSMA4,COMMD10,MIEN1,PSMA7,NOP10,NSMCE1,PSMD9,MRPS24,PSMA3,MRPS10,SEC13,RPL11,WDR48,NUTF2,NEDD1,PLEKHA2,PFDN6,HPS3,CNOT11,INTS12,BORCS7,TUBA1C,ABI3,AIMP1,PPP1CA,KCMF1,PIH1D1,MKRN2,NFKB1,HSPA6,VBP1,CCDC93,SNX6,ITSN2,XPO1,RPL37A,COMMD1,NDUFA…
HPA	endometrium 1	HPA:0160000	1.15066e-08	7.93905	6954	79	75	10877	PSMB1,PSMB3,PSMB2,GUK1,EMC7,PSMA1,NUMA1,SRGAP2,VTI1A,SMARCC2,ZBTB8OS,PPM1B,HNRNPK,CNOT9,CLEC16A,PFDN1,NCBP3,PTRHD1,ANAPC10,ARHGEF6,ACAP1,PSMA6,IRF3,COPS6,PSMA4,COMMD10,MIEN1,PSMA7,NOP10,PSMD9,MRPS24,PSMA3,MRPS10,SEC13,RPL11,WDR48,NUTF2,NEDD1,PLEKHA2,PFDN6,HPS3,CNOT11,INTS12,BORCS7,TUBA1C,AIMP1,PPP1CA,KCMF1,PIH1D1,MKRN2,NFKB1,HSPA6,VBP1,CCDC93,SNX6,ITSN2,XPO1,RPL37A,COMMD1,NDUFAF3,ZNF143,LSM6,LSM1…
HPA	thyroid gland; glandular cells[â‰¥Low]	HPA:0590051	2.24062e-08	7.64963	7022	79	75	10877	PSMB1,PSMB3,PSMB2,GUK1,EMC7,PSMA1,NUMA1,SRGAP2,VTI1A,SMARCC2,ZBTB8OS,PPM1B,HNRNPK,CNOT9,SCAF11,CLEC16A,PFDN1,NCBP3,PTRHD1,ANAPC10,ACAP1,PSMA6,IRF3,COPS6,PSMA4,COMMD10,MIEN1,PSMA7,NOP10,NSMCE1,PSMD9,MRPS24,PSMA3,MRPS10,SEC13,RPL11,WDR48,NUTF2,NEDD1,PLEKHA2,PFDN6,HPS3,INTS12,BORCS7,TUBA1C,AIMP1,PPP1CA,KCMF1,PIH1D1,MKRN2,NFKB1,HSPA6,VBP1,CCDC93,ITSN2,XPO1,RPL37A,COMMD1,NDUFAF3,ZNF143,LSM6,LSM12,SRSF…
HPA	thyroid gland	HPA:0590000	2.24062e-08	7.64963	7022	79	75	10877	PSMB1,PSMB3,PSMB2,GUK1,EMC7,PSMA1,NUMA1,SRGAP2,VTI1A,SMARCC2,ZBTB8OS,PPM1B,HNRNPK,CNOT9,SCAF11,CLEC16A,PFDN1,NCBP3,PTRHD1,ANAPC10,ACAP1,PSMA6,IRF3,COPS6,PSMA4,COMMD10,MIEN1,PSMA7,NOP10,NSMCE1,PSMD9,MRPS24,PSMA3,MRPS10,SEC13,RPL11,WDR48,NUTF2,NEDD1,PLEKHA2,PFDN6,HPS3,INTS12,BORCS7,TUBA1C,AIMP1,PPP1CA,KCMF1,PIH1D1,MKRN2,NFKB1,HSPA6,VBP1,CCDC93,ITSN2,XPO1,RPL37A,COMMD1,NDUFAF3,ZNF143,LSM6,LSM12,SRSF…
HPA	breast	HPA:0050000	4.08441e-08	7.38887	7084	79	75	10877	PSMB1,PSMB3,PSMB2,GUK1,EMC7,PSMA1,NUMA1,SRGAP2,VTI1A,SMARCC2,ZBTB8OS,PPM1B,HNRNPK,CNOT9,SCAF11,CLEC16A,PFDN1,NCBP3,PTRHD1,ANAPC10,ARHGEF6,PSMA6,IRF3,COPS6,PSMA4,COMMD10,MIEN1,PSMA7,NOP10,NSMCE1,PSMD9,MRPS24,PSMA3,MRPS10,SEC13,RPL11,WDR48,NUTF2,NEDD1,PLEKHA2,PFDN6,HPS3,CNOT11,INTS12,BORCS7,TUBA1C,ABI3,AIMP1,KCMF1,PIH1D1,MKRN2,NFKB1,HSPA6,VBP1,CCDC93,SNX6,XPO1,RPL37A,COMMD1,NDUFAF3,ZNF143,LSM6,LSM1…
HPA	breast; glandular cells[â‰¥Low]	HPA:0050051	8.02802e-08	7.09539	6717	79	73	10877	PSMB1,PSMB3,PSMB2,GUK1,EMC7,PSMA1,NUMA1,SRGAP2,VTI1A,SMARCC2,ZBTB8OS,PPM1B,HNRNPK,CNOT9,SCAF11,CLEC16A,PFDN1,NCBP3,PTRHD1,ANAPC10,ARHGEF6,PSMA6,IRF3,COPS6,PSMA4,COMMD10,MIEN1,PSMA7,NOP10,PSMD9,MRPS24,PSMA3,MRPS10,SEC13,RPL11,WDR48,NUTF2,NEDD1,PLEKHA2,PFDN6,HPS3,CNOT11,INTS12,BORCS7,TUBA1C,AIMP1,KCMF1,PIH1D1,MKRN2,NFKB1,HSPA6,VBP1,CCDC93,SNX6,XPO1,RPL37A,COMMD1,NDUFAF3,ZNF143,LSM6,LSM12,SRSF7,PSMD…
HPA	colon; glandular cells[â‰¥Medium]	HPA:0130052	9.17555e-08	7.03737	6333	79	71	10877	PSMB1,PSMB3,PSMB2,GUK1,EMC7,PSMA1,NUMA1,SRGAP2,VTI1A,SMARCC2,PPM1B,HNRNPK,CNOT9,SCAF11,CLEC16A,PFDN1,NCBP3,PTRHD1,ANAPC10,ACAP1,IRF3,COPS6,PSMA4,COMMD10,MIEN1,PSMA7,NOP10,NSMCE1,PSMD9,MRPS24,PSMA3,MRPS10,SEC13,RPL11,WDR48,NUTF2,NEDD1,PLEKHA2,PFDN6,HPS3,CNOT11,INTS12,BORCS7,TUBA1C,AIMP1,PPP1CA,KCMF1,PIH1D1,MKRN2,NFKB1,CCDC93,SNX6,XPO1,RPL37A,COMMD1,NDUFAF3,ZNF143,LSM6,LSM12,SRSF7,PSMD4,EIF3G,NAA10…
HPA	lung	HPA:0300000	1.48879e-07	6.82717	7220	79	75	10877	PSMB1,PSMB3,PSMB2,GUK1,EMC7,PSMA1,NUMA1,SRGAP2,VTI1A,SMARCC2,ZBTB8OS,PPM1B,HNRNPK,CNOT9,SCAF11,CLEC16A,PFDN1,NCBP3,PTRHD1,ANAPC10,ARHGEF6,ACAP1,PSMA6,IRF3,COPS6,PSMA4,COMMD10,MIEN1,PSMA7,NOP10,NSMCE1,PSMD9,MRPS24,PSMA3,MRPS10,RPL11,WDR48,NUTF2,NEDD1,PLEKHA2,HPS3,CNOT11,INTS12,BORCS7,TUBA1C,ABI3,AIMP1,PPP1CA,KCMF1,PIH1D1,MKRN2,NFKB1,HSPA6,VBP1,CCDC93,SNX6,XPO1,RPL37A,COMMD1,NDUFAF3,ZNF143,LSM6,LSM…
HPA	colon	HPA:0130000	1.60946e-07	6.79332	8020	79	78	10877	PSMB1,PSMB3,PSMB2,GUK1,EMC7,PSMA1,NUMA1,SRGAP2,VTI1A,SMARCC2,ZBTB8OS,PPM1B,HNRNPK,CNOT9,SCAF11,CLEC16A,PFDN1,NCBP3,PTRHD1,ANAPC10,ARHGEF6,ACAP1,PSMA6,IRF3,COPS6,PSMA4,COMMD10,MIEN1,PSMA7,NOP10,NSMCE1,PSMD9,MRPS24,PSMA3,MRPS10,SEC13,RPL11,WDR48,NUTF2,NEDD1,PLEKHA2,PFDN6,HPS3,CNOT11,INTS12,BORCS7,TUBA1C,ABI3,AIMP1,PPP1CA,KCMF1,PIH1D1,MKRN2,NFKB1,HSPA6,VBP1,CCDC93,SNX6,ITSN2,XPO1,RPL37A,COMMD1,NDUFA…
HPA	colon; glandular cells[â‰¥Low]	HPA:0130051	1.68265e-07	6.77401	7473	79	76	10877	PSMB1,PSMB3,PSMB2,GUK1,EMC7,PSMA1,NUMA1,SRGAP2,VTI1A,SMARCC2,PPM1B,HNRNPK,CNOT9,SCAF11,CLEC16A,PFDN1,NCBP3,PTRHD1,ANAPC10,ARHGEF6,ACAP1,PSMA6,IRF3,COPS6,PSMA4,COMMD10,MIEN1,PSMA7,NOP10,NSMCE1,PSMD9,MRPS24,PSMA3,MRPS10,SEC13,RPL11,WDR48,NUTF2,NEDD1,PLEKHA2,PFDN6,HPS3,CNOT11,INTS12,BORCS7,TUBA1C,AIMP1,PPP1CA,KCMF1,PIH1D1,MKRN2,NFKB1,HSPA6,VBP1,CCDC93,SNX6,ITSN2,XPO1,RPL37A,COMMD1,NDUFAF3,ZNF143,LSM…
HPA	pancreas	HPA:0350000	3.28725e-07	6.48317	7305	79	75	10877	PSMB1,PSMB3,PSMB2,GUK1,EMC7,PSMA1,NUMA1,SRGAP2,VTI1A,SMARCC2,PPM1B,HNRNPK,CNOT9,SCAF11,CLEC16A,PFDN1,NCBP3,PTRHD1,ANAPC10,ARHGEF6,ACAP1,PSMA6,IRF3,COPS6,PSMA4,COMMD10,MIEN1,PSMA7,NOP10,NSMCE1,PSMD9,MRPS24,PSMA3,MRPS10,SEC13,RPL11,WDR48,NUTF2,NEDD1,PLEKHA2,PFDN6,HPS3,CNOT11,INTS12,BORCS7,TUBA1C,AIMP1,PPP1CA,KCMF1,PIH1D1,MKRN2,NFKB1,HSPA6,VBP1,CCDC93,ITSN2,XPO1,RPL37A,COMMD1,NDUFAF3,ZNF143,LSM6,LSM…
HPA	esophagus; squamous epithelial cells[â‰¥Medium]	HPA:0190222	4.76656e-07	6.3218	4989	79	62	10877	PSMB1,PSMB3,PSMB2,GUK1,PSMA1,NUMA1,SRGAP2,VTI1A,SMARCC2,PPM1B,HNRNPK,SCAF11,PFDN1,NCBP3,ANAPC10,PSMA6,IRF3,COPS6,PSMA4,COMMD10,MIEN1,PSMA7,NOP10,NSMCE1,PSMD9,MRPS24,MRPS10,SEC13,WDR48,NEDD1,PLEKHA2,PFDN6,HPS3,CNOT11,INTS12,BORCS7,TUBA1C,AIMP1,PPP1CA,KCMF1,PIH1D1,MKRN2,NFKB1,HSPA6,XPO1,RPL37A,COMMD1,NDUFAF3,ZNF143,LSM6,LSM12,SRSF7,PSMD4,EIF3G,NAA10,LSM14A,TSEN34,RABEPK,CHMP4B,MRPL55,MRPS18B,TNPO1
HPA	gallbladder; glandular cells[â‰¥Medium]	HPA:0220052	4.92438e-07	6.30765	6512	79	71	10877	PSMB1,PSMB3,PSMB2,GUK1,EMC7,PSMA1,NUMA1,SRGAP2,VTI1A,SMARCC2,ZBTB8OS,PPM1B,HNRNPK,CNOT9,SCAF11,CLEC16A,PFDN1,NCBP3,PTRHD1,ACAP1,PSMA6,IRF3,COPS6,PSMA4,COMMD10,MIEN1,PSMA7,NOP10,NSMCE1,PSMD9,MRPS24,PSMA3,MRPS10,RPL11,WDR48,NUTF2,NEDD1,PLEKHA2,PFDN6,HPS3,CNOT11,INTS12,BORCS7,TUBA1C,AIMP1,PPP1CA,KCMF1,PIH1D1,MKRN2,NFKB1,HSPA6,CCDC93,ITSN2,XPO1,RPL37A,COMMD1,NDUFAF3,LSM6,LSM12,SRSF7,PSMD4,EIF3G,NAA10…
HPA	endometrium 1; glandular cells[â‰¥Low]	HPA:0160051	5.62658e-07	6.24976	6722	79	72	10877	PSMB1,PSMB3,PSMB2,GUK1,EMC7,PSMA1,NUMA1,SRGAP2,VTI1A,SMARCC2,ZBTB8OS,PPM1B,HNRNPK,CNOT9,CLEC16A,PFDN1,NCBP3,PTRHD1,ANAPC10,ACAP1,PSMA6,IRF3,COPS6,PSMA4,COMMD10,MIEN1,PSMA7,NOP10,PSMD9,MRPS24,PSMA3,MRPS10,SEC13,RPL11,WDR48,NUTF2,NEDD1,PLEKHA2,PFDN6,HPS3,CNOT11,INTS12,BORCS7,TUBA1C,AIMP1,PPP1CA,KCMF1,MKRN2,NFKB1,HSPA6,VBP1,CCDC93,ITSN2,XPO1,RPL37A,COMMD1,NDUFAF3,ZNF143,LSM6,LSM12,SRSF7,PSMD4,EIF3G,…
HPA	seminal vesicle	HPA:0430000	5.99842e-07	6.22196	6729	79	72	10877	PSMB1,PSMB3,PSMB2,GUK1,EMC7,PSMA1,NUMA1,SRGAP2,VTI1A,SMARCC2,ZBTB8OS,PPM1B,HNRNPK,CNOT9,SCAF11,CLEC16A,PFDN1,NCBP3,PTRHD1,ANAPC10,PSMA6,IRF3,COPS6,PSMA4,MIEN1,PSMA7,NOP10,PSMD9,MRPS24,PSMA3,MRPS10,SEC13,RPL11,WDR48,NUTF2,NEDD1,PLEKHA2,PFDN6,HPS3,CNOT11,INTS12,BORCS7,TUBA1C,AIMP1,PPP1CA,KCMF1,PIH1D1,MKRN2,NFKB1,HSPA6,VBP1,CCDC93,SNX6,XPO1,RPL37A,COMMD1,NDUFAF3,ZNF143,LSM6,LSM12,SRSF7,PSMD4,EIF3G,N…
HPA	seminal vesicle; glandular cells[â‰¥Low]	HPA:0430051	5.99842e-07	6.22196	6729	79	72	10877	PSMB1,PSMB3,PSMB2,GUK1,EMC7,PSMA1,NUMA1,SRGAP2,VTI1A,SMARCC2,ZBTB8OS,PPM1B,HNRNPK,CNOT9,SCAF11,CLEC16A,PFDN1,NCBP3,PTRHD1,ANAPC10,PSMA6,IRF3,COPS6,PSMA4,MIEN1,PSMA7,NOP10,PSMD9,MRPS24,PSMA3,MRPS10,SEC13,RPL11,WDR48,NUTF2,NEDD1,PLEKHA2,PFDN6,HPS3,CNOT11,INTS12,BORCS7,TUBA1C,AIMP1,PPP1CA,KCMF1,PIH1D1,MKRN2,NFKB1,HSPA6,VBP1,CCDC93,SNX6,XPO1,RPL37A,COMMD1,NDUFAF3,ZNF143,LSM6,LSM12,SRSF7,PSMD4,EIF3G,N…
HPA	small intestine; glandular cells[â‰¥Low]	HPA:0480051	8.86706e-07	6.05222	7653	79	76	10877	PSMB1,PSMB3,PSMB2,GUK1,EMC7,PSMA1,NUMA1,SRGAP2,VTI1A,SMARCC2,PPM1B,HNRNPK,CNOT9,SCAF11,CLEC16A,PFDN1,NCBP3,PTRHD1,ANAPC10,ARHGEF6,ACAP1,PSMA6,IRF3,COPS6,PSMA4,COMMD10,MIEN1,PSMA7,NOP10,NSMCE1,PSMD9,MRPS24,PSMA3,MRPS10,SEC13,RPL11,WDR48,NUTF2,NEDD1,PLEKHA2,PFDN6,HPS3,CNOT11,INTS12,BORCS7,TUBA1C,AIMP1,PPP1CA,KCMF1,PIH1D1,MKRN2,NFKB1,HSPA6,VBP1,CCDC93,SNX6,ITSN2,XPO1,RPL37A,COMMD1,NDUFAF3,ZNF143,LSM…
HPA	small intestine	HPA:0480000	8.86706e-07	6.05222	7653	79	76	10877	PSMB1,PSMB3,PSMB2,GUK1,EMC7,PSMA1,NUMA1,SRGAP2,VTI1A,SMARCC2,PPM1B,HNRNPK,CNOT9,SCAF11,CLEC16A,PFDN1,NCBP3,PTRHD1,ANAPC10,ARHGEF6,ACAP1,PSMA6,IRF3,COPS6,PSMA4,COMMD10,MIEN1,PSMA7,NOP10,NSMCE1,PSMD9,MRPS24,PSMA3,MRPS10,SEC13,RPL11,WDR48,NUTF2,NEDD1,PLEKHA2,PFDN6,HPS3,CNOT11,INTS12,BORCS7,TUBA1C,AIMP1,PPP1CA,KCMF1,PIH1D1,MKRN2,NFKB1,HSPA6,VBP1,CCDC93,SNX6,ITSN2,XPO1,RPL37A,COMMD1,NDUFAF3,ZNF143,LSM…
HPA	esophagus	HPA:0190000	9.41316e-07	6.02626	6583	79	71	10877	PSMB1,PSMB3,PSMB2,GUK1,EMC7,PSMA1,NUMA1,SRGAP2,VTI1A,SMARCC2,PPM1B,HNRNPK,SCAF11,CLEC16A,PFDN1,NCBP3,PTRHD1,ANAPC10,ACAP1,PSMA6,IRF3,COPS6,PSMA4,COMMD10,MIEN1,PSMA7,NOP10,NSMCE1,PSMD9,MRPS24,MRPS10,SEC13,RPL11,WDR48,NUTF2,NEDD1,PLEKHA2,PFDN6,HPS3,CNOT11,INTS12,BORCS7,TUBA1C,AIMP1,PPP1CA,KCMF1,PIH1D1,MKRN2,NFKB1,HSPA6,VBP1,CCDC93,SNX6,XPO1,RPL37A,COMMD1,NDUFAF3,ZNF143,LSM6,LSM12,SRSF7,PSMD4,EIF3G,…
HPA	esophagus; squamous epithelial cells[â‰¥Low]	HPA:0190221	9.41316e-07	6.02626	6583	79	71	10877	PSMB1,PSMB3,PSMB2,GUK1,EMC7,PSMA1,NUMA1,SRGAP2,VTI1A,SMARCC2,PPM1B,HNRNPK,SCAF11,CLEC16A,PFDN1,NCBP3,PTRHD1,ANAPC10,ACAP1,PSMA6,IRF3,COPS6,PSMA4,COMMD10,MIEN1,PSMA7,NOP10,NSMCE1,PSMD9,MRPS24,MRPS10,SEC13,RPL11,WDR48,NUTF2,NEDD1,PLEKHA2,PFDN6,HPS3,CNOT11,INTS12,BORCS7,TUBA1C,AIMP1,PPP1CA,KCMF1,PIH1D1,MKRN2,NFKB1,HSPA6,VBP1,CCDC93,SNX6,XPO1,RPL37A,COMMD1,NDUFAF3,ZNF143,LSM6,LSM12,SRSF7,PSMD4,EIF3G,…
HPA	urinary bladder; urothelial cells[â‰¥Low]	HPA:0610831	9.91231e-07	6.00383	7201	79	74	10877	PSMB1,PSMB3,PSMB2,GUK1,EMC7,PSMA1,NUMA1,SRGAP2,VTI1A,SMARCC2,PPM1B,HNRNPK,CNOT9,SCAF11,CLEC16A,PFDN1,NCBP3,PTRHD1,ANAPC10,ARHGEF6,PSMA6,IRF3,COPS6,PSMA4,COMMD10,MIEN1,PSMA7,NOP10,NSMCE1,PSMD9,MRPS24,PSMA3,MRPS10,RPL11,WDR48,NUTF2,NEDD1,PLEKHA2,PFDN6,HPS3,CNOT11,INTS12,BORCS7,TUBA1C,AIMP1,PPP1CA,KCMF1,PIH1D1,MKRN2,NFKB1,HSPA6,VBP1,CCDC93,SNX6,ITSN2,XPO1,RPL37A,COMMD1,NDUFAF3,ZNF143,LSM6,LSM12,SRSF…
HPA	urinary bladder	HPA:0610000	9.91231e-07	6.00383	7201	79	74	10877	PSMB1,PSMB3,PSMB2,GUK1,EMC7,PSMA1,NUMA1,SRGAP2,VTI1A,SMARCC2,PPM1B,HNRNPK,CNOT9,SCAF11,CLEC16A,PFDN1,NCBP3,PTRHD1,ANAPC10,ARHGEF6,PSMA6,IRF3,COPS6,PSMA4,COMMD10,MIEN1,PSMA7,NOP10,NSMCE1,PSMD9,MRPS24,PSMA3,MRPS10,RPL11,WDR48,NUTF2,NEDD1,PLEKHA2,PFDN6,HPS3,CNOT11,INTS12,BORCS7,TUBA1C,AIMP1,PPP1CA,KCMF1,PIH1D1,MKRN2,NFKB1,HSPA6,VBP1,CCDC93,SNX6,ITSN2,XPO1,RPL37A,COMMD1,NDUFAF3,ZNF143,LSM6,LSM12,SRSF…
HPA	duodenum; glandular cells[â‰¥Low]	HPA:0150051	9.97804e-07	6.00095	7666	79	76	10877	PSMB1,PSMB3,PSMB2,GUK1,EMC7,PSMA1,NUMA1,SRGAP2,VTI1A,SMARCC2,PPM1B,HNRNPK,CNOT9,SCAF11,CLEC16A,PFDN1,NCBP3,PTRHD1,ANAPC10,ARHGEF6,ACAP1,PSMA6,IRF3,COPS6,PSMA4,COMMD10,MIEN1,PSMA7,NOP10,NSMCE1,PSMD9,MRPS24,PSMA3,MRPS10,SEC13,RPL11,WDR48,NUTF2,NEDD1,PLEKHA2,PFDN6,HPS3,CNOT11,INTS12,BORCS7,TUBA1C,AIMP1,PPP1CA,KCMF1,PIH1D1,MKRN2,NFKB1,HSPA6,VBP1,CCDC93,SNX6,ITSN2,XPO1,RPL37A,COMMD1,NDUFAF3,ZNF143,LSM…
HPA	duodenum	HPA:0150000	9.97804e-07	6.00095	7666	79	76	10877	PSMB1,PSMB3,PSMB2,GUK1,EMC7,PSMA1,NUMA1,SRGAP2,VTI1A,SMARCC2,PPM1B,HNRNPK,CNOT9,SCAF11,CLEC16A,PFDN1,NCBP3,PTRHD1,ANAPC10,ARHGEF6,ACAP1,PSMA6,IRF3,COPS6,PSMA4,COMMD10,MIEN1,PSMA7,NOP10,NSMCE1,PSMD9,MRPS24,PSMA3,MRPS10,SEC13,RPL11,WDR48,NUTF2,NEDD1,PLEKHA2,PFDN6,HPS3,CNOT11,INTS12,BORCS7,TUBA1C,AIMP1,PPP1CA,KCMF1,PIH1D1,MKRN2,NFKB1,HSPA6,VBP1,CCDC93,SNX6,ITSN2,XPO1,RPL37A,COMMD1,NDUFAF3,ZNF143,LSM…
HPA	appendix; glandular cells[â‰¥Low]	HPA:0030051	1.00022e-06	5.99991	7202	79	74	10877	PSMB1,PSMB3,PSMB2,GUK1,EMC7,PSMA1,NUMA1,SRGAP2,VTI1A,SMARCC2,PPM1B,HNRNPK,CNOT9,SCAF11,CLEC16A,PFDN1,NCBP3,PTRHD1,ANAPC10,ACAP1,PSMA6,IRF3,COPS6,PSMA4,COMMD10,MIEN1,PSMA7,NOP10,NSMCE1,PSMD9,MRPS24,PSMA3,MRPS10,SEC13,RPL11,WDR48,NUTF2,NEDD1,PLEKHA2,PFDN6,HPS3,CNOT11,INTS12,BORCS7,TUBA1C,AIMP1,PPP1CA,KCMF1,PIH1D1,MKRN2,NFKB1,HSPA6,VBP1,CCDC93,SNX6,ITSN2,XPO1,RPL37A,COMMD1,NDUFAF3,ZNF143,LSM6,LSM12,…
HPA	skin 1	HPA:0460000	1.0662e-06	5.97216	6996	79	73	10877	PSMB1,PSMB3,PSMB2,GUK1,EMC7,PSMA1,NUMA1,SRGAP2,VTI1A,SMARCC2,ZBTB8OS,PPM1B,HNRNPK,CNOT9,SCAF11,CLEC16A,NCBP3,PTRHD1,ANAPC10,ARHGEF6,ACAP1,PSMA6,IRF3,COPS6,COMMD10,MIEN1,PSMA7,NOP10,NSMCE1,PSMD9,MRPS24,PSMA3,MRPS10,SEC13,RPL11,WDR48,NUTF2,NEDD1,PFDN6,HPS3,INTS12,BORCS7,TUBA1C,ABI3,AIMP1,PPP1CA,KCMF1,PIH1D1,MKRN2,NFKB1,HSPA6,VBP1,CCDC93,SNX6,ITSN2,XPO1,RPL37A,COMMD1,NDUFAF3,ZNF143,LSM6,LSM12,SRSF7,…
HPA	tonsil	HPA:0600000	1.10239e-06	5.95767	7677	79	76	10877	PSMB1,PSMB3,PSMB2,GUK1,EMC7,PSMA1,NUMA1,SRGAP2,VTI1A,SMARCC2,ZBTB8OS,PPM1B,HNRNPK,CNOT9,SCAF11,PFDN1,NCBP3,PTRHD1,ANAPC10,ARHGEF6,ACAP1,PSMA6,IRF3,COPS6,PSMA4,COMMD10,MIEN1,PSMA7,NOP10,NSMCE1,PSMD9,MRPS24,MRPS10,SEC13,RPL11,WDR48,NUTF2,NEDD1,PLEKHA2,PFDN6,HPS3,CNOT11,INTS12,BORCS7,TUBA1C,ABI3,AIMP1,PPP1CA,KCMF1,PIH1D1,MKRN2,NFKB1,HSPA6,VBP1,CCDC93,ITSN2,XPO1,RPL37A,COMMD1,NDUFAF3,ZNF143,LSM6,LSM1…
HPA	endometrium 2	HPA:0170000	1.29469e-06	5.88783	6814	79	72	10877	PSMB1,PSMB3,PSMB2,GUK1,EMC7,PSMA1,NUMA1,SRGAP2,VTI1A,SMARCC2,ZBTB8OS,PPM1B,HNRNPK,CNOT9,SCAF11,CLEC16A,PFDN1,NCBP3,PTRHD1,ANAPC10,ACAP1,PSMA6,IRF3,COPS6,PSMA4,MIEN1,PSMA7,NOP10,PSMD9,MRPS24,PSMA3,MRPS10,SEC13,RPL11,WDR48,NUTF2,NEDD1,PLEKHA2,PFDN6,HPS3,CNOT11,INTS12,BORCS7,TUBA1C,AIMP1,PPP1CA,KCMF1,PIH1D1,MKRN2,NFKB1,HSPA6,VBP1,CCDC93,SNX6,XPO1,RPL37A,COMMD1,NDUFAF3,ZNF143,LSM12,SRSF7,PSMD4,EIF3G,…
HPA	lymph node	HPA:0310000	1.3115e-06	5.88223	6431	79	70	10877	PSMB1,PSMB2,GUK1,EMC7,PSMA1,NUMA1,SRGAP2,VTI1A,SMARCC2,ZBTB8OS,PPM1B,HNRNPK,CNOT9,SCAF11,PFDN1,NCBP3,PTRHD1,ANAPC10,ARHGEF6,ACAP1,PSMA6,IRF3,COPS6,PSMA4,COMMD10,PSMA7,NOP10,NSMCE1,PSMD9,MRPS24,MRPS10,RPL11,WDR48,NUTF2,NEDD1,PLEKHA2,PFDN6,HPS3,INTS12,BORCS7,TUBA1C,ABI3,AIMP1,KCMF1,PIH1D1,MKRN2,NFKB1,HSPA6,VBP1,CCDC93,SNX6,XPO1,RPL37A,COMMD1,NDUFAF3,ZNF143,LSM6,LSM12,SRSF7,PSMD4,EIF3G,NAA10,LSM14A,…
HPA	endometrium 2; glandular cells[â‰¥Low]	HPA:0170051	1.39912e-06	5.85414	6627	79	71	10877	PSMB1,PSMB3,PSMB2,GUK1,EMC7,PSMA1,NUMA1,SRGAP2,VTI1A,SMARCC2,ZBTB8OS,PPM1B,HNRNPK,CNOT9,SCAF11,CLEC16A,PFDN1,NCBP3,PTRHD1,ANAPC10,ACAP1,PSMA6,IRF3,COPS6,PSMA4,MIEN1,PSMA7,NOP10,PSMD9,MRPS24,PSMA3,MRPS10,SEC13,RPL11,WDR48,NUTF2,NEDD1,PLEKHA2,PFDN6,HPS3,CNOT11,INTS12,BORCS7,TUBA1C,AIMP1,PPP1CA,KCMF1,PIH1D1,MKRN2,NFKB1,HSPA6,VBP1,CCDC93,XPO1,RPL37A,COMMD1,NDUFAF3,ZNF143,LSM12,SRSF7,PSMD4,EIF3G,NAA10…
HPA	stomach 1; glandular cells[â‰¥Medium]	HPA:0540052	1.4067e-06	5.8518	6256	79	69	10877	PSMB1,PSMB2,GUK1,EMC7,PSMA1,NUMA1,SRGAP2,VTI1A,SMARCC2,PPM1B,HNRNPK,CNOT9,SCAF11,PFDN1,NCBP3,PTRHD1,ANAPC10,ACAP1,PSMA6,IRF3,COPS6,PSMA4,COMMD10,MIEN1,PSMA7,NOP10,NSMCE1,PSMD9,MRPS24,PSMA3,MRPS10,SEC13,RPL11,WDR48,NUTF2,NEDD1,PLEKHA2,PFDN6,HPS3,CNOT11,INTS12,BORCS7,TUBA1C,AIMP1,PPP1CA,KCMF1,PIH1D1,MKRN2,NFKB1,VBP1,CCDC93,SNX6,ITSN2,XPO1,RPL37A,COMMD1,NDUFAF3,ZNF143,LSM6,LSM12,SRSF7,PSMD4,EIF3G,NA…
HPA	endometrium 2; glandular cells[â‰¥Medium]	HPA:0170052	1.42138e-06	5.84729	4805	79	60	10877	PSMB1,PSMB3,PSMB2,GUK1,PSMA1,NUMA1,SRGAP2,VTI1A,SMARCC2,PPM1B,HNRNPK,CNOT9,SCAF11,CLEC16A,PFDN1,NCBP3,PTRHD1,ANAPC10,ACAP1,PSMA6,IRF3,COPS6,PSMA4,PSMA7,NOP10,PSMD9,MRPS24,MRPS10,RPL11,WDR48,NUTF2,NEDD1,PLEKHA2,PFDN6,HPS3,INTS12,BORCS7,TUBA1C,AIMP1,PPP1CA,KCMF1,PIH1D1,MKRN2,NFKB1,VBP1,CCDC93,XPO1,RPL37A,COMMD1,NDUFAF3,LSM12,SRSF7,PSMD4,EIF3G,RABEPK,CHMP4B,ARPC5L,MRPL55,MRPS18B,TNPO1
HPA	pancreas; exocrine glandular cells[â‰¥Low]	HPA:0350471	1.64822e-06	5.78298	6841	79	72	10877	PSMB1,PSMB3,PSMB2,GUK1,EMC7,PSMA1,NUMA1,SRGAP2,VTI1A,SMARCC2,PPM1B,HNRNPK,CNOT9,SCAF11,CLEC16A,PFDN1,NCBP3,PTRHD1,ANAPC10,ARHGEF6,ACAP1,PSMA6,IRF3,COPS6,PSMA4,COMMD10,MIEN1,PSMA7,NOP10,PSMD9,MRPS24,PSMA3,MRPS10,SEC13,RPL11,WDR48,NUTF2,NEDD1,PLEKHA2,PFDN6,HPS3,CNOT11,INTS12,BORCS7,TUBA1C,AIMP1,PPP1CA,KCMF1,PIH1D1,MKRN2,NFKB1,HSPA6,VBP1,CCDC93,ITSN2,XPO1,RPL37A,COMMD1,NDUFAF3,ZNF143,LSM6,LSM12,SRSF…
HPA	spleen; cells in white pulp[â‰¥Medium]	HPA:0530722	2.2278e-06	5.65212	2684	79	43	10877	PSMB1,PSMB2,PSMA1,NUMA1,SMARCC2,ZBTB8OS,HNRNPK,CNOT9,PFDN1,NCBP3,ACAP1,PSMA6,IRF3,PSMA4,PSMA7,NOP10,PSMD9,MRPS10,RPL11,WDR48,NEDD1,PLEKHA2,PFDN6,HPS3,BORCS7,TUBA1C,ABI3,AIMP1,PPP1CA,PIH1D1,NFKB1,VBP1,XPO1,RPL37A,COMMD1,NDUFAF3,EIF3G,NAA10,LSM14A,CHMP4B,MRPL55,MRPS18B,TNPO1
HPA	lung; macrophages[â‰¥Low]	HPA:0300411	2.45086e-06	5.61068	6690	79	71	10877	PSMB1,PSMB3,PSMB2,GUK1,EMC7,PSMA1,NUMA1,SRGAP2,VTI1A,SMARCC2,ZBTB8OS,PPM1B,HNRNPK,CNOT9,SCAF11,CLEC16A,PFDN1,NCBP3,PTRHD1,ANAPC10,ARHGEF6,ACAP1,PSMA6,IRF3,COPS6,PSMA4,COMMD10,MIEN1,PSMA7,NSMCE1,PSMD9,MRPS24,PSMA3,MRPS10,RPL11,WDR48,NEDD1,PLEKHA2,HPS3,CNOT11,INTS12,BORCS7,TUBA1C,ABI3,AIMP1,PPP1CA,KCMF1,PIH1D1,MKRN2,HSPA6,VBP1,CCDC93,SNX6,XPO1,RPL37A,COMMD1,NDUFAF3,ZNF143,LSM6,LSM12,SRSF7,PSMD4,EIF…
HPA	parathyroid gland	HPA:0360000	3.06528e-06	5.51353	5824	79	66	10877	PSMB1,PSMB3,PSMB2,GUK1,EMC7,PSMA1,NUMA1,SRGAP2,VTI1A,SMARCC2,PPM1B,HNRNPK,CNOT9,SCAF11,CLEC16A,PFDN1,NCBP3,PTRHD1,ANAPC10,ACAP1,PSMA6,IRF3,COPS6,PSMA4,COMMD10,MIEN1,PSMA7,PSMD9,MRPS24,PSMA3,MRPS10,RPL11,WDR48,NUTF2,NEDD1,PLEKHA2,HPS3,CNOT11,INTS12,BORCS7,TUBA1C,AIMP1,PPP1CA,KCMF1,PIH1D1,MKRN2,NFKB1,VBP1,CCDC93,ITSN2,XPO1,RPL37A,COMMD1,NDUFAF3,LSM6,LSM12,SRSF7,PSMD4,EIF3G,NAA10,LSM14A,CHMP4B,ARPC5…
HPA	parathyroid gland; glandular cells[â‰¥Low]	HPA:0360051	3.06528e-06	5.51353	5824	79	66	10877	PSMB1,PSMB3,PSMB2,GUK1,EMC7,PSMA1,NUMA1,SRGAP2,VTI1A,SMARCC2,PPM1B,HNRNPK,CNOT9,SCAF11,CLEC16A,PFDN1,NCBP3,PTRHD1,ANAPC10,ACAP1,PSMA6,IRF3,COPS6,PSMA4,COMMD10,MIEN1,PSMA7,PSMD9,MRPS24,PSMA3,MRPS10,RPL11,WDR48,NUTF2,NEDD1,PLEKHA2,HPS3,CNOT11,INTS12,BORCS7,TUBA1C,AIMP1,PPP1CA,KCMF1,PIH1D1,MKRN2,NFKB1,VBP1,CCDC93,ITSN2,XPO1,RPL37A,COMMD1,NDUFAF3,LSM6,LSM12,SRSF7,PSMD4,EIF3G,NAA10,LSM14A,CHMP4B,ARPC5…
HPA	tonsil; squamous epithelial cells[â‰¥Medium]	HPA:0600222	3.07724e-06	5.51184	4887	79	60	10877	PSMB1,PSMB3,PSMB2,GUK1,PSMA1,NUMA1,VTI1A,SMARCC2,ZBTB8OS,PPM1B,HNRNPK,SCAF11,PFDN1,NCBP3,PTRHD1,ANAPC10,IRF3,COPS6,PSMA4,PSMA7,NOP10,NSMCE1,PSMD9,MRPS10,SEC13,RPL11,WDR48,NEDD1,PLEKHA2,PFDN6,HPS3,CNOT11,INTS12,BORCS7,TUBA1C,ABI3,AIMP1,KCMF1,PIH1D1,MKRN2,NFKB1,HSPA6,VBP1,CCDC93,XPO1,RPL37A,COMMD1,NDUFAF3,LSM6,LSM12,SRSF7,PSMD4,EIF3G,NAA10,LSM14A,TSEN34,RABEPK,MRPL55,MRPS18B,TNPO1
HPA	stomach 1	HPA:0540000	3.09106e-06	5.50989	7553	79	75	10877	PSMB1,PSMB3,PSMB2,GUK1,EMC7,PSMA1,NUMA1,SRGAP2,VTI1A,SMARCC2,PPM1B,HNRNPK,CNOT9,SCAF11,CLEC16A,PFDN1,NCBP3,PTRHD1,ANAPC10,ARHGEF6,ACAP1,PSMA6,IRF3,COPS6,PSMA4,COMMD10,MIEN1,PSMA7,NOP10,NSMCE1,PSMD9,MRPS24,PSMA3,MRPS10,SEC13,RPL11,WDR48,NUTF2,NEDD1,PLEKHA2,PFDN6,HPS3,CNOT11,INTS12,BORCS7,TUBA1C,AIMP1,PPP1CA,KCMF1,PIH1D1,MKRN2,NFKB1,HSPA6,VBP1,CCDC93,SNX6,ITSN2,XPO1,RPL37A,COMMD1,NDUFAF3,ZNF143,LSM…
HPA	stomach 1; glandular cells[â‰¥Low]	HPA:0540051	3.09106e-06	5.50989	7553	79	75	10877	PSMB1,PSMB3,PSMB2,GUK1,EMC7,PSMA1,NUMA1,SRGAP2,VTI1A,SMARCC2,PPM1B,HNRNPK,CNOT9,SCAF11,CLEC16A,PFDN1,NCBP3,PTRHD1,ANAPC10,ARHGEF6,ACAP1,PSMA6,IRF3,COPS6,PSMA4,COMMD10,MIEN1,PSMA7,NOP10,NSMCE1,PSMD9,MRPS24,PSMA3,MRPS10,SEC13,RPL11,WDR48,NUTF2,NEDD1,PLEKHA2,PFDN6,HPS3,CNOT11,INTS12,BORCS7,TUBA1C,AIMP1,PPP1CA,KCMF1,PIH1D1,MKRN2,NFKB1,HSPA6,VBP1,CCDC93,SNX6,ITSN2,XPO1,RPL37A,COMMD1,NDUFAF3,ZNF143,LSM…
HPA	stomach 2; glandular cells[â‰¥Medium]	HPA:0550052	3.76608e-06	5.42411	6189	79	68	10877	PSMB1,PSMB3,PSMB2,GUK1,EMC7,PSMA1,NUMA1,VTI1A,SMARCC2,PPM1B,HNRNPK,CNOT9,SCAF11,PFDN1,NCBP3,PTRHD1,ANAPC10,ACAP1,PSMA6,IRF3,COPS6,PSMA4,COMMD10,MIEN1,PSMA7,NOP10,NSMCE1,PSMD9,MRPS24,PSMA3,MRPS10,SEC13,RPL11,WDR48,NUTF2,NEDD1,PLEKHA2,PFDN6,HPS3,CNOT11,INTS12,BORCS7,TUBA1C,AIMP1,PPP1CA,KCMF1,PIH1D1,MKRN2,VBP1,CCDC93,SNX6,ITSN2,XPO1,RPL37A,COMMD1,NDUFAF3,LSM6,LSM12,SRSF7,EIF3G,NAA10,LSM14A,RABEPK,CH…
HPA	fallopian tube	HPA:0210000	4.03545e-06	5.39411	7359	79	74	10877	PSMB1,PSMB3,PSMB2,GUK1,EMC7,PSMA1,NUMA1,SRGAP2,VTI1A,SMARCC2,ZBTB8OS,PPM1B,HNRNPK,CNOT9,SCAF11,CLEC16A,PFDN1,NCBP3,PTRHD1,ANAPC10,ARHGEF6,PSMA6,IRF3,COPS6,PSMA4,COMMD10,MIEN1,PSMA7,NOP10,NSMCE1,PSMD9,MRPS24,PSMA3,MRPS10,SEC13,RPL11,WDR48,NUTF2,NEDD1,PLEKHA2,PFDN6,HPS3,CNOT11,INTS12,BORCS7,TUBA1C,AIMP1,KCMF1,PIH1D1,MKRN2,NFKB1,HSPA6,VBP1,CCDC93,ITSN2,XPO1,RPL37A,COMMD1,NDUFAF3,ZNF143,LSM6,LSM12,SR…
HPA	tonsil; squamous epithelial cells[â‰¥Low]	HPA:0600221	4.25942e-06	5.37065	6564	79	70	10877	PSMB1,PSMB3,PSMB2,GUK1,EMC7,PSMA1,NUMA1,SRGAP2,VTI1A,SMARCC2,ZBTB8OS,PPM1B,HNRNPK,SCAF11,PFDN1,NCBP3,PTRHD1,ANAPC10,PSMA6,IRF3,COPS6,PSMA4,COMMD10,PSMA7,NOP10,NSMCE1,PSMD9,MRPS24,MRPS10,SEC13,RPL11,WDR48,NUTF2,NEDD1,PLEKHA2,PFDN6,HPS3,CNOT11,INTS12,BORCS7,TUBA1C,ABI3,AIMP1,PPP1CA,KCMF1,PIH1D1,MKRN2,NFKB1,HSPA6,VBP1,CCDC93,ITSN2,XPO1,RPL37A,COMMD1,NDUFAF3,ZNF143,LSM6,LSM12,SRSF7,PSMD4,EIF3G,NAA10,…
HPA	fallopian tube; glandular cells[â‰¥Medium]	HPA:0210052	4.37976e-06	5.35855	5074	79	61	10877	PSMB1,PSMB3,PSMB2,GUK1,EMC7,PSMA1,NUMA1,SRGAP2,VTI1A,SMARCC2,ZBTB8OS,PPM1B,HNRNPK,CNOT9,SCAF11,PFDN1,NCBP3,ANAPC10,PSMA6,IRF3,COPS6,PSMA4,PSMA7,NOP10,PSMD9,MRPS24,PSMA3,MRPS10,RPL11,WDR48,NEDD1,PLEKHA2,PFDN6,HPS3,INTS12,BORCS7,TUBA1C,AIMP1,KCMF1,PIH1D1,NFKB1,HSPA6,VBP1,CCDC93,XPO1,RPL37A,COMMD1,NDUFAF3,ZNF143,LSM6,LSM12,SRSF7,PSMD4,EIF3G,NAA10,LSM14A,RABEPK,ARPC5L,MRPL55,MRPS18B,TNPO1
HPA	caudate; neuronal cells[â‰¥Low]	HPA:0080131	6.83057e-06	5.16554	6084	79	67	10877	PSMB1,PSMB3,PSMB2,GUK1,EMC7,PSMA1,NUMA1,VTI1A,SMARCC2,PPM1B,HNRNPK,CNOT9,SCAF11,CLEC16A,NCBP3,PTRHD1,ACAP1,PSMA6,IRF3,COPS6,PSMA4,COMMD10,PSMA7,NOP10,NSMCE1,PSMD9,MRPS24,MRPS10,SEC13,RPL11,WDR48,NEDD1,PLEKHA2,PFDN6,HPS3,CNOT11,INTS12,BORCS7,TUBA1C,AIMP1,PPP1CA,PIH1D1,MKRN2,NFKB1,HSPA6,VBP1,CCDC93,ITSN2,XPO1,RPL37A,COMMD1,NDUFAF3,ZNF143,LSM6,LSM12,SRSF7,PSMD4,EIF3G,NAA10,LSM14A,TSEN34,RABEPK,CHMP4…
HPA	vagina; squamous epithelial cells[â‰¥Low]	HPA:0620221	7.32566e-06	5.13515	5923	79	66	10877	PSMB1,PSMB3,PSMB2,GUK1,PSMA1,NUMA1,SRGAP2,VTI1A,SMARCC2,ZBTB8OS,PPM1B,HNRNPK,CNOT9,SCAF11,PFDN1,NCBP3,PTRHD1,ANAPC10,PSMA6,IRF3,COPS6,COMMD10,MIEN1,PSMA7,NOP10,NSMCE1,PSMD9,MRPS24,MRPS10,SEC13,RPL11,WDR48,NUTF2,NEDD1,PLEKHA2,PFDN6,HPS3,INTS12,BORCS7,TUBA1C,AIMP1,KCMF1,PIH1D1,MKRN2,NFKB1,HSPA6,CCDC93,ITSN2,XPO1,RPL37A,COMMD1,NDUFAF3,ZNF143,LSM6,LSM12,SRSF7,PSMD4,EIF3G,NAA10,LSM14A,TSEN34,RABEPK,CH…
HPA	vagina	HPA:0620000	7.32566e-06	5.13515	5923	79	66	10877	PSMB1,PSMB3,PSMB2,GUK1,PSMA1,NUMA1,SRGAP2,VTI1A,SMARCC2,ZBTB8OS,PPM1B,HNRNPK,CNOT9,SCAF11,PFDN1,NCBP3,PTRHD1,ANAPC10,PSMA6,IRF3,COPS6,COMMD10,MIEN1,PSMA7,NOP10,NSMCE1,PSMD9,MRPS24,MRPS10,SEC13,RPL11,WDR48,NUTF2,NEDD1,PLEKHA2,PFDN6,HPS3,INTS12,BORCS7,TUBA1C,AIMP1,KCMF1,PIH1D1,MKRN2,NFKB1,HSPA6,CCDC93,ITSN2,XPO1,RPL37A,COMMD1,NDUFAF3,ZNF143,LSM6,LSM12,SRSF7,PSMD4,EIF3G,NAA10,LSM14A,TSEN34,RABEPK,CH…
HPA	spleen; cells in white pulp[â‰¥Low]	HPA:0530721	8.55999e-06	5.06753	4290	79	55	10877	PSMB1,PSMB2,GUK1,EMC7,PSMA1,NUMA1,VTI1A,SMARCC2,ZBTB8OS,PPM1B,HNRNPK,CNOT9,SCAF11,PFDN1,NCBP3,PTRHD1,ACAP1,PSMA6,IRF3,COPS6,PSMA4,PSMA7,NOP10,PSMD9,MRPS24,MRPS10,RPL11,WDR48,NEDD1,PLEKHA2,PFDN6,HPS3,INTS12,BORCS7,TUBA1C,ABI3,AIMP1,PPP1CA,PIH1D1,NFKB1,VBP1,XPO1,RPL37A,COMMD1,NDUFAF3,ZNF143,LSM6,LSM12,EIF3G,NAA10,LSM14A,CHMP4B,MRPL55,MRPS18B,TNPO1
HPA	rectum; glandular cells[â‰¥Medium]	HPA:0400052	9.04208e-06	5.04373	6468	79	69	10877	PSMB1,PSMB3,PSMB2,GUK1,PSMA1,NUMA1,SRGAP2,VTI1A,SMARCC2,PPM1B,HNRNPK,CNOT9,SCAF11,CLEC16A,PFDN1,NCBP3,PTRHD1,ANAPC10,ACAP1,PSMA6,IRF3,COPS6,PSMA4,COMMD10,MIEN1,PSMA7,NOP10,NSMCE1,PSMD9,MRPS24,PSMA3,MRPS10,RPL11,WDR48,NUTF2,NEDD1,PLEKHA2,PFDN6,HPS3,CNOT11,INTS12,BORCS7,TUBA1C,AIMP1,PPP1CA,KCMF1,PIH1D1,MKRN2,NFKB1,VBP1,CCDC93,ITSN2,XPO1,RPL37A,COMMD1,NDUFAF3,LSM6,LSM12,SRSF7,PSMD4,EIF3G,NAA10,LSM14…
HPA	skin 2	HPA:0470000	1.03403e-05	4.98547	6667	79	70	10877	PSMB1,PSMB3,PSMB2,GUK1,EMC7,PSMA1,NUMA1,SRGAP2,VTI1A,SMARCC2,ZBTB8OS,PPM1B,HNRNPK,CNOT9,SCAF11,CLEC16A,PFDN1,NCBP3,PTRHD1,ANAPC10,PSMA6,IRF3,COPS6,PSMA4,COMMD10,PSMA7,NOP10,PSMD9,MRPS24,MRPS10,SEC13,RPL11,WDR48,NUTF2,NEDD1,PLEKHA2,PFDN6,HPS3,CNOT11,INTS12,BORCS7,TUBA1C,ABI3,AIMP1,PPP1CA,KCMF1,PIH1D1,MKRN2,NFKB1,HSPA6,VBP1,ITSN2,XPO1,RPL37A,COMMD1,NDUFAF3,ZNF143,LSM6,LSM12,SRSF7,PSMD4,EIF3G,NAA10,…
HPA	skin 2; epidermal cells[â‰¥Low]	HPA:0470681	1.03403e-05	4.98547	6667	79	70	10877	PSMB1,PSMB3,PSMB2,GUK1,EMC7,PSMA1,NUMA1,SRGAP2,VTI1A,SMARCC2,ZBTB8OS,PPM1B,HNRNPK,CNOT9,SCAF11,CLEC16A,PFDN1,NCBP3,PTRHD1,ANAPC10,PSMA6,IRF3,COPS6,PSMA4,COMMD10,PSMA7,NOP10,PSMD9,MRPS24,MRPS10,SEC13,RPL11,WDR48,NUTF2,NEDD1,PLEKHA2,PFDN6,HPS3,CNOT11,INTS12,BORCS7,TUBA1C,ABI3,AIMP1,PPP1CA,KCMF1,PIH1D1,MKRN2,NFKB1,HSPA6,VBP1,ITSN2,XPO1,RPL37A,COMMD1,NDUFAF3,ZNF143,LSM6,LSM12,SRSF7,PSMD4,EIF3G,NAA10,…
HPA	breast; glandular cells[â‰¥Medium]	HPA:0050052	1.06909e-05	4.97098	5024	79	60	10877	PSMB3,PSMB2,GUK1,PSMA1,NUMA1,SRGAP2,VTI1A,SMARCC2,ZBTB8OS,PPM1B,HNRNPK,SCAF11,CLEC16A,PFDN1,NCBP3,PSMA6,IRF3,COPS6,PSMA7,NOP10,PSMD9,MRPS24,PSMA3,MRPS10,SEC13,RPL11,WDR48,NUTF2,NEDD1,PLEKHA2,PFDN6,HPS3,CNOT11,INTS12,BORCS7,TUBA1C,AIMP1,KCMF1,PIH1D1,NFKB1,VBP1,CCDC93,SNX6,XPO1,RPL37A,COMMD1,NDUFAF3,ZNF143,LSM6,LSM12,SRSF7,EIF3G,NAA10,LSM14A,RABEPK,CHMP4B,ARPC5L,MRPL55,MRPS18B,TNPO1
HPA	fallopian tube; glandular cells[â‰¥Low]	HPA:0210051	1.15397e-05	4.93781	6145	79	67	10877	PSMB1,PSMB3,PSMB2,GUK1,EMC7,PSMA1,NUMA1,SRGAP2,VTI1A,SMARCC2,ZBTB8OS,PPM1B,HNRNPK,CNOT9,SCAF11,PFDN1,NCBP3,ANAPC10,ARHGEF6,PSMA6,IRF3,COPS6,PSMA4,MIEN1,PSMA7,NOP10,NSMCE1,PSMD9,MRPS24,PSMA3,MRPS10,SEC13,RPL11,WDR48,NEDD1,PLEKHA2,PFDN6,HPS3,INTS12,BORCS7,TUBA1C,AIMP1,KCMF1,PIH1D1,MKRN2,NFKB1,HSPA6,VBP1,CCDC93,ITSN2,XPO1,RPL37A,COMMD1,NDUFAF3,ZNF143,LSM6,LSM12,SRSF7,PSMD4,EIF3G,NAA10,LSM14A,RABEPK,…
HPA	stomach 2; glandular cells[â‰¥Low]	HPA:0550051	1.50749e-05	4.82175	7512	79	74	10877	PSMB1,PSMB3,PSMB2,GUK1,EMC7,PSMA1,NUMA1,SRGAP2,VTI1A,SMARCC2,PPM1B,HNRNPK,CNOT9,SCAF11,PFDN1,NCBP3,PTRHD1,ANAPC10,ARHGEF6,ACAP1,PSMA6,IRF3,COPS6,PSMA4,COMMD10,MIEN1,PSMA7,NOP10,NSMCE1,PSMD9,MRPS24,PSMA3,MRPS10,SEC13,RPL11,WDR48,NUTF2,NEDD1,PLEKHA2,PFDN6,HPS3,CNOT11,INTS12,BORCS7,TUBA1C,AIMP1,PPP1CA,KCMF1,PIH1D1,MKRN2,NFKB1,HSPA6,VBP1,CCDC93,SNX6,ITSN2,XPO1,RPL37A,COMMD1,NDUFAF3,ZNF143,LSM6,LSM12,…
HPA	stomach 2	HPA:0550000	1.50749e-05	4.82175	7512	79	74	10877	PSMB1,PSMB3,PSMB2,GUK1,EMC7,PSMA1,NUMA1,SRGAP2,VTI1A,SMARCC2,PPM1B,HNRNPK,CNOT9,SCAF11,PFDN1,NCBP3,PTRHD1,ANAPC10,ARHGEF6,ACAP1,PSMA6,IRF3,COPS6,PSMA4,COMMD10,MIEN1,PSMA7,NOP10,NSMCE1,PSMD9,MRPS24,PSMA3,MRPS10,SEC13,RPL11,WDR48,NUTF2,NEDD1,PLEKHA2,PFDN6,HPS3,CNOT11,INTS12,BORCS7,TUBA1C,AIMP1,PPP1CA,KCMF1,PIH1D1,MKRN2,NFKB1,HSPA6,VBP1,CCDC93,SNX6,ITSN2,XPO1,RPL37A,COMMD1,NDUFAF3,ZNF143,LSM6,LSM12,…
HPA	adrenal gland; glandular cells[â‰¥Low]	HPA:0020051	1.6879e-05	4.77265	7313	79	73	10877	PSMB1,PSMB3,PSMB2,GUK1,EMC7,PSMA1,NUMA1,SRGAP2,VTI1A,SMARCC2,ZBTB8OS,PPM1B,HNRNPK,CNOT9,SCAF11,CLEC16A,PFDN1,NCBP3,PTRHD1,ARHGEF6,ACAP1,PSMA6,IRF3,COPS6,PSMA4,COMMD10,MIEN1,PSMA7,NOP10,PSMD9,MRPS24,PSMA3,MRPS10,SEC13,RPL11,WDR48,NUTF2,NEDD1,PLEKHA2,PFDN6,HPS3,CNOT11,INTS12,BORCS7,TUBA1C,AIMP1,PPP1CA,KCMF1,PIH1D1,MKRN2,NFKB1,HSPA6,VBP1,CCDC93,XPO1,RPL37A,COMMD1,NDUFAF3,ZNF143,LSM6,LSM12,SRSF7,PSMD…
HPA	adrenal gland	HPA:0020000	1.77535e-05	4.75072	7319	79	73	10877	PSMB1,PSMB3,PSMB2,GUK1,EMC7,PSMA1,NUMA1,SRGAP2,VTI1A,SMARCC2,ZBTB8OS,PPM1B,HNRNPK,CNOT9,SCAF11,CLEC16A,PFDN1,NCBP3,PTRHD1,ARHGEF6,ACAP1,PSMA6,IRF3,COPS6,PSMA4,COMMD10,MIEN1,PSMA7,NOP10,PSMD9,MRPS24,PSMA3,MRPS10,SEC13,RPL11,WDR48,NUTF2,NEDD1,PLEKHA2,PFDN6,HPS3,CNOT11,INTS12,BORCS7,TUBA1C,AIMP1,PPP1CA,KCMF1,PIH1D1,MKRN2,NFKB1,HSPA6,VBP1,CCDC93,XPO1,RPL37A,COMMD1,NDUFAF3,ZNF143,LSM6,LSM12,SRSF7,PSMD…
HPA	kidney; cells in glomeruli[â‰¥Low]	HPA:0270351	1.81289e-05	4.74163	5084	79	60	10877	PSMB1,PSMB2,GUK1,EMC7,PSMA1,NUMA1,VTI1A,SMARCC2,ZBTB8OS,PPM1B,HNRNPK,SCAF11,PFDN1,NCBP3,PTRHD1,ANAPC10,ARHGEF6,ACAP1,PSMA6,COPS6,COMMD10,PSMA7,NSMCE1,PSMD9,MRPS10,WDR48,NUTF2,NEDD1,PFDN6,HPS3,INTS12,BORCS7,TUBA1C,AIMP1,PPP1CA,KCMF1,PIH1D1,MKRN2,NFKB1,HSPA6,VBP1,CCDC93,SNX6,XPO1,RPL37A,NDUFAF3,ZNF143,LSM6,LSM12,SRSF7,PSMD4,EIF3G,NAA10,LSM14A,TSEN34,CHMP4B,ARPC5L,MRPL55,MRPS18B,TNPO1
HPA	kidney; cells in tubules[â‰¥Medium]	HPA:0270362	1.8283e-05	4.73795	6373	79	68	10877	PSMB1,PSMB3,PSMB2,GUK1,EMC7,PSMA1,NUMA1,SRGAP2,VTI1A,SMARCC2,ZBTB8OS,PPM1B,HNRNPK,CNOT9,SCAF11,CLEC16A,NCBP3,PTRHD1,ANAPC10,ACAP1,PSMA6,IRF3,COPS6,PSMA4,COMMD10,MIEN1,PSMA7,NOP10,PSMD9,MRPS24,PSMA3,MRPS10,WDR48,NUTF2,NEDD1,PLEKHA2,PFDN6,HPS3,CNOT11,INTS12,BORCS7,TUBA1C,AIMP1,PPP1CA,KCMF1,PIH1D1,MKRN2,HSPA6,VBP1,CCDC93,SNX6,ITSN2,XPO1,RPL37A,COMMD1,NDUFAF3,LSM6,LSM12,SRSF7,PSMD4,EIF3G,TSEN34,RABEP…
HPA	rectum; glandular cells[â‰¥Low]	HPA:0400051	2.16746e-05	4.66405	7555	79	74	10877	PSMB1,PSMB3,PSMB2,GUK1,EMC7,PSMA1,NUMA1,SRGAP2,VTI1A,SMARCC2,PPM1B,HNRNPK,CNOT9,SCAF11,CLEC16A,PFDN1,NCBP3,PTRHD1,ANAPC10,ARHGEF6,ACAP1,PSMA6,IRF3,COPS6,PSMA4,COMMD10,MIEN1,PSMA7,NOP10,NSMCE1,PSMD9,MRPS24,PSMA3,MRPS10,RPL11,WDR48,NUTF2,NEDD1,PLEKHA2,PFDN6,HPS3,CNOT11,INTS12,BORCS7,TUBA1C,AIMP1,PPP1CA,KCMF1,PIH1D1,MKRN2,NFKB1,HSPA6,VBP1,CCDC93,SNX6,ITSN2,XPO1,RPL37A,COMMD1,NDUFAF3,LSM6,LSM12,SRSF7…
HPA	rectum	HPA:0400000	2.16746e-05	4.66405	7555	79	74	10877	PSMB1,PSMB3,PSMB2,GUK1,EMC7,PSMA1,NUMA1,SRGAP2,VTI1A,SMARCC2,PPM1B,HNRNPK,CNOT9,SCAF11,CLEC16A,PFDN1,NCBP3,PTRHD1,ANAPC10,ARHGEF6,ACAP1,PSMA6,IRF3,COPS6,PSMA4,COMMD10,MIEN1,PSMA7,NOP10,NSMCE1,PSMD9,MRPS24,PSMA3,MRPS10,RPL11,WDR48,NUTF2,NEDD1,PLEKHA2,PFDN6,HPS3,CNOT11,INTS12,BORCS7,TUBA1C,AIMP1,PPP1CA,KCMF1,PIH1D1,MKRN2,NFKB1,HSPA6,VBP1,CCDC93,SNX6,ITSN2,XPO1,RPL37A,COMMD1,NDUFAF3,LSM6,LSM12,SRSF7…
HPA	gallbladder	HPA:0220000	2.26047e-05	4.6458	7560	79	74	10877	PSMB1,PSMB3,PSMB2,GUK1,EMC7,PSMA1,NUMA1,SRGAP2,VTI1A,SMARCC2,ZBTB8OS,PPM1B,HNRNPK,CNOT9,SCAF11,CLEC16A,PFDN1,NCBP3,PTRHD1,ANAPC10,ACAP1,PSMA6,IRF3,COPS6,PSMA4,COMMD10,MIEN1,PSMA7,NOP10,NSMCE1,PSMD9,MRPS24,PSMA3,MRPS10,SEC13,RPL11,WDR48,NUTF2,NEDD1,PLEKHA2,PFDN6,HPS3,CNOT11,INTS12,BORCS7,TUBA1C,AIMP1,PPP1CA,KCMF1,PIH1D1,MKRN2,NFKB1,HSPA6,CCDC93,ITSN2,XPO1,RPL37A,COMMD1,NDUFAF3,ZNF143,LSM6,LSM12,SR…
HPA	gallbladder; glandular cells[â‰¥Low]	HPA:0220051	2.26047e-05	4.6458	7560	79	74	10877	PSMB1,PSMB3,PSMB2,GUK1,EMC7,PSMA1,NUMA1,SRGAP2,VTI1A,SMARCC2,ZBTB8OS,PPM1B,HNRNPK,CNOT9,SCAF11,CLEC16A,PFDN1,NCBP3,PTRHD1,ANAPC10,ACAP1,PSMA6,IRF3,COPS6,PSMA4,COMMD10,MIEN1,PSMA7,NOP10,NSMCE1,PSMD9,MRPS24,PSMA3,MRPS10,SEC13,RPL11,WDR48,NUTF2,NEDD1,PLEKHA2,PFDN6,HPS3,CNOT11,INTS12,BORCS7,TUBA1C,AIMP1,PPP1CA,KCMF1,PIH1D1,MKRN2,NFKB1,HSPA6,CCDC93,ITSN2,XPO1,RPL37A,COMMD1,NDUFAF3,ZNF143,LSM6,LSM12,SR…
HPA	prostate	HPA:0390000	2.4429e-05	4.61209	6586	79	69	10877	PSMB1,PSMB3,PSMB2,GUK1,EMC7,PSMA1,NUMA1,SRGAP2,VTI1A,SMARCC2,ZBTB8OS,PPM1B,HNRNPK,CNOT9,SCAF11,CLEC16A,PFDN1,NCBP3,ANAPC10,PSMA6,IRF3,COPS6,PSMA4,MIEN1,PSMA7,NSMCE1,PSMD9,MRPS24,PSMA3,MRPS10,SEC13,RPL11,WDR48,NEDD1,PLEKHA2,PFDN6,HPS3,CNOT11,INTS12,BORCS7,TUBA1C,AIMP1,KCMF1,PIH1D1,MKRN2,NFKB1,HSPA6,VBP1,CCDC93,SNX6,ITSN2,XPO1,RPL37A,COMMD1,NDUFAF3,ZNF143,LSM6,LSM12,SRSF7,PSMD4,EIF3G,NAA10,LSM14A,R…
HPA	prostate; glandular cells[â‰¥Low]	HPA:0390051	2.4429e-05	4.61209	6586	79	69	10877	PSMB1,PSMB3,PSMB2,GUK1,EMC7,PSMA1,NUMA1,SRGAP2,VTI1A,SMARCC2,ZBTB8OS,PPM1B,HNRNPK,CNOT9,SCAF11,CLEC16A,PFDN1,NCBP3,ANAPC10,PSMA6,IRF3,COPS6,PSMA4,MIEN1,PSMA7,NSMCE1,PSMD9,MRPS24,PSMA3,MRPS10,SEC13,RPL11,WDR48,NEDD1,PLEKHA2,PFDN6,HPS3,CNOT11,INTS12,BORCS7,TUBA1C,AIMP1,KCMF1,PIH1D1,MKRN2,NFKB1,HSPA6,VBP1,CCDC93,SNX6,ITSN2,XPO1,RPL37A,COMMD1,NDUFAF3,ZNF143,LSM6,LSM12,SRSF7,PSMD4,EIF3G,NAA10,LSM14A,R…
HPA	tonsil; germinal center cells[â‰¥Low]	HPA:0600431	2.44913e-05	4.61099	5899	79	65	10877	PSMB1,PSMB3,PSMB2,GUK1,EMC7,PSMA1,NUMA1,VTI1A,SMARCC2,ZBTB8OS,PPM1B,HNRNPK,SCAF11,PFDN1,NCBP3,ANAPC10,ARHGEF6,ACAP1,PSMA6,IRF3,COPS6,PSMA4,MIEN1,PSMA7,PSMD9,MRPS24,MRPS10,WDR48,NUTF2,NEDD1,PLEKHA2,PFDN6,HPS3,CNOT11,INTS12,TUBA1C,ABI3,AIMP1,PPP1CA,KCMF1,PIH1D1,MKRN2,NFKB1,VBP1,ITSN2,XPO1,RPL37A,COMMD1,NDUFAF3,ZNF143,LSM6,LSM12,SRSF7,PSMD4,EIF3G,NAA10,LSM14A,TSEN34,RABEPK,CHMP4B,ARPC5L,MRPL55,ARID3…
HPA	lymph node; germinal center cells[â‰¥Low]	HPA:0310431	2.91013e-05	4.53609	4991	79	59	10877	PSMB1,PSMB2,GUK1,EMC7,PSMA1,NUMA1,VTI1A,SMARCC2,ZBTB8OS,PPM1B,HNRNPK,SCAF11,PFDN1,NCBP3,PTRHD1,ANAPC10,ACAP1,PSMA6,IRF3,COPS6,PSMA4,COMMD10,PSMA7,NOP10,NSMCE1,PSMD9,MRPS10,RPL11,WDR48,NUTF2,NEDD1,PFDN6,BORCS7,TUBA1C,ABI3,AIMP1,KCMF1,PIH1D1,MKRN2,NFKB1,HSPA6,VBP1,XPO1,RPL37A,COMMD1,NDUFAF3,ZNF143,LSM6,LSM12,SRSF7,PSMD4,EIF3G,NAA10,LSM14A,RABEPK,CHMP4B,MRPL55,MRPS18B,TNPO1
HPA	seminal vesicle; glandular cells[â‰¥Medium]	HPA:0430052	3.17541e-05	4.4982	5149	79	60	10877	PSMB1,PSMB3,PSMB2,GUK1,EMC7,PSMA1,NUMA1,SRGAP2,VTI1A,SMARCC2,PPM1B,HNRNPK,SCAF11,CLEC16A,PFDN1,NCBP3,ANAPC10,PSMA6,IRF3,COPS6,PSMA7,NOP10,PSMD9,MRPS24,PSMA3,MRPS10,RPL11,WDR48,NEDD1,PLEKHA2,PFDN6,HPS3,CNOT11,INTS12,BORCS7,TUBA1C,AIMP1,PPP1CA,KCMF1,PIH1D1,MKRN2,NFKB1,VBP1,CCDC93,XPO1,RPL37A,COMMD1,NDUFAF3,LSM6,LSM12,SRSF7,EIF3G,NAA10,LSM14A,TSEN34,RABEPK,ARPC5L,MRPL55,MRPS18B,TNPO1
HPA	lymph node; non-germinal center cells[â‰¥Low]	HPA:0310441	4.37707e-05	4.35882	5969	79	65	10877	PSMB1,PSMB2,GUK1,EMC7,PSMA1,NUMA1,SRGAP2,VTI1A,SMARCC2,ZBTB8OS,PPM1B,HNRNPK,CNOT9,SCAF11,PFDN1,NCBP3,PTRHD1,ANAPC10,ARHGEF6,ACAP1,PSMA6,IRF3,COPS6,PSMA4,PSMA7,NOP10,PSMD9,MRPS24,MRPS10,RPL11,WDR48,NEDD1,PLEKHA2,PFDN6,HPS3,INTS12,BORCS7,TUBA1C,ABI3,AIMP1,KCMF1,PIH1D1,MKRN2,NFKB1,VBP1,CCDC93,SNX6,XPO1,RPL37A,COMMD1,NDUFAF3,ZNF143,LSM6,LSM12,SRSF7,EIF3G,NAA10,LSM14A,TSEN34,RABEPK,CHMP4B,MRPL55,ARID3…
HPA	ovary	HPA:0340000	4.77636e-05	4.3209	5348	79	61	10877	PSMB1,PSMB3,GUK1,EMC7,PSMA1,NUMA1,SRGAP2,VTI1A,SMARCC2,ZBTB8OS,PPM1B,HNRNPK,CNOT9,SCAF11,PFDN1,NCBP3,PTRHD1,IRF3,COPS6,COMMD10,MIEN1,PSMA7,NOP10,PSMD9,MRPS24,MRPS10,WDR48,NUTF2,NEDD1,PLEKHA2,PFDN6,HPS3,CNOT11,INTS12,BORCS7,TUBA1C,AIMP1,PPP1CA,KCMF1,PIH1D1,MKRN2,NFKB1,HSPA6,VBP1,CCDC93,XPO1,RPL37A,NDUFAF3,ZNF143,LSM6,LSM12,SRSF7,EIF3G,NAA10,LSM14A,TSEN34,RABEPK,CHMP4B,MRPL55,MRPS18B,TNPO1
HPA	pancreas; pancreatic endocrine cells[â‰¥Low]	HPA:0351181	6.56317e-05	4.18289	5540	79	62	10877	PSMB1,PSMB3,PSMB2,GUK1,EMC7,PSMA1,NUMA1,VTI1A,SMARCC2,PPM1B,HNRNPK,CNOT9,CLEC16A,PTRHD1,ACAP1,PSMA6,IRF3,COPS6,PSMA4,MIEN1,PSMA7,NOP10,NSMCE1,PSMD9,MRPS24,PSMA3,MRPS10,SEC13,RPL11,WDR48,NUTF2,NEDD1,PLEKHA2,PFDN6,HPS3,CNOT11,INTS12,BORCS7,TUBA1C,AIMP1,KCMF1,PIH1D1,MKRN2,VBP1,CCDC93,XPO1,RPL37A,COMMD1,NDUFAF3,ZNF143,LSM6,LSM12,SRSF7,PSMD4,EIF3G,LSM14A,TSEN34,RABEPK,CHMP4B,MRPL55,MRPS18B,TNPO1
HPA	tonsil; non-germinal center cells[â‰¥Low]	HPA:0600441	6.74152e-05	4.17124	6022	79	65	10877	PSMB1,PSMB3,PSMB2,EMC7,PSMA1,NUMA1,VTI1A,SMARCC2,ZBTB8OS,PPM1B,HNRNPK,CNOT9,SCAF11,PFDN1,NCBP3,PTRHD1,ARHGEF6,ACAP1,PSMA6,IRF3,COPS6,PSMA4,MIEN1,PSMA7,NOP10,PSMD9,MRPS24,MRPS10,RPL11,WDR48,NEDD1,PLEKHA2,PFDN6,HPS3,CNOT11,INTS12,BORCS7,TUBA1C,ABI3,AIMP1,PPP1CA,KCMF1,PIH1D1,MKRN2,NFKB1,VBP1,XPO1,RPL37A,COMMD1,NDUFAF3,ZNF143,LSM6,LSM12,SRSF7,PSMD4,EIF3G,NAA10,LSM14A,TSEN34,RABEPK,CHMP4B,MRPL55,ARID3…
HPA	nasopharynx	HPA:0320000	7.33806e-05	4.13442	7093	79	71	10877	PSMB1,PSMB3,PSMB2,GUK1,EMC7,PSMA1,NUMA1,SRGAP2,VTI1A,SMARCC2,ZBTB8OS,PPM1B,HNRNPK,CNOT9,SCAF11,CLEC16A,PFDN1,NCBP3,PTRHD1,ANAPC10,ARHGEF6,ACAP1,PSMA6,IRF3,COPS6,PSMA4,COMMD10,NOP10,NSMCE1,PSMD9,PSMA3,MRPS10,RPL11,WDR48,NUTF2,NEDD1,PLEKHA2,PFDN6,HPS3,CNOT11,INTS12,BORCS7,TUBA1C,AIMP1,PPP1CA,KCMF1,PIH1D1,MKRN2,NFKB1,HSPA6,VBP1,CCDC93,ITSN2,XPO1,RPL37A,COMMD1,NDUFAF3,ZNF143,LSM6,LSM12,SRSF7,EIF3G,NA…
HPA	kidney; cells in tubules[â‰¥Low]	HPA:0270361	7.81585e-05	4.10702	7710	79	74	10877	PSMB1,PSMB3,PSMB2,GUK1,EMC7,PSMA1,NUMA1,SRGAP2,VTI1A,SMARCC2,ZBTB8OS,PPM1B,HNRNPK,CNOT9,SCAF11,CLEC16A,NCBP3,PTRHD1,ANAPC10,ARHGEF6,ACAP1,PSMA6,IRF3,COPS6,PSMA4,COMMD10,MIEN1,PSMA7,NOP10,NSMCE1,PSMD9,MRPS24,PSMA3,MRPS10,WDR48,NUTF2,NEDD1,PLEKHA2,PFDN6,HPS3,CNOT11,INTS12,BORCS7,TUBA1C,AIMP1,PPP1CA,KCMF1,PIH1D1,MKRN2,NFKB1,HSPA6,VBP1,CCDC93,SNX6,ITSN2,XPO1,RPL37A,COMMD1,NDUFAF3,ZNF143,LSM6,LSM12,SR…
HPA	bronchus	HPA:0060000	0.000105958	3.97487	7334	79	72	10877	PSMB1,PSMB3,PSMB2,GUK1,EMC7,PSMA1,NUMA1,SRGAP2,VTI1A,SMARCC2,ZBTB8OS,PPM1B,HNRNPK,SCAF11,CLEC16A,PFDN1,NCBP3,PTRHD1,ANAPC10,ARHGEF6,ACAP1,PSMA6,IRF3,COPS6,PSMA4,COMMD10,PSMA7,NOP10,NSMCE1,MRPS24,PSMA3,MRPS10,SEC13,RPL11,WDR48,NUTF2,NEDD1,PLEKHA2,HPS3,CNOT11,INTS12,BORCS7,TUBA1C,AIMP1,PPP1CA,KCMF1,PIH1D1,MKRN2,NFKB1,HSPA6,VBP1,CCDC93,ITSN2,XPO1,RPL37A,COMMD1,NDUFAF3,ZNF143,LSM6,LSM12,SRSF7,PSMD4,E…
HPA	tonsil; germinal center cells[â‰¥Medium]	HPA:0600432	0.000109917	3.95894	4037	79	51	10877	PSMB1,PSMB3,PSMB2,GUK1,PSMA1,NUMA1,VTI1A,SMARCC2,PPM1B,HNRNPK,SCAF11,PFDN1,NCBP3,ACAP1,IRF3,PSMA4,PSMA7,PSMD9,MRPS24,MRPS10,WDR48,NUTF2,NEDD1,PLEKHA2,PFDN6,HPS3,CNOT11,INTS12,TUBA1C,ABI3,AIMP1,PPP1CA,PIH1D1,NFKB1,VBP1,XPO1,RPL37A,NDUFAF3,ZNF143,LSM6,LSM12,SRSF7,PSMD4,EIF3G,NAA10,LSM14A,RABEPK,MRPL55,ARID3A,MRPS18B,TNPO1
HPA	oral mucosa; squamous epithelial cells[â‰¥Medium]	HPA:0330222	0.000109935	3.95887	4303	79	53	10877	PSMB1,PSMB3,PSMB2,GUK1,PSMA1,NUMA1,VTI1A,SMARCC2,ZBTB8OS,PPM1B,HNRNPK,SCAF11,PFDN1,NCBP3,PTRHD1,ANAPC10,IRF3,COPS6,COMMD10,PSMA7,NOP10,PSMD9,MRPS24,MRPS10,RPL11,NUTF2,NEDD1,PLEKHA2,PFDN6,HPS3,INTS12,BORCS7,TUBA1C,AIMP1,PPP1CA,KCMF1,PIH1D1,MKRN2,HSPA6,ITSN2,XPO1,NDUFAF3,LSM6,LSM12,SRSF7,PSMD4,EIF3G,NAA10,LSM14A,TSEN34,MRPL55,MRPS18B,TNPO1
HPA	breast; myoepithelial cells[â‰¥Low]	HPA:0050091	0.000113005	3.9469	5607	79	62	10877	PSMB1,PSMB3,PSMB2,GUK1,EMC7,PSMA1,NUMA1,SMARCC2,ZBTB8OS,HNRNPK,SCAF11,NCBP3,ARHGEF6,PSMA6,IRF3,COPS6,PSMA4,MIEN1,PSMA7,NSMCE1,PSMD9,MRPS24,PSMA3,MRPS10,SEC13,RPL11,WDR48,NUTF2,NEDD1,PLEKHA2,PFDN6,HPS3,INTS12,BORCS7,TUBA1C,ABI3,AIMP1,KCMF1,PIH1D1,MKRN2,NFKB1,HSPA6,VBP1,CCDC93,SNX6,XPO1,COMMD1,NDUFAF3,ZNF143,LSM6,LSM12,SRSF7,PSMD4,EIF3G,NAA10,LSM14A,TSEN34,RABEPK,CHMP4B,ARPC5L,MRPS18B,TNPO1
HPA	skin 1; keratinocytes[â‰¥Low]	HPA:0460661	0.000132929	3.87638	6107	79	65	10877	PSMB1,PSMB3,PSMB2,GUK1,PSMA1,NUMA1,SRGAP2,VTI1A,SMARCC2,ZBTB8OS,PPM1B,HNRNPK,SCAF11,CLEC16A,NCBP3,PTRHD1,ANAPC10,ACAP1,PSMA6,IRF3,COPS6,COMMD10,MIEN1,PSMA7,NOP10,PSMD9,MRPS24,PSMA3,MRPS10,SEC13,RPL11,WDR48,NUTF2,NEDD1,PFDN6,HPS3,INTS12,BORCS7,TUBA1C,AIMP1,PPP1CA,KCMF1,PIH1D1,MKRN2,NFKB1,HSPA6,VBP1,ITSN2,XPO1,RPL37A,COMMD1,NDUFAF3,ZNF143,LSM6,LSM12,SRSF7,PSMD4,EIF3G,NAA10,LSM14A,TSEN34,CHMP4B,MRPL…
HPA	kidney	HPA:0270000	0.000138087	3.85985	8002	79	75	10877	PSMB1,PSMB3,PSMB2,GUK1,EMC7,PSMA1,NUMA1,SRGAP2,VTI1A,SMARCC2,ZBTB8OS,PPM1B,HNRNPK,CNOT9,SCAF11,CLEC16A,PFDN1,NCBP3,PTRHD1,ANAPC10,ARHGEF6,ACAP1,PSMA6,IRF3,COPS6,PSMA4,COMMD10,MIEN1,PSMA7,NOP10,NSMCE1,PSMD9,MRPS24,PSMA3,MRPS10,WDR48,NUTF2,NEDD1,PLEKHA2,PFDN6,HPS3,CNOT11,INTS12,BORCS7,TUBA1C,AIMP1,PPP1CA,KCMF1,PIH1D1,MKRN2,NFKB1,HSPA6,VBP1,CCDC93,SNX6,ITSN2,XPO1,RPL37A,COMMD1,NDUFAF3,ZNF143,LSM6,LS…
HPA	salivary gland	HPA:0420000	0.000139727	3.85472	6802	79	69	10877	PSMB1,PSMB3,PSMB2,GUK1,PSMA1,NUMA1,SRGAP2,VTI1A,SMARCC2,ZBTB8OS,PPM1B,HNRNPK,CNOT9,SCAF11,CLEC16A,PFDN1,NCBP3,PTRHD1,ANAPC10,ACAP1,PSMA6,IRF3,COPS6,PSMA4,MIEN1,PSMA7,NOP10,NSMCE1,PSMD9,MRPS24,PSMA3,MRPS10,SEC13,RPL11,WDR48,NUTF2,NEDD1,PLEKHA2,PFDN6,HPS3,INTS12,BORCS7,TUBA1C,AIMP1,KCMF1,PIH1D1,MKRN2,NFKB1,HSPA6,CCDC93,SNX6,XPO1,RPL37A,COMMD1,NDUFAF3,ZNF143,LSM6,LSM12,SRSF7,PSMD4,EIF3G,NAA10,LSM14A…
HPA	salivary gland; glandular cells[â‰¥Low]	HPA:0420051	0.000139727	3.85472	6802	79	69	10877	PSMB1,PSMB3,PSMB2,GUK1,PSMA1,NUMA1,SRGAP2,VTI1A,SMARCC2,ZBTB8OS,PPM1B,HNRNPK,CNOT9,SCAF11,CLEC16A,PFDN1,NCBP3,PTRHD1,ANAPC10,ACAP1,PSMA6,IRF3,COPS6,PSMA4,MIEN1,PSMA7,NOP10,NSMCE1,PSMD9,MRPS24,PSMA3,MRPS10,SEC13,RPL11,WDR48,NUTF2,NEDD1,PLEKHA2,PFDN6,HPS3,INTS12,BORCS7,TUBA1C,AIMP1,KCMF1,PIH1D1,MKRN2,NFKB1,HSPA6,CCDC93,SNX6,XPO1,RPL37A,COMMD1,NDUFAF3,ZNF143,LSM6,LSM12,SRSF7,PSMD4,EIF3G,NAA10,LSM14A…
HPA	cerebral cortex	HPA:0100000	0.000141482	3.8493	8005	79	75	10877	PSMB1,PSMB3,PSMB2,GUK1,EMC7,PSMA1,NUMA1,SRGAP2,VTI1A,SMARCC2,ZBTB8OS,PPM1B,HNRNPK,CNOT9,SCAF11,CLEC16A,PFDN1,NCBP3,ANAPC10,ACAP1,PSMA6,IRF3,COPS6,PSMA4,COMMD10,PSMA7,NOP10,NSMCE1,PSMD9,MRPS24,PSMA3,MRPS10,SEC13,RPL11,WDR48,NUTF2,NEDD1,PLEKHA2,PFDN6,HPS3,CNOT11,INTS12,BORCS7,TUBA1C,ABI3,AIMP1,PPP1CA,KCMF1,PIH1D1,MKRN2,NFKB1,HSPA6,VBP1,CCDC93,ITSN2,XPO1,RPL37A,COMMD1,NDUFAF3,ZNF143,LSM6,LSM12,SRSF7…
HPA	placenta	HPA:0380000	0.000158815	3.79911	7385	79	72	10877	PSMB1,PSMB3,PSMB2,GUK1,EMC7,PSMA1,NUMA1,VTI1A,SMARCC2,ZBTB8OS,PPM1B,HNRNPK,CNOT9,SCAF11,CLEC16A,PFDN1,NCBP3,PTRHD1,ACAP1,PSMA6,IRF3,COPS6,PSMA4,COMMD10,MIEN1,PSMA7,PSMD9,MRPS24,PSMA3,MRPS10,SEC13,RPL11,WDR48,NUTF2,NEDD1,PLEKHA2,PFDN6,HPS3,CNOT11,INTS12,BORCS7,TUBA1C,AIMP1,PPP1CA,KCMF1,PIH1D1,MKRN2,NFKB1,HSPA6,VBP1,CCDC93,ITSN2,XPO1,RPL37A,COMMD1,NDUFAF3,ZNF143,LSM6,LSM12,SRSF7,PSMD4,EIF3G,NAA10,L…
HPA	cervix, uterine	HPA:0110000	0.000182261	3.73931	6836	79	69	10877	PSMB1,PSMB3,PSMB2,GUK1,EMC7,PSMA1,NUMA1,SRGAP2,VTI1A,SMARCC2,PPM1B,HNRNPK,CNOT9,SCAF11,CLEC16A,PFDN1,NCBP3,PTRHD1,ANAPC10,PSMA6,IRF3,COPS6,PSMA4,COMMD10,PSMA7,NOP10,PSMD9,MRPS24,PSMA3,MRPS10,SEC13,RPL11,WDR48,NUTF2,NEDD1,PLEKHA2,PFDN6,HPS3,CNOT11,INTS12,BORCS7,TUBA1C,AIMP1,PPP1CA,KCMF1,PIH1D1,MKRN2,NFKB1,HSPA6,VBP1,CCDC93,SNX6,XPO1,RPL37A,COMMD1,NDUFAF3,LSM6,LSM12,SRSF7,PSMD4,EIF3G,NAA10,LSM14A,T…
HPA	endometrium 1; glandular cells[â‰¥Medium]	HPA:0160052	0.000183842	3.73555	5066	79	58	10877	PSMB1,PSMB3,PSMB2,GUK1,EMC7,PSMA1,NUMA1,SRGAP2,VTI1A,SMARCC2,ZBTB8OS,PPM1B,HNRNPK,CNOT9,PFDN1,PTRHD1,ANAPC10,ACAP1,PSMA6,IRF3,PSMA4,PSMA7,NOP10,PSMD9,PSMA3,MRPS10,RPL11,WDR48,NEDD1,PLEKHA2,HPS3,CNOT11,INTS12,BORCS7,TUBA1C,AIMP1,KCMF1,MKRN2,HSPA6,VBP1,CCDC93,ITSN2,XPO1,RPL37A,COMMD1,NDUFAF3,ZNF143,LSM6,LSM12,PSMD4,EIF3G,NAA10,LSM14A,RABEPK,CHMP4B,MRPL55,MRPS18B,TNPO1
HPA	skin 2; epidermal cells[â‰¥Medium]	HPA:0470682	0.00019651	3.70661	4787	79	56	10877	PSMB1,PSMB3,PSMB2,GUK1,PSMA1,NUMA1,SRGAP2,VTI1A,SMARCC2,ZBTB8OS,HNRNPK,SCAF11,NCBP3,PTRHD1,ANAPC10,PSMA6,IRF3,COPS6,PSMA4,PSMA7,NOP10,PSMD9,MRPS10,SEC13,RPL11,NEDD1,PFDN6,HPS3,INTS12,BORCS7,TUBA1C,AIMP1,PPP1CA,KCMF1,PIH1D1,NFKB1,HSPA6,ITSN2,XPO1,RPL37A,COMMD1,NDUFAF3,ZNF143,LSM6,LSM12,SRSF7,PSMD4,EIF3G,NAA10,LSM14A,TSEN34,RABEPK,CHMP4B,MRPL55,MRPS18B,TNPO1
HPA	epididymis; glandular cells[â‰¥Low]	HPA:0180051	0.000220265	3.65705	7232	79	71	10877	PSMB1,PSMB3,PSMB2,GUK1,EMC7,PSMA1,NUMA1,SRGAP2,VTI1A,SMARCC2,ZBTB8OS,PPM1B,HNRNPK,CNOT9,SCAF11,CLEC16A,PFDN1,NCBP3,PTRHD1,ANAPC10,PSMA6,IRF3,COPS6,PSMA4,COMMD10,MIEN1,PSMA7,NOP10,PSMD9,MRPS24,PSMA3,MRPS10,SEC13,RPL11,WDR48,NUTF2,NEDD1,PLEKHA2,PFDN6,HPS3,CNOT11,INTS12,BORCS7,TUBA1C,AIMP1,PPP1CA,KCMF1,PIH1D1,MKRN2,NFKB1,HSPA6,VBP1,CCDC93,SNX6,XPO1,RPL37A,NDUFAF3,ZNF143,LSM6,LSM12,SRSF7,PSMD4,EIF3G,…
HPA	epididymis	HPA:0180000	0.000220265	3.65705	7232	79	71	10877	PSMB1,PSMB3,PSMB2,GUK1,EMC7,PSMA1,NUMA1,SRGAP2,VTI1A,SMARCC2,ZBTB8OS,PPM1B,HNRNPK,CNOT9,SCAF11,CLEC16A,PFDN1,NCBP3,PTRHD1,ANAPC10,PSMA6,IRF3,COPS6,PSMA4,COMMD10,MIEN1,PSMA7,NOP10,PSMD9,MRPS24,PSMA3,MRPS10,SEC13,RPL11,WDR48,NUTF2,NEDD1,PLEKHA2,PFDN6,HPS3,CNOT11,INTS12,BORCS7,TUBA1C,AIMP1,PPP1CA,KCMF1,PIH1D1,MKRN2,NFKB1,HSPA6,VBP1,CCDC93,SNX6,XPO1,RPL37A,NDUFAF3,ZNF143,LSM6,LSM12,SRSF7,PSMD4,EIF3G,…
HPA	small intestine; glandular cells[â‰¥Medium]	HPA:0480052	0.000234023	3.63074	6516	79	67	10877	PSMB1,PSMB3,PSMB2,GUK1,EMC7,PSMA1,NUMA1,VTI1A,SMARCC2,PPM1B,HNRNPK,CNOT9,SCAF11,PFDN1,NCBP3,PTRHD1,ANAPC10,ACAP1,PSMA6,IRF3,COPS6,PSMA4,PSMA7,NOP10,NSMCE1,PSMD9,MRPS24,PSMA3,MRPS10,SEC13,RPL11,WDR48,NEDD1,PLEKHA2,PFDN6,HPS3,CNOT11,INTS12,BORCS7,TUBA1C,AIMP1,PPP1CA,KCMF1,PIH1D1,MKRN2,NFKB1,VBP1,CCDC93,SNX6,XPO1,RPL37A,COMMD1,NDUFAF3,ZNF143,LSM6,LSM12,SRSF7,PSMD4,EIF3G,NAA10,LSM14A,RABEPK,CHMP4B,AR…
HPA	tonsil; non-germinal center cells[â‰¥Medium]	HPA:0600442	0.000236706	3.62579	4126	79	51	10877	PSMB1,PSMB3,PSMB2,PSMA1,NUMA1,VTI1A,SMARCC2,ZBTB8OS,PPM1B,HNRNPK,SCAF11,PFDN1,NCBP3,PTRHD1,ARHGEF6,ACAP1,IRF3,COPS6,PSMA4,PSMA7,PSMD9,MRPS24,MRPS10,WDR48,NEDD1,PLEKHA2,PFDN6,HPS3,INTS12,BORCS7,TUBA1C,ABI3,AIMP1,PPP1CA,PIH1D1,NFKB1,VBP1,XPO1,RPL37A,COMMD1,NDUFAF3,ZNF143,LSM6,LSM12,EIF3G,LSM14A,RABEPK,MRPL55,ARID3A,MRPS18B,TNPO1
HPA	skin 1; Langerhans[â‰¥Low]	HPA:0460641	0.000242008	3.61617	4672	79	55	10877	PSMB1,PSMB3,PSMB2,GUK1,PSMA1,NUMA1,SRGAP2,SMARCC2,HNRNPK,CNOT9,SCAF11,CLEC16A,NCBP3,ANAPC10,ARHGEF6,ACAP1,IRF3,COPS6,PSMA7,NOP10,NSMCE1,PSMD9,PSMA3,MRPS10,WDR48,NUTF2,NEDD1,PFDN6,HPS3,INTS12,BORCS7,TUBA1C,ABI3,AIMP1,PPP1CA,KCMF1,PIH1D1,HSPA6,VBP1,ITSN2,XPO1,RPL37A,COMMD1,ZNF143,LSM6,LSM12,SRSF7,EIF3G,NAA10,LSM14A,TSEN34,RABEPK,MRPL55,MRPS18B,TNPO1
HPA	caudate	HPA:0080000	0.000244611	3.61152	6874	79	69	10877	PSMB1,PSMB3,PSMB2,GUK1,EMC7,PSMA1,NUMA1,VTI1A,SMARCC2,PPM1B,HNRNPK,CNOT9,SCAF11,CLEC16A,PFDN1,NCBP3,PTRHD1,ACAP1,PSMA6,IRF3,COPS6,PSMA4,COMMD10,PSMA7,NOP10,NSMCE1,PSMD9,MRPS24,MRPS10,SEC13,RPL11,WDR48,NEDD1,PLEKHA2,PFDN6,HPS3,CNOT11,INTS12,BORCS7,TUBA1C,ABI3,AIMP1,PPP1CA,PIH1D1,MKRN2,NFKB1,HSPA6,VBP1,CCDC93,ITSN2,XPO1,RPL37A,COMMD1,NDUFAF3,ZNF143,LSM6,LSM12,SRSF7,PSMD4,EIF3G,NAA10,LSM14A,TSEN34,R…
HPA	skin 1; melanocytes[â‰¥Low]	HPA:0460671	0.00029665	3.52776	5423	79	60	10877	PSMB1,PSMB3,PSMB2,GUK1,EMC7,PSMA1,NUMA1,SRGAP2,SMARCC2,ZBTB8OS,HNRNPK,SCAF11,CLEC16A,NCBP3,ANAPC10,ARHGEF6,ACAP1,IRF3,COPS6,PSMA7,NOP10,NSMCE1,PSMD9,PSMA3,MRPS10,RPL11,WDR48,NUTF2,NEDD1,PFDN6,HPS3,INTS12,BORCS7,TUBA1C,AIMP1,PPP1CA,KCMF1,PIH1D1,MKRN2,NFKB1,HSPA6,VBP1,CCDC93,SNX6,XPO1,RPL37A,COMMD1,NDUFAF3,ZNF143,LSM6,LSM12,SRSF7,PSMD4,EIF3G,NAA10,LSM14A,TSEN34,MRPL55,MRPS18B,TNPO1
HPA	adrenal gland; glandular cells[â‰¥Medium]	HPA:0020052	0.000354018	3.45097	5910	79	63	10877	PSMB1,PSMB3,PSMB2,GUK1,EMC7,PSMA1,NUMA1,SRGAP2,VTI1A,SMARCC2,PPM1B,HNRNPK,CNOT9,CLEC16A,PFDN1,NCBP3,ACAP1,PSMA6,IRF3,PSMA4,MIEN1,PSMA7,NOP10,PSMD9,MRPS24,PSMA3,MRPS10,SEC13,RPL11,WDR48,NUTF2,NEDD1,PLEKHA2,HPS3,INTS12,BORCS7,TUBA1C,AIMP1,KCMF1,PIH1D1,MKRN2,NFKB1,HSPA6,VBP1,CCDC93,XPO1,RPL37A,COMMD1,NDUFAF3,LSM6,LSM12,SRSF7,PSMD4,EIF3G,NAA10,LSM14A,TSEN34,RABEPK,CHMP4B,ARPC5L,MRPL55,MRPS18B,TNPO1
HPA	bone marrow; hematopoietic cells[â‰¥Low]	HPA:0040081	0.000370384	3.43135	6406	79	66	10877	PSMB1,PSMB3,PSMB2,GUK1,EMC7,PSMA1,NUMA1,SRGAP2,VTI1A,SMARCC2,ZBTB8OS,PPM1B,HNRNPK,PFDN1,NCBP3,PTRHD1,ANAPC10,ARHGEF6,ACAP1,IRF3,COPS6,PSMA4,MIEN1,PSMA7,NSMCE1,PSMD9,MRPS24,PSMA3,MRPS10,SEC13,RPL11,WDR48,NUTF2,NEDD1,PLEKHA2,HPS3,INTS12,BORCS7,TUBA1C,ABI3,AIMP1,PPP1CA,KCMF1,PIH1D1,MKRN2,NFKB1,VBP1,XPO1,RPL37A,COMMD1,NDUFAF3,ZNF143,LSM6,LSM12,SRSF7,PSMD4,EIF3G,NAA10,LSM14A,RABEPK,CHMP4B,ARPC5L,MRPL5…
HPA	bone marrow	HPA:0040000	0.000370384	3.43135	6406	79	66	10877	PSMB1,PSMB3,PSMB2,GUK1,EMC7,PSMA1,NUMA1,SRGAP2,VTI1A,SMARCC2,ZBTB8OS,PPM1B,HNRNPK,PFDN1,NCBP3,PTRHD1,ANAPC10,ARHGEF6,ACAP1,IRF3,COPS6,PSMA4,MIEN1,PSMA7,NSMCE1,PSMD9,MRPS24,PSMA3,MRPS10,SEC13,RPL11,WDR48,NUTF2,NEDD1,PLEKHA2,HPS3,INTS12,BORCS7,TUBA1C,ABI3,AIMP1,PPP1CA,KCMF1,PIH1D1,MKRN2,NFKB1,VBP1,XPO1,RPL37A,COMMD1,NDUFAF3,ZNF143,LSM6,LSM12,SRSF7,PSMD4,EIF3G,NAA10,LSM14A,RABEPK,CHMP4B,ARPC5L,MRPL5…
HPA	prostate; glandular cells[â‰¥Medium]	HPA:0390052	0.000385834	3.4136	4730	79	55	10877	PSMB1,PSMB2,GUK1,PSMA1,NUMA1,SRGAP2,VTI1A,SMARCC2,PPM1B,HNRNPK,SCAF11,CLEC16A,NCBP3,ANAPC10,PSMA6,IRF3,PSMA4,MIEN1,PSMA7,NSMCE1,PSMD9,MRPS24,MRPS10,SEC13,RPL11,WDR48,NEDD1,PLEKHA2,PFDN6,HPS3,CNOT11,INTS12,BORCS7,TUBA1C,AIMP1,KCMF1,PIH1D1,MKRN2,HSPA6,VBP1,CCDC93,ITSN2,XPO1,RPL37A,COMMD1,NDUFAF3,LSM12,EIF3G,NAA10,LSM14A,RABEPK,CHMP4B,MRPL55,MRPS18B,TNPO1
HPA	ovary; ovarian stroma cells[â‰¥Low]	HPA:0340461	0.000404133	3.39348	3928	79	49	10877	PSMB1,GUK1,EMC7,PSMA1,NUMA1,SRGAP2,SMARCC2,PPM1B,HNRNPK,SCAF11,PFDN1,NCBP3,IRF3,COPS6,MIEN1,PSMA7,NOP10,PSMD9,MRPS10,WDR48,NEDD1,PLEKHA2,PFDN6,HPS3,INTS12,BORCS7,TUBA1C,AIMP1,KCMF1,PIH1D1,MKRN2,NFKB1,HSPA6,VBP1,CCDC93,XPO1,RPL37A,NDUFAF3,ZNF143,LSM6,LSM12,SRSF7,EIF3G,LSM14A,TSEN34,RABEPK,MRPL55,MRPS18B,TNPO1
HPA	caudate; neuronal cells[â‰¥Medium]	HPA:0080132	0.000413693	3.38332	4061	79	50	10877	PSMB1,PSMB3,PSMB2,GUK1,EMC7,PSMA1,NUMA1,VTI1A,SMARCC2,PPM1B,HNRNPK,CNOT9,CLEC16A,ACAP1,PSMA6,IRF3,COPS6,PSMA7,NOP10,PSMD9,MRPS10,RPL11,WDR48,NEDD1,PLEKHA2,PFDN6,HPS3,CNOT11,BORCS7,TUBA1C,AIMP1,PPP1CA,PIH1D1,VBP1,CCDC93,XPO1,RPL37A,COMMD1,NDUFAF3,LSM6,LSM12,SRSF7,PSMD4,NAA10,RABEPK,CHMP4B,ARPC5L,MRPL55,MRPS18B,TNPO1
HPA	bronchus; respiratory epithelial cells[â‰¥Low]	HPA:0060101	0.000510443	3.29205	6282	79	65	10877	PSMB1,PSMB3,PSMB2,GUK1,EMC7,PSMA1,NUMA1,SRGAP2,VTI1A,SMARCC2,ZBTB8OS,PPM1B,HNRNPK,SCAF11,PFDN1,NCBP3,ANAPC10,ARHGEF6,ACAP1,PSMA6,IRF3,COPS6,PSMA4,PSMA7,NOP10,NSMCE1,MRPS24,PSMA3,MRPS10,SEC13,RPL11,WDR48,NEDD1,PLEKHA2,HPS3,INTS12,BORCS7,TUBA1C,AIMP1,PPP1CA,KCMF1,PIH1D1,MKRN2,NFKB1,HSPA6,VBP1,CCDC93,ITSN2,XPO1,RPL37A,COMMD1,NDUFAF3,ZNF143,LSM6,LSM12,SRSF7,PSMD4,EIF3G,NAA10,LSM14A,RABEPK,ARPC5L,MRPL…
HPA	spleen	HPA:0530000	0.0005513	3.25861	5811	79	62	10877	PSMB1,PSMB3,PSMB2,GUK1,EMC7,PSMA1,NUMA1,VTI1A,SMARCC2,ZBTB8OS,PPM1B,HNRNPK,CNOT9,SCAF11,PFDN1,NCBP3,PTRHD1,ANAPC10,ACAP1,PSMA6,IRF3,COPS6,PSMA4,PSMA7,NOP10,PSMD9,MRPS24,MRPS10,SEC13,RPL11,WDR48,NEDD1,PLEKHA2,PFDN6,HPS3,INTS12,BORCS7,TUBA1C,ABI3,AIMP1,PPP1CA,PIH1D1,NFKB1,HSPA6,VBP1,XPO1,RPL37A,COMMD1,NDUFAF3,ZNF143,LSM6,LSM12,EIF3G,NAA10,LSM14A,TSEN34,RABEPK,CHMP4B,ARPC5L,MRPL55,MRPS18B,TNPO1
HPA	thyroid gland; glandular cells[â‰¥Medium]	HPA:0590052	0.000556859	3.25425	5505	79	60	10877	PSMB1,PSMB3,PSMB2,GUK1,PSMA1,NUMA1,SRGAP2,VTI1A,SMARCC2,PPM1B,HNRNPK,CNOT9,SCAF11,CLEC16A,PFDN1,NCBP3,PTRHD1,ANAPC10,ACAP1,PSMA6,IRF3,COPS6,PSMA7,NSMCE1,PSMD9,MRPS24,MRPS10,RPL11,WDR48,NUTF2,NEDD1,PLEKHA2,HPS3,INTS12,BORCS7,TUBA1C,AIMP1,KCMF1,PIH1D1,MKRN2,HSPA6,VBP1,CCDC93,XPO1,RPL37A,COMMD1,NDUFAF3,ZNF143,LSM6,LSM12,SRSF7,PSMD4,EIF3G,LSM14A,TSEN34,RABEPK,CHMP4B,MRPL55,MRPS18B,TNPO1
HPA	pancreas; exocrine glandular cells[â‰¥Medium]	HPA:0350472	0.000577753	3.23826	5212	79	58	10877	PSMB1,PSMB3,PSMB2,GUK1,PSMA1,NUMA1,VTI1A,SMARCC2,PPM1B,HNRNPK,CNOT9,CLEC16A,PFDN1,NCBP3,PTRHD1,ANAPC10,ACAP1,PSMA6,IRF3,COPS6,PSMA4,COMMD10,PSMA7,NOP10,PSMD9,MRPS24,MRPS10,SEC13,RPL11,WDR48,NUTF2,NEDD1,PLEKHA2,PFDN6,HPS3,CNOT11,INTS12,BORCS7,TUBA1C,AIMP1,PPP1CA,KCMF1,PIH1D1,MKRN2,VBP1,XPO1,RPL37A,COMMD1,NDUFAF3,LSM6,LSM12,SRSF7,EIF3G,TSEN34,CHMP4B,MRPL55,MRPS18B,TNPO1
HPA	nasopharynx; respiratory epithelial cells[â‰¥Low]	HPA:0320101	0.000585563	3.23243	6137	79	64	10877	PSMB1,PSMB3,PSMB2,GUK1,EMC7,PSMA1,NUMA1,SRGAP2,VTI1A,SMARCC2,ZBTB8OS,PPM1B,HNRNPK,CNOT9,SCAF11,PFDN1,NCBP3,ANAPC10,ARHGEF6,ACAP1,PSMA6,IRF3,COPS6,PSMA4,NOP10,NSMCE1,PSMD9,PSMA3,MRPS10,RPL11,WDR48,NEDD1,PLEKHA2,PFDN6,HPS3,INTS12,BORCS7,TUBA1C,AIMP1,PPP1CA,KCMF1,PIH1D1,MKRN2,NFKB1,HSPA6,VBP1,CCDC93,ITSN2,XPO1,RPL37A,COMMD1,NDUFAF3,ZNF143,LSM6,LSM12,SRSF7,EIF3G,NAA10,LSM14A,RABEPK,ARPC5L,MRPL55,MRPS…
HPA	appendix; glandular cells[â‰¥Medium]	HPA:0030052	0.000594263	3.22602	5821	79	62	10877	PSMB1,PSMB3,PSMB2,GUK1,EMC7,PSMA1,NUMA1,VTI1A,SMARCC2,PPM1B,HNRNPK,CNOT9,SCAF11,CLEC16A,PFDN1,NCBP3,ANAPC10,ACAP1,PSMA6,IRF3,COPS6,PSMA4,COMMD10,PSMA7,NOP10,PSMD9,MRPS24,MRPS10,RPL11,WDR48,NUTF2,NEDD1,PLEKHA2,PFDN6,HPS3,CNOT11,INTS12,BORCS7,TUBA1C,AIMP1,PPP1CA,KCMF1,PIH1D1,MKRN2,NFKB1,VBP1,CCDC93,XPO1,RPL37A,COMMD1,NDUFAF3,LSM6,LSM12,SRSF7,EIF3G,LSM14A,RABEPK,CHMP4B,ARPC5L,MRPL55,MRPS18B,TNPO1
HPA	oral mucosa; squamous epithelial cells[â‰¥Low]	HPA:0330221	0.000699887	3.15497	6161	79	64	10877	PSMB1,PSMB3,PSMB2,GUK1,PSMA1,NUMA1,SRGAP2,VTI1A,SMARCC2,ZBTB8OS,PPM1B,HNRNPK,CNOT9,SCAF11,PFDN1,NCBP3,PTRHD1,ANAPC10,ACAP1,PSMA6,IRF3,COPS6,PSMA4,COMMD10,PSMA7,NOP10,NSMCE1,PSMD9,MRPS24,MRPS10,SEC13,RPL11,NUTF2,NEDD1,PLEKHA2,PFDN6,HPS3,INTS12,BORCS7,TUBA1C,AIMP1,PPP1CA,KCMF1,PIH1D1,MKRN2,NFKB1,HSPA6,ITSN2,XPO1,NDUFAF3,ZNF143,LSM6,LSM12,SRSF7,PSMD4,EIF3G,NAA10,LSM14A,TSEN34,RABEPK,CHMP4B,MRPL55,MR…
HPA	oral mucosa	HPA:0330000	0.000699887	3.15497	6161	79	64	10877	PSMB1,PSMB3,PSMB2,GUK1,PSMA1,NUMA1,SRGAP2,VTI1A,SMARCC2,ZBTB8OS,PPM1B,HNRNPK,CNOT9,SCAF11,PFDN1,NCBP3,PTRHD1,ANAPC10,ACAP1,PSMA6,IRF3,COPS6,PSMA4,COMMD10,PSMA7,NOP10,NSMCE1,PSMD9,MRPS24,MRPS10,SEC13,RPL11,NUTF2,NEDD1,PLEKHA2,PFDN6,HPS3,INTS12,BORCS7,TUBA1C,AIMP1,PPP1CA,KCMF1,PIH1D1,MKRN2,NFKB1,HSPA6,ITSN2,XPO1,NDUFAF3,ZNF143,LSM6,LSM12,SRSF7,PSMD4,EIF3G,NAA10,LSM14A,TSEN34,RABEPK,CHMP4B,MRPL55,MR…
HPA	lymph node; germinal center cells[â‰¥Medium]	HPA:0310432	0.000793636	3.10038	3257	79	43	10877	PSMB1,PSMB2,PSMA1,NUMA1,VTI1A,SMARCC2,ZBTB8OS,HNRNPK,SCAF11,PFDN1,NCBP3,PTRHD1,ANAPC10,ACAP1,IRF3,COPS6,PSMA4,PSMA7,PSMD9,MRPS10,RPL11,WDR48,NEDD1,PFDN6,BORCS7,TUBA1C,AIMP1,PIH1D1,NFKB1,VBP1,XPO1,RPL37A,NDUFAF3,ZNF143,LSM6,LSM12,EIF3G,NAA10,LSM14A,CHMP4B,MRPL55,MRPS18B,TNPO1
HPA	epididymis; glandular cells[â‰¥Medium]	HPA:0180052	0.00113858	2.94364	5601	79	60	10877	PSMB1,PSMB3,PSMB2,GUK1,EMC7,PSMA1,NUMA1,SRGAP2,VTI1A,SMARCC2,ZBTB8OS,PPM1B,HNRNPK,SCAF11,PFDN1,NCBP3,PTRHD1,ANAPC10,PSMA6,IRF3,COPS6,PSMA4,PSMA7,NOP10,PSMD9,MRPS10,SEC13,RPL11,NUTF2,NEDD1,PLEKHA2,PFDN6,HPS3,INTS12,BORCS7,TUBA1C,AIMP1,PPP1CA,KCMF1,PIH1D1,MKRN2,NFKB1,HSPA6,VBP1,CCDC93,XPO1,RPL37A,NDUFAF3,LSM6,LSM12,SRSF7,PSMD4,EIF3G,NAA10,LSM14A,RABEPK,ARPC5L,MRPL55,MRPS18B,TNPO1
HPA	pancreas; pancreatic endocrine cells[â‰¥Medium]	HPA:0351182	0.00129648	2.88723	3560	79	45	10877	PSMB1,PSMB2,GUK1,PSMA1,NUMA1,SMARCC2,PPM1B,HNRNPK,ACAP1,PSMA6,IRF3,PSMA4,MIEN1,PSMA7,NOP10,NSMCE1,PSMD9,MRPS24,MRPS10,WDR48,NEDD1,PLEKHA2,PFDN6,HPS3,CNOT11,INTS12,BORCS7,TUBA1C,AIMP1,KCMF1,PIH1D1,MKRN2,VBP1,CCDC93,XPO1,RPL37A,COMMD1,NDUFAF3,LSM6,LSM12,EIF3G,CHMP4B,MRPL55,MRPS18B,TNPO1
HPA	parathyroid gland; glandular cells[â‰¥Medium]	HPA:0360052	0.00142072	2.84749	4348	79	51	10877	PSMB1,PSMB3,PSMB2,GUK1,EMC7,PSMA1,NUMA1,VTI1A,SMARCC2,PPM1B,HNRNPK,CNOT9,CLEC16A,NCBP3,PTRHD1,ANAPC10,ACAP1,PSMA6,IRF3,COPS6,PSMA4,MIEN1,PSMA7,PSMD9,MRPS24,PSMA3,MRPS10,RPL11,WDR48,NUTF2,NEDD1,PLEKHA2,CNOT11,INTS12,BORCS7,TUBA1C,AIMP1,PPP1CA,PIH1D1,MKRN2,NFKB1,VBP1,CCDC93,ITSN2,COMMD1,NDUFAF3,LSM6,SRSF7,EIF3G,MRPL55,TNPO1
HPA	skin 1; fibroblasts[â‰¥Low]	HPA:0460651	0.00148835	2.8273	4765	79	54	10877	PSMB1,PSMB3,PSMB2,GUK1,PSMA1,NUMA1,SMARCC2,PPM1B,HNRNPK,SCAF11,CLEC16A,NCBP3,PTRHD1,ARHGEF6,PSMA6,IRF3,COPS6,PSMA7,NSMCE1,PSMD9,MRPS24,PSMA3,MRPS10,RPL11,WDR48,NEDD1,PFDN6,HPS3,INTS12,BORCS7,TUBA1C,AIMP1,PPP1CA,KCMF1,PIH1D1,NFKB1,HSPA6,VBP1,CCDC93,XPO1,RPL37A,COMMD1,NDUFAF3,ZNF143,LSM6,LSM12,SRSF7,PSMD4,LSM14A,TSEN34,RABEPK,MRPL55,MRPS18B,TNPO1
HPA	cerebral cortex; neuronal cells[â‰¥Medium]	HPA:0100132	0.00169372	2.77116	4923	79	55	10877	PSMB3,PSMB2,GUK1,PSMA1,NUMA1,VTI1A,SMARCC2,PPM1B,HNRNPK,CNOT9,PFDN1,NCBP3,ACAP1,PSMA6,IRF3,COPS6,PSMA7,NOP10,PSMD9,MRPS24,MRPS10,SEC13,RPL11,WDR48,NEDD1,PLEKHA2,PFDN6,HPS3,CNOT11,INTS12,BORCS7,TUBA1C,AIMP1,PPP1CA,KCMF1,PIH1D1,MKRN2,VBP1,CCDC93,XPO1,RPL37A,COMMD1,NDUFAF3,LSM6,LSM12,SRSF7,PSMD4,EIF3G,NAA10,RABEPK,CHMP4B,ARPC5L,MRPL55,MRPS18B,TNPO1
HPA	placenta; trophoblastic cells[â‰¥Low]	HPA:0380521	0.00174053	2.75932	6450	79	65	10877	PSMB1,PSMB3,PSMB2,GUK1,EMC7,PSMA1,NUMA1,VTI1A,SMARCC2,PPM1B,HNRNPK,CNOT9,SCAF11,CLEC16A,PFDN1,NCBP3,PTRHD1,ACAP1,PSMA6,IRF3,COPS6,PSMA4,COMMD10,MIEN1,PSMA7,MRPS24,PSMA3,SEC13,RPL11,WDR48,NUTF2,NEDD1,PLEKHA2,PFDN6,HPS3,INTS12,BORCS7,TUBA1C,AIMP1,PPP1CA,KCMF1,PIH1D1,MKRN2,NFKB1,HSPA6,VBP1,CCDC93,ITSN2,XPO1,RPL37A,COMMD1,NDUFAF3,ZNF143,LSM6,LSM12,SRSF7,PSMD4,EIF3G,NAA10,TSEN34,CHMP4B,ARPC5L,MRPL55,M…
HPA	cerebral cortex; neuronal cells[â‰¥Low]	HPA:0100131	0.00183449	2.73649	6624	79	66	10877	PSMB1,PSMB3,PSMB2,GUK1,EMC7,PSMA1,NUMA1,VTI1A,SMARCC2,PPM1B,HNRNPK,CNOT9,SCAF11,CLEC16A,PFDN1,NCBP3,ANAPC10,ACAP1,PSMA6,IRF3,COPS6,PSMA4,PSMA7,NOP10,PSMD9,MRPS24,MRPS10,SEC13,RPL11,WDR48,NEDD1,PLEKHA2,PFDN6,HPS3,CNOT11,INTS12,BORCS7,TUBA1C,AIMP1,PPP1CA,KCMF1,PIH1D1,MKRN2,HSPA6,VBP1,CCDC93,XPO1,RPL37A,COMMD1,NDUFAF3,ZNF143,LSM6,LSM12,SRSF7,PSMD4,EIF3G,NAA10,LSM14A,TSEN34,RABEPK,CHMP4B,ARPC5L,MRPL5…
HPA	lung; alveolar cells[â‰¥Low]	HPA:0301171	0.00184194	2.73472	5077	79	56	10877	PSMB1,PSMB2,GUK1,EMC7,PSMA1,NUMA1,SMARCC2,ZBTB8OS,PPM1B,HNRNPK,SCAF11,PFDN1,NCBP3,PTRHD1,PSMA6,IRF3,COPS6,COMMD10,MIEN1,PSMA7,NOP10,PSMD9,PSMA3,MRPS10,WDR48,NUTF2,NEDD1,PLEKHA2,HPS3,INTS12,BORCS7,TUBA1C,AIMP1,PIH1D1,MKRN2,NFKB1,HSPA6,VBP1,CCDC93,XPO1,RPL37A,COMMD1,NDUFAF3,ZNF143,LSM6,LSM12,SRSF7,EIF3G,NAA10,LSM14A,TSEN34,RABEPK,ARPC5L,MRPL55,MRPS18B,TNPO1
HPA	bronchus; respiratory epithelial cells[â‰¥Medium]	HPA:0060102	0.00203067	2.69236	5235	79	57	10877	PSMB1,PSMB3,PSMB2,GUK1,PSMA1,NUMA1,SRGAP2,SMARCC2,PPM1B,HNRNPK,SCAF11,PFDN1,NCBP3,ACAP1,PSMA6,IRF3,COPS6,PSMA4,PSMA7,NOP10,NSMCE1,MRPS24,PSMA3,MRPS10,RPL11,NEDD1,PLEKHA2,HPS3,INTS12,TUBA1C,AIMP1,PPP1CA,KCMF1,PIH1D1,MKRN2,NFKB1,HSPA6,VBP1,CCDC93,ITSN2,XPO1,RPL37A,COMMD1,NDUFAF3,ZNF143,LSM6,LSM12,SRSF7,PSMD4,EIF3G,NAA10,LSM14A,RABEPK,ARPC5L,MRPL55,MRPS18B,TNPO1
HPA	hippocampus; neuronal cells[â‰¥Medium]	HPA:0250132	0.00262054	2.58161	4162	79	49	10877	PSMB1,PSMB2,GUK1,EMC7,PSMA1,NUMA1,VTI1A,SMARCC2,PPM1B,HNRNPK,CNOT9,PFDN1,ACAP1,PSMA6,IRF3,COPS6,PSMA4,PSMA7,NOP10,PSMD9,MRPS24,MRPS10,RPL11,WDR48,NEDD1,PLEKHA2,PFDN6,HPS3,CNOT11,BORCS7,TUBA1C,AIMP1,PPP1CA,PIH1D1,VBP1,XPO1,RPL37A,COMMD1,NDUFAF3,LSM6,SRSF7,PSMD4,NAA10,LSM14A,CHMP4B,ARPC5L,MRPL55,MRPS18B,TNPO1
HPA	urinary bladder; urothelial cells[â‰¥Medium]	HPA:0610832	0.00267145	2.57325	5873	79	61	10877	PSMB1,PSMB3,PSMB2,PSMA1,NUMA1,SRGAP2,SMARCC2,PPM1B,HNRNPK,SCAF11,PFDN1,NCBP3,PTRHD1,PSMA6,IRF3,COPS6,PSMA4,COMMD10,PSMA7,NOP10,NSMCE1,PSMD9,MRPS24,PSMA3,MRPS10,RPL11,WDR48,NUTF2,NEDD1,PLEKHA2,PFDN6,HPS3,CNOT11,INTS12,BORCS7,TUBA1C,AIMP1,KCMF1,PIH1D1,MKRN2,NFKB1,HSPA6,VBP1,CCDC93,XPO1,RPL37A,NDUFAF3,ZNF143,LSM6,LSM12,SRSF7,PSMD4,EIF3G,NAA10,LSM14A,TSEN34,RABEPK,ARPC5L,MRPL55,MRPS18B,TNPO1
HPA	duodenum; glandular cells[â‰¥Medium]	HPA:0150052	0.00320547	2.49411	6537	79	65	10877	PSMB1,PSMB3,PSMB2,GUK1,EMC7,PSMA1,NUMA1,SRGAP2,VTI1A,SMARCC2,PPM1B,HNRNPK,CNOT9,SCAF11,CLEC16A,NCBP3,PTRHD1,ANAPC10,ACAP1,PSMA6,IRF3,COPS6,PSMA4,COMMD10,PSMA7,NOP10,PSMD9,MRPS24,PSMA3,MRPS10,SEC13,RPL11,WDR48,NEDD1,PLEKHA2,PFDN6,HPS3,CNOT11,INTS12,BORCS7,TUBA1C,AIMP1,PPP1CA,KCMF1,PIH1D1,MKRN2,CCDC93,XPO1,COMMD1,NDUFAF3,ZNF143,LSM6,LSM12,SRSF7,PSMD4,EIF3G,NAA10,LSM14A,TSEN34,RABEPK,CHMP4B,ARPC5L,M…
HPA	cervix, uterine; glandular cells[â‰¥Low]	HPA:0110051	0.00371528	2.43001	5616	79	59	10877	PSMB1,PSMB3,PSMB2,GUK1,EMC7,PSMA1,NUMA1,VTI1A,SMARCC2,PPM1B,HNRNPK,CNOT9,SCAF11,PFDN1,NCBP3,ANAPC10,PSMA6,IRF3,COPS6,PSMA4,PSMA7,NOP10,PSMD9,MRPS24,PSMA3,MRPS10,RPL11,WDR48,NUTF2,NEDD1,PLEKHA2,PFDN6,HPS3,CNOT11,INTS12,BORCS7,TUBA1C,PPP1CA,KCMF1,PIH1D1,MKRN2,NFKB1,HSPA6,VBP1,XPO1,RPL37A,COMMD1,NDUFAF3,LSM12,SRSF7,EIF3G,NAA10,LSM14A,TSEN34,RABEPK,CHMP4B,MRPL55,MRPS18B,TNPO1
HPA	hippocampus; neuronal cells[â‰¥Low]	HPA:0250131	0.00585808	2.23225	6143	79	62	10877	PSMB1,PSMB3,PSMB2,GUK1,EMC7,PSMA1,NUMA1,VTI1A,SMARCC2,PPM1B,HNRNPK,CNOT9,SCAF11,CLEC16A,PFDN1,ACAP1,PSMA6,IRF3,COPS6,PSMA4,COMMD10,PSMA7,NOP10,PSMD9,MRPS24,MRPS10,RPL11,WDR48,NUTF2,NEDD1,PLEKHA2,PFDN6,HPS3,CNOT11,INTS12,BORCS7,TUBA1C,AIMP1,PPP1CA,KCMF1,PIH1D1,MKRN2,HSPA6,VBP1,CCDC93,XPO1,RPL37A,COMMD1,NDUFAF3,ZNF143,LSM6,SRSF7,PSMD4,EIF3G,NAA10,LSM14A,RABEPK,CHMP4B,ARPC5L,MRPL55,MRPS18B,TNPO1
HPA	breast; glandular cells[High]	HPA:0050053	0.00694857	2.1581	1320	79	23	10877	PSMB3,NUMA1,SMARCC2,HNRNPK,PSMA6,PSMA7,PSMA3,MRPS10,SEC13,NEDD1,CNOT11,INTS12,TUBA1C,PIH1D1,VBP1,RPL37A,NDUFAF3,LSM6,LSM12,EIF3G,LSM14A,MRPS18B,TNPO1
HPA	cervix, uterine; squamous epithelial cells[â‰¥Medium]	HPA:0110222	0.00799488	2.09719	3666	79	44	10877	PSMB1,PSMB2,GUK1,PSMA1,NUMA1,SMARCC2,HNRNPK,SCAF11,NCBP3,PTRHD1,IRF3,COPS6,PSMA4,PSMA7,PSMD9,MRPS24,MRPS10,SEC13,WDR48,NUTF2,NEDD1,PLEKHA2,PFDN6,HPS3,INTS12,BORCS7,AIMP1,PIH1D1,MKRN2,HSPA6,XPO1,RPL37A,COMMD1,NDUFAF3,LSM6,SRSF7,PSMD4,EIF3G,NAA10,LSM14A,TSEN34,RABEPK,MRPL55,MRPS18B
HPA	appendix; lymphoid tissue[â‰¥Medium]	HPA:0030072	0.00846756	2.07224	3180	79	40	10877	PSMB1,PSMB3,PSMB2,PSMA1,NUMA1,SMARCC2,PPM1B,HNRNPK,PFDN1,NCBP3,ACAP1,PSMA6,IRF3,PSMA4,PSMA7,PSMD9,MRPS24,MRPS10,WDR48,NEDD1,PLEKHA2,HPS3,INTS12,BORCS7,TUBA1C,ABI3,AIMP1,PPP1CA,PIH1D1,NFKB1,VBP1,XPO1,NDUFAF3,LSM6,LSM12,SRSF7,EIF3G,LSM14A,MRPL55,MRPS18B
HPA	liver	HPA:0290000	0.00932824	2.0302	6213	79	62	10877	PSMB1,PSMB3,PSMB2,GUK1,EMC7,PSMA1,NUMA1,SRGAP2,VTI1A,SMARCC2,PPM1B,HNRNPK,CNOT9,SCAF11,CLEC16A,PFDN1,NCBP3,ANAPC10,ARHGEF6,ACAP1,PSMA6,IRF3,PSMA4,COMMD10,MIEN1,PSMA7,NOP10,NSMCE1,PSMD9,PSMA3,MRPS10,RPL11,WDR48,NUTF2,NEDD1,HPS3,INTS12,BORCS7,TUBA1C,AIMP1,PPP1CA,PIH1D1,MKRN2,HSPA6,VBP1,CCDC93,ITSN2,RPL37A,COMMD1,NDUFAF3,LSM6,LSM12,SRSF7,PSMD4,EIF3G,TSEN34,RABEPK,CHMP4B,ARPC5L,MRPL55,MRPS18B,TNPO1
HPA	placenta; decidual cells[â‰¥Low]	HPA:0380511	0.010779	1.96742	4765	79	52	10877	PSMB3,PSMB2,GUK1,EMC7,NUMA1,SMARCC2,ZBTB8OS,PPM1B,HNRNPK,CNOT9,SCAF11,PFDN1,NCBP3,ACAP1,PSMA6,COPS6,COMMD10,MIEN1,PSMA7,MRPS24,PSMA3,MRPS10,RPL11,PLEKHA2,HPS3,CNOT11,INTS12,AIMP1,PPP1CA,KCMF1,PIH1D1,MKRN2,NFKB1,HSPA6,VBP1,CCDC93,ITSN2,XPO1,RPL37A,COMMD1,NDUFAF3,ZNF143,LSM12,SRSF7,NAA10,LSM14A,RABEPK,CHMP4B,ARPC5L,MRPL55,MRPS18B,TNPO1
HPA	lung; macrophages[â‰¥Medium]	HPA:0300412	0.0108521	1.96449	4766	79	52	10877	PSMB1,PSMB3,GUK1,EMC7,PSMA1,NUMA1,SMARCC2,ZBTB8OS,PPM1B,HNRNPK,CNOT9,SCAF11,PFDN1,NCBP3,ACAP1,PSMA6,IRF3,COPS6,PSMA4,PSMA7,NSMCE1,PSMD9,MRPS10,RPL11,NEDD1,PLEKHA2,HPS3,CNOT11,INTS12,BORCS7,TUBA1C,AIMP1,PPP1CA,KCMF1,PIH1D1,MKRN2,VBP1,CCDC93,XPO1,RPL37A,COMMD1,NDUFAF3,LSM12,SRSF7,PSMD4,EIF3G,TSEN34,RABEPK,ARPC5L,MRPL55,MRPS18B,TNPO1
HPA	heart muscle; cardiomyocytes[â‰¥Low]	HPA:0241101	0.0112737	1.94793	6242	79	62	10877	PSMB1,PSMB3,PSMB2,GUK1,EMC7,PSMA1,NUMA1,SRGAP2,VTI1A,SMARCC2,PPM1B,HNRNPK,CNOT9,SCAF11,CLEC16A,PFDN1,NCBP3,ANAPC10,PSMA6,IRF3,COPS6,PSMA4,COMMD10,MIEN1,PSMA7,NOP10,NSMCE1,PSMD9,MRPS24,PSMA3,MRPS10,SEC13,NEDD1,PFDN6,HPS3,INTS12,BORCS7,TUBA1C,ABI3,AIMP1,PPP1CA,KCMF1,PIH1D1,MKRN2,HSPA6,VBP1,CCDC93,SNX6,XPO1,COMMD1,NDUFAF3,ZNF143,LSM6,LSM12,SRSF7,LSM14A,RABEPK,CHMP4B,ARPC5L,MRPL55,MRPS18B,TNPO1
HPA	heart muscle	HPA:0240000	0.0112737	1.94793	6242	79	62	10877	PSMB1,PSMB3,PSMB2,GUK1,EMC7,PSMA1,NUMA1,SRGAP2,VTI1A,SMARCC2,PPM1B,HNRNPK,CNOT9,SCAF11,CLEC16A,PFDN1,NCBP3,ANAPC10,PSMA6,IRF3,COPS6,PSMA4,COMMD10,MIEN1,PSMA7,NOP10,NSMCE1,PSMD9,MRPS24,PSMA3,MRPS10,SEC13,NEDD1,PFDN6,HPS3,INTS12,BORCS7,TUBA1C,ABI3,AIMP1,PPP1CA,KCMF1,PIH1D1,MKRN2,HSPA6,VBP1,CCDC93,SNX6,XPO1,COMMD1,NDUFAF3,ZNF143,LSM6,LSM12,SRSF7,LSM14A,RABEPK,CHMP4B,ARPC5L,MRPL55,MRPS18B,TNPO1
HPA	cervix, uterine; glandular cells[â‰¥Medium]	HPA:0110052	0.0116147	1.93499	3973	79	46	10877	PSMB1,PSMB3,PSMB2,GUK1,PSMA1,NUMA1,SMARCC2,PPM1B,HNRNPK,CNOT9,SCAF11,NCBP3,ANAPC10,IRF3,COPS6,PSMA4,PSMA7,NOP10,PSMD9,RPL11,NUTF2,NEDD1,PLEKHA2,PFDN6,HPS3,INTS12,BORCS7,TUBA1C,PPP1CA,KCMF1,PIH1D1,MKRN2,VBP1,XPO1,COMMD1,NDUFAF3,LSM12,SRSF7,EIF3G,NAA10,LSM14A,TSEN34,RABEPK,MRPL55,MRPS18B,TNPO1
HPA	nasopharynx; respiratory epithelial cells[â‰¥Medium]	HPA:0320102	0.012013	1.92035	5061	79	54	10877	PSMB1,PSMB3,PSMB2,GUK1,PSMA1,NUMA1,SRGAP2,VTI1A,SMARCC2,ZBTB8OS,PPM1B,HNRNPK,SCAF11,NCBP3,ANAPC10,PSMA6,IRF3,COPS6,NOP10,PSMD9,PSMA3,MRPS10,RPL11,NEDD1,PLEKHA2,PFDN6,HPS3,INTS12,BORCS7,TUBA1C,AIMP1,KCMF1,PIH1D1,MKRN2,NFKB1,HSPA6,VBP1,CCDC93,ITSN2,XPO1,RPL37A,COMMD1,NDUFAF3,ZNF143,LSM6,LSM12,SRSF7,EIF3G,NAA10,LSM14A,RABEPK,MRPL55,MRPS18B,TNPO1
HPA	salivary gland; glandular cells[â‰¥Medium]	HPA:0420052	0.0126689	1.89726	4789	79	52	10877	PSMB1,PSMB3,PSMB2,GUK1,PSMA1,NUMA1,SRGAP2,VTI1A,SMARCC2,ZBTB8OS,PPM1B,HNRNPK,CLEC16A,PFDN1,NCBP3,ANAPC10,PSMA6,IRF3,COPS6,PSMA4,MIEN1,PSMA7,PSMD9,MRPS24,MRPS10,RPL11,WDR48,NEDD1,PLEKHA2,PFDN6,HPS3,INTS12,BORCS7,TUBA1C,AIMP1,PIH1D1,MKRN2,HSPA6,CCDC93,XPO1,RPL37A,COMMD1,NDUFAF3,ZNF143,LSM6,LSM12,EIF3G,LSM14A,RABEPK,MRPL55,MRPS18B,TNPO1
HPA	colon; peripheral nerve/ganglion[â‰¥Low]	HPA:0130241	0.0130062	1.88585	5073	79	54	10877	PSMB1,PSMB3,PSMB2,GUK1,EMC7,PSMA1,NUMA1,SRGAP2,VTI1A,SMARCC2,ZBTB8OS,PPM1B,HNRNPK,SCAF11,PFDN1,NCBP3,PTRHD1,ANAPC10,PSMA6,IRF3,COPS6,PSMA4,MIEN1,MRPS24,PSMA3,SEC13,NUTF2,NEDD1,PLEKHA2,CNOT11,INTS12,BORCS7,TUBA1C,AIMP1,KCMF1,PIH1D1,MKRN2,HSPA6,SNX6,ITSN2,XPO1,RPL37A,COMMD1,NDUFAF3,LSM6,LSM12,SRSF7,NAA10,LSM14A,TSEN34,CHMP4B,ARPC5L,MRPS18B,TNPO1
HPA	endometrium 1; cells in endometrial stroma[â‰¥Low]	HPA:0160251	0.0149615	1.82503	4009	79	46	10877	PSMB1,GUK1,EMC7,PSMA1,NUMA1,SMARCC2,ZBTB8OS,PPM1B,HNRNPK,PFDN1,PTRHD1,ARHGEF6,COPS6,PSMA7,PSMD9,MRPS10,RPL11,WDR48,NEDD1,HPS3,INTS12,BORCS7,TUBA1C,AIMP1,PIH1D1,MKRN2,NFKB1,VBP1,CCDC93,SNX6,XPO1,RPL37A,COMMD1,NDUFAF3,ZNF143,LSM6,LSM12,SRSF7,EIF3G,NAA10,LSM14A,TSEN34,RABEPK,MRPL55,MRPS18B,TNPO1
HPA	cervix, uterine; squamous epithelial cells[â‰¥Low]	HPA:0110221	0.0151412	1.81984	5383	79	56	10877	PSMB1,PSMB3,PSMB2,GUK1,PSMA1,NUMA1,SRGAP2,SMARCC2,PPM1B,HNRNPK,SCAF11,CLEC16A,NCBP3,PTRHD1,PSMA6,IRF3,COPS6,PSMA4,COMMD10,PSMA7,PSMD9,MRPS24,MRPS10,SEC13,WDR48,NUTF2,NEDD1,PLEKHA2,PFDN6,HPS3,CNOT11,INTS12,BORCS7,AIMP1,PPP1CA,PIH1D1,MKRN2,HSPA6,CCDC93,SNX6,XPO1,RPL37A,COMMD1,NDUFAF3,LSM6,LSM12,SRSF7,PSMD4,EIF3G,NAA10,LSM14A,TSEN34,RABEPK,CHMP4B,MRPL55,MRPS18B
HPA	tonsil; non-germinal center cells[High]	HPA:0600443	0.0156812	1.80462	1294	79	22	10877	PSMB2,PSMA1,NUMA1,SMARCC2,ZBTB8OS,HNRNPK,NCBP3,ACAP1,PSMD9,MRPS10,PLEKHA2,TUBA1C,ABI3,PIH1D1,NFKB1,VBP1,LSM6,LSM12,EIF3G,MRPL55,MRPS18B,TNPO1
HPA	cerebellum	HPA:0090000	0.0160664	1.79408	7114	79	67	10877	PSMB1,PSMB3,PSMB2,EMC7,PSMA1,NUMA1,SRGAP2,VTI1A,SMARCC2,PPM1B,HNRNPK,CNOT9,SCAF11,CLEC16A,PFDN1,NCBP3,PTRHD1,ACAP1,PSMA6,IRF3,COPS6,PSMA4,COMMD10,MIEN1,PSMA7,NOP10,PSMD9,MRPS24,MRPS10,RPL11,WDR48,NEDD1,PLEKHA2,PFDN6,HPS3,CNOT11,INTS12,BORCS7,TUBA1C,ABI3,AIMP1,PPP1CA,KCMF1,PIH1D1,MKRN2,NFKB1,HSPA6,VBP1,CCDC93,XPO1,RPL37A,COMMD1,NDUFAF3,ZNF143,LSM6,LSM12,SRSF7,PSMD4,EIF3G,NAA10,LSM14A,RABEPK,CHMP4B…
HPA	cerebellum; cells in molecular layer[â‰¥Low]	HPA:0090191	0.0324497	1.48879	4388	79	48	10877	PSMB1,PSMB2,EMC7,PSMA1,NUMA1,SRGAP2,VTI1A,SMARCC2,PPM1B,HNRNPK,CNOT9,CLEC16A,PFDN1,NCBP3,PTRHD1,ACAP1,PSMA6,IRF3,PSMA4,PSMA7,NOP10,RPL11,WDR48,NEDD1,PLEKHA2,HPS3,CNOT11,INTS12,BORCS7,TUBA1C,PPP1CA,PIH1D1,VBP1,CCDC93,XPO1,RPL37A,COMMD1,NDUFAF3,ZNF143,LSM6,LSM12,SRSF7,EIF3G,LSM14A,RABEPK,ARPC5L,MRPL55,TNPO1
HPA	vagina; squamous epithelial cells[â‰¥Medium]	HPA:0620222	0.0324688	1.48853	3993	79	45	10877	PSMB1,PSMB3,GUK1,PSMA1,NUMA1,VTI1A,SMARCC2,HNRNPK,SCAF11,NCBP3,PTRHD1,ANAPC10,PSMA6,COPS6,PSMA7,NOP10,NSMCE1,PSMD9,MRPS24,MRPS10,SEC13,NEDD1,PFDN6,HPS3,INTS12,BORCS7,TUBA1C,PIH1D1,HSPA6,ITSN2,XPO1,RPL37A,NDUFAF3,LSM6,LSM12,SRSF7,PSMD4,EIF3G,NAA10,LSM14A,TSEN34,RABEPK,MRPL55,MRPS18B,TNPO1
HPA	hippocampus	HPA:0250000	0.0336547	1.47295	6734	79	64	10877	PSMB1,PSMB3,PSMB2,GUK1,EMC7,PSMA1,NUMA1,SRGAP2,VTI1A,SMARCC2,PPM1B,HNRNPK,CNOT9,SCAF11,CLEC16A,PFDN1,ACAP1,PSMA6,IRF3,COPS6,PSMA4,COMMD10,PSMA7,NOP10,PSMD9,MRPS24,MRPS10,RPL11,WDR48,NUTF2,NEDD1,PLEKHA2,PFDN6,HPS3,CNOT11,INTS12,BORCS7,TUBA1C,ABI3,AIMP1,PPP1CA,KCMF1,PIH1D1,MKRN2,HSPA6,VBP1,CCDC93,XPO1,RPL37A,COMMD1,NDUFAF3,ZNF143,LSM6,SRSF7,PSMD4,EIF3G,NAA10,LSM14A,RABEPK,CHMP4B,ARPC5L,MRPL55,MRPS1…
HPA	soft tissue 2; chondrocytes[â‰¥Medium]	HPA:0510112	0.0347342	1.45924	728	79	15	10877	PSMB1,PSMA1,NUMA1,SRGAP2,SMARCC2,ZBTB8OS,CNOT9,SCAF11,NUTF2,NEDD1,INTS12,PIH1D1,COMMD1,NDUFAF3,PSMD4
HPA	fallopian tube; glandular cells[High]	HPA:0210053	0.0348041	1.45837	1771	79	26	10877	PSMB1,PSMB2,PSMA1,NUMA1,SMARCC2,HNRNPK,NCBP3,COPS6,PSMD9,MRPS24,MRPS10,PLEKHA2,HPS3,INTS12,BORCS7,TUBA1C,PIH1D1,XPO1,RPL37A,NDUFAF3,LSM6,EIF3G,LSM14A,MRPL55,MRPS18B,TNPO1
HPA	liver; hepatocytes[â‰¥Low]	HPA:0290401	0.0357881	1.44626	5666	79	57	10877	PSMB1,PSMB3,PSMB2,GUK1,EMC7,PSMA1,NUMA1,SRGAP2,VTI1A,SMARCC2,PPM1B,HNRNPK,CNOT9,SCAF11,CLEC16A,PFDN1,NCBP3,ANAPC10,ACAP1,PSMA6,IRF3,PSMA4,COMMD10,MIEN1,PSMA7,NOP10,NSMCE1,PSMD9,PSMA3,MRPS10,RPL11,NEDD1,HPS3,INTS12,BORCS7,TUBA1C,AIMP1,PPP1CA,PIH1D1,MKRN2,VBP1,CCDC93,ITSN2,RPL37A,COMMD1,NDUFAF3,LSM6,LSM12,SRSF7,PSMD4,TSEN34,RABEPK,CHMP4B,ARPC5L,MRPL55,MRPS18B,TNPO1
HPA	lung; alveolar cells[â‰¥Medium]	HPA:0301172	0.0369357	1.43255	2895	79	36	10877	PSMB1,PSMA1,NUMA1,SMARCC2,ZBTB8OS,HNRNPK,SCAF11,PFDN1,NCBP3,PSMA6,COPS6,PSMA7,PSMD9,PSMA3,MRPS10,WDR48,NEDD1,PLEKHA2,HPS3,INTS12,TUBA1C,VBP1,CCDC93,XPO1,COMMD1,NDUFAF3,LSM6,LSM12,SRSF7,EIF3G,NAA10,LSM14A,TSEN34,MRPL55,MRPS18B,TNPO1
HPA	spleen; cells in red pulp[â‰¥Low]	HPA:0530711	0.0398633	1.39943	5249	79	54	10877	PSMB1,PSMB3,PSMB2,EMC7,PSMA1,NUMA1,SMARCC2,ZBTB8OS,PPM1B,HNRNPK,CNOT9,PFDN1,NCBP3,PTRHD1,ANAPC10,ACAP1,PSMA6,IRF3,COPS6,PSMA4,PSMA7,NOP10,PSMD9,MRPS10,SEC13,WDR48,NEDD1,PLEKHA2,PFDN6,HPS3,INTS12,BORCS7,TUBA1C,ABI3,AIMP1,PPP1CA,PIH1D1,HSPA6,VBP1,XPO1,RPL37A,COMMD1,NDUFAF3,ZNF143,EIF3G,NAA10,LSM14A,TSEN34,RABEPK,CHMP4B,ARPC5L,MRPL55,MRPS18B,TNPO1
HPA	skin 1; Langerhans[â‰¥Medium]	HPA:0460642	0.0440053	1.35649	3159	79	38	10877	PSMB1,PSMB3,PSMB2,PSMA1,NUMA1,SMARCC2,HNRNPK,SCAF11,NCBP3,ACAP1,COPS6,PSMA7,NOP10,PSMD9,MRPS10,WDR48,NEDD1,HPS3,INTS12,BORCS7,TUBA1C,ABI3,PIH1D1,HSPA6,VBP1,ITSN2,XPO1,RPL37A,ZNF143,LSM6,LSM12,SRSF7,EIF3G,LSM14A,RABEPK,MRPL55,MRPS18B,TNPO1
HPA	soft tissue 2	HPA:0510000	0.0463921	1.33356	5132	79	53	10877	PSMB1,PSMB3,GUK1,EMC7,PSMA1,NUMA1,SRGAP2,VTI1A,SMARCC2,ZBTB8OS,PPM1B,HNRNPK,CNOT9,SCAF11,CLEC16A,PFDN1,NCBP3,ACAP1,PSMA6,COPS6,PSMA4,PSMA7,NSMCE1,PSMD9,MRPS24,PSMA3,MRPS10,RPL11,WDR48,NUTF2,NEDD1,HPS3,INTS12,BORCS7,TUBA1C,AIMP1,PIH1D1,NFKB1,HSPA6,VBP1,RPL37A,COMMD1,NDUFAF3,LSM6,PSMD4,NAA10,LSM14A,TSEN34,RABEPK,CHMP4B,MRPL55,MRPS18B,TNPO1
HPA	colon; endothelial cells[â‰¥Low]	HPA:0130201	0.0464312	1.33319	5709	79	57	10877	PSMB1,PSMB3,PSMB2,GUK1,EMC7,PSMA1,NUMA1,SRGAP2,SMARCC2,ZBTB8OS,PPM1B,HNRNPK,SCAF11,CLEC16A,PFDN1,NCBP3,ANAPC10,ARHGEF6,PSMA6,PSMA4,COMMD10,PSMA7,NSMCE1,MRPS24,MRPS10,WDR48,NUTF2,NEDD1,PLEKHA2,HPS3,INTS12,BORCS7,TUBA1C,ABI3,AIMP1,KCMF1,PIH1D1,MKRN2,NFKB1,HSPA6,SNX6,ITSN2,XPO1,NDUFAF3,ZNF143,LSM6,LSM12,SRSF7,PSMD4,EIF3G,NAA10,LSM14A,RABEPK,CHMP4B,MRPL55,MRPS18B,TNPO1
HPA	bone marrow; hematopoietic cells[â‰¥Medium]	HPA:0040082	0.0465854	1.33175	4179	79	46	10877	PSMB1,PSMB3,PSMB2,GUK1,PSMA1,NUMA1,VTI1A,SMARCC2,ZBTB8OS,HNRNPK,NCBP3,PTRHD1,ANAPC10,ACAP1,IRF3,COPS6,PSMA4,PSMA7,NSMCE1,PSMD9,MRPS10,SEC13,RPL11,WDR48,NUTF2,NEDD1,PLEKHA2,INTS12,TUBA1C,AIMP1,KCMF1,PIH1D1,NFKB1,VBP1,XPO1,RPL37A,COMMD1,ZNF143,LSM6,SRSF7,PSMD4,EIF3G,NAA10,MRPL55,MRPS18B,TNPO1
HPA	lymph node; non-germinal center cells[â‰¥Medium]	HPA:0310442	0.048613	1.31325	3925	79	44	10877	PSMB1,PSMB2,PSMA1,NUMA1,SMARCC2,ZBTB8OS,PPM1B,HNRNPK,SCAF11,PFDN1,NCBP3,ARHGEF6,ACAP1,PSMA4,PSMA7,PSMD9,MRPS10,WDR48,NEDD1,PLEKHA2,HPS3,INTS12,BORCS7,TUBA1C,ABI3,AIMP1,PIH1D1,NFKB1,VBP1,XPO1,RPL37A,COMMD1,NDUFAF3,ZNF143,LSM6,LSM12,EIF3G,NAA10,LSM14A,TSEN34,CHMP4B,MRPL55,MRPS18B,TNPO1
CORUM	20S proteasome	CORUM:191	1.515e-10	9.81959	14	76	9	3627	PSMB1,PSMB3,PSMB2,PSMA1,PSMA2,PSMA6,PSMA4,PSMA7,PSMA3
CORUM	PA28gamma-20S proteasome	CORUM:194	3.72434e-10	9.42895	15	76	9	3627	PSMB1,PSMB3,PSMB2,PSMA1,PSMA2,PSMA6,PSMA4,PSMA7,PSMA3
CORUM	26S proteasome	CORUM:181	8.06293e-10	9.09351	22	76	10	3627	PSMB1,PSMB3,PSMB2,PSMA1,PSMA2,PSMA6,PSMA4,PSMA7,PSMA3,PSMD4
CORUM	PA28-20S proteasome	CORUM:192	8.37083e-10	9.07723	16	76	9	3627	PSMB1,PSMB3,PSMB2,PSMA1,PSMA2,PSMA6,PSMA4,PSMA7,PSMA3
CORUM	PA700-20S-PA28 complex	CORUM:193	1.10229e-08	7.95771	36	76	11	3627	PSMB1,PSMB3,PSMB2,PSMA1,PSMA2,PSMA6,PSMA4,PSMA7,PSMD9,PSMA3,PSMD4
CORUM	CCC complex	CORUM:6645	1.81492e-05	4.74114	13	76	6	3627	COMMD6,COMMD5,COMMD10,COMMD7,CCDC93,COMMD1
CORUM	CCC-Wash (WASH1, FAM21C) complex	CORUM:6639	5.11969e-05	4.29076	15	76	6	3627	COMMD6,COMMD5,COMMD10,COMMD7,CCDC93,COMMD1
CORUM	LSm1-7 complex	CORUM:561	0.00101799	2.99226	7	76	4	3627	LSM7,LSM5,LSM6,LSM4
CORUM	LSm2-8 complex	CORUM:562	0.00101799	2.99226	7	76	4	3627	LSM7,LSM5,LSM6,LSM4
CORUM	CCDC93-COMMD1-COMMD6 complex	CORUM:7133	0.00151499	2.81959	3	76	3	3627	COMMD6,CCDC93,COMMD1
CORUM	Ubiquilin-proteasome complex	CORUM:5209	0.0289483	1.53838	6	76	3	3627	PSMA1,PSMA2,PSMA6
CORUM	Prefoldin complex	CORUM:33	0.0289483	1.53838	6	76	3	3627	PFDN1,PFDN6,VBP1
CORUM	Prefoldin complex	CORUM:112	0.0289483	1.53838	6	76	3	3627	PFDN1,PFDN6,VBP1
[truncated: 64 more columns]
