# Supplementary material for: Comparative Genomic Analysis of the DUF34 Protein Family Suggests Role as a Metal Ion Chaperone or Insertase
Source: Preprints.org preprint supplement (doi:10.20944/preprints202107.0280.v1), 2021-07-13
Supplement: Supplementary file 3 [file Data Table 11.xlsx]

## Sheet: Content
	Data Table 11		Reed et al., 2021
	Concatenated list of sequences indicated to be possible non-canonical fusions of the DUF34 family:
	a	master concatenated list of exported domain architecture data of the DUF34 family from Pfam, InterPro, and UniProt (for each method’s exported data, annotations were completed for all rows)
	b	concatenated list of exported sequences for each of the three methods with duplicates removed (duplicates determined relative to the UniProt family-driven method, then, as a secondary option, the InterPro based method)
	c	counts for assigned classes and subclasses of domain families listed in b

## Sheet: a
Fusion Class	Fusion Note/Fusion Subclass	Source Method	Validation Status	Exported Identifiers	Pfam(s)	InterPro ID(s)	Member Sequence(s)	GenBank CDS/RefSeq	Organism	Protein names	Gene names	Duplicate	Method(s) (if duplicate)	COG Retrieval (EggNOG)	COG(s)
RNase H		Literature Review/Data Capture	Invalid	NA	PF01784;PF13456;	IPR002678;IPR036069;IPR015867;IPR012337;﻿IPR002156;IPR036397;	A0A523BTI2	TDA65818.1	Clostridia bacterium	GTP cyclohydrolase 1 type 2 homolog	D9V47_11990				COG3323;COG0327;COG0328;COG3341;
NUDIX hydrolase	NUDIX hydrolase domain	Literature Review/Data Capture	Valid	NA	PF00293;	IPR036069;IPR003562;IPR015867;IPR015797;IPR020084;IPR000086;	Q8R6E6	AAL93890.1	Fusobacterium nucleatum subsp. nucleatum (strain ATCC 25586 / DSM 15643 / BCRC 10681 / CIP 101130 / JCM 8532 / KCTC 2640 / LMG 13131 / VPI 4355)	Mutator MutT protein	FN1791	Reference (non-duplicate)	NA	Sequence	COG3323;COG1051;COG0494;COG2816;
CIAO1/Cia1	WD40 repeat	UniProt Fam - pfam/interpro	Valid	NA	PF01784;PF00400;	IPR002678;IPR036069;IPR015943;IPR001680;IPR019775;IPR017986;IPR036322;	A0A067R4D1	KDR18041.1	Zootermopsis nevadensis	NIF3-like protein 1	L798_07717	Reference (non-duplicate)	NA	Sequence	COG0327;COG3323;COG2319;COG4916;COG3638;
CIAO1/Cia1	WD40 repeat	UniProt Fam - pfam/interpro	Valid	NA	PF01784;PF00400;	IPR028608;IPR002678;IPR036069;IPR015943;IPR001680;IPR019775;IPR017986;IPR036322;	A0A151JYK8	KYN40944.1	Trachymyrmex septentrionalis	Probable cytosolic iron-sulfur protein assembly protein Ciao1	Ciao1 ALC56_04640	Reference (non-duplicate)	NA	Sequence	COG2319;COG0327;COG3323;COG4916;COG3638;
CIAO1/Cia1	WD40 repeat	UniProt Fam - pfam/interpro	Valid	NA	PF01784;PF00400;	IPR028608;IPR002678;IPR036069;IPR015943;IPR001680;IPR019775;IPR017986;IPR036322;	A0A0L7LPT1	KOB77528.1	Operophtera brumata	Probable cytosolic iron-sulfur protein assembly protein Ciao1	Ciao1 OBRU01_03987	Reference (non-duplicate)	NA	Sequence	COG2319;COG4916;COG0327;COG3638;COG4946;COG3323;
CIAO1/Cia1	WD40 repeat	UniProt Fam - pfam/interpro	Valid	NA	PF01784;PF00400;	IPR028608;IPR002678;IPR036069;IPR015943;IPR001680;IPR019775;IPR017986;IPR036322;	A0A195BDN2	KYM82290.1	Atta colombica	Probable cytosolic iron-sulfur protein assembly protein Ciao1	Ciao1 ALC53_07293	Reference (non-duplicate)	NA	Sequence	COG2319;COG0327;COG3323;COG4916;COG3638;
CIAO1/Cia1	WD40 repeat	UniProt Fam - pfam/interpro	Valid	NA	PF01784;PF00400;	IPR028608;IPR002678;IPR036069;IPR015943;IPR001680;IPR019775;IPR017986;IPR036322;	A0A139WBU3	KYB25409.1	Tribolium castaneum	Probable cytosolic iron-sulfur protein assembly protein Ciao1	Ciao1 TcasGA2_TC031250	Reference (non-duplicate)	NA	Sequence	COG2319;COG0327;COG3323;COG4916;COG3638;COG1162;COG4946;
CIAO1/Cia1	WD40 repeat	UniProt Fam - pfam/interpro	Valid	NA	PF01784;PF00400;	IPR028608;IPR002678;IPR036069;IPR015943;IPR001680;IPR019775;IPR017986;IPR036322;	E9IGK1	EFZ20289.1	Solenopsis invicta	WD	SINV_00781	Reference (non-duplicate)	NA	Sequence	COG2319;COG0327;COG3323;COG4916;COG4946;
CIAO1/Cia1	WD40 repeat	UniProt Fam - pfam/interpro	Valid	NA	PF01784;PF00400;	IPR028608;IPR020472;IPR002678;IPR036069;IPR015943;IPR001680;IPR019775;IPR017986;IPR036322;	A0A6G0TSX2	KAE9538145.1	Aphis glycines	Probable cytosolic iron-sulfur protein assembly protein Ciao1	Ciao1 AGLY_006117	Reference (non-duplicate)	NA	Sequence	COG2319;COG0327;COG3323;COG4916;
CIAO1/Cia1	WD40 repeat	UniProt Fam - pfam/interpro	Valid	NA	PF01784;PF00400;	IPR028608;IPR002678;IPR036069;IPR015943;IPR001680;IPR019775;IPR017986;IPR036322;	A0A0N7Z9M2	JAI56440.1	Rhodnius neglectus	Probable cytosolic iron-sulfur protein assembly protein Ciao1	JAI56440.1	Reference (non-duplicate)	NA	Sequence	COG2319;COG0327;COG3323;COG4916;
CIAO1/Cia1	WD40 repeat	UniProt Fam - pfam/interpro	Valid	NA	PF01784;PF00400;	IPR028608;IPR020472;IPR002678;IPR036069;IPR015943;IPR001680;IPR019775;IPR017986;IPR036322;	A0A3L8DRM5	RLU23051.1	Ooceraea biroi	Probable cytosolic iron-sulfur protein assembly protein Ciao1	Ciao1 DMN91_005329	Reference (non-duplicate)	NA	Sequence	COG2319;COG0327;COG3323;COG4916;
CIAO1/Cia1	WD40 repeat	UniProt Fam - pfam/interpro	Valid	NA	PF01784;PF00400;	IPR028608;IPR002678;IPR036069;IPR015943;IPR001680;IPR019775;IPR017986;IPR036322;	A0A232F013	OXU23758.1	Trichomalopsis sarcophagae	WD	TSAR_007269	Reference (non-duplicate)	NA	Sequence	COG2319;COG0327;COG3323;COG4916;COG4946;COG3638;
CIAO1/Cia1	WD40 repeat	UniProt Fam - pfam/interpro	Valid	NA	PF01784;PF00400;	IPR028608;IPR002678;IPR036069;IPR015943;IPR001680;IPR019775;IPR017986;IPR036322;	A0A4S2KYR3	TGZ55221.1	Temnothorax longispinosus	Putative cytosolic iron-sulfur protein assembly protein Ciao1 (Fragment)	DBV15_05086	Reference (non-duplicate)	NA	Sequence	COG2319;COG0327;COG3323;COG4916;
CIAO1/Cia1	WD40 repeat	UniProt Fam - pfam/interpro	Valid	NA	PF01784;PF00400;	IPR028608;IPR002678;IPR036069;IPR015943;IPR001680;IPR019775;IPR017986;IPR036322;	A0A6V7GMX5	CAD0391481.1	Cotesia congregata	Probable cytosolic iron-sulfur protein assembly protein Ciao1	Ciao1 CCMSTLAB_LOCUS12147	Reference (non-duplicate)	NA	Sequence	COG2319;COG0327;COG3323;COG4916;COG3638;
Acetyltransferase	Histone acetyltransferase	UniProt Fam - pfam/interpro	Valid	NA	PF01853;PF01784;PF11717;PF17772;	IPR016181;IPR016197;IPR002678;IPR036069;IPR002717;IPR037906;IPR025995;IPR036388;IPR040706;	A0A182JW27	KB703659.1	Anopheles christyi	Histone acetyltransferase (EC 2.3.1.48)	AchrA1:KB703659.1	Reference (non-duplicate)	NA	Sequence	COG0327;COG3323;
Acetyltransferase	Histone acetyltransferase	UniProt Fam - pfam/interpro	Valid	NA	PF01853;PF01784;PF11717;PF17772;	IPR016181;IPR016197;IPR002678;IPR036069;IPR002717;IPR037906;IPR025995;IPR036388;IPR040706;	A0A182W9B5	KB663677.1	Anopheles minimus	Histone acetyltransferase (EC 2.3.1.48)	AminM1:KB663677.1	Reference (non-duplicate)	NA	Sequence	COG0327;COG3323;
Acetyltransferase	Histone acetyltransferase	UniProt Fam - pfam/interpro	Valid	NA	PF01853;PF01784;PF11717;PF17772;	IPR016181;IPR016197;IPR002678;IPR036069;IPR002717;IPR037906;IPR025995;IPR036388;IPR040706;	A0A182WZB9	KB665599.1	Anopheles quadriannulatus	Histone acetyltransferase (EC 2.3.1.48)	AquaS1:KB665599.1	Reference (non-duplicate)	NA	Sequence	COG0327;COG3323;
Acetyltransferase	GNAT family N-acetyltransferase	UniProt Fam - pfam/interpro	Invalid	NA	PF00583;PF01784;	IPR016181;IPR000182;IPR002678;IPR036069;	A0A7C5ASG6	HGZ17905.1	Chloroflexi bacterium	GNAT family N-acetyltransferase	ENW85_02355	Reference (non-duplicate)	NA	Sequence	COG0327;COG3393;COG1247;COG4552;COG1246;
Acetyltransferase	GNAT family N-acetyltransferase	UniProt Fam - pfam/interpro	Invalid	NA	PF00583;PF01784;	IPR016181;IPR000182;IPR002678;IPR036069;	A0A7C3R0U3	HFU31474.1	Chloroflexi bacterium	GNAT family N-acetyltransferase	ENY06_15340	Reference (non-duplicate)	NA	Sequence	COG0327;COG3393;COG3323;COG1246;COG0454;COG1247;COG4552;COG3153;
Acetyltransferase	GNAT family N-acetyltransferase	UniProt Fam - pfam/interpro	Invalid	NA	PF00583;PF01784;	IPR016181;IPR000182;IPR002678;IPR036069;	A0A7C6TES9	HHX43382.1	Chloroflexi bacterium	GNAT family N-acetyltransferase	GX714_05255	Reference (non-duplicate)	NA	Sequence	COG0327;COG3393;COG1246;COG4552;COG1247;COG3323;COG0454;COG2153;
Pterin-binding		UniProt Fam - pfam/interpro	Invalid	NA	PF01784;	IPR002678;IPR036069;IPR000489;	A0A1I2JED0	SFF53212.1	Clostridium cadaveris	GTP cyclohydrolase 1 type 2 homolog	DBY38_12830 SAMN04487885_1025	Reference (non-duplicate)	NA	Sequence	COG0327;COG3323;
Pterin-binding		UniProt Fam - pfam/interpro	Invalid	NA	PF01784;	IPR002678;IPR036069;IPR000489;	A0A151BI26	KYH39498.1	Candidatus Bathyarchaeota archaeon B26-2	NGG1p interacting factor 3	AYL32_015970	Reference (non-duplicate)	NA	Sequence	COG0327;COG3323;
FAD-/NAD-binding	UCP036654; FAD binding domain-containing flavoprotein	UniProt Fam - pfam/interpro	Valid	NA	PF00890;PF01784;	IPR003953;IPR036188;IPR002678;IPR036069;IPR027477;IPR014614;	A0A5N6H8H9	KAB8250528.1	Aspergillus flavus	FAD binding domain-containing protein	BDV35DRAFT_377281	Reference (non-duplicate)	NA	Sequence	COG3573;COG0327;COG3323;COG1053;COG0665;COG0029;COG1232;COG0644;COG3976;COG0654;COG1231;COG0492;COG3349;COG1635;COG1206;
FAD-/NAD-binding	UCP036654; FAD binding domain-containing flavoprotein	UniProt Fam - pfam/interpro	Valid	NA	PF00890;PF01784;	IPR003953;IPR036188;IPR002678;IPR036069;IPR014614;	A0A5N6YEJ2	KAE8343874.1	Aspergillus arachidicola	FAD	BDV24DRAFT_149442	Reference (non-duplicate)	NA	Sequence	COG3573;COG0327;COG1053;COG3323;COG0665;COG0029;COG0644;COG1232;COG1231;COG3976;COG0654;COG3349;COG0492;COG1635;COG1206;COG2906;COG3075;
FAD-/NAD-binding	UCP036654; FAD binding domain-containing flavoprotein	UniProt Fam - pfam/interpro	Valid	NA	PF00890;PF01784;	IPR003953;IPR036188;IPR002678;IPR036069;IPR027477;IPR014614;	A0A5N7A682	KAE8365342.1	Aspergillus caelatus	FAD binding domain-containing protein	BDV27DRAFT_144570	Reference (non-duplicate)	NA	Sequence	COG3573;COG0327;COG3323;COG1053;COG0029;COG0665;COG3976;COG1232;COG0644;COG0492;COG0654;COG1231;COG3349;COG1635;COG2509;
FAD-/NAD-binding	UCP036654; FAD binding domain-containing flavoprotein	UniProt Fam - pfam/interpro	Valid	NA	PF00890;PF01784;	IPR003953;IPR036188;IPR002678;IPR036069;IPR027477;IPR014614;	A0A5N6IWR4	KAB8271121.1	Aspergillus minisclerotigenes	FAD binding domain-containing protein	BDV30DRAFT_228336	Reference (non-duplicate)	NA	Sequence	COG3573;COG0327;COG3323;COG1053;COG0665;COG0029;COG1232;COG0644;COG0492;COG0654;COG3349;COG1231;COG3976;COG1635;COG1206;COG2509;
FAD-/NAD-binding	UCP036654; FAD binding domain-containing flavoprotein	UniProt Fam - pfam/interpro	Valid	NA	PF00890;PF01784;	IPR003953;IPR036188;IPR002678;IPR036069;IPR027477;IPR014614;	A0A5N6DQ14	KAB8207241.1	Aspergillus parasiticus	FAD binding domain-containing protein	BDV34DRAFT_211822	Reference (non-duplicate)	NA	Sequence	COG3573;COG0327;COG3323;COG1053;COG0029;COG0665;COG1232;COG3976;COG0644;COG0492;COG0654;COG3349;COG1231;COG1635;COG1233;COG1206;
FAD-/NAD-binding	UCP036654; FAD binding domain-containing flavoprotein	UniProt Fam - pfam/interpro	Valid	NA	PF00890;PF01784;	IPR003953;IPR036188;IPR002678;IPR036069;IPR014614;	A0A5N6V5R0	KAE8166133.1	Aspergillus tamarii	GTP cyclohydrolase 1 type 2/Nif3	BDV40DRAFT_285789	Reference (non-duplicate)	NA	Sequence	COG3573;COG0327;COG1053;COG3323;COG0029;COG0665;COG1232;COG0644;COG0654;COG3976;COG0492;COG1231;COG1635;COG3349;COG0446;COG2509;COG1233;
FAD-/NAD-binding	UCP036654; FAD binding domain-containing flavoprotein	UniProt Fam - pfam/interpro	Valid	NA	PF00890;PF01784;	IPR003953;IPR036188;IPR002678;IPR036069;IPR027477;IPR014614;	A0A5N7DQG0	KAE8408279.1	Aspergillus pseudonomius	GTP cyclohydrolase 1 type 2/Nif3	BDV37DRAFT_296464	Reference (non-duplicate)	NA	Sequence	COG3573;COG0327;COG3323;COG1053;COG0665;COG0029;COG1232;COG0644;COG3349;COG0654;COG0492;COG1231;COG3976;COG1635;COG1206;
FAD-/NAD-binding	UCP036654; FAD binding domain-containing flavoprotein	UniProt Fam - pfam/interpro	Valid	NA	PF00890;PF01784;	IPR003953;IPR036188;IPR002678;IPR036069;IPR014614;	A0A5N6F509	KAB8224747.1	Aspergillus novoparasiticus	FAD binding domain-containing protein	BDV33DRAFT_233137	Reference (non-duplicate)	NA	Sequence	COG3573;COG0327;COG3323;COG1053;COG0665;COG0029;COG1232;COG0644;COG3976;COG0654;COG0492;COG3349;COG1231;COG1635;
FAD-/NAD-binding	UCP036654; FAD binding domain-containing flavoprotein	UniProt Fam - pfam/interpro	Valid	NA	PF00890;PF01784;	IPR003953;IPR036188;IPR002678;IPR036069;IPR027477;IPR014614;	A0A5N6VPU0	KAE8310206.1	Aspergillus transmontanensis	FAD binding domain-containing protein	BDV41DRAFT_566708	Reference (non-duplicate)	NA	Sequence	COG3573;COG0327;COG3323;COG1053;COG0029;COG0665;COG0644;COG1232;COG3976;COG0492;COG0654;COG1635;COG1231;COG3349;
FAD-/NAD-binding	UCP036654; FAD binding domain-containing flavoprotein	UniProt Fam - pfam/interpro	Valid	NA	PF00890;PF01784;	IPR003953;IPR036188;IPR002678;IPR036069;IPR014614;	A0A5N7DZX5	KAE8411905.1	Aspergillus pseudocaelatus	FAD binding domain-containing protein	BDV36DRAFT_288317	Reference (non-duplicate)	NA	Sequence	COG3573;COG0327;COG3323;COG1053;COG0029;COG0665;COG1232;COG0644;COG1232;COG0644;COG3976;COG0492;COG0654;COG1231;COG3349;COG1635;COG2509;
FAD-/NAD-binding	UCP036654; FAD binding domain-containing flavoprotein	UniProt Fam - pfam/interpro	Valid	NA	PF00890;PF01784;	IPR003953;IPR036188;IPR002678;IPR036069;IPR027477;IPR014614;	A0A5N6HY31	KAB8259355.1	Aspergillus pseudonomius	GTP cyclohydrolase 1 type 2/Nif3	BDV32DRAFT_138898	Reference (non-duplicate)	NA	Sequence	COG3573;COG0327;COG3323;COG1053;COG0665;COG0029;COG1232;COG0644;COG0654;COG0492;COG3349;COG3976;COG1231;COG1635;COG1206;
FAD-/NAD-binding	UCP036654; FAD binding domain-containing flavoprotein	UniProt Fam - pfam/interpro	Valid	NA	PF00890;PF01784;	IPR003953;IPR036188;IPR002678;IPR036069;IPR027477;IPR014614;	A0A0F0I4C6	KJK62580.1	Aspergillus parasiticus	NIF3 NGG1p interacting factor 3	P875_00095268	Reference (non-duplicate)	NA	Sequence	COG3573;COG0327;COG3323;COG1053;COG0029;COG0665;COG1232;COG3976;COG0644;COG0654;COG3349;COG0492;COG1635;
FAD-/NAD-binding	UCP036654; FAD binding domain-containing flavoprotein	UniProt Fam - pfam/interpro	Valid	NA	PF00890;PF01784;	IPR003953;IPR036188;IPR002678;IPR036069;IPR014614;	A0A5N6XDM1	KAE8331341.1	Aspergillus sergii	FAD binding domain-containing protein	BDV39DRAFT_218683	Reference (non-duplicate)	NA	Sequence	COG3573;COG0327;COG3323;COG1053;COG0029;COG0665;COG3976;COG1232;COG0644;COG0492;COG0654;COG3349;COG1231;COG1635;
TAT signal		UniProt Fam - pfam/interpro	Invalid	NA	PF01784;	IPR002678;IPR036069;IPR006311;	A0A6L7YT22	MYE63207.1	Rhodothermaceae bacterium	NGG1p interacting factor NIF3	F4X29_07900	Reference (non-duplicate)	NA	Sequence	COG0327;COG3323;
TAT signal		UniProt Fam - pfam/interpro	Valid	NA	PF01784;	IPR002678;IPR036069;IPR006311;	A0A6G9AI40	QIP11976.1	Spirosoma sp. BT328	NGG1p interacting factor NIF3	G8759_04680	Reference (non-duplicate)	NA	Sequence	COG0327;COG3323;
TAT signal		UniProt Fam - pfam/interpro	Valid	NA	PF01784;	IPR002678;IPR036069;IPR006311;	A0A6G9AI74	QIP12150.1	Spirosoma sp. BT328	Uncharacterized protein	G8759_05640	Reference (non-duplicate)	NA	Sequence	COG0327;COG3323;
TAT signal		UniProt Fam - pfam/interpro	Valid	NA	PF01784;	IPR002678;IPR036069;IPR006311;	A0A6P1W9J2	QHW01073.1	Spirosoma sp. I-24	NGG1p interacting factor NIF3	GJR95_41275	Reference (non-duplicate)	NA	Sequence	COG0327;COG3323;
TAT signal		UniProt Fam - pfam/interpro	Valid	NA	PF01784;	IPR002678;IPR036069;IPR006311;	A0A6P1VTA4	QHV95220.1	Spirosoma sp. I-24	Uncharacterized protein	GJR95_09440	Reference (non-duplicate)	NA	Sequence	COG0327;COG3323;
TAT signal		UniProt Fam - pfam/interpro	Invalid	NA	PF01784;	IPR002678;IPR036069;IPR006311;	A0A1F5YGI6	OGF99243.1	Candidatus Glassbacteria bacterium GWA2	Uncharacterized protein	A2Z86_12335	Reference (non-duplicate)	NA	Sequence	COG0327;
TAT signal		UniProt Fam - pfam/interpro	Valid	NA	PF01784;	IPR002678;IPR036069;IPR006311;	A0A4R6T5A0	TDQ14680.1	Algoriphagus boseongensis	Putative NIF3 family GTP cyclohydrolase 1 type 2	DFQ04_3270	Reference (non-duplicate)	NA	Sequence	COG0327;COG3323;
TAT signal		UniProt Fam - pfam/interpro	Invalid	NA	PF01784;	IPR002678;IPR036069;IPR006311;	A0A6L8CAG2	MYG44830.1	Rhodothermaceae bacterium	NGG1p interacting factor NIF3	F4159_06880	Reference (non-duplicate)	NA	Sequence	COG0327;COG3323;
TAT signal		UniProt Fam - pfam/interpro	Valid	NA	PF01784;	IPR002678;IPR036069;IPR006311;	A0A1T4MH81	SJZ66211.1	Chitinophaga eiseniae	Putative GTP cyclohydrolase 1 type 2, NIF3 family	SAMN04488128_1011111	Reference (non-duplicate)	NA	Sequence	COG0327;COG3323;
TAT signal		UniProt Fam - pfam/interpro	Valid	NA	PF01784;	IPR002678;IPR036069;IPR006311;	A0A1G6XWC5	SDD82420.1	Dyadobacter soli	Putative GTP cyclohydrolase 1 type 2, NIF3 family	SAMN04487996_102279	Reference (non-duplicate)	NA	Sequence	COG0327;COG3323;
TAT signal		UniProt Fam - pfam/interpro	Valid	NA	PF01784;	IPR002678;IPR036069;IPR006311;	C7PFT1	ACU63493.1	Chitinophaga pinensis	Uncharacterized protein	Cpin_6084	Reference (non-duplicate)	NA	Sequence	COG0327;COG3323;
TAT signal		UniProt Fam - pfam/interpro	Valid	NA	PF01784;	IPR002678;IPR036069;IPR006311;	A0A1H8LLP4	SEO05698.1	Mucilaginibacter gossypiicola	Putative GTP cyclohydrolase 1 type 2, NIF3 family	SAMN05192574_105139	Reference (non-duplicate)	NA	Sequence	COG0327;COG3323;
TAT signal		UniProt Fam - pfam/interpro	Valid	NA	PF01784;	IPR002678;IPR036069;IPR006311;	A0A1G7S7F2	SDG18100.1	Chitinophaga filiformis	Putative GTP cyclohydrolase 1 type 2, NIF3 family	SAMN04488121_103738	Reference (non-duplicate)	NA	Sequence	COG0327;COG3323;
TAT signal		UniProt Fam - pfam/interpro	Valid	NA	PF01784;	IPR002678;IPR036069;IPR006311;	A0A1H7V0N0	SEM02696.1	Chitinophaga rupis	Putative GTP cyclohydrolase 1 type 2, NIF3 family	SAMN04488505_103173	Reference (non-duplicate)	NA	Sequence	COG0327;COG3323;
TAT signal		UniProt Fam - pfam/interpro	Valid	NA	PF01784;	IPR002678;IPR036069;IPR006311;	A0A385SRC0	AYB33402.1	Chryseolinea soli	NGG1p interacting factor NIF3	D4L85_23675	Reference (non-duplicate)	NA	Sequence	COG0327;COG3323;
TAT signal		UniProt Fam - pfam/interpro	Valid	NA	PF01784;	IPR002678;IPR036069;IPR006311;IPR019546;	A0A3E1NP16	RFM29663.1	Deminuibacter soli	Uncharacterized protein	DXN05_01385	Reference (non-duplicate)	NA	Sequence	COG0327;COG3323;
TAT signal		UniProt Fam - pfam/interpro	Valid	NA	PF01784;	IPR002678;IPR036069;IPR006311;	A0A372NQD0	RFZ90860.1	Mucilaginibacter sp. MYSH2	Uncharacterized protein	D0C36_18085	Reference (non-duplicate)	NA	Sequence	COG0327;COG3323;
TAT signal		UniProt Fam - pfam/interpro	Valid	NA	PF01784;	IPR002678;IPR036069;IPR006311;	A0A2W7RIP2	PZX60264.1	Algoriphagus ratkowskyi	Putative NIF3 family GTP cyclohydrolase 1 type 2	LV84_00536	Reference (non-duplicate)	NA	Sequence	COG0327;COG3323;
TAT signal		UniProt Fam - pfam/interpro	Valid	NA	PF01784;	IPR002678;IPR036069;IPR006311;	A0A1Q6A399	OKS88478.1	Mucilaginibacter polytrichastri	Uncharacterized protein	RG47T_3945	Reference (non-duplicate)	NA	Sequence	COG0327;COG3323;
TAT signal		UniProt Fam - pfam/interpro	Valid	NA	PF01784;	IPR002678;IPR036069;IPR006311;	A0A1M5JJA3	SHG40611.1	Chryseolinea serpens	Putative GTP cyclohydrolase 1 type 2, NIF3 family	SAMN04488109_0096	Reference (non-duplicate)	NA	Sequence	COG0327;COG3323;
TAT signal		UniProt Fam - pfam/interpro	Valid	NA	PF01784;	IPR002678;IPR036069;IPR006311;	A0A4Q2UKI2	RYC68005.1	Spirosoma sordidisoli	NGG1p interacting factor NIF3	EQG79_21355	Reference (non-duplicate)	NA	Sequence	COG0327;COG3323;
TAT signal		UniProt Fam - pfam/interpro	Valid	NA	PF01784;	IPR002678;IPR036069;IPR006311;	A0A1H8RCW6	SEO64107.1	Mucilaginibacter sp. OK283	Putative GTP cyclohydrolase 1 type 2, NIF3 family	SAMN05428947_103233	Reference (non-duplicate)	NA	Sequence	COG0327;COG3323;
TAT signal		UniProt Fam - pfam/interpro	Valid	NA	PF01784;	IPR002678;IPR036069;IPR006311;	I3ZKN1	AFL89799.1	Terriglobus roseus (strain DSM 18391 / NRRL B-41598 / KBS 63)	Uncharacterized protein	Terro_3585	Reference (non-duplicate)	NA	Sequence	COG0327;COG3323;
TAT signal		UniProt Fam - pfam/interpro	Valid	NA	PF01784;	IPR002678;IPR036069;IPR006311;	A0A369Q9C6	RDC61493.1	Adhaeribacter pallidiroseus	Uncharacterized protein	AHMF7616_00072	Reference (non-duplicate)	NA	Sequence	COG0327;COG3323;
TAT signal		UniProt Fam - pfam/interpro	Invalid	NA	PF01784;	IPR002678;IPR036069;IPR006311;	A0A3D4P3N1	HCS49188.1	Candidatus Aminicenantes bacterium	Uncharacterized protein	DIW61_13415	Reference (non-duplicate)	NA	Sequence	COG0327;COG3323;
TAT signal		UniProt Fam - pfam/interpro	Valid	NA	PF01784;	IPR002678;IPR036069;IPR006311;	A0A316H9T0	PWK77939.1	Mucilaginibacter oryzae	Putative NIF3 family GTP cyclohydrolase 1 type 2	LX99_02824	Reference (non-duplicate)	NA	Sequence	COG0327;COG3323;
TAT signal		UniProt Fam - pfam/interpro	Valid	NA	PF01784;	IPR002678;IPR036069;IPR006311;	A0A5B8V0H9	QEC64739.1	Mucilaginibacter ginsenosidivorans	NGG1p interacting factor NIF3	FRZ54_19950	Reference (non-duplicate)	NA	Sequence	COG0327;COG3323;
TAT signal		UniProt Fam - pfam/interpro	Valid	NA	PF01784;	IPR002678;IPR036069;IPR006311;IPR019546;	A0A5E7XYB9	VVS99181.1	Imperialibacter sp. EC-SDR9	NGG1p interacting factor NIF3	IMPR6_100051	Reference (non-duplicate)	NA	Sequence	COG0327;COG3323;
TAT signal		UniProt Fam - pfam/interpro	Valid	NA	PF01784;	IPR002678;IPR036069;IPR006311;	W6TJ81	ETZ19222.1	Pedobacter sp. V48	Uncharacterized protein	N824_10800	Reference (non-duplicate)	NA	Sequence	COG0327;
TAT signal		UniProt Fam - pfam/interpro	Valid	NA	PF01784;	IPR002678;IPR036069;IPR006311;	A0A1E8FI44	OFI35610.1	Alteromonas lipolytica	Uncharacterized protein	BFC17_12705	Reference (non-duplicate)	NA	Sequence	COG0327;COG3323;
TAT signal		UniProt Fam - pfam/interpro	Valid	NA	PF01784;	IPR002678;IPR036069;IPR006311;	A0A4R8D515	TDW85622.1	Larkinella sp. BK230	Putative NIF3 family GTP cyclohydrolase 1 type 2	EV590_1095	Reference (non-duplicate)	NA	Sequence	COG0327;COG3323;
TAT signal		UniProt Fam - pfam/interpro	Invalid	NA	PF01784;	IPR002678;IPR036069;IPR006311;	A0A1M3HPL1	OJW60651.1	Sphingobacteriales bacterium 50-39	NGG1p interacting factor NIF3	BGO55_29375	Reference (non-duplicate)	NA	Sequence	COG0327;COG3323;
TAT signal		UniProt Fam - pfam/interpro	Invalid	NA	PF01784;	IPR002678;IPR036069;IPR006311;IPR019546;	A0A1Q4FBP0	OJY90482.1	Sphingobacteriales bacterium 44-15	NGG1p interacting factor NIF3	BGP14_11525	Reference (non-duplicate)	NA	Sequence	COG0327;COG3323;
TAT signal		UniProt Fam - pfam/interpro	Valid	NA	PF01784;	IPR002678;IPR036069;IPR006311;	A0A2T7BE44	PUZ23300.1	Chitinophaga parva	Uncharacterized protein	DCC81_23205	Reference (non-duplicate)	NA	Sequence	COG0327;COG3323;
TAT signal		UniProt Fam - pfam/interpro	Invalid	NA	PF01784;	IPR002678;IPR036069;IPR006311;	A0A317J430	PWU06375.1	Acidobacteriia bacterium	Uncharacterized protein	C5B51_12345	Reference (non-duplicate)	NA	Sequence	COG0327;COG3323;
TAT signal		UniProt Fam - pfam/interpro	Invalid	NA	PF01784;	IPR002678;IPR036069;IPR006311;	A0A1Q3P559	OJV12737.1	Dyadobacter sp. 50-39	Uncharacterized protein	BGO21_03055	Reference (non-duplicate)	NA	Sequence	COG0327;COG3323;
TAT signal		UniProt Fam - pfam/interpro	Valid	NA	PF01784;	IPR002678;IPR036069;IPR006311;	A0A364WF81	RAV54291.1	Mucilaginibacter rubeus	NGG1p interacting factor NIF3	DIU36_20780	Reference (non-duplicate)	NA	Sequence	COG0327;COG3323;
TAT signal		UniProt Fam - pfam/interpro	Valid	NA	PF01784;	IPR002678;IPR036069;IPR006311;IPR019546;	A0A5C1I1G4	QEM11763.1	Mucilaginibacter rubeus	Twin-arginine translocation signal domain-containing protein	DEO27_017600	Reference (non-duplicate)	NA	Sequence	COG0327;COG3323;
TAT signal		UniProt Fam - pfam/interpro	Valid	NA	PF01784;	IPR002678;IPR036069;IPR006311;	A0A2P8G2Q5	PSL28263.1	Chitinophaga ginsengisoli	Putative NIF3 family GTP cyclohydrolase 1 type 2	CLV42_108182	Reference (non-duplicate)	NA	Sequence	COG0327;COG3323;
TAT signal		UniProt Fam - pfam/interpro	Valid	NA	PF01784;	IPR002678;IPR036069;IPR006311;	A0A372IJ62	RFU14781.1	Acidipila sp. 4G-K13	Uncharacterized protein	D0Y96_20235	Reference (non-duplicate)	NA	Sequence	COG0327;COG3323;
TAT signal		UniProt Fam - pfam/interpro	Valid	NA	PF01784;	IPR002678;IPR036069;IPR006311;	A0A1I5I0S0	SFO53641.1	Chitinophaga sp. YR627	Putative GTP cyclohydrolase 1 type 2, NIF3 family	SAMN05428949_5632	Reference (non-duplicate)	NA	Sequence	COG0327;COG3323;
TAT signal		UniProt Fam - pfam/interpro	Valid	NA	PF01784;	IPR002678;IPR036069;IPR006311;	A0A6C0GR62	QHT69990.1	Rhodocytophaga sp. 172606-1	NGG1p interacting factor NIF3	GXP67_26770	Reference (non-duplicate)	NA	Sequence	COG0327;COG3323;
TAT signal		UniProt Fam - pfam/interpro	Invalid	NA	PF01784;	IPR002678;IPR036069;IPR006311;	A0A7C3LJV2	HFS53611.1	Planctomycetes bacterium	Uncharacterized protein (Fragment)	ENR24_06545	Reference (non-duplicate)	NA	Sequence	COG0327;COG3323;
TAT signal		UniProt Fam - pfam/interpro	Invalid	NA	PF01784;	IPR002678;IPR036069;IPR006311;	A0A4Q3FEM9	RYE30883.1	Sphingobacteriaceae bacterium	NGG1p interacting factor NIF3	EOP42_11445	Reference (non-duplicate)	NA	Sequence	COG0327;COG3323;
TAT signal		UniProt Fam - pfam/interpro	Invalid	NA	PF01784;	IPR002678;IPR036069;IPR006311;	A0A4Q6EDD6	RZA01790.1	Sphingobacteriaceae bacterium	NGG1p interacting factor NIF3	EOP47_09310	Reference (non-duplicate)	NA	Sequence	COG0327;COG3323;
TAT signal		UniProt Fam - pfam/interpro	Valid	NA	PF01784;	IPR002678;IPR036069;IPR006311;	A0A1H7B9G1	SEJ73524.1	Dyadobacter sp. SG02	Putative GTP cyclohydrolase 1 type 2, NIF3 family	SAMN05216327_117175	Reference (non-duplicate)	NA	Sequence	COG0327;COG3323;
TAT signal		UniProt Fam - pfam/interpro	Valid	NA	PF01784;	IPR002678;IPR036069;IPR006311;	A0A372IV29	RFU18651.1	Acidipila sp. 4G-K13	Uncharacterized protein	D0Y96_03660	Reference (non-duplicate)	NA	Sequence	COG0327;COG3323;
TAT signal		UniProt Fam - pfam/interpro	Valid	NA	PF01784;	IPR002678;IPR036069;IPR006311;	A0A497YZP7	RLK01591.1	Mucilaginibacter sp. YR332	Putative NIF3 family GTP cyclohydrolase 1 type 2	A9A38_3813	Reference (non-duplicate)	NA	Sequence	COG0327;COG3323;
TAT signal		UniProt Fam - pfam/interpro	Valid	NA	PF01784;	IPR002678;IPR036069;IPR006311;	A0A6H2BJN2	QJB39353.1	Chitinophaga sp. 1303	NGG1p interacting factor NIF3	HF324_16390	Reference (non-duplicate)	NA	Sequence	COG0327;COG3323;
TAT signal		UniProt Fam - pfam/interpro	Valid	NA	PF01784;	IPR002678;IPR036069;IPR006311;	A0A4Q7P6U6	RZS95507.1	Cecembia calidifontis	Putative NIF3 family GTP cyclohydrolase 1 type 2	BC751_1040	Reference (non-duplicate)	NA	Sequence	COG0327;COG3323;
TAT signal		UniProt Fam - pfam/interpro	Valid	NA	PF01784;	IPR002678;IPR036069;IPR006311;	A0A5B9E8D2	QEE28453.1	Terriglobus albidus	Uncharacterized protein	FTW19_10850	Reference (non-duplicate)	NA	Sequence	COG0327;COG3323;
TAT signal		UniProt Fam - pfam/interpro	Valid	NA	PF01784;	IPR002678;IPR036069;IPR006311;	A0A5B2VZK2	KAA2243567.1	Chitinophaga sp. BN140078	Uncharacterized protein	F0L74_13835	Reference (non-duplicate)	NA	Sequence	COG0327;COG3323;
TAT signal		UniProt Fam - pfam/interpro	Valid	NA	PF01784;	IPR002678;IPR036069;IPR006311;	A0A4Y8SE96	TFF37349.1	Mucilaginibacter psychrotolerans	Uncharacterized protein	E2R66_13030	Reference (non-duplicate)	NA	Sequence	COG0327;COG3323;
TAT signal		UniProt Fam - pfam/interpro	Valid	NA	PF01784;	IPR002678;IPR036069;IPR006311;	A0A2P8G838	PSL30136.1	Dyadobacter jiangsuensis	Putative NIF3 family GTP cyclohydrolase 1 type 2	CLV60_10478	Reference (non-duplicate)	NA	Sequence	COG0327;COG3323;
TAT signal		UniProt Fam - pfam/interpro	Invalid	NA	PF01784;	IPR002678;IPR036069;IPR006311;	A0A2W6SAD5	PZU08765.1	Sphingomonas sp.	Uncharacterized protein	DI605_12610	Reference (non-duplicate)	NA	Sequence	COG0327;COG3323;
TAT signal		UniProt Fam - pfam/interpro	Valid	NA	PF01784;	IPR002678;IPR036069;IPR006311;	A0A1M7RCR5	SHN43858.1	Chitinophaga sp. CF418	GTP cyclohydrolase 1 type 2, NIF3 family	SAMN05216311_116100	Reference (non-duplicate)	NA	Sequence	COG0327;COG3323;
TAT signal		UniProt Fam - pfam/interpro	Valid	NA	PF01784;	IPR002678;IPR036069;IPR006311;	A0A4R6IEI5	TDO19325.1	Pedobacter duraquae	Putative NIF3 family GTP cyclohydrolase 1 type 2	CLV32_4565	Reference (non-duplicate)	NA	Sequence	COG0327;COG3323;
TAT signal		UniProt Fam - pfam/interpro	Valid	NA	PF01784;	IPR002678;IPR036069;IPR006311;	A0A4Q5QS19	RYY10932.1	Chitinophagaceae bacterium	NGG1p interacting factor NIF3	EOO04_36115	Reference (non-duplicate)	NA	Sequence	COG0327;COG3323;
TAT signal		UniProt Fam - pfam/interpro	Valid	NA	PF01784;	IPR002678;IPR036069;IPR006311;	A0A1M7ZA55	SHO61566.1	Algoriphagus zhangzhouensis	Putative GTP cyclohydrolase 1 type 2, NIF3 family	SAMN04488108_1426	Reference (non-duplicate)	NA	Sequence	COG0327;COG3323;
TAT signal		UniProt Fam - pfam/interpro	Invalid	NA	PF01784;	IPR002678;IPR036069;IPR006311;	A0A3M1UHP2	RMG28516.1	Bacteroidetes bacterium	NGG1p interacting factor NIF3	D6730_05340	Reference (non-duplicate)	NA	Sequence	COG0327;COG3323;
TAT signal		UniProt Fam - pfam/interpro	Invalid	NA	PF01784;	IPR002678;IPR036069;IPR006311;	A0A2W4PRL0	PZN57988.1	Bacteroidetes bacterium	NGG1p interacting factor NIF3	DIU61_01195	Reference (non-duplicate)	NA	Sequence	COG0327;COG3323;
TAT signal		UniProt Fam - pfam/interpro	Invalid	NA	PF01784;	IPR002678;IPR036069;IPR006311;	A0A3N5ZE45	RPJ83820.1	Acidobacteria bacterium	NGG1p interacting factor NIF3	EHM18_13080	Reference (non-duplicate)	NA	Sequence	COG0327;COG3323;
TAT signal		UniProt Fam - pfam/interpro	Invalid	NA	PF01784;	IPR002678;IPR036069;IPR006311;	A0A2W4RWY7	PZN88505.1	Acidobacteria bacterium	Uncharacterized protein	DIU54_01995	Reference (non-duplicate)	NA	Sequence	COG0327;COG3323;
TAT signal		UniProt Fam - pfam/interpro	Valid	NA	PF01784;	IPR002678;IPR036069;IPR006311;IPR019546;	A0A562UHC0	TWJ04461.1	Mucilaginibacter frigoritolerans	Secreted protein	JN11_00170	Reference (non-duplicate)	NA	Sequence	COG0327;COG3323;
TAT signal		UniProt Fam - pfam/interpro	Valid	NA	PF01784;	IPR002678;IPR036069;IPR006311;	A0A318UMI3	PYF77706.1	Mucilaginibacter sp. OV119	Putative NIF3 family GTP cyclohydrolase 1 type 2	C7486_1186	Reference (non-duplicate)	NA	Sequence	COG0327;COG3323;
TAT signal		UniProt Fam - pfam/interpro	Valid	NA	PF01784;	IPR002678;IPR036069;IPR006311;	A0A1G4RVL4	SCW60771.1	Mucilaginibacter sp. NFR10	Putative GTP cyclohydrolase 1 type 2, NIF3 family	SAMN03159284_02228	Reference (non-duplicate)	NA	Sequence	COG0327;COG3323;
TAT signal		UniProt Fam - pfam/interpro	Valid	NA	PF01784;	IPR002678;IPR036069;IPR006311;	A0A2H9VLD1	PJJ79122.1	Mucilaginibacter auburnensis	Putative NIF3 family GTP cyclohydrolase 1 type 2	CLV57_2247	Reference (non-duplicate)	NA	Sequence	COG0327;COG3323;
TAT signal		UniProt Fam - pfam/interpro	Valid	NA	PF01784;	IPR002678;IPR036069;IPR006311;	A0A494VYT5	AYL99469.1	Mucilaginibacter sp. HYN0043	NGG1p interacting factor NIF3	HYN43_016565	Reference (non-duplicate)	NA	Sequence	COG0327;COG3323;
TAT signal		UniProt Fam - pfam/interpro	Valid	NA	PF01784;	IPR002678;IPR036069;IPR006311;	T0ISB1	EQB31720.1	Sphingobium ummariense RL-3	Uncharacterized protein	M529_13145	Reference (non-duplicate)	NA	Sequence	COG0327;COG3323;
TAT signal		UniProt Fam - pfam/interpro	Valid	NA	PF01784;	IPR002678;IPR036069;IPR006311;	A0A2A2S6J3	PAW94282.1	Mucilaginibacter sp. MD40	Uncharacterized protein	CKK33_12605	Reference (non-duplicate)	NA	Sequence	COG0327;COG3323;
TAT signal		UniProt Fam - pfam/interpro	Valid	NA	PF01784;	IPR002678;IPR036069;IPR006311;	A0A143PJ92	AMY07839.1	Luteitalea pratensis	Dinuclear metal center protein, YbgI/ family	LuPra_01020	Reference (non-duplicate)	NA	Sequence	COG0327;COG3323;
TAT signal		UniProt Fam - pfam/interpro	Valid	NA	PF01784;	IPR002678;IPR036069;IPR006311;	A0A2Z5G0V5	AXC12206.1	Acidisarcina polymorpha	Uncharacterized protein	ACPOL_2902	Reference (non-duplicate)	NA	Sequence	COG0327;
TAT signal		UniProt Fam - pfam/interpro	Valid	NA	PF01784;	IPR002678;IPR036069;IPR006311;	A0A5B8W408	QEC78269.1	Mucilaginibacter ginsenosidivorax	NGG1p interacting factor NIF3	FSB76_20845	Reference (non-duplicate)	NA	Sequence	COG0327;COG3323;
TAT signal		UniProt Fam - pfam/interpro	Valid	NA	PF01784;	IPR002678;IPR036069;IPR006311;	A0A1G8KVR2	SDI47453.1	Mucilaginibacter gossypii	Putative GTP cyclohydrolase 1 type 2, NIF3 family	SAMN05192573_12194	Reference (non-duplicate)	NA	Sequence	COG0327;COG3323;
TAT signal		UniProt Fam - pfam/interpro	Valid	NA	PF01784;	IPR002678;IPR036069;IPR006311;	A0A5C1ICL2	QEM15010.1	Mucilaginibacter gossypii	NGG1p interacting factor NIF3	DIU38_002210	Reference (non-duplicate)	NA	Sequence	COG0327;COG3323;
TAT signal		UniProt Fam - pfam/interpro	Valid	NA	PF01784;	IPR002678;IPR036069;IPR006311;	A0A5C6LKA9	TWV95645.1	Chitinophaga pinensis	NGG1p interacting factor NIF3	FEF09_24410	Reference (non-duplicate)	NA	Sequence	COG0327;COG3323;
Ankyrin repeat		UniProt Fam - pfam/interpro	Invalid	NA	PF01784;	IPR002110;IPR020683;IPR002678;IPR036069;	A0A198XF87	OAV31832.1	Moraxella catarrhalis F18	ANK	AO367_0352	Reference (non-duplicate)	NA	Sequence	COG0327;COG3323;
Ankyrin repeat		UniProt Fam - pfam/interpro	Invalid	NA	PF01784;	IPR002110;IPR020683;IPR002678;IPR036069;	A0A198UDQ4	AU94546.1	Moraxella catarrhalis Z7542	ANK	AO384_1903	Reference (non-duplicate)	NA	Sequence	COG0327;COG3323;
Ankyrin repeat		UniProt Fam - pfam/interpro	Invalid	NA	PF01784;	IPR002110;IPR020683;IPR002678;IPR036069;	D5VCB2	ADG61315.1	Moraxella catarrhalis BBH18	NIF3 family protein	MCR_1050	Reference (non-duplicate)	NA	Sequence	COG0327;COG3323;
Ankyrin repeat		UniProt Fam - pfam/interpro	Invalid	NA	PF01784;	IPR002110;IPR020683;IPR002678;IPR036069;	A0A1E9VUZ7	OFN29448.1	Moraxella sp. HMSC061H09	Nif3-like dinuclear metal center hexameric protein	HMPREF2573_06745	Reference (non-duplicate)	NA	Sequence	COG0327;COG3323;
Ankyrin repeat		UniProt Fam - pfam/interpro	Invalid	NA	PF01784;	IPR002110;IPR020683;IPR002678;IPR036069;	A0A198WNN3	RKL90268.1	Moraxella catarrhalis COPD_M112	Nif3-like dinuclear metal center hexameric protein	AO370_1977 D6D77_00265	Reference (non-duplicate)	NA	Sequence	COG0327;COG3323;
Ankyrin repeat		UniProt Fam - pfam/interpro	Invalid	NA	PF01784;	IPR002110;IPR020683;IPR002678;IPR036069;	A0A3A9N4D0	RKM04340.1	Moraxella catarrhalis COPD_M82	Nif3-like dinuclear metal center hexameric protein	D6E05_03060	Reference (non-duplicate)	NA	Sequence	COG0327;COG3323;
Ankyrin repeat		UniProt Fam - pfam/interpro	Invalid	NA	PF01784;	IPR002110;IPR020683;IPR002678;IPR036069;	A0A3S9QCG9	AZQ92462.1	Moraxella catarrhalis 46P58B1	NIF3 family protein	EJK53_1176	Reference (non-duplicate)	NA	Sequence	COG0327;COG3323;
Ankyrin repeat		UniProt Fam - pfam/interpro	Invalid	NA	PF01784;	IPR002110;IPR020683;IPR002678;IPR036069;	A0A198Y1W7	OAV38098.1	Moraxella catarrhalis C031	ANK	AO365_0194	Reference (non-duplicate)	NA	Sequence	COG0327;COG3323;
PI3K accessory		UniProt Fam - pfam/interpro	Invalid	NA	PF01784;	IPR002678;IPR036069;IPR001263;	A0A2W5HVR2	PZP64874.1	Dechlorosoma suillum	Nif3-like dinuclear metal center hexameric protein	DI596_00830	Reference (non-duplicate)	NA	Sequence	COG0327;COG3323;
PI3K accessory		UniProt Fam - pfam/interpro	Invalid	NA	PF01784;	IPR002678;IPR036069;IPR001263;	A0A1R1IE05	OMG56924.1	Azonexus hydrophilus	Nif3-like dinuclear metal center hexameric protein	BJN45_03800	Reference (non-duplicate)	NA	Sequence	COG0327;COG3323;
PI3K accessory		UniProt Fam - pfam/interpro	Invalid	NA	PF01784;	IPR002678;IPR036069;IPR001263;	A0A5C7EPY7	TXF10552.1	Hydrogenophilales bacterium SM250	Nif3-like dinuclear metal center hexameric protein	FR698_14735	Reference (non-duplicate)	NA	Sequence	COG0327;COG3323;
PAS	PAS: Per - period circadian protein; Arnt - Ah receptor nuclear translocator protein; Sim - single-minded protein	UniProt Fam - pfam/interpro	Invalid	NA	PF01784;	IPR002678;IPR036069;IPR000014;	A0A6F8V8U9	BCB25547.1	Sulfurimicrobium lacus	GTP cyclohydrolase 1 type 2	SKTS_04330	Reference (non-duplicate)	NA	Sequence	COG0327;COG3323;
PAS	PAS: Per - period circadian protein; Arnt - Ah receptor nuclear translocator protein; Sim - single-minded protein	UniProt Fam - pfam/interpro	Invalid	NA	PF01784;	IPR002678;IPR036069;IPR000014;	A0A2D7P8R2	MAJ55574.1	Gammaproteobacteria bacterium	Nif3-like dinuclear metal center hexameric protein	CMP92_06380	Reference (non-duplicate)	NA	Sequence	COG0327;COG3323;
PAS	PAS: Per - period circadian protein; Arnt - Ah receptor nuclear translocator protein; Sim - single-minded protein	UniProt Fam - pfam/interpro	Invalid	NA	PF01784;	IPR002678;IPR036069;IPR000014;	A0A2E8L325	MBQ85840.1	Gammaproteobacteria bacterium	Nif3-like dinuclear metal center hexameric protein	CMQ16_05490	Reference (non-duplicate)	NA	Sequence	COG0327;COG3323;
PAS	PAS: Per - period circadian protein; Arnt - Ah receptor nuclear translocator protein; Sim - single-minded protein	UniProt Fam - pfam/interpro	Invalid	NA	PF01784;	IPR002678;IPR036069;IPR000014;	A0A1Z9WB01	OUX74929.1	Gammaproteobacteria bacterium TMED107	Nif3-like dinuclear metal center hexameric protein	CBC67_05960	Reference (non-duplicate)	NA	Sequence	COG0327;COG3323;
Rhodanese	Thiosulfate sulfurtransferase	UniProt Fam - pfam/interpro	Conditional	NA	PF01784;PF00581;	IPR002678;IPR036069;IPR001763;IPR036873;	A0A523S1I0	TET11699.1	Thorarchaeota archaeon (strain OWC)	Rhodanese domain-containing protein	E3J86_02190	Reference (non-duplicate)	NA	Sequence	COG0327;COG0607;COG2897;COG2210;COG4283;COG3323;
Rhodanese	Thiosulfate sulfurtransferase	UniProt Fam - pfam/interpro	Conditional	NA	PF01784;PF00581;	IPR002678;IPR036069;IPR001763;IPR036873;	A0A1Q9NQ61	OLS24250.1	Candidatus Heimdallarchaeota archaeon LC	Thiosulfate sulfurtransferase GlpE (EC 2.8.1.1)	glpE HeimC3_21490	Reference (non-duplicate)	NA	Sequence	COG0327;COG2897;COG0607;COG2210;COG4283;COG3323;
Methyltransferase	SAM-dependent methyltransferase	UniProt Fam - pfam/interpro	Invalid	NA	PF01784;	IPR002678;IPR036069;IPR029063;	A0A1A9YSN1	KK352759.1	Glossina fuscipes fuscipes	Uncharacterized protein	GfusI1:KK352759.1	Reference (non-duplicate)	NA	Sequence	COG0327;COG3323;COG2384;
Methyltransferase	SAM-dependent methyltransferase	UniProt Fam - pfam/interpro	Invalid	NA	PF01784;	IPR002678;IPR036069;IPR029063;	A0A351ZDZ0	HBB19422.1	Ruminococcus sp.	GTP cyclohydrolase 1 type 2 homolog	DCZ62_03165	Reference (non-duplicate)	NA	Sequence	COG0327;COG2384;COG3323;COG2813;
Methyltransferase	SAM-dependent methyltransferase	UniProt Fam - pfam/interpro	Invalid	NA	PF01784;	IPR002678;IPR036069;IPR029063;	A0A1Q6QDG2	OLA28143.1	Faecalibacterium sp. CAG:82-related	GTP cyclohydrolase 1 type 2 homolog (Fragment)	BHW25_00270	Reference (non-duplicate)	NA	Sequence	COG0327;COG3323;COG2384;COG2813;COG4106;
Methyltransferase	SAM-dependent methyltransferase	UniProt Fam - pfam/interpro	Invalid	NA	PF01784;	IPR002678;IPR036069;IPR029063;	A0A1V5GPQ5	OPZ21340.1	Firmicutes bacterium ADurb.BinA205	GTP cyclohydrolase 1 type 2 homolog	BWZ04_01074	Reference (non-duplicate)	NA	Sequence	COG0327;COG2384;COG3323;
Methyltransferase	SAM-dependent methyltransferase	UniProt Fam - pfam/interpro	Valid	NA	PF01784;	IPR002678;IPR036069;IPR029063;	A0A1K1P671	SFW43282.1	Ruminococcus flavefaciens	GTP cyclohydrolase 1 type 2 homolog	SAMN02910280_2533	Reference (non-duplicate)	NA	Sequence	COG2384;COG0327;COG3323;
Methyltransferase	SAM-dependent methyltransferase	UniProt Fam - pfam/interpro	Valid	NA	PF01784;	IPR002678;IPR036069;IPR029063;	A0A1Y4H6A9	OUP03607.1	Anaerofilum sp. An201	GTP cyclohydrolase 1 type 2 homolog	B5F36_09025	Reference (non-duplicate)	NA	Sequence	COG0327;COG3323;COG2384;COG2230;COG2519;COG2813;COG2264;COG4976;COG2890;COG2226;COG2227;COG4106;
Methyltransferase	SAM-dependent methyltransferase	UniProt Fam - pfam/interpro	Valid	NA	PF01784;	IPR002678;IPR036069;IPR029063;	R6TZV8	CDC78963.1	Clostridium sp. CAG:964	GTP cyclohydrolase 1 type 2 homolog	BN818_00528	Reference (non-duplicate)	NA	Sequence	COG0327;COG2384;COG3323;
Methyltransferase	SAM-dependent methyltransferase	UniProt Fam - pfam/interpro	Valid	NA	PF01784;	IPR002678;IPR036069;IPR029063;	A0A1M7J9A7	SHM49508.1	Ruminococcus flavefaciens	GTP cyclohydrolase 1 type 2 homolog	SAMN04487860_105208	Reference (non-duplicate)	NA	Sequence	COG0327;COG2384;COG3323;
Methyltransferase	SAM-dependent methyltransferase	UniProt Fam - pfam/interpro	Valid	NA	PF01784;	IPR002678;IPR036069;IPR029063;	A0A315XZ86	PWJ13054.1	Ruminococcus flavefaciens	GTP cyclohydrolase 1 type 2 homolog	IE37_01553	Reference (non-duplicate)	NA	Sequence	COG0327;COG2384;COG3323;
Methyltransferase	SAM-dependent methyltransferase	UniProt Fam - pfam/interpro	Valid	NA	PF01784;	IPR002678;IPR036069;IPR029063;	A0A1H7K455	SEK81354.1	Ruminococcus flavefaciens	GTP cyclohydrolase 1 type 2 homolog	SAMN02910353_01331	Reference (non-duplicate)	NA	Sequence	COG2384;COG0327;COG3323;
Methyltransferase	SAM-dependent methyltransferase	UniProt Fam - pfam/interpro	Invalid	NA	PF01784;	IPR002678;IPR036069;IPR029063;	A0A3C2BAW6	HAP78958.1	Ruminococcus sp.	GTP cyclohydrolase 1 type 2 homolog	DCQ78_02025	Reference (non-duplicate)	NA	Sequence	COG0327;COG2384;COG3323;
Methyltransferase	SAM-dependent methyltransferase	UniProt Fam - pfam/interpro	Invalid	NA	PF01784;	IPR002678;IPR036069;IPR029063;	A0A349GPI5	HAS78948.1	Ruminococcus sp.	GTP cyclohydrolase 1 type 2 homolog	DCS38_04445 DD392_04235 DIW26_05640	Reference (non-duplicate)	NA	Sequence	COG0327;COG2384;COG3323;
Methyltransferase	SAM-dependent methyltransferase	UniProt Fam - pfam/interpro	Invalid	NA	PF01784;	IPR002678;IPR036069;IPR029063;	R7MPN5	HBN11164.1	Ruminococcus sp. CAG:624	GTP cyclohydrolase 1 type 2 homolog	BN739_01661	Reference (non-duplicate)	NA	Sequence	COG0327;COG2384;COG3323;
Methyltransferase	SAM-dependent methyltransferase	UniProt Fam - pfam/interpro	Invalid	NA	PF01784;	IPR002678;IPR036069;IPR029063;	A0A352DME4	HBB71376.1	Ruminococcus sp.	GTP cyclohydrolase 1 type 2 homolog	DCZ71_02070	Reference (non-duplicate)	NA	Sequence	COG0327;COG2384;COG3323;COG2813;COG2890;
Methyltransferase	SAM-dependent methyltransferase	UniProt Fam - pfam/interpro	Valid	NA	PF01784;	IPR002678;IPR036069;IPR029063;	A0A1H6HY50	SEH40925.1	Ruminococcus flavefaciens	GTP cyclohydrolase 1 type 2 homolog	SAMN02910265_00464	Reference (non-duplicate)	NA	Sequence	COG0327;COG2384;COG3323;
Methyltransferase	SAM-dependent methyltransferase	UniProt Fam - pfam/interpro	Valid	NA	PF01784;	IPR002678;IPR036069;IPR029063;	A0A1K1TH26	SFW99846.1	Ruminococcus flavefaciens	GTP cyclohydrolase 1 type 2 homolog	SAMN04487832_101158	Reference (non-duplicate)	NA	Sequence	COG0327;COG2384;COG3323;
Methyltransferase	SAM-dependent methyltransferase	UniProt Fam - pfam/interpro	Valid	NA	PF01784;	IPR002678;IPR036069;IPR029063;	A0A1C6D8P3	SCJ04932.1	uncultured Ruminococcus sp.	GTP cyclohydrolase 1 type 2 homolog	SAMEA3545397_01939	Reference (non-duplicate)	NA	Sequence	COG0327;COG2384;COG3323;
Methyltransferase	SAM-dependent methyltransferase	UniProt Fam - pfam/interpro	Valid	NA	PF01784;	IPR002678;IPR036069;IPR029063;	W7V3L4	EWM55247.1	Ruminococcus flavefaciens 007c	GTP cyclohydrolase 1 type 2 homolog	RF007C_04640	Reference (non-duplicate)	NA	Sequence	COG0327;COG2384;COG3323;
Methyltransferase	SAM-dependent methyltransferase	UniProt Fam - pfam/interpro	Invalid	NA	PF01784;	IPR002678;IPR036069;IPR029063;	A0A1S9CP12	OON98510.1	Epulopiscium sp. Nele67-Bin004	GTP cyclohydrolase 1 type 2 homolog	ATN35_04800	Reference (non-duplicate)	NA	Sequence	COG0327;COG2384;COG3323;
Methyltransferase	SAM-dependent methyltransferase	UniProt Fam - pfam/interpro	Valid	NA	PF01784;	IPR002678;IPR036069;IPR029063;	R6TVZ8	CDC62787.1	Clostridium sp. CAG:448	GTP cyclohydrolase 1 type 2 homolog	BN660_01681	Reference (non-duplicate)	NA	Sequence	COG0327;COG2384;COG3323;
Zinc finger	RING-type	UniProt Fam - pfam/interpro	Valid	NA	PF01784;PF02591;	IPR002678;IPR036069;IPR003743;	A0A4D4KYB2	GDY53164.1	Streptomyces violaceusniger	zf-RING	SVIO_037870	Reference (non-duplicate)	NA	Sequence	COG0327;COG3323;COG1579;
Zinc finger	RING-type	UniProt Fam - pfam/interpro	Valid	NA	PF01784;PF02591;	IPR002678;IPR036069;IPR003743;	Q7MQP7	CAE11115.1	Wolinella succinogenes	zf-RING	WS2117	Reference (non-duplicate)	NA	Sequence	COG0327;COG3323;
ATPase	nucleotide-binding active site	UniProt Fam - pfam/interpro	Invalid	NA	PF01784;	IPR020003;IPR002678;IPR036069;	A0A350THV7	HAX29875.1	Oscillibacter sp.	GTP cyclohydrolase 1 type 2 homolog	DCX96_01165	Reference (non-duplicate)	NA	Sequence	COG0327;COG3323;
ATPase	nucleotide-binding active site	UniProt Fam - pfam/interpro	Invalid	NA	PF01784;	IPR020003;IPR002678;IPR036069;	R6D9Z7	CDA80976.1	Firmicutes bacterium CAG:176	GTP cyclohydrolase 1 type 2 homolog	BN516_01006	Reference (non-duplicate)	NA	Sequence	COG0327;COG3323;
ATPase	nucleotide-binding active site	UniProt Fam - pfam/interpro	Invalid	NA	PF01784;	IPR020003;IPR002678;IPR036069;	A0A3D2IC88	HCI69038.1	Oscillibacter sp.	GTP cyclohydrolase 1 type 2 homolog	DER17_08420	Reference (non-duplicate)	NA	Sequence	COG0327;COG3323;
ATPase	nucleotide-binding active site	UniProt Fam - pfam/interpro	Invalid	NA	PF01784;	IPR020003;IPR002678;IPR036069;	A0A3D2YGY6	HCL21486.1	Oscillibacter sp.	GTP cyclohydrolase 1 type 2 homolog	DHW47_06115	Reference (non-duplicate)	NA	Sequence	COG0327;COG3323;
COG6	Conserved oligomeric Golgi complex subunit 6 (COG6)	UniProt Fam - pfam/interpro	Inconclusive	NA	PF06419;PF01784;	IPR010490;IPR002678;IPR036069;	A0A3M7MGS3	RMZ73667.1	Pyrenophora seminiperda CCB06	Conserved oligomeric Golgi complex subunit 6 (COG complex subunit 6) (Component of oligomeric Golgi complex 6)	GMOD_00009415	Reference (non-duplicate)	NA	Sequence	COG0327;COG3323;
COG6	Conserved oligomeric Golgi complex subunit 6 (COG6)	UniProt Fam - pfam/interpro	Inconclusive	NA	PF06419;PF01784;	IPR010490;IPR002678;IPR036069;	A0A364N878	RAR13528.1	Stemphylium lycopersici	Conserved oligomeric Golgi complex subunit 6 (COG complex subunit 6) (Component of oligomeric Golgi complex 6)	DDE83_003127	Reference (non-duplicate)	NA	Sequence	COG0327;COG3323;
RNase H		UniProt Fam - pfam/interpro	Inconclusive; subsequently validated	NA	PF01784;	IPR002678;IPR036069;IPR000014;	A0A6F8V8U9	BCB25547.1	Sulfurimicrobium lacus	GTP cyclohydrolase 1 type 2	SKTS_04330	duplicate	UniProt Fam - pfam/interpro;	NA	NA
RNase H		UniProt Fam - pfam/interpro	Inconclusive; subsequently validated	NA	PF01784;	IPR002678;IPR036069;IPR000014;	A0A2D7P8R2	MAJ55574.1	Gammaproteobacteria bacterium	Nif3-like dinuclear metal center hexameric protein	CMP92_06380	duplicate	UniProt Fam - pfam/interpro;	NA	NA
RNase H		UniProt Fam - pfam/interpro	Inconclusive; subsequently validated	NA	PF01784;	IPR002678;IPR036069;IPR000014;	A0A2E8L325	MBQ85840.1	Gammaproteobacteria bacterium	Nif3-like dinuclear metal center hexameric protein	CMQ16_05490	duplicate	UniProt Fam - pfam/interpro;	NA	NA
RNase H		UniProt Fam - pfam/interpro	Inconclusive; subsequently validated	NA	PF01784;	IPR002678;IPR036069;IPR000014;	A0A1Z9WB01	OUX74929.1	Gammaproteobacteria bacterium TMED107	Nif3-like dinuclear metal center hexameric protein	CBC67_05960	duplicate	UniProt Fam - pfam/interpro;	NA	NA
Longin	VAMP, SNARE	UniProt Fam - pfam/interpro	Invalid	NA	PF01784;	IPR002678;IPR036069;IPR010908;	A0A6T8NLH3	CAB9070713.1	Hemiselmis andersenii	Uncharacterized protein (Fragment)	HAND1043_LOCUS18187	Reference (non-duplicate)	NA	Sequence	COG0327;COG3323;
Longin	VAMP, SNARE	UniProt Fam - pfam/interpro	Invalid	NA	PF01784;	IPR002678;IPR036069;IPR010908;	A0A6U4TWP9	CAC1025336.1	Hemiselmis andersenii	Uncharacterized protein (Fragment)	HAND00432_7323	Reference (non-duplicate)	NA	Sequence	COG0327;COG3323;
Longin	VAMP, SNARE	UniProt Fam - pfam/interpro	Invalid	NA	PF01784;	IPR002678;IPR036069;IPR010908;	A0A6U2BEX3	CAC0198482.1	Hemiselmis andersenii	Uncharacterized protein (Fragment)	HAND1041_4246	Reference (non-duplicate)	NA	Sequence	COG0327;COG3323;
Longin	VAMP, SNARE	UniProt Fam - pfam/interpro	Invalid	NA	PF01784;	IPR002678;IPR036069;IPR010908;	A0A6U4M6M1	CAC0941521.1	Hemiselmis andersenii	Uncharacterized protein (Fragment)	HAND1042_12554	Reference (non-duplicate)	NA	Sequence	COG0327;COG3323;
Nitrogen regulatory protein PII	N-reg	UniProt Fam - pfam/interpro	Valid	NA	PF01784;	IPR002678;IPR036069;IPR017221;IPR002187;IPR015867;	A0A1I1ZD98	SFE29298.1	Alteribacillus iranensis	GTP cyclohydrolase 1 type 2 homolog	SAMN05192532_101159	Reference (non-duplicate)	NA	Sequence	COG3323;COG0327;
Nitrogen regulatory protein PII	N-reg	UniProt Fam - pfam/interpro	Valid	NA	PF01784;	IPR002678;IPR036069;IPR017221;IPR002187;IPR015867;	A0A1G8CT52	SDH48443.1	Alteribacillus persepolensis	GTP cyclohydrolase 1 type 2 homolog	SAMN05192534_10665	Reference (non-duplicate)	NA	Sequence	COG3323;COG0327;
Transferase	ATP phosphoribosyltransferase HisG; Histidinol dehydrogenase; Sulphate adenylyltransferase; Adenylyl-sulfate kinase	UniProt Fam - pfam/interpro	Invalid	NA	PF05635;PF00155;PF00009;PF01634;PF00815;PF01784;PF01507;	IPR012657;IPR036583;IPR016161;IPR001917;IPR004839;IPR002891;IPR013820;IPR018198;IPR024893;IPR041757;IPR044138;IPR044139;IPR031157;IPR002678;IPR036069;IPR005861;IPR001692;IPR012131;IPR027417;IPR002500;IPR015424;IPR015422;IPR015421;IPR014729;IPR005225;IPR011779;IPR011784;IPR000795;IPR009000;IPR009001;	A0A699HSW0	GEY60218.1	Tanacetum cinerariifolium	APS kinase (EC 1.1.1.23) (EC 2.3.1.50) (EC 2.7.1.25) (EC 2.7.7.4) (ATP adenosine-5'-phosphosulfate 3'-phosphotransferase) (ATP-sulfurylase large subunit) (ATP-sulfurylase small subunit) (Adenylyl-sulfate kinase) (Sulfate adenylate transferase) (Sulfate adenylyltransferase subunit 1) (Sulfate adenylyltransferase subunit 2)	Tci_432192	Reference (non-duplicate)	NA	Sequence	COG2895;COG0141;COG0529;COG3205;COG0079;COG0040;COG0327;COG0175;COG3276;COG0436;COG3323;COG0481;COG0480;COG1217;COG0050;COG0645;COG1160;COG3688;COG0532;COG4108;COG0699;COG1168;COG3977;COG1159;COG3749;COG3896;COG0125;COG1448;COG0572;COG3969;
Oxidoreductase	NADH-ubiquinone oxidoreductase; Acetyl-CoA carboxylase, biotin carboxylase	UniProt Fam - pfam/interpro	Invalid	NA	PF02785;PF00289;PF02786;PF01784;PF00507;PF01058;	IPR004549;IPR011761;IPR013815;IPR005481;IPR011764;IPR005482;IPR005479;IPR002678;IPR036069;IPR000440;IPR006137;IPR006138;IPR038430;IPR016185;IPR011054;	A0A6A5L104	KAF1855237.1	Lupinus albus	Acetyl-CoA carboxylase subunit A (NADH dehydrogenase subunit 3) (NADH-ubiquinone oxidoreductase chain 3)	Lal_00008608	Reference (non-duplicate)	NA	Sequence	COG4770;COG1038;COG0439;COG0377;COG0838;COG0777;COG0327;COG3260;COG2232;COG0458;COG0026;COG1181;COG3919;COG0151;COG1984;COG0027;COG0511;COG1821;COG0505;COG3323;COG0041;
Response regulator	Transcription factor, T-box	UniProt Fam - pfam/interpro	Inconclusive	NA	PF13499;PF01784;PF01619;PF00907;	IPR011992;IPR018247;IPR002048;IPR029041;IPR002678;IPR036069;IPR008967;IPR002872;IPR036960;IPR001699;IPR018186;	A0A6A4S227	KAF0025382.1	Scophthalmus maximus	Uncharacterized protein	F2P81_022263	Reference (non-duplicate)	NA	Sequence	COG0327;COG3323;COG5054;COG0506;COG5126;
Methyltransferase	tRNA methyltransferase TrmK	UniProt Fam - pfam/interpro	Valid, conditional	NA	PF01784;PF04816;	IPR002678;IPR036069;IPR029063;IPR006901;	A0A1H8ZHI3	SEP63989.1	Ignavigranum ruoffiae	GTP cyclohydrolase 1 type 2 homolog	SAMN04488558_101250	Reference (non-duplicate)	NA	Sequence	COG2384;COG0327;COG3323;
EF-hand pair	EF-hand pair	UniProt Fam - pfam/interpro	Valid, conditional	NA	PF13499;PF13833;PF01784;	IPR011992;IPR018247;IPR002048;IPR002678;IPR036069;	A0A498N151	RXN22507.1	Labeo rohita	NIF3 1	ROHU_006714	Reference (non-duplicate)	NA	Sequence	COG0327;COG3323;COG5054;COG5126;
Uncategorized/Singleton		UniProt Fam - pfam/interpro	singletons/inconclusive	NA	PF01784;PF00400;	IPR002678;IPR036069;IPR015943;IPR001680;IPR019775;IPR017986;IPR036322;	A0A067R4D1		Zootermopsis nevadensis	NIF3-like protein 1	L798_07717	duplicate	UniProt Fam - pfam/interpro; InterPro exported;Pfam exported;	NA	NA
Uncategorized/Singleton		UniProt Fam - pfam/interpro	singletons/inconclusive	NA	PF01784;PF00400;	IPR028608;IPR020472;IPR002678;IPR036069;IPR007110;IPR015943;IPR001680;IPR019775;IPR017986;IPR036322;	A0A6G0TSX2		Aphis glycines	Probable cytosolic iron-sulfur protein assembly protein Ciao1	Ciao1 AGLY_006117	duplicate	UniProt Fam - pfam/interpro;InterPro exported;	NA	NA
Phosphohexomutase	Alpha-D-phosphohexomutase, alpha/beta/alpha I/II/III	UniProt Fam - pfam/interpro	Invalid	NA	PF01784;PF02878;	IPR005844;IPR016055;IPR002678;IPR036069;	A0A1A9X722	GFUI000799	Glossina fuscipes fuscipes	PGM	GfusI1:JFJR01012816.1	Reference (non-duplicate)	NA	Sequence	COG0033;COG3357;COG1109;COG0327;COG3323;
Uncharacterized	Nur1/Mug154	UniProt Fam - pfam/interpro	Inconclusive	NA	PF10332;PF01784;	IPR002678;IPR036069;IPR018819;	A0A1R0H439	OLY83907.1	Smittium mucronatum	Protein NIF3-like protein	AYI68_g1946	Reference (non-duplicate)	NA	Sequence	COG0327;COG3323;
Phosphatase	Histidine phosphatase superfamily, clade-1	UniProt Fam - pfam/interpro	Inconclusive	NA	PF00300;PF01784;	IPR002678;IPR036069;IPR013078;IPR029033;IPR015867;	A0A0U1DR76	CQD21231.1	Mycolicibacterium conceptionense	Dinuclear metal center protein, YbgI/ family	BN970_04936	Reference (non-duplicate)	NA	Sequence	COG3323;COG0327;COG0328;COG0406;COG2062;COG0588;
Response regulator	Transcription factor Skn7	UniProt Fam - pfam/interpro	Inconclusive	NA	PF00447;PF01784;PF00072;	IPR011006;IPR002678;IPR036069;IPR000232;IPR027725;IPR001789;IPR027718;IPR036388;IPR036390;	A0A3M7N688	RMZ82353.1	Chaetothyriales sp. CBS 135597	Response regulatory domain-containing protein (Fragment)	DV738_g1916	Reference (non-duplicate)	NA	Sequence	COG0327;COG0784;COG3323;COG0642;COG2198;COG5002;COG4191;COG3706;COG4875;COG0643;COG2461;COG4753;COG2202;COG4999;COG4565;COG4566;COG3707;COG4720;COG2964;
Zinc finger	RING/FYVE/PHD-type	UniProt Fam - pfam/interpro	Valid, conditional	NA	PF01784;PF13445;	IPR002678;IPR036069;IPR027370;IPR001841;IPR013083;IPR017907;	A0A6A5SX80	KAF1945091.1	Clathrospora elynae	RING-type domain-containing protein	EJ02DRAFT_509786	Reference (non-duplicate)	NA	Sequence	COG0327;
Zinc finger	RING/FYVE/PHD-type	UniProt Fam - pfam/interpro	Valid, conditional	NA	PF01784;PF13445;	IPR016197;IPR002678;IPR036069;IPR027370;IPR001841;IPR013083;IPR017907;	A0A6A5UCW4	KAF1958967.1	Byssothecium circinans	RING-type domain-containing protein	CC80DRAFT_533913	Reference (non-duplicate)	NA	Sequence	COG0327;
Tyrosine phosphatase	Protein-tyrosine phosphatase-like; Dual specificity protein phosphatase domain; Kelch-type beta propeller; BTB/POZ domain	UniProt Fam - pfam/interpro	Valid, conditional	NA	PF00782;PF01784;	IPR000210;IPR000340;IPR002678;IPR036069;IPR015915;IPR029021;IPR011333;IPR016130;IPR003595;IPR000387;IPR020422;	A0A421JMT5	RLV92228.1	Spathaspora sp. JA1	NGG1-interacting factor 3	JA1_003263	Reference (non-duplicate)	NA	Sequence	COG0327;COG3323;
Tyrosine phosphatase	Protein-tyrosine phosphatase-like; Dual specificity protein phosphatase domain	UniProt Fam - pfam/interpro	Valid, conditional	NA	PF00782;PF01784;	IPR000340;IPR002678;IPR036069;IPR029021;IPR020422;	A0A642US31	KAA8904096.1	Diutina rugosa	Tyrosine-protein phosphatase domain-containing protein	DIURU_002048	Reference (non-duplicate)	NA	Sequence	COG0327;COG3323;
Tyrosine phosphatase	Protein-tyrosine phosphatase-like; Dual specificity protein phosphatase domain	UniProt Fam - pfam/interpro	Valid, conditional	NA	PF00782;PF01784;	IPR000340;IPR002678;IPR036069;IPR029021;IPR016130;IPR000387;IPR020422;	A0A367XR54	RCK56095.1	Candida viswanathii	NGG1-interacting factor 3	NIF3 Cantr_05866	Reference (non-duplicate)	NA	Sequence	COG0327;COG3323;
Dehydrogenase	Short-chain dehydrogenase/reductase SDR	UniProt Fam - pfam/interpro	Inconclusive	NA	PF00106;PF01784;	IPR002678;IPR036069;IPR036291;IPR002347;	V5FCQ5	GAD94824.1	Byssochlamys spectabilis (strain No. 5 / NBRC 109023)	NGG1 interacting factor Nif3, putative	PVAR5_3453	Reference (non-duplicate)	NA	Sequence	COG0327;COG3323;
Peptidase	Metalloenzyme, LuxS/M16 peptidase-like	UniProt Fam - pfam/interpro	Invalid	NA	PF01784;PF05193;	IPR002678;IPR036069;IPR011249;IPR015867;IPR007863;	A0A519L9B3	RZJ45919.1	Chryseobacterium sp.	Nif3-like dinuclear metal center hexameric protein (Fragment)	EOO19_10785	Reference (non-duplicate)	NA	Sequence	COG3323;COG0327;COG0612;
Cyclophilin-like	Cyclophilin-like domain superfamily; Cyclophilin TM1367-like domain	UniProt Fam - pfam/interpro	Invalid	NA	PF04126;PF01784;	IPR029000;IPR025658;IPR002678;IPR036069;IPR015867;	X1JV56	GAH98626.1	marine sediment metagenome	Cyclophil	S06H3_04639	Reference (non-duplicate)	NA	Sequence	COG3323;COG0327;COG2164;COG4925;
Transporter/membrane component	Solute-binding protein family 5	UniProt Fam - pfam/interpro	Invalid	NA	PF01784;PF00496;	IPR002678;IPR036069;IPR039424;IPR000914;	A0A0F8YPV6	KKK83443.1	marine sediment metagenome	SBP	LCGC14_2793320	Reference (non-duplicate)	NA	Sequence	COG4166;COG4533;COG0747;COG0327;COG3323;
Methyltransferase	mRNA (guanine-N(7))-methyltransferase domain	UniProt Fam - pfam/interpro	Invalid	NA	PF01784;PF03291;	IPR002678;IPR036069;IPR004971;IPR015867;	X1K8X0	GAH90075.1	marine sediment metagenome	mRNA cap 0 methyltransferase domain-containing protein (Fragment)	S06H3_05697	Reference (non-duplicate)	NA	Sequence	COG3323;COG0327;
Cyclophilin-like	KipI family; Carboxyltransferase domain, subdomain A and B; LamB/YcsF/PxpA-like	UniProt Fam - pfam/interpro	Valid, conditional	NA	PF02626;PF02682;PF03746;PF01784;	IPR003778;IPR003833;IPR029000;IPR011330;IPR002678;IPR036069;IPR010016;IPR005501;	A0A077ZC64	CDW57982.1	Trichuris trichiura	LamB YcsF and AHS2 and AHS1 and NIF3 domain conta ining protein	TTRE_0000628301	Reference (non-duplicate)	NA	Sequence	COG1540;COG2049;COG1984;COG0327;COG3323;
Peptidase	Peptidase M20B, tripeptide aminopeptidase	UniProt Fam - pfam/interpro	Invalid	NA	PF07687;PF01784;	IPR001261;IPR036264;IPR002678;IPR036069;IPR011650;IPR010161;	A0A6P4JX33	XP_017087386.1	Drosophila bipectinata	peptidase T-like	LOC108118951	Reference (non-duplicate)	NA	Sequence	COG2195;COG0327;COG3323;COG0624;
FAD-/NAD-binding	UCP036654; Transcription factor domain, fungi	UniProt Fam - pfam/interpro	Valid, conditional	NA	PF00890;PF04082;PF01784;	IPR003953;IPR036188;IPR002678;IPR036069;IPR027477;IPR007219;IPR014614;	A0A1S9D5J2	OOO04373.1	Aspergillus oryzae	Fumarate reductase/succinate dehydrogenase flavoprotein domain protein	OAory_01052200	Reference (non-duplicate)	NA	Sequence	COG3573;COG0327;COG3323;COG1053;COG3976;
DNA-binding	Histone H2A	UniProt Fam - pfam/interpro	Inconclusive	NA	PF00125;PF16211;PF01784;	IPR002678;IPR036069;IPR009072;IPR002119;IPR007125;IPR032454;IPR032458;	A0A177B8B7	OAF70380.1	Intoshia linei	Histone H2A (Fragment)	A3Q56_01891	Reference (non-duplicate)	NA	Sequence	COG3323;COG0327;
Response regulator	BolA protein	UniProt Fam - pfam/interpro	Valid, conditional	NA	PF01722;PF01784;	IPR002634;IPR036065;IPR002678;IPR036069;	A0A6M7YMR5	QKD49708.1	Fusarium oxysporum Fo47	Uncharacterized protein	FOBC_03738	Reference (non-duplicate)	NA	Sequence	COG0327;COG3323;COG5007;COG0271;
Hydrolase	Fumarylacetoacetase-like, C-terminal domain superfamily	UniProt Fam - pfam/interpro	Inconclusive	NA	PF01557;PF01784;	IPR011234;IPR036663;IPR002678;IPR036069;	A0A6L5C9Q7	KAF4516464.1	Ephemera danica	FAA	B566_EDAN003211	Reference (non-duplicate)	NA	Sequence	COG0179;COG0327;COG3323;
rRNA	23S rRNA-intervening sequence protein	UniProt Fam - pfam/interpro	Invalid	NA	PF05635;PF01784;	IPR012657;IPR036583;IPR002678;IPR036069;IPR015867;	A0A521GHL1	TAE32306.1	Cytophagales bacterium	Nif3-like dinuclear metal center hexameric protein	EAZ91_05430	Reference (non-duplicate)	NA	Sequence	COG3323;COG0327;
Viral protein	Flavivirus non-structural protein NS4B	UniProt Fam - pfam/interpro	Invalid	NA	PF01349;PF01784;	IPR001528;IPR002678;IPR036069;	A0A2N2VWA3	PKO96212.1	Bacteroidetes bacterium HGW-Bacteroidetes-7	Nif3-like dinuclear metal center hexameric protein	CVU12_06560	Reference (non-duplicate)	NA	Sequence	COG0327;COG3323;
Isomerase	Sugar isomerase (SIS)	UniProt Fam - pfam/interpro	Invalid	NA	PF01784;PF13580;	IPR002678;IPR036069;IPR001347;	A0A7C4PHT4	HGS10824.1	Armatimonadetes bacterium	SIS domain-containing protein	ENT29_05425	Reference (non-duplicate)	NA	Sequence	COG4821;COG3323;COG0327;
Uncharacterized	Spore germination GerAC	UniProt Fam - pfam/interpro	Invalid	NA	PF01784;PF05504;	IPR002678;IPR036069;IPR008844;	A0A356U768	HBQ24884.1	Syntrophomonas sp.	GTP cyclohydrolase 1 type 2 homolog	DD791_00690	Reference (non-duplicate)	NA	Sequence	COG0327;COG3323;
Transferase	Pyridoxal phosphate-dependent transferase, major domain; Aminotransferase, class I/classII	UniProt Fam - pfam/interpro	Conditional, singleton	NA	PF00155;PF01784;	IPR004839;IPR002678;IPR036069;IPR015867;IPR004838;IPR015424;IPR015422;IPR015421;	R4MJN9	AGL27697.1	Mycobacterium tuberculosis CAS/NITR204	Aminotransferase (EC 2.6.1.-)	J113_15520	Reference (non-duplicate)	NA	Sequence	COG3323;COG0079;COG0327;COG0436;COG1167;COG0141;COG1168;
Uncharacterized	Bacillithiol biosynthesis BshC	UniProt Fam - pfam/interpro	Invalid	NA	PF10079;PF01784;	IPR011199;IPR002678;IPR036069;	A0A4Q5Z3B0	RYZ30174.1	Chitinophagaceae bacterium	Bacillithiol biosynthesis BshC	bshC EOO10_03800	Reference (non-duplicate)	NA	Sequence	COG4365;COG0327;COG3323;
NUDIX hydrolase	NUDIX hydrolase domain	UniProt Fam - pfam/interpro	Valid, conditional	NA	PF01784;PF00293;	IPR002678;IPR036069;IPR020476;IPR015797;IPR020084;IPR000086;	A0A087E9N5	KFJ04486.1	Bifidobacterium subtile	PadR family transcriptional regulator (EC 3.6.1.13)	BISU_0493	Reference (non-duplicate)	NA	Sequence	COG0327;COG3323;COG0494;COG2816;COG1443;
Synthase	Citrate synthase	UniProt Fam - pfam/interpro	Invalid	NA	PF00285;PF01784;	IPR002020;IPR036969;IPR002678;IPR036069;IPR015867;	A0A2A4LVD4	PCH51979.1	Flavobacteriaceae bacterium	Nif3-like dinuclear metal center hexameric protein	COC22_04850	Reference (non-duplicate)	NA	Sequence	COG3323;COG0327;COG0372;
Transporter/membrane component	Mitochondrial import inner membrane translocase subunit Tim54	UniProt Fam - pfam/interpro	Inconclusive	NA	PF01784;PF11711;	IPR002678;IPR036069;IPR021056;	Q5B6Z5	EAA59893.1	Emericella nidulans (strain FGSC A4 / ATCC 38163 / CBS 112.46 / NRRL 194 / M139)	Mitochondrial import inner membrane translocase subunit TIM54	AN3685.2	Reference (non-duplicate)	NA	Sequence	COG0327;COG3323;
Cyclophilin-like	KipI family; Carboxyltransferase domain, subdomain A and B	UniProt Fam - pfam/interpro	Valid, conditional	NA	PF02626;PF02682;PF01784;	IPR003778;IPR003833;IPR029000;IPR002678;IPR036069;IPR010016;	A0A0A2VUI6	KGQ11273.1	Beauveria bassiana D1-5	Uncharacterized protein ybgK	BBAD15_g2974	Reference (non-duplicate)	NA	Sequence	COG2049;COG1984;COG0327;COG1540;COG3323;
Response regulator	Chromatin modification-related protein Eaf7/MRGBP	UniProt Fam - pfam/interpro	Inconclusive	NA	PF07904;PF01784;	IPR012423;IPR002678;IPR036069;	A0A0F7SRZ4	CED83424.1	Phaffia rhodozyma	Ngg1-interacting factor 3 protein NIF3L1	CED83424.1	Reference (non-duplicate)	NA	Sequence	COG0327;COG3323;
Uncharacterized	Heterokaryon incompatibility (WD40 repeat subtype)	UniProt Fam - pfam/interpro	Inconclusive	NA	PF06985;PF01784;	IPR002678;IPR036069;IPR010730;	A0A1V8V835	OQO31763.1	Rachicladosporium sp. CCFEE 5018	HET domain-containing protein	B0A51_00665	Reference (non-duplicate)	NA	Sequence	COG0327;COG3323;
Kinesin-like	TPX2, C-terminal	UniProt Fam - pfam/interpro	Inconclusive	NA	PF01784;PF06886;	IPR002678;IPR036069;IPR027329;	A0A0W0F5B4	KTB31428.1	Moniliophthora roreri	TPX2 domain-containing protein	WG66_15991	Reference (non-duplicate)	NA	Sequence	COG0327;COG3323;
Heme-containing mono-oxygenase	Cytochrome P450	UniProt Fam - pfam/interpro	Conditional, singleton	NA	PF01784;PF00067;	IPR001128;IPR036396;IPR002678;IPR036069;	A0A4Y9ZJE9	TFY73981.1	Hericium alpestre	Uncharacterized protein	EWM64_g10031	Reference (non-duplicate)	NA	Sequence	COG3323;COG0327;
EF-hand pair	EF-hand pair	UniProt Fam - pfam/interpro	Valid, conditional	NA	PF13499;PF01784;	IPR011992;IPR018247;IPR002048;IPR002678;IPR036069;	A0A4U5VMZ5	TKS89874.1	Collichthys lucidus	NIF3-like protein 1	D9C73_024003	Reference (non-duplicate)	NA	Sequence	COG0327;COG3323;COG5054;COG5126;
Transporter/membrane component	Type II secretion system protein GspE-like, N-terminal superfamily	UniProt Fam - pfam/interpro	Invalid	NA	PF01784;	IPR002678;IPR036069;IPR015867;IPR037257;	A0A645CGF9	MPM76024.1	bioreactor metagenome	Uncharacterized protein	SDC9_123019	Reference (non-duplicate)	NA	Sequence	COG3323;COG0327;COG1406;
CIAO1/Cia1	WD40 repeat	UniProt Fam - pfam/interpro	Valid, conditional	NA	PF01784;	IPR002678;IPR036069;IPR015943;IPR001680;IPR017986;IPR036322;	A0A423U835	ROT84821.1	Penaeus vannamei	Putative GTP cyclohydrolase 1 type 2 NIF3L1	C7M84_021984	Reference (non-duplicate)	NA	Sequence	COG0327;COG3323;COG2319;
Recombination	TOPRIM domain	UniProt Fam - pfam/interpro	Invalid	NA	PF01784;	IPR002678;IPR036069;IPR017221;IPR015867;IPR006171;	A0A357BCY7	HBR12079.1	Chryseobacterium sp.	GTP cyclohydrolase 1 type 2 homolog	DD740_07705	Reference (non-duplicate)	NA	Sequence	COG3323;COG0327;
Peptidase	Aspartic peptidase, active site	UniProt Fam - pfam/interpro	Invalid	NA	PF01784;	IPR001969;IPR002678;IPR036069;	A0A2N8HDU3	PNC18138.1	Akkermansia muciniphila	Nif3-like dinuclear metal center hexameric protein	CXU22_05740	Reference (non-duplicate)	NA	Sequence	COG0327;COG3323;
Response regulator	Signal transduction response regulator, receiver domain	UniProt Fam - pfam/interpro	Invalid	NA	PF01784;	IPR002678;IPR036069;IPR017221;IPR015867;IPR001789;	A0A246AEY2	OWK71507.1	Pedobacter sp. AJM	GTP cyclohydrolase 1 type 2 homolog	CBW18_10690	Reference (non-duplicate)	NA	Sequence	COG3323;COG0327;
Phosphotransferase	Protein kinase C-like, phorbol ester/diacylglycerol-binding domain; Zinc finger phorbol-ester/DAG-type profile	UniProt Fam - pfam/interpro	Inconclusive	NA	PF01784;	IPR002678;IPR036069;IPR002219;	A0A433QFX1	RUS28728.1	Jimgerdemannia flammicorona	Phorbol-ester/DAG-type domain-containing protein (Fragment)	BC938DRAFT_481525	Reference (non-duplicate)	NA	Sequence	COG0327;COG3323;
Nuclease	AP endonuclease 1, binding site	UniProt Fam - pfam/interpro	Invalid	NA	PF01784;	IPR020847;IPR002678;IPR036069;IPR017221;IPR015867;	A0A1Z5HN40	GAW90933.1	Calderihabitans maritimus	GTP cyclohydrolase 1 type 2 homolog	KKC1_00950	Reference (non-duplicate)	NA	Sequence	COG3323;COG0327;
Intein (intron protein)	Intein N-terminal splicing region	UniProt Fam - pfam/interpro	Invalid	NA	PF01784;	IPR002678;IPR036069;IPR006141;	V2TZ48	ESK41120.1	Acinetobacter nectaris CIP 110549	YbgI/family dinuclear metal center protein	P256_00108	Reference (non-duplicate)	NA	Sequence	COG0327;COG3323;
Phosphorylase	Circadian clock protein KaiA, C-terminal	UniProt Fam - pfam/interpro	Invalid	NA	PF01784;	IPR020856;IPR002678;IPR036069;	A0A7C6L9B2	HHV93905.1	Firmicutes bacterium	GTP cyclohydrolase 1 type 2 homolog	GXX47_05130	Reference (non-duplicate)	NA	Sequence	COG0327;COG3323;
RNA-binding	RNA-binding S4 domain; S4/Hsp/ tRNA synthetase RNA-binding domain	UniProt Fam - pfam/interpro	Inconclusive	NA	PF01784;	IPR002678;IPR036069;IPR002942;	I7K702	CCJ33314.1	Caloramator australicus RC3	GTP cyclohydrolase 1 type 2 homolog	CAAU_1230	Reference (non-duplicate)	NA	Sequence	COG0327;COG3323;COG1187;
Peptidase	AmhX-like	UniProt Fam - pfam/interpro	Invalid	NA	PF01784;	IPR037484;IPR002678;IPR036069;	A0A1W9U5N6	OQY16496.1	Desulfobacteraceae bacterium 4572	Uncharacterized protein (Fragment)	B6I36_10150	Reference (non-duplicate)	NA	Sequence	COG0327;COG3323;
Methyltransferase	SAM-dependent methyltransferase	InterPro exported	Valid	PF12847 - IPR002678	PF01784;	IPR002678;IPR036069;IPR029063;	A0A1A9YSN1		Glossina fuscipes fuscipes (Riverine tsetse fly)	Uncharacterized protein	GfusI1:KK352759.1	duplicate	UniProt Fam - pfam/interpro;Pfam exported;	NA	NA
Methyltransferase	SAM-dependent methyltransferase	InterPro exported	Valid	PF12847 - IPR002678	PF01784;	IPR002678;IPR036069;IPR029063;	A0A1C6D8P3		uncultured Ruminococcus sp.	GTP cyclohydrolase 1 type 2 homolog	SAMEA3545397_01939	duplicate	UniProt Fam - pfam/interpro;	NA	NA
Methyltransferase	SAM-dependent methyltransferase	InterPro exported	Valid	PF12847 - IPR002678	PF01784;	IPR002678;IPR036069;IPR029063;	A0A1H6HY50		Ruminococcus flavefaciens	GTP cyclohydrolase 1 type 2 homolog	SAMN02910265_00464	duplicate	UniProt Fam - pfam/interpro;	NA	NA
Methyltransferase	SAM-dependent methyltransferase	InterPro exported	Valid	PF12847 - IPR002678	PF01784;	IPR002678;IPR036069;IPR029063;	A0A1H7K455		Ruminococcus flavefaciens	GTP cyclohydrolase 1 type 2 homolog	SAMN02910353_01331	duplicate	UniProt Fam - pfam/interpro;	NA	NA
Methyltransferase	SAM-dependent methyltransferase	InterPro exported	Valid	PF12847 - IPR002678	PF01784;	IPR002678;IPR036069;IPR029063;	A0A1K1P671		Ruminococcus flavefaciens	GTP cyclohydrolase 1 type 2 homolog	SAMN02910280_2533	duplicate	UniProt Fam - pfam/interpro;Pfam exported;	NA	NA
Methyltransferase	SAM-dependent methyltransferase	InterPro exported	Valid	PF12847 - IPR002678	PF01784;	IPR002678;IPR036069;IPR029063;	A0A1K1TH26		Ruminococcus flavefaciens	GTP cyclohydrolase 1 type 2 homolog	SAMN04487832_101158	duplicate	UniProt Fam - pfam/interpro;	NA	NA
Methyltransferase	SAM-dependent methyltransferase	InterPro exported	Valid	PF12847 - IPR002678	PF01784;	IPR002678;IPR036069;IPR029063;	A0A1M7J9A7		Ruminococcus flavefaciens	GTP cyclohydrolase 1 type 2 homolog	SAMN04487860_105208	duplicate	UniProt Fam - pfam/interpro;	NA	NA
Methyltransferase	SAM-dependent methyltransferase	InterPro exported	Valid	PF12847 - IPR002678	PF01784;	IPR002678;IPR036069;IPR029063;	A0A1Q6QDG2		Faecalibacterium sp. CAG:82-related	GTP cyclohydrolase 1 type 2 homolog	BHW25_00270	duplicate	UniProt Fam - pfam/interpro;	NA	NA
Methyltransferase	SAM-dependent methyltransferase	InterPro exported	Valid	PF12847 - IPR002678	PF01784;	IPR002678;IPR036069;IPR029063;	A0A1S9CP12		Epulopiscium sp. Nele67-Bin004	GTP cyclohydrolase 1 type 2 homolog	ATN35_04800	duplicate	UniProt Fam - pfam/interpro;	NA	NA
Methyltransferase	SAM-dependent methyltransferase	InterPro exported	Valid	PF12847 - IPR002678	PF01784;	IPR002678;IPR036069;IPR029063;	A0A1V5GPQ5		Firmicutes bacterium ADurb.BinA205	GTP cyclohydrolase 1 type 2 homolog	BWZ04_01074	duplicate	UniProt Fam - pfam/interpro;	NA	NA
Methyltransferase	SAM-dependent methyltransferase	InterPro exported	Valid	PF12847 - IPR002678	PF01784;	IPR002678;IPR036069;IPR029063;	A0A1Y4H6A9		Anaerofilum sp. An201	GTP cyclohydrolase 1 type 2 homolog	B5F36_09025	duplicate	UniProt Fam - pfam/interpro;Pfam exported;	NA	NA
Methyltransferase	SAM-dependent methyltransferase	InterPro exported	Valid	PF12847 - IPR002678	PF01784;	IPR002678;IPR036069;IPR029063;	A0A315XZ86		Ruminococcus flavefaciens	GTP cyclohydrolase 1 type 2 homolog	IE37_01553	duplicate	UniProt Fam - pfam/interpro;	NA	NA
Methyltransferase	SAM-dependent methyltransferase	InterPro exported	Valid	PF12847 - IPR002678	PF01784;	IPR002678;IPR036069;IPR029063;	A0A349GPI5		Ruminococcus sp.	GTP cyclohydrolase 1 type 2 homolog	DCS38_04445 DD392_04235 DIW26_05640	duplicate	UniProt Fam - pfam/interpro;	NA	NA
Methyltransferase	SAM-dependent methyltransferase	InterPro exported	Valid	PF12847 - IPR002678	PF01784;	IPR002678;IPR036069;IPR029063;	A0A351ZDZ0		Ruminococcus sp.	GTP cyclohydrolase 1 type 2 homolog	DCZ62_03165	duplicate	UniProt Fam - pfam/interpro;	NA	NA
Methyltransferase	SAM-dependent methyltransferase	InterPro exported	Valid	PF12847 - IPR002678	PF01784;	IPR002678;IPR036069;IPR029063;	A0A352DME4		Ruminococcus sp.	GTP cyclohydrolase 1 type 2 homolog	DCZ71_02070	duplicate	UniProt Fam - pfam/interpro;	NA	NA
Methyltransferase	SAM-dependent methyltransferase	InterPro exported	Valid	PF12847 - IPR002678	PF01784;	IPR002678;IPR036069;IPR029063;	A0A3C2BAW6		Ruminococcus sp.	GTP cyclohydrolase 1 type 2 homolog	DCQ78_02025	duplicate	UniProt Fam - pfam/interpro;	NA	NA
Methyltransferase	SAM-dependent methyltransferase	InterPro exported	Invalid	PF12847 - IPR002678	PF01784;	IPR002678;IPR036069;	A0A3D0NSV7	HCA54922.1	Ruminococcaceae bacterium	GTP cyclohydrolase 1 type 2 homolog	DEO95_05485	Reference (non-duplicate)	NA	Sequence	COG0327;COG3323;COG2384;
Methyltransferase	SAM-dependent methyltransferase	InterPro exported	Valid	PF12847 - IPR002678	PF01784;	IPR002678;IPR036069;IPR029063;	R6TVZ8		Clostridium sp. CAG:448	GTP cyclohydrolase 1 type 2 homolog	BN660_01681	duplicate	UniProt Fam - pfam/interpro;Pfam exported;	NA	NA
Methyltransferase	SAM-dependent methyltransferase	InterPro exported	Valid	PF12847 - IPR002678	PF01784;	IPR002678;IPR036069;IPR029063;	R7MPN5		Ruminococcus sp. CAG:624	GTP cyclohydrolase 1 type 2 homolog	BN739_01661	duplicate	UniProt Fam - pfam/interpro;Pfam exported;	NA	NA
Methyltransferase	SAM-dependent methyltransferase	InterPro exported	Valid	PF12847 - IPR002678	PF01784;	IPR002678;IPR036069;IPR029063;	W7V3L4		Ruminococcus flavefaciens 007c	GTP cyclohydrolase 1 type 2 homolog	RF007C_04640	duplicate	UniProt Fam - pfam/interpro;	NA	NA
FAD-/NAD-binding	UCP036654	InterPro exported	Valid	PF13450 - IPR003953 - IPR002678	PF00890;PF01784;	IPR003953;IPR036188;IPR002678;IPR036069;IPR027477;IPR014614;	A0A5N6DQ14		Aspergillus parasiticus	FAD	BDV34DRAFT_211822	duplicate	UniProt Fam - pfam/interpro;	NA	NA
FAD-/NAD-binding	UCP036654	InterPro exported	Valid	PF13450 - IPR003953 - IPR002678	PF00890;PF01784;	IPR003953;IPR036188;IPR002678;IPR036069;IPR027477;IPR014614;	A0A5N6H8H9		Aspergillus flavus	FAD	BDV35DRAFT_377281	duplicate	UniProt Fam - pfam/interpro;	NA	NA
FAD-/NAD-binding	UCP036654	InterPro exported	Valid	PF13450 - IPR003953 - IPR002678	PF00890;PF01784;	IPR003953;IPR036188;IPR002678;IPR036069;IPR027477;IPR014614;	A0A5N6VPU0		Aspergillus transmontanensis	FAD	BDV41DRAFT_566708	duplicate	UniProt Fam - pfam/interpro;	NA	NA
FAD-/NAD-binding	UCP036654	InterPro exported	Valid	PF13450 - IPR003953 - IPR002678	PF00890;PF01784;	IPR003953;IPR036188;IPR002678;IPR036069;IPR014614;	A0A5N6YEJ2		Aspergillus arachidicola	FAD	BDV24DRAFT_149442	duplicate	UniProt Fam - pfam/interpro;	NA	NA
FAD-/NAD-binding	UCP036654	InterPro exported	Valid	PF13450 - IPR003953 - IPR002678	PF00890;PF01784;	IPR003953;IPR036188;IPR002678;IPR036069;IPR027477;IPR014614;	A0A5N7A682		Aspergillus caelatus	FAD	BDV27DRAFT_144570	duplicate	UniProt Fam - pfam/interpro;	NA	NA
FAD-/NAD-binding	UCP036654	InterPro exported	Valid	PF13450 - IPR003953 - IPR002678	PF00890;PF01784;	IPR003953;IPR036188;IPR002678;IPR036069;IPR027477;IPR014614;	A0A5N7DQG0		Aspergillus pseudonomius	FAD	BDV37DRAFT_296464	duplicate	UniProt Fam - pfam/interpro;	NA	NA
FAD-/NAD-binding	UCP036654	InterPro exported	Valid	PF13450 - IPR003953 - IPR002678	PF00890;PF01784;	IPR003953;IPR036188;IPR002678;IPR036069;IPR014614;	A0A5N7DZX5		Aspergillus pseudocaelatus	FAD	BDV36DRAFT_288317	duplicate	UniProt Fam - pfam/interpro;	NA	NA
FAD-/NAD-binding	UCP036654	InterPro exported	Valid	PF13450 - IPR003953 - IPR002678	PF01784;PF00890;PF13450;	IPR002678;IPR014614;IPR003953;IPR027477;IPR036069;IPR036188;	A0A7G5JMQ9	QMW36901.1	Aspergillus flavus	Uncharacterized protein	G4B11_000137	Reference (non-duplicate)	NA	Sequence	COG3573;COG0327;COG1053;COG3323;COG0029;COG0665;COG3976;COG1232;COG0644;COG1231;COG0654;COG0492;COG3349;COG1635;
CIAO1/Cia1	5x WD40 repeats	InterPro exported	Valid	IPR001680 - IPR001680 - IPR001680 - IPR001680 - IPR001680 - IPR002678	PF01784;PF00400;	IPR028608;IPR002678;IPR036069;IPR015943;IPR001680;IPR019775;IPR017986;IPR036322;	A0A151JYK8		Trachymyrmex septentrionalis	Probable cytosolic iron-sulfur protein assembly protein Ciao1	Ciao1 ALC56_04640	duplicate	UniProt Fam - pfam/interpro;Pfam exported;	NA	NA
CIAO1/Cia1	5x WD40 repeats	InterPro exported	Valid	IPR001680 - IPR001680 - IPR001680 - IPR001680 - IPR001680 - IPR002678	PF01784;PF00400;	IPR028608;IPR002678;IPR036069;IPR015943;IPR001680;IPR019775;IPR017986;IPR036322;	A0A195BDN2		Atta colombica	Probable cytosolic iron-sulfur protein assembly protein Ciao1	Ciao1 ALC53_07293	duplicate	UniProt Fam - pfam/interpro;Pfam exported;	NA	NA
CIAO1/Cia1	5x WD40 repeats	InterPro exported	Valid	IPR001680 - IPR001680 - IPR001680 - IPR001680 - IPR001680 - IPR002678	PF01784;PF00400;	IPR028608;IPR020472;IPR002678;IPR036069;IPR015943;IPR001680;IPR019775;IPR017986;IPR036322;	A0A232F013		Trichomalopsis sarcophagae	WD	TSAR_007269	duplicate	UniProt Fam - pfam/interpro;Pfam exported;	NA	NA
CIAO1/Cia1	5x WD40 repeats	InterPro exported	Valid	IPR001680 - IPR001680 - IPR001680 - IPR001680 - IPR001680 - IPR002678	PF01784;PF00400;	IPR028608;IPR020472;IPR002678;IPR036069;IPR007110;IPR015943;IPR001680;IPR019775;IPR017986;IPR036322;	A0A6G0TSX2		Aphis glycines (Soybean aphid)	Probable cytosolic iron-sulfur protein assembly protein Ciao1	Ciao1 AGLY_006117	duplicate	UniProt Fam - pfam/interpro;UniProt Fam - pfam/interpro;	NA	NA
CIAO1/Cia1	5x WD40 repeats	InterPro exported	Valid	IPR001680 - IPR001680 - IPR001680 - IPR001680 - IPR001680 - IPR002678	PF01784;PF00400;	IPR028608;IPR002678;IPR036069;IPR015943;IPR001680;IPR019775;IPR017986;IPR036322;	E9IGK1		Solenopsis invicta (Red imported fire ant)	WD	SINV_00781	duplicate	UniProt Fam - pfam/interpro;	NA	NA
CIAO1/Cia1	5x WD40 repeats	InterPro exported	Valid	IPR003953 - IPR003953 - IPR002678	PF00890;PF01784;	IPR003953;IPR036188;IPR002678;IPR036069;IPR014614;	A0A5N6F509		Aspergillus novoparasiticus	FAD binding domain-containing protein	BDV33DRAFT_233137	duplicate	UniProt Fam - pfam/interpro;	NA	NA
CIAO1/Cia1	5x WD40 repeats	InterPro exported	Valid	IPR003953 - IPR003953 - IPR002678	PF00890;PF01784;	IPR003953;IPR036188;IPR002678;IPR036069;IPR027477;IPR014614;	A0A5N6HY31		Aspergillus pseudonomius	GTP cyclohydrolase 1 type 2/Nif3	BDV32DRAFT_138898	duplicate	UniProt Fam - pfam/interpro;	NA	NA
CIAO1/Cia1	5x WD40 repeats	InterPro exported	Valid	IPR003953 - IPR003953 - IPR002678	PF00890;PF01784;	IPR003953;IPR036188;IPR002678;IPR036069;IPR027477;IPR014614;	A0A5N6IWR4		Aspergillus minisclerotigenes	FAD binding domain-containing protein	BDV30DRAFT_228336	duplicate	UniProt Fam - pfam/interpro;	NA	NA
CIAO1/Cia1	5x WD40 repeats	InterPro exported	Valid	IPR003953 - IPR003953 - IPR002678	PF00890;PF01784;	IPR003953;IPR036188;IPR002678;IPR036069;IPR014614;	A0A5N6V5R0		Aspergillus tamarii	GTP cyclohydrolase 1 type 2/Nif3	BDV40DRAFT_285789	duplicate	UniProt Fam - pfam/interpro;	NA	NA
CIAO1/Cia1	5x WD40 repeats	InterPro exported	Valid	IPR003953 - IPR003953 - IPR002678	PF00890;PF01784;	IPR003953;IPR036188;IPR002678;IPR036069;IPR014614;	A0A5N6XDM1		Aspergillus sergii	FAD binding domain-containing protein	BDV39DRAFT_218683	duplicate	UniProt Fam - pfam/interpro;	NA	NA
RNase H	RNase HI (cd09279)	InterPro exported	Valid	IPR002678 - IPR002156	PF01784;PF13456;	IPR002678;IPR036069;IPR015867;IPR012337;IPR002156;IPR036397;	A0A1V5INW7	OPZ45899.1	Actinobacteria bacterium ADurb.BinA094	RNase H domain-containing protein	BWY94_01030	Reference (non-duplicate)	NA	Sequence	COG3323;COG0327;COG0328;COG3341;
RNase H	RNase HI (cd09279)	InterPro exported	Invalid	IPR002678 - IPR002156	PF01784;PF13456;	IPR002678;IPR036069;IPR015867;IPR012337;IPR002156;IPR036397;	A0A419GR92	RJQ44926.1	Gaiellales bacterium	RNase H domain-containing protein	C4534_05830	Reference (non-duplicate)	NA	Sequence	COG3323;COG0327;COG0328;COG3341;
RNase H	RNase HI (cd09279)	InterPro exported	Invalid	IPR002678 - IPR002156	PF01784;PF13456;	IPR002678;IPR036069;IPR015867;IPR012337;IPR002156;IPR036397;	A0A523BTI2	TDA65818.1	Clostridia bacterium	GTP cyclohydrolase 1 type 2 homolog	D9V47_11990	Reference (non-duplicate)	NA	Sequence	COG3323;COG0327;COG0328;COG3341;
RNase H	RNase HI (cd09279)	InterPro exported	Invalid	IPR002678 - IPR002156	PF01784;PF13456;	IPR002678;IPR036069;IPR015867;IPR012337;IPR002156;IPR036397;	A0A7C7DNN8	HHY38103.1	Clostridia bacterium	GTP cyclohydrolase 1 type 2 homolog	GX507_04160	Reference (non-duplicate)	NA	Sequence	COG3323;COG0327;COG0328;COG3341;
CIAO1/Cia1	6x WD40 repeats	InterPro exported	Valid	IPR001680 - IPR001680 - IPR001680 - IPR001680 - IPR001680 - IPR001680 - IPR002678	PF01784;PF00400;	IPR028608;IPR002678;IPR036069;IPR015943;IPR001680;IPR019775;IPR017986;IPR036322;	A0A0L7LPT1		Operophtera brumata (winter moth)	Probable cytosolic iron-sulfur protein assembly protein Ciao1	Ciao1 OBRU01_03987	duplicate	UniProt Fam - pfam/interpro;Pfam exported;	NA	NA
CIAO1/Cia1	6x WD40 repeats	InterPro exported	Valid	IPR001680 - IPR001680 - IPR001680 - IPR001680 - IPR001680 - IPR001680 - IPR002678	PF01784;PF00400;	IPR028608;IPR020472;IPR002678;IPR036069;IPR015943;IPR001680;IPR019775;IPR017986;IPR036322;	A0A0N7Z9M2		Rhodnius neglectus	Probable cytosolic iron-sulfur protein assembly protein Ciao1	JAI56440.1	duplicate	UniProt Fam - pfam/interpro;	NA	NA
CIAO1/Cia1	6x WD40 repeats	InterPro exported	Valid	IPR001680 - IPR001680 - IPR001680 - IPR001680 - IPR001680 - IPR001680 - IPR002678	PF01784;PF00400;	IPR028608;IPR002678;IPR036069;IPR015943;IPR001680;IPR019775;IPR017986;IPR036322;	A0A4S2KYR3		Temnothorax longispinosus	WD	DBV15_05086	duplicate	UniProt Fam - pfam/interpro;	NA	NA
CIAO1/Cia1	6x WD40 repeats	InterPro exported	Valid	IPR001680 - IPR001680 - IPR001680 - IPR001680 - IPR001680 - IPR001680 - IPR002678	PF01784;PF00400;	IPR028608;IPR002678;IPR036069;IPR015943;IPR001680;IPR019775;IPR017986;IPR036322;	A0A6V7GMX5		Cotesia congregata (Parasitoid wasp)	Probable cytosolic iron-sulfur protein assembly protein Ciao1	Ciao1 CCMSTLAB_LOCUS12147	duplicate	UniProt Fam - pfam/interpro;	NA	NA
Acetyltransferase	chromo-like domain containing	InterPro exported	Valid	IPR025995 - IPR040706 - IPR002717 - IPR002678	PF01853;PF01784;PF11717;PF17772;	IPR016181;IPR016197;IPR002678;IPR036069;IPR002717;IPR037906;IPR025995;IPR036388;IPR040706;	A0A182JW27		Anopheles christyi	Histone acetyltransferase	AchrA1:KB703659.1	duplicate	UniProt Fam - pfam/interpro;Pfam exported;	NA	NA
Acetyltransferase	chromo-like domain containing	InterPro exported	Valid	IPR025995 - IPR040706 - IPR002717 - IPR002678	PF01853;PF01784;PF11717;PF17772;	IPR016181;IPR016197;IPR002678;IPR036069;IPR002717;IPR037906;IPR025995;IPR036388;IPR040706;	A0A182W9B5		Anopheles minimus	Histone acetyltransferase	AminM1:KB663677.1	duplicate	UniProt Fam - pfam/interpro;Pfam exported;	NA	NA
Acetyltransferase	chromo-like domain containing	InterPro exported	Valid	IPR025995 - IPR040706 - IPR002717 - IPR002678	PF01853;PF01784;PF11717;PF17772;	IPR016181;IPR016197;IPR002678;IPR036069;IPR002717;IPR037906;IPR025995;IPR036388;IPR040706;	A0A182WZB9		Anopheles quadriannulatus (Mosquito)	Histone acetyltransferase	AquaS1:KB665599.1	duplicate	UniProt Fam - pfam/interpro;Pfam exported;	NA	NA
Acetyltransferase	GNAT	InterPro exported	Valid, conditional	IPR002678 - IPR000182	PF00583;PF01784;	IPR016181;IPR000182;IPR002678;IPR036069;	A0A7C3R0U3		Chloroflexi bacterium	N-acetyltransferase domain-containing protein	ENY06_15340	duplicate	UniProt Fam - pfam/interpro;	NA	NA
Acetyltransferase	GNAT	InterPro exported	Valid, conditional	IPR002678 - IPR000182	PF00583;PF01784;	IPR016181;IPR000182;IPR002678;IPR036069;	A0A7C5ASG6		Chloroflexi bacterium	N-acetyltransferase domain-containing protein	ENW85_02355	duplicate	UniProt Fam - pfam/interpro;	NA	NA
Acetyltransferase	GNAT	InterPro exported	Valid, conditional	IPR002678 - IPR000182	PF00583;PF01784;	IPR016181;IPR000182;IPR002678;IPR036069;	A0A7C6TES9		Chloroflexi bacterium	N-acetyltransferase domain-containing protein	GX714_05255	duplicate	UniProt Fam - pfam/interpro;	NA	NA
Tyrosine phosphatase	DSPc	InterPro exported	Valid, conditional	PF00782 - IPR002678	PF00782;PF01784;	IPR000340;IPR002678;IPR036069;IPR029021;IPR016130;IPR000387;IPR020422;	A0A367XR54		Candida viswanathii	NGG1-interacting factor 3	NIF3 Cantr_05866	duplicate	UniProt Fam - pfam/interpro;Pfam exported;	NA	NA
Tyrosine phosphatase	DSPc	InterPro exported	Valid, conditional	PF00782 - IPR002678	PF00782;PF01784;	IPR000340;IPR002678;IPR036069;IPR029021;IPR020422;	A0A642US31		Diutina rugosa (Yeast)	Tyrosine-protein phosphatase domain-containing protein	DIURU_002048	duplicate	UniProt Fam - pfam/interpro;	NA	NA
Zinc finger	RING type; LisH dimerization motif containing	InterPro exported	Valid, conditional	IPR002678 - IPR027370	PF01784;PF13445;	IPR002678;IPR036069;IPR027370;IPR001841;IPR013083;IPR017907;	A0A6A5SX80		Clathrospora elynae	RING-type domain-containing protein	EJ02DRAFT_509786	duplicate	UniProt Fam - pfam/interpro;	NA	NA
Zinc finger	RING type; LisH dimerization motif containing	InterPro exported	Valid, conditional	IPR002678 - IPR027370	PF01784;PF13445;	IPR016197;IPR002678;IPR036069;IPR027370;IPR001841;IPR013083;IPR017907;	A0A6A5UCW4		Byssothecium circinans	RING-type domain-containing protein	CC80DRAFT_533913	duplicate	UniProt Fam - pfam/interpro;	NA	NA
Zinc finger	RING type; C4-type zinc ribbon domain	InterPro exported	Valid	IPR002678 - IPR003743	PF01784;PF02591;	IPR002678;IPR036069;IPR003743;	A0A4D4KYB2		Streptomyces violaceusniger	zf-RING	SVIO_037870	duplicate	UniProt Fam - pfam/interpro;	NA	NA
Zinc finger	RING type; C4-type zinc ribbon domain	InterPro exported	Valid	IPR002678 - IPR003743	PF01784;PF02591;	IPR002678;IPR036069;IPR003743;	Q7MQP7		Wolinella succinogenes (strain ATCC 29543 / DSM 1740 / LMG 7466 / NCTC 11488 / FDC 602W)	zf-RING	WS2117	duplicate	UniProt Fam - pfam/interpro;Pfam exported;	NA	NA
Sulfurtransferase	Rhodanese	InterPro exported	Valid, conditional	IPR001763 - IPR002678	PF01784;PF00581;	IPR002678;IPR036069;IPR001763;IPR036873;	A0A1Q9NQ61		Candidatus Heimdallarchaeota archaeon LC	Rhodanese domain-containing protein	glpE HeimC3_21490	duplicate	UniProt Fam - pfam/interpro;	NA	NA
Sulfurtransferase	Rhodanese	InterPro exported	Valid, conditional	IPR001763 - IPR002678	PF01784;PF00581;	IPR002678;IPR036069;IPR001763;IPR036873;	A0A523S1I0		Thorarchaeota archaeon (strain OWC)	Rhodanese domain-containing protein	E3J86_02190	duplicate	UniProt Fam - pfam/interpro;	NA	NA
Conserved oligomeric Golgi complex	COG, subunit 6 (COG6)	InterPro exported	Inconclusive	IPR010490 - IPR002678	PF06419;PF01784;	IPR010490;IPR002678;IPR036069;	A0A364N878		Stemphylium lycopersici	Conserved oligomeric Golgi complex subunit 6	DDE83_003127	duplicate	UniProt Fam - pfam/interpro;Pfam exported;	NA	NA
Conserved oligomeric Golgi complex	COG, subunit 6 (COG6)	InterPro exported	Inconclusive	IPR010490 - IPR002678	PF06419;PF01784;	IPR010490;IPR002678;IPR036069;	A0A3M7MGS3		Pyrenophora seminiperda CCB06	Conserved oligomeric Golgi complex subunit 6	GMOD_00009415	duplicate	UniProt Fam - pfam/interpro;	NA	NA
Peptidase dimerisation domain		InterPro exported	Invalid	IPR002678 - IPR011650	PF07687;PF01784;	IPR001261;IPR036264;IPR002678;IPR036069;IPR011650;IPR010161;	A0A6P4JX33		Drosophila bipectinata (Fruit fly)	M20	LOC108118951	duplicate	UniProt Fam - pfam/interpro;	NA	NA
Methyltransferase	mRNA (guanine-N(7))-methyltransferase domain	InterPro exported	Invalid	IPR004971 - IPR002678	PF01784;PF03291;	IPR002678;IPR036069;IPR004971;IPR015867;	X1K8X0		marine sediment metagenome	mRNA cap 0 methyltransferase domain-containing protein	S06H3_05697	duplicate	UniProt Fam - pfam/interpro;	NA	NA
Tyrosine phosphatase	DSPc﻿	InterPro exported	Low confidence validity	PF00782 - IPR002678 - PF13854	PF00782;PF01784;	IPR000210;IPR000340;IPR002678;IPR036069;IPR015915;IPR029021;IPR011333;IPR016130;IPR003595;IPR000387;IPR020422;	A0A421JMT5		Spathaspora sp. JA1	NGG1-interacting factor 3	JA1_003263	duplicate	UniProt Fam - pfam/interpro;Pfam exported;	NA	NA
Aminotransferase	Aminotransferase, class I/classII	InterPro exported	Valid, conditional	IPR004839 - IPR002678	PF00155;PF01784;	IPR004839;IPR002678;IPR036069;IPR015867;IPR004838;IPR015424;IPR015422;IPR015421;	R4MJN9		Mycobacterium tuberculosis CAS/NITR204	Aminotransferase	J113_15520	duplicate	UniProt Fam - pfam/interpro;	NA	NA
FAD-/NAD-binding	FAD-dependent oxidoreductase 2, FAD binding domain	InterPro exported	Valid, conditional	IPR003953 - IPR002678	PF00890;PF01784;	IPR003953;IPR036188;IPR002678;IPR036069;IPR027477;IPR014614;	A0A0F0I4C6		Aspergillus parasiticus (strain ATCC 56775 / NRRL 5862 / SRRC 143 / SU-1)	FAD	P875_00095268	duplicate	UniProt Fam - pfam/interpro;Pfam exported;	NA	NA
Phosphoesterase	Calcineurin-like phosphoesterase domain, ApaH type	InterPro exported	Invalid	IPR004843 - IPR002678	PF00149;PF01784;	IPR004843;IPR002678;IPR029052;IPR041796;IPR014576;	A0A4Q0VS05	RXI99876.1	Bacillaceae bacterium B16-10	Metallophos domain-containing protein	DS745_13435	Reference (non-duplicate)	NA	Sequence	COG0420;COG1408;COG2129;COG1407;COG0622;COG0639;COG2908;
ABC transporter component	Solute-binding protein family 5	InterPro exported	Invalid	IPR002678 - IPR000914	PF01784;PF00496;	IPR002678;IPR036069;IPR039424;IPR000914;	A0A0F8YPV6		marine sediment metagenome	SBP	LCGC14_2793320	duplicate	UniProt Fam - pfam/interpro;	NA	NA
Sensor histidine kinase inhibitor	KipI family with carboxyltransferase/allophanate hydrolase subunit domain	InterPro exported	Invalid	IPR002678 - IPR003833 - IPR003778	PF02626;PF02682;PF01784;	IPR003778;IPR003833;IPR029000;IPR002678;IPR036069;IPR010016;	A0A0A2VUI6		Beauveria bassiana D1-5	Uncharacterized protein ybgK	BBAD15_g2974	duplicate	UniProt Fam - pfam/interpro;Pfam exported;	NA	NA
Nur1/Mug154 (unknown function)	with small predicted transmembrane domain	InterPro exported	Invalid	IPR018819 - IPR002678	PF10332;PF01784;	IPR002678;IPR036069;IPR018819;	A0A1R0H439		Smittium mucronatum	Protein NIF3-like protein	AYI68_g1946	duplicate	UniProt Fam - pfam/interpro;Pfam exported;	NA	NA
Transposase	Transposase IS200-like	InterPro exported	Invalid	IPR002686 - IPR002678	PF01784;PF01797;	IPR002678;IPR002686;IPR036515;	A0A1V6DZ24	OQB94361.1	Verrucomicrobia bacterium ADurb.Bin118	Y1	BWX84_00220	Reference (non-duplicate)	NA	Sequence	COG1943;
Alpha-D-phosphohexomutase	Alpha-D-phosphohexomutase, alpha/beta/alpha domain I	InterPro exported	Invalid	IPR005844 - IPR002678	PF01784;PF02878;	IPR005844;IPR016055;IPR002678;IPR036069;	A0A1A9X722		Glossina fuscipes fuscipes (Riverine tsetse fly)	PGM	GfusI1:JFJR01012816.1	duplicate	UniProt Fam - pfam/interpro;Pfam exported;	NA	NA
Zinc finger	THAP-type; THAP-type zinc finger	InterPro exported	Valid, conditional	IPR006612 - IPR002678	PF01784;PF05485;	IPR002678;IPR006612;IPR036069;IPR038441;	A0A7E5WP16	XP_026742495.1	Trichoplusia ni (Cabbage looper)	NIF3-like protein 1 isoform X1	LOC113504423	Reference (non-duplicate)	NA	Sequence	COG0327;COG3323;
Histidine phosphatase	Histidine phosphatase superfamily, clade-1	InterPro exported	Valid, conditional	IPR002678 - IPR013078	PF00300;PF01784;	IPR002678;IPR036069;IPR013078;IPR029033;IPR015867;	A0A0U1DR76		Mycolicibacterium conceptionense	Dinuclear metal center protein, YbgI/ family	BN970_04936	duplicate	UniProt Fam - pfam/interpro;	NA	NA
Citrate synthase	Citrate synthase	InterPro exported	Invalid	IPR002020 - IPR002678	PF00285;PF01784;	IPR002020;IPR036969;IPR002678;IPR036069;IPR015867;	A0A2A4LVD4		Flavobacteriaceae bacterium	Nif3-like dinuclear metal center hexameric protein	COC22_04850	duplicate	UniProt Fam - pfam/interpro;	NA	NA
Synthetase; Carboxylase; Oxidoreductase	Acetyl-CoA carboxylase, biotin carboxylase	InterPro exported	Invalid	IPR002678 - IPR000440 - IPR006137 - IPR005481 - IPR005479 - IPR005482	PF02785;PF00289;PF02786;PF01784;PF00507;PF01058;	IPR004549;IPR011761;IPR013815;IPR005481;IPR011764;IPR005482;IPR005479;IPR002678;IPR036069;IPR000440;IPR006137;IPR006138;IPR038430;IPR016185;IPR011054;	A0A6A5L104		Lupinus albus (White lupine)	Acetyl-CoA carboxylase subunit A	Lal_00008608	duplicate	UniProt Fam - pfam/interpro;	NA	NA
FAD-/NAD-binding	UCP036654	InterPro exported	Valid, conditional	IPR007219 - PF13450 - IPR003953 - IPR002678	PF01784;PF00890;PF04082;PF13450;	IPR002678;IPR014614;IPR003953;IPR007219;IPR036069;IPR036188;	A0A7G5INF9	QMW24901.1	Aspergillus flavus (strain ATCC 200026 / FGSC A1120 / NRRL 3357 / JCM 12722 / SRRC 167)	Uncharacterized protein	G4B84_000146	Reference (non-duplicate)	NA	Sequence	COG3573;COG0327;COG1053;COG3323;COG0665;COG0029;COG3976;COG1232;COG1231;COG0644;COG0492;COG0654;COG3349;COG1635;COG2072;COG2509;
Sugar isomerase (SIS)	Glucose-6-phosphate isomerase like protein, domain 1	InterPro exported	Invalid	IPR001347 - IPR002678	PF01784;PF13580;	IPR002678;IPR036069;IPR001347;	A0A7C4PHT4		Armatimonadetes bacterium	SIS domain-containing protein	ENT29_05425	duplicate	UniProt Fam - pfam/interpro;	NA	NA
Transcription factor	with EF-hand domain pair, proline dehydrogenase domains	InterPro exported	Invalid	IPR002048 - IPR002048 - IPR002678 - IPR001699 - IPR002872	PF13499;PF01784;PF01619;PF00907;	IPR011992;IPR018247;IPR002048;IPR029041;IPR002678;IPR036069;IPR008967;IPR002872;IPR036960;IPR001699;IPR018186;	A0A6A4S227		Scophthalmus maximus (Turbot)	Uncharacterized protein	F2P81_022263	duplicate	UniProt Fam - pfam/interpro;	NA	NA
CIAO1/Cia1	6x WD40 repeats	InterPro exported	Valid, conditional	IPR001680 - IPR001680 - IPR001680 - IPR001680 - IPR002678	PF01784;PF00400;	IPR028608;IPR002678;IPR036069;IPR015943;IPR001680;IPR019775;IPR017986;IPR036322;	A0A3L8DRM5		Ooceraea biroi (Clonal raider ant)	Probable cytosolic iron-sulfur protein assembly protein Ciao1	Ciao1 DMN91_005329	duplicate	UniProt Fam - pfam/interpro;	NA	NA
Bacillithiol biosynthesis BshC		InterPro exported	Invalid	IPR002678 - IPR011199	PF10079;PF01784;	IPR011199;IPR002678;IPR036069;	A0A4Q5Z3B0		Chitinophagaceae bacterium	Bacillithiol biosynthesis BshC	bshC EOO10_03800	duplicate	UniProt Fam - pfam/interpro;	NA	NA
Methyltransferase	SAM-dependent methyltransferase; tRNA methyltransferase, TrmK	InterPro exported	Valid, conditional	IPR006901 - IPR002678	PF01784;PF04816;	IPR002678;IPR036069;IPR029063;IPR006901;	A0A1H8ZHI3		Ignavigranum ruoffiae	GTP cyclohydrolase 1 type 2 homolog	SAMN04488558_101250	duplicate	UniProt Fam - pfam/interpro;Pfam exported;	NA	NA
Vps51/Vps67		InterPro exported	Invalid	PF08700 - IPR002678	PF01784;	IPR002678;IPR036069;	A0A366R6D8	RBR12721.1	Gibberella moniliformis (Maize ear and stalk rot fungus)	Uncharacterized protein	FVER53590_04993	Reference (non-duplicate)	NA	Sequence	COG0327;COG3323;
Mitochondrial import inner membrane translocase	Subunit Tim54, cytoplasmic domain	InterPro exported	Invalid	IPR002678 - IPR021056	PF01784;PF11711;	IPR002678;IPR036069;IPR021056;	Q5B6Z5		Emericella nidulans (strain FGSC A4 / ATCC 38163 / CBS 112.46 / NRRL 194 / M139)	Mitochondrial import inner membrane translocase subunit TIM54	AN3685.2	duplicate	UniProt Fam - pfam/interpro;	NA	NA
BolA-like	BolA protein; Phosphatidylinositol 3-kinase Catalytic Subunit, Chain A, domain 1 (G3DSA)	InterPro exported	Valid, conditional	IPR002678 - IPR002634	PF01722;PF01784;	IPR002634;IPR036065;IPR002678;IPR036069;	A0A6M7YMR5		Fusarium oxysporum Fo47	Uncharacterized protein	FOBC_03738	duplicate	UniProt Fam - pfam/interpro;	NA	NA
CIAO1/Cia1	WD40 repeat	InterPro exported	Invalid	IPR001680 - IPR001680 - IPR001680 - IPR001680 - IPR001680 - IPR002678 - IPR002678	PF01784;PF00400;	IPR002678;IPR028608;IPR017986;IPR015943;IPR036069;IPR036322;IPR001680;IPR019775;	A0A7E4REF5	CLEC001396	Cimex lectularius (Bed bug)	Uncharacterized protein	ClecH1:Scaffold5	Reference (non-duplicate)	NA	Sequence	COG2319;COG0327;COG4916;COG3323;COG4946;
NUDIX hydrolase	ADP-ribose pyrophosphatase (ADPRase) (cd03424)	InterPro exported	Valid, conditional	IPR002678 - IPR000086	PF01784;PF00293;	IPR002678;IPR036069;IPR020476;IPR015797;IPR020084;IPR000086;	A0A087E9N5		Bifidobacterium subtile	Nudix hydrolase domain-containing protein	BISU_0493	duplicate	UniProt Fam - pfam/interpro;Pfam exported;	NA	NA
APS kinase; Aminotransferase	HisG (Aminotransferase, class I/classII); with suphalte adenylyltransferase subunit domains;	InterPro exported	Invalid	IPR013820 - IPR012131 - IPR004839 - IPR002678 - IPR002500 - IPR012657 - IPR000795 - PF01583	PF05635;PF00155;PF00009;PF01634;PF00815;PF01784;PF01507;	IPR012657;IPR036583;IPR016161;IPR001917;IPR004839;IPR002891;IPR013820;IPR018198;IPR024893;IPR041757;IPR044138;IPR044139;IPR031157;IPR002678;IPR036069;IPR005861;IPR001692;IPR012131;IPR027417;IPR002500;IPR015424;IPR015422;IPR015421;IPR014729;IPR005225;IPR011779;IPR011784;IPR000795;IPR009000;IPR009001;	A0A699HSW0		Tanacetum cinerariifolium (Dalmatian daisy)	APS kinase	Tci_432192	duplicate	UniProt Fam - pfam/interpro;	NA	NA
FAD-/NAD-binding	Short-chain dehydrogenase/reductase SDR	InterPro exported	Invalid	IPR002678 - IPR002347	PF00106;PF01784;	IPR002678;IPR036069;IPR036291;IPR002347;	V5FCQ5		Byssochlamys spectabilis (strain No. 5 / NBRC 109023)	NGG1 interacting factor Nif3, putative	PVAR5_3453	duplicate	UniProt Fam - pfam/interpro;Pfam exported;	NA	NA
Cyclophilin-like	Cyclophilin TM1367-like domain	InterPro exported	Invalid	IPR002678 - IPR025658	PF04126;PF01784;	IPR029000;IPR025658;IPR002678;IPR036069;IPR015867;	X1JV56		marine sediment metagenome	Cyclophil	S06H3_04639	duplicate	UniProt Fam - pfam/interpro;	NA	NA
Heterokaryon incompatibility protein (HET)		InterPro exported	Invalid	IPR002678 - IPR010730	PF06985;PF01784;	IPR002678;IPR036069;IPR010730;	A0A1V8V835		Rachicladosporium sp. CCFEE 5018	HET domain-containing protein	B0A51_00665	duplicate	UniProt Fam - pfam/interpro;Pfam exported;	NA	NA
Cytochrome P450		InterPro exported	Low confidence validity	IPR001128 - IPR002678	PF01784;PF00067;	IPR001128;IPR036396;IPR002678;IPR036069;	A0A4Y9ZJE9		Hericium alpestre	Uncharacterized protein	EWM64_g10031	duplicate	UniProt Fam - pfam/interpro;	NA	NA
Spore germination GerAC		InterPro exported	Invalid	IPR008844 - IPR002678	PF01784;PF05504;	IPR002678;IPR036069;IPR008844;	A0A356U768		Syntrophomonas sp.	GTP cyclohydrolase 1 type 2 homolog	DD791_00690	duplicate	UniProt Fam - pfam/interpro;	NA	NA
CIAO1/Cia1	6x WD40 repeats	InterPro exported	Valid, conditional	IPR001680 - IPR001680 - IPR001680 - IPR001680 - IPR001680 - IPR001680 - IPR001680 - IPR002678	PF01784;PF00400;	IPR028608;IPR002678;IPR036069;IPR015943;IPR001680;IPR019775;IPR017986;IPR036322;	A0A139WBU3		Tribolium castaneum (Red flour beetle)	Probable cytosolic iron-sulfur protein assembly protein Ciao1	Ciao1 TcasGA2_TC031250	duplicate	UniProt Fam - pfam/interpro;Pfam exported;	NA	NA
Uncategorized/Singleton	with EF-hand domain pair	InterPro exported	Invalid	IPR002048 - IPR002048 - IPR002678	PF13499;PF01784;	IPR011992;IPR018247;IPR002048;IPR002678;IPR036069;	A0A4U5VMZ5		Collichthys lucidus (Big head croaker)	NIF3-like protein 1	D9C73_024003	duplicate	UniProt Fam - pfam/interpro;	NA	NA
Fumarylacetoacetase-like, C-terminal domain	Fumarylacetoacetase-like, C-terminal	InterPro exported	Low confidence validity	IPR002678 - IPR011234	PF01557;PF01784;	IPR011234;IPR036663;IPR002678;IPR036069;	A0A6L5C9Q7		Ephemera danica	FAA	B566_EDAN003211	duplicate	UniProt Fam - pfam/interpro;	NA	NA
FAD-/NAD-binding	UCP036654; with transcription factor domain	InterPro exported	Valid, conditional	IPR007219 - IPR003953 - IPR002678	PF00890;PF04082;PF01784;	IPR003953;IPR036188;IPR002678;IPR036069;IPR027477;IPR007219;IPR014614;	A0A1S9D5J2		Aspergillus oryzae (Yellow koji mold)	Fungal	OAory_01052200	duplicate	UniProt Fam - pfam/interpro;Pfam exported;	NA	NA
23S rRNA-intervening sequence protein		InterPro exported	Invalid	IPR012657 - IPR002678	PF05635;PF01784;	IPR012657;IPR036583;IPR002678;IPR036069;IPR015867;	A0A521GHL1		Cytophagales bacterium	Nif3-like dinuclear metal center hexameric protein	EAZ91_05430	duplicate	UniProt Fam - pfam/interpro;	NA	NA
Transcription factor	CheY-like family; with winged helix-like DNA-binding domain	InterPro exported	Invalid	IPR000232 - IPR001789 - IPR002678	PF00447;PF01784;PF00072;	IPR011006;IPR002678;IPR036069;IPR000232;IPR027725;IPR001789;IPR027718;IPR036388;IPR036390;	A0A3M7N688		Chaetothyriales sp. CBS 135597	Response regulatory domain-containing protein	DV738_g1916	duplicate	UniProt Fam - pfam/interpro;	NA	NA
Uncategorized/Singleton	with EF-hand domain pair	InterPro exported	Invalid	IPR002048 - IPR002048 - IPR002678	PF13499;PF13833;PF01784;	IPR011992;IPR018247;IPR002048;IPR002678;IPR036069;	A0A498N151		Labeo rohita (Indian major carp)	NIF3 1	ROHU_006714	duplicate	UniProt Fam - pfam/interpro;Pfam exported;	NA	NA
Histone H2A		InterPro exported	Invalid	IPR007125 - IPR032454 - IPR002678	PF00125;PF16211;PF01784;	IPR002678;IPR036069;IPR009072;IPR002119;IPR007125;IPR032454;IPR032458;	A0A177B8B7		Intoshia linei	Histone H2A	A3Q56_01891	duplicate	UniProt Fam - pfam/interpro;	NA	NA
Chromatin modification-related protein Eaf7/MRGBP	InterPro exported	Invalid	IPR012423 - IPR002678	PF07904;PF01784;	IPR012423;IPR002678;IPR036069;	A0A0F7SRZ4		Phaffia rhodozyma (Yeast)	Ngg1-interacting factor 3 protein NIF3L1	CED83424.1	duplicate	UniProt Fam - pfam/interpro;	NA	NA
CIAO1/Cia1	3x WD40 repeats	InterPro exported	Valid, conditional	IPR001680 - IPR001680 - IPR001680 - IPR002678	PF01784;PF00400;	IPR002678;IPR036069;IPR015943;IPR001680;IPR019775;IPR017986;IPR036322;	A0A067R4D1		Zootermopsis nevadensis (Dampwood termite)	WD	L798_07717	duplicate	UniProt Fam - pfam/interpro;UniProt Fam - pfam/interpro;Pfam exported;	NA	NA
Uncategorized/Singleton	Targeting protein for Xklp2 (TPX2) domain	InterPro exported	Valid, conditional	IPR002678 - IPR027329	PF01784;PF06886;	IPR002678;IPR036069;IPR027329;	A0A0W0F5B4		Moniliophthora roreri	TPX2 domain-containing protein	WG66_15991	duplicate	UniProt Fam - pfam/interpro;Pfam exported;	NA	NA
Sensor histidine kinase inhibitor	KipI family with carboxyltransferase/allophanate hydrolase subunit domain, plus PxpA-like domain	InterPro exported	Invalid	IPR002678 - IPR003833 - IPR003778 - IPR005501	PF02626;PF02682;PF03746;PF01784;	IPR003778;IPR003833;IPR029000;IPR011330;IPR002678;IPR036069;IPR010016;IPR005501;	A0A077ZC64		Trichuris trichiura (Whipworm)	LamB YcsF and AHS2 and AHS1 and NIF3 domain conta ining protein	TTRE_0000628301	duplicate	UniProt Fam - pfam/interpro;Pfam exported;	NA	NA
Flavivirus non-structural protein NS4B		InterPro exported	Invalid	IPR002678 - IPR001528	PF01349;PF01784;	IPR001528;IPR002678;IPR036069;	A0A2N2VWA3		Bacteroidetes bacterium HGW-Bacteroidetes-7	Flavi	CVU12_06560	duplicate	UniProt Fam - pfam/interpro;	NA	NA
HAD-like	HAD hydrolase, subfamily IA	InterPro exported	Invalid	IPR041492 - IPR002678	PF13419;PF01784;	IPR002678;IPR036412;IPR006439;IPR041492;IPR023214;	A0A388TE31	GBR74780.1	Candidatus Termititenax aidoneus	Haloacid dehalogenase superfamily hydrolase	NO1_1901	Reference (non-duplicate)	NA	Sequence	COG0546;COG0327;COG0637;COG1339;COG3323;COG1011;COG0241;COG2179;
Metalloenzyme, LuxS/M16 peptidase-like	Peptidase M16, C-terminal	InterPro exported	Invalid	IPR002678 - IPR007863	PF01784;PF05193;	IPR002678;IPR036069;IPR011249;IPR015867;IPR007863;	A0A519L9B3		Chryseobacterium sp.	Peptidase	EOO19_10785	duplicate	UniProt Fam - pfam/interpro;	NA	NA
Methyltransferase	SAM-dependent methyltransferase	Pfam exported	Valid	Methyltransf_18, NIF3	PF01784﻿;	IPR002678;IPR036069;IPR029063;	A0A1A9YSN1		Glossina fuscipes fuscipes	Uncharacterized protein	GfusI1:KK352759.1	duplicate	UniProt Fam - pfam/interpro;InterPro exported;	NA	NA
Methyltransferase	SAM-dependent methyltransferase	Pfam exported	Valid	Methyltransf_18, NIF3	PF01784﻿;	IPR002678;IPR036069;IPR029063;	A0A1K1P671		Ruminococcus flavefaciens	GTP cyclohydrolase 1 type 2 homolog	SAMN02910280_2533	duplicate	UniProt Fam - pfam/interpro;InterPro exported;	NA	NA
Methyltransferase	SAM-dependent methyltransferase	Pfam exported	Valid	Methyltransf_18, NIF3	PF01784﻿;	IPR002678;IPR036069;IPR029063;	A0A1Y4H6A9		Anaerofilum sp. An201	GTP cyclohydrolase 1 type 2 homolog	B5F36_09025	duplicate	UniProt Fam - pfam/interpro;InterPro exported;	NA	NA
Methyltransferase	SAM-dependent methyltransferase	Pfam exported	Valid	Methyltransf_18, NIF3	PF01784﻿;	IPR002678;IPR036069;IPR029063;	R6TVZ8		Clostridium sp. CAG:448	GTP cyclohydrolase 1 type 2 homolog	BN660_01681	duplicate	UniProt Fam - pfam/interpro;InterPro exported;	NA	NA
Methyltransferase	SAM-dependent methyltransferase	Pfam exported	Valid	Methyltransf_18, NIF3	PF01784﻿;	IPR002678;IPR036069;IPR029063;	R7MPN5		Ruminococcus sp. CAG:624	GTP cyclohydrolase 1 type 2 homolog	BN739_01661	duplicate	UniProt Fam - pfam/interpro;InterPro exported;	NA	NA
CIAO1/Cia1	x5 WD40 repeat (pfam)	Pfam exported	Valid	WD40 x 5, NIF3	PF01784﻿;PF00400;	IPR028608;IPR002678;IPR036069;IPR015943;IPR001680;IPR019775;IPR017986;IPR036322;	A0A151JYK8		Trachymyrmex septentrionalis	Probable cytosolic iron-sulfur protein assembly protein Ciao1	Ciao1 ALC56_04640	duplicate	UniProt Fam - pfam/interpro;InterPro exported;	NA	NA
CIAO1/Cia1	x5 WD40 repeat (pfam)	Pfam exported	Valid	WD40 x 5, NIF3	PF01784﻿;PF00400;	IPR028608;IPR002678;IPR036069;IPR015943;IPR001680;IPR019775;IPR017986;IPR036322;	A0A195BDN2		Atta colombica	Probable cytosolic iron-sulfur protein assembly protein Ciao1	Ciao1 ALC53_07293	duplicate	UniProt Fam - pfam/interpro;InterPro exported;	NA	NA
CIAO1/Cia1	x5 WD40 repeat (pfam)	Pfam exported	Valid	WD40 x 5, NIF3	PF01784﻿;PF00400;	IPR028608;IPR020472;IPR002678;IPR036069;IPR015943;IPR001680;IPR019775;IPR017986;IPR036322;	A0A232F013		Trichomalopsis sarcophagae	WD_REPEATS_REGION domain-containing protein	TSAR_007269	duplicate	UniProt Fam - pfam/interpro;InterPro exported;	NA	NA
Acetyltransferase	chromo-like domain containing	Pfam exported	Valid	Tudor-knot, zf-MYST, MOZ_SAS, NIF3	PF01853;PF01784;PF11717;PF17772;	IPR016181;IPR016197;IPR002678;IPR036069;IPR002717;IPR037906;IPR025995;IPR036388;IPR040706;	A0A182JW27		Anopheles christyi	Histone acetyltransferase, EC 2.3.1.48	AchrA1:KB703659.1	duplicate	UniProt Fam - pfam/interpro;InterPro exported;	NA	NA
Acetyltransferase	chromo-like domain containing	Pfam exported	Valid	Tudor-knot, zf-MYST, MOZ_SAS, NIF3	PF01853;PF01784;PF11717;PF17772;	IPR016181;IPR016197;IPR002678;IPR036069;IPR002717;IPR037906;IPR025995;IPR036388;IPR040706;	A0A182W9B5		Anopheles minimus	Histone acetyltransferase, EC 2.3.1.48	AminM1:KB663677.1	duplicate	UniProt Fam - pfam/interpro;InterPro exported;	NA	NA
Acetyltransferase	chromo-like domain containing	Pfam exported	Valid	Tudor-knot, zf-MYST, MOZ_SAS, NIF3	PF01853;PF01784;PF11717;PF17772;	IPR016181;IPR016197;IPR002678;IPR036069;IPR002717;IPR037906;IPR025995;IPR036388;IPR040706;	A0A182WZB9		Anopheles quadriannulatus	Histone acetyltransferase, EC 2.3.1.48	AquaS1:KB665599.1	duplicate	UniProt Fam - pfam/interpro;InterPro exported;	NA	NA
CIAO1/Cia1	x7 WD40 repeat (pfam)	Pfam exported	Valid	WD40 x 7, NIF3	PF01784;PF00400;	IPR028608;IPR002678;IPR036069;IPR015943;IPR001680;IPR019775;IPR017986;IPR036322;	A0A139WBU3		Tribolium castaneum	Probable cytosolic iron-sulfur protein assembly protein Ciao1	Ciao1 TcasGA2_TC031250	duplicate	UniProt Fam - pfam/interpro;InterPro exported;	NA	NA
Uncategorized/Singleton	Targeting protein for Xklp2 (TPX2) domain	Pfam exported	Valid, conditional	NIF3, TPX2	PF01784﻿;PF06886;	IPR002678;IPR036069;IPR027329;	A0A0W0F5B4		Moniliophthora roreri	TPX2 domain-containing protein	WG66_15991	duplicate	UniProt Fam - pfam/interpro;InterPro exported;	NA	NA
FAD-/NAD-binding	UCP036654	Pfam exported	Valid	FAD_binding_2, NIF3	PF00890;PF01784;	IPR003953;IPR036188;IPR002678;IPR036069;IPR027477;IPR014614;	A0A0F0I4C6		Aspergillus parasiticus (strain ATCC 56775 / NRRL 5862 / SRRC 143 / SU-1)	NIF3 NGG1p interacting factor 3	P875_00095268	duplicate	UniProt Fam - pfam/interpro;InterPro exported;	NA	NA
Sensor histidine kinase inhibitor	KipI family with carboxyltransferase/allophanate hydrolase subunit domain, plus PxpA-like domain	Pfam exported	Invalid	NIF3, CT_C_D, CT_A_B, LamB_YcsF	PF02626;PF02682;PF01784;	IPR003778;IPR003833;IPR029000;IPR011330;IPR002678;IPR036069;IPR010016;IPR005501;	A0A077ZC64		Trichuris trichiura	LamB YcsF and AHS2 and AHS1 and NIF3 domain conta ining protein	TTRE_0000628301	duplicate	UniProt Fam - pfam/interpro;InterPro exported;	NA	NA
Tyrosine phosphatase	DSPc﻿	Pfam exported	Low confidence validity	DSPc, NIF3, Kelch_5	PF00782;PF01784;	IPR000210;IPR000340;IPR002678;IPR036069;IPR015915;IPR029021;IPR011333;IPR016130;IPR003595;IPR000387;IPR020422;	A0A421JMT5		Spathaspora sp. JA1	NGG1-interacting factor 3	JA1_003263	duplicate	UniProt Fam - pfam/interpro;InterPro exported;	NA	NA
Conserved oligomeric Golgi complex	COG, subunit 6 (COG6)	Pfam exported	Inconclusive	COG6, NIF3	PF06419;PF01784;	IPR010490;IPR002678;IPR036069;	A0A364N878		Stemphylium lycopersici	Conserved oligomeric Golgi complex subunit 6, COG complex subunit 6 (Component of oligomeric Golgi complex 6)	DDE83_003127	duplicate	UniProt Fam - pfam/interpro;InterPro exported;	NA	NA
Nur1/Mug154 (unknown function)	with small predicted transmembrane domain	Pfam exported	Invalid	DUF2418, NIF3	PF10332;PF01784;	IPR002678;IPR036069;IPR018819;	A0A1R0H439		Smittium mucronatum	Protein NIF3-like protein	AYI68_g1946	duplicate	UniProt Fam - pfam/interpro;InterPro exported;	NA	NA
Sensor histidine kinase inhibitor	KipI family with carboxyltransferase/allophanate hydrolase subunit domain	Pfam exported	Invalid	NIF3, CT_C_D, CT_A_B	PF02626;PF02682;PF01784;	IPR003778;IPR003833;IPR029000;IPR002678;IPR036069;IPR010016;	A0A0A2VUI6		Beauveria bassiana D1-5	Uncharacterized protein ybgK	BBAD15_g2974	duplicate	UniProt Fam - pfam/interpro;InterPro exported;	NA	NA
NUDIX hydrolase	ADP-ribose pyrophosphatase (ADPRase) (cd03424)	Pfam exported	Valid, conditional	NIF3, NUDIX	PF01784;PF00293;	IPR002678;IPR036069;IPR020476;IPR015797;IPR020084;IPR000086;	A0A087E9N5		Bifidobacterium subtile	PadR family transcriptional regulator, EC 3.6.1.13	BISU_0493	duplicate	UniProt Fam - pfam/interpro;InterPro exported;	NA	NA
CIAO1/Cia1	x6 WD40 repeat (pfam)	Pfam exported	Valid	WD40 x 6, NIF3	PF01784;PF00400;	IPR028608;IPR002678;IPR036069;IPR015943;IPR001680;IPR019775;IPR017986;IPR036322;	A0A0L7LPT1		Operophtera brumata	Probable cytosolic iron-sulfur protein assembly protein Ciao1	Ciao1 OBRU01_03987	duplicate	UniProt Fam - pfam/interpro;InterPro exported;	NA	NA
Alpha-D-phosphohexomutase	Alpha-D-phosphohexomutase, alpha/beta/alpha domain I	Pfam exported	Invalid	PGM_PMM_I, NIF3	PF01784;PF02878;	IPR005844;IPR016055;IPR002678;IPR036069;	A0A1A9X722		Glossina fuscipes fuscipes	PGM_PMM_I domain-containing protein	GfusI1:JFJR01012816.1	duplicate	UniProt Fam - pfam/interpro;InterPro exported;	NA	NA
Uncategorized/Singleton	with EF-hand domain pair	Pfam exported	Invalid	EF-hand_7, EF-hand_8, NIF3	PF13499;PF13833;PF01784;	IPR011992;IPR018247;IPR002048;IPR002678;IPR036069;	A0A498N151		Labeo rohita	NIF3 1	ROHU_006714	duplicate	UniProt Fam - pfam/interpro;InterPro exported;	NA	NA
Tyrosine phosphatase	DSPc﻿	Pfam exported	Valid, conditional	DSPc, NIF3	PF00782;PF01784;	IPR000340;IPR002678;IPR036069;IPR029021;IPR016130;IPR000387;IPR020422;	A0A367XR54		Candida viswanathii	NGG1-interacting factor 3	NIF3 Cantr_05866	duplicate	UniProt Fam - pfam/interpro;InterPro exported;	NA	NA
FAD-/NAD-binding	UCP036654; with transcription factor domain	Pfam exported	Valid, conditional	Fungal_trans, FAD_binding_2 x 2	PF00890;PF04082;PF01784;	IPR003953;IPR036188;IPR002678;IPR036069;IPR027477;IPR007219;IPR014614;	A0A1S9D5J2		Aspergillus oryzae	Fumarate reductase/succinate dehydrogenase flavoprotein domain protein	OAory_01052200	duplicate	UniProt Fam - pfam/interpro;InterPro exported;	NA	NA
Methyltransferase	SAM-dependent methyltransferase; tRNA methyltransferase, TrmK	Pfam exported	Valid, conditional	TrmK, NIF3	PF01784;PF04816;	IPR002678;IPR036069;IPR029063;IPR006901;	A0A1H8ZHI3		Ignavigranum ruoffiae	GTP cyclohydrolase 1 type 2 homolog	SAMN04488558_101250	duplicate	UniProt Fam - pfam/interpro;InterPro exported;	NA	NA
FAD-/NAD-binding	Short-chain dehydrogenase/reductase SDR	Pfam exported	Invalid	NIF3, adh_short	PF00106;PF01784;	IPR002678;IPR036069;IPR036291;IPR002347;	V5FCQ5		Byssochlamys spectabilis (strain No. 5 / NBRC 109023)	NGG1 interacting factor Nif3, putative	PVAR5_3453	duplicate	UniProt Fam - pfam/interpro;InterPro exported;	NA	NA
Heterokaryon incompatibility protein (HET)		Pfam exported	Invalid	NIF3, HET	PF06985;PF01784;	IPR002678;IPR036069;IPR010730;	A0A1V8V835		Rachicladosporium sp. CCFEE 5018	HET domain-containing protein	B0A51_00665	duplicate	UniProt Fam - pfam/interpro;InterPro exported;	NA	NA
CIAO1/Cia1	x3 WD40 repeat (pfam)	Pfam exported	Valid, conditional	WD40 x 3, NIF3	PF01784;PF00400;	IPR002678;IPR036069;IPR015943;IPR001680;IPR019775;IPR017986;IPR036322;	A0A067R4D1		Zootermopsis nevadensis	NIF3-like protein 1	L798_07717	duplicate	UniProt Fam - pfam/interpro;UniProt Fam - pfam/interpro;InterPro exported;	NA	NA
Zinc finger	RING type; C4-type zinc ribbon domain; phospholipase C-beta-2-related	Pfam exported	Valid	NIF3, zf-RING_7	PF01784;PF02591;	IPR002678;IPR036069;IPR003743;	Q7MQP7		Wolinella succinogenes (strain ATCC 29543 / DSM 1740 / LMG 7466 / NCTC 11488 / FDC 602W)	zf-RING_7 domain-containing protein	WS2117	duplicate	UniProt Fam - pfam/interpro;InterPro exported;	NA	NA

## Sheet: b
Fusion Class	Fusion Note/Fusion Subclass	Source Method	Validation Status	Exported Identifiers	Pfam(s)	InterPro ID(s)	Member Sequence(s)	GenBank CDS/RefSeq	Superkingdom	Organism	Protein names	Gene names	Fusion COG/Pfam/CDD Clan/InterPro	Fusion Domain Description(s)	COG(s), all [EggNOG]
RNase H		Literature Review/Data Capture	Invalid	NA	PF01784;PF13456;	IPR002678;IPR036069;IPR015867;IPR012337;﻿IPR002156;IPR036397;	A0A523BTI2	TDA65818.1	Bacteria	Clostridia bacterium	GTP cyclohydrolase 1 type 2 homolog	D9V47_11990	NA	NA	COG3323;COG0327;COG0328;COG3341;
NUDIX hydrolase	NUDIX hydrolase domain	Literature Review/Data Capture	Valid	NA	PF00293;	IPR036069;IPR003562;IPR015867;IPR015797;IPR020084;IPR000086;	Q8R6E6	AAL93890.1	Bacteria	Fusobacterium nucleatum subsp. nucleatum (strain ATCC 25586 / DSM 15643 / BCRC 10681 / CIP 101130 / JCM 8532 / KCTC 2640 / LMG 13131 / VPI 4355)	Mutator MutT protein	FN1791	COG0494	NUDIX, 8-oxo-dGTP pyrophosphatase MutT and related house-cleaning NTP pyrophosphohydrolases	COG3323;COG1051;COG0494;COG2816;
CIAO1/Cia1	WD40 repeat	UniProt Fam - pfam/interpro	Valid	NA	PF01784;PF00400;	IPR002678;IPR036069;IPR015943;IPR001680;IPR019775;IPR017986;IPR036322;	A0A067R4D1	KDR18041.1	Eukaryota	Zootermopsis nevadensis	NIF3-like protein 1	L798_07717	COG2319	Anaphase-promoting complex binding; WD40 repeat (TIR domain) (COG4916); PhnCDE component (COG3638)	COG0327;COG3323;COG2319;COG4916;COG3638;
CIAO1/Cia1	WD40 repeat	UniProt Fam - pfam/interpro	Valid	NA	PF01784;PF00400;	IPR028608;IPR002678;IPR036069;IPR015943;IPR001680;IPR019775;IPR017986;IPR036322;	A0A151JYK8	KYN40944.1	Eukaryota	Trachymyrmex septentrionalis	Probable cytosolic iron-sulfur protein assembly protein Ciao1	Ciao1 ALC56_04640	COG2319	Anaphase-promoting complex binding; WD40 repeat (TIR domain) (COG4916); PhnCDE component (COG3638)	COG2319;COG0327;COG3323;COG4916;COG3638;
CIAO1/Cia1	WD40 repeat	UniProt Fam - pfam/interpro	Valid	NA	PF01784;PF00400;	IPR028608;IPR002678;IPR036069;IPR015943;IPR001680;IPR019775;IPR017986;IPR036322;	A0A0L7LPT1	KOB77528.1	Eukaryota	Operophtera brumata	Probable cytosolic iron-sulfur protein assembly protein Ciao1	Ciao1 OBRU01_03987	COG2319	Anaphase-promoting complex binding; WD40 repeat (TIR domain) (COG4916); PhnCDE component (COG3638)	COG2319;COG4916;COG0327;COG3638;COG4946;COG3323;
CIAO1/Cia1	WD40 repeat	UniProt Fam - pfam/interpro	Valid	NA	PF01784;PF00400;	IPR028608;IPR002678;IPR036069;IPR015943;IPR001680;IPR019775;IPR017986;IPR036322;	A0A195BDN2	KYM82290.1	Eukaryota	Atta colombica	Probable cytosolic iron-sulfur protein assembly protein Ciao1	Ciao1 ALC53_07293	COG2319	Anaphase-promoting complex binding; WD40 repeat (TIR domain) (COG4916); PhnCDE component (COG3638)	COG2319;COG0327;COG3323;COG4916;COG3638;
CIAO1/Cia1	WD40 repeat	UniProt Fam - pfam/interpro	Valid	NA	PF01784;PF00400;	IPR028608;IPR002678;IPR036069;IPR015943;IPR001680;IPR019775;IPR017986;IPR036322;	A0A139WBU3	KYB25409.1	Eukaryota	Tribolium castaneum	Probable cytosolic iron-sulfur protein assembly protein Ciao1	Ciao1 TcasGA2_TC031250	COG2319	Anaphase-promoting complex binding; WD40 repeat (TIR domain) (COG4916); PhnCDE component (COG3638)	COG2319;COG0327;COG3323;COG4916;COG3638;COG1162;COG4946;
CIAO1/Cia1	WD40 repeat	UniProt Fam - pfam/interpro	Valid	NA	PF01784;PF00400;	IPR028608;IPR002678;IPR036069;IPR015943;IPR001680;IPR019775;IPR017986;IPR036322;	E9IGK1	EFZ20289.1	Eukaryota	Solenopsis invicta	WD	SINV_00781	COG2319	Anaphase-promoting complex binding; WD40 repeat (TIR domain) (COG4916); serine-type peptidase activity (COG4946)	COG2319;COG0327;COG3323;COG4916;COG4946;
CIAO1/Cia1	WD40 repeat	UniProt Fam - pfam/interpro	Valid	NA	PF01784;PF00400;	IPR028608;IPR020472;IPR002678;IPR036069;IPR015943;IPR001680;IPR019775;IPR017986;IPR036322;	A0A6G0TSX2	KAE9538145.1	Eukaryota	Aphis glycines	Probable cytosolic iron-sulfur protein assembly protein Ciao1	Ciao1 AGLY_006117	COG2319	Anaphase-promoting complex binding; WD40 repeat (TIR domain) (COG4916)	COG2319;COG0327;COG3323;COG4916;
CIAO1/Cia1	WD40 repeat	UniProt Fam - pfam/interpro	Valid	NA	PF01784;PF00400;	IPR028608;IPR002678;IPR036069;IPR015943;IPR001680;IPR019775;IPR017986;IPR036322;	A0A0N7Z9M2	JAI56440.1	Eukaryota	Rhodnius neglectus	Probable cytosolic iron-sulfur protein assembly protein Ciao1	JAI56440.1	COG2319	Anaphase-promoting complex binding; WD40 repeat (TIR domain) (COG4916)	COG2319;COG0327;COG3323;COG4916;
CIAO1/Cia1	WD40 repeat	UniProt Fam - pfam/interpro	Valid	NA	PF01784;PF00400;	IPR028608;IPR020472;IPR002678;IPR036069;IPR015943;IPR001680;IPR019775;IPR017986;IPR036322;	A0A3L8DRM5	RLU23051.1	Eukaryota	Ooceraea biroi	Probable cytosolic iron-sulfur protein assembly protein Ciao1	Ciao1 DMN91_005329	COG2319	Anaphase-promoting complex binding; WD40 repeat (TIR domain) (COG4916)	COG2319;COG0327;COG3323;COG4916;
CIAO1/Cia1	WD40 repeat	UniProt Fam - pfam/interpro	Valid	NA	PF01784;PF00400;	IPR028608;IPR002678;IPR036069;IPR015943;IPR001680;IPR019775;IPR017986;IPR036322;	A0A232F013	OXU23758.1	Eukaryota	Trichomalopsis sarcophagae	WD	TSAR_007269	COG2319	Anaphase-promoting complex binding; WD40 repeat (TIR domain) (COG4916); PhnCDE component (COG3638)	COG2319;COG0327;COG3323;COG4916;COG4946;COG3638;
CIAO1/Cia1	WD40 repeat	UniProt Fam - pfam/interpro	Valid	NA	PF01784;PF00400;	IPR028608;IPR002678;IPR036069;IPR015943;IPR001680;IPR019775;IPR017986;IPR036322;	A0A4S2KYR3	TGZ55221.1	Eukaryota	Temnothorax longispinosus	Putative cytosolic iron-sulfur protein assembly protein Ciao1 (Fragment)	DBV15_05086	COG2319	Anaphase-promoting complex binding; WD40 repeat (TIR domain) (COG4916)	COG2319;COG0327;COG3323;COG4916;
CIAO1/Cia1	WD40 repeat	UniProt Fam - pfam/interpro	Valid	NA	PF01784;PF00400;	IPR028608;IPR002678;IPR036069;IPR015943;IPR001680;IPR019775;IPR017986;IPR036322;	A0A6V7GMX5	CAD0391481.1	Eukaryota	Cotesia congregata	Probable cytosolic iron-sulfur protein assembly protein Ciao1	Ciao1 CCMSTLAB_LOCUS12147	COG2319	Anaphase-promoting complex binding; WD40 repeat (TIR domain) (COG4916); PhnCDE component (COG3638)	COG2319;COG0327;COG3323;COG4916;COG3638;
Acetyltransferase	Histone acetyltransferase	UniProt Fam - pfam/interpro	Valid	NA	PF01853;PF01784;PF11717;PF17772;	IPR016181;IPR016197;IPR002678;IPR036069;IPR002717;IPR037906;IPR025995;IPR036388;IPR040706;	A0A182JW27	KB703659.1	Eukaryota	Anopheles christyi	Histone acetyltransferase (EC 2.3.1.48)	AchrA1:KB703659.1	COG5027	Histone acetyltransferase (MYST family)	COG0327;COG3323;
Acetyltransferase	Histone acetyltransferase	UniProt Fam - pfam/interpro	Valid	NA	PF01853;PF01784;PF11717;PF17772;	IPR016181;IPR016197;IPR002678;IPR036069;IPR002717;IPR037906;IPR025995;IPR036388;IPR040706;	A0A182W9B5	KB663677.1	Eukaryota	Anopheles minimus	Histone acetyltransferase (EC 2.3.1.48)	AminM1:KB663677.1	COG5027	Histone acetyltransferase (MYST family)	COG0327;COG3323;
Acetyltransferase	Histone acetyltransferase	UniProt Fam - pfam/interpro	Valid	NA	PF01853;PF01784;PF11717;PF17772;	IPR016181;IPR016197;IPR002678;IPR036069;IPR002717;IPR037906;IPR025995;IPR036388;IPR040706;	A0A182WZB9	KB665599.1	Eukaryota	Anopheles quadriannulatus	Histone acetyltransferase (EC 2.3.1.48)	AquaS1:KB665599.1	COG5027	Histone acetyltransferase (MYST family)	COG0327;COG3323;
Acetyltransferase	GNAT family N-acetyltransferase	UniProt Fam - pfam/interpro	Invalid	NA	PF00583;PF01784;	IPR016181;IPR000182;IPR002678;IPR036069;	A0A7C5ASG6	HGZ17905.1	Bacteria	Chloroflexi bacterium	GNAT family N-acetyltransferase	ENW85_02355	NA	NA	COG0327;COG3393;COG1247;COG4552;COG1246;
Acetyltransferase	GNAT family N-acetyltransferase	UniProt Fam - pfam/interpro	Invalid	NA	PF00583;PF01784;	IPR016181;IPR000182;IPR002678;IPR036069;	A0A7C3R0U3	HFU31474.1	Bacteria	Chloroflexi bacterium	GNAT family N-acetyltransferase	ENY06_15340	NA	NA	COG0327;COG3393;COG3323;COG1246;COG0454;COG1247;COG4552;COG3153;
Acetyltransferase	GNAT family N-acetyltransferase	UniProt Fam - pfam/interpro	Invalid	NA	PF00583;PF01784;	IPR016181;IPR000182;IPR002678;IPR036069;	A0A7C6TES9	HHX43382.1	Bacteria	Chloroflexi bacterium	GNAT family N-acetyltransferase	GX714_05255	NA	NA	COG0327;COG3393;COG1246;COG4552;COG1247;COG3323;COG0454;COG2153;
Pterin-binding		UniProt Fam - pfam/interpro	Invalid	NA	PF01784;	IPR002678;IPR036069;IPR000489;	A0A1I2JED0	SFF53212.1	Bacteria	Clostridium cadaveris	GTP cyclohydrolase 1 type 2 homolog	DBY38_12830 SAMN04487885_1025	NA	NA	COG0327;COG3323;
Pterin-binding		UniProt Fam - pfam/interpro	Invalid	NA	PF01784;	IPR002678;IPR036069;IPR000489;	A0A151BI26	KYH39498.1	Archaea	Candidatus Bathyarchaeota archaeon B26-2	NGG1p interacting factor 3	AYL32_015970	NA	NA	COG0327;COG3323;
FAD-/NAD-binding	UCP036654; FAD binding domain-containing flavoprotein	UniProt Fam - pfam/interpro	Valid	NA	PF00890;PF01784;	IPR003953;IPR036188;IPR002678;IPR036069;IPR027477;IPR014614;	A0A5N6H8H9	KAB8250528.1	Eukaryota	Aspergillus flavus	FAD binding domain-containing protein	BDV35DRAFT_377281	COG3573	steroid biosynthetic process; succinate dehydrogenase (COG1053); tRNA (5-methylaminomethyl-2-thiouridylate)-methyltransferase activity (COG0665); protoporphyrinogen oxidase activity (COG1232)	COG3573;COG0327;COG3323;COG1053;COG0665;COG0029;COG1232;COG0644;COG3976;COG0654;COG1231;COG0492;COG3349;COG1635;COG1206;
FAD-/NAD-binding	UCP036654; FAD binding domain-containing flavoprotein	UniProt Fam - pfam/interpro	Valid	NA	PF00890;PF01784;	IPR003953;IPR036188;IPR002678;IPR036069;IPR014614;	A0A5N6YEJ2	KAE8343874.1	Eukaryota	Aspergillus arachidicola	FAD	BDV24DRAFT_149442	COG3573	steroid biosynthetic process; succinate dehydrogenase (COG1053); tRNA (5-methylaminomethyl-2-thiouridylate)-methyltransferase activity (COG0665); protoporphyrinogen oxidase activity (COG1232)	COG3573;COG0327;COG1053;COG3323;COG0665;COG0029;COG0644;COG1232;COG1231;COG3976;COG0654;COG3349;COG0492;COG1635;COG1206;COG2906;COG3075;
FAD-/NAD-binding	UCP036654; FAD binding domain-containing flavoprotein	UniProt Fam - pfam/interpro	Valid	NA	PF00890;PF01784;	IPR003953;IPR036188;IPR002678;IPR036069;IPR027477;IPR014614;	A0A5N7A682	KAE8365342.1	Eukaryota	Aspergillus caelatus	FAD binding domain-containing protein	BDV27DRAFT_144570	COG3573	steroid biosynthetic process; succinate dehydrogenase (COG1053); tRNA (5-methylaminomethyl-2-thiouridylate)-methyltransferase activity (COG0665); protoporphyrinogen oxidase activity (COG1232)	COG3573;COG0327;COG3323;COG1053;COG0029;COG0665;COG3976;COG1232;COG0644;COG0492;COG0654;COG1231;COG3349;COG1635;COG2509;
FAD-/NAD-binding	UCP036654; FAD binding domain-containing flavoprotein	UniProt Fam - pfam/interpro	Valid	NA	PF00890;PF01784;	IPR003953;IPR036188;IPR002678;IPR036069;IPR027477;IPR014614;	A0A5N6IWR4	KAB8271121.1	Eukaryota	Aspergillus minisclerotigenes	FAD binding domain-containing protein	BDV30DRAFT_228336	COG3573	steroid biosynthetic process; succinate dehydrogenase (COG1053); tRNA (5-methylaminomethyl-2-thiouridylate)-methyltransferase activity (COG0665); protoporphyrinogen oxidase activity (COG1232)	COG3573;COG0327;COG3323;COG1053;COG0665;COG0029;COG1232;COG0644;COG0492;COG0654;COG3349;COG1231;COG3976;COG1635;COG1206;COG2509;
FAD-/NAD-binding	UCP036654; FAD binding domain-containing flavoprotein	UniProt Fam - pfam/interpro	Valid	NA	PF00890;PF01784;	IPR003953;IPR036188;IPR002678;IPR036069;IPR027477;IPR014614;	A0A5N6DQ14	KAB8207241.1	Eukaryota	Aspergillus parasiticus	FAD binding domain-containing protein	BDV34DRAFT_211822	COG3573	steroid biosynthetic process; succinate dehydrogenase (COG1053); tRNA (5-methylaminomethyl-2-thiouridylate)-methyltransferase activity (COG0665); protoporphyrinogen oxidase activity (COG1232)	COG3573;COG0327;COG3323;COG1053;COG0029;COG0665;COG1232;COG3976;COG0644;COG0492;COG0654;COG3349;COG1231;COG1635;COG1233;COG1206;
FAD-/NAD-binding	UCP036654; FAD binding domain-containing flavoprotein	UniProt Fam - pfam/interpro	Valid	NA	PF00890;PF01784;	IPR003953;IPR036188;IPR002678;IPR036069;IPR014614;	A0A5N6V5R0	KAE8166133.1	Eukaryota	Aspergillus tamarii	GTP cyclohydrolase 1 type 2/Nif3	BDV40DRAFT_285789	COG3573	steroid biosynthetic process; succinate dehydrogenase (COG1053); tRNA (5-methylaminomethyl-2-thiouridylate)-methyltransferase activity (COG0665); protoporphyrinogen oxidase activity (COG1232)	COG3573;COG0327;COG1053;COG3323;COG0029;COG0665;COG1232;COG0644;COG0654;COG3976;COG0492;COG1231;COG1635;COG3349;COG0446;COG2509;COG1233;
FAD-/NAD-binding	UCP036654; FAD binding domain-containing flavoprotein	UniProt Fam - pfam/interpro	Valid	NA	PF00890;PF01784;	IPR003953;IPR036188;IPR002678;IPR036069;IPR027477;IPR014614;	A0A5N7DQG0	KAE8408279.1	Eukaryota	Aspergillus pseudonomius	GTP cyclohydrolase 1 type 2/Nif3	BDV37DRAFT_296464	COG3573	steroid biosynthetic process; succinate dehydrogenase (COG1053); tRNA (5-methylaminomethyl-2-thiouridylate)-methyltransferase activity (COG0665); protoporphyrinogen oxidase activity (COG1232)	COG3573;COG0327;COG3323;COG1053;COG0665;COG0029;COG1232;COG0644;COG3349;COG0654;COG0492;COG1231;COG3976;COG1635;COG1206;
FAD-/NAD-binding	UCP036654; FAD binding domain-containing flavoprotein	UniProt Fam - pfam/interpro	Valid	NA	PF00890;PF01784;	IPR003953;IPR036188;IPR002678;IPR036069;IPR014614;	A0A5N6F509	KAB8224747.1	Eukaryota	Aspergillus novoparasiticus	FAD binding domain-containing protein	BDV33DRAFT_233137	COG3573	steroid biosynthetic process; succinate dehydrogenase (COG1053); tRNA (5-methylaminomethyl-2-thiouridylate)-methyltransferase activity (COG0665); protoporphyrinogen oxidase activity (COG1232)	COG3573;COG0327;COG3323;COG1053;COG0665;COG0029;COG1232;COG0644;COG3976;COG0654;COG0492;COG3349;COG1231;COG1635;
FAD-/NAD-binding	UCP036654; FAD binding domain-containing flavoprotein	UniProt Fam - pfam/interpro	Valid	NA	PF00890;PF01784;	IPR003953;IPR036188;IPR002678;IPR036069;IPR027477;IPR014614;	A0A5N6VPU0	KAE8310206.1	Eukaryota	Aspergillus transmontanensis	FAD binding domain-containing protein	BDV41DRAFT_566708	COG3573	steroid biosynthetic process; succinate dehydrogenase (COG1053); tRNA (5-methylaminomethyl-2-thiouridylate)-methyltransferase activity (COG0665); protoporphyrinogen oxidase activity (COG1232)	COG3573;COG0327;COG3323;COG1053;COG0029;COG0665;COG0644;COG1232;COG3976;COG0492;COG0654;COG1635;COG1231;COG3349;
FAD-/NAD-binding	UCP036654; FAD binding domain-containing flavoprotein	UniProt Fam - pfam/interpro	Valid	NA	PF00890;PF01784;	IPR003953;IPR036188;IPR002678;IPR036069;IPR014614;	A0A5N7DZX5	KAE8411905.1	Eukaryota	Aspergillus pseudocaelatus	FAD binding domain-containing protein	BDV36DRAFT_288317	COG3573	steroid biosynthetic process; succinate dehydrogenase (COG1053); tRNA (5-methylaminomethyl-2-thiouridylate)-methyltransferase activity (COG0665); protoporphyrinogen oxidase activity (COG1232)	COG3573;COG0327;COG3323;COG1053;COG0029;COG0665;COG1232;COG0644;COG1232;COG0644;COG3976;COG0492;COG0654;COG1231;COG3349;COG1635;COG2509;
FAD-/NAD-binding	UCP036654; FAD binding domain-containing flavoprotein	UniProt Fam - pfam/interpro	Valid	NA	PF00890;PF01784;	IPR003953;IPR036188;IPR002678;IPR036069;IPR027477;IPR014614;	A0A5N6HY31	KAB8259355.1	Eukaryota	Aspergillus pseudonomius	GTP cyclohydrolase 1 type 2/Nif3	BDV32DRAFT_138898	COG3573	steroid biosynthetic process; succinate dehydrogenase (COG1053); tRNA (5-methylaminomethyl-2-thiouridylate)-methyltransferase activity (COG0665); protoporphyrinogen oxidase activity (COG1232)	COG3573;COG0327;COG3323;COG1053;COG0665;COG0029;COG1232;COG0644;COG0654;COG0492;COG3349;COG3976;COG1231;COG1635;COG1206;
FAD-/NAD-binding	UCP036654; FAD binding domain-containing flavoprotein	UniProt Fam - pfam/interpro	Valid	NA	PF00890;PF01784;	IPR003953;IPR036188;IPR002678;IPR036069;IPR027477;IPR014614;	A0A0F0I4C6	KJK62580.1	Eukaryota	Aspergillus parasiticus	NIF3 NGG1p interacting factor 3	P875_00095268	COG3573	steroid biosynthetic process; succinate dehydrogenase (COG1053); tRNA (5-methylaminomethyl-2-thiouridylate)-methyltransferase activity (COG0665); protoporphyrinogen oxidase activity (COG1232)	COG3573;COG0327;COG3323;COG1053;COG0029;COG0665;COG1232;COG3976;COG0644;COG0654;COG3349;COG0492;COG1635;
FAD-/NAD-binding	UCP036654; FAD binding domain-containing flavoprotein	UniProt Fam - pfam/interpro	Valid	NA	PF00890;PF01784;	IPR003953;IPR036188;IPR002678;IPR036069;IPR014614;	A0A5N6XDM1	KAE8331341.1	Eukaryota	Aspergillus sergii	FAD binding domain-containing protein	BDV39DRAFT_218683	COG3573	steroid biosynthetic process; succinate dehydrogenase (COG1053); tRNA (5-methylaminomethyl-2-thiouridylate)-methyltransferase activity (COG0665); protoporphyrinogen oxidase activity (COG1232)	COG3573;COG0327;COG3323;COG1053;COG0029;COG0665;COG3976;COG1232;COG0644;COG0492;COG0654;COG3349;COG1231;COG1635;
TAT signal		UniProt Fam - pfam/interpro	Invalid	NA	PF01784;	IPR002678;IPR036069;IPR006311;	A0A6L7YT22	MYE63207.1	Bacteria	Rhodothermaceae bacterium	NGG1p interacting factor NIF3	F4X29_07900	NA	NA	COG0327;COG3323;
TAT signal		UniProt Fam - pfam/interpro	Valid	NA	PF01784;	IPR002678;IPR036069;IPR006311;	A0A6G9AI40	QIP11976.1	Bacteria	Spirosoma sp. BT328	NGG1p interacting factor NIF3	G8759_04680	IPR006311	Twin-arginine translocation pathway, signal sequence	COG0327;COG3323;
TAT signal		UniProt Fam - pfam/interpro	Valid	NA	PF01784;	IPR002678;IPR036069;IPR006311;	A0A6G9AI74	QIP12150.1	Bacteria	Spirosoma sp. BT328	Uncharacterized protein	G8759_05640	IPR006311	Twin-arginine translocation pathway, signal sequence	COG0327;COG3323;
TAT signal		UniProt Fam - pfam/interpro	Valid	NA	PF01784;	IPR002678;IPR036069;IPR006311;	A0A6P1W9J2	QHW01073.1	Bacteria	Spirosoma sp. I-24	NGG1p interacting factor NIF3	GJR95_41275	IPR006311	Twin-arginine translocation pathway, signal sequence	COG0327;COG3323;
TAT signal		UniProt Fam - pfam/interpro	Valid	NA	PF01784;	IPR002678;IPR036069;IPR006311;	A0A6P1VTA4	QHV95220.1	Bacteria	Spirosoma sp. I-24	Uncharacterized protein	GJR95_09440	IPR006311	Twin-arginine translocation pathway, signal sequence	COG0327;COG3323;
TAT signal		UniProt Fam - pfam/interpro	Invalid	NA	PF01784;	IPR002678;IPR036069;IPR006311;	A0A1F5YGI6	OGF99243.1	Bacteria	Candidatus Glassbacteria bacterium GWA2	Uncharacterized protein	A2Z86_12335	NA	NA	COG0327;
TAT signal		UniProt Fam - pfam/interpro	Valid	NA	PF01784;	IPR002678;IPR036069;IPR006311;	A0A4R6T5A0	TDQ14680.1	Bacteria	Algoriphagus boseongensis	Putative NIF3 family GTP cyclohydrolase 1 type 2	DFQ04_3270	IPR006311	Twin-arginine translocation pathway, signal sequence	COG0327;COG3323;
TAT signal		UniProt Fam - pfam/interpro	Invalid	NA	PF01784;	IPR002678;IPR036069;IPR006311;	A0A6L8CAG2	MYG44830.1	Bacteria	Rhodothermaceae bacterium	NGG1p interacting factor NIF3	F4159_06880	NA	NA	COG0327;COG3323;
TAT signal		UniProt Fam - pfam/interpro	Valid	NA	PF01784;	IPR002678;IPR036069;IPR006311;	A0A1T4MH81	SJZ66211.1	Bacteria	Chitinophaga eiseniae	Putative GTP cyclohydrolase 1 type 2, NIF3 family	SAMN04488128_1011111	IPR006311	Twin-arginine translocation pathway, signal sequence	COG0327;COG3323;
TAT signal		UniProt Fam - pfam/interpro	Valid	NA	PF01784;	IPR002678;IPR036069;IPR006311;	A0A1G6XWC5	SDD82420.1	Bacteria	Dyadobacter soli	Putative GTP cyclohydrolase 1 type 2, NIF3 family	SAMN04487996_102279	IPR006311	Twin-arginine translocation pathway, signal sequence	COG0327;COG3323;
TAT signal		UniProt Fam - pfam/interpro	Valid	NA	PF01784;	IPR002678;IPR036069;IPR006311;	C7PFT1	ACU63493.1	Bacteria	Chitinophaga pinensis	Uncharacterized protein	Cpin_6084	IPR006311	Twin-arginine translocation pathway, signal sequence	COG0327;COG3323;
TAT signal		UniProt Fam - pfam/interpro	Valid	NA	PF01784;	IPR002678;IPR036069;IPR006311;	A0A1H8LLP4	SEO05698.1	Bacteria	Mucilaginibacter gossypiicola	Putative GTP cyclohydrolase 1 type 2, NIF3 family	SAMN05192574_105139	IPR006311	Twin-arginine translocation pathway, signal sequence	COG0327;COG3323;
TAT signal		UniProt Fam - pfam/interpro	Valid	NA	PF01784;	IPR002678;IPR036069;IPR006311;	A0A1G7S7F2	SDG18100.1	Bacteria	Chitinophaga filiformis	Putative GTP cyclohydrolase 1 type 2, NIF3 family	SAMN04488121_103738	IPR006311	Twin-arginine translocation pathway, signal sequence	COG0327;COG3323;
TAT signal		UniProt Fam - pfam/interpro	Valid	NA	PF01784;	IPR002678;IPR036069;IPR006311;	A0A1H7V0N0	SEM02696.1	Bacteria	Chitinophaga rupis	Putative GTP cyclohydrolase 1 type 2, NIF3 family	SAMN04488505_103173	IPR006311	Twin-arginine translocation pathway, signal sequence	COG0327;COG3323;
TAT signal		UniProt Fam - pfam/interpro	Valid	NA	PF01784;	IPR002678;IPR036069;IPR006311;	A0A385SRC0	AYB33402.1	Bacteria	Chryseolinea soli	NGG1p interacting factor NIF3	D4L85_23675	IPR006311	Twin-arginine translocation pathway, signal sequence	COG0327;COG3323;
TAT signal		UniProt Fam - pfam/interpro	Valid	NA	PF01784;	IPR002678;IPR036069;IPR006311;IPR019546;	A0A3E1NP16	RFM29663.1	Bacteria	Deminuibacter soli	Uncharacterized protein	DXN05_01385	IPR006311	Twin-arginine translocation pathway, signal sequence	COG0327;COG3323;
TAT signal		UniProt Fam - pfam/interpro	Valid	NA	PF01784;	IPR002678;IPR036069;IPR006311;	A0A372NQD0	RFZ90860.1	Bacteria	Mucilaginibacter sp. MYSH2	Uncharacterized protein	D0C36_18085	IPR006311	Twin-arginine translocation pathway, signal sequence	COG0327;COG3323;
TAT signal		UniProt Fam - pfam/interpro	Valid	NA	PF01784;	IPR002678;IPR036069;IPR006311;	A0A2W7RIP2	PZX60264.1	Bacteria	Algoriphagus ratkowskyi	Putative NIF3 family GTP cyclohydrolase 1 type 2	LV84_00536	IPR006311	Twin-arginine translocation pathway, signal sequence	COG0327;COG3323;
TAT signal		UniProt Fam - pfam/interpro	Valid	NA	PF01784;	IPR002678;IPR036069;IPR006311;	A0A1Q6A399	OKS88478.1	Bacteria	Mucilaginibacter polytrichastri	Uncharacterized protein	RG47T_3945	IPR006311	Twin-arginine translocation pathway, signal sequence	COG0327;COG3323;
TAT signal		UniProt Fam - pfam/interpro	Valid	NA	PF01784;	IPR002678;IPR036069;IPR006311;	A0A1M5JJA3	SHG40611.1	Bacteria	Chryseolinea serpens	Putative GTP cyclohydrolase 1 type 2, NIF3 family	SAMN04488109_0096	IPR006311	Twin-arginine translocation pathway, signal sequence	COG0327;COG3323;
TAT signal		UniProt Fam - pfam/interpro	Valid	NA	PF01784;	IPR002678;IPR036069;IPR006311;	A0A4Q2UKI2	RYC68005.1	Bacteria	Spirosoma sordidisoli	NGG1p interacting factor NIF3	EQG79_21355	IPR006311	Twin-arginine translocation pathway, signal sequence	COG0327;COG3323;
TAT signal		UniProt Fam - pfam/interpro	Valid	NA	PF01784;	IPR002678;IPR036069;IPR006311;	A0A1H8RCW6	SEO64107.1	Bacteria	Mucilaginibacter sp. OK283	Putative GTP cyclohydrolase 1 type 2, NIF3 family	SAMN05428947_103233	IPR006311	Twin-arginine translocation pathway, signal sequence	COG0327;COG3323;
TAT signal		UniProt Fam - pfam/interpro	Valid	NA	PF01784;	IPR002678;IPR036069;IPR006311;	I3ZKN1	AFL89799.1	Bacteria	Terriglobus roseus (strain DSM 18391 / NRRL B-41598 / KBS 63)	Uncharacterized protein	Terro_3585	IPR006311	Twin-arginine translocation pathway, signal sequence	COG0327;COG3323;
TAT signal		UniProt Fam - pfam/interpro	Valid	NA	PF01784;	IPR002678;IPR036069;IPR006311;	A0A369Q9C6	RDC61493.1	Bacteria	Adhaeribacter pallidiroseus	Uncharacterized protein	AHMF7616_00072	IPR006311	Twin-arginine translocation pathway, signal sequence	COG0327;COG3323;
TAT signal		UniProt Fam - pfam/interpro	Invalid	NA	PF01784;	IPR002678;IPR036069;IPR006311;	A0A3D4P3N1	HCS49188.1	Bacteria	Candidatus Aminicenantes bacterium	Uncharacterized protein	DIW61_13415	NA	NA	COG0327;COG3323;
TAT signal		UniProt Fam - pfam/interpro	Valid	NA	PF01784;	IPR002678;IPR036069;IPR006311;	A0A316H9T0	PWK77939.1	Bacteria	Mucilaginibacter oryzae	Putative NIF3 family GTP cyclohydrolase 1 type 2	LX99_02824	IPR006311	Twin-arginine translocation pathway, signal sequence	COG0327;COG3323;
TAT signal		UniProt Fam - pfam/interpro	Valid	NA	PF01784;	IPR002678;IPR036069;IPR006311;	A0A5B8V0H9	QEC64739.1	Bacteria	Mucilaginibacter ginsenosidivorans	NGG1p interacting factor NIF3	FRZ54_19950	IPR006311	Twin-arginine translocation pathway, signal sequence	COG0327;COG3323;
TAT signal		UniProt Fam - pfam/interpro	Valid	NA	PF01784;	IPR002678;IPR036069;IPR006311;IPR019546;	A0A5E7XYB9	VVS99181.1	Bacteria	Imperialibacter sp. EC-SDR9	NGG1p interacting factor NIF3	IMPR6_100051	IPR006311	Twin-arginine translocation pathway, signal sequence	COG0327;COG3323;
TAT signal		UniProt Fam - pfam/interpro	Valid	NA	PF01784;	IPR002678;IPR036069;IPR006311;	W6TJ81	ETZ19222.1	Bacteria	Pedobacter sp. V48	Uncharacterized protein	N824_10800	IPR006311	Twin-arginine translocation pathway, signal sequence	COG0327;
TAT signal		UniProt Fam - pfam/interpro	Valid	NA	PF01784;	IPR002678;IPR036069;IPR006311;	A0A1E8FI44	OFI35610.1	Bacteria	Alteromonas lipolytica	Uncharacterized protein	BFC17_12705	IPR006311	Twin-arginine translocation pathway, signal sequence	COG0327;COG3323;
TAT signal		UniProt Fam - pfam/interpro	Valid	NA	PF01784;	IPR002678;IPR036069;IPR006311;	A0A4R8D515	TDW85622.1	Bacteria	Larkinella sp. BK230	Putative NIF3 family GTP cyclohydrolase 1 type 2	EV590_1095	IPR006311	Twin-arginine translocation pathway, signal sequence	COG0327;COG3323;
TAT signal		UniProt Fam - pfam/interpro	Invalid	NA	PF01784;	IPR002678;IPR036069;IPR006311;	A0A1M3HPL1	OJW60651.1	Bacteria	Sphingobacteriales bacterium 50-39	NGG1p interacting factor NIF3	BGO55_29375	NA	NA	COG0327;COG3323;
TAT signal		UniProt Fam - pfam/interpro	Invalid	NA	PF01784;	IPR002678;IPR036069;IPR006311;IPR019546;	A0A1Q4FBP0	OJY90482.1	Bacteria	Sphingobacteriales bacterium 44-15	NGG1p interacting factor NIF3	BGP14_11525	NA	NA	COG0327;COG3323;
TAT signal		UniProt Fam - pfam/interpro	Valid	NA	PF01784;	IPR002678;IPR036069;IPR006311;	A0A2T7BE44	PUZ23300.1	Bacteria	Chitinophaga parva	Uncharacterized protein	DCC81_23205	IPR006311	Twin-arginine translocation pathway, signal sequence	COG0327;COG3323;
TAT signal		UniProt Fam - pfam/interpro	Invalid	NA	PF01784;	IPR002678;IPR036069;IPR006311;	A0A317J430	PWU06375.1	Bacteria	Acidobacteriia bacterium	Uncharacterized protein	C5B51_12345	NA	NA	COG0327;COG3323;
TAT signal		UniProt Fam - pfam/interpro	Invalid	NA	PF01784;	IPR002678;IPR036069;IPR006311;	A0A1Q3P559	OJV12737.1	Bacteria	Dyadobacter sp. 50-39	Uncharacterized protein	BGO21_03055	NA	NA	COG0327;COG3323;
TAT signal		UniProt Fam - pfam/interpro	Valid	NA	PF01784;	IPR002678;IPR036069;IPR006311;	A0A364WF81	RAV54291.1	Bacteria	Mucilaginibacter rubeus	NGG1p interacting factor NIF3	DIU36_20780	IPR006311	Twin-arginine translocation pathway, signal sequence	COG0327;COG3323;
TAT signal		UniProt Fam - pfam/interpro	Valid	NA	PF01784;	IPR002678;IPR036069;IPR006311;IPR019546;	A0A5C1I1G4	QEM11763.1	Bacteria	Mucilaginibacter rubeus	Twin-arginine translocation signal domain-containing protein	DEO27_017600	IPR006311	Twin-arginine translocation pathway, signal sequence	COG0327;COG3323;
TAT signal		UniProt Fam - pfam/interpro	Valid	NA	PF01784;	IPR002678;IPR036069;IPR006311;	A0A2P8G2Q5	PSL28263.1	Bacteria	Chitinophaga ginsengisoli	Putative NIF3 family GTP cyclohydrolase 1 type 2	CLV42_108182	IPR006311	Twin-arginine translocation pathway, signal sequence	COG0327;COG3323;
TAT signal		UniProt Fam - pfam/interpro	Valid	NA	PF01784;	IPR002678;IPR036069;IPR006311;	A0A372IJ62	RFU14781.1	Bacteria	Acidipila sp. 4G-K13	Uncharacterized protein	D0Y96_20235	IPR006311	Twin-arginine translocation pathway, signal sequence	COG0327;COG3323;
TAT signal		UniProt Fam - pfam/interpro	Valid	NA	PF01784;	IPR002678;IPR036069;IPR006311;	A0A1I5I0S0	SFO53641.1	Bacteria	Chitinophaga sp. YR627	Putative GTP cyclohydrolase 1 type 2, NIF3 family	SAMN05428949_5632	IPR006311	Twin-arginine translocation pathway, signal sequence	COG0327;COG3323;
TAT signal		UniProt Fam - pfam/interpro	Valid	NA	PF01784;	IPR002678;IPR036069;IPR006311;	A0A6C0GR62	QHT69990.1	Bacteria	Rhodocytophaga sp. 172606-1	NGG1p interacting factor NIF3	GXP67_26770	IPR006311	Twin-arginine translocation pathway, signal sequence	COG0327;COG3323;
TAT signal		UniProt Fam - pfam/interpro	Invalid	NA	PF01784;	IPR002678;IPR036069;IPR006311;	A0A7C3LJV2	HFS53611.1	Bacteria	Planctomycetes bacterium	Uncharacterized protein (Fragment)	ENR24_06545	NA	NA	COG0327;COG3323;
TAT signal		UniProt Fam - pfam/interpro	Invalid	NA	PF01784;	IPR002678;IPR036069;IPR006311;	A0A4Q3FEM9	RYE30883.1	Bacteria	Sphingobacteriaceae bacterium	NGG1p interacting factor NIF3	EOP42_11445	NA	NA	COG0327;COG3323;
TAT signal		UniProt Fam - pfam/interpro	Invalid	NA	PF01784;	IPR002678;IPR036069;IPR006311;	A0A4Q6EDD6	RZA01790.1	Bacteria	Sphingobacteriaceae bacterium	NGG1p interacting factor NIF3	EOP47_09310	NA	NA	COG0327;COG3323;
TAT signal		UniProt Fam - pfam/interpro	Valid	NA	PF01784;	IPR002678;IPR036069;IPR006311;	A0A1H7B9G1	SEJ73524.1	Bacteria	Dyadobacter sp. SG02	Putative GTP cyclohydrolase 1 type 2, NIF3 family	SAMN05216327_117175	IPR006311	Twin-arginine translocation pathway, signal sequence	COG0327;COG3323;
TAT signal		UniProt Fam - pfam/interpro	Valid	NA	PF01784;	IPR002678;IPR036069;IPR006311;	A0A372IV29	RFU18651.1	Bacteria	Acidipila sp. 4G-K13	Uncharacterized protein	D0Y96_03660	IPR006311	Twin-arginine translocation pathway, signal sequence	COG0327;COG3323;
TAT signal		UniProt Fam - pfam/interpro	Valid	NA	PF01784;	IPR002678;IPR036069;IPR006311;	A0A497YZP7	RLK01591.1	Bacteria	Mucilaginibacter sp. YR332	Putative NIF3 family GTP cyclohydrolase 1 type 2	A9A38_3813	IPR006311	Twin-arginine translocation pathway, signal sequence	COG0327;COG3323;
TAT signal		UniProt Fam - pfam/interpro	Valid	NA	PF01784;	IPR002678;IPR036069;IPR006311;	A0A6H2BJN2	QJB39353.1	Bacteria	Chitinophaga sp. 1303	NGG1p interacting factor NIF3	HF324_16390	IPR006311	Twin-arginine translocation pathway, signal sequence	COG0327;COG3323;
TAT signal		UniProt Fam - pfam/interpro	Valid	NA	PF01784;	IPR002678;IPR036069;IPR006311;	A0A4Q7P6U6	RZS95507.1	Bacteria	Cecembia calidifontis	Putative NIF3 family GTP cyclohydrolase 1 type 2	BC751_1040	IPR006311	Twin-arginine translocation pathway, signal sequence	COG0327;COG3323;
TAT signal		UniProt Fam - pfam/interpro	Valid	NA	PF01784;	IPR002678;IPR036069;IPR006311;	A0A5B9E8D2	QEE28453.1	Bacteria	Terriglobus albidus	Uncharacterized protein	FTW19_10850	IPR006311	Twin-arginine translocation pathway, signal sequence	COG0327;COG3323;
TAT signal		UniProt Fam - pfam/interpro	Valid	NA	PF01784;	IPR002678;IPR036069;IPR006311;	A0A5B2VZK2	KAA2243567.1	Bacteria	Chitinophaga sp. BN140078	Uncharacterized protein	F0L74_13835	IPR006311	Twin-arginine translocation pathway, signal sequence	COG0327;COG3323;
TAT signal		UniProt Fam - pfam/interpro	Valid	NA	PF01784;	IPR002678;IPR036069;IPR006311;	A0A4Y8SE96	TFF37349.1	Bacteria	Mucilaginibacter psychrotolerans	Uncharacterized protein	E2R66_13030	IPR006311	Twin-arginine translocation pathway, signal sequence	COG0327;COG3323;
TAT signal		UniProt Fam - pfam/interpro	Valid	NA	PF01784;	IPR002678;IPR036069;IPR006311;	A0A2P8G838	PSL30136.1	Bacteria	Dyadobacter jiangsuensis	Putative NIF3 family GTP cyclohydrolase 1 type 2	CLV60_10478	IPR006311	Twin-arginine translocation pathway, signal sequence	COG0327;COG3323;
TAT signal		UniProt Fam - pfam/interpro	Invalid	NA	PF01784;	IPR002678;IPR036069;IPR006311;	A0A2W6SAD5	PZU08765.1	Bacteria	Sphingomonas sp.	Uncharacterized protein	DI605_12610	NA	NA	COG0327;COG3323;
TAT signal		UniProt Fam - pfam/interpro	Valid	NA	PF01784;	IPR002678;IPR036069;IPR006311;	A0A1M7RCR5	SHN43858.1	Bacteria	Chitinophaga sp. CF418	GTP cyclohydrolase 1 type 2, NIF3 family	SAMN05216311_116100	IPR006311	Twin-arginine translocation pathway, signal sequence	COG0327;COG3323;
TAT signal		UniProt Fam - pfam/interpro	Valid	NA	PF01784;	IPR002678;IPR036069;IPR006311;	A0A4R6IEI5	TDO19325.1	Bacteria	Pedobacter duraquae	Putative NIF3 family GTP cyclohydrolase 1 type 2	CLV32_4565	IPR006311	Twin-arginine translocation pathway, signal sequence	COG0327;COG3323;
TAT signal		UniProt Fam - pfam/interpro	Valid	NA	PF01784;	IPR002678;IPR036069;IPR006311;	A0A4Q5QS19	RYY10932.1	Bacteria	Chitinophagaceae bacterium	NGG1p interacting factor NIF3	EOO04_36115	IPR006311	Twin-arginine translocation pathway, signal sequence	COG0327;COG3323;
TAT signal		UniProt Fam - pfam/interpro	Valid	NA	PF01784;	IPR002678;IPR036069;IPR006311;	A0A1M7ZA55	SHO61566.1	Bacteria	Algoriphagus zhangzhouensis	Putative GTP cyclohydrolase 1 type 2, NIF3 family	SAMN04488108_1426	IPR006311	Twin-arginine translocation pathway, signal sequence	COG0327;COG3323;
TAT signal		UniProt Fam - pfam/interpro	Invalid	NA	PF01784;	IPR002678;IPR036069;IPR006311;	A0A3M1UHP2	RMG28516.1	Bacteria	Bacteroidetes bacterium	NGG1p interacting factor NIF3	D6730_05340	NA	NA	COG0327;COG3323;
TAT signal		UniProt Fam - pfam/interpro	Invalid	NA	PF01784;	IPR002678;IPR036069;IPR006311;	A0A2W4PRL0	PZN57988.1	Bacteria	Bacteroidetes bacterium	NGG1p interacting factor NIF3	DIU61_01195	NA	NA	COG0327;COG3323;
TAT signal		UniProt Fam - pfam/interpro	Invalid	NA	PF01784;	IPR002678;IPR036069;IPR006311;	A0A3N5ZE45	RPJ83820.1	Bacteria	Acidobacteria bacterium	NGG1p interacting factor NIF3	EHM18_13080	NA	NA	COG0327;COG3323;
TAT signal		UniProt Fam - pfam/interpro	Invalid	NA	PF01784;	IPR002678;IPR036069;IPR006311;	A0A2W4RWY7	PZN88505.1	Bacteria	Acidobacteria bacterium	Uncharacterized protein	DIU54_01995	NA	NA	COG0327;COG3323;
TAT signal		UniProt Fam - pfam/interpro	Valid	NA	PF01784;	IPR002678;IPR036069;IPR006311;IPR019546;	A0A562UHC0	TWJ04461.1	Bacteria	Mucilaginibacter frigoritolerans	Secreted protein	JN11_00170	IPR006311	Twin-arginine translocation pathway, signal sequence	COG0327;COG3323;
TAT signal		UniProt Fam - pfam/interpro	Valid	NA	PF01784;	IPR002678;IPR036069;IPR006311;	A0A318UMI3	PYF77706.1	Bacteria	Mucilaginibacter sp. OV119	Putative NIF3 family GTP cyclohydrolase 1 type 2	C7486_1186	IPR006311	Twin-arginine translocation pathway, signal sequence	COG0327;COG3323;
TAT signal		UniProt Fam - pfam/interpro	Valid	NA	PF01784;	IPR002678;IPR036069;IPR006311;	A0A1G4RVL4	SCW60771.1	Bacteria	Mucilaginibacter sp. NFR10	Putative GTP cyclohydrolase 1 type 2, NIF3 family	SAMN03159284_02228	IPR006311	Twin-arginine translocation pathway, signal sequence	COG0327;COG3323;
TAT signal		UniProt Fam - pfam/interpro	Valid	NA	PF01784;	IPR002678;IPR036069;IPR006311;	A0A2H9VLD1	PJJ79122.1	Bacteria	Mucilaginibacter auburnensis	Putative NIF3 family GTP cyclohydrolase 1 type 2	CLV57_2247	IPR006311	Twin-arginine translocation pathway, signal sequence	COG0327;COG3323;
TAT signal		UniProt Fam - pfam/interpro	Valid	NA	PF01784;	IPR002678;IPR036069;IPR006311;	A0A494VYT5	AYL99469.1	Bacteria	Mucilaginibacter sp. HYN0043	NGG1p interacting factor NIF3	HYN43_016565	IPR006311	Twin-arginine translocation pathway, signal sequence	COG0327;COG3323;
TAT signal		UniProt Fam - pfam/interpro	Valid	NA	PF01784;	IPR002678;IPR036069;IPR006311;	T0ISB1	EQB31720.1	Bacteria	Sphingobium ummariense RL-3	Uncharacterized protein	M529_13145	IPR006311	Twin-arginine translocation pathway, signal sequence	COG0327;COG3323;
TAT signal		UniProt Fam - pfam/interpro	Valid	NA	PF01784;	IPR002678;IPR036069;IPR006311;	A0A2A2S6J3	PAW94282.1	Bacteria	Mucilaginibacter sp. MD40	Uncharacterized protein	CKK33_12605	IPR006311	Twin-arginine translocation pathway, signal sequence	COG0327;COG3323;
TAT signal		UniProt Fam - pfam/interpro	Valid	NA	PF01784;	IPR002678;IPR036069;IPR006311;	A0A143PJ92	AMY07839.1	Bacteria	Luteitalea pratensis	Dinuclear metal center protein, YbgI/ family	LuPra_01020	IPR006311	Twin-arginine translocation pathway, signal sequence	COG0327;COG3323;
TAT signal		UniProt Fam - pfam/interpro	Valid	NA	PF01784;	IPR002678;IPR036069;IPR006311;	A0A2Z5G0V5	AXC12206.1	Bacteria	Acidisarcina polymorpha	Uncharacterized protein	ACPOL_2902	IPR006311	Twin-arginine translocation pathway, signal sequence	COG0327;
TAT signal		UniProt Fam - pfam/interpro	Valid	NA	PF01784;	IPR002678;IPR036069;IPR006311;	A0A5B8W408	QEC78269.1	Bacteria	Mucilaginibacter ginsenosidivorax	NGG1p interacting factor NIF3	FSB76_20845	IPR006311	Twin-arginine translocation pathway, signal sequence	COG0327;COG3323;
TAT signal		UniProt Fam - pfam/interpro	Valid	NA	PF01784;	IPR002678;IPR036069;IPR006311;	A0A1G8KVR2	SDI47453.1	Bacteria	Mucilaginibacter gossypii	Putative GTP cyclohydrolase 1 type 2, NIF3 family	SAMN05192573_12194	IPR006311	Twin-arginine translocation pathway, signal sequence	COG0327;COG3323;
TAT signal		UniProt Fam - pfam/interpro	Valid	NA	PF01784;	IPR002678;IPR036069;IPR006311;	A0A5C1ICL2	QEM15010.1	Bacteria	Mucilaginibacter gossypii	NGG1p interacting factor NIF3	DIU38_002210	IPR006311	Twin-arginine translocation pathway, signal sequence	COG0327;COG3323;
TAT signal		UniProt Fam - pfam/interpro	Valid	NA	PF01784;	IPR002678;IPR036069;IPR006311;	A0A5C6LKA9	TWV95645.1	Bacteria	Chitinophaga pinensis	NGG1p interacting factor NIF3	FEF09_24410	IPR006311	Twin-arginine translocation pathway, signal sequence	COG0327;COG3323;
Ankyrin repeat		UniProt Fam - pfam/interpro	Invalid	NA	PF01784;	IPR002110;IPR020683;IPR002678;IPR036069;	A0A198XF87	OAV31832.1	Bacteria	Moraxella catarrhalis F18	ANK	AO367_0352	NA	NA	COG0327;COG3323;
Ankyrin repeat		UniProt Fam - pfam/interpro	Invalid	NA	PF01784;	IPR002110;IPR020683;IPR002678;IPR036069;	A0A198UDQ4	AU94546.1	Bacteria	Moraxella catarrhalis Z7542	ANK	AO384_1903	NA	NA	COG0327;COG3323;
Ankyrin repeat		UniProt Fam - pfam/interpro	Invalid	NA	PF01784;	IPR002110;IPR020683;IPR002678;IPR036069;	D5VCB2	ADG61315.1	Bacteria	Moraxella catarrhalis BBH18	NIF3 family protein	MCR_1050	NA	NA	COG0327;COG3323;
Ankyrin repeat		UniProt Fam - pfam/interpro	Invalid	NA	PF01784;	IPR002110;IPR020683;IPR002678;IPR036069;	A0A1E9VUZ7	OFN29448.1	Bacteria	Moraxella sp. HMSC061H09	Nif3-like dinuclear metal center hexameric protein	HMPREF2573_06745	NA	NA	COG0327;COG3323;
Ankyrin repeat		UniProt Fam - pfam/interpro	Invalid	NA	PF01784;	IPR002110;IPR020683;IPR002678;IPR036069;	A0A198WNN3	RKL90268.1	Bacteria	Moraxella catarrhalis COPD_M112	Nif3-like dinuclear metal center hexameric protein	AO370_1977 D6D77_00265	NA	NA	COG0327;COG3323;
Ankyrin repeat		UniProt Fam - pfam/interpro	Invalid	NA	PF01784;	IPR002110;IPR020683;IPR002678;IPR036069;	A0A3A9N4D0	RKM04340.1	Bacteria	Moraxella catarrhalis COPD_M82	Nif3-like dinuclear metal center hexameric protein	D6E05_03060	NA	NA	COG0327;COG3323;
Ankyrin repeat		UniProt Fam - pfam/interpro	Invalid	NA	PF01784;	IPR002110;IPR020683;IPR002678;IPR036069;	A0A3S9QCG9	AZQ92462.1	Bacteria	Moraxella catarrhalis 46P58B1	NIF3 family protein	EJK53_1176	NA	NA	COG0327;COG3323;
Ankyrin repeat		UniProt Fam - pfam/interpro	Invalid	NA	PF01784;	IPR002110;IPR020683;IPR002678;IPR036069;	A0A198Y1W7	OAV38098.1	Bacteria	Moraxella catarrhalis C031	ANK	AO365_0194	NA	NA	COG0327;COG3323;
PI3K accessory		UniProt Fam - pfam/interpro	Invalid	NA	PF01784;	IPR002678;IPR036069;IPR001263;	A0A2W5HVR2	PZP64874.1	Bacteria	Dechlorosoma suillum	Nif3-like dinuclear metal center hexameric protein	DI596_00830	NA	NA	COG0327;COG3323;
PI3K accessory		UniProt Fam - pfam/interpro	Invalid	NA	PF01784;	IPR002678;IPR036069;IPR001263;	A0A1R1IE05	OMG56924.1	Bacteria	Azonexus hydrophilus	Nif3-like dinuclear metal center hexameric protein	BJN45_03800	NA	NA	COG0327;COG3323;
PI3K accessory		UniProt Fam - pfam/interpro	Invalid	NA	PF01784;	IPR002678;IPR036069;IPR001263;	A0A5C7EPY7	TXF10552.1	Bacteria	Hydrogenophilales bacterium SM250	Nif3-like dinuclear metal center hexameric protein	FR698_14735	NA	NA	COG0327;COG3323;
PAS	PAS: Per - period circadian protein; Arnt - Ah receptor nuclear translocator protein; Sim - single-minded protein	UniProt Fam - pfam/interpro	Invalid	NA	PF01784;	IPR002678;IPR036069;IPR000014;	A0A6F8V8U9	BCB25547.1	Bacteria	Sulfurimicrobium lacus	GTP cyclohydrolase 1 type 2	SKTS_04330	NA	NA	COG0327;COG3323;
PAS	PAS: Per - period circadian protein; Arnt - Ah receptor nuclear translocator protein; Sim - single-minded protein	UniProt Fam - pfam/interpro	Invalid	NA	PF01784;	IPR002678;IPR036069;IPR000014;	A0A2D7P8R2	MAJ55574.1	Bacteria	Gammaproteobacteria bacterium	Nif3-like dinuclear metal center hexameric protein	CMP92_06380	NA	NA	COG0327;COG3323;
PAS	PAS: Per - period circadian protein; Arnt - Ah receptor nuclear translocator protein; Sim - single-minded protein	UniProt Fam - pfam/interpro	Invalid	NA	PF01784;	IPR002678;IPR036069;IPR000014;	A0A2E8L325	MBQ85840.1	Bacteria	Gammaproteobacteria bacterium	Nif3-like dinuclear metal center hexameric protein	CMQ16_05490	NA	NA	COG0327;COG3323;
PAS	PAS: Per - period circadian protein; Arnt - Ah receptor nuclear translocator protein; Sim - single-minded protein	UniProt Fam - pfam/interpro	Invalid	NA	PF01784;	IPR002678;IPR036069;IPR000014;	A0A1Z9WB01	OUX74929.1	Bacteria	Gammaproteobacteria bacterium TMED107	Nif3-like dinuclear metal center hexameric protein	CBC67_05960	NA	NA	COG0327;COG3323;
Rhodanese	Thiosulfate sulfurtransferase	UniProt Fam - pfam/interpro	Conditional	NA	PF01784;PF00581;	IPR002678;IPR036069;IPR001763;IPR036873;	A0A523S1I0	TET11699.1	Archaea	Thorarchaeota archaeon (strain OWC)	Rhodanese domain-containing protein	E3J86_02190	COG0607	Thiazole production in thiamine biosynthesis;thiosulfate sulfurtransferase activity (COG2897)	COG0327;COG0607;COG2897;COG2210;COG4283;COG3323;
Rhodanese	Thiosulfate sulfurtransferase	UniProt Fam - pfam/interpro	Conditional	NA	PF01784;PF00581;	IPR002678;IPR036069;IPR001763;IPR036873;	A0A1Q9NQ61	OLS24250.1	Archaea	Candidatus Heimdallarchaeota archaeon LC	Thiosulfate sulfurtransferase GlpE (EC 2.8.1.1)	glpE HeimC3_21490	COG0607	Thiazole production in thiamine biosynthesis;thiosulfate sulfurtransferase activity (COG2897)	COG0327;COG2897;COG0607;COG2210;COG4283;COG3323;
Methyltransferase	SAM-dependent methyltransferase	UniProt Fam - pfam/interpro	Invalid	NA	PF01784;	IPR002678;IPR036069;IPR029063;	A0A1A9YSN1	KK352759.1	Eukaryota	Glossina fuscipes fuscipes	Uncharacterized protein	GfusI1:KK352759.1	NA	NA	COG0327;COG3323;COG2384;
Methyltransferase	SAM-dependent methyltransferase	UniProt Fam - pfam/interpro	Invalid	NA	PF01784;	IPR002678;IPR036069;IPR029063;	A0A351ZDZ0	HBB19422.1	Bacteria	Ruminococcus sp.	GTP cyclohydrolase 1 type 2 homolog	DCZ62_03165	NA	NA	COG0327;COG2384;COG3323;COG2813;
Methyltransferase	SAM-dependent methyltransferase	UniProt Fam - pfam/interpro	Invalid	NA	PF01784;	IPR002678;IPR036069;IPR029063;	A0A1Q6QDG2	OLA28143.1	Bacteria	Faecalibacterium sp. CAG:82-related	GTP cyclohydrolase 1 type 2 homolog (Fragment)	BHW25_00270	NA	NA	COG0327;COG3323;COG2384;COG2813;COG4106;
Methyltransferase	SAM-dependent methyltransferase	UniProt Fam - pfam/interpro	Invalid	NA	PF01784;	IPR002678;IPR036069;IPR029063;	A0A1V5GPQ5	OPZ21340.1	Bacteria	Firmicutes bacterium ADurb.BinA205	GTP cyclohydrolase 1 type 2 homolog	BWZ04_01074	NA	NA	COG0327;COG2384;COG3323;
Methyltransferase	SAM-dependent methyltransferase	UniProt Fam - pfam/interpro	Valid	NA	PF01784;	IPR002678;IPR036069;IPR029063;	A0A1K1P671	SFW43282.1	Bacteria	Ruminococcus flavefaciens	GTP cyclohydrolase 1 type 2 homolog	SAMN02910280_2533	COG2384	tRNA (adenine-N1-)-methyltransferase activity	COG2384;COG0327;COG3323;
Methyltransferase	SAM-dependent methyltransferase	UniProt Fam - pfam/interpro	Valid	NA	PF01784;	IPR002678;IPR036069;IPR029063;	A0A1Y4H6A9	OUP03607.1	Bacteria	Anaerofilum sp. An201	GTP cyclohydrolase 1 type 2 homolog	B5F36_09025	COG2384	tRNA (adenine-N1-)-methyltransferase activity; cyclopropane-fatty-acyl-phospholipid synthase (COG2230); Catalyzes the S-adenosyl-L-methionine-dependent formation of N(1)-methyladenine at position 58 (m1A58) in tRNA (COG2519); rRNA (guanine-N2-)-methyltransferase activity (COG2813)	COG0327;COG3323;COG2384;COG2230;COG2519;COG2813;COG2264;COG4976;COG2890;COG2226;COG2227;COG4106;
Methyltransferase	SAM-dependent methyltransferase	UniProt Fam - pfam/interpro	Valid	NA	PF01784;	IPR002678;IPR036069;IPR029063;	R6TZV8	CDC78963.1	Bacteria	Clostridium sp. CAG:964	GTP cyclohydrolase 1 type 2 homolog	BN818_00528	COG2384	tRNA (adenine-N1-)-methyltransferase activity	COG0327;COG2384;COG3323;
Methyltransferase	SAM-dependent methyltransferase	UniProt Fam - pfam/interpro	Valid	NA	PF01784;	IPR002678;IPR036069;IPR029063;	A0A1M7J9A7	SHM49508.1	Bacteria	Ruminococcus flavefaciens	GTP cyclohydrolase 1 type 2 homolog	SAMN04487860_105208	COG2384	tRNA (adenine-N1-)-methyltransferase activity	COG0327;COG2384;COG3323;
Methyltransferase	SAM-dependent methyltransferase	UniProt Fam - pfam/interpro	Valid	NA	PF01784;	IPR002678;IPR036069;IPR029063;	A0A315XZ86	PWJ13054.1	Bacteria	Ruminococcus flavefaciens	GTP cyclohydrolase 1 type 2 homolog	IE37_01553	COG2384	tRNA (adenine-N1-)-methyltransferase activity	COG0327;COG2384;COG3323;
Methyltransferase	SAM-dependent methyltransferase	UniProt Fam - pfam/interpro	Valid	NA	PF01784;	IPR002678;IPR036069;IPR029063;	A0A1H7K455	SEK81354.1	Bacteria	Ruminococcus flavefaciens	GTP cyclohydrolase 1 type 2 homolog	SAMN02910353_01331	COG2384	tRNA (adenine-N1-)-methyltransferase activity	COG2384;COG0327;COG3323;
Methyltransferase	SAM-dependent methyltransferase	UniProt Fam - pfam/interpro	Invalid	NA	PF01784;	IPR002678;IPR036069;IPR029063;	A0A3C2BAW6	HAP78958.1	Bacteria	Ruminococcus sp.	GTP cyclohydrolase 1 type 2 homolog	DCQ78_02025	NA	NA	COG0327;COG2384;COG3323;
Methyltransferase	SAM-dependent methyltransferase	UniProt Fam - pfam/interpro	Invalid	NA	PF01784;	IPR002678;IPR036069;IPR029063;	A0A349GPI5	HAS78948.1	Bacteria	Ruminococcus sp.	GTP cyclohydrolase 1 type 2 homolog	DCS38_04445 DD392_04235 DIW26_05640	NA	NA	COG0327;COG2384;COG3323;
Methyltransferase	SAM-dependent methyltransferase	UniProt Fam - pfam/interpro	Invalid	NA	PF01784;	IPR002678;IPR036069;IPR029063;	R7MPN5	HBN11164.1	Bacteria	Ruminococcus sp. CAG:624	GTP cyclohydrolase 1 type 2 homolog	BN739_01661	NA	NA	COG0327;COG2384;COG3323;
Methyltransferase	SAM-dependent methyltransferase	UniProt Fam - pfam/interpro	Invalid	NA	PF01784;	IPR002678;IPR036069;IPR029063;	A0A352DME4	HBB71376.1	Bacteria	Ruminococcus sp.	GTP cyclohydrolase 1 type 2 homolog	DCZ71_02070	NA	NA	COG0327;COG2384;COG3323;COG2813;COG2890;
Methyltransferase	SAM-dependent methyltransferase	UniProt Fam - pfam/interpro	Valid	NA	PF01784;	IPR002678;IPR036069;IPR029063;	A0A1H6HY50	SEH40925.1	Bacteria	Ruminococcus flavefaciens	GTP cyclohydrolase 1 type 2 homolog	SAMN02910265_00464	COG2384	tRNA (adenine-N1-)-methyltransferase activity	COG0327;COG2384;COG3323;
Methyltransferase	SAM-dependent methyltransferase	UniProt Fam - pfam/interpro	Valid	NA	PF01784;	IPR002678;IPR036069;IPR029063;	A0A1K1TH26	SFW99846.1	Bacteria	Ruminococcus flavefaciens	GTP cyclohydrolase 1 type 2 homolog	SAMN04487832_101158	COG2384	tRNA (adenine-N1-)-methyltransferase activity	COG0327;COG2384;COG3323;
Methyltransferase	SAM-dependent methyltransferase	UniProt Fam - pfam/interpro	Valid	NA	PF01784;	IPR002678;IPR036069;IPR029063;	A0A1C6D8P3	SCJ04932.1	Bacteria	uncultured Ruminococcus sp.	GTP cyclohydrolase 1 type 2 homolog	SAMEA3545397_01939	COG2384	tRNA (adenine-N1-)-methyltransferase activity	COG0327;COG2384;COG3323;
Methyltransferase	SAM-dependent methyltransferase	UniProt Fam - pfam/interpro	Valid	NA	PF01784;	IPR002678;IPR036069;IPR029063;	W7V3L4	EWM55247.1	Bacteria	Ruminococcus flavefaciens 007c	GTP cyclohydrolase 1 type 2 homolog	RF007C_04640	COG2384	tRNA (adenine-N1-)-methyltransferase activity	COG0327;COG2384;COG3323;
Methyltransferase	SAM-dependent methyltransferase	UniProt Fam - pfam/interpro	Invalid	NA	PF01784;	IPR002678;IPR036069;IPR029063;	A0A1S9CP12	OON98510.1	Bacteria	Epulopiscium sp. Nele67-Bin004	GTP cyclohydrolase 1 type 2 homolog	ATN35_04800	NA	NA	COG0327;COG2384;COG3323;
Methyltransferase	SAM-dependent methyltransferase	UniProt Fam - pfam/interpro	Valid	NA	PF01784;	IPR002678;IPR036069;IPR029063;	R6TVZ8	CDC62787.1	Bacteria	Clostridium sp. CAG:448	GTP cyclohydrolase 1 type 2 homolog	BN660_01681	COG2384	tRNA (adenine-N1-)-methyltransferase activity	COG0327;COG2384;COG3323;
Zinc finger	RING-type	UniProt Fam - pfam/interpro	Valid	NA	PF01784;PF02591;	IPR002678;IPR036069;IPR003743;	A0A4D4KYB2	GDY53164.1	Bacteria	Streptomyces violaceusniger	zf-RING	SVIO_037870	COG1579	zf-RING_7	COG0327;COG3323;COG1579;
Zinc finger	RING-type	UniProt Fam - pfam/interpro	Valid	NA	PF01784;PF02591;	IPR002678;IPR036069;IPR003743;	Q7MQP7	CAE11115.1	Bacteria	Wolinella succinogenes	zf-RING	WS2117	COG1579	zf-RING_7	COG0327;COG3323;
ATPase	nucleotide-binding active site	UniProt Fam - pfam/interpro	Invalid	NA	PF01784;	IPR020003;IPR002678;IPR036069;	A0A350THV7	HAX29875.1	Bacteria	Oscillibacter sp.	GTP cyclohydrolase 1 type 2 homolog	DCX96_01165	NA	NA	COG0327;COG3323;
ATPase	nucleotide-binding active site	UniProt Fam - pfam/interpro	Invalid	NA	PF01784;	IPR020003;IPR002678;IPR036069;	R6D9Z7	CDA80976.1	Bacteria	Firmicutes bacterium CAG:176	GTP cyclohydrolase 1 type 2 homolog	BN516_01006	NA	NA	COG0327;COG3323;
ATPase	nucleotide-binding active site	UniProt Fam - pfam/interpro	Invalid	NA	PF01784;	IPR020003;IPR002678;IPR036069;	A0A3D2IC88	HCI69038.1	Bacteria	Oscillibacter sp.	GTP cyclohydrolase 1 type 2 homolog	DER17_08420	NA	NA	COG0327;COG3323;
ATPase	nucleotide-binding active site	UniProt Fam - pfam/interpro	Invalid	NA	PF01784;	IPR020003;IPR002678;IPR036069;	A0A3D2YGY6	HCL21486.1	Bacteria	Oscillibacter sp.	GTP cyclohydrolase 1 type 2 homolog	DHW47_06115	NA	NA	COG0327;COG3323;
COG6	Conserved oligomeric Golgi complex subunit 6 (COG6)	UniProt Fam - pfam/interpro	Inconclusive	NA	PF06419;PF01784;	IPR010490;IPR002678;IPR036069;	A0A3M7MGS3	RMZ73667.1	Eukaryota	Pyrenophora seminiperda CCB06	Conserved oligomeric Golgi complex subunit 6 (COG complex subunit 6) (Component of oligomeric Golgi complex 6)	GMOD_00009415	pfam06419	Conserved oligomeric Golgi complex subunit 6 (IPR010490)	COG0327;COG3323;
COG6	Conserved oligomeric Golgi complex subunit 6 (COG6)	UniProt Fam - pfam/interpro	Inconclusive	NA	PF06419;PF01784;	IPR010490;IPR002678;IPR036069;	A0A364N878	RAR13528.1	Eukaryota	Stemphylium lycopersici	Conserved oligomeric Golgi complex subunit 6 (COG complex subunit 6) (Component of oligomeric Golgi complex 6)	DDE83_003127	pfam06419	Conserved oligomeric Golgi complex subunit 6 (IPR010490)	COG0327;COG3323;
Longin	VAMP, SNARE	UniProt Fam - pfam/interpro	Invalid	NA	PF01784;	IPR002678;IPR036069;IPR010908;	A0A6T8NLH3	CAB9070713.1	Eukaryota	Hemiselmis andersenii	Uncharacterized protein (Fragment)	HAND1043_LOCUS18187	NA	NA	COG0327;COG3323;
Longin	VAMP, SNARE	UniProt Fam - pfam/interpro	Invalid	NA	PF01784;	IPR002678;IPR036069;IPR010908;	A0A6U4TWP9	CAC1025336.1	Eukaryota	Hemiselmis andersenii	Uncharacterized protein (Fragment)	HAND00432_7323	NA	NA	COG0327;COG3323;
Longin	VAMP, SNARE	UniProt Fam - pfam/interpro	Invalid	NA	PF01784;	IPR002678;IPR036069;IPR010908;	A0A6U2BEX3	CAC0198482.1	Eukaryota	Hemiselmis andersenii	Uncharacterized protein (Fragment)	HAND1041_4246	NA	NA	COG0327;COG3323;
Longin	VAMP, SNARE	UniProt Fam - pfam/interpro	Invalid	NA	PF01784;	IPR002678;IPR036069;IPR010908;	A0A6U4M6M1	CAC0941521.1	Eukaryota	Hemiselmis andersenii	Uncharacterized protein (Fragment)	HAND1042_12554	NA	NA	COG0327;COG3323;
Nitrogen regulatory protein PII	N-reg	UniProt Fam - pfam/interpro	Valid	NA	PF01784;	IPR002678;IPR036069;IPR017221;IPR002187;IPR015867;	A0A1I1ZD98	SFE29298.1	Bacteria	Alteribacillus iranensis	GTP cyclohydrolase 1 type 2 homolog	SAMN05192532_101159	IPR002187﻿	Nitrogen regulatory protein PII	COG3323;COG0327;
Nitrogen regulatory protein PII	N-reg	UniProt Fam - pfam/interpro	Valid	NA	PF01784;	IPR002678;IPR036069;IPR017221;IPR002187;IPR015867;	A0A1G8CT52	SDH48443.1	Bacteria	Alteribacillus persepolensis	GTP cyclohydrolase 1 type 2 homolog	SAMN05192534_10665	IPR002187﻿	Nitrogen regulatory protein PII	COG3323;COG0327;
Transferase	ATP phosphoribosyltransferase HisG; Histidinol dehydrogenase; Sulphate adenylyltransferase; Adenylyl-sulfate kinase	UniProt Fam - pfam/interpro	Invalid	NA	PF05635;PF00155;PF00009;PF01634;PF00815;PF01784;PF01507;	IPR012657;IPR036583;IPR016161;IPR001917;IPR004839;IPR002891;IPR013820;IPR018198;IPR024893;IPR041757;IPR044138;IPR044139;IPR031157;IPR002678;IPR036069;IPR005861;IPR001692;IPR012131;IPR027417;IPR002500;IPR015424;IPR015422;IPR015421;IPR014729;IPR005225;IPR011779;IPR011784;IPR000795;IPR009000;IPR009001;	A0A699HSW0	GEY60218.1	Eukaryota	Tanacetum cinerariifolium	APS kinase (EC 1.1.1.23) (EC 2.3.1.50) (EC 2.7.1.25) (EC 2.7.7.4) (ATP adenosine-5'-phosphosulfate 3'-phosphotransferase) (ATP-sulfurylase large subunit) (ATP-sulfurylase small subunit) (Adenylyl-sulfate kinase) (Sulfate adenylate transferase) (Sulfate adenylyltransferase subunit 1) (Sulfate adenylyltransferase subunit 2)	Tci_432192	NA	NA	COG2895;COG0141;COG0529;COG3205;COG0079;COG0040;COG0327;COG0175;COG3276;COG0436;COG3323;COG0481;COG0480;COG1217;COG0050;COG0645;COG1160;COG3688;COG0532;COG4108;COG0699;COG1168;COG3977;COG1159;COG3749;COG3896;COG0125;COG1448;COG0572;COG3969;
Oxidoreductase	NADH-ubiquinone oxidoreductase; Acetyl-CoA carboxylase, biotin carboxylase	UniProt Fam - pfam/interpro	Invalid	NA	PF02785;PF00289;PF02786;PF01784;PF00507;PF01058;	IPR004549;IPR011761;IPR013815;IPR005481;IPR011764;IPR005482;IPR005479;IPR002678;IPR036069;IPR000440;IPR006137;IPR006138;IPR038430;IPR016185;IPR011054;	A0A6A5L104	KAF1855237.1	Eukaryota	Lupinus albus	Acetyl-CoA carboxylase subunit A (NADH dehydrogenase subunit 3) (NADH-ubiquinone oxidoreductase chain 3)	Lal_00008608	NA	NA	COG4770;COG1038;COG0439;COG0377;COG0838;COG0777;COG0327;COG3260;COG2232;COG0458;COG0026;COG1181;COG3919;COG0151;COG1984;COG0027;COG0511;COG1821;COG0505;COG3323;COG0041;
Response regulator	Transcription factor, T-box	UniProt Fam - pfam/interpro	Inconclusive	NA	PF13499;PF01784;PF01619;PF00907;	IPR011992;IPR018247;IPR002048;IPR029041;IPR002678;IPR036069;IPR008967;IPR002872;IPR036960;IPR001699;IPR018186;	A0A6A4S227	KAF0025382.1	Eukaryota	Scophthalmus maximus	Uncharacterized protein	F2P81_022263	COG5126	Ca2+-binding protein, EF-hand superfamily	COG0327;COG3323;COG5054;COG0506;COG5126;
Methyltransferase	tRNA methyltransferase TrmK	UniProt Fam - pfam/interpro	Valid, conditional	NA	PF01784;PF04816;	IPR002678;IPR036069;IPR029063;IPR006901;	A0A1H8ZHI3	SEP63989.1	Bacteria	Ignavigranum ruoffiae	GTP cyclohydrolase 1 type 2 homolog	SAMN04488558_101250	COG2384	tRNA (adenine-N1-)-methyltransferase activity	COG2384;COG0327;COG3323;
EF-hand pair	EF-hand pair	UniProt Fam - pfam/interpro	Valid, conditional	NA	PF13499;PF13833;PF01784;	IPR011992;IPR018247;IPR002048;IPR002678;IPR036069;	A0A498N151	RXN22507.1	Eukaryota	Labeo rohita	NIF3 1	ROHU_006714	COG5126	Ca2+-binding protein, EF-hand superfamily	COG0327;COG3323;COG5054;COG5126;
Phosphohexomutase	Alpha-D-phosphohexomutase, alpha/beta/alpha I/II/III	UniProt Fam - pfam/interpro	Invalid	NA	PF01784;PF02878;	IPR005844;IPR016055;IPR002678;IPR036069;	A0A1A9X722	GFUI000799	Eukaryota	Glossina fuscipes fuscipes	PGM	GfusI1:JFJR01012816.1	NA	NA	COG0033;COG3357;COG1109;COG0327;COG3323;
Uncharacterized	Nur1/Mug154	UniProt Fam - pfam/interpro	Inconclusive	NA	PF10332;PF01784;	IPR002678;IPR036069;IPR018819;	A0A1R0H439	OLY83907.1	Eukaryota	Smittium mucronatum	Protein NIF3-like protein	AYI68_g1946	pfam10332	Protein of unknown function (DUF2418)	COG0327;COG3323;
Phosphatase	Histidine phosphatase superfamily, clade-1	UniProt Fam - pfam/interpro	Inconclusive	NA	PF00300;PF01784;	IPR002678;IPR036069;IPR013078;IPR029033;IPR015867;	A0A0U1DR76	CQD21231.1	Bacteria	Mycolicibacterium conceptionense	Dinuclear metal center protein, YbgI/ family	BN970_04936	COG0406	alpha-ribazole phosphatase activity	COG3323;COG0327;COG0328;COG0406;COG2062;COG0588;
Response regulator	Transcription factor Skn7	UniProt Fam - pfam/interpro	Inconclusive	NA	PF00447;PF01784;PF00072;	IPR011006;IPR002678;IPR036069;IPR000232;IPR027725;IPR001789;IPR027718;IPR036388;IPR036390;	A0A3M7N688	RMZ82353.1	Eukaryota	Chaetothyriales sp. CBS 135597	Response regulatory domain-containing protein (Fragment)	DV738_g1916	COG5169;COG0784	sequence-specific DNA binding; Response regulator, receiver	COG0327;COG0784;COG3323;COG0642;COG2198;COG5002;COG4191;COG3706;COG4875;COG0643;COG2461;COG4753;COG2202;COG4999;COG4565;COG4566;COG3707;COG4720;COG2964;
Zinc finger	RING/FYVE/PHD-type	UniProt Fam - pfam/interpro	Valid, conditional	NA	PF01784;PF13445;	IPR002678;IPR036069;IPR027370;IPR001841;IPR013083;IPR017907;	A0A6A5SX80	KAF1945091.1	Eukaryota	Clathrospora elynae	RING-type domain-containing protein	EJ02DRAFT_509786	COG5432	RING-finger-containing E3 ubiquitin ligase	COG0327;
Zinc finger	RING/FYVE/PHD-type	UniProt Fam - pfam/interpro	Valid, conditional	NA	PF01784;PF13445;	IPR016197;IPR002678;IPR036069;IPR027370;IPR001841;IPR013083;IPR017907;	A0A6A5UCW4	KAF1958967.1	Eukaryota	Byssothecium circinans	RING-type domain-containing protein	CC80DRAFT_533913	COG5432	RING-finger-containing E3 ubiquitin ligase	COG0327;
Tyrosine phosphatase	Protein-tyrosine phosphatase-like; Dual specificity protein phosphatase domain; Kelch-type beta propeller; BTB/POZ domain	UniProt Fam - pfam/interpro	Valid, conditional	NA	PF00782;PF01784;	IPR000210;IPR000340;IPR002678;IPR036069;IPR015915;IPR029021;IPR011333;IPR016130;IPR003595;IPR000387;IPR020422;	A0A421JMT5	RLV92228.1	Eukaryota	Spathaspora sp. JA1	NGG1-interacting factor 3	JA1_003263	COG2453;pfam01344;cd18299	Protein-tyrosine phosphatase; Galactose oxidase, central domain; first BTB (Broad-Complex, Tramtrack and Bric a brac)/POZ	COG0327;COG3323;
Tyrosine phosphatase	Protein-tyrosine phosphatase-like; Dual specificity protein phosphatase domain	UniProt Fam - pfam/interpro	Valid, conditional	NA	PF00782;PF01784;	IPR000340;IPR002678;IPR036069;IPR029021;IPR020422;	A0A642US31	KAA8904096.1	Eukaryota	Diutina rugosa	Tyrosine-protein phosphatase domain-containing protein	DIURU_002048	COG2453	Protein-tyrosine phosphatase	COG0327;COG3323;
Tyrosine phosphatase	Protein-tyrosine phosphatase-like; Dual specificity protein phosphatase domain	UniProt Fam - pfam/interpro	Valid, conditional	NA	PF00782;PF01784;	IPR000340;IPR002678;IPR036069;IPR029021;IPR016130;IPR000387;IPR020422;	A0A367XR54	RCK56095.1	Eukaryota	Candida viswanathii	NGG1-interacting factor 3	NIF3 Cantr_05866	COG2453	Protein-tyrosine phosphatase	COG0327;COG3323;
Dehydrogenase	Short-chain dehydrogenase/reductase SDR	UniProt Fam - pfam/interpro	Inconclusive	NA	PF00106;PF01784;	IPR002678;IPR036069;IPR036291;IPR002347;	V5FCQ5	GAD94824.1	Eukaryota	Byssochlamys spectabilis (strain No. 5 / NBRC 109023)	NGG1 interacting factor Nif3, putative	PVAR5_3453	COG1028	NAD(P)-dependent dehydrogenase, short-chain alcohol dehydrogenase family	COG0327;COG3323;
Peptidase	Metalloenzyme, LuxS/M16 peptidase-like	UniProt Fam - pfam/interpro	Invalid	NA	PF01784;PF05193;	IPR002678;IPR036069;IPR011249;IPR015867;IPR007863;	A0A519L9B3	RZJ45919.1	Bacteria	Chryseobacterium sp.	Nif3-like dinuclear metal center hexameric protein (Fragment)	EOO19_10785	NA	NA	COG3323;COG0327;COG0612;
Cyclophilin-like	Cyclophilin-like domain superfamily; Cyclophilin TM1367-like domain	UniProt Fam - pfam/interpro	Invalid	NA	PF04126;PF01784;	IPR029000;IPR025658;IPR002678;IPR036069;IPR015867;	X1JV56	GAH98626.1	Bacteria	marine sediment metagenome	Cyclophil	S06H3_04639	NA	NA	COG3323;COG0327;COG2164;COG4925;
Transporter/membrane component	Solute-binding protein family 5	UniProt Fam - pfam/interpro	Invalid	NA	PF01784;PF00496;	IPR002678;IPR036069;IPR039424;IPR000914;	A0A0F8YPV6	KKK83443.1	Bacteria	marine sediment metagenome	SBP	LCGC14_2793320	NA	NA	COG4166;COG4533;COG0747;COG0327;COG3323;
Methyltransferase	mRNA (guanine-N(7))-methyltransferase domain	UniProt Fam - pfam/interpro	Invalid	NA	PF01784;PF03291;	IPR002678;IPR036069;IPR004971;IPR015867;	X1K8X0	GAH90075.1	Bacteria	marine sediment metagenome	mRNA cap 0 methyltransferase domain-containing protein (Fragment)	S06H3_05697	NA	NA	COG3323;COG0327;
Cyclophilin-like	KipI family; Carboxyltransferase domain, subdomain A and B; LamB/YcsF/PxpA-like	UniProt Fam - pfam/interpro	Valid, conditional	NA	PF02626;PF02682;PF03746;PF01784;	IPR003778;IPR003833;IPR029000;IPR011330;IPR002678;IPR036069;IPR010016;IPR005501;	A0A077ZC64	CDW57982.1	Eukaryota	Trichuris trichiura	LamB YcsF and AHS2 and AHS1 and NIF3 domain conta ining protein	TTRE_0000628301	COG1984;COG2049;COG1540	Allophanate hydrolase subunit 2; Allophanate hydrolase subunit 1; Lactam utilization protein B	COG1540;COG2049;COG1984;COG0327;COG3323;
Peptidase	Peptidase M20B, tripeptide aminopeptidase	UniProt Fam - pfam/interpro	Invalid	NA	PF07687;PF01784;	IPR001261;IPR036264;IPR002678;IPR036069;IPR011650;IPR010161;	A0A6P4JX33	XP_017087386.1	Eukaryota	Drosophila bipectinata	peptidase T-like	LOC108118951	NA	NA	COG2195;COG0327;COG3323;COG0624;
FAD-/NAD-binding	UCP036654; Transcription factor domain, fungi	UniProt Fam - pfam/interpro	Valid, conditional	NA	PF00890;PF04082;PF01784;	IPR003953;IPR036188;IPR002678;IPR036069;IPR027477;IPR007219;IPR014614;	A0A1S9D5J2	OOO04373.1	Eukaryota	Aspergillus oryzae	Fumarate reductase/succinate dehydrogenase flavoprotein domain protein	OAory_01052200	COG3573;pfam04082	steroid biosynthetic process/predicted oxidoreductase; Fungal specific transcription factor domain	COG3573;COG0327;COG3323;COG1053;COG3976;
DNA-binding	Histone H2A	UniProt Fam - pfam/interpro	Inconclusive	NA	PF00125;PF16211;PF01784;	IPR002678;IPR036069;IPR009072;IPR002119;IPR007125;IPR032454;IPR032458;	A0A177B8B7	OAF70380.1	Eukaryota	Intoshia linei	Histone H2A (Fragment)	A3Q56_01891	COG5262	Histone H2A	COG3323;COG0327;
Response regulator	BolA protein	UniProt Fam - pfam/interpro	Valid, conditional	NA	PF01722;PF01784;	IPR002634;IPR036065;IPR002678;IPR036069;	A0A6M7YMR5	QKD49708.1	Eukaryota	Fusarium oxysporum Fo47	Uncharacterized protein	FOBC_03738	COG0271	Stress-induced morphogen; pfam01722, BolA-like protein	COG0327;COG3323;COG5007;COG0271;
Hydrolase	Fumarylacetoacetase-like, C-terminal domain superfamily	UniProt Fam - pfam/interpro	Inconclusive	NA	PF01557;PF01784;	IPR011234;IPR036663;IPR002678;IPR036069;	A0A6L5C9Q7	KAF4516464.1	Eukaryota	Ephemera danica	FAA	B566_EDAN003211	COG0179	Fumarylacetoacetate (FAA) hydrolase; 2-keto-4-pentenoate hydratase/2-oxohepta-3-ene-1,7-dioic acid hydratase (catechol pathway)	COG0179;COG0327;COG3323;
rRNA	23S rRNA-intervening sequence protein	UniProt Fam - pfam/interpro	Invalid	NA	PF05635;PF01784;	IPR012657;IPR036583;IPR002678;IPR036069;IPR015867;	A0A521GHL1	TAE32306.1	Bacteria	Cytophagales bacterium	Nif3-like dinuclear metal center hexameric protein	EAZ91_05430	NA	NA	COG3323;COG0327;
Viral protein	Flavivirus non-structural protein NS4B	UniProt Fam - pfam/interpro	Invalid	NA	PF01349;PF01784;	IPR001528;IPR002678;IPR036069;	A0A2N2VWA3	PKO96212.1	Bacteria	Bacteroidetes bacterium HGW-Bacteroidetes-7	Nif3-like dinuclear metal center hexameric protein	CVU12_06560	NA	NA	COG0327;COG3323;
Isomerase	Sugar isomerase (SIS)	UniProt Fam - pfam/interpro	Invalid	NA	PF01784;PF13580;	IPR002678;IPR036069;IPR001347;	A0A7C4PHT4	HGS10824.1	Bacteria	Armatimonadetes bacterium	SIS domain-containing protein	ENT29_05425	NA	NA	COG4821;COG3323;COG0327;
Uncharacterized	Spore germination GerAC	UniProt Fam - pfam/interpro	Invalid	NA	PF01784;PF05504;	IPR002678;IPR036069;IPR008844;	A0A356U768	HBQ24884.1	Bacteria	Syntrophomonas sp.	GTP cyclohydrolase 1 type 2 homolog	DD791_00690	NA	NA	COG0327;COG3323;
Transferase	Pyridoxal phosphate-dependent transferase, major domain; Aminotransferase, class I/classII	UniProt Fam - pfam/interpro	Conditional, singleton	NA	PF00155;PF01784;	IPR004839;IPR002678;IPR036069;IPR015867;IPR004838;IPR015424;IPR015422;IPR015421;	R4MJN9	AGL27697.1	Bacteria	Mycobacterium tuberculosis CAS/NITR204	Aminotransferase (EC 2.6.1.-)	J113_15520	COG0079	Histidinol-phosphate/aromatic aminotransferase or cobyric acid decarboxylase	COG3323;COG0079;COG0327;COG0436;COG1167;COG0141;COG1168;
Uncharacterized	Bacillithiol biosynthesis BshC	UniProt Fam - pfam/interpro	Invalid	NA	PF10079;PF01784;	IPR011199;IPR002678;IPR036069;	A0A4Q5Z3B0	RYZ30174.1	Bacteria	Chitinophagaceae bacterium	Bacillithiol biosynthesis BshC	bshC EOO10_03800	NA	NA	COG4365;COG0327;COG3323;
NUDIX hydrolase	NUDIX hydrolase domain	UniProt Fam - pfam/interpro	Valid, conditional	NA	PF01784;PF00293;	IPR002678;IPR036069;IPR020476;IPR015797;IPR020084;IPR000086;	A0A087E9N5	KFJ04486.1	Bacteria	Bifidobacterium subtile	PadR family transcriptional regulator (EC 3.6.1.13)	BISU_0493	COG0494	NUDIX, 8-oxo-dGTP pyrophosphatase MutT and related house-cleaning NTP pyrophosphohydrolases	COG0327;COG3323;COG0494;COG2816;COG1443;
Synthase	Citrate synthase	UniProt Fam - pfam/interpro	Invalid	NA	PF00285;PF01784;	IPR002020;IPR036969;IPR002678;IPR036069;IPR015867;	A0A2A4LVD4	PCH51979.1	Bacteria	Flavobacteriaceae bacterium	Nif3-like dinuclear metal center hexameric protein	COC22_04850	NA	NA	COG3323;COG0327;COG0372;
Transporter/membrane component	Mitochondrial import inner membrane translocase subunit Tim54	UniProt Fam - pfam/interpro	Inconclusive	NA	PF01784;PF11711;	IPR002678;IPR036069;IPR021056;	Q5B6Z5	EAA59893.1	Eukaryota	Emericella nidulans (strain FGSC A4 / ATCC 38163 / CBS 112.46 / NRRL 194 / M139)	Mitochondrial import inner membrane translocase subunit TIM54	AN3685.2	pfam11711	Inner membrane protein import complex subunit Tim54	COG0327;COG3323;
Cyclophilin-like	KipI family; Carboxyltransferase domain, subdomain A and B	UniProt Fam - pfam/interpro	Valid, conditional	NA	PF02626;PF02682;PF01784;	IPR003778;IPR003833;IPR029000;IPR002678;IPR036069;IPR010016;	A0A0A2VUI6	KGQ11273.1	Eukaryota	Beauveria bassiana D1-5	Uncharacterized protein ybgK	BBAD15_g2974	COG1984;COG2049	Allophanate hydrolase subunit 2; Allophanate hydrolase subunit 1	COG2049;COG1984;COG0327;COG1540;COG3323;
Response regulator	Chromatin modification-related protein Eaf7/MRGBP	UniProt Fam - pfam/interpro	Inconclusive	NA	PF07904;PF01784;	IPR012423;IPR002678;IPR036069;	A0A0F7SRZ4	CED83424.1	Eukaryota	Phaffia rhodozyma	Ngg1-interacting factor 3 protein NIF3L1	CED83424.1	pfam07904	Chromatin modification-related protein EAF7	COG0327;COG3323;
Uncharacterized	Heterokaryon incompatibility (WD40 repeat subtype)	UniProt Fam - pfam/interpro	Inconclusive	NA	PF06985;PF01784;	IPR002678;IPR036069;IPR010730;	A0A1V8V835	OQO31763.1	Eukaryota	Rachicladosporium sp. CCFEE 5018	HET domain-containing protein	B0A51_00665	pfam06985	Heterokaryon incompatibility protein (HET)	COG0327;COG3323;
Kinesin-like	TPX2, C-terminal	UniProt Fam - pfam/interpro	Inconclusive	NA	PF01784;PF06886;	IPR002678;IPR036069;IPR027329;	A0A0W0F5B4	KTB31428.1	Eukaryota	Moniliophthora roreri	TPX2 domain-containing protein	WG66_15991	pfam06886	Targeting protein for Xklp2 (TPX2)	COG0327;COG3323;
Heme-containing mono-oxygenase	Cytochrome P450	UniProt Fam - pfam/interpro	Conditional, singleton	NA	PF01784;PF00067;	IPR001128;IPR036396;IPR002678;IPR036069;	A0A4Y9ZJE9	TFY73981.1	Eukaryota	Hericium alpestre	Uncharacterized protein	EWM64_g10031	cd11065	cytochrome P450 family 64-like fungal cytochrome P450s; homomethionine N-hydroxylase (PLN03018)	COG3323;COG0327;
EF-hand pair	EF-hand pair	UniProt Fam - pfam/interpro	Valid, conditional	NA	PF13499;PF01784;	IPR011992;IPR018247;IPR002048;IPR002678;IPR036069;	A0A4U5VMZ5	TKS89874.1	Eukaryota	Collichthys lucidus	NIF3-like protein 1	D9C73_024003	COG5126	Ca2+-binding protein, EF-hand superfamily	COG0327;COG3323;COG5054;COG5126;
Transporter/membrane component	Type II secretion system protein GspE-like, N-terminal superfamily	UniProt Fam - pfam/interpro	Invalid	NA	PF01784;	IPR002678;IPR036069;IPR015867;IPR037257;	A0A645CGF9	MPM76024.1	Bacteria	bioreactor metagenome	Uncharacterized protein	SDC9_123019	NA	NA	COG3323;COG0327;COG1406;
CIAO1/Cia1	WD40 repeat	UniProt Fam - pfam/interpro	Valid, conditional	NA	PF01784;	IPR002678;IPR036069;IPR015943;IPR001680;IPR017986;IPR036322;	A0A423U835	ROT84821.1	Eukaryota	Penaeus vannamei	Putative GTP cyclohydrolase 1 type 2 NIF3L1	C7M84_021984	COG2319	anaphase-promoting complex binding	COG0327;COG3323;COG2319;
Recombination	TOPRIM domain	UniProt Fam - pfam/interpro	Invalid	NA	PF01784;	IPR002678;IPR036069;IPR017221;IPR015867;IPR006171;	A0A357BCY7	HBR12079.1	Bacteria	Chryseobacterium sp.	GTP cyclohydrolase 1 type 2 homolog	DD740_07705	NA	NA	COG3323;COG0327;
Peptidase	Aspartic peptidase, active site	UniProt Fam - pfam/interpro	Invalid	NA	PF01784;	IPR001969;IPR002678;IPR036069;	A0A2N8HDU3	PNC18138.1	Bacteria	Akkermansia muciniphila	Nif3-like dinuclear metal center hexameric protein	CXU22_05740	NA	NA	COG0327;COG3323;
Response regulator	Signal transduction response regulator, receiver domain	UniProt Fam - pfam/interpro	Invalid	NA	PF01784;	IPR002678;IPR036069;IPR017221;IPR015867;IPR001789;	A0A246AEY2	OWK71507.1	Bacteria	Pedobacter sp. AJM	GTP cyclohydrolase 1 type 2 homolog	CBW18_10690	NA	NA	COG3323;COG0327;
Phosphotransferase	Protein kinase C-like, phorbol ester/diacylglycerol-binding domain; Zinc finger phorbol-ester/DAG-type profile	UniProt Fam - pfam/interpro	Inconclusive	NA	PF01784;	IPR002678;IPR036069;IPR002219;	A0A433QFX1	RUS28728.1	Eukaryota	Jimgerdemannia flammicorona	Phorbol-ester/DAG-type domain-containing protein (Fragment)	BC938DRAFT_481525	cd20832	protein kinase C conserved region 1 (C1 domain)	COG0327;COG3323;
Nuclease	AP endonuclease 1, binding site	UniProt Fam - pfam/interpro	Invalid	NA	PF01784;	IPR020847;IPR002678;IPR036069;IPR017221;IPR015867;	A0A1Z5HN40	GAW90933.1	Bacteria	Calderihabitans maritimus	GTP cyclohydrolase 1 type 2 homolog	KKC1_00950	NA	NA	COG3323;COG0327;
Intein (intron protein)	Intein N-terminal splicing region	UniProt Fam - pfam/interpro	Invalid	NA	PF01784;	IPR002678;IPR036069;IPR006141;	V2TZ48	ESK41120.1	Bacteria	Acinetobacter nectaris CIP 110549	YbgI/family dinuclear metal center protein	P256_00108	NA	NA	COG0327;COG3323;
Phosphorylase	Circadian clock protein KaiA, C-terminal	UniProt Fam - pfam/interpro	Invalid	NA	PF01784;	IPR020856;IPR002678;IPR036069;	A0A7C6L9B2	HHV93905.1	Bacteria	Firmicutes bacterium	GTP cyclohydrolase 1 type 2 homolog	GXX47_05130	NA	NA	COG0327;COG3323;
RNA-binding	RNA-binding S4 domain; S4/Hsp/ tRNA synthetase RNA-binding domain	UniProt Fam - pfam/interpro	Inconclusive	NA	PF01784;	IPR002678;IPR036069;IPR002942;	I7K702	CCJ33314.1	Bacteria	Caloramator australicus RC3	GTP cyclohydrolase 1 type 2 homolog	CAAU_1230	COG1187	16S rRNA U516 pseudouridylate synthase RsuA and related 23S rRNA U2605, pseudouridylate synthases	COG0327;COG3323;COG1187;
Peptidase	AmhX-like	UniProt Fam - pfam/interpro	Invalid	NA	PF01784;	IPR037484;IPR002678;IPR036069;	A0A1W9U5N6	OQY16496.1	Bacteria	Desulfobacteraceae bacterium 4572	Uncharacterized protein (Fragment)	B6I36_10150	NA	NA	COG0327;COG3323;
Methyltransferase	SAM-dependent methyltransferase	InterPro exported	Invalid	PF12847 - IPR002678	PF01784;	IPR002678;IPR036069;	A0A3D0NSV7	HCA54922.1	Bacteria	Ruminococcaceae bacterium	GTP cyclohydrolase 1 type 2 homolog	DEO95_05485	NA	NA	COG0327;COG3323;COG2384;
FAD-/NAD-binding	UCP036654	InterPro exported	Valid	PF13450 - IPR003953 - IPR002678	PF01784;PF00890;PF13450;	IPR002678;IPR014614;IPR003953;IPR027477;IPR036069;IPR036188;	A0A7G5JMQ9	QMW36901.1	Eukaryota	Aspergillus flavus	Uncharacterized protein	G4B11_000137	COG3573	steroid biosynthetic process/predicted oxidoreductase	COG3573;COG0327;COG1053;COG3323;COG0029;COG0665;COG3976;COG1232;COG0644;COG1231;COG0654;COG0492;COG3349;COG1635;
RNase H	RNase HI (cd09279)	InterPro exported	Valid	IPR002678 - IPR002156	PF01784;PF13456;	IPR002678;IPR036069;IPR015867;IPR012337;IPR002156;IPR036397;	A0A1V5INW7	OPZ45899.1	Bacteria	Actinobacteria bacterium ADurb.BinA094	RNase H domain-containing protein	BWY94_01030	COG0328	Ribonuclease HI	COG3323;COG0327;COG0328;COG3341;
RNase H	RNase HI (cd09279)	InterPro exported	Invalid	IPR002678 - IPR002156	PF01784;PF13456;	IPR002678;IPR036069;IPR015867;IPR012337;IPR002156;IPR036397;	A0A419GR92	RJQ44926.1	Bacteria	Gaiellales bacterium	RNase H domain-containing protein	C4534_05830	NA	NA	COG3323;COG0327;COG0328;COG3341;
RNase H	RNase HI (cd09279)	InterPro exported	Invalid	IPR002678 - IPR002156	PF01784;PF13456;	IPR002678;IPR036069;IPR015867;IPR012337;IPR002156;IPR036397;	A0A523BTI2	TDA65818.1	Bacteria	Clostridia bacterium	GTP cyclohydrolase 1 type 2 homolog	D9V47_11990	NA	NA	COG3323;COG0327;COG0328;COG3341;
RNase H	RNase HI (cd09279)	InterPro exported	Invalid	IPR002678 - IPR002156	PF01784;PF13456;	IPR002678;IPR036069;IPR015867;IPR012337;IPR002156;IPR036397;	A0A7C7DNN8	HHY38103.1	Bacteria	Clostridia bacterium	GTP cyclohydrolase 1 type 2 homolog	GX507_04160	NA	NA	COG3323;COG0327;COG0328;COG3341;
Phosphoesterase	Calcineurin-like phosphoesterase domain, ApaH type	InterPro exported	Invalid	IPR004843 - IPR002678	PF00149;PF01784;	IPR004843;IPR002678;IPR029052;IPR041796;IPR014576;	A0A4Q0VS05	RXI99876.1	Bacteria	Bacillaceae bacterium B16-10	Metallophos domain-containing protein	DS745_13435	NA	NA	COG0420;COG1408;COG2129;COG1407;COG0622;COG0639;COG2908;
Transposase	Transposase IS200-like	InterPro exported	Invalid	IPR002686 - IPR002678	PF01784;PF01797;	IPR002678;IPR002686;IPR036515;	A0A1V6DZ24	OQB94361.1	Bacteria	Verrucomicrobia bacterium ADurb.Bin118	Y1	BWX84_00220	NA	NA	COG1943;
Zinc finger	THAP-type; THAP-type zinc finger	InterPro exported	Valid, conditional	IPR006612 - IPR002678	PF01784;PF05485;	IPR002678;IPR006612;IPR036069;IPR038441;	A0A7E5WP16	XP_026742495.1	Eukaryota	Trichoplusia ni (Cabbage looper)	NIF3-like protein 1 isoform X1	LOC113504423	pfam05485	THAP domain	COG0327;COG3323;
FAD-/NAD-binding	UCP036654	InterPro exported	Valid, conditional	IPR007219 - PF13450 - IPR003953 - IPR002678	PF01784;PF00890;PF04082;PF13450;	IPR002678;IPR014614;IPR003953;IPR007219;IPR036069;IPR036188;	A0A7G5INF9	QMW24901.1	Eukaryota	Aspergillus flavus (strain ATCC 200026 / FGSC A1120 / NRRL 3357 / JCM 12722 / SRRC 167)	Uncharacterized protein	G4B84_000146	COG3573;pfam04082	steroid biosynthetic process/predicted oxidoreductase; Fungal specific transcription factor domain	COG3573;COG0327;COG1053;COG3323;COG0665;COG0029;COG3976;COG1232;COG1231;COG0644;COG0492;COG0654;COG3349;COG1635;COG2072;COG2509;
Vps51/Vps67		InterPro exported	Invalid	PF08700 - IPR002678	PF01784;	IPR002678;IPR036069;	A0A366R6D8	RBR12721.1	Eukaryota	Gibberella moniliformis (Maize ear and stalk rot fungus)	Uncharacterized protein	FVER53590_04993	NA	NA	COG0327;COG3323;
CIAO1/Cia1	WD40 repeat	InterPro exported	Invalid	IPR001680 - IPR001680 - IPR001680 - IPR001680 - IPR001680 - IPR002678 - IPR002678	PF01784;PF00400;	IPR002678;IPR028608;IPR017986;IPR015943;IPR036069;IPR036322;IPR001680;IPR019775;	A0A7E4REF5	CLEC001396	Eukaryota	Cimex lectularius (Bed bug)	Uncharacterized protein	ClecH1:Scaffold5	NA	NA	COG2319;COG0327;COG4916;COG3323;COG4946;
HAD-like	HAD hydrolase, subfamily IA	InterPro exported	Invalid	IPR041492 - IPR002678	PF13419;PF01784;	IPR002678;IPR036412;IPR006439;IPR041492;IPR023214;	A0A388TE31	GBR74780.1	Eukaryota	Candidatus Termititenax aidoneus	Haloacid dehalogenase superfamily hydrolase	NO1_1901	NA	NA	COG0546;COG0327;COG0637;COG1339;COG3323;COG1011;COG0241;COG2179;

## Sheet: c
Fusion Classes (unique)	Counts	Valid, counts	Valid, conditional	Conditional	Conditional, singleton	Total	Fusion Subclasses (unique)	Counts	Valid, counts	Valid, conditional	Conditional	Conditional, singleton	Total
RNase H	5	1	0	0	0	1	NUDIX hydrolase domain	2	1	1	0	0	2
NUDIX hydrolase	2	1	1	0	0	2	WD40 repeat	14	12	1	0	0	13
CIAO1/Cia1	14	12	1	0	0	13	Histone acetyltransferase	3	3	0	0	0	3
Acetyltransferase	6	3	0	0	0	3	GNAT family N-acetyltransferase	3	0	0	0	0	0
Pterin-binding	2	0	0	0	0	0	UCP036654; FAD binding domain-containing flavoprotein	13	13	0	0	0	13
FAD-/NAD-binding	16	14	2	0	0	16	PAS: Per - period circadian protein; Arnt - Ah receptor nuclear translocator protein; Sim - single-minded protein	4	0	0	0	0	0
TAT signal	76	60	0	0	0	60	Thiosulfate sulfurtransferase	2	0	0	2	0	2
Ankyrin repeat	8	0	0	0	0	0	SAM-dependent methyltransferase	21	11	0	0	0	11
PI3K accessory	3	0	0	0	0	0	RING-type	2	2	0	0	0	2
PAS	4	0	0	0	0	0	nucleotide-binding active site	4	0	0	0	0	0
Rhodanese	2	0	0	2	0	2	Conserved oligomeric Golgi complex subunit 6 (COG6)	2	0	0	0	0	0
Methyltransferase	23	11	1	0	0	12	VAMP, SNARE	4	0	0	0	0	0
Zinc finger	5	2	3	0	0	5	N-reg	2	2	0	0	0	2
ATPase	4	0	0	0	0	0	ATP phosphoribosyltransferase HisG; Histidinol dehydrogenase; Sulphate adenylyltransferase; Adenylyl-sulfate kinase	1	0	0	0	0	0
COG6	2	0	0	0	0	0	NADH-ubiquinone oxidoreductase; Acetyl-CoA carboxylase, biotin carboxylase	1	0	0	0	0	0
Longin	4	0	0	0	0	0	Transcription factor, T-box	1	0	0	0	0	0
Nitrogen regulatory protein PII	2	2	0	0	0	2	tRNA methyltransferase TrmK	1	0	1	0	0	1
Transferase	2	0	0	0	1	1	EF-hand pair	2	0	2	0	0	2
Oxidoreductase	1	0	0	0	0	0	Alpha-D-phosphohexomutase, alpha/beta/alpha I/II/III	1	0	0	0	0	0
Response regulator	5	0	1	0	0	1	Nur1/Mug154	1	0	0	0	0	0
EF-hand pair	2	0	2	0	0	2	Histidine phosphatase superfamily, clade-1	1	0	0	0	0	0
Phosphohexomutase	1	0	0	0	0	0	Transcription factor Skn7	1	0	0	0	0	0
Uncharacterized	4	0	0	0	0	0	RING/FYVE/PHD-type	2	0	2	0	0	2
Phosphatase	1	0	0	0	0	0	Protein-tyrosine phosphatase-like; Dual specificity protein phosphatase domain; Kelch-type beta propeller; BTB/POZ domain	1	0	1	0	0	1
Tyrosine phosphatase	3	0	3	0	0	3	Protein-tyrosine phosphatase-like; Dual specificity protein phosphatase domain	2	0	2	0	0	2
Dehydrogenase	1	0	0	0	0	0	Short-chain dehydrogenase/reductase SDR	1	0	0	0	0	0
Peptidase	4	0	0	0	0	0	Metalloenzyme, LuxS/M16 peptidase-like	1	0	0	0	0	0
Cyclophilin-like	3	0	2	0	0	2	Cyclophilin-like domain superfamily; Cyclophilin TM1367-like domain	1	0	0	0	0	0
Transporter/membrane component	3	0	0	0	0	0	Solute-binding protein family 5	1	0	0	0	0	0
DNA-binding	1	0	0	0	0	0	mRNA (guanine-N(7))-methyltransferase domain	1	0	0	0	0	0
Hydrolase	1	0	0	0	0	0	KipI family; Carboxyltransferase domain, subdomain A and B; LamB/YcsF/PxpA-like	1	0	1	0	0	1
rRNA	1	0	0	0	0	0	Peptidase M20B, tripeptide aminopeptidase	1	0	0	0	0	0
Viral protein	1	0	0	0	0	0	UCP036654; Transcription factor domain, fungi	1	0	1	0	0	1
Isomerase	1	0	0	0	0	0	Histone H2A	1	0	0	0	0	0
Synthase	1	0	0	0	0	0	BolA protein	1	0	1	0	0	1
Kinesin-like	1	0	0	0	0	0	Fumarylacetoacetase-like, C-terminal domain superfamily	1	0	0	0	0	0
Heme-containing mono-oxygenase	1	0	0	0	1	1	23S rRNA-intervening sequence protein	1	0	0	0	0	0
Recombination	1	0	0	0	0	0	Flavivirus non-structural protein NS4B	1	0	0	0	0	0
Phosphotransferase	1	0	0	0	0	0	Sugar isomerase (SIS)	1	0	0	0	0	0
Nuclease	1	0	0	0	0	0	Spore germination GerAC	1	0	0	0	0	0
Intein (intron protein)	1	0	0	0	0	0	Pyridoxal phosphate-dependent transferase, major domain; Aminotransferase, class I/classII	1	0	0	0	1	1
Phosphorylase	1	0	0	0	0	0	Bacillithiol biosynthesis BshC	1	0	0	0	0	0
RNA-binding	1	0	0	0	0	0	Citrate synthase	1	0	0	0	0	0
Phosphoesterase	1	0	0	0	0	0	Mitochondrial import inner membrane translocase subunit Tim54	1	0	0	0	0	0
Transposase	1	0	0	0	0	0	KipI family; Carboxyltransferase domain, subdomain A and B	1	0	1	0	0	1
Vps51/Vps67	1	0	0	0	0	0	Chromatin modification-related protein Eaf7/MRGBP	1	0	0	0	0	0
HAD-like	1	0	0	0	0	0	Heterokaryon incompatibility (WD40 repeat subtype)	1	0	0	0	0	0
	0	0	0	0	0	0	TPX2, C-terminal	1	0	0	0	0	0
	0	0	0	0	0	0	Cytochrome P450	1	0	0	0	1	1
	0	0	0	0	0	0	Type II secretion system protein GspE-like, N-terminal superfamily	1	0	0	0	0	0
	0	0	0	0	0	0	TOPRIM domain	1	0	0	0	0	0
	0	0	0	0	0	0	Aspartic peptidase, active site	1	0	0	0	0	0
	0	0	0	0	0	0	Signal transduction response regulator, receiver domain	1	0	0	0	0	0
	0	0	0	0	0	0	Protein kinase C-like, phorbol ester/diacylglycerol-binding domain; Zinc finger phorbol-ester/DAG-type profile	1	0	0	0	0	0
	0	0	0	0	0	0	AP endonuclease 1, binding site	1	0	0	0	0	0
	0	0	0	0	0	0	Intein N-terminal splicing region	1	0	0	0	0	0
	0	0	0	0	0	0	Circadian clock protein KaiA, C-terminal	1	0	0	0	0	0
	0	0	0	0	0	0	RNA-binding S4 domain; S4/Hsp/ tRNA synthetase RNA-binding domain	1	0	0	0	0	0
	0	0	0	0	0	0	AmhX-like	1	0	0	0	0	0
	0	0	0	0	0	0	UCP036654	2	1	1	0	0	2
	0	0	0	0	0	0	RNase HI (cd09279)	4	1	0	0	0	1
	0	0	0	0	0	0	Calcineurin-like phosphoesterase domain, ApaH type	1	0	0	0	0	0
	0	0	0	0	0	0	Transposase IS200-like	1	0	0	0	0	0
	0	0	0	0	0	0	THAP-type; THAP-type zinc finger	1	0	1	0	0	1
	0	0	0	0	0	0	HAD hydrolase, subfamily IA	1	0	0	0	0	0
	0	0	0	0	0	0		0	0	0	0	0	0
	0	0	0	0	0	0		0	0	0	0	0	0
	0	0	0	0	0	0		0	0	0	0	0	0
	0	0	0	0	0	0		0	0	0	0	0	0
	0	0	0	0	0	0		0	0	0	0	0	0
	0	0	0	0	0	0		0	0	0	0	0	0
	0	0	0	0	0	0		0	0	0	0	0	0
	0	0	0	0	0	0		0	0	0	0	0	0
								0	0	0	0	0	0
								0	0	0	0	0	0
								0	0	0	0	0	0
								0	0	0	0	0	0
								0	0	0	0	0	0
								0	0	0	0	0	0
								0	0	0	0	0	0
								0	0	0	0	0	0
								0	0	0	0	0	0
								0	0	0	0	0	0
								0	0	0	0	0	0
								0	0	0	0	0	0
								0	0	0	0	0	0
								0	0	0	0	0	0
								0	0	0	0	0	0
								0	0	0	0	0	0
								0	0	0	0	0	0
								0	0	0	0	0	0
								0	0	0	0	0	0
								0	0	0	0	0	0
								0	0	0	0	0	0
								0	0	0	0	0	0
								0	0	0	0	0	0
