# Supplementary material for: Comparative Genomic Analysis of the DUF34 Protein Family Suggests Role as a Metal Ion Chaperone or Insertase
Source: Preprints.org preprint supplement (doi:10.20944/preprints202107.0280.v1), 2021-07-13
Supplement: Supplementary file 4 [file Data Table 12.xlsx]

## Sheet: Content
Data Table 12		Reed, et al., 2021
STRING network export generated following the results of Data Table 10; nodes transferred from g:Profiler output of ProteomeHD data for H. sapiens DUF34 homolog, NIF3L1:
a	Network data
b	Annotations per node
c	Values

## Sheet: a
#node	identifier	x_position	y_position	color	annotation
ABI3	9606.ENSP00000225941	0.833562	0.381611	rgb(117,239,178)	ABI gene family member 3; May inhibit tumor metastasis (By similarity). In vitro, reduces cell motility; Belongs to the ABI family
ACAP1	9606.ENSP00000158762	0.276712	0.75605	rgb(137,239,117)	Arf-GAP with coiled-coil, ANK repeat and PH domain-containing protein 1; GTPase-activating protein (GAP) for ADP ribosylation factor 6 (ARF6) required for clathrin-dependent export of proteins from recycling endosomes to trans-Golgi network and cell surface. Required for regulated export of ITGB1 from recycling endosomes to the cell surface and ITGB1-dependent cell migration; Ankyrin repeat domai…
AIMP1	9606.ENSP00000378191	0.643836	0.488069	rgb(117,144,239)	Aminoacyl tRNA synthase complex-interacting multifunctional protein 1; Non-catalytic component of the multisynthase complex. Stimulates the catalytic activity of cytoplasmic arginyl-tRNA synthase. Binds tRNA. Possesses inflammatory cytokine activity. Negatively regulates TGF-beta signaling through stabilization of SMURF2 by binding to SMURF2 and inhibiting its SMAD7-mediated degradation. Involved…
ANAPC10	9606.ENSP00000478501	0.632192	0.555982	rgb(117,163,239)	Anaphase-promoting complex subunit 10; Component of the anaphase promoting complex/cyclosome (APC/C), a cell cycle-regulated E3 ubiquitin ligase that controls progression through mitosis and the G1 phase of the cell cycle. The APC/C complex acts by mediating ubiquitination and subsequent degradation of target proteins: it mainly mediates the formation of 'Lys-11'-linked polyubiquitin chains and, …
ARHGEF6	9606.ENSP00000250617	0.367123	0.828246	rgb(150,101,255)	Rho guanine nucleotide exchange factor 6; Acts as a RAC1 guanine nucleotide exchange factor (GEF); Pleckstrin homology domain containing
C10orf32	9606.ENSP00000342331	0.868493	0.638579	rgb(117,213,239)	BLOC-1-related complex subunit 7; As part of the BORC complex may play a role in lysosomes movement and localization at the cell periphery. Associated with the cytosolic face of lysosomes, the BORC complex may recruit ARL8B and couple lysosomes to microtubule plus-end-directed kinesin motor; Belongs to the BORCS7 family
C17orf85	9606.ENSP00000373657	0.243836	0.814786	rgb(239,217,117)	Nuclear cap-binding protein subunit 3; Associates with NCBP1/CBP80 to form an alternative cap- binding complex (CBC) which plays a key role in mRNA export. NCBP3 serves as adapter protein linking the capped RNAs (m7GpppG-capped RNA) to NCBP1/CBP80. Unlike the conventional CBC with NCBP2 which binds both small nuclear RNA (snRNA) and messenger (mRNA) and is involved in their export from the nucleu…
CCDC93	9606.ENSP00000365477	0.787671	0.7793	rgb(237,239,117)	Coiled-coil domain-containing protein 93; Involved in copper-dependent ATP7A trafficking between the trans-Golgi network and vesicles in the cell periphery; the function is proposed to depend on its association within the CCC complex and cooperation with the WASH complex on early endosomes and is dependent on its interaction with WASHC2C
CENPC	9606.ENSP00000273853	0.40411	0.67896	rgb(117,231,239)	Centromere protein C; Component of the CENPA-NAC (nucleosome-associated) complex, a complex that plays a central role in assembly of kinetochore proteins, mitotic progression and chromosome segregation. The CENPA-NAC complex recruits the CENPA-CAD (nucleosome distal) complex and may be involved in incorporation of newly synthesized CENPA into centromeres. CENPC recruits DNA methylation and DNMT3B…
CEPT1	9606.ENSP00000441980	0.342466	0.22743	rgb(117,188,239)	Choline/ethanolaminephosphotransferase 1; Catalyzes both phosphatidylcholine and phosphatidylethanolamine biosynthesis from CDP-choline and CDP- ethanolamine, respectively. Involved in protein-dependent process of phospholipid transport to distribute phosphatidyl choline to the lumenal surface. Has a higher cholinephosphotransferase activity than ethanolaminephosphotransferase activity; Belongs t…
CLEC16A	9606.ENSP00000387122	0.323288	0.801937	rgb(218,239,117)	Protein CLEC16A; Regulator of mitophagy through the upstream regulation of the RNF41/NRDP1-PRKN pathway. Mitophagy is a selective form of autophagy necessary for mitochondrial quality control. The RNF41/NRDP1-PRKN pathway regulates autophagosome-lysosome fusion during late mitophagy. May protect RNF41/NRDP1 from proteosomal degradation, RNF41/NRDP1 which regulates proteosomal degradation of PRKN.…
CNOT11	9606.ENSP00000289382	0.850685	0.176037	rgb(239,192,117)	CCR4-NOT transcription complex subunit 11; Component of the CCR4-NOT complex which is one of the major cellular mRNA deadenylases and is linked to various cellular processes including bulk mRNA degradation, miRNA-mediated repression, translational repression during translational initiation and general transcription regulation. Additional complex functions may be a consequence of its influence on …
COMMD1	9606.ENSP00000308236	0.662329	0.715058	rgb(239,148,117)	COMM domain-containing protein 1; Proposed scaffold protein that is implicated in diverse physiological processes and whose function may be in part linked to its ability to regulate ubiquitination of specific cellular proteins. Can modulate activity of cullin-RING E3 ubiquitin ligase (CRL) complexes by displacing CAND1; in vitro promotes CRL E3 activity and dissociates CAND1 from CUL1 and CUL2. P…
COMMD10	9606.ENSP00000274458	0.69863	0.727294	rgb(212,239,117)	COMM domain-containing protein 10; May modulate activity of cullin-RING E3 ubiquitin ligase (CRL) complexes. May down-regulate activation of NF-kappa-B
COMMD5	9606.ENSP00000394331	0.734932	0.691808	rgb(117,117,239)	COMM domain-containing protein 5; May modulate activity of cullin-RING E3 ubiquitin ligase (CRL) complexes. Negatively regulates cell proliferation. Negatively regulates cell cycle G2/M phase transition probably by transactivating p21/CDKN1A through the p53/TP53-independent signaling pathway. Involved in kidney proximal tubule morphogenesis (By similarity). Down-regulates activation of NF-kappa-B…
COMMD7	9606.ENSP00000278980	0.758219	0.663664	rgb(117,239,122)	COMM domain-containing protein 7; May modulate activity of cullin-RING E3 ubiquitin ligase (CRL) complexes. Associates with the NF-kappa-B complex and suppresses its transcriptional activity
COPS6	9606.ENSP00000304102	0.69863	0.617165	rgb(239,142,117)	COP9 signalosome complex subunit 6; Component of the COP9 signalosome complex (CSN), a complex involved in various cellular and developmental processes. The CSN complex is an essential regulator of the ubiquitin (Ubl) conjugation pathway by mediating the deneddylation of the cullin subunits of SCF-type E3 ligase complexes, leading to decrease the Ubl ligase activity of SCF-type complexes such as …
EIF3G	9606.ENSP00000253108	0.544521	0.445853	rgb(239,211,117)	Eukaryotic translation initiation factor 3 subunit G; RNA-binding component of the eukaryotic translation initiation factor 3 (eIF-3) complex, which is required for several steps in the initiation of protein synthesis. The eIF-3 complex associates with the 40S ribosome and facilitates the recruitment of eIF-1, eIF-1A, eIF-2:GTP:methionyl-tRNAi and eIF-5 to form the 43S pre- initiation complex (43…
ELP6	9606.ENSP00000296149	0.373973	0.6655	rgb(117,239,228)	Elongator complex protein 6; Acts as subunit of the RNA polymerase II elongator complex, which is a histone acetyltransferase component of the RNA polymerase II (Pol II) holoenzyme and is involved in transcriptional elongation. Elongator may play a role in chromatin remodeling and is involved in acetylation of histones H3 and probably H4. Involved in cell migration
EMC7	9606.ENSP00000256545	0.738356	0.431781	rgb(117,239,222)	ER membrane protein complex subunit 7
FUBP3	9606.ENSP00000318177	0.220548	0.301462	rgb(117,239,135)	Far upstream element-binding protein 3; May interact with single-stranded DNA from the far- upstream element (FUSE). May activate gene expression
GOSR2	9606.ENSP00000225567	0.488356	0.765228	rgb(130,239,117)	Golgi SNAP receptor complex member 2; Involved in transport of proteins from the cis/medial- Golgi to the trans-Golgi network; Belongs to the GOSR2 family
GTF2A1	9606.ENSP00000452454	0.15137	0.709551	rgb(239,154,117)	Transcription initiation factor IIA subunit 1; TFIIA is a component of the transcription machinery of RNA polymerase II and plays an important role in transcriptional activation. TFIIA in a complex with TBP mediates transcriptional activity; Belongs to the TFIIA subunit 1 family
GUK1	9606.ENSP00000355689	0.594521	0.762169	rgb(117,117,239)	Guanylate kinase; Essential for recycling GMP and indirectly, cGMP
HNRNPK	9606.ENSP00000365439	0.408219	0.417097	rgb(117,239,166)	Heterogeneous nuclear ribonucleoprotein K; One of the major pre-mRNA-binding proteins. Binds tenaciously to poly(C) sequences. Likely to play a role in the nuclear metabolism of hnRNAs, particularly for pre-mRNAs that contain cytidine-rich sequences. Can also bind poly(C) single- stranded DNA. Plays an important role in p53/TP53 response to DNA damage, acting at the level of both transcription ac…
HPS3	9606.ENSP00000296051	0.835616	0.315534	rgb(162,239,117)	Hermansky-Pudlak syndrome 3 protein; Involved in early stages of melanosome biogenesis and maturation; Biogenesis of lysosomal organelles complex 2
HSPA6	9606.ENSP00000310219	0.332877	0.462373	rgb(239,236,117)	Heat shock 70 kDa protein 6; Molecular chaperone implicated in a wide variety of cellular processes, including protection of the proteome from stress, folding and transport of newly synthesized polypeptides, activation of proteolysis of misfolded proteins and the formation and dissociation of protein complexes. Plays a pivotal role in the protein quality control system, ensuring the correct foldi…
INTS12	9606.ENSP00000415433	0.0794521	0.711999	rgb(155,239,117)	Integrator complex subunit 12; Component of the Integrator complex, a complex involved in the small nuclear RNAs (snRNA) U1 and U2 transcription and in their 3'-box-dependent processing. The Integrator complex is associated with the C-terminal domain (CTD) of RNA polymerase II largest subunit (POLR2A) and is recruited to the U1 and U2 snRNAs genes. Mediates recruitment of cytoplasmic dynein to th…
IRF3	9606.ENSP00000471896	0.218493	0.687525	rgb(239,204,117)	Interferon regulatory factor 3; Key transcriptional regulator of type I interferon (IFN)-dependent immune responses which plays a critical role in the innate immune response against DNA and RNA viruses. Regulates the transcription of type I IFN genes (IFN-alpha and IFN-beta) and IFN-stimulated genes (ISG) by binding to an interferon-stimulated response element (ISRE) in their promoters. Acts as a…
ITSN2	9606.ENSP00000347244	0.868493	0.697315	rgb(117,239,191)	Intersectin-2; Adapter protein that may provide indirect link between the endocytic membrane traffic and the actin assembly machinery. May regulate the formation of clathrin-coated vesicles (CCPs). Seems to be involved in CCPs maturation including invagination or budding. Involved in endocytosis of integrin beta-1 (ITGB1) and transferrin receptor (TFR). Plays a role in dendrite formation by melan…
KCMF1	9606.ENSP00000386738	0.368493	0.724235	rgb(230,239,117)	E3 ubiquitin-protein ligase KCMF1; Has intrinsic E3 ubiquitin ligase activity and promotes ubiquitination; Belongs to the KCMF1 family
KIAA1033	9606.ENSP00000484713	0.845205	0.834364	rgb(255,175,101)	WASH complex subunit 4; Acts at least in part as component of the WASH core complex whose assembly at the surface of endosomes seems to inhibit WASH nucleation-promoting factor (NPF) activity in recruiting and activating the Arp2/3 complex to induce actin polymerization, and which is involved in the regulation of the fission of tubules that serve as transport intermediates during endosome sorting
KIAA2013	9606.ENSP00000365756	0.508904	0.156458	rgb(117,169,239)	Uncharacterized protein KIAA2013; KIAA2013
KRTCAP2	9606.ENSP00000295682	0.774658	0.357138	rgb(117,219,239)	Keratinocyte-associated protein 2; Acts as accessory component of the N-oligosaccharyl transferase (OST) complex which catalyzes the transfer of a high mannose oligosaccharide from a lipid-linked oligosaccharide donor to an asparagine residue within an Asn-X-Ser/Thr consensus motif in nascent polypeptide chains. Required for efficient substrate- specific N-glycosylation probably involving the STT…
LSM12	9606.ENSP00000466718	0.335616	0.266587	rgb(117,238,239)	LSM12 homolog
LSM5	9606.ENSP00000410758	0.371918	0.335724	rgb(239,136,117)	U6 snRNA-associated Sm-like protein LSm5; Plays a role in U6 snRNP assembly and function. Binds to the 3' end of U6 snRNA, thereby facilitating formation of the spliceosomal U4/U6 duplex formation in vitro; LSm proteins
LSM6	9606.ENSP00000422392	0.443151	0.326547	rgb(117,239,147)	U6 snRNA-associated Sm-like protein LSm6; Component of LSm protein complexes, which are involved in RNA processing and may function in a chaperone-like manner, facilitating the efficient association of RNA processing factors with their substrates. Component of the cytoplasmic LSM1-LSM7 complex, which is thought to be involved in mRNA degradation by activating the decapping step in the 5'-to-3' mR…
LSM7	9606.ENSP00000252622	0.35274	0.363868	rgb(117,239,210)	U6 snRNA-associated Sm-like protein LSm7; Binds specifically to the 3'-terminal U-tract of U6 snRNA and is probably a component of the spliceosome; Belongs to the snRNP Sm proteins family
MED11	9606.ENSP00000293777	0.871918	0.492352	rgb(239,186,117)	Mediator of RNA polymerase II transcription subunit 11; Component of the Mediator complex, a coactivator involved in the regulated transcription of nearly all RNA polymerase II-dependent genes. Mediator functions as a bridge to convey information from gene-specific regulatory proteins to the basal RNA polymerase II transcription machinery. Mediator is recruited to promoters by direct interactions…
MED30	9606.ENSP00000297347	0.809589	0.516213	rgb(117,156,239)	Mediator of RNA polymerase II transcription subunit 30; Component of the Mediator complex, a coactivator involved in the regulated transcription of nearly all RNA polymerase II-dependent genes. Mediator functions as a bridge to convey information from gene-specific regulatory proteins to the basal RNA polymerase II transcription machinery. Mediator is recruited to promoters by direct interactions…
MIEN1	9606.ENSP00000377778	0.776712	0.245785	rgb(117,225,239)	Migration and invasion enhancer 1; Increases cell migration by inducing filopodia formation at the leading edge of migrating cells. Plays a role in regulation of apoptosis, possibly through control of CASP3. May be involved in a redox-related process; Belongs to the SelWTH family
MKRN2	9606.ENSP00000170447	0.477397	0.821516	rgb(239,129,117)	Probable E3 ubiquitin-protein ligase makorin-2; E3 ubiquitin ligase catalyzing the covalent attachment of ubiquitin moieties onto substrate proteins; Ring finger proteins
MRPL34	9606.ENSP00000252602	0.666438	0.292896	rgb(255,0,0)	Mitochondrial ribosomal protein L34; Belongs to the bacterial ribosomal protein bL34 family
MRPS10	9606.ENSP00000053468	0.563014	0.311863	rgb(117,239,141)	Mitochondrial ribosomal protein S10; Belongs to the universal ribosomal protein uS10 family
MRPS24	9606.ENSP00000318158	0.636986	0.252515	rgb(224,239,117)	Mitochondrial ribosomal protein S24; Belongs to the universal ribosomal protein uS3 family
NAA10	9606.ENSP00000417763	0.449315	0.634908	rgb(117,239,197)	N-alpha-acetyltransferase 10; Catalytic subunit of the N-terminal acetyltransferase A (NatA) complex which displays alpha (N-terminal) acetyltransferase activity. Acetylates amino termini that are devoid of initiator methionine. The alpha (N-terminal) acetyltransferase activity may be important for vascular, hematopoietic and neuronal growth and development. Without NAA15, displays epsilon (inter…
NAA20	9606.ENSP00000335636	0.408904	0.738919	rgb(117,206,239)	N-alpha-acetyltransferase 20; Catalytic subunit of the NatB complex which catalyzes acetylation of the N-terminal methionine residues of peptides beginning with Met-Asp, Met-Glu, Met-Asn and Met-Gln. Proteins with cell cycle functions are overrepresented in the pool of NatB substrates. Required for maintaining the structure and function of actomyosin fibers and for proper cellular migration; Belo…
NDUFAF3	9606.ENSP00000323076	0.562329	0.202345	rgb(168,239,117)	NADH dehydrogenase [ubiquinone] 1 alpha subcomplex assembly factor 3; Essential factor for the assembly of mitochondrial NADH:ubiquinone oxidoreductase complex (complex I)
NEDD1	9606.ENSP00000451211	0.183562	0.535792	rgb(239,117,117)	Protein NEDD1; Required for mitosis progression. Promotes the nucleation of microtubules from the spindle; WD repeat domain containing
NFKB1	9606.ENSP00000226574	0.44726	0.606152	rgb(117,181,239)	Nuclear factor NF-kappa-B p105 subunit; NF-kappa-B is a pleiotropic transcription factor present in almost all cell types and is the endpoint of a series of signal transduction events that are initiated by a vast array of stimuli related to many biological processes such as inflammation, immunity, differentiation, cell growth, tumorigenesis and apoptosis. NF-kappa-B is a homo- or heterodimeric co…
NIF3L1	9606.ENSP00000386394	0.25137	0.708939	rgb(187,239,117)	NIF3-like protein 1; May function as a transcriptional corepressor through its interaction with COPS2, negatively regulating the expression of genes involved in neuronal differentiation
NOP10	9606.ENSP00000332198	0.524658	0.264752	rgb(117,117,239)	H/ACA ribonucleoprotein complex subunit 3; Required for ribosome biogenesis and telomere maintenance. Part of the H/ACA small nucleolar ribonucleoprotein (H/ACA snoRNP) complex, which catalyzes pseudouridylation of rRNA. This involves the isomerization of uridine such that the ribose is subsequently attached to C5, instead of the normal N1. Each rRNA can contain up to 100 pseudouridine ("psi") re…
NSMCE1	9606.ENSP00000355077	0.5	0.350408	rgb(117,150,239)	Non-structural maintenance of chromosomes element 1 homolog; Component of the SMC5-SMC6 complex, a complex involved in DNA double-strand breaks by homologous recombination. The complex may promote sister chromatid homologous recombination by recruiting the SMC1-SMC3 cohesin complex to double-strand breaks. The complex is required for telomere maintenance via recombination in ALT (alternative leng…
NUDT16	9606.ENSP00000422375	0.210959	0.374269	rgb(180,239,117)	U8 snoRNA-decapping enzyme; RNA-binding and decapping enzyme that catalyzes the cleavage of the cap structure of snoRNAs and mRNAs in a metal- dependent manner. Part of the U8 snoRNP complex that is required for the accumulation of mature 5.8S and 28S rRNA. Has diphosphatase activity and removes m7G and/or m227G caps from U8 snoRNA and leaves a 5'monophosphate on the RNA. Catalyzes also the cleav…
NUMA1	9606.ENSP00000377298	0.193151	0.584126	rgb(239,198,117)	Nuclear mitotic apparatus protein 1; Microtubule (MT)-binding protein that plays a role in the formation and maintenance of the spindle poles and the alignement and the segregation of chromosomes during mitotic cell division. Functions to tether the minus ends of MTs at the spindle poles, which is critical for the establishment and maintenance of the spindle poles. Plays a role in the establishme…
NUTF2	9606.ENSP00000219169	0.34863	0.614106	rgb(117,117,239)	Nuclear transport factor 2; Mediates the import of GDP-bound RAN from the cytoplasm into the nucleus which is essential for the function of RAN in cargo receptor-mediated nucleocytoplasmic transport. Thereby, plays indirectly a more general role in cargo receptor-mediated nucleocytoplasmic transport. Interacts with GDP-bound RAN in the cytosol, recruits it to the nuclear pore complex via its inte…
PFDN1	9606.ENSP00000261813	0.378767	0.518661	rgb(239,223,117)	Prefoldin subunit 1; Binds specifically to cytosolic chaperonin (c-CPN) and transfers target proteins to it. Binds to nascent polypeptide chain and promotes folding in an environment in which there are many competing pathways for nonnative proteins; Prefoldin subunits
PFDN6	9606.ENSP00000378563	0.415753	0.511319	rgb(0,178,157)	Prefoldin subunit 6; Binds specifically to cytosolic chaperonin (c-CPN) and transfers target proteins to it. Binds to nascent polypeptide chain and promotes folding in an environment in which there are many competing pathways for nonnative proteins; Prefoldin subunits
PIH1D1	9606.ENSP00000262265	0.210274	0.429946	rgb(117,239,185)	PIH1 domain-containing protein 1; Involved in the assembly of C/D box small nucleolar ribonucleoprotein (snoRNP) particles. Recruits the SWI/SNF complex to the core promoter of rRNA genes and enhances pre-rRNA transcription. Mediates interaction of TELO2 with the R2TP complex which is necessary for the stability of MTOR and SMG1. Positively regulates the assembly and activity of the mTORC1 comple…
PPM1B	9606.ENSP00000282412	0.633562	0.79276	rgb(199,239,117)	Protein phosphatase 1B; Enzyme with a broad specificity. Dephosphorylates CDK2 and CDK6 in vitro. Dephosphorylates PRKAA1 and PRKAA2. Inhibits TBK1-mediated antiviral signaling by dephosphorylating it at 'Ser- 172'. Plays an important role in the termination of TNF-alpha- mediated NF-kappa-B activation through dephosphorylating and inactivating IKBKB/IKKB; Belongs to the PP2C family
PPP1CA	9606.ENSP00000326031	0.256164	0.408532	rgb(117,200,239)	Serine/threonine-protein phosphatase PP1-alpha catalytic subunit; Protein phosphatase that associates with over 200 regulatory proteins to form highly specific holoenzymes which dephosphorylate hundreds of biological targets. Protein phosphatase 1 (PP1) is essential for cell division, and participates in the regulation of glycogen metabolism, muscle contractility and protein synthesis. Involved i…
PSMA1	9606.ENSP00000414359	0.526027	0.544969	rgb(117,175,239)	Proteasome subunit alpha type-1; Component of the 20S core proteasome complex involved in the proteolytic degradation of most intracellular proteins. This complex plays numerous essential roles within the cell by associating with different regulatory particles. Associated with two 19S regulatory particles, forms the 26S proteasome and thus participates in the ATP-dependent degradation of ubiquiti…
PSMA3	9606.ENSP00000216455	0.539041	0.510707	rgb(117,194,239)	Proteasome subunit alpha type-3; Component of the 20S core proteasome complex involved in the proteolytic degradation of most intracellular proteins. This complex plays numerous essential roles within the cell by associating with different regulatory particles. Associated with two 19S regulatory particles, forms the 26S proteasome and thus participates in the ATP-dependent degradation of ubiquiti…
PSMA4	9606.ENSP00000044462	0.489041	0.532733	rgb(117,125,239)	Proteasome subunit alpha type-4; Component of the 20S core proteasome complex involved in the proteolytic degradation of most intracellular proteins. This complex plays numerous essential roles within the cell by associating with different regulatory particles. Associated with two 19S regulatory particles, forms the 26S proteasome and thus participates in the ATP-dependent degradation of ubiquiti…
PSMA6	9606.ENSP00000261479	0.554795	0.574949	rgb(101,199,255)	Proteasome subunit alpha type-6; Component of the 20S core proteasome complex involved in the proteolytic degradation of most intracellular proteins. This complex plays numerous essential roles within the cell by associating with different regulatory particles. Associated with two 19S regulatory particles, forms the 26S proteasome and thus participates in the ATP-dependent degradation of ubiquiti…
PSMA7	9606.ENSP00000359910	0.502055	0.571278	rgb(239,123,117)	Proteasome subunit alpha type-7; Component of the 20S core proteasome complex involved in the proteolytic degradation of most intracellular proteins. This complex plays numerous essential roles within the cell by associating with different regulatory particles. Associated with two 19S regulatory particles, forms the 26S proteasome and thus participates in the ATP-dependent degradation of ubiquiti…
PSMB1	9606.ENSP00000262193	0.586986	0.539463	rgb(239,173,117)	Proteasome subunit beta type-1; Component of the 20S core proteasome complex involved in the proteolytic degradation of most intracellular proteins. This complex plays numerous essential roles within the cell by associating with different regulatory particles. Associated with two 19S regulatory particles, forms the 26S proteasome and thus participates in the ATP-dependent degradation of ubiquitin…
PSMB2	9606.ENSP00000362334	0.521233	0.492964	rgb(178,171,0)	Proteasome subunit beta type-2; Component of the 20S core proteasome complex involved in the proteolytic degradation of most intracellular proteins. This complex plays numerous essential roles within the cell by associating with different regulatory particles. Associated with two 19S regulatory particles, forms the 26S proteasome and thus participates in the ATP-dependent degradation of ubiquitin…
PSMD4	9606.ENSP00000357879	0.542466	0.603093	rgb(117,239,235)	26S proteasome non-ATPase regulatory subunit 4; Component of the 26S proteasome, a multiprotein complex involved in the ATP-dependent degradation of ubiquitinated proteins. This complex plays a key role in the maintenance of protein homeostasis by removing misfolded or damaged proteins, which could impair cellular functions, and by removing proteins whose functions are no longer required. Therefo…
PSMD9	9606.ENSP00000440485	0.538356	0.636744	rgb(118,239,117)	26S proteasome non-ATPase regulatory subunit 9; Acts as a chaperone during the assembly of the 26S proteasome, specifically of the base subcomplex of the PA700/19S regulatory complex (RC). During the base subcomplex assembly is part of an intermediate PSMD9:PSMC6:PSMC3 module, also known as modulator trimer complex; PSMD9 is released during the further base assembly process; PDZ domain containing
PTRHD1	9606.ENSP00000330389	0.810274	0.585962	rgb(124,239,117)	peptidyl-tRNA hydrolase domain containing 1
RPL11	9606.ENSP00000363676	0.659589	0.442794	rgb(117,239,216)	60S ribosomal protein L11; Component of the ribosome, a large ribonucleoprotein complex responsible for the synthesis of proteins in the cell. The small ribosomal subunit (SSU) binds messenger RNAs (mRNAs) and translates the encoded message by selecting cognate aminoacyl- transfer RNA (tRNA) molecules. The large subunit (LSU) contains the ribosomal catalytic site termed the peptidyl transferase c…
RPL37A	9606.ENSP00000418082	0.592466	0.382223	rgb(117,239,160)	Ribosomal protein L37a
RQCD1	9606.ENSP00000273064	0.889041	0.128926	rgb(239,229,117)	CCR4-NOT transcription complex subunit 9; Component of the CCR4-NOT complex which is one of the major cellular mRNA deadenylases and is linked to various cellular processes including bulk mRNA degradation, miRNA-mediated repression, translational repression during translational initiation and general transcription regulation. Additional complex functions may be a consequence of its influence on m…
SCAF11	9606.ENSP00000358374	0.168493	0.463596	rgb(117,119,239)	Protein SCAF11; Plays a role in pre-mRNA alternative splicing by regulating spliceosome assembly; Ring finger proteins
SEC13	9606.ENSP00000373312	0.458904	0.696091	rgb(117,239,153)	Protein SEC13 homolog; Functions as a component of the nuclear pore complex (NPC) and the COPII coat. At the endoplasmic reticulum, SEC13 is involved in the biogenesis of COPII-coated vesicles; Belongs to the WD repeat SEC13 family
SEC61G	9606.ENSP00000388337	0.639726	0.363256	rgb(117,131,239)	Protein transport protein Sec61 subunit gamma; Necessary for protein translocation in the endoplasmic reticulum; Belongs to the SecE/SEC61-gamma family
SMARCC2	9606.ENSP00000267064	0.160959	0.657546	rgb(117,138,239)	SWI/SNF complex subunit SMARCC2; Involved in transcriptional activation and repression of select genes by chromatin remodeling (alteration of DNA-nucleosome topology). Component of SWI/SNF chromatin remodeling complexes that carry out key enzymatic activities, changing chromatin structure by altering DNA-histone contacts within a nucleosome in an ATP-dependent manner. Can stimulate the ATPase act…
SNX6	9606.ENSP00000355217	0.915753	0.902889	rgb(239,179,117)	Sorting nexin-6; Involved in several stages of intracellular trafficking. Interacts with membranes phosphatidylinositol 3,4-bisphosphate and/or phosphatidylinositol 4,5-bisphosphate (Probable). Acts in part as component of the retromer membrane-deforming SNX-BAR subcomplex. The SNX-BAR retromer mediates retrograde transport of cargo proteins from endosomes to the trans-Golgi network (TGN) and is …
SRSF7	9606.ENSP00000325905	0.311644	0.379776	rgb(101,255,163)	Serine/arginine-rich splicing factor 7; Required for pre-mRNA splicing. Can also modulate alternative splicing in vitro. Represses the splicing of MAPT/Tau exon 10. May function as export adapter involved in mRNA nuclear export such as of histone H2A. Binds mRNA which is thought to be transferred to the NXF1-NXT1 heterodimer for export (TAP/NXF1 pathway); enhances NXF1-NXT1 RNA-binding activity. …
TCEB1	9606.ENSP00000478121	0.639726	0.598199	rgb(239,167,117)	Elongin-C; SIII, also known as elongin, is a general transcription elongation factor that increases the RNA polymerase II transcription elongation past template-encoded arresting sites. Subunit A is transcriptionally active and its transcription activity is strongly enhanced by binding to the dimeric complex of the SIII regulatory subunits B and C (elongin BC complex). In embryonic stem cells, th…
TRA2A	9606.ENSP00000297071	0.414384	0.286166	rgb(143,239,117)	Transformer-2 protein homolog alpha; Sequence-specific RNA-binding protein which participates in the control of pre-mRNA splicing
TUBA1C	9606.ENSP00000301072	0.306164	0.591468	rgb(117,117,239)	Tubulin alpha-1C chain; Tubulin is the major constituent of microtubules. It binds two moles of GTP, one at an exchangeable site on the beta chain and one at a non-exchangeable site on the alpha chain; Belongs to the tubulin family
TUBB	9606.ENSP00000339001	0.247945	0.566995	rgb(205,239,117)	Tubulin beta chain; Tubulin is the major constituent of microtubules. It binds two moles of GTP, one at an exchangeable site on the beta chain and one at a non-exchangeable site on the alpha chain; Tubulins
UBE2V2	9606.ENSP00000428209	0.599315	0.609211	rgb(149,239,117)	Ubiquitin-conjugating enzyme E2 variant 2; Has no ubiquitin ligase activity on its own. The UBE2V2/UBE2N heterodimer catalyzes the synthesis of non-canonical poly-ubiquitin chains that are linked through 'Lys-63'. This type of poly-ubiquitination does not lead to protein degradation by the proteasome. Mediates transcriptional activation of target genes. Plays a role in the control of progress thr…
UPF2	9606.ENSP00000348708	0.575342	0.459313	rgb(117,239,172)	Regulator of nonsense transcripts 2; Involved in nonsense-mediated decay (NMD) of mRNAs containing premature stop codons by associating with the nuclear exon junction complex (EJC). Recruited by UPF3B associated with the EJC core at the cytoplasmic side of the nuclear envelope and the subsequent formation of an UPF1-UPF2-UPF3 surveillance complex (including UPF1 bound to release factors at the st…
VBP1	9606.ENSP00000286428	0.455479	0.491128	rgb(0,28,178)	Prefoldin subunit 3; Binds specifically to cytosolic chaperonin (c-CPN) and transfers target proteins to it. Binds to nascent polypeptide chain and promotes folding in an environment in which there are many competing pathways for nonnative proteins; Prefoldin subunits
VMA21	9606.ENSP00000333255	0.5	0.0805914	rgb(174,239,117)	Vacuolar ATPase assembly integral membrane protein VMA21; Required for the assembly of the V0 complex of the vacuolar ATPase (V-ATPase) in the endoplasmic reticulum
VTI1A	9606.ENSP00000376792	0.541096	0.81601	rgb(117,239,203)	Vesicle transport through interaction with t-SNAREs homolog 1A; V-SNARE that mediates vesicle transport pathways through interactions with t-SNAREs on the target membrane. These interactions are proposed to mediate aspects of the specificity of vesicle trafficking and to promote fusion of the lipid bilayers. Involved in vesicular transport from the late endosomes to the trans-Golgi network. Along…
WDR48	9606.ENSP00000307491	0.243836	0.256798	rgb(193,239,117)	WD repeat-containing protein 48; Regulator of deubiquitinating complexes. Acts as a strong activator of USP1 and USP46. Enhances the USP1-mediated deubiquitination of FANCD2; USP1 being almost inactive by itself. Also activates deubiquitinating activity of complexes containing USP12. Docks at the distal end of the USP12 fingers domain and induces a cascade of structural changes leading to the act…
XPO1	9606.ENSP00000384863	0.404795	0.563936	rgb(187,255,101)	Exportin-1; Mediates the nuclear export of cellular proteins (cargos) bearing a leucine-rich nuclear export signal (NES) and of RNAs. In the nucleus, in association with RANBP3, binds cooperatively to the NES on its target protein and to the GTPase RAN in its active GTP-bound form (Ran-GTP). Docking of this complex to the nuclear pore complex (NPC) is mediated through binding to nucleoporins. Upo…
ZBTB8OS	9606.ENSP00000417677	0.560274	0.922468	rgb(117,239,128)	Protein archease; Component of the tRNA-splicing ligase complex required to facilitate the enzymatic turnover of catalytic subunit RTCB. Together with DDX1, acts by facilitating the guanylylation of RTCB, a key intermediate step in tRNA ligation; Belongs to the archease family
ZC3H13	9606.ENSP00000282007	0.90274	0.539463	rgb(14,178,0)	Zinc finger CCCH domain-containing protein 13; Acts as component of the WTAP complex that is involved in RNA processing and cell cycle
ZNF143	9606.ENSP00000379847	0.107534	0.75605	rgb(239,161,117)	Zinc finger protein 143; Transcriptional activator. Activates the gene for selenocysteine tRNA (tRNAsec). Binds to the SPH motif of small nuclear RNA (snRNA) gene promoters. Participates in efficient U6 RNA polymerase III transcription via its interaction with CHD8; Belongs to the GLI C2H2-type zinc-finger protein family

## Sheet: b
#node	identifier	domain_summary_url	annotation	other_names_and_aliases
ABI3	9606.ENSP00000225941	https://smart.embl.de/smart/DDvec.cgi?smart=366:COIL(33|60)+Pfam_Abi_HHR(93|165)+SH3(311|366)+	ABI gene family member 3; May inhibit tumor metastasis (By similarity). In vitro, reduces cell motility; Belongs to the ABI family	51225,AAH07780.1,AB037886,ABI family member 3,ABI family, member 3,ABI gene family member 3,ABI3,ABI3-001,ABI3-002,ABI3-003,ABI3-004,ABI3_HUMAN,AL136709,BAA90667.1,BC007780,C9IZN8,CAB66644.1,CCDS11546,CCDS11546.1,CCDS45725,CCDS45725.1,ENSG00000108798,ENSP00000225941,ENSP00000406651,ENSP00000459171,ENSP00000460776,ENST00000225941,ENST00000419580,ENST00000571035,ENST00000573347,HGNC:29859,HPA017345…
ACAP1	9606.ENSP00000158762	https://smart.embl.de/smart/DDvec.cgi?smart=740:Pfam_BAR_3(5|238)+PH(266|362)+ArfGap(405|527)+ANK(606|635)+ANK(639|668)+ANK(672|702)+	Arf-GAP with coiled-coil, ANK repeat and PH domain-containing protein 1; GTPase-activating protein (GAP) for ADP ribosylation factor 6 (ARF6) required for clathrin-dependent export of proteins from recycling endosomes to trans-Golgi network and cell surface. Required for regulated export of ITGB1 from recycling endosomes to the cell surface and ITGB1-dependent cell migration; Ankyrin repeat domai…	3JUE,3T9K,4CKG,4CKH,4F1P,4NSW,9744,AAH18543.1,AAP88790.1,ACAP1,ACAP1-001,ACAP1-002,ACAP1-003,ACAP1-004,ACAP1-005,ACAP1-006,ACAP1-007,ACAP1-008,ACAP1-009,ACAP1-010,ACAP1-011,ACAP1-012,ACAP1_HUMAN,Ankyrin repeat domain containing,ArfGAPs,BAA06418.2,BAR-PH domain containing,BC018543,BT009788,CCDS11101,CCDS11101.1,CENTB1,Centaurin-beta-1,D30758,ENSG00000072818,ENSP00000158762,ENSP00000328352,ENSP0000…
AIMP1	9606.ENSP00000378191	https://smart.embl.de/smart/DDvec.cgi?smart=336:COIL(32|102)+Pfam_tRNA_bind(181|274)+	Aminoacyl tRNA synthase complex-interacting multifunctional protein 1; Non-catalytic component of the multisynthase complex. Stimulates the catalytic activity of cytoplasmic arginyl-tRNA synthase. Binds tRNA. Possesses inflammatory cytokine activity. Negatively regulates TGF-beta signaling through stabilization of SMURF2 by binding to SMURF2 and inhibiting its SMAD7-mediated degradation. Involved…	1E7Z,1EUJ,1FL0,4R3Z,9255,AAA62202.1,AAH14051.1,AIMP1,AIMP1-001,AIMP1-002,AIMP1-004,AIMP1-201,AIMP1_HUMAN,AK095951,AK303965,ARS-interacting multifunctional protein 1,B3KTR2,B4E1S7,BAG53174.1,BAG64889.1,BC014051,CAB017618,CAG47076.1,CCDS3674,CCDS3674.1,CCDS47121,CCDS47121.1,CR542281,D6R937,EMAP II,EMAP-2,EMAP2,EMAPII,ENSG00000164022,ENSP00000296407,ENSP00000321103,ENSP00000337802,ENSP00000350699,EN…
ANAPC10	9606.ENSP00000478501	https://smart.embl.de/smart/DDvec.cgi?smart=185:APC10(22|184)+	Anaphase-promoting complex subunit 10; Component of the anaphase promoting complex/cyclosome (APC/C), a cell cycle-regulated E3 ubiquitin ligase that controls progression through mitosis and the G1 phase of the cell cycle. The APC/C complex acts by mediating ubiquitination and subsequent degradation of target proteins: it mainly mediates the formation of 'Lys-11'-linked polyubiquitin chains and, …	10393,1JHJ,4UI9,5A31,5G04,5G05,5KHR,5KHU,5L9T,5L9U,5LCW,AAD30527.1,AAH05217.1,AAY40941.1,AB012109,ABB96248.1,AC097649,AF132794,AL080090,ANAPC10,ANAPC10-001,ANAPC10-002,ANAPC10-003,ANAPC10-004,ANAPC10-005,ANAPC10-006,ANAPC10-007,ANAPC10-008,ANAPC10-009,ANAPC10-010,ANAPC10-011,ANAPC10-012,ANAPC10-013,ANAPC10-014,ANAPC10-015,ANAPC10-016,ANAPC10-201,APC10,APC10_HUMAN,Anaphase promoting complex,Anapha…
ARHGEF6	9606.ENSP00000250617	https://smart.embl.de/smart/DDvec.cgi?smart=776:CH(3|106)+Pfam_RhoGEF67_u1(114|160)+SH3(163|218)+RhoGEF(245|420)+PH(450|550)+Pfam_RhoGEF67_u2(570|678)+Pfam_betaPIX_CC(681|769)+	Rho guanine nucleotide exchange factor 6; Acts as a RAC1 guanine nucleotide exchange factor (GEF); Pleckstrin homology domain containing	1UJY,1WYR,9459,A6NMW9,A8K6S7,AAG27169.1,AAH39856.1,AAH43505.1,AF207831,AK291742,AK294929,AL135783,AL683813,ARHG6_HUMAN,ARHGEF6,ARHGEF6-001,ARHGEF6-002,ARHGEF6-003,Alpha-Pix,B1AL37,BAA02796.1,BAA04985.1,BAF84431.1,BAH11929.1,BC039856,BC043505,BX537390,CAD97632.1,CAI39443.1,CAI42899.1,CAI42903.1,CCDS14660,CCDS14660.1,CCDS78509,COOL-2,COOL2,Cool-2,Cool2,D13631,D25304,EAW88460.1,EAW88461.1,ENSG000001…
C10orf32	9606.ENSP00000342331	https://smart.embl.de/smart/DDvec.cgi?smart=106:Pfam_BORCS7(1|104)+	BLOC-1-related complex subunit 7; As part of the BORC complex may play a role in lysosomes movement and localization at the cell periphery. Associated with the cytosolic face of lysosomes, the BORC complex may recruit ARL8B and couple lysosomes to microtubule plus-end-directed kinesin motor; Belongs to the BORCS7 family	119032,B2R488,B3KUW4,BLOC-1 related complex subunit 7,BLOC-1-related complex subunit 7,BORC7_HUMAN,BORCS7,C10orf32,C10orf32-001,C10orf32-002,C10orf32-003,C9K0X3,CCDS7542.2,Chromosome 10 open reading frame 32,Diaskedin,ENSG00000166275,ENSP00000299353,ENSP00000325971,ENSP00000342331,ENSP00000347370,ENSP00000352494,ENSP00000358895,ENSP00000358896,ENSP00000358899,ENST00000299353,ENST00000326583,ENST0…
C17orf85	9606.ENSP00000373657	https://smart.embl.de/smart/DDvec.cgi?smart=620:Pfam_NCBP3(123|177)+COIL(344|369)+	Nuclear cap-binding protein subunit 3; Associates with NCBP1/CBP80 to form an alternative cap- binding complex (CBC) which plays a key role in mRNA export. NCBP3 serves as adapter protein linking the capped RNAs (m7GpppG-capped RNA) to NCBP1/CBP80. Unlike the conventional CBC with NCBP2 which binds both small nuclear RNA (snRNA) and messenger (mRNA) and is involved in their export from the nucleu…	55421,AAH10707.1,AJ277841,AK125048,AK223470,B3KWG7,BAD97190.1,BAG54129.1,BC010707,C17ORF85,C17ORF85-001,C17ORF85-002,C17ORF85-003,C17ORF85-004,C17ORF85-005,C17ORF85-006,C17orf85,C17orf85-001,C17orf85-002,C17orf85-003,C17orf85-004,C17orf85-005,C17orf85-006,CAB91001.1,CCDS45578.1,Chromosome 17 open reading frame 85,EAW90479.1,ELG,ENSG00000074356,ENSP00000158149,ENSP00000301385,ENSP00000330474,ENSP0…
CCDC93	9606.ENSP00000365477	https://smart.embl.de/smart/DDvec.cgi?smart=631:Pfam_KOG2701(27|206)+COIL(316|426)+COIL(560|601)+	Coiled-coil domain-containing protein 93; Involved in copper-dependent ATP7A trafficking between the trans-Golgi network and vesicles in the cell periphery; the function is proposed to depend on its association within the CCC complex and cooperation with the WASH complex on early endosomes and is dependent on its interaction with WASHC2C	54520,A8K3V7,AAH28609.2,AAH93018.1,AAX93279.1,AB209993,AC009303,AC009404,AK001858,AK025611,AK290722,BAA91945.1,BAB15188.1,BAE06075.1,BAF83411.1,BC028609,BC093018,CCC complex,CCD93_HUMAN,CCDC93,CCDC93-001,CCDC93-002,CCDC93-003,CCDC93-004,CCDC93-005,CCDC93-006,CCDC93-007,CCDC93-008,CCDC93-010,CCDS2121,CCDS2121.2,Coiled-coil domain containing 93,Coiled-coil domain-containing protein 93,EAW95197.1,EN…
CENPC	9606.ENSP00000273853	https://smart.embl.de/smart/DDvec.cgi?smart=943:Pfam_CENP_C_N(7|292)+Pfam_CENP-C_mid(296|552)+Pfam_CENP-C_C(856|940)+	Centromere protein C; Component of the CENPA-NAC (nucleosome-associated) complex, a complex that plays a central role in assembly of kinetochore proteins, mitotic progression and chromosome segregation. The CENPA-NAC complex recruits the CENPA-CAD (nucleosome distal) complex and may be involved in incorporation of newly synthesized CENPA into centromeres. CENPC recruits DNA methylation and DNMT3B…	1060,5LSJ,5LSK,AAA51974.1,AAF73191.1,AAH30695.1,AAH41117.1,AC104806,AC109356,AF151723,BC030695,BC041117,CCDS47063,CCDS47063.1,CENP-C,CENPC,CENPC-001,CENPC-003,CENPC-004,CENPC-005,CENPC-006,CENPC-007,CENPC-008,CENPC1,CENPC_HUMAN,Centromere autoantigen C,Centromere protein C,Centromere protein C 1,Constitutive centromere associated network,EAX05545.1,ENSG00000145241,ENSP00000273853,ENSP00000421234,…
CEPT1	9606.ENSP00000441980	https://smart.embl.de/smart/DDvec.cgi?smart=416:Pfam_CDP-OH_P_transf(83|158)+TRANS(181|203)+TRANS(213|235)+TRANS(248|270)+TRANS(285|304)+TRANS(317|339)+TRANS(370|389)+	Choline/ethanolaminephosphotransferase 1; Catalyzes both phosphatidylcholine and phosphatidylethanolamine biosynthesis from CDP-choline and CDP- ethanolamine, respectively. Involved in protein-dependent process of phospholipid transport to distribute phosphatidyl choline to the lumenal surface. Has a higher cholinephosphotransferase activity than ethanolaminephosphotransferase activity; Belongs t…	10390,2.7.8.1,2.7.8.2,A0A024R0C0,AAD25170.1,AAF61194.1,AAH32610.1,AAH49196.1,AF068302,AF138862,AL355816,AL833102,BC032610,BC049196,CAH10403.1,CAI19367.1,CCDS830,CCDS830.1,CEPT1,CEPT1-001,CEPT1-002,CEPT1-003,CEPT1-004,CEPT1-005,CEPT1-006,CEPT1-007,CEPT1-008,CEPT1-009,CEPT1-201,CEPT1-202,CEPT1_HUMAN,Choline/ethanolamine phosphotransferase 1,Choline/ethanolaminephosphotransferase 1,EAW56470.1,EAW564…
CLEC16A	9606.ENSP00000387122	https://smart.embl.de/smart/DDvec.cgi?smart=1053:Pfam_FPL(51|198)+	Protein CLEC16A; Regulator of mitophagy through the upstream regulation of the RNF41/NRDP1-PRKN pathway. Mitophagy is a selective form of autophagy necessary for mitochondrial quality control. The RNF41/NRDP1-PRKN pathway regulates autophagosome-lysosome fusion during late mitophagy. May protect RNF41/NRDP1 from proteosomal degradation, RNF41/NRDP1 which regulates proteosomal degradation of PRKN.…	23274,AAI12898.1,AB002348,AC007014,AC007220,AC133065,AK126771,BAA20807.3,BC112897,C-type lectin domain containing,C-type lectin domain containing 16A,C-type lectin domain family 16 member A,C-type lectin domain family 16, member A,CCDS45409,CCDS45409.1,CCDS58423,CCDS58423.1,CL16A_HUMAN,CLEC16A,CLEC16A-001,CLEC16A-002,CLEC16A-003,CLEC16A-004,CLEC16A-005,CLEC16A-006,CLEC16A-007,CLEC16A-008,CLEC16A-…
CNOT11	9606.ENSP00000289382	https://smart.embl.de/smart/DDvec.cgi?smart=510:Pfam_DUF2363(371|495)+	CCR4-NOT transcription complex subunit 11; Component of the CCR4-NOT complex which is one of the major cellular mRNA deadenylases and is linked to various cellular processes including bulk mRNA degradation, miRNA-mediated repression, translational repression during translational initiation and general transcription regulation. Additional complex functions may be a consequence of its influence on …	55571,AAF02418.1,AAH18664.2,AAH64421.1,AAY15088.1,AF103798,AK024221,B3KNB0,BAG51272.1,BC018664,BC064421,C2orf29,C40,CCDS2050,CCDS2050.1,CCR4-NOT transcription complex,CCR4-NOT transcription complex subunit 11,CCR4-NOT transcription complex, subunit 11,CNO11_HUMAN,CNOT11,CNOT11-001,CNOT11-002,CNOT11-003,ENSG00000158435,ENSP00000289382,ENSP00000394203,ENST00000289382,ENST00000420107,ENST00000462489…
COMMD1	9606.ENSP00000308236	https://smart.embl.de/smart/DDvec.cgi?smart=190:Pfam_COMMD1_N(6|107)+Pfam_COMM_domain(117|187)+	COMM domain-containing protein 1; Proposed scaffold protein that is implicated in diverse physiological processes and whose function may be in part linked to its ability to regulate ubiquitination of specific cellular proteins. Can modulate activity of cullin-RING E3 ubiquitin ligase (CRL) complexes by displacing CAND1; in vitro promotes CRL E3 activity and dissociates CAND1 from CUL1 and CUL2. P…	150684,2H2M,AAH09266.2,AAH22046.1,AAX93080.1,AAY24054.1,AAY24141.1,AB178811,AC018462,AC116652,B4DFQ4,BAD18972.1,BC009266,BC022046,C2ORF5,C2orf5,CCC complex,CCDS1869,CCDS1869.1,COMD1_HUMAN,COMM domain containing,COMM domain containing 1,COMM domain-containing protein 1,COMMD1,COMMD1-001,COMMD1-002,COMMD1-003,COMMD1-004,COMMD1-005,COMMD1-006,COMMD1-007,COMMD1-008,Copper metabolism (Murr1) domain co…
COMMD10	9606.ENSP00000274458	https://smart.embl.de/smart/DDvec.cgi?smart=202:Pfam_COMM_domain(131|202)+	COMM domain-containing protein 10; May modulate activity of cullin-RING E3 ubiquitin ligase (CRL) complexes. May down-regulate activation of NF-kappa-B	51397,AAD44489.1,AAF28983.1,AAH05179.1,AAS22247.1,AC018752,AC109456,AF078857,AF161423,AK002147,AY542165,BAA92108.1,BC005179,CCC complex,CCDS34215,CCDS34215.1,CCDS78049,COMDA_HUMAN,COMM domain containing,COMM domain containing 10,COMM domain-containing protein 10,COMMD10,COMMD10-001,COMMD10-002,COMMD10-003,COMMD10-004,COMMD10-005,COMMD10-006,D3DT07,D6RC04,D6RJ90,EAW48941.1,EAW48942.1,EAW48943.1,EN…
COMMD5	9606.ENSP00000394331	https://smart.embl.de/smart/DDvec.cgi?smart=224:Pfam_COMM_domain(149|216)+	COMM domain-containing protein 5; May modulate activity of cullin-RING E3 ubiquitin ligase (CRL) complexes. Negatively regulates cell proliferation. Negatively regulates cell cycle G2/M phase transition probably by transactivating p21/CDKN1A through the p53/TP53-independent signaling pathway. Involved in kidney proximal tubule morphogenesis (By similarity). Down-regulates activation of NF-kappa-B…	28991,AAF14877.1,AAG09915.1,AAH02672.1,AAH03055.1,AAH65729.1,AF113540,AF235103,AF290195,AK001477,AK023070,BAA91714.1,BAB14389.1,BC002672,BC003055,BC065729,CCDS6436,CCDS6436.1,COMD5_HUMAN,COMM domain containing,COMM domain containing 5,COMM domain-containing protein 5,COMMD5,COMMD5-002,COMMD5-003,COMMD5-004,COMMD5-005,COMMD5-006,COMMD5-007,COMMD5-201,D3DWN7,E9PJE4,EAW82033.1,EAW82034.1,EAW82035.1,…
COMMD7	9606.ENSP00000278980	https://smart.embl.de/smart/DDvec.cgi?smart=200:Pfam_COMM_domain(131|200)+	COMM domain-containing protein 7; May modulate activity of cullin-RING E3 ubiquitin ligase (CRL) complexes. Associates with the NF-kappa-B complex and suppresses its transcriptional activity	149951,A2BHJ2,AAH00628.3,AAH47440.1,AAS22244.1,AK027893,AK096307,AL035071,AY542162,B3KTZ2,BAB55436.1,BAG53254.1,BC000628,BC047440,BI821799,BX640505,C20orf92,CCC complex,CCDS42864,CCDS42864.1,CCDS46587,CCDS46587.1,COMD7_HUMAN,COMM domain containing,COMM domain containing 7,COMM domain-containing protein 7,COMMD7,COMMD7-001,COMMD7-003,COMMD7-004,COMMD7-005,CR383702,EAW76360.1,ENSG00000149600,ENSP00…
COPS6	9606.ENSP00000304102	https://smart.embl.de/smart/DDvec.cgi?smart=327:JAB_MPN(40|173)+Pfam_MitMem_reg(194|307)+	COP9 signalosome complex subunit 6; Component of the COP9 signalosome complex (CSN), a complex involved in various cellular and developmental processes. The CSN complex is an essential regulator of the ubiquitin (Ubl) conjugation pathway by mediating the deneddylation of the cullin subunits of SCF-type E3 ligase complexes, leading to decrease the Ubl ligase activity of SCF-type complexes such as …	10980,4D10,4D18,4QFT,4R14,4WSN,A4D2A3,AAD03469.1,AAH02520.2,AK312024,B2R514,BAG34961.1,BC002520,C9JQK5,CCDS5682,CCDS5682.1,COP9 signalosome,COP9 signalosome complex subunit 6,COP9 signalosome subunit 6,COP9 subunit 6,COPS6,COPS6-001,COPS6-002,COPS6-003,COPS6-004,COPS6-005,COPS6-006,COPS6-007,COPS6-008,COPS6-009,COPS6-010,CSN6,CSN6_HUMAN,E7EM64,EAL23857.1,EAW76601.1,ENSG00000168090,ENSP00000304102…
EIF3G	9606.ENSP00000253108	https://smart.embl.de/smart/DDvec.cgi?smart=320:Pfam_eIF3g(56|175)+RRM(240|313)+	Eukaryotic translation initiation factor 3 subunit G; RNA-binding component of the eukaryotic translation initiation factor 3 (eIF-3) complex, which is required for several steps in the initiation of protein synthesis. The eIF-3 complex associates with the 40S ribosome and facilitates the recruitment of eIF-1, eIF-1A, eIF-2:GTP:methionyl-tRNAi and eIF-5 to form the 43S pre- initiation complex (43…	2CQ0,2MJC,5K0Y,8666,AAB71866.1,AAC78728.1,AAG15396.1,AAG15419.1,AAH00733.1,AAH08469.1,AAP35535.1,AF020833,AF092453,AF094850,BC000733,BC008469,BT006889,CCDS12227,CCDS12227.1,EIF3-P42,EIF3G,EIF3G-001,EIF3G-002,EIF3G-003,EIF3G-004,EIF3G-005,EIF3G-006,EIF3G-007,EIF3G-008,EIF3G-009,EIF3G-010,EIF3G-011,EIF3G-012,EIF3G-013,EIF3G-014,EIF3G-015,EIF3G-016,EIF3G-017,EIF3G-018,EIF3G-019,EIF3G_HUMAN,EIF3S4,EN…
ELP6	9606.ENSP00000296149	https://smart.embl.de/smart/DDvec.cgi?smart=266:Pfam_ELP6(2|251)+	Elongator complex protein 6; Acts as subunit of the RNA polymerase II elongator complex, which is a histone acetyltransferase component of the RNA polymerase II (Pol II) holoenzyme and is involved in transcriptional elongation. Elongator may play a role in chromatin remodeling and is involved in acetylation of histones H3 and probably H4. Involved in cell migration	54859,AAH00623.1,AAH14204.1,ABG79574.1,AK000218,ATP1,Angiotonin-transactivated protein 1,BAA91017.1,BC000623,BC014204,C3orf75,C9IYN7,C9J2D6,C9J9N8,C9JA82,C9JEX8,C9JLH5,CCDS43082,CCDS43082.1,DQ787088,ELP6,ELP6-001,ELP6-003,ELP6-004,ELP6-005,ELP6-006,ELP6-007,ELP6-008,ELP6-009,ELP6-010,ELP6-011,ELP6-012,ELP6-013,ELP6-014,ELP6-015,ELP6-016,ELP6_HUMAN,ENSG00000163832,ENSP00000296149,ENSP00000330770,E…
EMC7	9606.ENSP00000256545	https://smart.embl.de/smart/DDvec.cgi?smart=242:SIGNAL(1|23)+Pfam_DUF2012(56|168)+	ER membrane protein complex subunit 7	1B0G,1LP9,2J8U,2JCC,2UWE,56851,A0A024R9K7,AAG44477.1,AAH12456.1,AAI04935.1,AAI04937.1,AAQ88810.1,AC069045,AC079203,AF242729,AJ245874,AJ250344,AK314883,AY358445,B2RC00,BAG37397.1,BC012456,BC104934,BC104936,C11orf3,C15ORF24,C15orf24,CAB96539.1,CAC01611.1,CCDS10032,CCDS10032.1,EAW92285.1,EAW92286.1,EMC7,EMC7-001,EMC7-002,EMC7-003,EMC7-004,EMC7_HUMAN,ENSG00000134153,ENSP00000256545,ENSP00000434292,EN…
FUBP3	9606.ENSP00000318177	https://smart.embl.de/smart/DDvec.cgi?smart=572:KH(76|146)+KH(161|233)+KH(252|322)+KH(353|426)+	Far upstream element-binding protein 3; May interact with single-stranded DNA from the far- upstream element (FUSE). May activate gene expression	8939,A0A024R8A7,A3KFK8,A3KFL0,AAC50893.1,AAH01325.1,AAH07874.1,AAI37339.1,AAI37341.1,AK295155,AL353695,BAG58170.1,BC001325,BC007874,BC137338,BC137340,CAH70960.1,CAH70961.1,CAM45743.1,CAM45745.1,CCDS43893,CCDS43893.1,EAW87937.1,EAW87938.1,ENSG00000107164,ENSP00000277477,ENSP00000302228,ENSP00000318177,ENSP00000351562,ENSP00000361451,ENSP00000361453,ENSP00000405459,ENST00000277477,ENST00000302073,E…
GOSR2	9606.ENSP00000225567	https://smart.embl.de/smart/DDvec.cgi?smart=213:COIL(61|90)+Pfam_V-SNARE_C(121|186)+	Golgi SNAP receptor complex member 2; Involved in transport of proteins from the cis/medial- Golgi to the trans-Golgi network; Belongs to the GOSR2 family	27 kDa Golgi SNARE protein,3EG9,9570,AAB82651.1,AAH09710.1,AAH34762.1,AAK01855.1,AC005670,AF007548,AF229796,AK290890,BAF83579.1,BC009710,BC034762,Bos1,CAB017456,CCDS11507,CCDS11507.1,CCDS42355,CCDS42355.1,CCDS45719,CCDS45719.1,CCDS82148,D3DXJ5,D3DXJ6,EAW57694.1,EAW57695.1,EAW57696.1,EAW57699.1,EAW57700.1,ENSG00000108433,ENSP00000225567,ENSP00000318814,ENSP00000350196,ENSP00000377101,ENSP000003905…
GTF2A1	9606.ENSP00000452454	https://smart.embl.de/smart/DDvec.cgi?smart=376:TFIIA(12|376)+	Transcription initiation factor IIA subunit 1; TFIIA is a component of the transcription machinery of RNA polymerase II and plays an important role in transcriptional activation. TFIIA in a complex with TBP mediates transcriptional activity; Belongs to the TFIIA subunit 1 family	1NVP,2957,5FUR,5IY6,5IY7,5IY8,5IY9,5IYA,5IYB,5IYC,5IYD,AAF26776.1,AAI07156.1,AAI07157.1,BAA03603.1,BAA03604.1,BC107155,BC107156,CAA53151.1,CAA53152.1,CAA54442.1,CCDS9873,CCDS9873.1,CCDS9874,CCDS9874.1,D14886,D14887,ENSG00000165417,ENSP00000298173,ENSP00000341827,ENSP00000377229,ENSP00000409492,ENSP00000452454,ENST00000298173,ENST00000344860,ENST00000393604,ENST00000434192,ENST00000553612,ENST0000…
GUK1	9606.ENSP00000355689	https://smart.embl.de/smart/DDvec.cgi?smart=241:GuKc(24|198)+	Guanylate kinase; Essential for recycling GMP and indirectly, cGMP	2.7.4.8,2987,A0A024R3U5,AAC37598.1,AAC50659.1,AAH06249.1,AAH07369.2,AAH09914.1,AAH91480.1,AK303845,B1ANH0,B1ANH1,B1ANH2,B1ANH3,B1ANH5,B1ANH6,BAG64788.1,BC006249,BC007369,BC009914,BC091480,CAG33117.1,CAG46803.1,CCDS1568,CCDS1568.1,CCDS53481,CCDS53481.1,CCDS55689,CCDS55689.1,CHEMBL4989,CR456836,CR542006,EAW69851.1,EAW69852.1,EAW69854.1,EAW69856.1,EAW69858.1,EC 2.7.4.8,ENSG00000143774,ENSP0000027212…
HNRNPK	9606.ENSP00000365439	https://smart.embl.de/smart/DDvec.cgi?smart=464:KH(41|109)+KH(143|214)+KH(386|456)+	Heterogeneous nuclear ribonucleoprotein K; One of the major pre-mRNA-binding proteins. Binds tenaciously to poly(C) sequences. Likely to play a role in the nuclear metabolism of hnRNAs, particularly for pre-mRNAs that contain cytidine-rich sequences. Can also bind poly(C) single- stranded DNA. Plays an important role in p53/TP53 response to DNA damage, acting at the level of both transcription ac…	1J5K,1KHM,1ZZI,1ZZJ,1ZZK,3190,AAB20770.1,AAH00355.1,AAH14980.1,AB209562,AB451263,AB451390,AK096385,AK123117,AK291336,AK300744,AUKS,B3KU16,B4DUQ1,BAD92799.1,BAF84025.1,BAG53278.1,BAG53872.1,BAG62413.1,BAG70077.1,BAG70204.1,BC000355,BC014980,CAA51267.1,CAB004435,CAB016225,CAG33052.1,CAI16020.1,CCDS6667,CCDS6667.1,CCDS6668,CCDS6668.1,CR456771,CSBP,EAW62675.1,EAW62677.1,ENSG00000165119,ENSP0000029781…
HPS3	9606.ENSP00000296051	https://smart.embl.de/smart/DDvec.cgi?smart=1004:Pfam_HPS3_N(3|212)+Pfam_HPS3_Mid(256|642)+Pfam_HPS3_C(651|1002)+	Hermansky-Pudlak syndrome 3 protein; Involved in early stages of melanosome biogenesis and maturation; Biogenesis of lysosomal organelles complex 2	84343,A8K6G6,AAH16901.1,AAH22062.2,AAH40359.1,AAK53457.1,AAK84131.1,AC131209,AF375663,AK026357,AK056575,AK291631,AL833878,AY033141,BAB15459.1,BAB71221.1,BAF84320.1,BC016901,BC022062,BC040359,BLOC2S1,Biogenesis of lysosomal organelles complex 2,CAD38735.1,CCDS3140,CCDS3140.1,CCDS77836,DKFZP762O156,EAW78886.1,EAW78887.1,ENSG00000163755,ENSP00000296051,ENSP00000322873,ENSP00000418230,ENSP00000419824…
HSPA6	9606.ENSP00000310219	https://smart.embl.de/smart/DDvec.cgi?smart=643:Pfam_MreB_Mbl(118|385)+	Heat shock 70 kDa protein 6; Molecular chaperone implicated in a wide variety of cellular processes, including protection of the proteome from stress, folding and transport of newly synthesized polypeptides, activation of proteolysis of misfolded proteins and the formation and dissociation of protein complexes. Plays a pivotal role in the protein quality control system, ensuring the correct foldi…	3310,3FE1,AAH04279.1,AAH35665.1,ABF47108.1,BC004279,BC035665,CAA36061.1,CAA36062.1,CAB017452,CAI16120.1,CCDS1231,CCDS1231.1,DQ521571,ENSG00000173110,ENSP00000310219,ENSP00000356947,ENSP00000445864,ENST00000309758,ENST00000367970,ENST00000545155,HGNC:5239,HPA028549,HSP70B,HSP76_HUMAN,HSPA6,HSPA6-001,Heat shock 70 kDa protein 6,Heat shock 70 kDa protein B,Heat shock 70kDa protein 6 (HSP70B'),Heat s…
INTS12	9606.ENSP00000415433	https://smart.embl.de/smart/DDvec.cgi?smart=462:PHD(161|213)+	Integrator complex subunit 12; Component of the Integrator complex, a complex involved in the small nuclear RNAs (snRNA) U1 and U2 transcription and in their 3'-box-dependent processing. The Integrator complex is associated with the C-terminal domain (CTD) of RNA polymerase II largest subunit (POLR2A) and is recruited to the U1 and U2 snRNAs genes. Mediates recruitment of cytoplasmic dynein to th…	57117,A0A024RDK4,AAF99604.1,AAH14442.1,AC093782,AF242524,AK314939,B2RC48,BAG37445.1,BC014442,BK005729,C9J0M6,C9JDP3,C9JJW5,CCDS3671,CCDS3671.1,D6R9W3,DAA05729.1,E9PGI3,EAX06189.1,EAX06190.1,ENSG00000138785,ENSP00000265150,ENSP00000265155,ENSP00000340737,ENSP00000378221,ENSP00000396309,ENSP00000396729,ENSP00000412317,ENSP00000415433,ENSP00000421835,ENSP00000422048,ENSP00000422856,ENSP00000423618,E…
IRF3	9606.ENSP00000471896	https://smart.embl.de/smart/DDvec.cgi?smart=452:IRF(1|112)+IRF-3(201|357)+	Interferon regulatory factor 3; Key transcriptional regulator of type I interferon (IFN)-dependent immune responses which plays a critical role in the innate immune response against DNA and RNA viruses. Regulates the transcription of type I IFN genes (IFN-alpha and IFN-beta) and IFN-stimulated genes (ISG) by binding to an interferon-stimulated response element (ISRE) in their promoters. Acts as a…	1J2F,1QWT,1T2K,1ZOQ,2O61,2O6G,2PI0,3661,3A77,3QU6,5JEJ,5JEK,5JEL,5JEM,5JEO,5JER,A8K7L2,AAC68818.1,AAD05262.1,AAH00660.1,AAH71721.1,AB102884,AB102886,AB102887,AF112181,AK292027,AK314421,B2RAZ3,BAD89413.1,BAD89415.1,BAD89416.1,BAF84716.1,BAG37040.1,BC000660,BC071721,CAA91227.1,CAB013018,CCDS12775,CCDS12775.1,CCDS56099,CCDS56099.1,CCDS59407,CCDS59407.1,CCDS59408,CCDS59408.1,CCDS59409,CCDS59409.1,EAW…
ITSN2	9606.ENSP00000347244	https://smart.embl.de/smart/DDvec.cgi?smart=1697:EH(15|109)+EFh(281|309)+COIL(364|555)+COIL(580|622)+COIL(647|756)+SH3(760|817)+SH3(901|955)+SH3(984|1038)+SH3(1056|1116)+SH3(1130|1185)+RhoGEF(1213|1394)+PH(1435|1546)+C2(1570|1667)+	Intersectin-2; Adapter protein that may provide indirect link between the endocytic membrane traffic and the actin assembly machinery. May regulate the formation of clathrin-coated vesicles (CCPs). Seems to be involved in CCPs maturation including invagination or budding. Involved in endocytosis of integrin beta-1 (ITGB1) and transferrin receptor (TFR). Plays a role in dendrite formation by melan…	1J3T,1UDL,1UE9,1UFF,1UHF,3GF9,3JZY,4IIO,50618,AAC50593.1,AAD00899.1,AAF59903.1,AAF59904.1,AAF63600.1,AAX93122.1,AAY14668.1,AB033082,AC009228,AF001630,AF182198,AF182199,AF248540,AK000302,AK021545,BAA86570.1,BAA91068.1,BAB13841.1,C2 domain containing,CCDS1710,CCDS1710.2,CCDS1711,CCDS1711.2,CCDS46230,CCDS46230.1,E7EPJ2,EF-hand domain containing,ENSG00000198399,ENSP00000347244,ENSP00000353923,ENSP000…
KCMF1	9606.ENSP00000386738	https://smart.embl.de/smart/DDvec.cgi?smart=381:ZnF_ZZ(3|48)+ZnF_C2H2(78|101)+COIL(224|259)+	E3 ubiquitin-protein ligase KCMF1; Has intrinsic E3 ubiquitin ligase activity and promotes ubiquitination; Belongs to the KCMF1 family	2.3.2.27,56888,AAF67009.1,AAH00178.1,AAX88897.1,AAY24192.1,AB083199,AC078974,AF155652,AK023403,AK314761,AL122115,BAB14563.1,BAC43745.1,BAG37299.1,BC000178,C9J3I2,C9JSW5,CAB59274.1,CCDS46350,CCDS46350.1,DEBT91,DKFZP434L1021,E3 ubiquitin-protein ligase KCMF1,EC 2.3.2.27,ENSG00000176407,ENSP00000319986,ENSP00000386738,ENSP00000389282,ENSP00000391340,ENSP00000409499,ENSP00000414214,ENST00000319855,EN…
KIAA1033	9606.ENSP00000484713	https://smart.embl.de/smart/DDvec.cgi?smart=1174:Pfam_WASH-7_N(32|605)+Pfam_WASH-7_mid(606|950)+Pfam_WASH-7_C(967|1136)+	WASH complex subunit 4; Acts at least in part as component of the WASH core complex whose assembly at the surface of endosomes seems to inhibit WASH nucleation-promoting factor (NPF) activity in recruiting and activating the Arp2/3 complex to induce actin polymerization, and which is involved in the regulation of the fission of tubules that serve as transport intermediates during endosome sorting	23325,AAH31358.1,AAH40936.1,AAI04993.1,AAI04995.1,AAI10851.1,AB028956,AC016257,AK001657,BAA82985.1,BAA91816.1,BC031358,BC040936,BC104992,BC104994,BC110850,CCDS41826.1,CCDS73514.1,ENSG00000136051,ENSP00000258537,ENSP00000311757,ENSP00000328062,ENSP00000347544,ENSP00000447015,ENSP00000448966,ENSP00000450166,ENSP00000450243,ENSP00000473263,ENSP00000484713,ENST00000258537,ENST00000311317,ENST00000332…
KIAA2013	9606.ENSP00000365756	https://smart.embl.de/smart/DDvec.cgi?smart=634:Pfam_DUF2152(6|629)+	Uncharacterized protein KIAA2013; KIAA2013	90231,A0A024R4J3,AAH04501.2,AAH35033.1,AB095933,AL833891,BAC23109.1,BC004501,BC035033,CAD38747.1,CAI19081.1,CAI19082.1,CAI23397.1,CCDS141,CCDS141.1,EAW71721.1,EAW71723.1,ENSG00000116685,ENSP00000235326,ENSP00000329841,ENSP00000332453,ENSP00000337708,ENSP00000351580,ENSP00000365756,ENSP00000365760,ENSP00000480577,ENST00000235326,ENST00000329923,ENST00000333738,ENST00000336256,ENST00000358733,ENST0…
KRTCAP2	9606.ENSP00000295682	https://smart.embl.de/smart/DDvec.cgi?smart=162:Pfam_Keratin_assoc(29|159)+	Keratinocyte-associated protein 2; Acts as accessory component of the N-oligosaccharyl transferase (OST) complex which catalyzes the transfer of a high mannose oligosaccharide from a lipid-linked oligosaccharide donor to an asparagine residue within an Asn-X-Ser/Thr consensus motif in nascent polypeptide chains. Required for efficient substrate- specific N-glycosylation probably involving the STT…	200185,AAH29806.1,AAH48205.1,AAH57233.1,AAO13161.2,AK311907,AL607067,AY157577,B2R4Q1,BAG34848.1,BC029806,BC048205,BC057233,CCDS1096,CCDS1096.1,ENSG00000163463,ENSP00000295682,ENSP00000326601,ENSP00000357370,ENST00000295682,ENST00000314638,ENST00000343287,ENST00000461136,ENST00000463527,ENST00000471891,ENST00000482246,ENST00000487350,ENST00000490672,ENST00000491084,ENST00000492892,ENST00000497317,…
LSM12	9606.ENSP00000466718	https://smart.embl.de/smart/DDvec.cgi?smart=195:AD(78|165)+	LSM12 homolog	124801,AAH44587.1,AAI05289.1,AK055218,BAB70877.1,BC044587,BC105288,CCDS11475,CCDS11475.1,ENSG00000161654,ENSP00000293406,ENSP00000392030,ENSP00000466074,ENSP00000466718,ENST00000293406,ENST00000411445,ENST00000585388,ENST00000590563,ENST00000591247,FLJ30656,HGNC:26407,HPA051934,Hs.355570,Hs.573448,K7ELG9,LSM12,LSM12 homolog,LSM12 homolog (S. cerevisiae),LSM12-001,LSM12-002,LSM12-003,LSM12-201,LSM…
LSM5	9606.ENSP00000410758	https://smart.embl.de/smart/DDvec.cgi?smart=91:Sm(16|84)+	U6 snRNA-associated Sm-like protein LSm5; Plays a role in U6 snRNP assembly and function. Binds to the 3' end of U6 snRNA, thereby facilitating formation of the spliceosomal U4/U6 duplex formation in vitro; LSm proteins	23658,3JCR,5O9Z,AAD56229.1,AAH05938.1,AC018641,AF182291,AJ238097,B8ZZF8,BC005938,BF701546,CAB45868.1,CCDS47571,CCDS47571.1,CCDS5438,CCDS5438.1,ENSG00000106355,ENSP00000223084,ENSP00000386275,ENSP00000386363,ENSP00000386707,ENSP00000386814,ENSP00000387109,ENSP00000387126,ENSP00000410758,ENST00000223084,ENST00000409292,ENST00000409782,ENST00000409909,ENST00000409952,ENST00000409987,ENST00000410044,…
LSM6	9606.ENSP00000422392	https://smart.embl.de/smart/DDvec.cgi?smart=80:Sm(10|75)+	U6 snRNA-associated Sm-like protein LSm6; Component of LSm protein complexes, which are involved in RNA processing and may function in a chaperone-like manner, facilitating the efficient association of RNA processing factors with their substrates. Component of the cytoplasmic LSM1-LSM7 complex, which is thought to be involved in mRNA degradation by activating the decapping step in the 5'-to-3' mR…	11157,3JCR,5O9Z,AAD56230.1,AAH16026.1,AAY41032.1,AC097372,AF182292,AJ238098,AK312126,BAG35062.1,BC016026,CAB45869.1,CCDS3767,CCDS3767.1,EAX05029.1,EAX05030.1,EAX05031.1,ENSG00000164167,ENSP00000296581,ENSP00000420929,ENSP00000422392,ENSP00000427036,ENST00000296581,ENST00000502781,ENST00000503982,ENST00000504181,ENST00000507449,ENST00000510331,ENST00000515311,HGNC:17017,HPA045079,Hs.190520,LSM6,LS…
LSM7	9606.ENSP00000252622	https://smart.embl.de/smart/DDvec.cgi?smart=103:Sm(13|86)+	U6 snRNA-associated Sm-like protein LSm7; Binds specifically to the 3'-terminal U-tract of U6 snRNA and is probably a component of the spliceosome; Belongs to the snRNP Sm proteins family	3JCR,51690,5O9Z,AAD56231.1,AAG45442.1,AAH18621.1,AF182293,BC018621,CCDS45907,CCDS45907.1,ENSG00000130332,ENSP00000252622,ENSP00000466556,ENSP00000467145,ENSP00000485007,ENST00000252622,ENST00000585395,ENST00000585409,ENST00000587502,ENST00000589532,ENST00000591515,ENST00000591745,HGNC:20470,HPA041850,Hs.683921,K7EML7,K7ENY5,LSM7,LSM7 homolog, U6 small nuclear RNA associated,LSM7-001,LSM7-002,LSM7…
MED11	9606.ENSP00000293777	https://smart.embl.de/smart/DDvec.cgi?smart=117:Pfam_Med11(8|116)+	Mediator of RNA polymerase II transcription subunit 11; Component of the Mediator complex, a coactivator involved in the regulated transcription of nearly all RNA polymerase II-dependent genes. Mediator functions as a bridge to convey information from gene-specific regulatory proteins to the basal RNA polymerase II transcription machinery. Mediator is recruited to promoters by direct interactions…	400569,AAF28974.1,AAH70377.1,AF161414,BC070377,CCDS32533,CCDS32533.1,CCDS76920,EAW90417.1,ENSG00000161920,ENSP00000293777,ENSP00000459834,ENSP00000460400,ENST00000293777,ENST00000573708,ENST00000575284,HGNC:32687,HPA056669,HSPC296,Hs.513885,I3L2Q0,I3L3E8,MED11,MED11-001,MED11-002,MED11-003,MED11_HUMAN,MGC88387,Mediator complex,Mediator complex subunit 11,NM_001001683,NM_001001683.2,NP_001001683,N…
MED30	9606.ENSP00000297347	https://smart.embl.de/smart/DDvec.cgi?smart=178:Pfam_Med30(29|176)+	Mediator of RNA polymerase II transcription subunit 30; Component of the Mediator complex, a coactivator involved in the regulated transcription of nearly all RNA polymerase II-dependent genes. Mediator functions as a bridge to convey information from gene-specific regulatory proteins to the basal RNA polymerase II transcription machinery. Mediator is recruited to promoters by direct interactions…	90390,AAH08226.1,AAL89787.1,AC024329,AC087361,AY083305,BC008226,C6GKU9,CAQ76893.1,CCDS6323,CCDS6323.1,CCDS64959,CCDS64959.1,ENSG00000164758,ENSP00000297347,ENSP00000431051,ENST00000297347,ENST00000519391,ENST00000519879,ENST00000522839,FM179284,HGNC:23032,MED30,MED30-001,MED30-002,MED30-003,MED30-004,MED30S,MED30_HUMAN,Mediator complex,Mediator complex subunit 30,NM_001282986,NM_001282986.1,NM_08…
MIEN1	9606.ENSP00000377778	https://smart.embl.de/smart/DDvec.cgi?smart=115:Pfam_Rdx(24|95)+	Migration and invasion enhancer 1; Increases cell migration by inducing filopodia formation at the leading edge of migrating cells. Plays a role in regulation of apoptosis, possibly through control of CASP3. May be involved in a redox-related process; Belongs to the SelWTH family	2LJK,84299,AAH06006.1,AAO85461.1,AAR92035.1,AF490253,AJ308025,AY508814,BC006006,C17orf37,C35,CCDS11344,CCDS11344.1,CCDS82115,ENSG00000141741,ENSP00000269578,ENSP00000377778,ENSP00000462998,ENST00000269578,ENST00000394231,ENST00000469568,ENST00000474210,ENST00000498164,ENST00000577810,ENST00000582963,HBV X-transactivated gene 4 protein,HBV XAg-transactivated protein 4,HGNC:28230,HPA056650,HPA06134…
MKRN2	9606.ENSP00000170447	https://smart.embl.de/smart/DDvec.cgi?smart=416:ZnF_C3H1(2|28)+ZnF_C3H1(32|57)+ZnF_C3H1(166|191)+RING(238|291)+ZnF_C3H1(322|349)+	Probable E3 ubiquitin-protein ligase makorin-2; E3 ubiquitin ligase catalyzing the covalent attachment of ubiquitin moieties onto substrate proteins; Ring finger proteins	2.3.2.27,23609,A6NIA2,AAF29042.2,AAG27595.1,AAG30426.1,AAH01799.2,AAH15715.1,AF161555,AF277164,AF277165,AF277166,AF277167,AF277168,AF277169,AF277170,AF302084,AK091318,AK298463,AL834512,B3KRC5,B4DPR4,BAG52337.1,BAG60676.1,BC001799,BC015715,C9J494,CAD39168.1,CCDS33702,CCDS33702.1,CCDS63545,CCDS63545.1,EAW64132.1,EAW64133.1,EC 2.3.2.27,ENSG00000075975,ENSP00000170447,ENSP00000323054,ENSP00000337622,…
MRPL34	9606.ENSP00000252602	https://smart.embl.de/smart/DDvec.cgi?smart=92:Pfam_Ribosomal_L34(49|92)+	Mitochondrial ribosomal protein L34; Belongs to the bacterial ribosomal protein bL34 family	39S ribosomal protein L34, mitochondrial,3J7Y,3J9M,5OOL,5OOM,64981,A0A024R7J4,AAH00071.1,AAH21801.1,AB049652,BAB40857.1,BC000071,BC021801,CCDS12356,CCDS12356.1,EAW84590.1,EAW84591.1,EAW84592.1,ENSG00000130312,ENSP00000252602,ENSP00000469581,ENSP00000471089,ENSP00000471820,ENSP00000472266,ENST00000252602,ENST00000594999,ENST00000595444,ENST00000597996,ENST00000600434,ENST00000602206,HGNC:14488,HPA…
MRPS10	9606.ENSP00000053468	https://smart.embl.de/smart/DDvec.cgi?smart=201:Pfam_Ribosomal_S10(77|173)+	Mitochondrial ribosomal protein S10; Belongs to the universal ribosomal protein uS10 family	28S ribosomal protein S10, mitochondrial,3J9M,55173,A0A024RD03,AAG39291.1,AAH12560.1,AF113220,AK001429,AK298219,AK316599,B2RE89,B4DP77,BAA91686.1,BAG38186.1,BAG60489.1,BC012560,CAD92529.1,CCDS4866,CCDS4866.1,EAX04086.1,EAX04087.1,ENSG00000048544,ENSP00000053468,ENSP00000362020,ENST00000053468,ENST00000372929,FLJ10567,HGNC:14502,HPA029133,HPA029134,Hs.380887,Hs.669022,MRP-S10,MRPS10,MRPS10-001,MST…
MRPS24	9606.ENSP00000318158	https://smart.embl.de/smart/DDvec.cgi?smart=167:Pfam_MRP-S24(36|167)+	Mitochondrial ribosomal protein S24; Belongs to the universal ribosomal protein uS3 family	28S ribosomal protein S24, mitochondrial,3J9M,64951,A4D1U9,AAF29013.1,AAH12167.1,AAH54865.1,AB061207,AF161453,BAB54957.1,BC012167,BC054865,CCDS5473,CCDS5473.1,EAL24009.1,EAW94173.1,ENSG00000062582,ENSP00000083014,ENSP00000318158,ENSP00000407625,ENSP00000409298,ENST00000083014,ENST00000317534,ENST00000414932,ENST00000418740,ENST00000467084,ENST00000483330,F2Z310,HGNC:14510,HPA020983,HSPC335,Hs.284…
NAA10	9606.ENSP00000417763	https://smart.embl.de/smart/DDvec.cgi?smart=235:Pfam_Acetyltransf_1(13|128)+	N-alpha-acetyltransferase 10; Catalytic subunit of the N-terminal acetyltransferase A (NatA) complex which displays alpha (N-terminal) acetyltransferase activity. Acetylates amino termini that are devoid of initiator methionine. The alpha (N-terminal) acetyltransferase activity may be important for vascular, hematopoietic and neuronal growth and development. Without NAA15, displays epsilon (inter…	2.3.1.255,600090,8260,A6NM98,A8MWP7,AAH00308.1,AAH19312.1,ARD1,ARD1 homolog A, N-acetyltransferase,ARD1 homolog, N-acetyltransferase,ARD1A,ARD1P,BC000308,BC019312,C9JN83,C9JW55,CAA54691.1,CAB006269,CCDS14737,CCDS14737.1,CCDS59179,CCDS59179.1,DXS707,EAW72774.1,EC 2.3.1.255,ENSG00000102030,ENSP00000218149,ENSP00000359026,ENSP00000359028,ENSP00000359032,ENSP00000377313,ENSP00000377315,ENSP0000039216…
NAA20	9606.ENSP00000335636	https://smart.embl.de/smart/DDvec.cgi?smart=178:Pfam_Acetyltransf_1(9|128)+	N-alpha-acetyltransferase 20; Catalytic subunit of the NatB complex which catalyzes acetylation of the N-terminal methionine residues of peptides beginning with Met-Asp, Met-Glu, Met-Asn and Met-Gln. Proteins with cell cycle functions are overrepresented in the pool of NatB substrates. Required for maintaining the structure and function of actomyosin fibers and for proper cellular migration; Belo…	2.3.1.254,51126,A6NHA3,A8MZB2,AAD40190.1,AAH05181.1,AAH08446.1,AF085355,AK311819,AL035454,AL049538,AL136641,B2R4G4,BAG34761.1,BC005181,BC008446,BG548527,CAB66576.1,CAI19341.1,CAI42118.1,CAX15127.1,CAX15212.1,CCDS13141,CCDS13141.1,CCDS13142,CCDS13142.1,CCDS42854,CCDS42854.1,EAX10213.1,EAX10214.1,EAX10215.1,EC 2.3.1.254,ENSG00000173418,ENSP00000311027,ENSP00000335636,ENSP00000344924,ENSP00000366580…
NDUFAF3	9606.ENSP00000323076	https://smart.embl.de/smart/DDvec.cgi?smart=184:Pfam_DUF498(60|168)+	NADH dehydrogenase [ubiquinone] 1 alpha subcomplex assembly factor 3; Essential factor for the assembly of mitochondrial NADH:ubiquinone oxidoreductase complex (complex I)	25915,2P1,A4FU71,AAH02873.1,AAI11005.1,BC002873,BC111004,BQ652614,C3ORF60,C3orf60,CCDS2784,CCDS2784.1,CCDS2785,CCDS2785.1,DKFZP564J0123,E3-3,EAW64944.1,EAW64945.1,ENSG00000178057,ENSP00000323003,ENSP00000323076,ENSP00000340916,ENSP00000378842,ENSP00000378843,ENSP00000402465,ENSP00000406992,ENST00000326912,ENST00000326925,ENST00000339314,ENST00000395457,ENST00000395458,ENST00000428548,ENST00000451…
NEDD1	9606.ENSP00000451211	https://smart.embl.de/smart/DDvec.cgi?smart=667:WD40(28|70)+WD40(74|112)+WD40(115|154)+WD40(156|198)+WD40(201|242)+WD40(245|283)+	Protein NEDD1; Required for mitosis progression. Promotes the nucleation of microtubules from the spindle; WD repeat domain containing	121441,A0A024RBE5,AAH27605.1,AC007564,AC013417,AK093221,AK303656,AK315821,B0AZN0,B4E145,BAC04099.1,BAF98712.1,BAG64657.1,BC027605,CCDS44955,CCDS44955.1,CCDS44956,CCDS44956.1,CCDS9063,CCDS9063.1,EAW97577.1,EAW97578.1,EAW97579.1,EAW97580.1,ENSG00000139350,ENSP00000266742,ENSP00000317857,ENSP00000345714,ENSP00000404978,ENSP00000407964,ENSP00000411307,ENSP00000450757,ENSP00000450828,ENSP00000450881,E…
NFKB1	9606.ENSP00000226574	https://smart.embl.de/smart/DDvec.cgi?smart=969:Pfam_RHD_DNA_bind(45|243)+IPT(250|351)+ANK(543|573)+ANK(582|611)+ANK(615|644)+ANK(651|680)+ANK(685|715)+ANK(719|748)+DEATH(806|893)+	Nuclear factor NF-kappa-B p105 subunit; NF-kappa-B is a pleiotropic transcription factor present in almost all cell types and is the endpoint of a series of signal transduction events that are initiated by a vast array of stimuli related to many biological processes such as inflammation, immunity, differentiation, cell growth, tumorigenesis and apoptosis. NF-kappa-B is a homo- or heterodimeric co…	1MDI,1MDJ,1MDK,1NFI,1SVC,2DBF,2O61,3GUT,4790,A0A024RDJ4,A8K5Y5,AAA36360.1,AAA36361.1,AAF35232.1,AAH33210.1,AAH51765.1,AAO30127.1,AK122850,AK291450,AY223820,Ankyrin repeat domain containing,B3KVE8,BAF84139.1,BAG53760.1,BC033210,BC051765,CAB004031,CAB94757.1,CAH18336.1,CCDS3657,CCDS3657.1,CCDS54783,CCDS54783.1,CHEMBL3251,CR749522,CVID12,D6RC45,D6RDI9,D6RF93,D6RH30,DNA-binding factor KBF1,EAX06135.1…
NIF3L1	9606.ENSP00000386394	https://smart.embl.de/smart/DDvec.cgi?smart=377:Pfam_NIF3(32|364)+	NIF3-like protein 1; May function as a transcriptional corepressor through its interaction with COPS2, negatively regulating the expression of genes involved in neuronal differentiation	60491,A0A024R3V5,A0A024R3V7,AAG14952.1,AAG43131.1,AAG44846.1,AAH07654.1,AAP84063.1,AAP84064.1,AAY14724.1,AB038949,AF060513,AF182416,AF283538,AK023378,AL834430,ALS2CR1,AY251943,AY251944,B8ZZI0,BAB14551.1,BAB32499.1,BC007654,C9JN42,CAH56370.1,CALS-7,CCDS42797,CCDS42797.1,CCDS46485,CCDS46485.1,CCDS46486,CCDS46486.1,DKFZP762L015,E7EXA3,EAW70224.1,EAW70225.1,EAW70226.1,EAW70227.1,ENSG00000196290,ENSP0…
NOP10	9606.ENSP00000332198	https://smart.embl.de/smart/DDvec.cgi?smart=64:Pfam_Nop10p(3|52)+	H/ACA ribonucleoprotein complex subunit 3; Required for ribosome biogenesis and telomere maintenance. Part of the H/ACA small nucleolar ribonucleoprotein (H/ACA snoRNP) complex, which catalyzes pseudouridylation of rRNA. This involves the isomerization of uridine such that the ribose is subsequently attached to C5, instead of the normal N1. Each rRNA can contain up to 100 pseudouridine ("psi") re…	55505,AAH08886.1,AAH63023.1,AB043103,AB043104,AC021822,BAA96107.1,BAA96133.1,BC008886,BC063023,CCDS10037,CCDS10037.1,DKCB1,ENSG00000182117,ENSP00000332198,ENSP00000453475,ENST00000328848,ENST00000557912,H/ACA ribonucleoprotein complex,H/ACA ribonucleoprotein complex subunit 3,H0YM60,HGNC:14378,HPA059198,LRG_345,LRG_345t1,MGC70651,NM_018648,NM_018648.3,NOLA3,NOP10,NOP10 ribonucleoprotein,NOP10 rib…
NSMCE1	9606.ENSP00000355077	https://smart.embl.de/smart/DDvec.cgi?smart=266:Pfam_SMC_Nse1(15|176)+Pfam_zf-RING-like(191|231)+	Non-structural maintenance of chromosomes element 1 homolog; Component of the SMC5-SMC6 complex, a complex involved in DNA double-strand breaks by homologous recombination. The complex may promote sister chromatid homologous recombination by recruiting the SMC1-SMC3 cohesin complex to double-strand breaks. The complex is required for telomere maintenance via recombination in ALT (alternative leng…	197370,2CT0,5HVQ,5WY5,AAF29011.1,AAF29015.1,AAH18938.4,AF161451,AF161455,BC018938,CCDS10628,CCDS10628.2,D3DWF6,EAW55756.1,EAW55757.1,ENSG00000169189,ENSP00000305518,ENSP00000310853,ENSP00000324381,ENSP00000325310,ENSP00000351638,ENSP00000355077,ENSP00000454726,ENSP00000455237,ENSP00000456053,ENSP00000456103,ENSP00000456754,ENSP00000457893,ENSP00000458859,ENST00000305217,ENST00000311505,ENST000003…
NUDT16	9606.ENSP00000422375	https://smart.embl.de/smart/DDvec.cgi?smart=227:Pfam_NUDIX(34|136)+	U8 snoRNA-decapping enzyme; RNA-binding and decapping enzyme that catalyzes the cleavage of the cap structure of snoRNAs and mRNAs in a metal- dependent manner. Part of the U8 snoRNP complex that is required for the accumulation of mature 5.8S and 28S rRNA. Has diphosphatase activity and removes m7G and/or m227G caps from U8 snoRNA and leaves a 5'monophosphate on the RNA. Catalyzes also the cleav…	131870,2XSQ,3.6.1.62,3.6.1.64,3COU,3MGM,AAH09546.1,AAH31215.2,AK055827,AK295852,AK304650,B4DIZ6,B4E3B4,BAB71024.1,BAG58658.1,BAG65426.1,BC009546,BC031215,BP199028,CCDS3070,CCDS3070.2,CCDS54640,CCDS54640.1,CCDS54641,CCDS54641.1,E9PED4,EC 3.6.1.62,EC 3.6.1.64,ENSG00000198585,ENSP00000352911,ENSP00000374483,ENSP00000422375,ENSP00000429274,ENSP00000440230,ENST00000359850,ENST00000389833,ENST000005028…
NUMA1	9606.ENSP00000377298	https://smart.embl.de/smart/DDvec.cgi?smart=2115:COIL(213|937)+COIL(962|1444)+COIL(1474|1699)+	Nuclear mitotic apparatus protein 1; Microtubule (MT)-binding protein that plays a role in the formation and maintenance of the spindle poles and the alignement and the segregation of chromosomes during mitotic cell division. Functions to tether the minus ends of MTs at the spindle poles, which is critical for the establishment and maintenance of the spindle poles. Plays a role in the establishme…	3RO2,4926,5GXW,A0A024R5G4,A0A024R5M9,AAC33408.1,AAD16994.1,AAH04165.1,AAH08345.1,AAH43499.1,AB208841,AB210007,AB621824,AF012302,AF110460,AP002490,BAD92078.1,BAE06089.1,BAK64159.1,BC004165,BC008345,BC043499,CAA77669.1,CAA77670.1,CCDS31633,CCDS31633.1,CCDS66156,CCDS66156.1,EAW74821.1,EAW74823.1,EAW74824.1,EAW74826.1,EAW74827.1,ENSG00000137497,ENSP00000260051,ENSP00000278702,ENSP00000278703,ENSP0000…
NUTF2	9606.ENSP00000219169	https://smart.embl.de/smart/DDvec.cgi?smart=127:Pfam_NTF2(10|121)+	Nuclear transport factor 2; Mediates the import of GDP-bound RAN from the cytoplasm into the nucleus which is essential for the function of RAN in cargo receptor-mediated nucleocytoplasmic transport. Thereby, plays indirectly a more general role in cargo receptor-mediated nucleocytoplasmic transport. Interacts with GDP-bound RAN in the cytosol, recruits it to the nuclear pore complex via its inte…	10204,1GY5,A0A024R6Y2,AAA85905.1,AAH02348.1,AK311822,B2R4G7,BAG34764.1,BC002348,CAA30278.1,CAG33218.1,CCDS10848,CCDS10848.1,CR456937,EAW83181.1,EAW83182.1,ENSG00000102898,ENSP00000219169,ENSP00000456428,ENSP00000457022,ENSP00000457989,ENSP00000464456,ENST00000219169,ENST00000567105,ENST00000568233,ENST00000568390,ENST00000568396,ENST00000569436,ENST00000570026,ENST00000587481,H3BRV9,HGNC:13722,HP…
PFDN1	9606.ENSP00000261813	https://smart.embl.de/smart/DDvec.cgi?smart=122:Pfam_Prefoldin_2(14|119)+	Prefoldin subunit 1; Binds specifically to cytosolic chaperonin (c-CPN) and transfers target proteins to it. Binds to nascent polypeptide chain and promotes folding in an environment in which there are many competing pathways for nonnative proteins; Prefoldin subunits	5201,AAH03620.1,AAH06202.1,AAH11869.1,AC011380,AK223394,AK315353,B2RD02,BAD97114.1,BAG37749.1,BC003620,BC006202,BC011869,CAA76759.1,CCDS4222,CCDS4222.1,D6RGG5,E5RGS4,EAW62071.1,ENSG00000113068,ENSP00000261813,ENSP00000426383,ENSP00000428707,ENST00000261813,ENST00000507185,ENST00000510217,ENST00000512707,ENST00000512925,ENST00000514611,ENST00000524074,HGNC:8866,HPA006499,NM_002622,NM_002622.4,NP_0…
PFDN6	9606.ENSP00000378563	https://smart.embl.de/smart/DDvec.cgi?smart=129:Pfam_Prefoldin_2(10|115)+	Prefoldin subunit 6; Binds specifically to cytosolic chaperonin (c-CPN) and transfers target proteins to it. Binds to nascent polypeptide chain and promotes folding in an environment in which there are many competing pathways for nonnative proteins; Prefoldin subunits	10471,AAH39033.1,AAH59783.1,AK312150,BAG35084.1,BC039033,BC059783,CAB09993.1,CCDS4773,CCDS4773.1,EAX03706.1,EAX03707.1,ENSG00000204220,ENSP00000363734,ENSP00000363735,ENSP00000363738,ENSP00000378563,ENSP00000378566,ENSP00000420135,ENST00000374606,ENST00000374607,ENST00000374610,ENST00000395131,ENST00000395134,ENST00000463584,ENST00000491382,H2-KE2,HGNC:4926,HKE2,HLA class II region expressed gene…
PIH1D1	9606.ENSP00000262265	https://smart.embl.de/smart/DDvec.cgi?smart=290:Pfam_PIH1(23|211)+Pfam_PIH1(206|285)+	PIH1 domain-containing protein 1; Involved in the assembly of C/D box small nucleolar ribonucleoprotein (snoRNP) particles. Recruits the SWI/SNF complex to the core promoter of rRNA genes and enhances pre-rRNA transcription. Mediates interaction of TELO2 with the R2TP complex which is necessary for the stability of MTOR and SMG1. Positively regulates the assembly and activity of the mTORC1 comple…	4PSF,4PSI,55011,AAH01108.1,AK000650,AK294687,AK304476,B4DGN7,B4E2X7,BAA91307.1,BAG57848.1,BAG65289.1,BC001108,CCDS12765,CCDS12765.1,ENSG00000104872,ENSP00000262265,ENSP00000406239,ENSP00000469087,ENSP00000469693,ENSP00000469793,ENSP00000470322,ENSP00000470445,ENSP00000470639,ENSP00000470875,ENSP00000470947,ENSP00000471275,ENSP00000472065,ENSP00000472571,ENSP00000472715,ENSP00000473095,ENSP0000047…
PPM1B	9606.ENSP00000282412	https://smart.embl.de/smart/DDvec.cgi?smart=479:PP2Cc(13|293)+	Protein phosphatase 1B; Enzyme with a broad specificity. Dephosphorylates CDK2 and CDK6 in vitro. Dephosphorylates PRKAA1 and PRKAA2. Inhibits TBK1-mediated antiviral signaling by dephosphorylating it at 'Ser- 172'. Plays an important role in the termination of TNF-alpha- mediated NF-kappa-B activation through dephosphorylating and inactivating IKBKB/IKKB; Belongs to the PP2C family	2P8E,3.1.3.16,5495,AAG02232.1,AAG49433.1,AAH12002.1,AAH64381.1,AAX88954.1,AAY89639.1,AAY89640.1,AAY89641.1,AC019129,AF136972,AF294792,AJ005801,AJ271832,AJ271835,AL833035,B8ZZF0,BC012002,BC064381,C9JIR6,CAA06704.1,CAC27992.1,CAC27993.1,CAH56319.1,CCDS1816,CCDS1816.1,CCDS1817,CCDS1817.1,CCDS1818,CCDS1818.1,CCDS46271,CCDS46271.1,CHEMBL2845,DQ023508,DQ023509,DQ023510,EAX00282.1,EAX00283.1,EC 3.1.3.16…
PPP1CA	9606.ENSP00000326031	https://smart.embl.de/smart/DDvec.cgi?smart=341:PP2Ac(41|311)+	Serine/threonine-protein phosphatase PP1-alpha catalytic subunit; Protein phosphatase that associates with over 200 regulatory proteins to form highly specific holoenzymes which dephosphorylate hundreds of biological targets. Protein phosphatase 1 (PP1) is essential for cell division, and participates in the regulation of glycogen metabolism, muscle contractility and protein synthesis. Involved i…	3.1.3.16,3E7A,3E7B,3EGG,3EGH,3HVQ,3N5U,3V4Y,4G9J,4MOV,4MOY,4MP0,4XPN,5499,5IOH,A6NNR3,AAA36475.1,AAA36508.1,AAB26015.1,AAH01888.1,AAH04482.1,AAH08010.1,AAP35275.1,AB462751,AB505433,AK313586,B2R908,BAG36355.1,BAH56195.1,BAH69084.1,BC001888,BC004482,BC008010,BT006629,C0STL0,C4TNW6,CAA50197.1,CAB004545,CCDS31618,CCDS31618.1,CCDS8160,CCDS8160.1,CCDS8161,CCDS8161.1,CHEMBL2164,E9PMD7,EC 3.1.3.16,ENSG00…
PSMA1	9606.ENSP00000414359	https://smart.embl.de/smart/DDvec.cgi?smart=269:Proteasome_A_N(12|34)+Pfam_Proteasome(35|221)+	Proteasome subunit alpha type-1; Component of the 20S core proteasome complex involved in the proteolytic degradation of most intracellular proteins. This complex plays numerous essential roles within the cell by associating with different regulatory particles. Associated with two 19S regulatory particles, forms the 26S proteasome and thus participates in the ATP-dependent degradation of ubiquiti…	3.4.25.1,30 kDa prosomal protein,4R3O,4R67,5682,5A0Q,5GJQ,5GJR,5L4G,5LE5,5LEX,5LEY,5LEZ,5LF0,5LF1,5LF3,5LF4,5LF6,5LF7,5LN3,5T0C,5T0G,5T0H,5T0I,5T0J,A8K400,AAA92734.1,AAH02577.1,AAH05932.1,AAH08472.1,AAH09576.1,AAH15105.1,AAH15356.1,AAH22372.1,AAP35293.1,AK290765,BAA00656.1,BAF83454.1,BC002577,BC005932,BC008472,BC009576,BC015105,BC015356,BC022372,BT006647,CAA43961.1,CCDS31431,CCDS31431.1,CCDS7816,…
PSMA3	9606.ENSP00000216455	https://smart.embl.de/smart/DDvec.cgi?smart=255:Proteasome_A_N(8|30)+Pfam_Proteasome(31|217)+	Proteasome subunit alpha type-3; Component of the 20S core proteasome complex involved in the proteolytic degradation of most intracellular proteins. This complex plays numerous essential roles within the cell by associating with different regulatory particles. Associated with two 19S regulatory particles, forms the 26S proteasome and thus participates in the ATP-dependent degradation of ubiquiti…	3.4.25.1,4R3O,4R67,5684,5A0Q,5DSV,5GJQ,5GJR,5L4G,5LE5,5LEX,5LEY,5LEZ,5LF0,5LF1,5LF3,5LF4,5LF6,5LF7,5LN3,5M32,5T0C,5T0G,5T0H,5T0I,5T0J,AAH05265.1,AAH29402.1,AAH38990.1,AAP35357.1,AAV38520.1,AK315158,B2RCK6,BAA00659.1,BAG37603.1,BC005265,BC029402,BC038990,BT006711,BT019715,CCDS45113,CCDS45113.1,CCDS9731,CCDS9731.1,D00762,EAW80719.1,EC 3.4.25.1,ENSG00000100567,ENSP00000216455,ENSP00000339177,ENSP000…
PSMA4	9606.ENSP00000044462	https://smart.embl.de/smart/DDvec.cgi?smart=261:Proteasome_A_N(5|27)+Pfam_Proteasome(28|216)+COIL(226|261)+	Proteasome subunit alpha type-4; Component of the 20S core proteasome complex involved in the proteolytic degradation of most intracellular proteins. This complex plays numerous essential roles within the cell by associating with different regulatory particles. Associated with two 19S regulatory particles, forms the 26S proteasome and thus participates in the ATP-dependent degradation of ubiquiti…	3.4.25.1,4R3O,4R67,5685,5A0Q,5GJQ,5GJR,5L4G,5LE5,5LEX,5LEY,5LEZ,5LF0,5LF1,5LF3,5LF4,5LF6,5LF7,5LN3,5M32,5T0C,5T0G,5T0H,5T0I,5T0J,611385,AAH05361.1,AAH22445.1,AAH22817.2,AAH47667.1,AAH56249.1,AAH93069.1,AAP88786.1,BAA00660.1,BC005361,BC022445,BC022817,BC047667,BC056249,BC093069,BT009784,CAB004973,CCDS10303,CCDS10303.1,CCDS45319,CCDS45319.1,D00763,D3DW86,EAW99163.1,EAW99164.1,EC 3.4.25.1,ENSG000000…
PSMA6	9606.ENSP00000261479	https://smart.embl.de/smart/DDvec.cgi?smart=246:Proteasome_A_N(9|31)+Pfam_Proteasome(32|220)+	Proteasome subunit alpha type-6; Component of the 20S core proteasome complex involved in the proteolytic degradation of most intracellular proteins. This complex plays numerous essential roles within the cell by associating with different regulatory particles. Associated with two 19S regulatory particles, forms the 26S proteasome and thus participates in the ATP-dependent degradation of ubiquiti…	27 kDa prosomal protein,3.4.25.1,4R3O,4R67,5687,5A0Q,5GJQ,5GJR,5L4G,5LE5,5LEX,5LEY,5LEZ,5LF0,5LF1,5LF3,5LF4,5LF6,5LF7,5LN3,5M32,5T0C,5T0G,5T0H,5T0I,5T0J,AAG61139.1,AAH02979.1,AAH17882.1,AAH22354.1,AAH23659.1,AAH70137.1,AF332577,AK298920,AK302008,AK313011,AK316223,AL121594,B2R7J9,B4DQR4,B4DXJ9,BAG35846.1,BAG61026.1,BAG63411.1,BAH14594.1,BC002979,BC017882,BC022354,BC023659,BC070137,CAA42052.1,CAA43…
PSMA7	9606.ENSP00000359910	https://smart.embl.de/smart/DDvec.cgi?smart=248:Proteasome_A_N(3|25)+Pfam_Proteasome(26|211)+	Proteasome subunit alpha type-7; Component of the 20S core proteasome complex involved in the proteolytic degradation of most intracellular proteins. This complex plays numerous essential roles within the cell by associating with different regulatory particles. Associated with two 19S regulatory particles, forms the 26S proteasome and thus participates in the ATP-dependent degradation of ubiquiti…	3.4.25.1,4R3O,4R67,5688,5A0Q,5GJQ,5GJR,5L4G,5LE5,5LEX,5LEY,5LEZ,5LF0,5LF1,5LF3,5LF4,5LF6,5LF7,5LN3,5M32,5T0C,5T0G,5T0H,5T0I,5T0J,AAB81515.1,AAC99402.1,AAH04427.1,AAP35829.1,AF022815,AF054185,AK312025,B2R515,BAG34962.1,BC004427,BI906714,BT007165,C6,CAC04017.1,CAC04018.1,CCDS13489,CCDS13489.1,EAW75398.1,EC 3.4.25.1,ENSG00000101182,ENSP00000217153,ENSP00000345965,ENSP00000359895,ENSP00000359897,ENSP…
PSMB1	9606.ENSP00000262193	https://smart.embl.de/smart/DDvec.cgi?smart=241:Pfam_Proteasome(34|226)+	Proteasome subunit beta type-1; Component of the 20S core proteasome complex involved in the proteolytic degradation of most intracellular proteins. This complex plays numerous essential roles within the cell by associating with different regulatory particles. Associated with two 19S regulatory particles, forms the 26S proteasome and thus participates in the ATP-dependent degradation of ubiquitin…	3.4.25.1,4R3O,4R67,5689,5A0Q,5GJQ,5GJR,5L4G,5L5B,5L5D,5L5E,5L5F,5L5H,5L5I,5L5J,5L5O,5L5P,5L5Q,5L5R,5L5S,5L5T,5L5U,5L5V,5L5W,5L5X,5L5Y,5L5Z,5L60,5L61,5L62,5L63,5L64,5LE5,5LEX,5LEY,5LEZ,5LF0,5LF1,5LF3,5LF4,5LF6,5LF7,5LN3,5M2B,5M32,5T0C,5T0G,5T0H,5T0I,5T0J,AAH00508.1,AAH20807.1,AAV38525.1,AB451312,AB451442,AL031259,B5BU76,BAA00658.1,BAG70126.1,BAG70256.1,BC000508,BC020807,BT019720,CAA20287.1,CAB0339…
PSMB2	9606.ENSP00000362334	https://smart.embl.de/smart/DDvec.cgi?smart=201:Pfam_Proteasome(3|183)+	Proteasome subunit beta type-2; Component of the 20S core proteasome complex involved in the proteolytic degradation of most intracellular proteins. This complex plays numerous essential roles within the cell by associating with different regulatory particles. Associated with two 19S regulatory particles, forms the 26S proteasome and thus participates in the ATP-dependent degradation of ubiquitin…	3.4.25.1,4R3O,4R67,5690,5A0Q,5GJQ,5GJR,5L4G,5LE5,5LEX,5LEY,5LEZ,5LF0,5LF1,5LF3,5LF4,5LF6,5LF7,5LN3,5M32,5T0C,5T0G,5T0H,5T0I,5T0J,AAI01837.1,AAI05127.1,AAI07902.1,AAP35801.1,AL157951,AL357035,BAA05646.1,BC101836,BC105126,BC107901,BT007137,CAC36031.2,CAG33143.1,CAI22074.1,CAI23521.1,CCDS394,CCDS394.1,CCDS72755,CCDS72755.1,CHEMBL3492,CR456862,D26599,D3DPS0,EAX07406.1,EAX07407.1,EC 3.4.25.1,ENSG00000…
PSMD4	9606.ENSP00000357879	https://smart.embl.de/smart/DDvec.cgi?smart=377:VWA(2|188)+UIM(211|230)+UIM(282|301)+	26S proteasome non-ATPase regulatory subunit 4; Component of the 26S proteasome, a multiprotein complex involved in the ATP-dependent degradation of ubiquitinated proteins. This complex plays a key role in the maintenance of protein homeostasis by removing misfolded or damaged proteins, which could impair cellular functions, and by removing proteins whose functions are no longer required. Therefo…	1P9C,1P9D,1UEL,1YX4,1YX5,1YX6,26S proteasome non-ATPase regulatory subunit 4,26S proteasome regulatory subunit RPN10,26S proteasome regulatory subunit S5A,2KDE,2KDF,5710,5GJQ,5GJR,5L4K,5LN3,5M32,5T0C,5T0G,5T0H,5T0I,5T0J,5VGZ,5VHF,5VHH,5VHI,5VHS,A6PVX3,AAB54057.1,AAB68598.1,AAC50433.1,AAH02365.1,AAH72008.1,AB033605,AF,AF-1,ASF,Antisecretory factor 1,BAA97581.1,BC002365,BC072008,CAB047300,CAH70329.…
PSMD9	9606.ENSP00000440485	https://smart.embl.de/smart/DDvec.cgi?smart=223:COIL(21|47)+PDZ(122|196)+	26S proteasome non-ATPase regulatory subunit 9; Acts as a chaperone during the assembly of the 26S proteasome, specifically of the base subcomplex of the PA700/19S regulatory complex (RC). During the base subcomplex assembly is part of an intermediate PSMD9:PSMC6:PSMC3 module, also known as modulator trimer complex; PSMD9 is released during the further base assembly process; PDZ domain containing	26S proteasome non-ATPase regulatory subunit 9,26S proteasome regulatory subunit p27,5715,AAH02383.1,AAH04184.1,AAH04213.1,AB003177,AK315389,B2RD35,BAA19790.1,BAG37782.1,BC002383,BC004184,BC004213,CB111716,CCDS58284,CCDS58284.1,CCDS9225,CCDS9225.1,EAW98296.1,ENSG00000110801,ENSP00000261817,ENSP00000326790,ENSP00000326990,ENSP00000340847,ENSP00000440485,ENSP00000440500,ENSP00000442210,ENSP00000443…
PTRHD1	9606.ENSP00000330389	https://smart.embl.de/smart/DDvec.cgi?smart=140:Pfam_PTH2(25|139)+	peptidyl-tRNA hydrolase domain containing 1	391356,AAH73803.1,BC073803,C2orf79,CCDS33156,CCDS33156.1,EAX00745.1,ENSG00000184924,ENSP00000330389,ENST00000328379,ENST00000467797,ENST00000474668,ENST00000480190,ENST00000487316,ENST00000492046,HGNC:33782,HPA019951,LOC391356,NM_001013663,NM_001013663.1,NP_001013685,NP_001013685.1,NX_Q6GMV3,OMIM:617342,OTTHUMG00000151978,OTTHUMP00000200875,OTTHUMT00000324626,OTTHUMT00000324627,OTTHUMT00000324628…
RPL11	9606.ENSP00000363676	https://smart.embl.de/smart/DDvec.cgi?smart=178:Pfam_Ribosomal_L5(10|63)+Pfam_Ribosomal_L5_C(67|165)+	60S ribosomal protein L11; Component of the ribosome, a large ribonucleoprotein complex responsible for the synthesis of proteins in the cell. The small ribosomal subunit (SSU) binds messenger RNAs (mRNAs) and translates the encoded message by selecting cognate aminoacyl- transfer RNA (tRNA) molecules. The large subunit (LSU) contains the ribosomal catalytic site termed the peptidyl transferase c…	4UG0,4V6X,4XXB,5AJ0,5LKS,5T2C,60S ribosomal protein L11,6135,AAC15856.1,AAD20460.3,AAH18970.1,AAL99919.1,AB007171,AF101385,AF432212,AK311816,AL451000,BAA25831.1,BAG34759.1,BC018970,CAA55816.1,CCDS238,CCDS238.1,CLL-associated antigen KW-12,DBA7,EAW95068.1,ENSG00000142676,ENSP00000270799,ENSP00000363676,ENSP00000390839,ENSP00000398888,ENST00000270799,ENST00000374550,ENST00000443624,ENST00000458455,…
RPL37A	9606.ENSP00000418082	https://smart.embl.de/smart/DDvec.cgi?smart=92:Pfam_Ribosomal_L37ae(4|88)+	Ribosomal protein L37a	4UG0,4V6X,5AJ0,5LKS,5T2C,60S ribosomal protein L37a,6168,AAA60280.1,AAH00555.2,AAH14262.1,AAH16748.1,AAH63476.1,AAH67789.1,AAH82239.1,AAY15078.1,AC073321,AK289472,AK291857,BAF82161.1,BAF84546.1,BC000555,BC014262,BC016748,BC063476,BC067789,BC082239,C9J4Z3,CAA47244.1,CAG46949.1,CCDS2404,CCDS2404.1,CR542152,E9PEL3,EAW70569.1,EAW70570.1,EAW70571.1,ENSG00000197756,ENSP00000352709,ENSP00000388690,ENSP0…
RQCD1	9606.ENSP00000273064	https://smart.embl.de/smart/DDvec.cgi?smart=299:Pfam_Rcd1(25|283)+	CCR4-NOT transcription complex subunit 9; Component of the CCR4-NOT complex which is one of the major cellular mRNA deadenylases and is linked to various cellular processes including bulk mRNA degradation, miRNA-mediated repression, translational repression during translational initiation and general transcription regulation. Additional complex functions may be a consequence of its influence on m…	2FV2,4CRU,4CRV,4CT6,4CT7,5LSW,9125,AAH07102.2,AAI37456.1,AAI37457.1,AB500892,AK293281,AK296037,B2RPI0,B4DJE1,B5MDQ4,B7Z1E5,BAA13508.1,BAG58803.1,BAH11481.1,BAJ07307.1,BC007102,BC137455,BC137456,CAF40,CCDS33379.1,CCDS63123.1,CCR4-NOT transcription complex subunit 9,CNOT9,CNOT9_HUMAN,CT129,Cell differentiation protein RQCD1 homolog,D5MQE1,D87957,EAW70624.1,EAW70625.1,ENSG00000144580,ENSP00000273064…
SCAF11	9606.ENSP00000358374	https://smart.embl.de/smart/DDvec.cgi?smart=1463:RING(41|81)+	Protein SCAF11; Plays a role in pre-mRNA alternative splicing by regulating spliceosome assembly; Ring finger proteins	9169,A6NEU9,A6NLW5,A8MTP4,A8MUK0,AAC39565.1,AAH40951.1,AC000015,AC084878,AF030234,BC040951,CAA72121.1,CASP11,CCDS8748,CCDS8748.2,CTD-associated SR protein 11,EAW57892.1,EAW57894.1,ENSG00000139218,ENSP00000266589,ENSP00000317200,ENSP00000320195,ENSP00000322572,ENSP00000322976,ENSP00000338498,ENSP00000351455,ENSP00000358374,ENSP00000378839,ENSP00000378840,ENSP00000405488,ENSP00000413036,ENSP0000044…
SEC13	9606.ENSP00000373312	https://smart.embl.de/smart/DDvec.cgi?smart=368:WD40(47|87)+WD40(92|133)+WD40(138|179)+WD40(185|241)+WD40(247|290)+WD40(300|336)+	Protein SEC13 homolog; Functions as a component of the nuclear pore complex (NPC) and the COPII coat. At the endoplasmic reticulum, SEC13 is involved in the biogenesis of COPII-coated vesicles; Belongs to the WD repeat SEC13 family	3BG0,3BG1,5A9Q,6396,A4UCS7,A8MV37,A8MXL6,AAH02634.2,AAH06167.1,AAH91506.1,ABO65080.1,AF052155,AK301999,B4DXJ1,BAG63403.1,BC002634,BC006167,BC091506,C9J0S2,C9JBJ5,C9JIB6,CCDS2599,CCDS2599.1,CCDS46751,CCDS46751.1,CCDS63540,CCDS63540.1,D3S1231E,E7ERC8,EF036494,ENSG00000157020,ENSP00000287659,ENSP00000312122,ENSP00000324382,ENSP00000336566,ENSP00000342834,ENSP00000373312,ENSP00000380287,ENSP000003802…
SEC61G	9606.ENSP00000388337	https://smart.embl.de/smart/DDvec.cgi?smart=68:Pfam_SecE(12|65)+	Protein transport protein Sec61 subunit gamma; Necessary for protein translocation in the endoplasmic reticulum; Belongs to the SecE/SEC61-gamma family	23480,A0A024QYZ0,AAC99401.1,AAH09480.1,AAH51840.1,AF054184,AF086539,AK311845,B2R4J0,BAG34787.1,BC009480,BC051840,CAG33260.1,CCDS5513,CCDS5513.1,CR456979,EAW50960.1,EAW50961.1,ENSG00000132432,ENSP00000254768,ENSP00000341538,ENSP00000378906,ENSP00000388337,ENSP00000409884,ENST00000254768,ENST00000349573,ENST00000352861,ENST00000395535,ENST00000415949,ENST00000450622,ENST00000460484,ENST00000461536,…
SMARCC2	9606.ENSP00000267064	https://smart.embl.de/smart/DDvec.cgi?smart=1214:CHROMO(186|235)+Pfam_SWIRM(427|512)+SANT(597|645)+Pfam_SWIRM-assoc_3(684|750)+Pfam_SWIRM-assoc_1(863|946)+	SWI/SNF complex subunit SMARCC2; Involved in transcriptional activation and repression of select genes by chromatin remodeling (alteration of DNA-nucleosome topology). Component of SWI/SNF chromatin remodeling complexes that carry out key enzymatic activities, changing chromatin structure by altering DNA-histone contacts within a nucleosome in an ATP-dependent manner. Can stimulate the ATPase act…	6601,A0A024RB22,AAC50694.1,AAH09067.1,AAH13045.1,AAH26222.1,AAP88926.1,AB209006,BAD92243.1,BAF complex,BAF170,BC009067,BC013045,BC026222,BRG1-associated factor 170,BT009924,CAB004321,CCDS55835,CCDS55835.1,CCDS81698,CCDS8907,CCDS8907.1,CCDS8908,CCDS8908.1,CRACC2,EAW96906.1,EAW96907.1,ENSG00000139613,ENSP00000267064,ENSP00000302919,ENSP00000377591,ENSP00000416612,ENSP00000447680,ENSP00000449396,ENS…
SNX6	9606.ENSP00000355217	https://smart.embl.de/smart/DDvec.cgi?smart=418:Pfam_PX(41|182)+Pfam_Vps5(196|411)+	Sorting nexin-6; Involved in several stages of intracellular trafficking. Interacts with membranes phosphatidylinositol 3,4-bisphosphate and/or phosphatidylinositol 4,5-bisphosphate (Probable). Acts in part as component of the retromer membrane-deforming SNX-BAR subcomplex. The SNX-BAR retromer mediates retrograde transport of cargo proteins from endosomes to the trans-Golgi network (TGN) and is …	58533,AAD24202.1,AAD27829.1,AAH01798.1,AAQ13512.1,AF109364,AF121856,AK021456,AL445363,AL445883,BAG51034.1,BC001798,C0H5W9,CCDS41942,CCDS41942.1,CCDS9648,CCDS9648.1,EAW65913.1,EAW65915.1,ENSG00000129515,ENSP00000267363,ENSP00000318720,ENSP00000338459,ENSP00000345987,ENSP00000347230,ENSP00000348576,ENSP00000355217,ENSP00000379779,ENSP00000379785,ENSP00000450863,ENSP00000451415,ENSP00000452082,ENSP0…
SRSF7	9606.ENSP00000325905	https://smart.embl.de/smart/DDvec.cgi?smart=238:RRM(12|80)+ZnF_C2HC(105|121)+	Serine/arginine-rich splicing factor 7; Required for pre-mRNA splicing. Can also modulate alternative splicing in vitro. Represses the splicing of MAPT/Tau exon 10. May function as export adapter involved in mRNA nuclear export such as of histone H2A. Binds mRNA which is thought to be transferred to the NXF1-NXT1 heterodimer for export (TAP/NXF1 pathway); enhances NXF1-NXT1 RNA-binding activity. …	2HVZ,6432,9G8,AAA35495.1,AAA88098.1,AAG3,AAH00997.1,AAH17369.1,AAH17908.1,AAH22328.1,AAN87842.1,AAP35391.1,AAT08040.1,AAX93102.1,AB445102,AK297161,AY166860,AY513287,B4DLU6,BAG59658.1,BAI99737.1,BC000997,BC017369,BC017908,BC022328,BT006745,C9JAB2,CCDS33183,CCDS33183.1,CCDS56115,CCDS56115.1,EAX00365.1,EAX00366.1,ENSG00000115875,ENSP00000263920,ENSP00000325905,ENSP00000341717,ENSP00000368134,ENSP000…
TCEB1	9606.ENSP00000478121	https://smart.embl.de/smart/DDvec.cgi?smart=112:Skp1(16|112)+	Elongin-C; SIII, also known as elongin, is a general transcription elongation factor that increases the RNA polymerase II transcription elongation past template-encoded arresting sites. Subunit A is transcriptionally active and its transcription activity is strongly enhanced by binding to the dimeric complex of the SIII regulatory subunits B and C (elongin BC complex). In embryonic stem cells, th…	1LM8,1LQB,1VCB,2C9W,2IZV,2MA9,3DCG,3ZKJ,3ZNG,3ZRC,3ZRF,3ZTC,3ZTD,3ZUN,4AJY,4AWJ,4B95,4B9K,4BKS,4BKT,4N9F,4W9C,4W9D,4W9E,4W9F,4W9G,4W9H,4W9I,4W9J,4W9K,4W9L,4WQO,5BO4,5LLI,5N4W,5NVV,5NVW,5NVX,5NVY,5NVZ,5NW0,5NW1,5NW2,5T35,6921,A0A024R7Y5,AAA67650.1,AAH13809.1,AAH93065.1,AAI00029.1,AAI00284.1,BC013809,BC093065,BC100028,BC100283,BX649138,CCDS34910.1,CCDS56539.1,E5RGD9,E5RHG8,EAW87015.1,EAW87016.1,EAW…
TRA2A	9606.ENSP00000297071	https://smart.embl.de/smart/DDvec.cgi?smart=282:RRM(120|193)+	Transformer-2 protein homolog alpha; Sequence-specific RNA-binding protein which participates in the control of pre-mRNA splicing	29896,AAC50658.1,AAH17094.1,AAQ96870.1,AB097048,AC023105,AK298815,AK300565,AK300741,AK314801,AWMS1,B4DQI6,B4DUA9,BAC77401.1,BAG37329.1,BAG60948.1,BAG62271.1,BAG62410.1,BC017094,CCDS5383,CCDS5383.1,CCDS64609,CCDS64609.1,CCDS75569,CCDS75569.1,E9PD75,EAW93788.1,ENSG00000164548,ENSP00000297071,ENSP00000376290,ENSP00000413898,ENSP00000441116,ENSP00000480822,ENST00000297071,ENST00000392502,ENST00000448…
TUBA1C	9606.ENSP00000301072	https://smart.embl.de/smart/DDvec.cgi?smart=449:Tubulin(49|246)+Tubulin_C(248|393)+COIL(414|441)+	Tubulin alpha-1C chain; Tubulin is the major constituent of microtubules. It binds two moles of GTP, one at an exchangeable site on the beta chain and one at a non-exchangeable site on the alpha chain; Belongs to the tubulin family	84790,AAH04949.1,AAH05946.1,AAH11790.1,AAH19298.1,AAH21088.1,AAH51297.1,AAH63036.1,Alpha-tubulin 6,BC004949,BC005946,BC011790,BC019298,BC021088,BC051297,BC063036,CCDS76556,CCDS8782,CCDS8782.1,ENSG00000167553,ENSP00000301072,ENSP00000322707,ENSP00000351411,ENSP00000443475,ENSP00000447669,ENSP00000447910,ENSP00000448211,ENSP00000448646,ENST00000301072,ENST00000318973,ENST00000321665,ENST00000541364…
TUBB	9606.ENSP00000339001	https://smart.embl.de/smart/DDvec.cgi?smart=444:Tubulin(47|244)+Tubulin_C(246|383)+COIL(405|436)+	Tubulin beta chain; Tubulin is the major constituent of microtubules. It binds two moles of GTP, one at an exchangeable site on the beta chain and one at a non-exchangeable site on the alpha chain; Tubulins	203068,3QNZ,3QO0,5N5N,AB062393,CAB005417,CAB012406,CCDS4687,CCDS4687.1,CCDS78124,CDCBM6,CSCSC1,ENSG00000196230,ENSP00000328808,ENSP00000339001,ENSP00000365578,ENSP00000365579,ENSP00000379668,ENSP00000379672,ENSP00000391672,ENSP00000399893,ENSP00000399990,ENSP00000442075,ENST00000327892,ENST00000328974,ENST00000330914,ENST00000376397,ENST00000396384,ENST00000396389,ENST00000422827,ENST00000435534,…
UBE2V2	9606.ENSP00000428209	https://smart.embl.de/smart/DDvec.cgi?smart=145:UBCc(13|145)+	Ubiquitin-conjugating enzyme E2 variant 2; Has no ubiquitin ligase activity on its own. The UBE2V2/UBE2N heterodimer catalyzes the synthesis of non-canonical poly-ubiquitin chains that are linked through 'Lys-63'. This type of poly-ubiquitination does not lead to protein degradation by the proteasome. Mediates transcriptional activation of target genes. Plays a role in the control of progress thr…	1J74,1J7D,1ZGU,3VON,4NR3,4NRG,4NRI,4ONL,4ONM,4ONN,4ORH,5AIT,7336,A0M8W4,AAB04758.2,AAC05381.1,AAH07051.1,AAH16332.1,AAH16710.1,AAH28673.1,AAH62418.1,AAP35390.1,AAY16979.1,AC021236,AF049140,AK313447,BAG36236.1,BC007051,BC016332,BC016710,BC028673,BC062418,BT006744,CAA66717.1,CAG28556.1,CCDS43738,CCDS43738.1,CR407628,DDVIT1,DDVit 1,DDVit-1,DQ003720,EAW86687.1,EAW86688.1,EAW86689.1,EDAF-1,EDPF-1,EDPF…
UPF2	9606.ENSP00000348708	https://smart.embl.de/smart/DDvec.cgi?smart=1272:COIL(54|134)+MIF4G(168|364)+COIL(516|543)+MIF4G(569|758)+MIF4G(773|986)+Pfam_Upf2(1069|1218)+	Regulator of nonsense transcripts 2; Involved in nonsense-mediated decay (NMD) of mRNAs containing premature stop codons by associating with the nuclear exon junction complex (EJC). Recruited by UPF3B associated with the EJC core at the cytoplasmic side of the nuclear envelope and the subsequent formation of an UPF1-UPF2-UPF3 surveillance complex (including UPF1 bound to release factors at the st…	1UW4,26019,2WJV,4CEK,4CEM,A6NLJ5,AAG33225.1,AAG48509.1,AAG60689.1,AAI14965.1,AAI15738.1,AB037829,AF301013,AF318574,AK000764,AK096191,AK295209,AL080198,AL645617,AY013249,B4DHP3,BAA91369.1,BAA92646.1,BAC04721.1,BAG58205.1,BC114964,BC115737,CAB45771.1,CAH73458.1,CAH73459.1,CAI16755.1,CAI16756.1,CCDS7086,CCDS7086.1,D3DRS0,DKFZP434D222,EAW86329.1,EAW86330.1,EAW86332.1,EAW86333.1,ENSG00000151461,ENSP00…
VBP1	9606.ENSP00000286428	https://smart.embl.de/smart/DDvec.cgi?smart=197:Pfam_Prefoldin(60|182)+	Prefoldin subunit 3; Binds specifically to cytosolic chaperonin (c-CPN) and transfers target proteins to it. Binds to nascent polypeptide chain and promotes folding in an environment in which there are many competing pathways for nonnative proteins; Prefoldin subunits	7411,AAC23907.1,AAC50617.1,AAH46094.1,AAV38411.1,AK301646,AK313420,AL356738,B2R8L5,B4DWR3,BAG36212.1,BAG63125.1,BC046094,BT019604,CAA76761.1,CAB006260,CAG46730.1,CAI41469.1,CCDS14765,CCDS14765.1,CCDS78525,CR541932,D3DWY7,EAW72627.1,EAW72628.1,EAW72630.1,ENSG00000155959,ENSP00000286428,ENSP00000358467,ENSP00000438694,ENST00000286428,ENST00000369455,ENST00000459836,ENST00000460509,ENST00000535916,H…
VMA21	9606.ENSP00000333255	https://smart.embl.de/smart/DDvec.cgi?smart=101:Pfam_VMA21(25|88)+	Vacuolar ATPase assembly integral membrane protein VMA21; Required for the assembly of the V0 complex of the vacuolar ATPase (V-ATPase) in the endoplasmic reticulum	203547,A6NKV7,AAI03702.1,AAI03703.1,AAI05694.1,AAI05695.1,AAI10801.1,AF003627,AK096835,B3KUA9,BAG53371.1,BC103701,BC103702,BC105693,BC105694,BC110800,CCDS35430,CCDS35430.1,ENSG00000160131,ENSP00000298664,ENSP00000333255,ENSP00000359386,ENSP00000394587,ENST00000298664,ENST00000330374,ENST00000370361,ENST00000456920,ENST00000477649,HGNC:22082,HPA010972,Hs.58633,Hs.605484,Hs.695310,MEAX,Myopathy wit…
VTI1A	9606.ENSP00000376792	https://smart.embl.de/smart/DDvec.cgi?smart=217:Pfam_V-SNARE(12|90)+t_SNARE(117|184)+TRANS(193|215)+	Vesicle transport through interaction with t-SNAREs homolog 1A; V-SNARE that mediates vesicle transport pathways through interactions with t-SNAREs on the target membrane. These interactions are proposed to mediate aspects of the specificity of vesicle trafficking and to promote fusion of the lipid bilayers. Involved in vesicular transport from the late endosomes to the trans-Golgi network. Along…	143187,A2A307,AAH17052.1,AC022018,AK303646,AL139120,B4E137,BAG64649.1,BC017052,CAH71781.2,CAM15142.1,CAM22437.1,CCDS7575,CCDS7575.2,EAW49524.1,EAW49525.1,ENSG00000151532,ENSP00000281221,ENSP00000346071,ENSP00000358406,ENSP00000376792,ENSP00000395017,ENST00000281221,ENST00000313595,ENST00000369399,ENST00000393077,ENST00000432306,ENST00000472892,ENST00000480057,ENST00000483122,ENST00000489142,ENST0…
WDR48	9606.ENSP00000307491	https://smart.embl.de/smart/DDvec.cgi?smart=677:WD40(14|58)+WD40(64|103)+WD40(106|145)+WD40(157|196)+WD40(199|238)+WD40(241|280)+WD40(350|388)+Pfam_DUF3337(509|674)+	WD repeat-containing protein 48; Regulator of deubiquitinating complexes. Acts as a strong activator of USP1 and USP46. Enhances the USP1-mediated deubiquitination of FANCD2; USP1 being almost inactive by itself. Also activates deubiquitinating activity of complexes containing USP12. Docks at the distal end of the USP12 fingers domain and induces a cascade of structural changes leading to the act…	57599,5CVL,5CVN,5CVO,5K1A,5K1B,5K1C,5L8E,5L8W,A0A024R2L1,AAH26353.1,AAH37168.1,AAL78650.1,AB040882,AC123903,AF468833,AK297349,AK298810,AK302307,AL162064,AL832926,B4DM86,B4DQI2,B4DY84,BAA95973.2,BAG59798.1,BAG60944.1,BAG63646.1,BC026353,BC037168,BX649170,C9JC24,CAB82402.1,CAH56182.1,CAH56300.1,CCDS33738,CCDS33738.1,EAW64550.1,EAW64551.1,ENSG00000114742,ENSP00000307491,ENSP00000379557,ENSP000003887…
XPO1	9606.ENSP00000384863	https://smart.embl.de/smart/DDvec.cgi?smart=1071:IBN_N(46|112)+Pfam_Xpo1(123|268)+CRM1_C(709|1027)+	Exportin-1; Mediates the nuclear export of cellular proteins (cargos) bearing a leucine-rich nuclear export signal (NES) and of RNAs. In the nucleus, in association with RANBP3, binds cooperatively to the NES on its target protein and to the GTPase RAN in its active GTP-bound form (Ran-GTP). Docking of this complex to the nuclear pore complex (NPC) is mediated through binding to nucleoporins. Upo…	1W9C,2L1L,3GB8,4BSM,4BSN,5DIS,7514,A6NL14,A8K1K5,AAH32847.1,AAY14949.1,AC016727,AK124769,AK289920,AK316481,B3KWD0,B7ZB16,BAA23415.1,BAF82609.1,BAG54092.1,BAH14852.1,BC032847,BX647758,C9IYM2,C9IZS4,C9J673,C9JF49,C9JKM9,C9JQ02,C9JV99,CAA69905.2,CAB010184,CAH18695.1,CAH56174.1,CCDS33205,CCDS33205.1,CHEMBL5661,CR749840,CRM1,Chromosome region maintenance 1 protein homolog,D6W5E2,D89729,EAW99993.1,EAW9…
ZBTB8OS	9606.ENSP00000417677	https://smart.embl.de/smart/DDvec.cgi?smart=179:Pfam_Archease(43|179)+	Protein archease; Component of the tRNA-splicing ligase complex required to facilitate the enzymatic turnover of catalytic subunit RTCB. Together with DDX1, acts by facilitating the guanylylation of RTCB, a key intermediate step in tRNA ligation; Belongs to the archease family	339487,A8K0B5,AAH58843.1,AAM34477.1,AAM34478.1,AAN75223.1,AAN75224.1,AK289480,AL138800,ARCH,ARCH2,ARCH_HUMAN,AY099493,AY099494,AY151084,AY151085,BAF82169.1,BC058843,CAI20020.1,CAI20021.1,CCDS365,CCDS365.1,CCDS76134,CCDS81292,D3DPQ2,EAX07517.1,EAX07519.1,ENSG00000176261,ENSP00000316787,ENSP00000343760,ENSP00000362600,ENSP00000362605,ENSP00000413485,ENSP00000417677,ENSP00000474993,ENSP00000477945,E…
ZC3H13	9606.ENSP00000282007	https://smart.embl.de/smart/DDvec.cgi?smart=1564:ZnF_C3H1(36|63)+COIL(162|197)+COIL(645|789)+COIL(1339|1366)+	Zinc finger CCCH domain-containing protein 13; Acts as component of the WTAP complex that is involved in RNA processing and cell cycle	23091,A2A323,AAP37483.1,AB020660,AL136745,AL445232,AL831833,AY283618,BAA74876.1,CAB66679.2,CAD38544.1,CAI10903.1,CAI16505.1,CAI16506.2,CAM13064.1,CCDS81766,CCDS9400,CCDS9400.1,DKFZp434D1812,ENSG00000123200,ENSP00000242848,ENSP00000282007,ENSP00000305615,ENSP00000315883,ENSP00000334885,ENSP00000368200,ENSP00000368201,ENSP00000391064,ENSP00000416238,ENSP00000480658,ENST00000242848,ENST00000282007,E…
ZNF143	9606.ENSP00000379847	https://smart.embl.de/smart/DDvec.cgi?smart=638:ZnF_C2H2(237|261)+ZnF_C2H2(267|291)+ZnF_C2H2(297|321)+ZnF_C2H2(327|351)+ZnF_C2H2(357|381)+ZnF_C2H2(387|411)+ZnF_C2H2(417|440)+	Zinc finger protein 143; Transcriptional activator. Activates the gene for selenocysteine tRNA (tRNAsec). Binds to the SPH motif of small nuclear RNA (snRNA) gene promoters. Participates in efficient U6 RNA polymerase III transcription via its interaction with CHD8; Belongs to the GLI C2H2-type zinc-finger protein family	7702,A8K518,AAC50266.1,AAC96102.1,AAH20219.1,AC127030,AF071771,AK291133,AK297214,AK313330,B4DLY5,BAF83822.1,BAG59697.1,BC020219,C9J2G7,C9JCG1,C9JRS3,C9JTC5,CCDS60720,CCDS60720.1,CCDS60721,CCDS60721.1,CCDS7799,CCDS7799.2,E7EN86,E7ER34,E9PJF2,E9PLN4,E9PLS7,E9PMY8,E9PPB0,E9PS81,ENSG00000166478,ENSP00000299606,ENSP00000379843,ENSP00000379847,ENSP00000379849,ENSP00000388628,ENSP00000392323,ENSP0000039…

## Sheet: c
#node1	node2	node1_string_id	node2_string_id	neighborhood_on_chromosome	gene_fusion	phylogenetic_cooccurrence	homology	coexpression	experimentally_determined_interaction	database_annotated	automated_textmining	combined_score
ABI3	RPL11	9606.ENSP00000225941	9606.ENSP00000363676	0	0	0	0	0.428	0	0	0	0.428
AIMP1	PSMA4	9606.ENSP00000378191	9606.ENSP00000044462	0	0	0	0	0.725	0	0	0.049	0.727
AIMP1	PSMA3	9606.ENSP00000378191	9606.ENSP00000216455	0	0	0	0	0.722	0	0	0.047	0.723
AIMP1	EIF3G	9606.ENSP00000378191	9606.ENSP00000253108	0	0	0	0	0.508	0	0	0.067	0.522
AIMP1	PSMA6	9606.ENSP00000378191	9606.ENSP00000261479	0	0	0	0	0.72	0	0	0.086	0.733
AIMP1	PSMB1	9606.ENSP00000378191	9606.ENSP00000262193	0	0	0	0	0.538	0	0	0.059	0.546
AIMP1	VBP1	9606.ENSP00000378191	9606.ENSP00000286428	0	0	0	0	0.52	0	0	0	0.52
AIMP1	PSMD4	9606.ENSP00000378191	9606.ENSP00000357879	0	0	0	0	0.517	0	0	0	0.517
AIMP1	PSMA7	9606.ENSP00000378191	9606.ENSP00000359910	0	0	0	0	0.641	0.379	0	0.163	0.797
AIMP1	PSMB2	9606.ENSP00000378191	9606.ENSP00000362334	0	0	0	0	0.65	0	0	0	0.65
AIMP1	RPL11	9606.ENSP00000378191	9606.ENSP00000363676	0.073	0	0	0	0.299	0	0	0.216	0.446
AIMP1	PFDN6	9606.ENSP00000378191	9606.ENSP00000378563	0	0	0	0	0.51	0	0	0	0.51
AIMP1	UBE2V2	9606.ENSP00000378191	9606.ENSP00000428209	0	0	0	0	0.516	0	0	0.074	0.533
AIMP1	PSMA1	9606.ENSP00000378191	9606.ENSP00000414359	0	0	0	0	0.734	0	0	0.056	0.738
ANAPC10	PSMA4	9606.ENSP00000478501	9606.ENSP00000044462	0	0	0	0	0.198	0.05	0.9	0.153	0.926
ANAPC10	PSMA3	9606.ENSP00000478501	9606.ENSP00000216455	0	0	0	0	0.296	0	0.9	0.049	0.927
ANAPC10	NFKB1	9606.ENSP00000478501	9606.ENSP00000226574	0	0	0	0	0.119	0	0.9	0	0.908
ANAPC10	PSMA6	9606.ENSP00000478501	9606.ENSP00000261479	0	0	0	0	0.18	0	0.9	0.049	0.915
ANAPC10	PSMB1	9606.ENSP00000478501	9606.ENSP00000262193	0	0	0	0	0.171	0	0.9	0.049	0.914
ANAPC10	PSMD4	9606.ENSP00000478501	9606.ENSP00000357879	0	0	0	0	0.087	0	0.9	0.079	0.908
ANAPC10	PSMA7	9606.ENSP00000478501	9606.ENSP00000359910	0	0	0	0	0.101	0	0.9	0.049	0.907
ANAPC10	PSMB2	9606.ENSP00000478501	9606.ENSP00000362334	0	0	0	0	0.13	0	0.9	0.049	0.91
ANAPC10	PSMA1	9606.ENSP00000478501	9606.ENSP00000414359	0	0	0	0	0.229	0	0.9	0.174	0.93
ANAPC10	UBE2V2	9606.ENSP00000478501	9606.ENSP00000428209	0	0	0	0	0.184	0	0.9	0.134	0.923
ANAPC10	PSMD9	9606.ENSP00000478501	9606.ENSP00000440485	0	0	0	0	0.133	0	0.9	0	0.909
ANAPC10	TCEB1	9606.ENSP00000478501	9606.ENSP00000478121	0	0	0	0	0.195	0	0.9	0.049	0.916
ARHGEF6	NAA10	9606.ENSP00000250617	9606.ENSP00000417763	0	0	0	0	0.076	0.379	0	0.157	0.474
CCDC93	COMMD10	9606.ENSP00000365477	9606.ENSP00000274458	0	0	0	0	0.16	0.976	0	0.496	0.988
CCDC93	COMMD7	9606.ENSP00000365477	9606.ENSP00000278980	0	0	0	0	0.107	0.65	0	0	0.674
CCDC93	COMMD1	9606.ENSP00000365477	9606.ENSP00000308236	0	0	0	0	0.173	0.827	0	0.788	0.967
CCDC93	KIAA1033	9606.ENSP00000365477	9606.ENSP00000484713	0	0	0	0	0.088	0	0	0.532	0.555
CCDC93	COMMD5	9606.ENSP00000365477	9606.ENSP00000394331	0	0	0	0	0.094	0.65	0	0.68	0.889
CENPC	XPO1	9606.ENSP00000273853	9606.ENSP00000384863	0	0	0	0	0.11	0	0.9	0.054	0.908
CENPC	SEC13	9606.ENSP00000273853	9606.ENSP00000373312	0	0	0	0	0.111	0	0.9	0.079	0.91
CLEC16A	KCMF1	9606.ENSP00000387122	9606.ENSP00000386738	0	0	0	0	0.084	0	0	0.637	0.654
CNOT11	RQCD1	9606.ENSP00000289382	9606.ENSP00000273064	0	0	0	0	0.132	0.828	0.9	0.852	0.997
CNOT11	MIEN1	9606.ENSP00000289382	9606.ENSP00000377778	0	0	0	0	0.084	0	0	0.372	0.4
COMMD1	MKRN2	9606.ENSP00000308236	9606.ENSP00000170447	0	0	0	0	0.155	0	0	0.407	0.477
COMMD1	NFKB1	9606.ENSP00000308236	9606.ENSP00000226574	0	0	0	0	0.106	0.231	0	0.23	0.424
COMMD1	COMMD10	9606.ENSP00000308236	9606.ENSP00000274458	0	0	0	0	0.318	0.888	0.9	0.689	0.997
COMMD1	COMMD7	9606.ENSP00000308236	9606.ENSP00000278980	0	0	0	0	0.125	0.825	0.9	0.719	0.995
COMMD1	PPM1B	9606.ENSP00000308236	9606.ENSP00000282412	0	0	0	0	0.181	0	0	0.48	0.556
COMMD1	COPS6	9606.ENSP00000308236	9606.ENSP00000304102	0	0	0	0	0.163	0	0.9	0	0.912
COMMD1	TCEB1	9606.ENSP00000308236	9606.ENSP00000478121	0	0	0	0	0.183	0.348	0.9	0.225	0.953
COMMD1	COMMD5	9606.ENSP00000308236	9606.ENSP00000394331	0	0	0	0	0.111	0.942	0.9	0.526	0.997
COMMD10	GUK1	9606.ENSP00000274458	9606.ENSP00000355689	0	0	0	0	0.421	0	0	0	0.42
COMMD10	VTI1A	9606.ENSP00000274458	9606.ENSP00000376792	0	0	0	0	0.304	0	0	0.212	0.428
COMMD10	PPM1B	9606.ENSP00000274458	9606.ENSP00000282412	0	0	0	0	0.186	0	0	0.566	0.631
COMMD10	COPS6	9606.ENSP00000274458	9606.ENSP00000304102	0	0	0	0	0.198	0	0.9	0	0.916
COMMD10	TCEB1	9606.ENSP00000274458	9606.ENSP00000478121	0	0	0	0	0.247	0	0.9	0	0.921
COMMD10	COMMD7	9606.ENSP00000274458	9606.ENSP00000278980	0	0	0	0	0.199	0.945	0.9	0	0.995
COMMD10	COMMD5	9606.ENSP00000274458	9606.ENSP00000394331	0	0	0	0	0.189	0.888	0.9	0.59	0.995
COMMD5	COMMD7	9606.ENSP00000394331	9606.ENSP00000278980	0	0	0	0	0.247	0	0.9	0	0.921
COMMD5	COPS6	9606.ENSP00000394331	9606.ENSP00000304102	0	0	0	0	0.085	0	0.9	0	0.904
COMMD5	TCEB1	9606.ENSP00000394331	9606.ENSP00000478121	0	0	0	0	0.086	0	0.9	0.293	0.929
COMMD7	MED30	9606.ENSP00000278980	9606.ENSP00000297347	0	0	0	0	0.229	0	0	0.331	0.462
COMMD7	TCEB1	9606.ENSP00000278980	9606.ENSP00000478121	0	0	0	0	0.12	0	0.9	0	0.908
COMMD7	COPS6	9606.ENSP00000278980	9606.ENSP00000304102	0	0	0	0	0.127	0	0.9	0	0.909
COPS6	PSMA4	9606.ENSP00000304102	9606.ENSP00000044462	0	0	0	0	0.233	0.266	0	0.175	0.495
COPS6	PSMA3	9606.ENSP00000304102	9606.ENSP00000216455	0	0	0	0	0.215	0.266	0	0.078	0.422
COPS6	EIF3G	9606.ENSP00000304102	9606.ENSP00000253108	0	0	0	0	0.269	0.296	0	0.139	0.519
COPS6	PSMA6	9606.ENSP00000304102	9606.ENSP00000261479	0	0	0	0	0.214	0.266	0	0.078	0.422
COPS6	PSMB1	9606.ENSP00000304102	9606.ENSP00000262193	0	0	0	0	0.317	0.266	0	0.078	0.497
COPS6	PSMA1	9606.ENSP00000304102	9606.ENSP00000414359	0	0	0	0	0.277	0.266	0	0.078	0.468
COPS6	PSMB2	9606.ENSP00000304102	9606.ENSP00000362334	0	0	0	0	0.303	0.266	0	0.078	0.487
COPS6	PSMA7	9606.ENSP00000304102	9606.ENSP00000359910	0	0	0	0	0.28	0.266	0	0.327	0.613
COPS6	PSMD4	9606.ENSP00000304102	9606.ENSP00000357879	0	0	0	0	0.345	0.381	0	0.274	0.68
COPS6	TCEB1	9606.ENSP00000304102	9606.ENSP00000478121	0	0	0	0	0.161	0.166	0.9	0.095	0.928
EIF3G	PSMA4	9606.ENSP00000253108	9606.ENSP00000044462	0	0	0	0	0.627	0	0	0.051	0.631
EIF3G	MRPS10	9606.ENSP00000253108	9606.ENSP00000053468	0	0	0	0	0.276	0.715	0	0.253	0.832
EIF3G	PSMA3	9606.ENSP00000253108	9606.ENSP00000216455	0	0	0	0	0.645	0	0	0.085	0.662
EIF3G	NOP10	9606.ENSP00000253108	9606.ENSP00000332198	0	0	0	0	0.156	0	0	0.341	0.42
EIF3G	UBE2V2	9606.ENSP00000253108	9606.ENSP00000428209	0	0	0	0	0.442	0	0	0	0.442
EIF3G	PSMB2	9606.ENSP00000253108	9606.ENSP00000362334	0	0	0	0	0.438	0	0	0.051	0.444
EIF3G	PSMB1	9606.ENSP00000253108	9606.ENSP00000262193	0	0	0	0	0.463	0	0	0.051	0.469
EIF3G	PFDN1	9606.ENSP00000253108	9606.ENSP00000261813	0	0	0	0	0.504	0	0	0	0.504
EIF3G	PSMD4	9606.ENSP00000253108	9606.ENSP00000357879	0	0	0	0	0.508	0	0	0	0.508
EIF3G	VBP1	9606.ENSP00000253108	9606.ENSP00000286428	0	0	0	0	0.578	0	0	0	0.578
EIF3G	PSMA7	9606.ENSP00000253108	9606.ENSP00000359910	0	0	0	0	0.564	0	0	0.077	0.58
EIF3G	HNRNPK	9606.ENSP00000253108	9606.ENSP00000365439	0	0	0	0	0.547	0	0	0.122	0.585
EIF3G	PFDN6	9606.ENSP00000253108	9606.ENSP00000378563	0	0	0	0	0.585	0	0	0.081	0.602
EIF3G	PSMA6	9606.ENSP00000253108	9606.ENSP00000261479	0	0	0	0	0.629	0	0	0.051	0.632
EIF3G	NAA10	9606.ENSP00000253108	9606.ENSP00000417763	0	0	0	0	0.666	0	0	0	0.666
EIF3G	PSMA1	9606.ENSP00000253108	9606.ENSP00000414359	0	0	0	0	0.666	0	0	0.084	0.681
EIF3G	RPL37A	9606.ENSP00000253108	9606.ENSP00000418082	0	0	0	0	0.843	0	0.9	0.046	0.983
EIF3G	RPL11	9606.ENSP00000253108	9606.ENSP00000363676	0	0	0	0	0.888	0	0.9	0.111	0.989
ELP6	PSMA4	9606.ENSP00000296149	9606.ENSP00000044462	0	0	0	0	0.073	0.869	0	0	0.873
ELP6	PSMA3	9606.ENSP00000296149	9606.ENSP00000216455	0	0	0	0	0.072	0.866	0	0	0.87
ELP6	PSMA6	9606.ENSP00000296149	9606.ENSP00000261479	0	0	0	0	0.072	0.867	0	0	0.871
EMC7	PSMA6	9606.ENSP00000256545	9606.ENSP00000261479	0	0	0	0	0.437	0	0	0	0.437
EMC7	PSMA1	9606.ENSP00000256545	9606.ENSP00000414359	0	0	0	0	0.487	0	0	0	0.487
EMC7	PSMB1	9606.ENSP00000256545	9606.ENSP00000262193	0	0	0	0	0.492	0	0	0	0.492
EMC7	KRTCAP2	9606.ENSP00000256545	9606.ENSP00000295682	0	0	0	0	0.185	0	0	0.524	0.595
EMC7	PSMB2	9606.ENSP00000256545	9606.ENSP00000362334	0	0	0	0	0.434	0	0	0.603	0.765
FUBP3	SRSF7	9606.ENSP00000318177	9606.ENSP00000325905	0	0	0	0	0.303	0	0	0.226	0.437
GOSR2	VTI1A	9606.ENSP00000225567	9606.ENSP00000376792	0	0	0	0	0.289	0.162	0.54	0.801	0.938
GOSR2	SEC13	9606.ENSP00000225567	9606.ENSP00000373312	0	0	0	0	0.202	0	0.9	0.557	0.961
GTF2A1	SMARCC2	9606.ENSP00000452454	9606.ENSP00000267064	0	0	0	0	0.12	0	0.9	0.05	0.909
GTF2A1	ZNF143	9606.ENSP00000452454	9606.ENSP00000379847	0	0	0	0	0.085	0.107	0.9	0	0.911
GTF2A1	INTS12	9606.ENSP00000452454	9606.ENSP00000415433	0	0	0	0	0.17	0	0.9	0.042	0.913
GTF2A1	IRF3	9606.ENSP00000452454	9606.ENSP00000471896	0	0	0	0	0.074	0	0.9	0	0.903
GUK1	PSMB1	9606.ENSP00000355689	9606.ENSP00000262193	0	0	0	0	0.428	0	0	0	0.428
GUK1	PFDN6	9606.ENSP00000355689	9606.ENSP00000378563	0	0	0	0	0.338	0.123	0	0.058	0.405
GUK1	VTI1A	9606.ENSP00000355689	9606.ENSP00000376792	0	0	0	0	0.422	0	0	0	0.422
GUK1	PSMA1	9606.ENSP00000355689	9606.ENSP00000414359	0	0	0	0	0.428	0	0	0	0.428
HNRNPK	PSMA4	9606.ENSP00000365439	9606.ENSP00000044462	0	0	0	0	0.402	0	0	0	0.402
HNRNPK	PSMA3	9606.ENSP00000365439	9606.ENSP00000216455	0	0	0	0	0.457	0	0	0.074	0.475
HNRNPK	LSM7	9606.ENSP00000365439	9606.ENSP00000252622	0	0	0	0	0.171	0	0.9	0	0.913
HNRNPK	PFDN1	9606.ENSP00000365439	9606.ENSP00000261813	0	0	0	0	0.423	0	0	0	0.422
HNRNPK	TRA2A	9606.ENSP00000365439	9606.ENSP00000297071	0	0	0	0	0.307	0.167	0	0.227	0.515
HNRNPK	SRSF7	9606.ENSP00000365439	9606.ENSP00000325905	0	0	0	0	0.905	0.11	0.9	0.322	0.993
HNRNPK	PFDN6	9606.ENSP00000365439	9606.ENSP00000378563	0	0	0	0	0.464	0	0	0	0.463
HNRNPK	XPO1	9606.ENSP00000365439	9606.ENSP00000384863	0	0	0	0	0.305	0.14	0	0.355	0.581
HNRNPK	PSMA1	9606.ENSP00000365439	9606.ENSP00000414359	0	0	0	0	0.475	0	0	0.283	0.607
HNRNPK	NAA10	9606.ENSP00000365439	9606.ENSP00000417763	0	0	0	0	0.62	0	0	0	0.62
HNRNPK	LSM6	9606.ENSP00000365439	9606.ENSP00000422392	0	0	0	0	0.187	0.05	0.9	0.042	0.916
HNRNPK	LSM5	9606.ENSP00000365439	9606.ENSP00000410758	0	0	0	0	0.273	0.05	0.9	0.157	0.933
HSPA6	PSMA4	9606.ENSP00000310219	9606.ENSP00000044462	0	0	0	0	0.383	0.163	0	0.057	0.47
HSPA6	PSMA3	9606.ENSP00000310219	9606.ENSP00000216455	0	0	0	0	0.428	0.08	0	0.067	0.466
HSPA6	NFKB1	9606.ENSP00000310219	9606.ENSP00000226574	0	0	0	0	0.183	0.243	0	0.136	0.419
HSPA6	PSMA6	9606.ENSP00000310219	9606.ENSP00000261479	0	0	0	0	0.422	0.08	0	0.079	0.467
HSPA6	PSMD4	9606.ENSP00000310219	9606.ENSP00000357879	0	0	0	0	0.337	0.141	0	0.061	0.419
HSPA6	PSMA1	9606.ENSP00000310219	9606.ENSP00000414359	0	0	0	0	0.428	0.08	0	0.086	0.477
HSPA6	PSMA7	9606.ENSP00000310219	9606.ENSP00000359910	0	0	0	0	0.466	0.08	0	0.181	0.562
INTS12	ZNF143	9606.ENSP00000415433	9606.ENSP00000379847	0	0	0	0	0.169	0	0.9	0.067	0.915
IRF3	NFKB1	9606.ENSP00000471896	9606.ENSP00000226574	0	0	0	0	0.119	0	0	0.44	0.485
IRF3	SMARCC2	9606.ENSP00000471896	9606.ENSP00000267064	0	0	0	0	0.157	0	0.9	0	0.912
KCMF1	MKRN2	9606.ENSP00000386738	9606.ENSP00000170447	0	0	0	0	0.089	0	0	0.445	0.473
KCMF1	TUBA1C	9606.ENSP00000386738	9606.ENSP00000301072	0	0	0	0	0.12	0.377	0	0	0.428
KCMF1	PSMD9	9606.ENSP00000386738	9606.ENSP00000440485	0	0	0	0	0.081	0	0	0.461	0.483
KIAA1033	SNX6	9606.ENSP00000484713	9606.ENSP00000355217	0	0	0	0	0.115	0	0	0.449	0.491
KIAA2013	NOP10	9606.ENSP00000365756	9606.ENSP00000332198	0	0	0	0	0.179	0	0	0.32	0.418
KIAA2013	VMA21	9606.ENSP00000365756	9606.ENSP00000333255	0	0	0	0	0.184	0.826	0	0	0.851
KRTCAP2	SEC61G	9606.ENSP00000295682	9606.ENSP00000388337	0	0	0	0	0.479	0	0	0	0.479
LSM12	LSM7	9606.ENSP00000466718	9606.ENSP00000252622	0	0	0	0	0.1	0	0	0.74	0.756
LSM12	LSM5	9606.ENSP00000466718	9606.ENSP00000410758	0	0	0	0	0.242	0.263	0	0.479	0.683
LSM12	LSM6	9606.ENSP00000466718	9606.ENSP00000422392	0	0	0	0	0.2	0.263	0	0.74	0.833
LSM5	PSMA3	9606.ENSP00000410758	9606.ENSP00000216455	0	0	0	0	0.361	0	0	0.108	0.406
LSM5	LSM7	9606.ENSP00000410758	9606.ENSP00000252622	0	0	0	0	0.716	0.996	0.9	0.956	0.999
LSM5	PFDN1	9606.ENSP00000410758	9606.ENSP00000261813	0	0	0	0	0.41	0	0	0	0.41
LSM5	SRSF7	9606.ENSP00000410758	9606.ENSP00000325905	0	0	0	0	0.286	0	0.9	0	0.925
LSM5	LSM6	9606.ENSP00000410758	9606.ENSP00000422392	0	0	0	0	0.503	0.998	0.9	0.96	0.999
LSM6	PSMA4	9606.ENSP00000422392	9606.ENSP00000044462	0	0	0	0	0.251	0	0	0.351	0.493
LSM6	PSMA3	9606.ENSP00000422392	9606.ENSP00000216455	0	0	0	0	0.261	0	0	0.304	0.464
LSM6	LSM7	9606.ENSP00000422392	9606.ENSP00000252622	0	0	0	0	0.573	0.998	0.9	0.956	0.999
LSM6	SRSF7	9606.ENSP00000422392	9606.ENSP00000325905	0	0	0	0	0.233	0	0.9	0.047	0.92
LSM6	NOP10	9606.ENSP00000422392	9606.ENSP00000332198	0	0	0	0	0.218	0	0.54	0.085	0.642
LSM6	NSMCE1	9606.ENSP00000422392	9606.ENSP00000355077	0	0	0	0	0.18	0	0	0.448	0.528
LSM6	PSMB2	9606.ENSP00000422392	9606.ENSP00000362334	0	0	0	0	0.276	0	0	0.297	0.47
LSM6	PFDN6	9606.ENSP00000422392	9606.ENSP00000378563	0	0	0	0	0.251	0	0	0.261	0.423
LSM6	SEC61G	9606.ENSP00000422392	9606.ENSP00000388337	0	0	0	0	0.857	0	0	0.058	0.859
LSM7	PSMA4	9606.ENSP00000252622	9606.ENSP00000044462	0	0	0	0	0.188	0	0	0.303	0.41
LSM7	PFDN6	9606.ENSP00000252622	9606.ENSP00000378563	0	0	0	0	0.392	0	0	0.08	0.417
LSM7	PSMB2	9606.ENSP00000252622	9606.ENSP00000362334	0	0	0	0	0.249	0	0	0.283	0.439
LSM7	NSMCE1	9606.ENSP00000252622	9606.ENSP00000355077	0	0	0	0	0.166	0	0	0.374	0.456
LSM7	SRSF7	9606.ENSP00000252622	9606.ENSP00000325905	0	0	0	0	0.12	0	0.9	0.183	0.921
MED11	MED30	9606.ENSP00000293777	9606.ENSP00000297347	0	0	0	0	0.184	0.853	0.9	0.833	0.997
MED30	ZC3H13	9606.ENSP00000297347	9606.ENSP00000282007	0	0	0	0	0.27	0.993	0	0	0.994
MED30	RPL11	9606.ENSP00000297347	9606.ENSP00000363676	0	0	0	0	0.507	0	0	0.062	0.517
MIEN1	SEC61G	9606.ENSP00000377778	9606.ENSP00000388337	0	0	0	0	0.172	0	0	0.398	0.48
MRPL34	MRPS10	9606.ENSP00000252602	9606.ENSP00000053468	0	0	0	0	0.163	0.92	0.9	0	0.992
MRPL34	RPL11	9606.ENSP00000252602	9606.ENSP00000363676	0	0	0	0	0.132	0.341	0	0	0.403
MRPL34	MRPS24	9606.ENSP00000252602	9606.ENSP00000318158	0	0	0	0	0.197	0.8	0.9	0.162	0.984
MRPS10	NDUFAF3	9606.ENSP00000053468	9606.ENSP00000323076	0	0	0	0	0.216	0	0	0.31	0.436
MRPS10	TRA2A	9606.ENSP00000053468	9606.ENSP00000297071	0	0	0	0	0.124	0.484	0	0.058	0.537
MRPS10	VBP1	9606.ENSP00000053468	9606.ENSP00000286428	0	0	0	0	0.137	0	0	0.546	0.591
MRPS10	SEC61G	9606.ENSP00000053468	9606.ENSP00000388337	0	0	0	0	0.48	0.715	0	0	0.845
MRPS10	RPL37A	9606.ENSP00000053468	9606.ENSP00000418082	0	0	0	0	0.681	0.713	0	0.308	0.931
MRPS10	RPL11	9606.ENSP00000053468	9606.ENSP00000363676	0.219	0	0	0	0.659	0.93	0	0.308	0.985
MRPS10	MRPS24	9606.ENSP00000053468	9606.ENSP00000318158	0	0	0	0	0.541	0.852	0.9	0.128	0.993
MRPS24	SEC61G	9606.ENSP00000318158	9606.ENSP00000388337	0	0	0	0	0.473	0	0	0	0.473
NAA10	PSMA4	9606.ENSP00000417763	9606.ENSP00000044462	0	0	0	0	0.516	0.085	0	0.051	0.543
NAA10	PSMA3	9606.ENSP00000417763	9606.ENSP00000216455	0	0	0	0	0.621	0.085	0	0.044	0.639
NAA10	PSMA6	9606.ENSP00000417763	9606.ENSP00000261479	0	0	0	0	0.504	0.085	0	0.044	0.528
NAA10	PFDN1	9606.ENSP00000417763	9606.ENSP00000261813	0	0	0	0	0.517	0	0	0	0.517
NAA10	PPM1B	9606.ENSP00000417763	9606.ENSP00000282412	0	0	0	0	0.125	0.403	0	0	0.455
NAA10	VBP1	9606.ENSP00000417763	9606.ENSP00000286428	0	0	0	0	0.642	0.05	0	0.057	0.651
NAA10	NAA20	9606.ENSP00000417763	9606.ENSP00000335636	0	0	0	0.766	0.222	0	0.54	0.85	0.7
NAA10	PSMA7	9606.ENSP00000417763	9606.ENSP00000359910	0	0	0	0	0.528	0.085	0	0.044	0.551
NAA10	PFDN6	9606.ENSP00000417763	9606.ENSP00000378563	0	0	0	0	0.538	0	0	0.055	0.545
NAA10	PSMA1	9606.ENSP00000417763	9606.ENSP00000414359	0	0	0	0	0.61	0.085	0	0.044	0.629
NAA10	UBE2V2	9606.ENSP00000417763	9606.ENSP00000428209	0	0	0	0	0.441	0	0	0	0.441
NEDD1	TUBB	9606.ENSP00000451211	9606.ENSP00000339001	0	0	0	0	0	0.122	0.9	0.129	0.916
NEDD1	SCAF11	9606.ENSP00000451211	9606.ENSP00000358374	0	0	0	0	0.087	0.524	0	0.173	0.609
NEDD1	NUMA1	9606.ENSP00000451211	9606.ENSP00000377298	0	0	0	0	0.074	0	0.9	0.47	0.946
NFKB1	PSMA4	9606.ENSP00000226574	9606.ENSP00000044462	0	0	0	0	0.272	0.441	0.9	0.12	0.959
NFKB1	PSMA3	9606.ENSP00000226574	9606.ENSP00000216455	0	0	0	0	0.249	0.138	0.9	0	0.929
NFKB1	PSMD9	9606.ENSP00000226574	9606.ENSP00000440485	0	0	0	0	0.133	0.059	0.9	0.054	0.912
NFKB1	XPO1	9606.ENSP00000226574	9606.ENSP00000384863	0	0	0	0	0.133	0.07	0.9	0.22	0.928
NFKB1	PSMB2	9606.ENSP00000226574	9606.ENSP00000362334	0	0	0	0	0.248	0.138	0.9	0.07	0.931
NFKB1	PSMA7	9606.ENSP00000226574	9606.ENSP00000359910	0	0	0	0	0.244	0.138	0.9	0.074	0.931
NFKB1	PSMA6	9606.ENSP00000226574	9606.ENSP00000261479	0	0	0	0	0.27	0.138	0.9	0.058	0.932
NFKB1	PSMA1	9606.ENSP00000226574	9606.ENSP00000414359	0	0	0	0	0.285	0.138	0.9	0.056	0.934
NFKB1	PSMB1	9606.ENSP00000226574	9606.ENSP00000262193	0	0	0	0	0.27	0.138	0.9	0.115	0.936
NFKB1	PSMD4	9606.ENSP00000226574	9606.ENSP00000357879	0	0	0	0	0.203	0.262	0.9	0.112	0.94
NIF3L1	XPO1	9606.ENSP00000386394	9606.ENSP00000384863	0	0	0	0	0.161	0	0	0.402	0.476
NOP10	RPL11	9606.ENSP00000332198	9606.ENSP00000363676	0	0	0	0	0.254	0	0	0.299	0.455
NOP10	SEC61G	9606.ENSP00000332198	9606.ENSP00000388337	0	0	0	0	0.639	0	0	0	0.639
NSMCE1	PSMA4	9606.ENSP00000355077	9606.ENSP00000044462	0	0	0	0	0.144	0	0	0.472	0.529
NSMCE1	PSMA3	9606.ENSP00000355077	9606.ENSP00000216455	0	0	0	0	0.122	0	0	0.455	0.501
NSMCE1	PSMB2	9606.ENSP00000355077	9606.ENSP00000362334	0	0	0	0	0.181	0	0	0.455	0.534
NUMA1	NUTF2	9606.ENSP00000377298	9606.ENSP00000219169	0	0	0	0	0.123	0	0	0.353	0.408
NUMA1	PFDN1	9606.ENSP00000377298	9606.ENSP00000261813	0	0	0	0	0.155	0	0	0.361	0.437
NUMA1	SMARCC2	9606.ENSP00000377298	9606.ENSP00000267064	0	0	0	0	0.417	0	0	0	0.417
NUMA1	TUBB	9606.ENSP00000377298	9606.ENSP00000339001	0	0	0	0	0.059	0	0.9	0.056	0.903
NUTF2	PSMA4	9606.ENSP00000219169	9606.ENSP00000044462	0	0	0	0	0.329	0	0	0.2	0.44
NUTF2	PSMB1	9606.ENSP00000219169	9606.ENSP00000262193	0	0	0	0	0.403	0	0	0.062	0.416
NUTF2	PSMA7	9606.ENSP00000219169	9606.ENSP00000359910	0	0	0	0	0.334	0	0	0.173	0.425
NUTF2	PSMB2	9606.ENSP00000219169	9606.ENSP00000362334	0	0	0	0	0.437	0	0	0.062	0.449
NUTF2	VBP1	9606.ENSP00000219169	9606.ENSP00000286428	0	0	0	0	0.335	0	0	0.228	0.465
NUTF2	PSMA1	9606.ENSP00000219169	9606.ENSP00000414359	0	0	0	0	0.452	0	0	0.106	0.489
NUTF2	SEC13	9606.ENSP00000219169	9606.ENSP00000373312	0	0	0	0	0.275	0	0	0.533	0.647
NUTF2	XPO1	9606.ENSP00000219169	9606.ENSP00000384863	0	0	0	0	0.13	0.05	0	0.811	0.83
PFDN1	PSMA4	9606.ENSP00000261813	9606.ENSP00000044462	0	0	0	0	0.626	0	0	0	0.626
PFDN1	PSMA3	9606.ENSP00000261813	9606.ENSP00000216455	0	0	0	0	0.629	0	0	0	0.629
PFDN1	PSMA6	9606.ENSP00000261813	9606.ENSP00000261479	0	0	0	0	0.641	0	0	0	0.641
PFDN1	PSMD4	9606.ENSP00000261813	9606.ENSP00000357879	0	0	0	0	0.428	0	0	0	0.428
PFDN1	SCAF11	9606.ENSP00000261813	9606.ENSP00000358374	0	0	0	0	0.181	0	0	0.334	0.431
PFDN1	PSMB2	9606.ENSP00000261813	9606.ENSP00000362334	0	0	0	0	0.548	0	0	0	0.548
PFDN1	PSMB1	9606.ENSP00000261813	9606.ENSP00000262193	0	0	0	0	0.567	0	0	0	0.567
PFDN1	UBE2V2	9606.ENSP00000261813	9606.ENSP00000428209	0	0	0	0	0.571	0	0	0	0.571
PFDN1	PSMA7	9606.ENSP00000261813	9606.ENSP00000359910	0	0	0	0	0.626	0	0	0	0.626
PFDN1	PSMA1	9606.ENSP00000261813	9606.ENSP00000414359	0	0	0	0	0.712	0	0	0	0.712
PFDN1	TUBA1C	9606.ENSP00000261813	9606.ENSP00000301072	0	0	0	0	0.184	0	0.9	0	0.914
PFDN1	VBP1	9606.ENSP00000261813	9606.ENSP00000286428	0	0	0	0	0.651	0.933	0.9	0.908	0.999
PFDN1	PFDN6	9606.ENSP00000261813	9606.ENSP00000378563	0	0	0	0	0.767	0.974	0.9	0.827	0.999
PFDN6	PSMA4	9606.ENSP00000378563	9606.ENSP00000044462	0.069	0	0	0	0.707	0.064	0	0.091	0.737
PFDN6	PSMA3	9606.ENSP00000378563	9606.ENSP00000216455	0.069	0	0	0	0.74	0.064	0	0.056	0.757
PFDN6	PSMA6	9606.ENSP00000378563	9606.ENSP00000261479	0.069	0	0	0	0.73	0.064	0	0.056	0.748
PFDN6	PSMB1	9606.ENSP00000378563	9606.ENSP00000262193	0.069	0	0	0	0.635	0.064	0	0.056	0.659
PFDN6	PIH1D1	9606.ENSP00000378563	9606.ENSP00000262265	0	0	0	0	0.204	0	0	0.625	0.688
PFDN6	VBP1	9606.ENSP00000378563	9606.ENSP00000286428	0	0	0	0	0.847	0.962	0.9	0.832	0.999
PFDN6	TUBA1C	9606.ENSP00000378563	9606.ENSP00000301072	0	0	0	0	0.189	0.124	0.9	0.28	0.942
PFDN6	PPP1CA	9606.ENSP00000378563	9606.ENSP00000326031	0	0	0	0	0.273	0.247	0	0.113	0.473
PFDN6	PSMD4	9606.ENSP00000378563	9606.ENSP00000357879	0	0	0	0	0.628	0.071	0	0	0.639
PFDN6	PSMA7	9606.ENSP00000378563	9606.ENSP00000359910	0.069	0	0	0	0.634	0.064	0	0.055	0.658
PFDN6	PSMB2	9606.ENSP00000378563	9606.ENSP00000362334	0.069	0	0	0	0.627	0.064	0	0.062	0.654
PFDN6	XPO1	9606.ENSP00000378563	9606.ENSP00000384863	0	0	0	0	0.318	0	0	0.156	0.4
PFDN6	RPL37A	9606.ENSP00000378563	9606.ENSP00000418082	0.219	0	0	0	0.262	0	0	0.064	0.414
PFDN6	UBE2V2	9606.ENSP00000378563	9606.ENSP00000428209	0	0	0	0	0.623	0	0	0	0.623
PFDN6	PSMA1	9606.ENSP00000378563	9606.ENSP00000414359	0.069	0	0	0	0.771	0.064	0	0.056	0.786
PIH1D1	PPP1CA	9606.ENSP00000262265	9606.ENSP00000326031	0	0	0	0	0.213	0.564	0	0.117	0.671
PPP1CA	SRSF7	9606.ENSP00000326031	9606.ENSP00000325905	0	0	0	0	0.173	0.392	0	0	0.476
PPP1CA	PSMB2	9606.ENSP00000326031	9606.ENSP00000362334	0	0	0	0	0.333	0.092	0	0.095	0.404
PPP1CA	PSMA7	9606.ENSP00000326031	9606.ENSP00000359910	0	0	0	0	0.359	0.092	0	0.062	0.406
PSMA1	PSMA4	9606.ENSP00000414359	9606.ENSP00000044462	0	0	0.267	0.75	0.991	0.994	0.9	0.88	0.999
PSMA1	PSMA3	9606.ENSP00000414359	9606.ENSP00000216455	0	0	0.358	0.733	0.994	0.994	0.9	0.889	0.999
PSMA1	PSMA6	9606.ENSP00000414359	9606.ENSP00000261479	0	0	0.327	0.757	0.992	0.994	0.9	0.817	0.999
PSMA1	PSMB1	9606.ENSP00000414359	9606.ENSP00000262193	0	0	0	0	0.988	0.994	0.9	0.911	0.999
PSMA1	VBP1	9606.ENSP00000414359	9606.ENSP00000286428	0	0	0	0	0.763	0.057	0	0	0.767
PSMA1	PSMD4	9606.ENSP00000414359	9606.ENSP00000357879	0	0	0	0	0.946	0.992	0.9	0.44	0.999
PSMA1	PSMA7	9606.ENSP00000414359	9606.ENSP00000359910	0	0	0.385	0.832	0.982	0.992	0.9	0.696	0.999
PSMA1	PSMB2	9606.ENSP00000414359	9606.ENSP00000362334	0	0	0	0	0.99	0.991	0.9	0.781	0.999
PSMA1	SEC13	9606.ENSP00000414359	9606.ENSP00000373312	0	0	0	0	0.385	0	0	0.071	0.404
PSMA1	SEC61G	9606.ENSP00000414359	9606.ENSP00000388337	0	0	0	0	0.408	0.055	0	0.057	0.426
PSMA1	UBE2V2	9606.ENSP00000414359	9606.ENSP00000428209	0	0	0	0	0.735	0	0	0.058	0.74
PSMA1	TCEB1	9606.ENSP00000414359	9606.ENSP00000478121	0	0	0	0	0.443	0	0.9	0	0.941
PSMA1	PSMD9	9606.ENSP00000414359	9606.ENSP00000440485	0	0	0	0	0.291	0.061	0.9	0.278	0.945
PSMA3	PSMA4	9606.ENSP00000216455	9606.ENSP00000044462	0	0	0.327	0.751	0.996	0.994	0.9	0.889	0.999
PSMA3	SEC61G	9606.ENSP00000216455	9606.ENSP00000388337	0	0	0	0	0.393	0.055	0	0.057	0.412
PSMA3	RPL11	9606.ENSP00000216455	9606.ENSP00000363676	0	0	0	0	0.544	0	0	0.458	0.742
PSMA3	VBP1	9606.ENSP00000216455	9606.ENSP00000286428	0	0	0	0	0.746	0.084	0	0	0.757
PSMA3	UBE2V2	9606.ENSP00000216455	9606.ENSP00000428209	0	0	0	0	0.759	0	0	0.236	0.808
PSMA3	TCEB1	9606.ENSP00000216455	9606.ENSP00000478121	0	0	0	0	0.698	0	0.9	0	0.968
PSMA3	PSMD9	9606.ENSP00000216455	9606.ENSP00000440485	0	0	0	0	0.196	0.061	0.9	0.737	0.977
PSMA3	PSMD4	9606.ENSP00000216455	9606.ENSP00000357879	0	0	0	0	0.927	0.991	0.9	0.606	0.999
PSMA3	PSMA6	9606.ENSP00000216455	9606.ENSP00000261479	0	0	0.383	0.79	0.995	0.994	0.9	0.837	0.999
PSMA3	PSMB1	9606.ENSP00000216455	9606.ENSP00000262193	0	0	0.322	0	0.958	0.993	0.9	0.806	0.999
PSMA3	PSMB2	9606.ENSP00000216455	9606.ENSP00000362334	0	0	0	0	0.956	0.994	0.9	0.792	0.999
PSMA3	PSMA7	9606.ENSP00000216455	9606.ENSP00000359910	0	0	0.435	0.801	0.976	0.992	0.9	0.794	0.999
PSMA4	RPL11	9606.ENSP00000044462	9606.ENSP00000363676	0	0	0	0	0.347	0	0	0.219	0.468
PSMA4	VBP1	9606.ENSP00000044462	9606.ENSP00000286428	0	0	0	0	0.709	0.057	0	0.059	0.719
PSMA4	UBE2V2	9606.ENSP00000044462	9606.ENSP00000428209	0	0	0	0	0.69	0	0	0.168	0.732
PSMA4	TCEB1	9606.ENSP00000044462	9606.ENSP00000478121	0	0	0	0	0.523	0	0.9	0.091	0.952
PSMA4	PSMD9	9606.ENSP00000044462	9606.ENSP00000440485	0	0	0	0	0.215	0.061	0.9	0.571	0.964
PSMA4	PSMD4	9606.ENSP00000044462	9606.ENSP00000357879	0	0	0	0	0.924	0.991	0.9	0.677	0.999
PSMA4	PSMA6	9606.ENSP00000044462	9606.ENSP00000261479	0	0	0.347	0.82	0.996	0.992	0.9	0.815	0.999
PSMA4	PSMB1	9606.ENSP00000044462	9606.ENSP00000262193	0	0	0.216	0	0.976	0.993	0.9	0.722	0.999
PSMA4	PSMB2	9606.ENSP00000044462	9606.ENSP00000362334	0	0	0	0	0.974	0.994	0.9	0.701	0.999
PSMA4	PSMA7	9606.ENSP00000044462	9606.ENSP00000359910	0	0	0.361	0.866	0.981	0.992	0.9	0.75	0.999
PSMA6	RPL11	9606.ENSP00000261479	9606.ENSP00000363676	0	0	0	0	0.401	0	0	0.081	0.426
PSMA6	UBE2V2	9606.ENSP00000261479	9606.ENSP00000428209	0	0	0	0	0.668	0	0	0.247	0.74
PSMA6	VBP1	9606.ENSP00000261479	9606.ENSP00000286428	0	0	0	0	0.749	0.057	0	0	0.754
PSMA6	TCEB1	9606.ENSP00000261479	9606.ENSP00000478121	0	0	0	0	0.509	0	0.9	0	0.948
PSMA6	PSMD9	9606.ENSP00000261479	9606.ENSP00000440485	0	0	0	0	0.264	0.061	0.9	0.636	0.971
PSMA6	PSMD4	9606.ENSP00000261479	9606.ENSP00000357879	0	0	0	0	0.835	0.992	0.9	0.491	0.999
PSMA6	PSMB1	9606.ENSP00000261479	9606.ENSP00000262193	0	0	0.228	0	0.964	0.994	0.9	0.721	0.999
PSMA6	PSMB2	9606.ENSP00000261479	9606.ENSP00000362334	0	0	0.219	0	0.979	0.993	0.9	0.707	0.999
PSMA6	PSMA7	9606.ENSP00000261479	9606.ENSP00000359910	0	0	0.419	0.818	0.966	0.992	0.9	0.675	0.999
PSMA7	PSMB1	9606.ENSP00000359910	9606.ENSP00000262193	0	0	0.302	0	0.936	0.991	0.9	0.661	0.999
PSMA7	VBP1	9606.ENSP00000359910	9606.ENSP00000286428	0	0	0	0	0.648	0.057	0	0.048	0.657
PSMA7	PSMD4	9606.ENSP00000359910	9606.ENSP00000357879	0	0	0	0	0.791	0.992	0.9	0.468	0.999
PSMA7	RPL37A	9606.ENSP00000359910	9606.ENSP00000418082	0.077	0	0	0	0.413	0	0	0	0.435
PSMA7	RPL11	9606.ENSP00000359910	9606.ENSP00000363676	0	0	0	0	0.444	0	0	0.121	0.49
PSMA7	UBE2V2	9606.ENSP00000359910	9606.ENSP00000428209	0	0	0	0	0.636	0	0	0.058	0.643
PSMA7	TCEB1	9606.ENSP00000359910	9606.ENSP00000478121	0	0	0	0	0.32	0	0.9	0.059	0.93
PSMA7	PSMD9	9606.ENSP00000359910	9606.ENSP00000440485	0	0	0	0	0.219	0.061	0.9	0.28	0.94
PSMA7	PSMB2	9606.ENSP00000359910	9606.ENSP00000362334	0	0	0.212	0	0.952	0.991	0.9	0.602	0.999
PSMB1	SEC13	9606.ENSP00000262193	9606.ENSP00000373312	0	0	0	0	0.371	0.14	0	0.071	0.454
PSMB1	SEC61G	9606.ENSP00000262193	9606.ENSP00000388337	0	0	0	0	0.394	0.055	0	0.223	0.516
PSMB1	PTRHD1	9606.ENSP00000262193	9606.ENSP00000330389	0	0	0	0	0.242	0	0	0.429	0.548
PSMB1	VBP1	9606.ENSP00000262193	9606.ENSP00000286428	0	0	0	0	0.572	0.057	0	0	0.579
PSMB1	UBE2V2	9606.ENSP00000262193	9606.ENSP00000428209	0	0	0	0	0.535	0	0	0.256	0.64
PSMB1	TCEB1	9606.ENSP00000262193	9606.ENSP00000478121	0	0	0	0	0.363	0	0.9	0.082	0.936
PSMB1	PSMD9	9606.ENSP00000262193	9606.ENSP00000440485	0	0	0	0	0.248	0.129	0.9	0.592	0.969
PSMB1	PSMD4	9606.ENSP00000262193	9606.ENSP00000357879	0	0	0	0	0.843	0.991	0.9	0.441	0.999
PSMB1	PSMB2	9606.ENSP00000262193	9606.ENSP00000362334	0	0	0	0.68	0.978	0.993	0.9	0.902	0.999
PSMB2	VBP1	9606.ENSP00000362334	9606.ENSP00000286428	0	0	0	0	0.645	0.057	0	0	0.651
PSMB2	PSMD4	9606.ENSP00000362334	9606.ENSP00000357879	0	0	0	0	0.664	0.991	0.9	0.62	0.999
PSMB2	UBE2V2	9606.ENSP00000362334	9606.ENSP00000428209	0	0	0	0	0.564	0	0	0.058	0.571
PSMB2	TCEB1	9606.ENSP00000362334	9606.ENSP00000478121	0	0	0	0	0.336	0	0.9	0	0.93
PSMB2	PSMD9	9606.ENSP00000362334	9606.ENSP00000440485	0	0	0	0	0.276	0.061	0.9	0.576	0.967
PSMD4	VBP1	9606.ENSP00000357879	9606.ENSP00000286428	0	0	0	0	0.643	0.126	0	0.052	0.679
PSMD4	UBE2V2	9606.ENSP00000357879	9606.ENSP00000428209	0	0	0	0	0.515	0	0	0.161	0.576
PSMD4	TCEB1	9606.ENSP00000357879	9606.ENSP00000478121	0	0	0	0	0.312	0.231	0.9	0.066	0.944
PSMD4	PSMD9	9606.ENSP00000357879	9606.ENSP00000440485	0	0	0	0	0.166	0.808	0.9	0.674	0.994
PSMD9	UPF2	9606.ENSP00000440485	9606.ENSP00000348708	0	0	0	0	0.177	0.342	0	0.138	0.492
PSMD9	TCEB1	9606.ENSP00000440485	9606.ENSP00000478121	0	0	0	0	0.13	0	0.9	0	0.909
RPL11	UPF2	9606.ENSP00000363676	9606.ENSP00000348708	0	0	0	0	0.115	0	0.9	0	0.907
RPL11	UBE2V2	9606.ENSP00000363676	9606.ENSP00000428209	0	0	0	0	0.231	0	0	0.263	0.409
RPL11	XPO1	9606.ENSP00000363676	9606.ENSP00000384863	0	0	0	0	0.288	0	0	0.367	0.531
RPL11	SEC61G	9606.ENSP00000363676	9606.ENSP00000388337	0	0	0	0	0.381	0.96	0.9	0	0.997
RPL11	RPL37A	9606.ENSP00000363676	9606.ENSP00000418082	0	0	0	0	0.974	0.991	0.9	0.626	0.999
RPL37A	UPF2	9606.ENSP00000418082	9606.ENSP00000348708	0	0	0	0	0.183	0	0.9	0	0.914
RPL37A	SEC61G	9606.ENSP00000418082	9606.ENSP00000388337	0	0	0	0	0.619	0.96	0.9	0	0.998
SCAF11	SRSF7	9606.ENSP00000358374	9606.ENSP00000325905	0	0	0	0	0.192	0	0	0.303	0.413
SEC13	VTI1A	9606.ENSP00000373312	9606.ENSP00000376792	0	0	0	0	0.235	0.06	0	0.25	0.414
SEC13	XPO1	9606.ENSP00000373312	9606.ENSP00000384863	0	0	0	0	0.229	0.041	0.9	0.219	0.934
SEC61G	TCEB1	9606.ENSP00000388337	9606.ENSP00000478121	0	0	0	0	0.443	0	0	0	0.443
SRSF7	TRA2A	9606.ENSP00000325905	9606.ENSP00000297071	0	0	0	0	0.351	0.626	0	0.526	0.875
SRSF7	XPO1	9606.ENSP00000325905	9606.ENSP00000384863	0	0	0	0	0.337	0.041	0	0.214	0.457
TCEB1	VBP1	9606.ENSP00000478121	9606.ENSP00000286428	0	0	0	0	0.727	0	0	0.361	0.818
TCEB1	UBE2V2	9606.ENSP00000478121	9606.ENSP00000428209	0	0	0	0	0.492	0	0.9	0.134	0.952
TUBA1C	VBP1	9606.ENSP00000301072	9606.ENSP00000286428	0	0	0	0	0.177	0.188	0.9	0.303	0.947
TUBA1C	TUBB	9606.ENSP00000301072	9606.ENSP00000339001	0	0	0	0.921	0.39	0.832	0.8	0.462	0.978
TUBB	XPO1	9606.ENSP00000339001	9606.ENSP00000384863	0	0.045	0	0	0.133	0.387	0	0.059	0.458
UBE2V2	VBP1	9606.ENSP00000428209	9606.ENSP00000286428	0	0	0	0	0.627	0	0	0	0.627
UPF2	XPO1	9606.ENSP00000348708	9606.ENSP00000384863	0	0	0	0	0.138	0.051	0	0.467	0.527
VTI1A	ZBTB8OS	9606.ENSP00000376792	9606.ENSP00000417677	0	0	0	0	0.428	0	0	0	0.428
