# Supplementary material for: Comparative Genomic Analysis of the DUF34 Protein Family Suggests Role as a Metal Ion Chaperone or Insertase
Source: Preprints.org preprint supplement (doi:10.20944/preprints202107.0280.v1), 2021-07-13
Supplement: Supplementary file 5 [file Data Table 2.xlsx]

## Sheet: Contents
Data Table 2		Reed et al., 2021
a	Complete list of focal and non-focal publications collected in result of comprehensive data capture and literature review process; publications curated prior to September 2020
b	Addendum to table S4; additional unique publications curated on January 18, 2021
	Important*:	The organisms and/or sequences added with the addendum to this data table were not included in any analyses completed before this date (January 18, 2021); this applies to all figures, supplemental or in-text, as well as all data tables, supplemental and in-text tables.

## Sheet: a
Focal/Non-focal	Superkingdom	System_specific	Full Reference
nonfocal	Virus	Acanthoemeba polyphaga mimivirus	D. Moreira and C. Brochier-Armanet, “Giant viruses, giant chimeras: The multiple evolutionary histories of Mimivirus genes,” BMC Evol. Biol., vol. 8, no. 1, p. 12, 2008.
nonfocal	Bacteria	Acinetobacter baumannii	T. B. Tran, “Anthelmintic closantel enhances bacterial killing of polymyxin B against multidrug-resistant Acinetobacter baumannii,” Monash University, 2018.
nonfocal	Eukaryota	Alligator mississippiensis	S. L. Alderman, D. A. Crossley, R. M. Elsey, and T. E. Gillis, “Hypoxia-induced reprogramming of the cardiac phenotype in American alligators (Alligator mississippiensis) revealed by quantitative proteomics,” Sci. Rep., vol. 9, no. 1, p. 8592, Dec. 2019.
nonfocal	Eukaryota	Aspergillus fumigatus	K. A. O’Hanlon et al., “Targeted disruption of nonribosomal peptide synthetase Pes3 augments the virulence of Aspergillus fumigatus,” Infect. Immun., vol. 79, no. 10, pp. 3978–3992, 2011.
nonfocal	Eukaryota	Aspergillus niger	F. Wang et al., “FluG affects secretion in colonies of Aspergillus niger,” Antonie Van Leeuwenhoek, vol. 107, no. 1, pp. 225–240, Jan. 2015.
nonfocal	Bacteria	Bacillus anthacis	H. Antelmann et al., “The extracellular and cytoplasmic proteomes of the non-virulent Bacillus anthracis strain UM23C1-2,” Proteomics, vol. 5, no. 14, pp. 3684–3695, 2005.
nonfocal	Bacteria	Bacillus anthacis	K. D. Passalacqua et al., “Strand-specific RNA-seq reveals ordered patterns of sense and antisense transcription in Bacillus anthracis,” PLoS One, vol. 7, no. 8, 2012.
focal	Bacteria	Bacillus cereus	M. H. Godsey et al., “The 2.2 Å resolution crystal structure of Bacillus cereus Nif3-family protein YqfO reveals a conserved dimetal-binding motif and a regulatory domain,” Protein Sci., vol. 16, no. 7, pp. 1285–1293, 2007.
nonfocal	Bacteria	Bacillus subtilis	Ö. Baysal et al., “A Proteomic Approach Provides New Insights into the Control of Soil-Borne Plant Pathogens by Bacillus Species,” PLoS One, vol. 8, no. 1, 2013.
focal	Bacteria	Bacillus subtilis	M. Ogura, T. Sato, and K. Abe, “Bacillus subtilis YlxR, Which Is Involved in Glucose-Responsive Metabolic Changes, Regulates Expression of tsaD for Protein Quality Control of Pyruvate Dehydrogenase,” Front. Microbiol., vol. 10, no. May, pp. 1–15, 2019.
nonfocal	Bacteria	Bacillus subtilis	M. Ogura and K. Asai, “Glucose induces ECF sigma factor genes, sigX and sigM, independent of cognate anti-sigma factors through acetylation of CshA in bacillus subtilis,” Front. Microbiol., vol. 7, no. NOV, pp. 1–13, 2016.
nonfocal	Bacteria	Bacillus subtilis	M. Ogura and Y. Kanesaki, “Newly Identified Nucleoid-Associated-Like Protein YlxR Regulates Metabolic Gene Expression in Bacillus subtilis Mitsuo,” mSphere, vol. 3, no. e00501-18, pp. 1–15, 2018.
nonfocal	Bacteria	Bacillus subtilis	A. Manzourolajdad and J. Arnold, “Secondary structural entropy in RNA switch (Riboswitch) identification,” BMC Bioinformatics, vol. 16, no. 1, 2015.
nonfocal	Bacteria	Bacillus subtilis	P. P. Cardenas, B. Carrasco, H. Sanchez, G. Deikus, D. H. Bechhofer, and J. C. Alonso, “Bacillus subtilis polynucleotide phosphorylase 3′-to-5′ DNase activity is involved in DNA repair,” Nucleic Acids Res., vol. 37, no. 12, pp. 4157–4169, Jul. 2009.
nonfocal	Bacteria	Bacillus subtilis	V. Ramaniuk, “Factors interacting with bacterial RNA polymerase and their effect on the regulation of transcription initiation,” Czech Academy of Sciences, 2018.
nonfocal	Bacteria	Bacteroides fragilis	M. Tajkarimi and H. M. Wexler, “CRISPR-Cas Systems in Bacteroides fragilis, an Important Pathobiont in the Human Gut Microbiome,” Front. Microbiol., vol. 8, no. NOV, pp. 1–21, Nov. 2017.
nonfocal	Eukaryota	Beauveria bassiana	G. Dionisio, P. Kryger, and T. Steenberg, “Label-Free Differential Proteomics and Quantification of Exoenzymes from Isolates of the Entomopathogenic Fungus Beauveria bassiana,” Insects, vol. 7, no. 4, p. 54, Oct. 2016.
nonfocal	Bacteria	Bifidobacterium longum	J. Yuan et al., “A proteome reference map and proteomic analysis of Bifidobacterium longum NCC2705,” Mol. Cell. Proteomics, vol. 5, no. 6, pp. 1105–1118, 2006.
focal	Eukaryota	Bombyx mori	J. Chen et al., “All-trans retinoic acid affects subcellular localization of a novel bmnif3l protein: Functional deduce and tissue distribution of nif3l gene from silkworm (bombyx mori),” Arch. Insect Biochem. Physiol., vol. 74, no. 4, pp. 217–231, 2010.
nonfocal	Bacteria	Borrelia burgdorferi	M. S. Medrano, P. F. Policastro, T. G. Schwan, and J. Coburn, “Interaction of Borrelia burgdorferi Hbb with the p66 promoter,” Nucleic Acids Res., vol. 38, no. 2, pp. 414–427, 2009.
nonfocal	Bacteria	Borrelia burgdorferi	J. A. Livengood, V. L. Schmit, and R. D. Gilmore, “Global transcriptome analysis of Borrelia burgdorferi during association with human neuroglial cells,” Infect. Immun., vol. 76, no. 1, pp. 298–307, 2008.
nonfocal	Bacteria	Borrelia burgdorferi	R. Iyer and I. Schwartz, “Microarray-Based Comparative Genomic and Transcriptome Analysis of Borrelia burgdorferi,” Microarrays, vol. 5, no. 2, p. 9, 2016.
nonfocal	Bacteria	Buchnera sp.	A. Manzano-Marín, “No evidence for Wolbachia as a nutritional co-obligate endosymbiont in the aphid Pentalonia nigronervosa,” bioRxiv, p. 609511, 2019.
nonfocal	Bacteria	Buchnera sp.	Z. Jiang et al., “Comparative analysis of genome sequences from four strains of the Buchnera aphidicola Mp endosymbion of the green peach aphid, Myzus persicae,” BMC Genomics, vol. 14, no. 1, p. 917, 2013.
nonfocal	Bacteria	Burkholderia thailandensis	S. Wagley et al., “The twin arginine translocation system is essential for aerobic growth and full virulence of Burkholderia thailandensis,” J. Bacteriol., vol. 196, no. 2, pp. 407–416, 2014.
nonfocal	Bacteria	Campylobacter jejuni	P. Malik-Kale, C. T. Parker, and M. E. Konkel, “Culture of Campylobacter jejuni with sodium deoxycholate induces virulence gene expression,” 2008.
nonfocal	Bacteria	Campylobacter jejuni	A. S. Jama, “Cj0700 is a Remote CheZ Orthologue Involved in Campylobacter jejuni Chemotaxis Signal Transduction,” University of Leicester, 2014.
nonfocal	Bacteria	Campylobacter jejuni	I. Porcelli, M. Reuter, B. M. Pearson, T. Wilhelm, and A. H. M. van Vliet, “Parallel evolution of genome structure and transcriptional landscape in the Epsilonproteobacteria,” BMC Genomics, vol. 14, no. 1, p. 1, 2013.
nonfocal	Bacteria	Campylobacter jejuni, Helicobacter pylori, Wolinella succinogenes	K. A. Ryan, N. Karim, M. Worku, S. A. Moore, C. W. Penn, and P. W. O’Toole, “HP0958 is an essential motility gene in Helicobacter pylori,” FEMS Microbiol. Lett., vol. 248, no. 1, pp. 47–55, Jul. 2005.
nonfocal	Bacteria	Chlamydia pneumoniae	D. Esser, G. Alvarez-Llamas, M. P. de Vries, D. Weening, R. J. Vonk, and H. Roelofsen, “Sample Stability and Protein Composition of Saliva: Implications for Its Use as a Diagnostic Fluid.,” Biomark. Insights, vol. 3, pp. 25–27, Feb. 2008.
nonfocal	Bacteria	Chlamydia trachomatis	R. Samudrala, F. Heffron, and J. E. McDermott, “Accurate prediction of secreted substrates and identification of a conserved putative secretion signal for type iii secretion systems,” PLoS Pathog., vol. 5, no. 4, 2009.
nonfocal	Bacteria	Chlamydia trachomatis	W. Huston, “Chlamydia diagnostics and issues of treatment failure,” in Australian Sexual Health Conference, 2017.
nonfocal	Bacteria	Clostridium botulinum	W. Liang, Y. Bi, H. Wang, S. Dong, K. Li, and J. Li, “Gene Expression Profiling of Clostridium botulinum under Heat Shock Stress,” Biomed Res. Int., vol. 2013, pp. 1–8, 2013.
nonfocal	Bacteria	Clostridium botulinum	K. Selby, G. Mascher, P. Somervuo, M. Lindström, and H. Korkeala, “Heat shock and prolonged heat stress attenuate neurotoxin and sporulation gene expression in group i Clostridium botulinum strain ATCC 3502,” PLoS One, vol. 12, no. 5, pp. 1–22, 2017.
nonfocal	Bacteria	Clostridium difficile	N. Daou et al., “Impact of CodY protein on metabolism, sporulation and virulence in Clostridioides difficile ribotype 027,” PLoS One, vol. 14, no. 1, pp. 1–34, 2019.
nonfocal	Bacteria	Clostridium difficile	R. W. McKee, C. K. Harvest, and R. Tamayo, “Cyclic Diguanylate Regulates Virulence Factor Genes via Multiple Riboswitches in Clostridium difficile,” mSphere, vol. 3, no. 5, pp. 1–15, 2018.
nonfocal	Bacteria	Clostridium difficile	R. A. Stabler et al., “In-depth genetic analysis of Clostridium difficile PCR-ribotype 027 strains reveals high genome fluidity including point mutations and inversions,” Gut Microbes, vol. 1, no. 4, pp. 269–276, 2010.
nonfocal	Bacteria	Clostridium difficile	T. M. Charlton, A. Kovacs-Simon, S. L. Michell, N. F. Fairweather, and E. W. Tate, “Quantitative Lipoproteomics in Clostridium difficile Reveals a Role for Lipoproteins in Sporulation,” Chem. Biol., vol. 22, no. 11, pp. 1562–1573, 2015.
nonfocal	Bacteria	Clostridium difficile	B. P. Girinathan, J. Ou, B. Dupuy, and R. Govind, “Pleiotropic roles of Clostridium difficile sin locus,” PLoS Pathog., vol. 14, no. 3, pp. 1–32, 2018.
nonfocal	Bacteria	Corynebacterium diphtheriae	M. Wittchen et al., “Transcriptome sequencing of the human pathogen Corynebacterium diphtheriae NCTC 13129 provides detailed insights into its transcriptional landscape and into DtxR-mediated transcriptional regulation,” BMC Genomics, vol. 19, no. 1, p. 82, Dec. 2018.
nonfocal	Eukaryota	Cricetulus griseus	H. Falkenberg et al., “Mass spectrometric evaluation of upstream and downstream process influences on host cell protein patterns in biopharmaceutical products,” Biotechnol. Prog., vol. 35, no. 3, p. e2788, May 2019.
nonfocal	Bacteria	Desulfovibrio desulfuricans	Q. Luo, J. L. Groh, J. D. Ballard, and L. R. Krumholz, “Identification of genes that confer sediment fitness to Desulfovibrio desulfuricans G20,” Appl. Environ. Microbiol., vol. 73, no. 19, pp. 6305–6312, 2007.
nonfocal	Bacteria	Desulfovibrio desulfuricans	Q. Luo, “Genes Required for Sediment Fitness in Desulfovibrio desulfuricans G20,” University of Oklahoma, 2005.
nonfocal	Eukaryota	Drosophila melanogaster	M. Ashburner et al., “An exploration of the sequence of a 2.9-Mb region of the genome of Drosophila melanogaster: the Adh region.,” Genetics, vol. 153, no. 1, pp. 179–219, Sep. 1999.
nonfocal	Eukaryota	Drosophila melanogaster	R. Geisler, A. Bergmann, Y. Hiromi, and C. Nüsslein-Volhard, “cactus, a gene involved in dorsoventral pattern formation of Drosophila, is related to the IκB gene family of vertebrates,” Cell, vol. 71, no. 4, pp. 613–621, Nov. 1992.
focal	Bacteria	Escherichia coli	J. E. Ladner et al., “Crystal structure of Escherichia coli protein ybgI, a toroidal structure with a dinuclear metal site,” BMC Struct. Biol., vol. 3, pp. 1–8, 2003.
nonfocal	Bacteria	Escherichia coli	M. Y. Galperin and E. V. Koonin, “From complete genome sequence to ‘complete’ understanding?,” Trends Biotechnol., vol. 28, no. 8, pp. 398–406, Aug. 2010.
nonfocal	Bacteria	Escherichia coli	J. P. Rooney et al., “Systems based mapping demonstrates that recovery from alkylation damage requires DNA repair, RNA processing, and translation associated networks,” Genomics, vol. 93, no. 1, pp. 42–51, Jan. 2009.
nonfocal	Bacteria	Escherichia coli	J. J. Díaz-Mejía, M. Babu, and A. Emili, “Computational and experimental approaches to chart the Escherichia coli cell-envelope-associated proteome and interactome,” FEMS Microbiol. Rev., vol. 33, no. 1, pp. 66–97, 2009.
nonfocal	Bacteria	Escherichia coli	R. T. Byrne, S. H. Chen, E. A. Wood, E. L. Cabot, and M. M. Cox, “Escherichia coli genes and pathways involved in surviving extreme exposure to ionizing radiation,” J. Bacteriol., vol. 196, no. 20, pp. 3534–3545, 2014.
focal	Bacteria	Escherichia coli	O. V. Sergeeva, D. O. Bredikhin, M. V. Nesterchuk, M. V. Serebryakova, P. V. Sergiev, and O. A. Dontsova, “Possible Role of Escherichia coli Protein YbgI,” Biochem., vol. 83, no. 3, pp. 270–280, 2018.
nonfocal	Bacteria	Escherichia coli	N. Škunca et al., “Phyletic Profiling with Cliques of Orthologs Is Enhanced by Signatures of Paralogy Relationships,” PLoS Comput. Biol., vol. 9, no. 1, 2013.
nonfocal	Bacteria	Escherichia coli	D. Ghersi and R. Sanchez, “Beyond structural genomics: computational approaches for the identification of ligand binding sites in protein structures,” J. Struct. Funct. Genomics, vol. 12, no. 2, pp. 109–117, 2011.
nonfocal	Bacteria	Escherichia coli	D. K. Rollins, D. Zhai, A. L. Joe, J. W. Guidarelli, A. Murarka, and R. Gonzalez, “A novel data mining method to identify assay-specific signatures in functional genomic studies,” BMC Bioinformatics, vol. 7, pp. 1–20, 2006.
nonfocal	Bacteria	Escherichia coli	P. J. Pomposiello, M. H. J. Bennik, and B. Demple, “Genome-Wide Transcriptional Profiling of the Escherichia coli Responses to Superoxide Stress and Sodium Salicylate,” J. Bacteriol., vol. 183, no. 13, pp. 3890–3902, 2001.
nonfocal	Bacteria	Escherichia coli	C. A. Pattrick, J. P. Webb, J. Green, R. R. Chaudhuri, M. O. Collins, and D. J. Kelly, “Proteomic Profiling, Transcription Factor Modeling, and Genomics of Evolved Tolerant Strains Elucidate Mechanisms of Vanillin Toxicity in Escherichia coli,” mSystems, vol. 4, no. 4, pp. 1–29, 2019.
nonfocal	Bacteria	Escherichia coli	M.-J. Han and S. Y. Lee, “The Escherichia coli Proteome: Past, Present, and Future Prospects,” Microbiol. Mol. Biol. Rev., vol. 70, no. 2, pp. 362–439, Jun. 2006.
nonfocal	Bacteria	Escherichia coli	R. G. Martin, W. K. Gillette, N. I. Martin, and J. L. Rosner, “Complex formation between activator and RNA polymerase as the basis for transcriptional activation by MarA and SoxS in Escherichia coli,” Mol. Microbiol., vol. 43, no. 2, pp. 355–370, Mar. 2002.
nonfocal	Bacteria	Escherichia coli	Y.-H. Ho, P. Shah, Y.-W. Chen, and C.-S. Chen, “Systematic Analysis of Intracellular-targeting Antimicrobial Peptides, Bactenecin 7, Hybrid of Pleurocidin and Dermaseptin, Proline–Arginine-rich Peptide, and Lactoferricin B, by Using Escherichia coli Proteome Microarrays,” Mol. Cell. Proteomics, vol. 15, no. 6, pp. 1837–1847, Jun. 2016.
nonfocal	Bacteria	Escherichia coli	A. Suzuki, T. Ando, I. Yamato, and S. Miyazaki, “FCANAL: Structure based protein function prediction method. Application to enzymes and binding proteins,” Chem-Bio Informatics J., vol. 5, no. 3, pp. 39–55, 2006.
nonfocal	Bacteria	Escherichia coli	G. Su et al., “Toxicogenomic mechanisms of 6-HO-BDE-47, 6-MeO-BDE-47, and BDE-47 in E. coli,” Environ. Sci. Technol., vol. 46, no. 2, pp. 1185–1191, 2012.
nonfocal	Bacteria	Escherichia coli	D. Chung et al., “dPeak: High Resolution Identification of Transcription Factor Binding Sites from PET and SET ChIP-Seq Data,” PLoS Comput. Biol., vol. 9, no. 10, p. e1003246, Oct. 2013.
nonfocal	Bacteria	Escherichia coli	Y. Yao, L. Fan, Y. Shi, I. Odsbu, and Morigen, “A Spatial Control for Correct Timing of Gene Expression during the Escherichia coli Cell Cycle,” Genes (Basel)., vol. 8, no. 1, p. 1, Dec. 2016.
nonfocal	Bacteria	Escherichia coli	Y. Wei, J. M. Lee, D. R. Smulski, and R. A. LaRossa, “Global impact of sdiA amplification revealed by comprehensive gene expression profiling of Escherichia coli,” J. Bacteriol., vol. 183, no. 7, pp. 2265–2272, 2001.
nonfocal	Bacteria	Escherichia coli	C. Park, S. Zhou, J. Gilmore, and S. Marqusee, “Energetics-based Protein Profiling on a Proteomic Scale: Identification of Proteins Resistant to Proteolysis,” J. Mol. Biol., vol. 368, no. 5, pp. 1426–1437, 2007.
nonfocal	Bacteria	Escherichia coli	C. Dartigalongue, H. Loferer, and S. Raina, “EcfE, a new essential inner membrane protease: Its role in the regulation of heat shock response in Escherichia coli,” EMBO J., vol. 20, no. 21, pp. 5908–5918, 2001.
nonfocal	Bacteria	Escherichia coli	T. Shimada, N. Fujita, K. Yamamoto, and A. Ishihama, “Novel Roles of cAMP Receptor Protein (CRP) in Regulation of Transport and Metabolism of Carbon Sources,” PLoS One, vol. 6, no. 6, p. e20081, Jun. 2011.
nonfocal	Bacteria	Escherichia coli	N. Thorenoor et al., “Localization of the death effector domain of fas-associated death domain protein into the membrane of escherichia coli induces reactive oxygen species-involved cell death,” Biochemistry, vol. 49, no. 7, pp. 1435–1447, 2010.
nonfocal	Bacteria	Escherichia coli	L. Gao, X. Ma, J. Hu, X. Zhang, and T. Chai, “Proteomic analysis of ESBL-producing Escherichia coli under bentonite condition,” Environ. Sci. Pollut. Res., pp. 22305–22311, 2019.
nonfocal	Bacteria	Escherichia coli	C. M. Gifford and S. S. Wallace, “The genes encoding endonuclease VIII and endonuclease III in Escherichia coli are transcribed as the terminal genes in operons,” Nucleic Acids Res., vol. 28, no. 3, pp. 762–769, Feb. 2000.
nonfocal	Bacteria	Escherichia coli, Bacillus subtilis	T. D. Niehaus, A. M. Thamm, V. de Crécy-Lagard, and A. D. Hanson, “Proteins of unknown biochemical function - A persistent problem and a roadmap to help overcome it,” Plant Physiol., vol. 169, no. November, p. pp.00959.2015, 2015.
nonfocal	Bacteria, Eukaryota	Escherichia coli, Schizosaccharomyces pombe	J. P. Rooney et al., “Cross-species Functionome analysis identifies proteins associated with DNA repair, translation and aerobic respiration as conserved modulators of UV-toxicity,” Genomics, vol. 97, no. 3, pp. 133–147, 2011.
nonfocal	Bacteria	Exiguobacterium antarcticum	W. L. O. Da Costa et al., “Functional annotation of hypothetical proteins from the Exiguobacterium antarcticum strain B7 reveals proteins involved in adaptation to extreme environments, including high arsenic resistance,” PLoS One, vol. 13, no. 6, pp. 1–28, 2018.
nonfocal	Bacteria	Fusobacterium nucleatum	I. Comas, F. González-Candelas, and M. Zúñiga, “Unraveling the evolutionary history of the phosphoryl-transfer chain of the phosphoenolpyruvate:phosphotransferase system through phylogenetic analyses and genome context,” BMC Evol. Biol., vol. 8, no. 1, p. 147, 2008.
focal	Bacteria	Geobacillus stearothermophilus	S. Shulami et al., “Multiple regulatory mechanisms control the expression of the geobacillus stearothermophilus gene for extracellular xylanase,” J. Biol. Chem., vol. 289, no. 37, pp. 25957–25975, 2014.
nonfocal	Bacteria	Geobacillus stearothermophilus	M. J. A. Daas et al., “Engineering Geobacillus thermodenitrificans to introduce cellulolytic activity; expression of native and heterologous cellulase genes,” BMC Biotechnol., vol. 18, no. 1, pp. 1–13, 2018.
nonfocal	Bacteria	Geobacillus stearothermophilus	M. J. A. Daas, A. H. P. Van de Weijer, W. M. De Vos, J. Van der Oost, and R. Van Kranenburg, “Isolation of a genetically accessible thermophilic xylan degrading bacterium from compost,” Biotechnol. Biofuels, vol. 9, no. 1, pp. 1–13, 2016.
nonfocal	Bacteria	Geobacillus stearothermophilus	S. Shulami et al., “A two-component system regulates the expression of an ABC transporter for xylo-oligosaccharides in Geobacillus stearothermophilus,” Appl. Environ. Microbiol., vol. 73, no. 3, pp. 874–884, 2007.
nonfocal	Bacteria	Geobacillus stearothermophilus	S. Shulami, O. Gat, A. L. Sonenshein, and Y. Shoham, “The glucuronic acid utilization gene cluster from Bacillus stearothermophilus T-6,” J. Bacteriol., vol. 181, no. 12, pp. 3695–3704, 1999.
nonfocal	Bacteria	Geobacillus stearothermophilus	O. Alalouf, Y. Balazs, M. Volkinshtein, Y. Grimpel, G. Shoham, and Y. Shoham, “A new family of carbohydrate esterases is represented by a GDSL hydrolase/acetylxylan esterase from Geobacillus stearothermophilus,” J. Biol. Chem., vol. 286, no. 49, pp. 41993–42001, 2011.
nonfocal	Bacteria	Geobacter sulfurreducens	C. Leang et al., “Adaptation to Disruption of the Electron Transfer Pathway for Fe(III) Reduction in Geobacter sulfurreducens,” Society, vol. 187, no. 17, pp. 5918–5926, 2005.
nonfocal	Bacteria	Haemophilus ducreyi	C. L. Hews, T. Cho, G. Rowley, and T. L. Raivio, “Maintaining Integrity Under Stress: Envelope Stress Response Regulation of Pathogenesis in Gram-Negative Bacteria,” Front. Cell. Infect. Microbiol., vol. 9, no. 15, pp. 3486–3502, Sep. 2019.
nonfocal	Bacteria	Haemophilus ducreyi	M. Labandeira-Rey, J. R. Mock, and E. J. Hansen, “Regulation of Expression of the Haemophilus ducreyi LspB and LspA2 Proteins by CpxR,” Infect. Immun., vol. 77, no. 8, pp. 3402–3411, Aug. 2009.
nonfocal	Bacteria	Haemophilus ducreyi	S. M. Spinola et al., “Activation of the CpxRA System by Deletion of cpxA Impairs the Ability of Haemophilus ducreyi To Infect Humans,” Infect. Immun., vol. 78, no. 9, pp. 3898–3904, Sep. 2010.
nonfocal	Bacteria	Haemophilus ducreyi	D. Gangaiah et al., “Haemophilus ducreyi Hfq Contributes to Virulence Gene Regulation as Cells Enter Stationary Phase,” MBio, vol. 5, no. 1, pp. 1–13, Feb. 2014.
nonfocal	Bacteria	Haemophilus influenzae	E. Kolker, “Identification and functional analysis of ‘hypothetical’ genes expressed in Haemophilus influenzae,” Nucleic Acids Res., vol. 32, no. 8, pp. 2353–2361, Apr. 2004.
nonfocal	Bacteria	Haemophilus influenzae	Y. Furuta, K. Abe, and I. Kobayashi, “Genome comparison and context analysis reveals putative mobile forms of restriction–modification systems and related rearrangements,” Nucleic Acids Res., vol. 38, no. 7, pp. 2428–2443, Apr. 2010.
nonfocal	Bacteria	Haemophilus influenzae	M. Shahbaaz, Md. ImtaiyazHassan, and F. Ahmad, “Functional Annotation of Conserved Hypothetical Proteins from Haemophilus influenzae Rd KW20,” PLoS One, vol. 8, no. 12, p. e84263, Dec. 2013.
nonfocal	Bacteria	Haemophilus influenzae	S. W. Dickey, “Rhomboid Proteolysis is a Rate-Governed Reaction, Yet is Dispensable for E. coli Colonization of the Mouse Colon,” The Johns Hopkins University, 2013.
nonfocal	Archaea	Haloferax volcanii	L. Prunetti et al., “Deciphering the Translation Initiation Factor 5A Modification Pathway in Halophilic Archaea,” Archaea, vol. 2016, pp. 1–14, 2016.
nonfocal	Archaea	Haloferax volcanii	J. H. Martin et al., “GlpR Is a Direct Transcriptional Repressor of Fructose Metabolic Genes in Haloferax volcanii,” J. Bacteriol., vol. 200, no. 17, pp. 1–18, Jun. 2018.
focal	Bacteria	Helicobacter pylori	H.-P. Choi et al., “Biochemical Characterization of Hypothetical Proteins from Helicobacter pylori,” PLoS One, vol. 8, no. 6, p. e66605, Jun. 2013.
nonfocal	Bacteria	Helicobacter pylori	Y.-C. Chang et al., “COMBREX-DB: an experiment centered database of protein function: knowledge, predictions and knowledge gaps,” Nucleic Acids Res., vol. 44, no. D1, pp. D330–D335, Jan. 2016.
nonfocal	Bacteria	Helicobacter pylori, Wolinella succinogenes	L. E. Pereira, J. Tsang, J. Mrázek, and T. R. Hoover, “The zinc-ribbon domain of Helicobacter pylori HP0958: requirement for RpoN accumulation and possible roles of homologs in other bacteria,” Microb. Inform. Exp., vol. 1, no. 1, p. 8, 2011.
focal	Eukaryota	Homo sapiens	S. Tascou, T. W. Kang, R. Trappe, W. Engel, and P. Burfeind, “Identification and characterization of NIF3L1 BP1, a novel cytoplasmic interaction partner of the NIF3L1 protein,” Biochem. Biophys. Res. Commun., vol. 309, no. 2, pp. 440–448, 2003.
focal	Eukaryota	Homo sapiens	S. Hadano et al., “Cloning and characterization of three novel genes, ALS2CR1, ALS2CR2, and ALS2CR3, in the juvenile amyotrophic lateral sclerosis (ALS2) critical region at chromosome 2q33-q34: Candidate genes for ALS2,” Genomics, vol. 71, no. 2, pp. 200–213, 2001.
nonfocal	Eukaryota	Homo sapiens	B. Xia, Y. Li, J. Zhou, B. Tian, and L. Feng, “Identification of potential pathogenic genes associated with osteoporosis,” Bone Jt. Res., vol. 6, no. 12, pp. 640–648, 2017.
nonfocal	Eukaryota	Homo sapiens	N. J. Camp et al., “Discordant Haplotype Sequencing Identifies Functional Variants at the 2q33 Breast Cancer Risk Locus,” Cancer Res., vol. 76, no. 7, pp. 1916–1925, Apr. 2016.
nonfocal	Eukaryota	Homo sapiens	M. A. Nalls et al., “Extended tracts of homozygosity identify novel candidate genes associated with late-onset Alzheimer’s disease,” Neurogenetics, vol. 10, no. 3, pp. 183–190, Jul. 2009.
nonfocal	Eukaryota	Homo sapiens	S. S. S. J. Ahmed, A. R. Ahameethunisa, W. Santosh, S. Chakravarthy, and S. Kumar, “Systems biological approach on neurological disorders: a novel molecular connectivity to aging and psychiatric diseases,” BMC Syst. Biol., vol. 5, no. 1, p. 6, 2011.
nonfocal	Eukaryota	Homo sapiens	G. Antoniali et al., “Mammalian APE1 controls miRNA processing and its interactome is linked to cancer RNA metabolism,” Nat. Commun., vol. 8, no. 1, p. 797, Dec. 2017.
nonfocal	Eukaryota	Homo sapiens	P. Bhatraju et al., “Associations between single nucleotide polymorphisms in the FAS pathway and acute kidney injury,” Crit. Care, vol. 19, no. 1, p. 368, Dec. 2015.
nonfocal	Eukaryota	Homo sapiens	L. Chauhan et al., “Genome-wide association analysis identified splicing single nucleotide polymorphism in CFLAR predictive of triptolide chemo-sensitivity,” BMC Genomics, vol. 16, no. 1, p. 483, Dec. 2015.
nonfocal	Eukaryota	Homo sapiens	C. M. Duzyj, M. J. Paidas, L. Jebailey, J. Huang, and E. R. Barnea, “PreImplantation factor (PIF*) promotes embryotrophic and neuroprotective decidual genes: effect negated by epidermal growth factor,” J. Neurodev. Disord., vol. 6, no. 1, p. 36, 2014.
nonfocal	Eukaryota	Homo sapiens	B. J. Fenner et al., “A cellular and proteomic approach to assess proteins extracted from cryopreserved human amnion in the cultivation of corneal stromal keratocytes for stromal cell therapy,” Eye Vis., vol. 6, no. 1, p. 30, Dec. 2019.
nonfocal	Eukaryota	Homo sapiens	J. Gawinecka et al., “Sporadic Creutzfeldt-Jakob disease subtype-specific alterations of the brain proteome: Impact on Rab3a recycling,” Proteomics, vol. 12, no. 23–24, pp. 3610–3620, 2012.
nonfocal	Eukaryota	Homo sapiens	P. E. Geyer et al., “Plasma Proteome Profiling to detect and avoid sample‐related biases in biomarker studies,” EMBO Mol. Med., vol. 11, no. 11, pp. 1–12, Nov. 2019.
nonfocal	Eukaryota	Homo sapiens	C. R. Giannangelo, “Biochemical pathways and molecular targets involved in the mechanism of action of ozonide antimalarials in Plasmodium falciparum,” Monash University, 2018.
nonfocal	Eukaryota	Homo sapiens	B. Giotti et al., “Assembly of a parts list of the human mitotic cell cycle machinery,” J. Mol. Cell Biol., vol. 11, no. 8, pp. 703–718, Aug. 2019.
nonfocal	Eukaryota	Homo sapiens	S. Gräf et al., “Identification of rare sequence variation underlying heritable pulmonary arterial hypertension,” Nat. Commun., vol. 9, no. 1, p. 1416, Dec. 2018.
nonfocal	Eukaryota	Homo sapiens	N. S. Hadj-Hamou, “Functional Signatures of Radio-induction in Sarcomas Developing in the Radiation Field After Radiotherapy,” University of Paris, 2010.
nonfocal	Eukaryota	Homo sapiens	T.-S. He et al., “THO Complex Subunit 7 Homolog Negatively Regulates Cellular Antiviral Response against RNA Viruses by Targeting TBK1,” Viruses, vol. 11, no. 2, p. 158, Feb. 2019.
nonfocal	Eukaryota	Homo sapiens	M. Johnson et al., “Genomic and transcriptomic comparison of allergen and silver nanoparticle-induced mast cell degranulation reveals novel non-immunoglobulin E mediated mechanisms,” PLoS One, vol. 13, no. 3, p. e0193499, Mar. 2018.
nonfocal	Eukaryota	Homo sapiens	M. Kai et al., “TET1 Depletion Induces Aberrant CpG Methylation in Colorectal Cancer Cells,” PLoS One, vol. 11, no. 12, p. e0168281, Dec. 2016.
nonfocal	Eukaryota	Homo sapiens	K. R. Kalari et al., “An Integrated Model of the Transcriptome of HER2-Positive Breast Cancer,” PLoS One, vol. 8, no. 11, p. e79298, Nov. 2013.
nonfocal	Eukaryota	Homo sapiens	H. Kölbel, D. Hathazi, M. Jennings, R. Horvath, A. Roos, and U. Schara, “Identification of Candidate Protein Markers in Skeletal Muscle of Laminin-211-Deficient CMD Type 1A-Patients,” Front. Neurol., vol. 10, no. MAY, May 2019.
nonfocal	Eukaryota	Homo sapiens	K. Kusonmano et al., “Identification of highly connected and differentially expressed gene subnetworks in metastasizing endometrial cancer,” PLoS One, vol. 13, no. 11, pp. 1–21, 2018.
focal	Eukaryota	Homo sapiens	Y. Li, B. Xie, Z. Jiang, and B. Yuan, “Relationship between osteoporosis and osteoarthritis based on DNA methylation.,” Int. J. Clin. Exp. Pathol., vol. 12, no. 9, pp. 3399–3407, 2019.
nonfocal	Eukaryota	Homo sapiens	C.-Y. Lin et al., “Discovery of estrogen receptor alpha target genes and response elements in breast tumor cells.,” Genome Biol., vol. 5, no. 9, p. R66, 2004.
nonfocal	Eukaryota	Homo sapiens	L. Liu et al., “DAWN: a framework to identify autism genes and subnetworks using gene expression and genetics,” Mol. Autism, vol. 5, no. 1, p. 22, 2014.
nonfocal	Eukaryota	Homo sapiens	L. Liu et al., “Insight into novel RNA-binding activities via large-scale analysis of lncRNA-bound proteome and IDH1-bound transcriptome,” Nucleic Acids Res., vol. 47, no. 5, pp. 2244–2262, Mar. 2019.
nonfocal	Eukaryota	Homo sapiens	T.-P. Lu, Y.-Y. Hsu, L.-C. Lai, M.-H. Tsai, and E. Y. Chuang, “Identification of Gene Expression Biomarkers for Predicting Radiation Exposure,” Sci. Rep., vol. 4, no. 1, p. 6293, May 2015.
focal	Eukaryota	Homo sapiens	G. Merla, C. Howald, S. E. Antonarakis, and A. Reymond, “The subcellular localization of the ChoRE-binding protein, encoded by the Williams-Beuren syndrome critical region gene 14, is regulated by 14-3-3,” Hum. Mol. Genet., vol. 13, no. 14, pp. 1505–1514, 2004.
nonfocal	Eukaryota	Homo sapiens	A. E. Oja et al., “Trigger-happy resident memory CD4+ T cells inhabit the human lungs,” Mucosal Immunol., vol. 11, no. 3, pp. 654–667, May 2018.
nonfocal	Eukaryota	Homo sapiens	D. Patel, D. Ythier, F. Brozzi, D. L. Eizirik, and B. Thorens, “Clic4, a novel protein that sensitizes β-cells to apoptosis,” Mol. Metab., vol. 4, no. 4, pp. 253–264, 2015.
nonfocal	Eukaryota	Homo sapiens	L. Qiu and X. Liu, “Identification of key genes involved in myocardial infarction,” Eur. J. Med. Res., vol. 24, no. 1, p. 22, Dec. 2019.
nonfocal	Eukaryota	Homo sapiens	D. A. Quigley et al., “The 5p12 breast cancer susceptibility locus affects MRPS30 expression in estrogen-receptor positive tumors,” Mol. Oncol., vol. 8, no. 2, pp. 273–284, Mar. 2014.
nonfocal	Eukaryota	Homo sapiens	J. Rijlaarsdam et al., “An epigenome-wide association meta-analysis of prenatal maternal stress in neonates: A model approach for replication,” Epigenetics, vol. 11, no. 2, pp. 140–149, Feb. 2016.
nonfocal	Eukaryota	Homo sapiens	C. Rylander, V. Dumeaux, K. S. Olsen, M. Waaseth, T. M. Sandanger, and E. Lund, “Using blood gene signatures for assessing effects of exposure to perfluoroalkyl acids (PFAAs) in humans: The NOWAC postgenome study,” Int. J. Mol. Epidemiol. Genet., vol. 2, no. 3, pp. 207–216, 2011.
nonfocal	Eukaryota	Homo sapiens	M. E. Sáez et al., “Genome Wide Meta-Analysis identifies common genetic signatures shared by heart function and Alzheimer’s disease,” Sci. Rep., vol. 9, no. 1, p. 16665, Dec. 2019.
nonfocal	Eukaryota	Homo sapiens	M. R. Sailani et al., “DNA-Methylation Patterns in Trisomy 21 Using Cells from Monozygotic Twins,” PLoS One, vol. 10, no. 8, p. e0135555, Aug. 2015.
nonfocal	Eukaryota	Homo sapiens	A. Schrader et al., “Identification of a new gene regulatory circuit involving B cell receptor activated signaling using a combined analysis of experimental, clinical and global gene expression data,” Oncotarget, vol. 7, no. 30, pp. 47061–47081, Jul. 2016.
nonfocal	Eukaryota	Homo sapiens	T. K. Sigdel et al., “Profiling of Autoantibodies in IgA Nephropathy, an Integrative Antibiomics Approach,” Clin. J. Am. Soc. Nephrol., vol. 6, no. 12, pp. 2775–2784, Dec. 2011.
nonfocal	Eukaryota	Homo sapiens	N. Simonis et al., “Host-pathogen interactome mapping for HTLV-1 and -2 retroviruses,” Retrovirology, vol. 9, no. 1, p. 26, 2012.
nonfocal	Eukaryota	Homo sapiens	N. H. Simpson et al., “Genome-wide analysis identifies a role for common copy number variants in specific language impairment,” Eur. J. Hum. Genet., vol. 23, no. 10, pp. 1370–1377, Oct. 2015.
nonfocal	Eukaryota	Homo sapiens	H. Skottman et al., “Gene Expression Signatures of Seven Individual Human Embryonic Stem Cell Lines,” Stem Cells, vol. 23, no. 9, pp. 1343–1356, Oct. 2005.
nonfocal	Eukaryota	Homo sapiens	F. G. Thankam, C. S. Boosani, M. F. Dilisio, and D. K. Agrawal, “MicroRNAs associated with inflammation in shoulder tendinopathy and glenohumeral arthritis,” Mol. Cell. Biochem., vol. 437, no. 1–2, pp. 81–97, Jan. 2018.
nonfocal	Eukaryota	Homo sapiens	Y. Tian et al., “Alteration in basal and depolarization induced transcriptional network in iPSC derived neurons from Timothy syndrome,” Genome Med., vol. 6, no. 10, p. 75, Oct. 2014.
nonfocal	Eukaryota	Homo sapiens	O. Tšuiko et al., “Copy number variation analysis detects novel candidate genes involved in follicular growth and oocyte maturation in a cohort of premature ovarian failure cases,” Hum. Reprod., vol. 31, no. 8, pp. 1913–1925, Aug. 2016.
nonfocal	Eukaryota	Homo sapiens	S. Uxa et al., “DREAM and RB cooperate to induce gene repression and cell-cycle arrest in response to p53 activation,” Nucleic Acids Res., vol. 47, no. 17, pp. 9087–9103, Sep. 2019.
nonfocal	Eukaryota	Homo sapiens	A. F. van Ouwerkerk et al., “Identification of atrial fibrillation associated genes and functional non-coding variants,” Nat. Commun., vol. 10, no. 1, p. 4755, Dec. 2019.
nonfocal	Eukaryota	Homo sapiens	L.-J. Wang et al., “Interactome-wide Analysis Identifies End-binding Protein 1 as a Crucial Component for the Speck-like Particle Formation of Activated Absence in Melanoma 2 (AIM2) Inflammasomes,” Mol. Cell. Proteomics, vol. 11, no. 11, pp. 1230–1244, Nov. 2012.
nonfocal	Eukaryota	Homo sapiens	L.-S. Wang et al., “Population-based study of genetic variation in individuals with autism spectrum disorders from Croatia,” BMC Med. Genet., vol. 11, no. 1, p. 134, Dec. 2010.
nonfocal	Eukaryota	Homo sapiens	M. Wang, L. Li, J. Liu, and J. Wang, “A gene interaction network‑based method to measure the common and heterogeneous mechanisms of gynecological cancer,” Mol. Med. Rep., vol. 18, no. 1, pp. 230–242, May 2018.
nonfocal	Eukaryota	Homo sapiens	D. Wei et al., “The Molecular Chaperone GRP78 Contributes to Toll-like Receptor 3-mediated Innate Immune Response to Hepatitis C Virus in Hepatocytes,” J. Biol. Chem., vol. 291, no. 23, pp. 12294–12309, Jun. 2016.
nonfocal	Eukaryota	Homo sapiens	A. O. Weinzierl et al., “Features of TAP-independent MHC class I ligands revealed by quantitative mass spectrometry,” Eur. J. Immunol., vol. 38, no. 6, pp. 1503–1510, Apr. 2008.
nonfocal	Eukaryota	Homo sapiens	D. A. Winer et al., “B cells promote insulin resistance through modulation of T cells and production of pathogenic IgG antibodies,” Nat. Med., vol. 17, no. 5, pp. 610–617, May 2011.
nonfocal	Eukaryota	Homo sapiens	Y. Xi et al., “Global comparative gene expression analysis of melanoma patient samples, derived cell lines and corresponding tumor xenografts.,” Cancer Genomics Proteomics, vol. 5, no. 1, pp. 1–35, 2011.
nonfocal	Eukaryota	Homo sapiens	Y. Xiang, C.-Q. Zhang, and K. Huang, “Predicting glioblastoma prognosis networks using weighted gene co-expression network analysis on TCGA data.,” BMC Bioinformatics, vol. 13 Suppl 2, no. Suppl 2, p. S12, Mar. 2012.
nonfocal	Eukaryota	Homo sapiens	G. Yu et al., “A discrete organoplatinum(II) metallacage as a multimodality theranostic platform for cancer photochemotherapy,” Nat. Commun., vol. 9, no. 1, p. 4335, Dec. 2018.
focal	Eukaryota	Homo sapiens	N. Yu, S. Shin, and K.-A. Lee, “First Korean Case of SATB2 -Associated 2q32-q33 Microdeletion Syndrome,” Ann. Lab. Med., vol. 35, no. 2, p. 275, 2015.
focal	Eukaryota	Homo sapiens	J. K. Lamba, T. Feldberg, T. M. Ghosh, N. Bhise, and B. Fridley, “Abstract 2214: Genome-wide association analysis identified genetic markers associated with triptolide cellular sensitivity using HapMap LCLs as model system.,” Cancer Res., vol. 73, no. 8 Supplement, pp. 2214 LP – 2214, Apr. 2013.
focal	Eukaryota	Homo sapiens, Mus musculus	S. Tascou, J. Uedelhoven, C. Dixkens, K. Nayernia, W. Engel, and P. Burfeind, “Isolation and characterization of a novel human gene, NIF3L1, and its mouse ortholog, Nif3l1, highly conserved from bacteria to mammals,” Cytogenet. Cell Genet., vol. 90, no. 3–4, pp. 330–336, 2000.
focal	Eukaryota	Homo sapiens, Mus musculus	H. Akiyama, N. Fujisawa, Y. Tashiro, N. Takanabe, A. Sugiyama, and F. Tashiro, “The role of transcriptional corepressor Nif3l1 in early stage of neural differentiation via cooperation with Trip15/CSN2,” J. Biol. Chem., vol. 278, no. 12, pp. 10752–10762, 2003.
nonfocal	Eukaryota	Homo sapiens, Xenopus sp.	O. El Bounkari et al., “Nuclear localization of the pre-mRNA associating protein THOC7 depends upon its direct interaction with Fms tyrosine kinase interacting protein (FMIP),” FEBS Lett., vol. 583, no. 1, pp. 13–18, Jan. 2009.
nonfocal	Eukaryota	Idiosepius paradoxus	A. Ogura, M. Yoshida, M. Fukuzaki, and J. Sese, “In vitro homology search array comprehensively reveals highly conserved genes and their functional characteristics in non-sequenced species,” BMC Genomics, vol. 11, no. Suppl 4, p. S9, 2010.
nonfocal	Bacteria	Legionella pneumophila	P. Aurass, B. Pless, K. Rydzewski, G. Holland, N. Bannert, and A. Flieger, “bdhA-patD Operon as a Virulence Determinant, Revealed by a Novel Large-Scale Approach for Identification of Legionella pneumophila Mutants Defective for Amoeba Infection,” Appl. Environ. Microbiol., vol. 75, no. 13, pp. 4506–4515, Jul. 2009.
nonfocal	Bacteria	Legionella pneumophila	T. J. O’Connor, D. Boyd, M. S. Dorer, and R. R. Isberg, “Aggravating Genetic Interactions Allow a Solution to Redundancy in a Bacterial Pathogen,” Science (80-. )., vol. 338, no. 6113, pp. 1440–1444, Dec. 2012.
nonfocal	Bacteria	Legionella pneumophila	S. Rankin, Z. Li, and R. R. Isberg, “Macrophage-Induced Genes of Legionella pneumophila: Protection from Reactive Intermediates and Solute Imbalance during Intracellular Growth,” Infect. Immun., vol. 70, no. 7, pp. 3637–3648, Jul. 2002.
nonfocal	Bacteria	Legionella pneumophila	D. Burstein et al., “Genomic analysis of 38 Legionella species identifies large and diverse effector repertoires,” Nat. Genet., vol. 48, no. 2, pp. 167–175, Feb. 2016.
nonfocal	Bacteria	Legionella pneumophila	R. L. Edwards, A. Bryan, M. Jules, K. Harada, C. Buchrieser, and M. S. Swanson, “Nicotinic Acid Modulates Legionella pneumophila Gene Expression and Induces Virulence Traits,” Infect. Immun., vol. 81, no. 3, pp. 945–955, Mar. 2013.
nonfocal	Eukaryota	Macaca sp.	L. Simon et al., “Δ9-Tetrahydrocannabinol (Δ9-THC) Promotes Neuroimmune-Modulatory MicroRNA Profile in Striatum of Simian Immunodeficiency Virus (SIV)-Infected Macaques,” J. Neuroimmune Pharmacol., vol. 11, no. 1, pp. 192–213, Mar. 2016.
nonfocal	Eukaryota	Macaca sp.	H. Yang et al., “Generation of haploid embryonic stem cells from Macaca fascicularis monkey parthenotes,” Cell Res., vol. 23, no. 10, pp. 1187–1200, Oct. 2013.
nonfocal	Eukaryota	Macaca sp.	J. Chen, H. Yamahachi, and C. D. Gilbert, “Experience-Dependent Gene Expression in Adult Visual Cortex,” Cereb. Cortex, vol. 20, no. 3, pp. 650–660, Mar. 2010.
focal	Archaea	Methanocaldococcus jannaschii	T. Fujishiro, U. Ermler, and S. Shima, “A possible iron delivery function of the dinuclear iron center of HcgD in [Fe]-hydrogenase cofactor biosynthesis,” FEBS Lett., vol. 588, no. 17, pp. 2789–2793, Aug. 2014.
focal	Archaea	Methanocaldococcus jannaschii	S. M. Kuan et al., “Crystallization and preliminary X-ray diffraction analysis of the Nif3-family protein MJ0927 from Methanocaldococcus jannaschii,” Acta Crystallogr. Sect. F Struct. Biol. Cryst. Commun., vol. 69, no. 1, pp. 80–82, 2013.
nonfocal	Archaea	Methanocaldococcus jannaschii	K. S. Makarova and E. V. Koonin, “Archaeal Ubiquitin-Like Proteins: Functional Versatility and Putative Ancestral Involvement in tRNA Modification Revealed by Comparative Genomic Analysis,” Archaea, vol. 2010, pp. 1–10, 2010.
nonfocal	Archaea	Methanocaldococcus jannaschii	T. Fujishiro et al., “Identification of HcgC as a SAM-Dependent Pyridinol Methyltransferase in [Fe]-Hydrogenase Cofactor Biosynthesis,” Angew. Chemie Int. Ed., vol. 55, no. 33, pp. 9648–9651, Aug. 2016.
nonfocal	Archaea	Methanocaldococcus jannaschii	T. Fujishiro, J. Kahnt, U. Ermler, and S. Shima, “Protein-pyridinol thioester precursor for biosynthesis of the organometallic acyl-iron ligand in [Fe]-hydrogenase cofactor,” Nat. Commun., vol. 6, no. 1, p. 6895, Nov. 2015.
nonfocal	Archaea	Methanocaldococcus jannaschii	L. Bai, T. Wagner, T. Xu, X. Hu, U. Ermler, and S. Shima, “A Water-Bridged H-Bonding Network Contributes to the Catalysis of the SAM-Dependent C-Methyltransferase HcgC,” Angew. Chemie Int. Ed., vol. 56, no. 36, pp. 10806–10809, Aug. 2017.
focal	Archaea	Methanocaldococcus jannaschii	S.-C. Chen et al., “Crystal Structure of a Conserved Hypothetical Protein MJ0927 from Methanocaldococcus jannaschii Reveals a Novel Quaternary Assembly in the Nif3 Family,” Biomed Res. Int., vol. 2014, pp. 1–8, 2014.
nonfocal	Archaea	Methanococcus maripaludis	T. J. Lie, K. C. Costa, D. Pak, V. Sakesan, and J. A. Leigh, “Phenotypic evidence that the function of the [Fe]-hydrogenase Hmd in Methanococcus maripaludis requires seven hcg ( hmd co-occurring genes) but not hmdII,” FEMS Microbiol. Lett., vol. 343, no. 2, pp. 156–160, Jun. 2013.
nonfocal	Bacteria	Moranella endobia	S. López-Madrigal, A. Latorre, M. Porcar, A. Moya, and R. Gil, “Mealybugs nested endosymbiosis: going into the ‘matryoshka’ system in Planococcus citri in depth,” BMC Microbiol., vol. 13, no. 1, p. 74, 2013.
nonfocal	Eukaryota	Mus musculus	M. K. Parente, R. Rozen, S. H. Seeholzer, and J. H. Wolfe, “Integrated analysis of proteome and transcriptome changes in the mucopolysaccharidosis type VII mouse hippocampus,” Mol. Genet. Metab., vol. 118, no. 1, pp. 41–54, May 2016.
nonfocal	Eukaryota	Mus musculus	R. A. Rachel, T. Li, and A. Swaroop, “Photoreceptor sensory cilia and ciliopathies: focus on CEP290, RPGR and their interacting proteins,” Cilia, vol. 1, no. 1, p. 22, 2012.
nonfocal	Eukaryota	Mus musculus	E. L. Huttlin et al., “A Tissue-Specific Atlas of Mouse Protein Phosphorylation and Expression,” Cell, vol. 143, no. 7, pp. 1174–1189, Dec. 2010.
nonfocal	Eukaryota	Mus musculus	V. Giuffrida et al., “Gene expression in mouse spermatogenesis during ontogenesis,” Int. J. Mol. Med., vol. 17, no. 3, pp. 523–528, Mar. 2006.
nonfocal	Eukaryota	Mus musculus	M. Zuccotti et al., “Maternal Oct-4 is a potential key regulator of the developmental competence of mouse oocytes,” BMC Dev. Biol., vol. 8, no. 1, p. 97, 2008.
nonfocal	Eukaryota	Mus musculus	J. M. Bhasin, E. Chakrabarti, D.-Q. Peng, A. Kulkarni, X. Chen, and J. D. Smith, “Sex Specific Gene Regulation and Expression QTLs in Mouse Macrophages from a Strain Intercross,” PLoS One, vol. 3, no. 1, p. e1435, Jan. 2008.
nonfocal	Eukaryota	Mus musculus	G. D. Lively et al., “Genetic Dependence of Central Corneal Thickness among Inbred Strains of Mice,” Investig. Opthalmology Vis. Sci., vol. 51, no. 1, p. 160, Jan. 2010.
nonfocal	Eukaryota	Mus musculus	I. Paul et al., “The ubiquitin ligase Cullin5SOCS2 regulates NDR1/STK38 stability and NF-κB transactivation,” Sci. Rep., vol. 7, no. 1, p. 42800, Mar. 2017.
nonfocal	Eukaryota	Mus musculus	D. M. Shin, C. H. Lee, and H. C. Morse, “IRF8 governs expression of genes involved in innate and adaptive immunity in human and mouse germinal center B cells,” PLoS One, vol. 6, no. 11, 2011.
nonfocal	Eukaryota	Mus musculus	E. L. Johnson et al., “Sphingolipid production by gut Bacteroidetes regulates glucose homeostasis,” bioRxiv, 2019.
nonfocal	Eukaryota	Mus musculus	L. Yan, X. Yao, D. Bachvarov, Z. Saifudeen, and S. S. El-Dahr, “Genome-wide analysis of gestational gene-environment interactions in the developing kidney,” Physiol. Genomics, vol. 46, no. 17, pp. 655–670, Sep. 2014.
nonfocal	Bacteria	Mycobacterium avium 104	L. E. Bermudez, L. Danelishvili, L. Babrack, and T. Pham, “Evidence for genes associated with the ability of Mycobacterium avium subsp. hominissuis to escape apoptotic macrophages,” Front. Cell. Infect. Microbiol., vol. 5, no. AUG, pp. 1–8, Aug. 2015.
nonfocal	Bacteria	Mycobacterium avium subsp. Paratuberculosis	A. Facciuolo, P. Gonzalez-Cano, S. Napper, P. J. Griebel, and L. M. Mutharia, “Marked Differences in Mucosal Immune Responses Induced in Ileal versus Jejunal Peyer’s Patches to Mycobacterium avium subsp. paratuberculosis Secreted Proteins following Targeted Enteric Infection in Young Calves,” PLoS One, vol. 11, no. 7, p. e0158747, Jul. 2016.
nonfocal	Bacteria	Mycobacterium avium subsp. Paratuberculosis	A. Facciuolo, D. F. Kelton, and L. M. Mutharia, “Novel Secreted Antigens of Mycobacterium paratuberculosis as Serodiagnostic Biomarkers for Johne’s Disease in Cattle,” Clin. Vaccine Immunol., vol. 20, no. 12, pp. 1783–1791, Dec. 2013.
nonfocal	Bacteria	Mycobacterium avium subsp. Paratuberculosis	W. S. Kim, M.-K. Shin, and S. J. Shin, “MAP1981c, a Putative Nucleic Acid-Binding Protein, Produced by Mycobacterium avium subsp. paratuberculosis, Induces Maturation of Dendritic Cells and Th1-Polarization,” Front. Cell. Infect. Microbiol., vol. 8, no. JUN, Jun. 2018.
nonfocal	Bacteria	Mycobacterium leprae str. Br4923	A. A. T. Naqvi, F. Ahmad, and M. I. Hassan, “Identification of functional candidates amongst hypothetical proteins of Mycobacterium leprae Br4923, a causative agent of leprosy,” Genome, vol. 58, no. 1, pp. 25–42, Jan. 2015.
nonfocal	Bacteria	Mycobacterium marinum	M. Boot et al., “iniBAC induction Is Vitamin B12- and MutAB-dependent in Mycobacterium marinum,” J. Biol. Chem., vol. 291, no. 38, pp. 19800–19812, Sep. 2016.
nonfocal	Bacteria	Mycobacterium smegmatis	R. S. Gupta, B. Lo, and J. Son, “Phylogenomics and Comparative Genomic Studies Robustly Support Division of the Genus Mycobacterium into an Emended Genus Mycobacterium and Four Novel Genera,” Front. Microbiol., vol. 9, no. FEB, pp. 1–41, Feb. 2018.
nonfocal	Bacteria	Mycobacterium smegmatis	R. Gupta, D. Chatterjee, M. S. Glickman, and S. Shuman, “Division of labor among Mycobacterium smegmatis RNase H enzymes: RNase H1 activity of RnhA or RnhC is essential for growth whereas RnhB and RnhA guard against killing by hydrogen peroxide in stationary phase,” Nucleic Acids Res., vol. 45, no. 1, pp. 1–14, Jan. 2017.
nonfocal	Bacteria	Mycobacterium smegmatis	J. Amon, “Mining the genomes of actinomycetes : Identification of metabolic pathways and regulatory networks Vergleichende Genomanalyse von Actinomyceten : Identifikation von Stoffwechselwegen und regulatorischen Netzwerken,” Friedrich-Alexander-Universität Erlangen-Nürnberg, 2010.
nonfocal	Bacteria	Mycobacterium smegmatis	X. Li et al., “Transcriptome Landscape of Mycobacterium smegmatis,” Front. Microbiol., vol. 8, no. DEC, pp. 1–16, Dec. 2017.
nonfocal	Bacteria	Mycobacterium smegmatis	N. L. Steyn, “Nucleoid Gene Regulation in Mycobacteria,” Stellenbosch University, 2017.
nonfocal	Bacteria	Mycobacterium smegmatis	A. Kumar and S. Karthikeyan, “Crystal structure of the MSMEG_4306 gene product from Mycobacterium smegmatis,” Acta Crystallogr. Sect. F Struct. Biol. Commun., vol. 74, no. 3, pp. 166–173, Mar. 2018.
nonfocal	Bacteria	Mycobacterium smegmatis	J. L. McKenzie et al., “A VapBC Toxin-Antitoxin Module Is a Posttranscriptional Regulator of Metabolic Flux in Mycobacteria,” J. Bacteriol., vol. 194, no. 9, pp. 2189–2204, May 2012.
nonfocal	Bacteria	Mycobacterium smegmatis	A. E. Minias et al., “RNase HI Is Essential for Survival of Mycobacterium smegmatis,” PLoS One, vol. 10, no. 5, p. e0126260, May 2015.
nonfocal	Bacteria	Mycobacterium tuberculosis	S. Raman, X. Puyang, T.-Y. Cheng, D. C. Young, D. B. Moody, and R. N. Husson, “Mycobacterium tuberculosis SigM Positively Regulates Esx Secreted Protein and Nonribosomal Peptide Synthetase Genes and Down Regulates Virulence-Associated Surface Lipid Synthesis,” J. Bacteriol., vol. 188, no. 24, pp. 8460–8468, Dec. 2006.
nonfocal	Bacteria	Mycobacterium tuberculosis	H. A. Watkins and E. N. Baker, “Cloning, expression, purification and preliminary crystallographic analysis of the RNase HI domain of the Mycobacterium tuberculosis protein Rv2228c as a maltose-binding protein fusion,” Acta Crystallogr. Sect. F Struct. Biol. Cryst. Commun., vol. 64, no. 8, pp. 746–749, Aug. 2008.
nonfocal	Bacteria	Mycobacterium tuberculosis	H. A. Watkins and E. N. Baker, “Structural and Functional Characterization of an RNase HI Domain from the Bifunctional Protein Rv2228c from Mycobacterium tuberculosis,” J. Bacteriol., vol. 192, no. 11, pp. 2878–2886, Jun. 2010.
nonfocal	Bacteria	Mycobacterium tuberculosis	Z. Ditse, M. H. Lamers, and D. F. Warner, “DNA Replication in Mycobacterium tuberculosis,” Microbiol. Spectr., vol. 5, no. 2, Apr. 2017.
nonfocal	Bacteria	Mycobacterium tuberculosis	C. Duncan et al., “Whole transcriptomic and proteomic analyses of an isogenic M. tuberculosis clinical strain with a naturally occurring 15 Kb genomic deletion,” PLoS One, vol. 12, no. 6, p. e0179996, Jun. 2017.
nonfocal	Bacteria	Mycobacterium tuberculosis	L. Danelishvili, M. Wu, L. S. Young, and L. E. Bermudez, “Genomic Approach to Identifying the Putative Target of and Mechanisms of Resistance to Mefloquine in Mycobacteria,” Antimicrob. Agents Chemother., vol. 49, no. 9, pp. 3707–3714, Sep. 2005.
nonfocal	Bacteria	Mycobacterium tuberculosis	Y. Ding, F. Ma, Z. Wang, and B. Li, “Characteristics of the Vδ2 CDR3 Sequence of Peripheral γδ T Cells in Patients with Pulmonary Tuberculosis and Identification of a New Tuberculosis-Related Antigen Peptide,” Clin. Vaccine Immunol., vol. 22, no. 7, pp. 761–768, Jul. 2015.
nonfocal	Bacteria	Mycobacterium tuberculosis	A. Minias, P. Minias, B. Czubat, and J. Dziadek, “Purifying Selective Pressure Suggests the Functionality of a Vitamin B12 Biosynthesis Pathway in a Global Population of Mycobacterium tuberculosis,” Genome Biol. Evol., vol. 10, no. 9, pp. 2326–2337, Sep. 2018.
nonfocal	Bacteria	Mycobacterium tuberculosis	A. J. Martinot, “Microbial Offense vs Host Defense: Who Controls the TB Granuloma?,” Vet. Pathol., vol. 55, no. 1, pp. 14–26, Jan. 2018.
nonfocal	Bacteria	Mycobacterium tuberculosis	M. Sarker et al., “Combining Cheminformatics Methods and Pathway Analysis to Identify Molecules with Whole-Cell Activity Against Mycobacterium Tuberculosis,” Pharm. Res., vol. 29, no. 8, pp. 2115–2127, Aug. 2012.
nonfocal	Bacteria	Mycobacterium tuberculosis	X. Fang, A. Wallqvist, and J. Reifman, “Development and analysis of an in vivo-compatible metabolic network of Mycobacterium tuberculosis,” BMC Syst. Biol., vol. 4, no. 1, p. 160, 2010.
nonfocal	Bacteria	Neisseria gonorrhoeae	L. A. Jackson, J.-C. Pan, M. W. Day, and D. W. Dyer, “Control of RNA Stability by NrrF, an Iron-Regulated Small RNA in Neisseria gonorrhoeae,” J. Bacteriol., vol. 195, no. 22, pp. 5166–5173, Nov. 2013.
nonfocal	Bacteria	Neisseria meningitidis	S. Sainsbury, J. Ren, N. J. Saunders, D. I. Stuart, and R. J. Owens, “Structure of the regulatory domain of the LysR family regulator NMB2055 (MetR-like protein) from Neisseria meningitidis,” Acta Crystallogr. Sect. F Struct. Biol. Cryst. Commun., vol. 68, no. 7, pp. 730–737, Jul. 2012.
nonfocal	Bacteria	Neisseria meningitidis	A. S. Punekar, J. Porter, S. B. Carr, and S. E. V. Phillips, “Structural basis for DNA recognition by the transcription regulator MetR,” Acta Crystallogr. Sect. F Struct. Biol. Commun., vol. 72, no. 6, pp. 417–426, Jun. 2016.
nonfocal	Eukaryota	Neurospora crassa	W. Dong et al., “Systems Biology of the Clock in Neurospora crassa,” PLoS One, vol. 3, no. 8, p. e3105, Aug. 2008.
nonfocal	Bacteria	Photorhabdus luminescens	E. Turlin et al., “Proteome analysis of the phenotypic variation process inPhotorhabdus luminescens,” Proteomics, vol. 6, no. 9, pp. 2705–2725, May 2006.
nonfocal	Bacteria	Photorhabdus luminescens	P. H. Degnan, “Genome sequence of Blochmannia pennsylvanicus indicates parallel evolutionary trends among bacterial mutualists of insects,” Genome Res., vol. 15, no. 8, pp. 1023–1033, Aug. 2005.
nonfocal	Bacteria	Porphyromonas gingivalis	R. M. E. McKenzie et al., “Metabolome variations in the Porphyromonas gingivalis vimA mutant during hydrogen peroxide-induced oxidative stress,” Mol. Oral Microbiol., vol. 30, no. 2, pp. 111–127, Apr. 2015.
nonfocal	Bacteria	Porphyromonas gingivalis	C. D. Schlenker, “The Characterization of PG0228 in Porphyromonas gingivalis W83,” University of Toledo, 2011.
nonfocal	Bacteria	Porphyromonas gingivalis	B. R. Belvin, Q. Gui, J. A. Hutcherson, and J. P. Lewis, “The Porphyromonas gingivalis Hybrid Cluster Protein Hcp Is Required for Growth with Nitrite and Survival with Host Cells,” Infect. Immun., vol. 87, no. 4, Jan. 2019.
nonfocal	Bacteria	Pseudomonas aeruginosa PAO1	A. Rahmani-Badi, S. Sepehr, H. Fallahi, and S. Heidari-Keshel, “Erratum: Exposure of E. coli to DNA-Methylating Agents Impairs Biofilm Formation and Invasion of Eukaryotic Cells via Down Regulation of the N-Acetylneuraminate Lyase NanA,” Front. Microbiol., vol. 7, no. APR, pp. 1–13, Mar. 2016.
nonfocal	Bacteria	Pseudomonas aeruginosa PAO1	M. Starkey et al., “Pseudomonas aeruginosa Rugose Small-Colony Variants Have Adaptations That Likely Promote Persistence in the Cystic Fibrosis Lung,” J. Bacteriol., vol. 191, no. 11, pp. 3492–3503, Jun. 2009.
nonfocal	Bacteria	Pseudomonas aeruginosa PAO1	L. V. Wilkinson, “PEPTIDE 1018 INHIBITS SWARMING MOTILITY AND DYSREGULATES TRANSCRIPTIONAL REGULATORS OF SWARMING IN PSEUDOMONAS AERUGINOSA,” The University of British Columbia, 2018.
nonfocal	Bacteria	Pseudomonas aeruginosa PAO1	W. Gooderham, “Regulation of Virulence and Antimicrobial Peptide Resistance in Pseudomonas Aeruginosa,” The University of British Columbia, 2008.
focal	Bacteria	Pseudomonas sp.	A. Manan, Z. Bazai, J. Fan, H. Yu, and L. Li, “The Nif3-Family Protein YqfO03 from Pseudomonas syringae MB03 Has Multiple Nematicidal Activities against Caenorhabditis elegans and Meloidogyne incognita,” Int. J. Mol. Sci., vol. 19, no. 12, p. 3915, Dec. 2018.
nonfocal	Eukaryota	Rattus norvegicus	Y. Cherkas, M. K. McMillian, D. Amaratunga, N. Raghavan, and J. C. Sasaki, “ABC gene-ranking for prediction of drug-induced cholestasis in rats,” Toxicol. Reports, vol. 3, pp. 252–261, 2016.
nonfocal	Eukaryota	Rattus norvegicus	R. Massart et al., “Role of DNA Methylation in the Nucleus Accumbens in Incubation of Cocaine Craving,” J. Neurosci., vol. 35, no. 21, pp. 8042–8058, May 2015.
nonfocal	Eukaryota	Rhinocladiella mackenziei	L. F. Moreno et al., “Genomic Understanding of an Infectious Brain Disease from the Desert,” Genes|Genomes|Genetics, vol. 8, no. 3, pp. 909–922, Mar. 2018.
nonfocal	Eukaryota	Saccharomyces cerevisiae	J. K. Risler, A. E. Kenny, R. J. Palumbo, E. R. Gamache, and M. J. Curcio, “Host co-factors of the retrovirus-like transposon Ty1,” Mob. DNA, vol. 3, no. 1, p. 12, 2012.
nonfocal	Eukaryota	Saccharomyces cerevisiae	R. Page, W. Peti, I. A. Wilson, R. C. Stevens, and K. Wuthrich, “NMR screening and crystal quality of bacterially expressed prokaryotic and eukaryotic proteins in a structural genomics pipeline,” Proc. Natl. Acad. Sci., vol. 102, no. 6, pp. 1901–1905, Feb. 2005.
nonfocal	Eukaryota	Saccharomyces cerevisiae	J. a Martens, J. Genereaux, C. J. Brandl, and A. Saleh, “Transcriptional Activation by Yeast PDR1p Is Inhibited by Its Association with Transcriptional Activation by Yeast PDR1p Is Inhibited by Its Association with NGG1p/ADA3p *,” J. Biol. Chem., vol. 271, no. 27, pp. 15884–15890, 1996.
nonfocal	Eukaryota	Saccharomyces cerevisiae	Y. Li, K. sum Lam, N. Dasgupta, and P. Ye, “A yeast’s eye view of mammalian reproduction: cross-species gene co-expression in meiotic prophase.,” BMC Syst. Biol., vol. 4, p. 125, 2010.
nonfocal	Eukaryota	Saccharomyces cerevisiae	J. Reinders, R. P. Zahedi, N. Pfanner, C. Meisinger, and A. Sickmann, “Toward the complete yeast mitochondrial proteome: Multidimensional separation techniques for mitochondrial proteomics,” J. Proteome Res., vol. 5, no. 7, pp. 1543–1554, 2006.
nonfocal	Eukaryota	Saccharomyces cerevisiae	S. Ghaemmaghami et al., “Global analysis of protein expression in yeast,” Nature, vol. 425, no. 6959, pp. 737–741, Oct. 2003.
nonfocal	Eukaryota	Saccharomyces cerevisiae	K. L. Ho et al., “A Role for the Budding Yeast Separase, Esp1, in Ty1 Element Retrotransposition,” PLOS Genet., vol. 11, no. 3, p. e1005109, Mar. 2015.
nonfocal	Eukaryota	Saccharomyces cerevisiae	M. Breker, M. Gymrek, O. Moldavski, and M. Schuldiner, “LoQAtE—Localization and Quantitation ATlas of the yeast proteomE. A new tool for multiparametric dissection of single-protein behavior in response to biological perturbations in yeast,” Nucleic Acids Res., vol. 42, no. D1, pp. D726–D730, Jan. 2014.
nonfocal	Eukaryota	Saccharomyces cerevisiae	C. Peng et al., “Proteomics insights into the responses of Saccharomyces cerevisiae during mixed-culture alcoholic fermentation with Lachancea thermotolerans,” FEMS Microbiol. Ecol., vol. 95, no. 9, pp. 1–16, Sep. 2019.
nonfocal	Eukaryota	Saccharomyces cerevisiae	R. Jothi, P. F. Cherukuri, A. Tasneem, and T. M. Przytycka, “Co-evolutionary Analysis of Domains in Interacting Proteins Reveals Insights into Domain–Domain Interactions Mediating Protein–Protein Interactions,” J. Mol. Biol., vol. 362, no. 4, pp. 861–875, Sep. 2006.
nonfocal	Eukaryota	Saccharomyces cerevisiae	J. C. Rosenbaum et al., “Disorder Targets Misorder in Nuclear Quality Control Degradation: A Disordered Ubiquitin Ligase Directly Recognizes Its Misfolded Substrates,” Mol. Cell, vol. 41, no. 1, pp. 93–106, Jan. 2011.
nonfocal	Eukaryota	Saccharomyces cerevisiae	S. A. Nelson and J. A. Cooper, “A Novel Pathway that Coordinates Mitotic Exit with Spindle Position,” Mol. Biol. Cell, vol. 18, no. 9, pp. 3440–3450, Sep. 2007.
nonfocal	Eukaryota	Saccharomyces cerevisiae	G. P. Samper, “The Crabtree effect shapes Saccharomyces cerevisiae lag phase,” Arenburg Doctoral School, 2019.
nonfocal	Eukaryota	Saccharomyces cerevisiae	M. Morgenstern et al., “Definition of a High-Confidence Mitochondrial Proteome at Quantitative Scale,” Cell Rep., vol. 19, no. 13, pp. 2836–2852, Jun. 2017.
focal	Eukaryota	Saccharomyces cerevisiae	S. Karniely, A. Rayzner, E. Sass, and O. Pines, “α-Complementation as a probe for dual localization of mitochondrial proteins,” Exp. Cell Res., vol. 312, no. 19, pp. 3835–3846, Nov. 2006.
nonfocal	Eukaryota	Schistosoma mekongi	O. Phuphisut et al., "Transcriptomic analysis of male and female Schistosoma mekongi adult worms," Parasit. Vectors, vol. 11, no. 1, p. 504, Dec. 2018.
nonfocal	Eukaryota	Schizosaccharomyces pombe	J. Hayles et al., “A genome-wide resource of cell cycle and cell shape genes of fission yeast,” Open Biol., vol. 3, no. 5, p. 130053, May 2013.
nonfocal	Eukaryota	Schizosaccharomyces pombe	O. Dudin, L. Merlini, F. O. Bendezú, R. Groux, V. Vincenzetti, and S. G. Martin, “A systematic screen for morphological abnormalities during fission yeast sexual reproduction identifies a mechanism of actin aster formation for cell fusion,” PLOS Genet., vol. 13, no. 4, p. e1006721, Apr. 2017.
nonfocal	Eukaryota	Schizosaccharomyces pombe	X. Pan et al., “Identification of novel genes involved in DNA damage response by screening a genome-wide Schizosaccharomyces pombe deletion library,” BMC Genomics, vol. 13, no. 662, pp. 1–15, 2012.
nonfocal	Bacteria	Staphylococcus aureus	K. S. Saikatendu, X. Zhang, L. Kinch, M. Leybourne, N. V. Grishin, and H. Zhang, “Structure of a conserved hypothetical protein SA1388 from S. aureus reveals a capped hexameric toroid with two PII domain lids and a dinuclear metal center,” BMC Struct. Biol., vol. 6, pp. 1–11, 2006.
focal	Bacteria	Staphylococcus aureus	B. Bagautdinov, Y. Matsuura, S. Bagautdinova, N. Kunishima, and K. Yutani, “Structure of putative CutA1 from Homo sapiens determined at 2.05 Å resolution,” Acta Crystallogr. Sect. F Struct. Biol. Cryst. Commun., vol. 64, no. 5, pp. 351–357, May 2008.
nonfocal	Bacteria	Staphylococcus aureus	P. M. van Diemen et al., “The S. aureus 4-oxalocrotonate tautomerase SAR1376 enhances immune responses when fused to several antigens,” Sci. Rep., vol. 7, no. 1, p. 1745, Dec. 2017.
nonfocal	Bacteria	Staphylococcus aureus	K. B. Williams, A. Yahshiri, S. J. R. Arends, D. L. Popham, C. A. Fowler, and D. S. Weiss, “NMR solution structure of the peptidoglycan-binding SPOR domain from E. coli DamX: insights into septal localization,” Biochemistry, vol. 52, no. 4, pp. 627–639, 2013.
nonfocal	Bacteria	Staphylococcus aureus	J. R. Conn, E. M. Catchpoole, N. Runnegar, S. J. Mapp, and K. A. Markey, “Low rates of antibiotic resistance and infectious mortality in a cohort of high-risk hematology patients: A single center, retrospective analysis of blood stream infection,” PLoS One, vol. 12, no. 5, p. e0178059, May 2017.
nonfocal	Bacteria	Staphylococcus aureus	P. M. Dunman et al., “Transcription Profiling-Based Identification of Staphylococcus aureus Genes Regulated by the agr and/or sarA Loci,” J. Bacteriol., vol. 183, no. 24, pp. 7341–7353, Dec. 2001.
nonfocal	Bacteria	Staphylococcus aureus	D. Mary Rajathei and S. Selvaraj, “Analysis of sequence repeats of proteins in the PDB,” Comput. Biol. Chem., vol. 47, pp. 156–166, Dec. 2013.
nonfocal	Bacteria	Staphylococcus aureus	N. H. Kwon et al., “Staphylococcal cassette chromosome mec (SCCmec) characterization and molecular analysis for methicillin-resistant Staphylococcus aureus and novel SCCmec subtype IVg isolated from bovine milk in Korea,” J. Antimicrob. Chemother., vol. 56, no. 4, pp. 624–632, Oct. 2005.
nonfocal	Bacteria	Staphylococcus aureus	K. F. Bruce, P. Warrener, J. McLarnan, and K. Hou, “RANDOM TRANSPOSON INSERTION IN STAPHYLOCOCCUSAUREUS AND USE THEREOF TO DENTIFY ESSENTIAL GENES,” US8173363B2, 2012.
nonfocal	Bacteria	Staphylococcus aureus	J. Drummelsmith, E. Winstall, M. G. Bergeron, G. G. Poirier, and M. Ouellette, “Comparative Proteomics Analyses Reveal a Potential Biomarker for the Detection of Vancomycin-Intermediate Staphylococcus aureus Strains,” J. Proteome Res., vol. 6, no. 12, pp. 4690–4702, Dec. 2007.
nonfocal	Bacteria	Streptococcus pneumoniae	H. J. Bootsma, P. J. Burghout, P. W. M. Hermans, J. J. E. Bijlsma, O. P. Kuipers, and T. G. Kloosterman, “Virulence factors of Streptococcus pnuemoniae,” US 2010/0183596 A1, 2010.
nonfocal	Bacteria	Streptococcus pneumoniae	P. W. M. Hermans, H. J. Bootsma, P. J. Burghout, J. J. E. Bijlsma, O. P. Kuipers, and T. G. Kloosterman, “New virulence factors of Streptococcus pneumoniae,” WO 2008/127094 A2, 2008.
nonfocal	Bacteria	Streptococcus pneumoniae	A. B. Dalia, “Characterization of Bacterial Factors that Promote Resistance to Complement-mediated Opsonophagocytic Killing and Lysis,” University of Pennsylvania, 2011.
nonfocal	Bacteria	Streptococcus pneumoniae	L. K. Mahdi, E. Ebrahimie, D. L. Adelson, J. C. Paton, and A. D. Ogunniyi, “A Transcription Factor Contributes to Pathogenesis and Virulence in Streptococcus pneumoniae,” PLoS One, vol. 8, no. 8, p. e70862, Aug. 2013.
nonfocal	Bacteria	Streptococcus pneumoniae	H. M. Ta and K. K. Kim, “Crystal structure of Streptococcus pneumoniae Sp1610, a putative tRNA methyltransferase, in complex with S -adenosyl-L-methionine,” Protein Sci., vol. 19, no. 3, p. NA-NA, 2010.
focal	Bacteria	Streptococcus pneumoniae	K. L. Constantine et al., “Structural and functional characterization of CFE88: Evidence that a conserved and essential bacterial protein is a methyltransferase,” Protein Sci., vol. 14, no. 6, pp. 1472–1484, Jan. 2009.
nonfocal	Bacteria	Streptococcus pyogenes serotype M1	L. Happonen et al., “A quantitative Streptococcus pyogenes–human protein–protein interaction map reveals localization of opsonizing antibodies,” Nat. Commun., vol. 10, no. 1, p. 2727, Dec. 2019.
nonfocal	Bacteria	Streptococcus pyogenes serotype M1	U. Resch et al., “A Two-Component Regulatory System Impacts Extracellular Membrane-Derived Vesicle Production in Group A Streptococcus,” MBio, vol. 7, no. 6, pp. 1–10, Dec. 2016.
nonfocal	Bacteria	Streptococcus pyogenes serotype M1	J. A. Freiberg et al., “Global Analysis and Comparison of the Transcriptomes and Proteomes of Group A Streptococcus Biofilms,” mSystems, vol. 1, no. 6, pp. 1–19, Dec. 2016.
nonfocal	Bacteria	Streptomyces coelicolor	M. Alam, E. Takano, and R. Breitling, “Prioritizing orphan proteins for further study using phylogenomics and gene expression profiles in Streptomyces coelicolor,” BMC Res. Notes, vol. 4, no. 1, p. 325, 2011.
nonfocal	Bacteria	Streptomyces sp. SN-1061M	L. Kaysser, S. Siebenberg, B. Kammerer, and B. Gust, “Analysis of the liposidomycin gene cluster leads to the identification of new caprazamycin derivatives,” ChemBioChem, vol. 11, no. 2, pp. 191–196, 2010.
nonfocal	Bacteria	Sulfobacillus thermosulfidooxidans	A. Hart, M. P. Cortés, M. Latorre, and S. Martinez, “Codon usage bias reveals genomic adaptations to environmental conditions in an acidophilic consortium,” PLoS One, vol. 13, no. 5, p. e0195869, May 2018.
nonfocal	Bacteria	Thermovibrio ammonificans	D. Giovannelli et al., “Insight into the evolution of microbial metabolism from the deep-branching bacterium, Thermovibrio ammonificans,” Elife, vol. 6, no. 848, Apr. 2017.
focal	Bacteria	Thermus thermophilus HB8	F. Tomoike, T. Wakamatsu, N. Nakagawa, S. Kuramitsu, and R. Masui, “Crystal structure of the conserved hypothetical protein TTHA1606 from Thermus thermophilus HB8,” Proteins Struct. Funct. Bioinforma., vol. 76, no. 1, pp. 244–248, Jul. 2009.
nonfocal	Bacteria	Thermus thermophilus HB8	M. W. Van Dyke, M. D. Beyer, E. Clay, K. J. Hiam, J. L. McMurry, and Y. Xie, “Identification of Preferred DNA-Binding Sites for the Thermus thermophilus Transcriptional Regulator SbtR by the Combinatorial Approach REPSA,” PLoS One, vol. 11, no. 7, p. e0159408, Jul. 2016.
nonfocal	Bacteria	Treponema pallidum subsp. pallidum SS14	A. A. T. Naqvi, M. Shahbaaz, F. Ahmad, and M. I. Hassan, “Identification of Functional Candidates amongst Hypothetical Proteins of Treponema pallidum ssp. pallidum,” PLoS One, vol. 10, no. 4, p. e0124177, Apr. 2015.
nonfocal	Bacteria	Tropheryma whipplei str. Twist	N. Crapoulet, P. Barbry, D. Raoult, and P. Renesto, “Global Transcriptome Analysis of Tropheryma whipplei in Response to Temperature Stresses,” J. Bacteriol., vol. 188, no. 14, pp. 5228–5239, Jul. 2006.
nonfocal	Bacteria	Verrucomicrobium sp. strain TAV2	Austin Willis, “Comparing the Genome Expression Profiles of Verrucomicrobium sp. Strain TAV2 Cells Grown Under Two Different Oxygen Concentrations,” The University of Texas at Arlington, 2010.
nonfocal	Bacteria	Vibrio cholerae	K. L. Meibom, X. B. Li, A. T. Nielsen, C.-Y. Wu, S. Roseman, and G. K. Schoolnik, “The Vibrio cholerae chitin utilization program.,” Proc. Natl. Acad. Sci. U. S. A., vol. 101, no. 8, pp. 2524–9, Feb. 2004.
nonfocal	Bacteria	Vibrio cholerae	Y. Fu, M. K. Waldor, and J. J. Mekalanos, “Tn-Seq Analysis of Vibrio cholerae Intestinal Colonization Reveals a Role for T6SS-Mediated Antibacterial Activity in the Host,” Cell Host Microbe, vol. 14, no. 6, pp. 652–663, Dec. 2013.
nonfocal	Bacteria	Vibrio cholerae	J. Huang et al., “Exploration of the effects of a degS mutant on the growth of Vibrio cholerae and the global regulatory function of degS by RNA sequencing,” PeerJ, vol. 2019, no. 10, pp. 1–18, 2019.
nonfocal	Bacteria	Vibrio cholerae	W. Zhao, F. Caro, W. Robins, and J. J. Mekalanos, “Antagonism toward the intestinal microbiota and its effect on Vibrio cholerae virulence,” Science (80-. )., vol. 359, no. 6372, pp. 210–213, Jan. 2018.
nonfocal	Bacteria	Vibrio fischeri	B. W. Jones and M. K. Nishiguchi, “Differentially expressed genes reveal adaptations between free-living and symbiotic niches of Vibrio fischeri in a fully established mutualism,” Can. J. Microbiol., vol. 52, no. 12, pp. 1218–1227, Dec. 2006.
nonfocal	Bacteria	Vibrio fischeri	C. R. DeLoney, T. M. Bartley, and K. L. Visick, “Role for Phosphoglucomutase in Vibrio fischeri-Euprymna scolopes Symbiosis,” J. Bacteriol., vol. 184, no. 18, pp. 5121–5129, Sep. 2002.
nonfocal	Eukaryota	Xiphophorus maculatus	W. T. Boswell et al., “Exposure to 4100 K fluorescent light elicits sex specific transcriptional responses in Xiphophorus maculatus skin,” Comp. Biochem. Physiol. Part C Toxicol. Pharmacol., vol. 208, no. 3, pp. 96–104, Jun. 2018.
focal	Bacteria, Eukaryota	several organisms (model)	Qijing, G., & Zhang, Y. (2007). NIF3 类超家族蛋白. Chinese Journal of Cell Biology, 29, 816–820. Retrieved from http://www.cjcb.org/news/upload/20141028-200706007.pdf
nonfocal	Eukaryota	NA	Liu, Z., Tang, B., Yan, X., & Guo, J. (2013). Expression profiles of genes in wild-type DJ-1 and L10P mutant DJ-1 in monoclonal cell strains. Chinese Journal of Contemporary Neurology & Neurosurgery, 13(7). https://doi.org/10.3969/j.issn.1672-6731.2013.07.007

## Sheet: b
Focal/Non-focal	Superkingdom	System_specific	Full Reference
non-focal	Eukaryota	Homo sapiens	He, T.-S.; Xie, T.; Li, J.; Yang, Y.-X.; Li, C.; Wang, W.; Cao, L.; Rao, H.; Ju, C.; Xu, L.-G. THO Complex Subunit 7 Homolog Negatively Regulates Cellular Antiviral Response against RNA Viruses by Targeting TBK1. Viruses 2019, 11, 158, doi:10.3390/v11020158.
non-focal	Eukaryota	Homo sapiens	Cury, S.S.; Lapa, R.M.L.; de Mello, J.B.H.; Marchi, F.A.; Domingues, M.A.C.; Pinto, C.A.L.; Carvalho, R.F.; de Carvalho, G.B.; Kowalski, L.P.; Rogatto, S.R. Increased DSG2 plasmatic levels identified by transcriptomic-based secretome analysis is a potential prognostic biomarker in laryngeal carcinoma. Oral Oncol. 2020, 103, 104592, doi:10.1016/j.oraloncology.2020.104592.
non-focal	Eukaryota	Homo sapiens	Schneeweiss, A.; Hartkopf, A.D.; Müller, V.; Wöckel, A.; Lux, M.P.; Janni, W.; Ettl, J.; Belleville, E.; Huober, J.; Thill, M.; et al. Update Breast Cancer 2020 Part 1 – Early Breast Cancer: Consolidation of Knowledge About Known Therapies. Geburtshilfe Frauenheilkd. 2020, 80, 277–287, doi:10.1055/a-1111-2431.
non-focal	Eukaryota	Xenopus allofraseri	Valérie Ducret, Adam Richards, Mathieu Videlier, Thibault Scalvenzi, Karen Moore, et al.. Transcriptomic analysis of the trade-off between endurance and burst-performance in the frog Xenopus allofraseri. 2021. ffhal-03104307f
non-focal	Eukaryota	Homo sapiens	Lv, L.; Zhang, D.; Hua, P.; Yang, S. The glial-specific hypermethylated 3′ untranslated region of histone deacetylase 1 may modulates several signal pathways in Alzheimer’s disease. Life Sci. 2021, 265, 118760, doi:10.1016/j.lfs.2020.118760.
non-focal	Eukaryota	Homo sapiens	Lin, H. Identification of Potential coregenes in Sevoflurance induced Myocardial Energy Metabolismin Patients Undergoing Off-pump Coronary Artery Bypass Graft Surgery using Bioinformatics analysis. Res. Sq. 2019, 1–16, doi:10.21203/rs.2.17434/v1.
non-focal	Eukaryota	Meleagris gallopavo	Strillacci, M.G.; Marelli, S.P.; Martinez-Velazquez, G. Hybrid Versus Autochthonous Turkey Populations: Homozygous Genomic Regions Occurrences Due to Artificial and Natural Selection. Animals 2020, 10, 1318, doi:10.3390/ani10081318.
non-focal	Eukaryota	Bos indicus, Bos taurus	Zheng, X.-D.; Cheng, J.; Qin, W.-J.; Balsai, N.; Shang, X.-J.; Zhang, M.-T.; Chen, H.-Q. Whole Transcriptome Analysis Identifies the Taxonomic Status of a New Chinese Native Cattle Breed and Reveals Genes Related to Body Size. Front. Genet. 2020, 11, 1–11, doi:10.3389/fgene.2020.562855.
non-focal	Eukaryota	Mus musculus (humanized)	Zamanian-Daryoush, M.; Lindner, D.J.; Buffa, J.; Gopalan, B.; Na, J.; Hazen, S.L.; DiDonato, J.A. Apolipoprotein A-I anti-tumor activity targets cancer cell metabolism. Oncotarget 2020, 11, 1777–1796, doi:10.18632/oncotarget.27590.
non-focal	Eukaryota	Homo sapiens	Qu, S.; Shi, Q.; Xu, J.; Yi, W.; Fan, H. Weighted Gene Coexpression Network Analysis Reveals the Dynamic Transcriptome Regulation and Prognostic Biomarkers of Hepatocellular Carcinoma. Evol. Bioinforma. 2020, 16, 117693432092056, doi:10.1177/1176934320920562.
non-focal	Eukaryota	Rattus norvegicus	Malan-Müller, S.; de Souza, V.B.C.; Daniels, W.M.U.; Seedat, S.; Robinson, M.D.; Hemmings, S.M.J. Shedding Light on the Transcriptomic Dark Matter in Biological Psychiatry: Role of Long Noncoding RNAs in D-cycloserine-Induced Fear Extinction in Posttraumatic Stress Disorder. Omi. A J. Integr. Biol. 2020, 24, 352–369, doi:10.1089/omi.2020.0031.
non-focal	Eukaryota	Mus musculus	McBrearty, N. SHORT CHAIN FATTY ACIDS (SCFAS) DELAY THE PATHOGENESIS OF HEPATITIS B VIRUS (HBV)-ASSOCIATED HEPATOCELLULAR CARCINOMA (HCC), Temple University, 2019.
non-focal	Eukaryota	Mus musculus	Hladik; Buratovic; Toerne; Azimzadeh; Subedi; Philipp; Winkler; Feuchtinger; Samson; Hauck; et al. Combined Treatment with Low-Dose Ionizing Radiation and Ketamine Induces Adverse Changes in CA1 Neuronal Structure in Male Murine Hippocampi. Int. J. Mol. Sci. 2019, 20, 6103, doi:10.3390/ijms20236103.
non-focal	Eukaryota	Homo sapiens	Wu, J.; Liu, S.; Xiang, Y.; Qu, X.; Xie, Y.; Zhang, X. Bioinformatic Analysis of Circular RNA-Associated ceRNA Network Associated with Hepatocellular Carcinoma. Biomed Res. Int. 2019, 2019, 1–14, doi:10.1155/2019/8308694.
non-focal	Eukaryota	Homo sapiens	Fukushima, K.; Tsujino, K.; Futami, S.; Kida, H. Natural Autoantibodies in Chronic Pulmonary Diseases. Int. J. Mol. Sci. 2020, 21, 1138, doi:10.3390/ijms21031138.
non-focal	Eukaryota	Homo sapiens	Codrich, M.; Comelli, M.; Malfatti, M.C.; Mio, C.; Ayyildiz, D.; Zhang, C.; Kelley, M.R.; Terrosu, G.; Pucillo, C.E.M.; Tell, G. Inhibition of APE1-endonuclease activity affects cell metabolism in colon cancer cells via a p53-dependent pathway. DNA Repair (Amst). 2019, 82, 102675, doi:10.1016/j.dnarep.2019.102675.
non-focal	Eukaryota	Mus musculus	Stern, C.; Schreier, B.; Nolze, A.; Rabe, S.; Mildenberger, S.; Gekle, M. Knockout of vascular smooth muscle EGF receptor in a mouse model prevents obesity-induced vascular dysfunction and renal damage in vivo. Diabetologia 2020, 63, 2218–2234, doi:10.1007/s00125-020-05187-4.
non-focal	Eukaryota	Drosophila melanogaster	Fontes, A.A. Mitochondrial and cell cycle functions of SLIMP, Universitat de Barcelona, 2018.
non-focal	Eukaryota	Homo sapiens	Yan, W.; Peng, Y.-R.; Zyl, T. van; Regev, A.; Shekhar, K.; Juric, D.; Sanes, J.R. Cell Atlas of the Human Fovea and Peripheral Retina. bioRxiv 2020.
non-focal	Eukaryota	Homo sapiens	Chapman, A.R.; Lee, D.F.; Cai, W.; Ma, W.; Li, X.; Sun, W.; Sunney Xie, X. Correlated gene modules uncovered by single-cell transcriptomics with high detectability and accuracy. bioRxiv 2020, 14–17, doi:10.1101/2019.12.31.892190.
non-focal	Eukaryota	Homo sapiens	Dapas, M. Investigation of the Genetic Architecture of Polycystic Ovary Syndrome, Northwestern University, 2019.
non-focal	Eukaryota	Homo sapiens	Wang, J.C.; Ramaswami, G.; Geschwind, D.H. Gene co-expression network analysis in human spinal cord highlights mechanisms underlying amyotrophic lateral sclerosis susceptibility. bioRxiv 2020.
non-focal	Eukaryota	Homo sapiens	Jostes, S.V. The bromodomain inhibitor JQ1 as novel therapeutic option for type II testicular germ cell tumours: The role of SOX2 and SOX17 in regulating germ cell tumour pluripotency, Rheinischen Friedrich-Wilhelms-Universität, 2019.
non-focal	Eukaryota	Homo sapiens	Chekouo, T.; Safo, S.E. Bayesian Integrative Analysis and Prediction with Application to Atherosclerosis Cardiovascular Disease. arXiv 2020, 1–48.
non-focal	Eukaryota	Gallus gallus	Alqazlan, N. Immune responses in the gastrointestinal tract of chickens infected with low pathogenic influenza virus subtype H9N2 and the role of probiotic lactobacilli in antiviral immunity and vaccine immunogenicity, The University of Guelph, 2020.
non-focal	Bacteria	Parabacteroides sp. CT06	Wang, C.; Song, Y.; Tang, N.; Zhang, G.; Leclercq, S.O.; Feng, J. The Shared Resistome of Human and Pig Microbiota Is Mobilized by Distinct Genetic Elements. Appl. Environ. Microbiol. 2020, 87, doi:10.1128/AEM.01910-20.
non-focal	Archaea	Methanothermobacter marburgensis	Kerns, S.A. Anthracene-Scaffolded Model Complexes of [Fe]-Hydrogenase (Hmd) for Improved Functional Reactivity and Mechanistic Investigations of Biomimetic H2 Activation and Hydride Transfer, The University of Texas at Austin, 2020.
non-focal	Eukaryota	Saccharomyces cerevisiae	Shakya, V.; Barbeau, W.; Xiao, T.; Knutson, C.; Hughes, A. The nucleus is a quality control center for non-imported mitochondrial proteins. bioRxiv 2020, doi:10.1101/2020.06.26.173781.
non-focal	Bacteria	Lactococcus piscium	Pulido, A.A. Transcriptomic analysis of the response of the lactic acid bacteria Lactococcus piscium for the identification of possible adaptive genes during thermal shock in cold and warm temperatures, University of Helsinki, 2020.
non-focal	Eukaryota	Homo sapiens	Lee, H.Y. Combined Proteomics and Metabolomics Study Reveals the TNF-α Regulated Metabolic Reprogramming of Estrogen Receptor/Progesterone Receptor Positive and Triple Negative Breast Cancer Cells, Seoul National University, 2018.
non-focal	Bacteria	Lactobacillus delbrueckii	Cornacchione, L. Mechanisms for pigmentation of Porphyromonas gingivalis and growth inhibition by yogurt-derived Lactobacillus delbrueckii, Tufts University, 2019.
non-focal	Bacteria	Staphylococcus aureus	Bleichert, P.; Bütof, L.; Rückert, C.; Herzberg, M.; Francisco, R.; Morais, P. V.; Grass, G.; Kalinowski, J.; Nies, D.H. Mutant Strains of Escherichia coli and Methicillin-Resistant Staphylococcus aureus Obtained by Laboratory Selection To Survive on Metallic Copper Surfaces. Appl. Environ. Microbiol. 2020, 87, 1–21, doi:10.1128/AEM.01788-20.
non-focal	Bacteria	Corynebacterium pseudotuberculosis biovar ovis	Araújo, C.L.; Blanco, I.; Souza, L.; Tiwari, S.; Pereira, L.C.; Ghosh, P.; Azevedo, V.; Silva, A.; Folador, A. In silico functional prediction of hypothetical proteins from the core genome of Corynebacterium pseudotuberculosis biovar ovis. PeerJ 2020, 8, e9643, doi:10.7717/peerj.9643.
non-focal	Bacteria	Escherichia coli	Stenger, K.S. Identification of the response pathways of Escherichia coli and Enterococcus faecalis to glyphosate and it ’ s major breakdown product Aminomethyl phosphonic acid ( AMPA ) KS Stenger Supervisor :, North-West University, 2019.
non-focal	Bacteria	Mycoplasma mycoides JCVI-Syn3B	Hossain, T.; Deter, H.S.; Butzin, N.C. Antibiotic tolerance , persistence, and resistance of the evolved minimal cell, Mycoplasma mycoides JCVI-Syn3B. bioRxiv 2020, 1–18, doi:10.1101/2020.06.02.130641.
non-focal	Bacteria	Pseudomonas syringae	Bashir, A.; Tian, T.; Yu, X.; Meng, C.; Ali, M.; Li, L. Pyoverdine-Mediated Killing of Caenorhabditis elegans by Pseudomonas syringae MB03 and the Role of Iron in Its Pathogenicity. Int. J. Mol. Sci. 2020, 21, 2198, doi:10.3390/ijms21062198.
non-focal	Bacteria	Tenacibaculum sp.	Nowlan, J.P. QUANTITATIVE PCR DETECTION OF TENACIBACULUM MARITIMUM AND TENACIBACULUM DICENTRARCHI AT NETPEN SITES IN BRITISH COLUMBIA (CANADA), The University of Guelph, 2020.
non-focal	Bacteria	Tenacibaculum sp.	Nowlan, J.P.; Lumsden, J.S.; Russell, S. Advancements in Characterizing Tenacibaculum Infections in Canada. Pathogens 2020, 9, 1029, doi:10.3390/pathogens9121029.
non-focal	Bacteria	Tenacibaculum maritimum	Brosnahan, C.L.; Munday, J.S.; Ha, H.J.; Preece, M.; Jones, J.B. New Zealand rickettsia- like organism (NZ- RLO) and Tenacibaculum maritimum: Distribution and phylogeny in farmed Chinook salmon (Oncorhynchus tshawytscha). J. Fish Dis. 2019, 42, 85–95, doi:10.1111/jfd.12909.
non-focal	Bacteria	Leishmania mexicana	Damianou, A.; Burge, R.J.; Catta-Preta, C.M.C.; Geoghegan, V.; Nievas, Y.R.; Newling, K.; Brown, E.; Burchmore, R.; Rodenko, B.; Mottram, J.C. Essential roles for deubiquitination in Leishmania life cycle progression. PLOS Pathog. 2020, 16, e1008455, doi:10.1371/journal.ppat.1008455.
non-focal	Eukaryota	Reticulitermes flavipes	Harrison, M.C.; Chernyshova, A.M.; Thompson, G.J. No obvious transcriptome‐wide signature of indirect selection in termites. J. Evol. Biol. 2020, jeb.13749, doi:10.1111/jeb.13749.
focal	Eukaryota	Homo sapiens	Malik, A.; Pande, K.; Kumar, A.; Vemula, A.; Chandramohan, M.R.V. Finding Pathogenic nsSNP’s and their structural effect on COPS2 using Molecular Dynamic Approach. bioRxiv 2020, doi:10.1101/2020.10.12.333252.
non-focal	Eukaryota	Homo sapiens, Mus musculus	Chiesa, R.; Sallese, M. Review: Protein misfolding diseases – the rare case of Marinesco‐Sjögren syndrome. Neuropathol. Appl. Neurobiol. 2020, 46, 323–343, doi:10.1111/nan.12588.
non-focal	Bacteria	Spirosoma radiotolerans DG5A	Munoz, R.; Teeling, H.; Amann, R.; Rosselló-Móra, R. Ancestry and adaptive radiation of Bacteroidetes as assessed by comparative genomics. Syst. Appl. Microbiol. 2020, 43, doi:10.1016/j.syapm.2020.126065.
non-focal	Bacteria	Pseudomonas stutzeri ATCC 17588	Meshram Y; Gore D Deciphering the enzyme coding ability in Pseudomonas stutzeri ATCC17588 hypothetical proteins by Bioinformatics approach. J. Pharm. Res. 2019, 13, 30–35.
non-focal	Bacteria	Escherichia coli	Selim, K.A.; Tremiño, L.; Marco‐Marín, C.; Alva, V.; Espinosa, J.; Contreras, A.; Hartmann, M.D.; Forchhammer, K.; Rubio, V. Functional and structural characterization of PII‐like protein CutA does not support involvement in heavy metal tolerance and hints at a small‐molecule carrying/signaling role. FEBS J. 2020, febs.15464, doi:10.1111/febs.15464.
non-focal	Bacteria	Sinomonas sp.	Prahlad, J.; Yuan, Y.; Lin, J.; Chang, C.-W.; Iwata-Reuyl, D.; Liu, Y.; de Crécy-Lagard, V.; Wilson, M.A. The DUF328 family member YaaA is a DNA-binding protein with a novel fold. J. Biol. Chem. 2020, 295, 14236–14247, doi:10.1074/jbc.RA120.015055.
non-focal	Bacteria	Tenacibaculum maritimum	Brosnahan, C. Diagnostic investigation into summer mortality events of farmed Chinook salmon (Oncorhynchus tshawytscha) in New Zealand, Massey University, Manawatū, University of New Zealand, 2020.
non-focal	Eukaryota	Phoca largha	Tian, J.; Du, J.; Han, J.; Bao, X.; Song, X.; Lu, Z. Proteomics reveals the preliminary physiological states of the spotted seal (Phoca largha) pups. Sci. Rep. 2020, 10, 18727, doi:10.1038/s41598-020-75759-2.
non-focal	Bacteria	NA	Avican, K.; Aldahdooh, J.; Togninalli, M.; Tang, J.; Borgwardt, K.; Rhen, M.; Fällman, M. RNA Atlas of Human Bacterial Pathogens Uncovers Stress Dynamics Linked to Infection. bioRxiv 2020, doi:10.1101/2020.06.29.177147.
non-focal	Eukaryota	Bos grunniens (Bos taurus homolog)	LONG, L.; ZHU, Y.; LI, Z.; ZHANG, H.; LIU, L.; BAI, J. Differential expression of skeletal muscle mitochondrial proteins in yak, dzo, and cattle: a proteomics-based study. J. Vet. Med. Sci. 2020, 82, 1178–1186, doi:10.1292/jvms.19-0218.
