# Supplementary material for: Comparative Genomic Analysis of the DUF34 Protein Family Suggests Role as a Metal Ion Chaperone or Insertase
Source: Preprints.org preprint supplement (doi:10.20944/preprints202107.0280.v1), 2021-07-13
Supplement: Supplementary file 6 [file Data Table 3.xlsx]

## Sheet: Contents
Data Table 3		Reed et al., 2021
Model organism sequences used in initial sequence alignments across and for each superkingdom; exported from OrthoInspector
a	Exported with query of NIF3L_HUMAN (Q9GZT8)
b	Exported with query of GCH1L_METJA (Q58337)
c	Exported with query of GCH1L_ECOLI (P0AFP6)

## Sheet: a
>A0A015KJ89_9GLOM A0A015KJ89 GN=RirG_112510 Nif3p Species=Rhizophagus irregularis DAOM 197198w
MAFFTRVIRAMEKISPISLAEHSWDNVGKLIEPPYPRHFPSRVLLTIDLTPLVLEEALAD
KQIGVIIAYHPPIFRPIKRLNLDNAKQAIVLKCVAQGIGVFSPHTASDSCVGGVNDWLAK
GLGAGTIKPIAPAQNPPEGLFHFPILFCNNKIQIYDQLGHEEAGTGRMFTLDQPAPLSTI
IERVKQHLKLRYVRVATTNKHSSGELISTIGICAGSGSSVLLPATADLYFTGEMSHHDIL
AALDKNTSVILCEHSNTERGYLSEVLKPKLEQLLKEGKEEKIDVVVSKVDKDPLETV
>A0A058ZG94_9EUKA A0A058ZG94 GN=H696_00077 Uncharacterized protein Species=Fonticula alba
MSTLAKPSLLKRVVSILERHAPLAFAGSWDNVGLIIEAPHETLDFLPPRPVSANATHECI
LLTNDLTLPVVREAAALGASVIVAYHPALFGKTRRLTTQDDRQRIALTCAALGISVYCPH
TAWDSCEGGINDWLASIVGRASSQPTSVRPISQFTGAAAAAALEAGQPNAGEGRIVTFAE
PVALSSIADALKAGLKLEYLRCVLPDQATPVAAGQQTVSQLAICAGSGASVLAAAGPGVD
GWLTGEMGHHEALSAAARGVSVLLCEHSNSERGYLTDVMQPLLKEKLQSDQVSVVVSQVD
RDPIQLL
>A0A066VYE2_9BASI A0A066VYE2 GN=K437DRAFT_257458 NGG1p interacting factor 3 Species=Tilletiaria anomala UBC 951
MASLLSGIYKGGDSEATPRIPPPPGACSPSGDGGRGSGGGVGNASSTSTATFSAAMESGG
PPIPTPLKAVSYAMSKIAPLSLADTTWDNVGVLLEAPFPRRSKGVFLAIDLTPAVADELL
SDANSSISVAIIYHPCIFKPLKALSWSASSDGANSMLIHSLLRLSAAGISIYTPHSALDS
APNGMNDWLAFVVSSDVAFQAAGLAALGGGWAPIQKTKVSQYIEKAGLGRLVSLKESRTI
EQIVSRIKKHLRLKYVLVAQAQPPDHQIETIAVQVGSGGSVLQGVYADLYVTGEMSHHEL
LAANSRGISVILLHHSNSERGYLQDVLVHLLHIFLGEEYGIRVSARDHEPLSVM
>A0A067R4D1_ZOONE A0A067R4D1 GN=L798_07717 NIF3-like protein 1 Species=Zootermopsis nevadensis
MGKLELIQTLLGHEGRVWDVCWHPQGNTLASCGEDKTIRIWGREGSKWANKTILADGHQR
TIREVAWSPCGNYLASASFDATTAVWDKKSGQFECNATLEGHENEVKSVAWAKSGHLLAT
CSRDKSVWVWEVADDDECCDRVQRTSVTIESLNWQMILSFLSGNKLQQTCSVPLKCLINA
WYNKYNCSYPCRNIQNSKALKFVTNQLPKDNQKLDFYVTREYSVMANADSYGLSLNDVIA
KLDNFAPKSLAESWDNVGLLVEPVTKKNVRKILLTNDLTEDVMEEAVNLCTDLIISYHPP
IFALLKSITGRTWKERIIATCLENRIAVYSPHTSFDAVSGGVNDWLANGFETESVRPLIQ
SDSADIGSKLYQVEITGFTESALDQIKKDVERNTRGAQEELVGDVSVSCGEMKLTISCSK
SSVPLLAXXXXXXXXXEHFRVLKYEGVSPRGAGMGRLCYLKIPLPVMTVVELVKKRLNLL
KIRLALARHKHMESPVSTVALCAGSGSSVLRGAKADLYLTGEMQHHDILDAVHRGTHVIL
CDHSNTERGFLKVFAEKLSMDLSGGNVEVVVSQIDRDPLQVI
>A0A068X2M2_HYMMI A0A068X2M2 GN=HmN_000685000 Nif3 protein 1 Species=Hymenolepis microstoma
MEFAKFVKRLDHIFKISLAESWDNVGLLIHPSSATTIKRIFLTNDLTEPVLNEAISNGAD
FIISYHPPIFRSFKRLTQNSAKERIVLKCIENKIAVYSPHTALDAVAGGLNDWLLSPFDL
KHKKPLNGTKLSRYPPTVTSLNNRTLQEYCIENNVAPLNSDIPSLDGQMSEVTVTGDAPK
CLDMNLGDSVIFSPEEGAGRIALLNEGHTINDVVESFKKLLDTSLLKVALGYGKTFDSPV
SALAVCAGSGGSMFTSEPMAQVADLLFTGEASYHDQLDTISRGNTIITAGHSVSERGYLT
QRLKPWLEKEIAVLTDAQILIDISSKDSEPGIYVC
>A0A074Z0B8_9PEZI A0A074Z0B8 GN=AUEXF2481DRAFT_1300 Uncharacterized protein Species=Aureobasidium subglaciale EXF-2481
MSSTVSSAPFSKAVVGAMRKLYPEALADKAWDNTGLLLESPFDPIRRQMNSALLTIDLTK
AVADEAIERGDSVIVAYHPIIFRGLKSLSLADTQQQTLLRLAAEGISVYSPHTAIDCAPG
GLGDWLADIVSGTPMSAEELAAQAEEKQKEQAKEPETPSQGLKRPTAQLQHHPSQLSIKD
RTLKLGNDTHTRRPITPCKAPGYENTTAGMGRIVRFNTPQPLLEIIDRIGRGLGNPKGFP
IAIPQGKTMEEIDISSVAICAGSGGSLFSGLGKNGEEDVDLLFTGELSHHEALAAIEQGK
CVIALFHSNTERGFLHGVLKPQLENAVKEEWERVRQEEKNKAGLSEDYLEALEDDHVEIH
VSEVDRDPYGIMISKDEI
>A0A075B1Y9_9FUNG A0A075B1Y9 GN=O9G_001534 Ngg1p interacting factor 3, NIF3 domain-containing protein Species=Rozella allomycis CSF55
MNENHEYYPGMLTQMASQVDPHEDPFTKLAYQLAQQDLNKENRASSNRRPLSPLNNTSSS
AYVLKIDNSKIRREKNYNSPVGTPFRDLKKIDRLENRKTPEKSTAKSNPVNESYYGTPKM
GRIESVEKITPSPLSSSSKSKSDLLFEVVTPSIEKLRQDRLKTPSPTPSSSSKQSSSTSF
SLGKNKSSKPDFVTSFAVISPSEKTRSGLSLKTSKGTLEIASIMELEKKDLRMIKALEKI
KLEKKQQEEQKAKKNRYSHIQSRYKNILNTQNAKTKKENADNTLKTILDKRQSIPDLLES
SETNKKLAEIEGKLYENQISKDAWINLKMAEYEKELSNLSLSIMQPRLKKLVESLNKIAP
ISLADLSWDNVGLLIESPVLVNTGVSKVLVTNDLTLEVCQEAIRKTANFIVTYHPVIFSP
MKRIVLGHSACQTITSLCLANNISVFSPHTSLDSVKHGVNDWLIQSALSEDPVLVKPIVP
NSENVNQGMGRIAHLHTPQKIKDILQRLKLAVGVKHLRVSVSKNHQIEDEIINGIAVCAG
SGGSLFKKIEDGDLEKVDLLITGEMSHHDILSWRFKGKSVILCEHSNSERGFLKNVYAKR
IQELLPSDEFTVEYSEDDHEPIQII
>A0A0A1NYT8_9FUNG A0A0A1NYT8 GN=RMCBS344292_18563 Uncharacterized protein Species=Rhizopus microsporus
MSLLSKVTRCMRAIAPLELAETSWDNVGVLVEPPFPSPKQNKVLLTIDLTPQVLEEALAD
PKFGTIVSYHPPIFRGFKRLTSEDPQQAMILKAIASGVGIYSPHTACDNCINGVNDWLAS
GLGKGRVEPITPVDNPPEGQEGSGSGRLFTFSEPTSLSEIVDRVKKLIGLPYD
>A0A0A1PIY1_9FUNG A0A0A1PIY1 GN=RMCBS344292_18995 Uncharacterized protein Species=Rhizopus microsporus
MSLLSKVTRCMRAIAPLELAETSWDNVGVLVEPPFPSPKQNKVLLTIDLTPQVLEEALAD
PKFGTIVSYHPPIFRGFKRLTSDDPQQAMILKAIASGVGIYSPHTACDNCINGVNDWLAS
GLGKGRVEPITPADNPPEGQEGSGSGRLFTFSEPTSLSEIVDRVKKLIGLPYGNEQGYV
>A0A0D1CU19_USTMA A0A0D1CU19 GN=UMAG_10165 Chromosome 5, whole genome shotgun sequence Species=Ustilago maydis (strain 521 / FGSC 9021)
MSLPNWEITDSVKQNRILADVMRAMHRIAPLQLADTSFDNVGLLLQAPASTTSQSSEQQS
VMLAIDLTTDVCNEILSSSANVKVALVYHPIIFRGLKSFTLADPQQTSLLRLAAAGVSVY
CPHTSLDATPGGINDWLGKVVTSRSAFPELKSAESVNDFRSNPYPALSMSKNPPKGYEAA
GLGRLVQIDPPQPFEEIVRRVKQNLNLDHVQGCKASDKPISTVAVCAGSGSSVFSGVKAD
LYLTGELSHHEILAYQAAGASVIVTNHTNTERKYLRDVLQHSLQEELSGKYTVLVSQNDR
DPLRVL
>A0A0D1ZNC5_9EURO A0A0D1ZNC5 GN=PV10_00026 YbgI/family dinuclear metal center protein Species=Exophiala mesophila
MLRPSLSRIISSLYSSSPKFHLRLAPPFSHSRVQPSTSLPSLPLRRNMNFQSRSYPYPVS
PFTRTVISCMRQLYPDCLADKSFDNTGLLVEAPLLPTHNSRPRNTNKVLLTIDLTRAVAT
EAIDHNVSLVVSYHPIIFRGLKSITTNDTQQLTISLLLAHGISVYCPHTAVDTVPGGMAD
WLCDVVTGRVDDPESEAFTAQTPSDTEISSDTEVTTSDSDHGYDEGDTLSDASTKPTSHS
DAVSDPYVSSPGPQSPNTPKAKSMRPQTTRRTYSKPTYPRPTSHFHPAVISHTRSVVNPS
PHDAIEAANELTRSTKYDSSNTGAGRLISFDAAQSLTLLITRIAHAIGLPKGFSMAIPQG
VRIEDIQIKTVATCPGSGGSVLSKCRADLILTGELSHHETLAVTERGGCVISLFHSNSER
GYLWSVMRDQLERRARIEWTKLQGENLSNQNLSEPERAILCNHQLVEVLVSEWDRDPYGI
VVLDDTPVPGVKLESA
>A0A0D2WU71_CAPO3 A0A0D2WU71 GN=CAOG_005867 NIF3-like protein 1 Species=Capsaspora owczarzaki (strain ATCC 30864)
MELSKVLQTLKTFAPLRLAESWDNVGLLVEPVTKRRPIDKILLTIDLTERVVDEAAQHSI
PLIIAYHPPIFAALKKLTAGATKERIAVKAIEHGIAIYSPHTSYDSVQGGINDWLASGLG
EASAISVLQPHTFHHDGDSQTSSGTHRASVYGLAGQLAELRTAIASILGSESSFATFSSN
DSASRSKLEFKCQQSHLGSLAALLAKHAGNGVTWETHSLEKLPQPGTGQGRLVTLAQPTP
LPQLLTKIKAHLQVEHVRIALPSAAVPAAQVPPKTQAAALEHAKNVLVQKIALCAGSGSS
VMRGVRADVYLTGEMGHHDVLDAVSSGAAVVLCEHTNTERGYLAKLRESLAELFGTAGVQ
VTVSQQDADPLVIV
>A0A0E9NEH0_9ASCO A0A0E9NEH0 GN=G7K_2388-t1 Uncharacterized protein Species=Saitoella complicata NRRL Y-17804
MASTPAILPKVLRAVQKLYPIALADKTWDNTGLLLEAPISHKPCANGVSRVLLTIDLTTA
VAEEALKEGSGVSVIVAYHPIIFRGLKSLTMKDTQQRSLLRLAAAGISVYAPHTAVDAAV
GGVNDWLADGVSGGREHEEKREVLQNGTKVEGHEDGGMGRLVELKEPLELTELVKRVKKL
TGLKYVQVARPRSLEKVKTIAICAGSGGSLFRGVQADCFFTGELGHHETLATIENGMSAI
ICGHTNTERGFLAAVMQPRLEELLKVEEEKIEVVVSEDDRDPVEIM
>A0A0E9NSW1_9ASCO A0A0E9NSW1 GN=G7K_6834-t1 Uncharacterized protein Species=Saitoella complicata NRRL Y-17804
MLNCEVRNDKDGRTMLPGLKNLFNWSMGCMLFTPVTDMRDSYAPSLPPYNDVNRVPSKQM
ASAPAILPKVLKTVQKLYPVALADKTWDNTGLLLEAPIPHRPAANGVSRVLLTIDLTTAV
AEEALREGSGVAVIVAYHPIIFRGLKSLTMKDTQQRSLLRLAAAGISIYAPHTAVDAAVG
GVNDWLADGVSGGKEHEEKREVLQNGTKVEGHEDGGMGRLVELKEPLELIELVKRVKKLT
GLKYVQVARPQLLEKVKTIAICAGSGGSLFRGVQADCFFTGELGHHETLATVENGMSAII
CGHTNTERGFLAAVMKPRLEELLKEEEEKIEVVVSEGDRDPVEIM
>A0A0L0HSC6_SPIPN A0A0L0HSC6 GN=SPPG_01475 YbgI/family dinuclear metal center protein Species=Spizellomyces punctatus DAOM BR117
MGERHHTFYFLISTGKTIDMTLLQHVTRCMEKIAPLKLAETAWDNVGVLVEAPFPRTNAT
RIFLTIDLRQHVLEEALKDPKIGVIVAYHPPIFKAVKRLCMNDDKQSIALKCAASGVSIF
SPHTALDNCIGGINDWLARGLGVGQTTVINAIKDPPADQLGSGSGRIHLLEKPVDIHEMV
RRVKSHLKLAHVRLATPTQNKPITSIAICAGSGASVLMNTKADLYLTGEMSHHEVLAALA
DDISVILCEHTNTERGYLAEVLQPRLQTLLRETEPATEVVVSSIDRDPLVVV
>A0A0L0SNH1_ALLMA A0A0L0SNH1 GN=AMAG_09094 YbgI/family dinuclear metal center protein Species=Allomyces macrogynus ATCC 38327
MALLRQVQSAFHKFAPLHLAETAWDNVGVLVEAPYPRQEADTVFLTIDLTPQVLEEALQL
GNVGVIVAYHPTIFRGWKRLNLATDGDAESVKQEVIMKLIARGISLYCPHTSLDAAQGGI
NDWLAKGLEPFGIKSTAPITPSNAANPGPEGSGRIVELMSPQSLPDVVAAIKKHLNLPFV
RVATAPRNHKISSIAMCAGSGASVFSRATTRPDLLWTGEMGHHEVLAAVQTGSHVVLCEH
TNTERGYLSAVLKPRLERDAGLKVVVSAVDRDPLVVQ
>A0A0L0SYM5_ALLMA A0A0L0SYM5 GN=AMAG_11950 YbgI/family dinuclear metal center protein Species=Allomyces macrogynus ATCC 38327
MALLRQVQSSFHKFAPLHLAETAWDNVGVLVEAPYPRQEADTVFLTIDLTPQVLEEALQL
GNVGVIVAYHPTIFRGWKKLNLATDGDAESIKQEVIMKLIARGISLYCPHTSLDAAQGGI
NDWLAKGLEQFGIKSTAPITPSNAANPGPEGSGRIIELTSPQSLPDVIAAIKKHLNLPFV
RVATAPRNHKISSIAMCAGSGASVFSRAATRPDLLWTGEMGHHEVLGAVQTGSHVVLCEH
TNTERGYLSAVLKPRLERDAGLKVVVSTVDRDPLVVQ
>A0A0L1KLF4_9EUGL A0A0L1KLF4 GN=XU18_4113 NGG1 interacting factor Species=Perkinsela sp. CCAP 1560/4
MCALVSRVVAALERIAPRQYADLSWDNVGLLVDAVDPPAHTQNRVGLALDLTTLVVQECV
DKSVGVLVCYHPAIFPSVKCLKSQHPKQKAILLAIRHGIAIISPHTALDNCPHGINSWIA
KGILKGSHHPCDDRIANERVASPADVLQYLDEDNRQGGKLWLNNPLSIARIVERMKLHFD
VQFVRCALGVEHTMDSPVRTIGICAGSGSSVLGPYAGQLDCVISGEISHHEILRLQQSGT
TVLLVEHGTSERGYLENKLLPRLEIVMRDIPLENGRCDETFIQTMKSDASLLSYC
>A0A0M0JAW7_9EUKA A0A0M0JAW7 GN=Ctob_009256 Nif3-like protein 1 Species=Chrysochromulina sp. CCMP291
MAWFGSPRGPPNAASSFTHLISSSLERRFPKKFASAGHTSGLTIGTLREAERGGTAVVVI
CVDLTEQVLAEAISLHANVIIACSLFPSEPLRSLRVDEPVGRIVLRCAQQSIAAHCLSSA
CANAPGGVADWLAKSIASGATRPIVPHAECAEAGEGRLLECNEAISLSAIIARLKDILGV
RHLRISLGAVVDELNIAKASDSCFIKSIAVHIGEGGELLHHLMRQPGAAFSGVFLSGEMP
HADLLAASAKGIIVVLAGQSTVERAFLRQLRQDLQAEFTDADWNVKIKCSETDCHTLTVV
>A0A0P7XQ28_9TELE A0A0P7XQ28 GN=Z043_103118 NIF3-like protein 1 Species=Scleropages formosus
MFKLSFISHSAQAMNLPDILEVLEQLAPLSLAEPWDNVGLLVEPSKPRLVQKILLTNDLT
VSVMEEAEVMSCDLIISYHPPLFKPFKRLVQKDWKQQLAIRAVEAGIAIYSPHTALDSVK
GGINDWLIGGVGSGSVSVLRQAVSSGPLCHKLEFTVRNHEELETVLSELGDRGTGVTFSA
ARPDSHAYSVRVSCCDSALTSVVQTLWQHSTPQQSLSILPVSKQPLLGCGVGRRGTLDEP
ISIETAVNRMKAHLGLKHLRLALGAQKTLESTVTTVAVCAGSGGSVLQGVTADLYITGEM
SHHEVLDAVAAGTSVILTDHSNSERGFLSVLRERLSVHLDDSVSVQLSQKDRDPLEVM
>A0A0S4JZ92_BODSA A0A0S4JZ92 GN=BSAL_48245 NGG1 interacting factor 3-like, putative Species=Bodo saltans
MEQIAPLALADTTWDNVGILVENPKPNAYSRVMLTIDLTPAHLQECIEKQIGVIVSYHPP
IFASMKRLTLKNPKQEIVLRTVAEGMSIFSPHTSLDAARGGMNDWLASIVDSQSDRVFPI
IPTAGTEVSAGSTGMGRVVELRNPISFKELVERVKIGLGIPTVRVSAPGGQERLVRRVAV
CVGSGTSVFKSLKSGAVDVLLSGEMGHHDVLAAADNNQSVILTEHTNTERGFLRAVLKGA
LQEKLGEDVAIEVSTRDADPLVVW
>A0A0W4ZH23_PNECA A0A0W4ZH23 GN=T552_02118 YbgI/family dinuclear metal center protein Species=Pneumocystis carinii B80
MKSSSWLATLIRSIERLYPRSLSDLSWDNTGLLLESPVKNPDRKRVLLAIDLTTAVAEEA
LTMYPPVGAIVAYRECFESIYSGYIEWSEDPIIFNPIKSLTLSDPQQRTLLRLAASGISV
YSPHTAMDAAVGGINDWLADGIWDNKCIERTVIRPSESVEGNEKFGNMTGMGRMIRWNEP
ISISTLVKRIKKHLKLAQIRLALSEKHRREGGNCIYKIGICAGSGGSILRNVHADVLFTG
ELSHHDILHATEKGSSVILCGHSNTERGFLSCVMKKKLQDVLYDEFSAMQDDQLLLPEVV
VSEADKDPLEVV
>A0A139AHU6_GONPR A0A139AHU6 GN=M427DRAFT_56278 NGG1p interacting factor 3 Species=Gonapodya prolifera JEL478
MALLRRVIRAFEQFAPLSLAESWDNVGVLLEAPFSNADATSVLLTIDLTTPVLEEALAIR
PPVGVIVSYHPVLFRAEKRFTMADPKQRIALKCAAAGISIFSPHTALDSTIGGINDHLAS
IFPNVKVVAPITPSTSPLASSAPFNCRNHYSFDGLPLPSTPGSGRIVTLDQPHGFSDLLA
RIKATLGLPRIRISRPFNPVEEIRTIAICAGSGSSVLVPLAGKADLLFTGEMSHHDLLAC
QEKGSIAVMCEHSGSERRYLMCLKDVLGEVLKSDGGDVANVVVSEKDKDPVEIV
>A0A151NAT6_ALLMI A0A151NAT6 GN=NIF3L1 NIF3-like protein 1 Species=Alligator mississippiensis
MELRAVAAALDALAPPGLAASWDNVGLLCEPSPPHAVRTLLLTTDLTEPVLDEALARGAE
LVLAYHPPLFRPLRRLTPSAAWRDRLLLRAAERRVGLYSPHTALDALPRGVNAWLAAALG
ASTSSVPIQPSTALTYPTEGSHRVEFIVGQAEQLEAVLSKVQTIPEVSSVVTLPARAEGE
DQTRVSLNCSEKAMQDVVALLSQNGLYHKTEILLLQKPLLPQTGMGRLCKLSEPASLSAL
IERIKNYLKLSYVRLALGVGKTLESQIRTAAVCAGSGRSVLQGVEADLYLTGEMSHHEVL
DVVGNGISKSIETLFNWHRRKQRLTN
>A0A165G8H1_9PEZI A0A165G8H1 GN=L228DRAFT_248626 NIF3-domain-containing protein Species=Xylona heveae TC161
MSSPAVASPFTRAVVNSMRKLYPEALADRSWDNTGLLLEAPFDPARKQANSVLLTVDLTR
AVADEAIERKDSIIIAYHPIIFRGLKSLTFADSQQQTLLRLAQAGISVYSPHTAVDAAPG
GVNDWLADIVTGQLIGEEETPDEDEIAESVSESDVPDQNEKTADQVSTPRTPEEQADTDE
GQLSVQPIPKYSDPTYPEPPQEKAILEPATSDHERAVIQRVDGVDGFEEAGMGRIIRFSK
PHALNTLIERVARGLGNPKAFPIAIPQGKTIDEIEISSVGICAGSGGSLFRNLDVDLFFT
GELSHHEALAAIERGQCIITLFHSNTERGFLHSVLRDQLSTTLKDEWQRIRSGELEKLRI
DFPPPSSARPQSSSTRPQISRKATSSSNFHDPFVTSSASGPPASGKSQGATDGSAVSAAA
LRSILEDESVEVHVSERDRDPYGIVILKSEVDVDVGVDAGSDTELEGDI
>A0A167JYE6_9BASI A0A167JYE6 GN=CALVIDRAFT_539443 NGG1p interacting factor 3 Species=Calocera viscosa TUFC12733
MSVIQQVARAMERIAPLSLAESWDNVGILLEAVKPLTSQRVLLTIDLTPPVLASALSHPN
PPSTIISYHPPIFAPLKSLTHRTPLQHTLLSLAREGISVYTPHTALDNTDQGVNWWLAQA
FQPFRGRWEKWERGGGVVHLPRPVGMREVVQEVKRHLGVQTVNVGTSNPEGTVQVQRIAL
CAGSGGTSLAEQGGEADCWLTGEMGHHELLAALASGKTVILCGHTNTERGYLPLLREKLL
GELGQGWEVDVSEVDGHPLTVQ
>A0A177WV10_BATDE A0A177WV10 GN=BDEG_26653 YbgI/family dinuclear metal center protein Species=Batrachochytrium dendrobatidis JEL423
MMKRTPSLLQRVMRSMEKIAPLSLSEAAWDNTGLLLEAPFPRPNASKVFLTIDLTQEVLE
EAIQDPAVGVIVAYHPALFKPFKRLCLNDDRQSIALKCAATGISIYSPHTALDSCVGGIN
DWLSRGLGKGRTVPISVNVNPPPGQDGCGVGRLHTLDTPVSLDEVVRRVKSHLNLNHLRL
ARAADYRTDTKLVSTIAICAGSGFSVLDGVTADVYFTGEMSHHEVLGGVSKGINVILCEH
TNTERGYLSQVLQARLLSLLKVDLGLDVEADVHIDVTVSKCDQDPFVIV
>A7SAJ3_NEMVE A7SAJ3 GN=v1g187611 NIF3-like protein 1 Species=Nematostella vectensis
MDLKEVVSNLESWAPTSLAEKWDNVGLLVEPSGQHNVRSILLTNDLTEKVLQEAIEKRAN
MIISYHPPIFVPLKRLTSKSFKERIIVKAIEERIAIYSPHTAFDAVFGGVNDWLAKGLGR
GSVDPITYSMEACVKGCDYNVTAIAPSTEAAEKINSQINSLGGIGSNSIGKTERFGDPAL
PKIVTHCSGDTLSAVMQILQSYTIYYLEIYQLAKKPIPGTGSGRLCTLDTPVTLPDIIHR
IKKHLQLPHLRVAYAPSKAKDTLLSTVALCAGSGASVLQGVAADVYLTGEMSHHEVLEAV
SRGVHVILCEHSNTERGFLVPFRQQLYNMLSGQVQVMVSETDADPLLVV
>A8N3H0_COPC7 A8N3H0 GN=CC1G_00726 NGG1 interacting factor 3 Species=Coprinopsis cinerea (strain Okayama-7 / 130 / ATCC MYA-4618 / FGSC 9003)
MSNPLLNLTTSVLSEALAKETSVIVAYHPTIFKGLQSLTLANPLQRSLLQCAAEGVSVYS
PHTALDSVWGGINDWLARGMLGSSLSSSSSPEEGIVEPLVGLKLGANGESEGAEGRLVTL
NQPIEIDELVRRIKSHLKLANVQVGYPDVAEGSPSKLVQTIAICAGSGGSMLVGKPADVY
FTGEMSHHEVLASVAAGKHVILCGHTNTERGYLPILAEKLRNGLSEDQEFGEAVEVLVSR
GYTLRYSNIRIHNHAMSTRCRQSNQTTDRCRLA
>A8PVX1_MALGO A8PVX1 GN=MGL_0975 Uncharacterized protein Species=Malassezia globosa (strain ATCC MYA-4612 / CBS 7966)
MSSTNTAEDLTLKNVLSWFDKNAPTCLADSWDNVGLIAQSPVPKEDDKARGLFLAIDLTP
AVAEELLAKPDVRVAIVYHPVIFSPIRSITMQNPLQRSILRCIAAGIHIYCPHTTLDACL
GGINDWLVTGLEHAWESSHVPKPESLLRAVQNASYEIIEPSKDDPSVGMGRAHTFAQPCS
WAALIHRVKALLRVSHVQIAAASGVNETTQIRSIAVCAGSGGSVLRGWTDADVYVTGEMG
HHDILAANARGISVILTNHTNTERRYLVDVLQPALSSSLPGSHVYVSERDADPLCVA
>B3S4G2_TRIAD B3S4G2 GN=TRIADDRAFT_28889 NIF3-like protein 1 Species=Trichoplax adhaerens
MELQEVVVKLERFGPNSLAEKWDNVGLLVEPSKPHLVRKLMITNDLTEAVLKESIAEKAD
MILSYHPPIFAPLKKLTNSSVKERILVSAIENRIAVYSPHTIYDSLKGGVTDWLASCLGE
YTTQPVIPFFDESASGYYKLEMYISKDKQHNWSEVLNNYNKENSVQDIIVSDLVDPKGCV
KYGITCSRSGMFQILDSYHEMFDRNDNLQITKLSSKPILGTGSGRICRLVEPVSLQILIA
QVKKHLNLSSLRLAADFYKPLSKLIRTVAVVAGAGGSLLKGVKADLYLTGEMSHHDVLAA
VASGTCVLLCDHTNTERGYLFNKLKLDLGSLLDNRIEIITSKVDGDPLAVI
>B7PB02_IXOSC B7PB02 GN=IscW_ISCW024180 Putative uncharacterized protein (Fragment) Species=Ixodes scapularis
MRVLELRRLALHTSLLVRQPVSRLCHRLSSMDLCGVVKTLERMAPLRLAAPWDNVGLLVE
PSSCRVRTVLLTNDLIPEVVDEAVSLGADLIVSYHPPIFVPLKALRQSSWKERLLVRCIE
RQIAVFSPHTSWDAVRGGVNDWLASCFDGAADSEPVEKDSVDPDAGMGRLLRLRAPVTVG
EAAARVKAHLKLPSVRLALGSGQTAESTVQAVAVCAGSGGSVLKGVAGAELYLTGEMSHH
EVLDAQQRGVSVLLTEHSYSERGLPRAVRREAPPRAGCGRRAGVDCGHRTAGRALGGRVS
>C3YCU2_BRAFL C3YCU2 GN=BRAFLDRAFT_87445 Putative uncharacterized protein Species=Branchiostoma floridae
MADLTKVVTVLNGFAPPSLAESWDNVGLLVEPSPPHEVSRMLLTNDLTEGVLAEAVHKKA
NFILSYHPPIFVPLKRLTQRSWKERIAVRCLENRIAVYSPHTAYDAVKGGVNDWLASGLD
SSGDCTRINVRCSQHALVQAVDCVNQTLGDKAGTSLQVVKLEKPPLPGAGMGRLVTLDDP
VTLSALLSRVKTHLGLNHVRLAMGEGRTMEGSTVRSVALCAGSGGSVLKGVKADVYLTGE
MSHHNVLDAVAMGTSVILCEHSNTERGFLRVLQGQLTAMLDGKVEVVVSDVDKDPLEVV
>C4M6M9_ENTHI C4M6M9 GN=CL6EHI_161860 NGG1-interacting factor 3, putative Species=Entamoeba histolytica
MKIEEFARLFEKYYPKQLAENWDNTGILINSEEEFNLVLVCIDITESVIDEAINKKCKAI
LSYHPTLFKSFKKLVPETRSQKLALRLLKNGISVYSPHSALDSVNGGINDWLASLVLNEP
VSLTSVPKNTTAIEPSQSDISIGSGRYVTYDTPITIDEFIDRIKNGLDVPLRYAIPSTKK
EIKTVAICCGSGSMMFANKCADAVITGEMGHHEVLEHLEWNTAVVLSEHTNTERGYLKHW
IPRLSELFPSVTFYQSECDVSPLVYMV
>C4V892_NOSCE C4V892 GN=NCER_100701 Putative uncharacterized protein Species=Nosema ceranae (strain BRL01)
MADNRFLYIFNIYGLIFFIYVSRFNTLKVKPQLMLITDIEDKINQIYPLSGAQEWDNVGV
LVDTGSSSNKVLLTIDVTELVIDECNRLGIKHIISYHPVIFSGVKKLLKNDIVTKLIKFD
INVFCPHTSWDEEMNRYLFCLLDNQNVEQVFDTLKNKIGLKHIRVANMSAGRKSLVVGVG
SAFKYHEYKNSLIVTGEMSHHCLLHSIRHNNTVILLEHSNSERVVLPYFKDKLEKILPEC
DIFISKNDKDPIDIL
>D5GQ55_TUBMM D5GQ55 GN=GSTUM_00012204001 Uncharacterized protein Species=Tuber melanosporum (strain Mel28)
MSSNAIIRSRTLRTVVNAVQKLYPQALADRTWDNTGLLLEAPDRTDRSSPEAHNVLLTID
LTKAVVDEAISLRSSVIVAYHPIIFRPLKSLTLANTQQESLLRLAQEGISVYSPHTAVDA
KIGGVNDWLADGISGGRGEESGRVVIEGIKDDSGMGRIITLKEPKGFQELVNRVKGFLGL
KNVMVGKTPGDKRVRTIAICAGSGASMFKNVDVDLLFTGELSHHDALAAKERGVGFITCF
HTNTERGFLRDVMKRKLAEVLESEVEREGEFEVVVSERDMDPFEIV
>D8LW09_BLAHO D8LW09 GN=GSBLH_T00006063001 Uncharacterized protein Species=Blastocystis hominis
MNASAIITYHPIIFHGIKKLTPDDRVARIVMGCIKNDIAVYSPHTACDASKGGVNDWIVD
GLGEIASSAPITPDRENPEFGIGRIATLASPYPTISQLIERMKVHFAIPHLQLATNLPLD
SPVRKVAVCAGSGDSVLAVIEADFYVSGELSHHVILDAVSHDRSVMVCNHSNTERGFLKE
LRARLESELGEEFTFVVSQTDRDPLSVFCFVCSTPVIRLIVYLFVDVSS
>E0VU56_PEDHC E0VU56 GN=Phum_PHUM446240 Protein anon-35F/36A, putative Species=Pediculus humanus subsp. corporis
MSTQISVGVDLKSIINFLKSFAPINLSESWDNTGLLVEPSTVTPVKCVLLTNDLTEDVLK
EALEFKTGLIISYHPPIFKPLTKITTSSWKERIIGTCLENKIAIYSPHTSWDSISGGVND
WLAKGFDVETINPITPTNLSDNPNAGIGRFCILKKEITILEAVDIVKKLTSLQFINLALA
RSASLETKIKKIGICAGSGSSVLQNIQADLFLTGEMSHHSLLEAIHNNTSVILCNHSNSE
RGFLKEFSKILEGNFNKYDLKVLVSKTDRDPIQTI
>E2RQI7_CANLF E2RQI7 GN=NIF3L1 Uncharacterized protein Species=Canis lupus familiaris
MYLYHFLCFGFRYSVLPDFCMLSSRVRLIPRTVRLVHSLIYNSCHSSMDLKALLCSLNDF
ASLSLAESWDNVGLLVEPSPPHTVNTLFLTNDLTEEVMEEALQKKADLILSYHPPIFRPL
KHITWKTWKERLVIRALENRVGIYSPHTAYDAAPQGVNSWLAKGLGVCTSRPIHPSRAPN
YPTTGTHRVEFSVNGTEDLDKVISAVKRIADVSVTSFSTRTDNEEQTRISLNCSQEALIQ
VVAFLSQSKQFYQKTEILSLEKPLLLHTGMGRLCTLDESVSLATMIDRIKRHLKLSHVRL
ALGVGRTLESPVKVVALCAGSGSTVLQGAEADLYLTGEMSHHDVLDAASQGINVILCEHS
NTERGFLSDLRDMLGAHLENKINIILSETDRDPLHVV
>E3K2F0_PUCGT E3K2F0 GN=PGTG_04475 Uncharacterized protein Species=Puccinia graminis f. sp. tritici (strain CRL 75-36-700-3 / race SCCL)
MSLIKAVQRAFSKMAPVSLAESWDNTGLLLESPVIRPLANKVLLTIDLTPSVAEEALAKD
SNVGVIVAYHPTIFRGLKSLTLGDPLQEIILKCASAGISVYSPHTALDSVIGGINDELCE
IVSGQIPHQNKIYSVSGAIVEKIPENVLSGVGLGGGRRVEFAKGEEVDLDQLISRVKAGL
GIPHVQLAKSSFAPPTIRSVGVCAGSGGSICSALGKSCDAFVTGEMSHHELLSANARGIH
IILTAHTNTERFFLAKVLQPRLHELLLDEAAQMSEHQTPQWEVEVSVADRDPLVVA
>E4XBT5_OIKDI E4XBT5 GN=GSOID_T00006592001 Uncharacterized protein Species=Oikopleura dioica
MKLRAFCDVLEKLAPTRYAAKWDNVGLLLEPADCFVERVLLTNDLTSRVMKEAVDFKANI
IISYHPPLFREFKRISQDNWKDRIVTECLKHNIAIYSPHTAHDAWAEGVNAWLIEGIIGH
SNHSPISPTIDSRETYEISGKVAESVNRKSFRKHFNKTKISDSGDISGRIFKRDLPKLSE
KYLSEIENFQLLCLGSLPVVGTGMGRKGELAEQMKLNDIVDITKKHLKLANLRLVTANDK
TSEDMVSTVAVCAGSGASVLSHAGKVDLWITGEMGHHEALDAHENNTSVILAEHSNTERG
FLESFKAKLMDNEQIKKRDIQFVVSDVDSDPIKVV
>E9FYI0_DAPPU E9FYI0 GN=DAPPUDRAFT_43076 Putative uncharacterized protein Species=Daphnia pulex
MSSLTLNSVVDEFNRLAPLSLAESWDNVGLLVEPTSSKIIKKILLTNDLTNSVMQEAESS
SVDLIYSYHPPIFAPLKRITASNWKENIIARCLENKIAVYSPHTALDALKGGVNDWLAEA
FEGKKLVRSILELVASVPEARLEEHISTADGYEQMTIMAPEKALPSIIELVNQCSFANAS
RYVRIIRVEKPPIPGSGMGRLIRLSEPITINRVVELVKTHLKLQHVRLATAGNAENNMNV
ETIALCAGSGASLLKNVKADVFLTGEMSHHEVLDAVHRGTSVILCEHSNTERGFLSKWKE
VLHSALGEDVQIDVSLNDHDPLQVV
>F1NDR9_CHICK F1NDR9 GN=NIF3L1 NIF3-like protein 1 Species=Gallus gallus
MLLLCRPLHRIRAAGRPPSRCLMNLKELVPALNDFASLSLAESWDNVGLLVEPSPPHAVR
TLLLTNDLTEPVMEEAVQKNADLILSYHPPIFAPLKRVTWRTWKERLVVRALEHRIGIYS
PHTAYDAVPHGVNNWLSKGLGTCTSVPLHPSTAPSHPTEGTHRVEFCADTTEHLEIVLSK
IKDIPEVFCLTTLPVRVDGEEQTRVSLNCSQKALLEVVALLSQDSLLYQRTEILLLQKPL
LPHTGMGRLCTLSEPASLSDITERIKSHLKLPHVRLAVGTGKTLDSPVKKAALCAGSGSS
VLKGVEADLYLTGEMSHHDVLDAVANGISVILCEHSNTERGFLSELRDTLTIHLQNKINI
ILSEKDRDPLQVV
>F1QAA0_DANRE F1QAA0 GN=nif3l1 NIF3-like protein 1 Species=Danio rerio
MDLKGVLEVLEQLAPLSLAESWDNVGLLVEPSRPRPIKTILLTNDLTAAVMDEAVGMKCD
LIVSYHPPLFRPFKRLLQKDWKQRLAVRAIENGIGIFSPHTSWDSVEGGVNDWLVGGMGR
GKVSVLSQAVSSGAQKHRIEFSCMDDGEVNSLLEQLRHTEGSETFQCTRIKSESGGQQVN
LTCRSSALTGAVQILLSHPHTSKSLNITQVQQPPLLGCGQGRLSVLEEPVSVSTAVQKMK
THLGLPHLRLALGDQQTLDSMVKTVAVCAGSGASVIQGVTADLYITGEMSHHEVLDAVSK
GTSVILSEHSNSERGFLGVFRERLSARLDHTVSIVISQTDRDPLQVV
>F6UUV5_CIOIN F6UUV5 GN=LOC100186638 NIF3-like protein 1 Species=Ciona intestinalis
MELTEVVACLNKLAPLHNAGSWDNVGLLVEPSPPHTVSRIMLTNDLTETVLQEGISANVN
MIVSYHPPIFRPLKRLTMSTWKERIVVKSLENRIAIYSPHTACDAVQGGVNDWLASGLGE
MKSIKPIIRSNIKADNYSVSIAIQSSNDKDLLDSFEQNLSQIVKFVRRTNVDAIEYECQC
AKSKMKDIVDMSHTYNLDAKFNVIELAELPASDTGMGRLCVLNTPCTVAELITRIKKLMS
IPYVRLSLGSDKTVTSMVNTVALCAGSGSSVLSGVKADVYLSGEMSHHEVLDAASNGVTT
VLCEHSNTERGHLKSMKKSLEDMLGSSLVKIIVSLVDEDPLHIC
>F6WRF6_XENTR F6WRF6 GN=nif3l1 NIF3-like protein 1 Species=Xenopus tropicalis
MDLGSVVSCLNVLTPPALAEGWDNVGLLVEPSPPHQVHKLLLTNDLTEDVLDEAIDTGAN
MILSYHPPVFKALKRITQKSWKERLVVKALEKRLAVYSPHTSCDALANGVNDWLARALGP
SKSVPLRASTSLTYPGGVGHLLEFRLDPAGNIMSRLNGIQGVSVCTSTARHDGDNGTRVS
LSCSQNALVEVLSILSEEPQVYNSLQLLTLQKPPLVDTGMGRLCTLSEPVSIAAALERIK
KHLHLPHLRLALGRGRTLESSVSMAAVCAGSGSSILSGVPAELYLTGEMSHHDVLDAVAE
GRSVVLCEHSNSERGYLQELGGQIRQALEGQVQVVVSQRDRDPLQVV
>F7FUK4_MONDO F7FUK4 GN=NIF3L1 Uncharacterized protein Species=Monodelphis domestica
MLACVGLVSRKFQAPQSLFSRKFQAPQSLFSRKFQAPQSLVSRKFQAPQSLTSRKFQAPQ
SLTSRKFQAPQSLVSNPSRPFMDLKTLVASLNDFASLAFAENWDNVGLLVEPSPPHTVKT
LLLTNDLTEEVMEEALQRKADLILSYHPPIFRPLKRITWKTWKERLVIRALENRIAVYSP
HTAYDALPQGVNNWLAKGIGVCTSLPIHPSKAPNCPTTGTHRVEFNINDTPSMDKFMSAV
KEIPEISITTLSARNDGEEQVRVSLNCTQKSLLRVVAFLSENSHLYQKTEILSLEKPLLL
NTGMGRLCTLVESASLATMIERIKGHLKLAHLRLALGVGRTLESPIKVVALCAGSGSSVL
QGVEADLYLTGEMSHHDVLDAAAQGINVILCEHSNTERGFLSELQDTLTAHLEYKVNIIL
SETDRDPLQVV
>G1KTG6_ANOCA G1KTG6 GN=NIF3L1 Uncharacterized protein Species=Anolis carolinensis
MQLSRLKPTPQRLLNVQSWIGMPLRAVMDLKVLVSSLNEFAPLSLAESWDNVGLLVEPSP
PHTVSTLFLTNDLTEEVMEEALQKKANLILSYHPPIFQPLKRLTWKTWKERLIIQALENR
VAVYSPHTAYDAVPHGVNNWLAKGLEGPCTSVPLQPASALDYPSEGSHRVEFNACSSENL
ETVLSSMHKLPGVSFITTLPIRAEGDEQTRVSLNCTQQALVQVMALLSQNSHVYRKTEII
SLQKPLLADTGMGRLCTLKEPVSISILVERVKSHLRLPHVRLALGTGKSLESQVKVVALC
AGSGASVLRGTESDLYLTGEMSHHDVLDAVSKGITVILCEHSNTERGFLLELQQALALHL
DGKIHIIVSERDRDPLKVA
>G1X5N0_ARTOA G1X5N0 GN=AOL_s00054g174 Uncharacterized protein Species=Arthrobotrys oligospora (strain ATCC 24927 / CBS 115.81 / DSM 1491)
MSTQPSPILRTILTALRRLYPEHLADKAWDNTGLLLSPPPLTLSSSTLRAPRILLTVDLT
TAVATEAISLNAAMVVTYHPIIFRPLKSLTTDNTQQTTLLRLVQAGISVYSPHTAVDAVR
GGVNDWLASGISGGEEYEASRTAIQPCASAQGTEHEGAGYGRLVTLKEPTDIRSIVERVK
SFLGMSYLQVALAKRHTATPTERDIRTIGICAGSGGSVFRDVKADLLFTGEMSHHEALAA
KESGTSIVACFHSNTERGYLPFMRQKLLETLPRAWEETVEEEGSDEMLDVEGWEVHISGV
DRDPYDIV
>G4LY02_SCHMA G4LY02 GN=Smp_051390 NIF3-like protein 1 Species=Schistosoma mansoni
MFLSKLAQKGMELTKIVQLLDAYCLPHLAEKWDNVGLLIEPSLPHHVDRIFITNDLTEQV
LDEAISQKCGLIVSYHPPIFSPLKKLTQQHWKERIVIRCIENKIGVFSPHTGLDAKLGGI
NDWLLEPLAVNRRESLSRSPITQTLSRLTVVMNENFGDFVISTGVGVCATNIKSNAGITA
IVTCTESDLKRVVDVTEESKISVVSIDTIQKTSEEGCGRLVTLQFPVHLKAVIAAYKKFL
NMGHLTVAPGLGKTLDCPIKTVAVCAGSGGSLLCQTPASFAADLFITGELSHHDRLEAVS
RGISIILAGHSVTERGFFKERFIPDFRHLLSTVHNAGEIPHVELLLSEADHEPGFVV
>G7E7Z1_MIXOS G7E7Z1 GN=Mo05639 Uncharacterized protein Species=Mixia osmundae (strain CBS 9802 / IAM 14324 / JCM 22182 / KY 12970)
MALSPLGRAVARSFDKIAPLSLAESWDNVGWLLQAARPRTGRPGRTVVLTIDLTTAVYRN
LPEDTGIVVAYHPTLFSSIKQIGIGNNALQASILGLARDGISLYSPHTCLDAAVGGINTW
LASAFDNVSDAKVCRPVANPPAHHEGAGLGKQVQLSSDVELDEAVKRIKSHLNLKTVMLA
RSDQPRSQRVRSIAICAGSGGSVIGNADADLLWTGEMSHHEILAATARGTHVVLCNHSNT
ERGYLHTLKRKLEEELSTDPQAESEAWRVIIAQEDRDPLDDEAASQNTFSVVSLRCCSGA
QSSFVDEPRHKDKSAWGARVSLEYFEATSVIGKTAARSRT
>H2R3D2_PANTR H2R3D2 GN=NIF3L1 NIF3-like protein 1 Species=Pan troglodytes
MLSSCVRPVPTTVRFVDSLICNSSRSFMDLKALLSSLNDFASLSFAESWDNVGLLVEPSP
PHTVNTLFLTNDLTEEVMEEVLQKKADLILSYHPPIFRPMKRITWNTWKERLVIRALENR
VGIYSPHTAYDAAPQGVNNWLAKGLGACTSRPIHPSKAANYPTEGNHRVEFNVNYTQDLD
KVMSAVKGIDGVSVTSFSARTGNEEQTRINLNCTQKALMQVVDFLSRNKQLYQKTEILSL
EKPLLLHTGMGRLCTLDESVSLATMIDRIKRHLKLSHIRLALGVGRTLESQVKVVALCAG
SGSSVLQGVEADLYLTGEMSHHDILDAASQGINVILCEHSNTERGFLSDLRDMLDSHLEN
KINIILSETDRDPLQVV
>H3AR89_LATCH H3AR89 GN=NIF3L1 Uncharacterized protein Species=Latimeria chalumnae
MVLTRPTERVSFSVCSFEGNTALFFRRMEVSCRLYVRMAESPPGRQEKGGQWSTDLPSCF
SLFMLARCLFALPRQLLQAHSSACAVTQRATMDLSKVVSSLDEFAALSLAESWDNVGLLV
EPSPPHTVRTLFLTNDLTEDVMGEALAQRADLILAYHPPIFRPLKRVTWRTWKERLVVQA
LENRVAIYSPHTVYDALPNGVNKWLAKGLGVCSTEPIQLSTASAYPSLGSHRIEFSVHQS
QDLDGILSSVWKIQGISVSTLPVRCDGEERTRVCLNTTQQALPEVMALLSQNGLTHRVEI
IPLQKPPLPNTGMGRLCQLKEPVSIATVVERIKNHLKLNHVRLALGSGKTLDSVLKTAAV
CAGSGGSVLQGIEADLYLTGEMSHHDVLDAVAKGTSVVLCEHSNTERGFLSELKEMLTAR
FHKQLKVIVSSVDKDPLQVL
>I1FX81_AMPQE I1FX81 GN=LOC100633892 Uncharacterized protein Species=Amphimedon queenslandica
MSSLMKLKSFVSILESIAPTNAVPEWDNVGLLVHPSSASNVSHIFMTIDLTEEVLEEALE
CSQSGEKVDMIISYHPPIFKPFKRLTQSSAKERIILKCIESGIAVYSPHTAHDSIWGGIN
DWILKAFNQGTVHPISYNQSPDKQPIELLVSSFSNKTEANEVAKSIIASGNVTGDNMEIL
VTENLSGISSYKLKCSVTETAVKPLMPMLMKDWPQYKISMSPSPKIPSIGPGRFIKFSSP
CTLDTLVSQIKSYLNLTNIRLARPSSWKEGQLASSLAVCVGSGASVLRCTRPDVYLTGEM
SHHEILEATAKGIVVILCEHSNTERGFLHILKSLIEEKLQQSTPLKITISGVDRDPVTIV
>I1RQH6_GIBZE I1RQH6 GN=FG06319.1 Uncharacterized protein Species=Gibberella zeae (strain PH-1 / ATCC MYA-4620 / FGSC 9075 / NRRL 31084)
MSESGAWGAWQVETSSFTKAVVASIQKLYPEEIADRSWDNVGLLVGNSEEDTKKKKRVLV
TNDLTYQVAMDAIEQDVSVIVSYHPFIFGGLKSITNNDPQQATLLKLTKAGMAVYCPHTA
VDAAPEGLNTWLADIVSGPHESKRSVANPAVNAPSSHAGAGYGAIGRFDSSVSLSEIIIR
LAEKLGGLKHVMVASPVGADIKTTKVSSFGVCAGSGYDVLKKADVDLIVTGETSHHSALR
AIQQGRTLVQVFHSNSERGYLQEVLRPRLEAAIRETVPEVEVVTSKVDKDPFTILDVSDL
K
>I3JZV4_ORENI I3JZV4 GN=nif3l1 Uncharacterized protein Species=Oreochromis niloticus
MLTGCRNLSWTFFSLTSRRLWPRQSFTSRAALCSSAFSSVLHSLSSSTHSHHFLPSTQSS
ARLPPSFNFSSAHSSGLMELKEVLQVLEQLAPLSLAESWDNVGLLVEPSKPRPVKTILLT
NDLTDAVMEEAVAVSCDLIISYHPPLFRPIKRLVQKDWKQRLAVRAVEAGIAVFSPHTSW
DCVKGGVNDWLVGGLGSGQVSVLSQVLGAASHSHKLEFTVRSAEELNMIMEELKACDSGT
TLQHSGSRPDSSGIHVSVTCCDSALTPSVQALLGHSTPSQSLSIVKLEKHPLLGHGQGRR
SVLDQPVTVGAAVQKLKSHLGLSHLRLAVGWGQTLESSVCTVAVCAGSGASVLNGVKADL
YVTGEMSHHEVLDAVAKGTSVILSDHSNSERGYLAVFRERLAVRLPDSVTVVLSKADRDP
LEVV
>J9JXV7_ACYPI J9JXV7 GN= Uncharacterized protein Species=Acyrthosiphon pisum
MISKSHFRCLLNRHRSFTFLKATTTRTGSHPWTVHPYCITGQRNMATLSEVISTLKKMAP
LSLAESWDNVGLLVEPDVQTSVSRVFLTNDLTEDVLEEAVSVDANLIVSYHPPVFAPFKR
ITSDAWKSRIVSRCLGRGIAVYSPHTSWDAVENGLTDWLISCFDGTVSTIQPLKINPEFS
HVVTLSATLSDNTLLGGKEIRTIVESSDFQADKHFKIVGYNDSQLQLLCNSSSLVTLNKI
SKFSKHNLFFCANKNEPLPSCSTGSGRCCQFRNGLTINAAIEKIKSHLGVDNLMIALARG
STFESTIDSAAAVAGSGASVLRGVHAGLYLTGEMSHHDVLDAVHNNVTVVLANHSNTERS
YLNVFAGRLLAEMPQLNVHVSKVDRDPLVFV
>K1RLN1_CRAGI K1RLN1 GN=CGI_10016084 NIF3-like protein 1 Species=Crassostrea gigas
MDLKSVVKKLQQFADPSLAESWDNVGLLVEPTPPHEVKKVMLTNDLTEAVYREACDWNAN
LIISYHPPIFAPMKKLVQSNWKDRIITGCIENRIAIYSPHTSYDALAGGVNDWLLQAFDI
SSSKPVTQSVTSAGPYNKKLQLTISSTDRESILKCVSGIENTFTTVNELNKEFCEINILC
GSGTIPAILESTQCFCDKIQSTALFDIQKIPKSGYGMGRIGKLTSPISVSEAVERVKKHL
GLAHIRLAKGIGCDSISSVAVCAGSGGGLLKNLNVSLYVTGEMSHHDVLHAAQSGVSVIL
CDHSNTERGFLKVLQESLTKVFQNQVDIQVSKSDKDPLDVV
>K7ITJ5_NASVI K7ITJ5 GN=LOC100119325 Uncharacterized protein Species=Nasonia vitripennis
MNTGNKKGLSLNQVLKALHSFANPSLAASWDNVGLLIEPTEPKNISHILLTNDLTEDVMQ
EAVELQVDMIISYHPPIFAPLKSVTTRTWKERIAAKCLENRIALYSPHTAFDCIRGGVND
WLAGAFKHKESHPIEPSVEPQNGMGRFIVLQDKISIGEAVELVKKQTGLPHVRLARARGS
SMHFYGSISKIGLCAGSGASVLKGLSADLYVTGEMLHHDILDAVHGGASVILTNHSDSER
GFLKAVFAQKLTSLLQDNVVVSVSEQDEDPLKTV
>L1J1Z6_GUITH L1J1Z6 GN=GUITHDRAFT_111577 Uncharacterized protein Species=Guillardia theta CCMP2712
MLGWVTRAVQAMQEMFPLELAEPWDNVGILVESSFTEEEIGESGAILFTNDLTEKVLEEA
LSAGAKLIITYHPRPFGSFKRLNLSDVTQRIVLRCARAGICVYSPHTACDNASGGVNDWL
AQAFSSDPQSISPVKPMKIEGNVNSTMRLEAPVVTTVPRLKPVTPSIPSLVLQDAFEAMV
AGYPGAGSGRIVQLQEHISLKDAVEVNNPQTLLKYSRSHVQLLRQCQRGAKLENIKIKSV
AVQAGSGGSVLLGCPADLLVMGEMSHHDALAAIAAGSSVILTEHSNSERGFLPQMVDLLQ
TRMQAAGYDKLQYIISTTDSDPLSVV
>L2GXP9_VAVCU L2GXP9 GN=VCUG_00501 Uncharacterized protein (Fragment) Species=Vavraia culicis (isolate floridensis)
MNHILPFFQLYAPLSGAASWDNVGILIPSNIENNDRKYLLTIDFTPQVLRECIEKNIKKV
ISYHPVLFNAQRDVGLFTAAIIENHISVFSPHTALDNLMNTTLLSKLGCFGIEVADSVAV
GNNGNRMSVIIDRLKKTCNAKEIRLALSDIHRMDSIPPYVYVGVGSAHFGGGENSVIITG
EMTHHNILKHKKFNTIMMLEHCRSERWFLEHLKGMMEDKIPGVQVIVSENDASPISFV
>L8GIV2_ACACA L8GIV2 GN=ACA1_096770 NIF3 family protein Species=Acanthamoeba castellanii str. Neff
MLEKHSECRLEMNCGKRQLVELEKVIRSVHPFEEPAWEAYPLADIPSSTTGSGRVRVLSE
AVELRALIDRVKAMLNLKTVRLAVSPKHSLQSAVKRVAMCAGSGGSVVKSARADVYLTGE
MSHHEVLDALAKGTSVILCEHTNTERGYLPVFKTMLEEKLQGKIDVHIATTDADPLTVV
>M7B7X3_CHEMY M7B7X3 GN=UY3_18578 NIF3-like protein 1 (Fragment) Species=Chelonia mydas
IQPLLVLPSRSFMDLKALVSSLNDFASLSLAESWDNVGLLVEPSPPHTVSTLFLTNDLTE
EVMQEALQRKADLILSYHPPIFRALKRITWKTWKERLVIQALEHRVGIYSPHTAYDAIPH
GVNNWLAKGLGACTTVPLHPSMAPSYPTEGTHRVEFSVDHTEHLETILSSMRGIPEISSL
ITLPARAEGEEQTRVSLNCTQKALLEVVALLSRNSLLYHKTEIMLLQKPLLPHTGMGRLC
TLSEPVSLSALTERIKSHLRLPYIRLALGTGKTLETKVKVAALCAGSGSSVLQGVEADLY
LTGEMSHHEVLDAVAKGISVILCEHSNTERGFLSELQDMLATHLENKITIIVSERDRDPL
QV
>M7S957_EUTLA M7S957 GN=UCREL1_10364 Putative ngg1 interacting factor protein Species=Eutypa lata (strain UCR-EL1)
MDPPLTLADTVVAIMRKQFPEELADGSWDNTGLLLGTAPPSSSSLVVDEALKENTRIIIC
YHPVIFRPLKSLTTEDPMQTQLLRLAAERISVYCPHTAMDAALGGLNDWLCDLLTQGVDA
EPVFRRAIQPVSSKPAPPEHQGAGYGRVMTLPQKVDLHTLLRRLNAGTTGSPYAMVATPS
HIRNSDASNPPMIGRIAVCAGSGAGVFKDLGDDNDVELLVTGEMSHHDALRHTQLGRVVA
TVFHSNSERRYLRDVLKPVLEGKLRGTPFGDTTRVIVSQADRDPFDIINIGPVA
>NIF3L_BOVIN Q05B89 GN=NIF3L1 NIF3-like protein 1 Species=Bos taurus
MLSSRVRLVATTARLVHSLIYSSSRSFMDLKALLSSLNDFASLSFAESWDNVGLLVEPSP
PHTVNTLFLTNDLTEEVMEEALQKKADLILSYHPPIFRPMKRITWKTWKERLVIRALENR
VGIYSPHTAYDAAPQGVNNWLAKGLGVCTSRPIHPSKAPDYPTEGTHRVEFSVTHTQDPD
KVISALKEIAGVSVTSFSARTDDEEQTRLSLNCTQQALMQVVAFLSQNRQFYQKTEILSL
EKPLLLYTGMGRLCTLDESVSLETMIERIKSHLKLSHVRLALGIGKTLESPVKVVALCAG
SGSSVLQGTDADLYLTGEMSHHDVLDAASQGISVILCEHSNTERGFLSDLRDMLDAHLEN
KINIILSETDRDPLHVI
>NIF3L_DICDI Q55E83 GN=nif3 NIF3-like protein 1 Species=Dictyostelium discoideum
MSSTTNSVKGKEVLKKLGELIPLNLAEKWDNVGLLVEPSNTDSMDIERIFLTNDLTEPVL
QEAINEKASFIISYHPPLFNQFKTVNQKSISQRIAIKSIENRIPIYSPHSALDSCDGGLN
DWISNALIKLNSGKGRSKPITPYQESLKSTQKISIYLHTNQPLTAEILKQLELNSNFQFY
STDKIELSCDQQQLLILINLIKSFSNEIKNWDIINQEKVLSLNNGSGKLVTLDDDGIDID
VIVKGVKELFNIEYVRIGRPLSGESKKIKTISLCAGSGGSVVFNAKADLYLTGELTHHAI
LDACAKGSYVIVCDHSNSERDYLPQILKPNLEKLFNGRIKVIVSKLDTDPLKVI
>NIF3L_DROME Q9NK57 GN=anon-35F/36A NIF3-like protein 1 Species=Drosophila melanogaster
MLRRMNTFSGQKLAAVVKELENFAPTSWAEKWDNVGLLIEPHREKQIKKILLTNDLTEPV
VKEALEKEAELIISYHPPIFKPLTRITQSHWKERVVAACLANDIALYSPHTAWDKKSGGV
NDWLSKAVNIISIRPLEPELGAPPGTGSGRYIETKMELSQVVESLQKRIRNSVHVALAVG
HTPKTLIQSVGICAGSGASLLKGIQADLIITGEMSHHEVLEFTHNNTTVLLCNHSNSERG
FLHEFCPILAKSLNEECLVFVSEVDKDPLVTVASDINKELSAFVDVYKSTSK
>NIF3L_HUMAN Q9GZT8 GN=NIF3L1 NIF3-like protein 1 Species=Homo sapiens
MLSSCVRPVPTTVRFVDSLICNSSRSFMDLKALLSSLNDFASLSFAESWDNVGLLVEPSP
PHTVNTLFLTNDLTEEVMEEVLQKKADLILSYHPPIFRPMKRITWNTWKERLVIRALENR
VGIYSPHTAYDAAPQGVNNWLAKGLGACTSRPIHPSKAPNYPTEGNHRVEFNVNYTQDLD
KVMSAVKGIDGVSVTSFSARTGNEEQTRINLNCTQKALMQVVDFLSRNKQLYQKTEILSL
EKPLLLHTGMGRLCTLDESVSLATMIDRIKRHLKLSHIRLALGVGRTLESQVKVVALCAG
SGSSVLQGVEADLYLTGEMSHHDTLDAASQGINVILCEHSNTERGFLSDLRDMLDSHLEN
KINIILSETDRDPLQVV
>NIF3L_MOUSE Q9EQ80 GN=Nif3l1 NIF3-like protein 1 Species=Mus musculus
MLSSAHLVPTSVQRAQSWICRSSRSFMDLKALLSSLNDFASLSFAESWDNVGLLVEPSPP
HTVNTLFLTNDLTEEVMDEALQKKADFILSYHPPIFRPMKHITWKTWKECLVIRALENRV
AVYSPHTAYDAAPQGVNSWLAKGLGTCTTRPIHPSRAPDYPTEGAHRLEFSVNRSQDLDK
VMSTLRGVGGVSVTSFPARCDGEEQTRISLNCTQKTLMQVLAFLSQDRQLYQKTEILSLE
KPLLLHTGMGRLCTLDESVSLAIMIERIKTHLKLSHLRLALGVGRTLESQVKVVALCAGS
GGSVLQGVEADLYLTGEMSHHDVLDAASKGINVILCEHSNTERGFLSELQEMLGVHFENK
INIILSETDRDPLRVV
>NIF3L_RAT Q4V7D6 GN=Nif3l1 NIF3-like protein 1 Species=Rattus norvegicus
MLSSAHVVPTSVRRAPSWICSSSRSFMDLKALLSSLNDFASLSFAESWDNVGLLVEPSPP
HTVNTLFLTNDLTEEVMEEALQKKADLILSYHPPIFRPMKHITWKTWKERLVIRALENRV
AIYSPHTAYDAAPQGVNSWLAKGLGTCTTRPIHPSKAPNYPTEGTHRLEFSANHSQDLDK
VMSAVKGVGGVSVTSFPARCDGEEQTRVSLNCTQKALMQVLAFLSQDRQLYQKTEILSLE
KPLLLHTGMGRLCTLDESVSLATMIERIKRHLKLPHLRLALGVGRTLESPVKVVALCAGS
GGSVLQGVEADLYLTGEMSHHDVLDAASKGINVILCEHSNTERGFLSDLQEMLGVHLENK
INIILSETDRDPLRVV
>NIF3_SCHPO O94404 GN=SPCC126.12 Protein NIF3 homolog Species=Schizosaccharomyces pombe (strain 972 / ATCC 24843)
MSKANISSKLKKVVESIYNPKLADSWDNTGLLLEAPFPRTNASSVLLTIDLTEKVAEEAI
SNKLVSSIVAYHPIIFRGLKAITMEDPQQRSLLKLAAEGIHVYSPHTAVDAAVDGVNDWL
AQGIAGGRNNIKSVVPTQQNSVMAEAEGYGRICELKIPTTLRELVQRAKELTGLQYVQVC
APNGLDSHISKVSLCAGSGGSVVMNTDADLYFTGELSHHQVLAAMAKGISVILCGHSNTE
RGYLKDVMCQKLASSFHKEGVDANVIVSSMDADPLTTM
>NIF3_YEAST P53081 GN=NIF3 NGG1-interacting factor 3 Species=Saccharomyces cerevisiae (strain ATCC 204508 / S288c)
MSRAITRAQLDKLVRSITKFYPQKYADKSWDNTGLLIDCSTAQVTTADANAKTKVLLTVD
LTKSVAQEAVDANCNVIVAYHPFIFPSWNRLSPHTNPQHETAIKLIQYGISVYCPHTAVD
AARGGVNDWLVRGLNNGENVAKSYALETVSGETDDLIGYGRFVEFNKDISLEQIVKNVKR
VLRVPYVQVASLAAPSAWNQLKIKKVAVCAGSGSGVFKQLKEDVDLYYTGEMSHHEVLKW
KEMGKTVIVCNHSNTERGFLQDVMKGLLQDEGHEVVVSKMDCDPLTVA
>Q09GP9_BOMMO Q09GP9 GN=LOC767622 NIF3-like protein Species=Bombyx mori
MSTEKFCAVSLERVVTVLEKFAPKELAESWDNTGLLVEPYTPRQITKILLTNDLTEDVAL
EAEILACEMIISYHPPIFAPLKSIVQRSWKERVVSYLLEKRIALYSPHTSWDSVQGGVND
WLASAFSVAESKPILQSNNPDFGAGRLLHLSTGIPLSDAVNRIKELTRLSHVRIAAAKGK
SMTHTVQRVALCAGSGSSVLKGVDADLYLTGEMLHHDVLDAAQKGITVILTNHSDSERGF
LRGFANYLHKNLNEEVEVFVSKVDKDPLITV
>Q0UYL5_PHANO Q0UYL5 GN=SNOG_03149 Uncharacterized protein Species=Phaeosphaeria nodorum (strain SN15 / ATCC MYA-4574 / FGSC 10173)
MKKLYPQALADNSWDNTGLLLEAPFVASRRQSNNVLLTIDLTKAVADEAIALNSSIIIAY
HPIIFRGLKSITLANTQQQTLLRLASHGISVYSPHTAVDSAPGGLGDWLADIVTGTKKAL
SEDDSEAGSSQQGDKPDADDPFIEKKRPAFTLNHHPSQTTLRTAKLPATTATTASVSHTR
RPVKPQSPEIKSHPGAGMGRIVEFSQPQPLPALLDRIGKGLNNPKGFPIAIPQNATISDI
KIRSVGICAGSGGSLLGDLEVDLLFTGEMSHHEALAAIEKGQVVISLFHSNSERGFLAEV
LLAQLEEAVETEWSQVREENIGKEELKDALADEDFEVIVSEVDRDPYGIVVLKPEAE
>Q4CW43_TRYCC Q4CW43 GN=Tc00.1047053511163.30 NGG1 interacting factor 3, putative Species=Trypanosoma cruzi (strain CL Brener)
MASLIRRVMVAMGEIAPLWLADQSWDNVGLLVESPDSNNSGIVLLTVDLTPEVMEECLRH
NVEVIVAYHPPIFTAFKRLTLADPKQKIILQTVRHGASIYSPHTSLDAAKGGINDWLASI
VDSSGACRPIQPCECVNRHGNGGFGGNDNDELSVGIGRLVALHQPKTMATLVNDIKTGLR
IPTVRVSLPHGWSGNTSVHSVAICAGSGSSVFRMIREHVDVLLSGEMGHHEVLAANAKGQ
AVILCEHTNTERGYLEKELLPKLQQKLEKGVRIIVSAEDKDPLVVW
>Q4DC71_TRYCC Q4DC71 GN=Tc00.1047053506777.60 NGG1 interacting factor 3, putative Species=Trypanosoma cruzi (strain CL Brener)
MASLIRRVMVAMGEIAPLWLADQSWDNVGLLVESPDSNNSGIVLLTVDLTPEVMEECLRH
NVEVIVAYHPPIFTAFKRLTLADPKQKIILQTVRHGASIYSPHTSLDAAKGGINDWLASI
VDSSGACRPIQPCECVNRHGNGGFGGNDKDELSVGIGRLVALHQPKTMATLVNDIKTGLR
IPTVRVSLPHGWSGSTSVHSVAICAGSGSSVFRMIREHVDVLLSGEMGHHEVLAANAKGQ
AVILCEHTNTERGYLEKELLPKLQQKLEKGVRIIVSAEDKDPLVVW
>Q4QH67_LEIMA Q4QH67 GN=LMJF_11_0130 NGG1 interacting factor 3-like protein Species=Leishmania major
MALLQRVAQVMQEVAPLSLADHSWDNVGVLLESPAPNKSNAIMLTIDLTPEVMEECLEKN
VEVILAYHPPLFRPVKRLTLQDPKQRIILQAASAGMSIYAPHTSLDAAEGGINDWLASLV
AGDGAYTASPIQPTSSYAPNAAEATKATGMGRLVKLKEEVEFCSMVGSLKQQLGLATVRV
ALPDSWEPSHKVSSVALCAGSGTSVFRLLRLPVHVLLSGEMSHHDVLAATAAGQAVILCE
HTNTERGFLKAVLQRTLQAKLEGTTVLVSDKDSDPLTAW
>Q4WLS6_ASPFU Q4WLS6 GN=AFUA_6G12480 NGG1 interacting factor Nif3, putative Species=Neosartorya fumigata (strain ATCC MYA-4609 / Af293 / CBS 101355 / FGSC A1100)
MTESVTDGFGRLSPLLSLGVYLAVRQLSTMSTTSSPFTRAVVSSMRKLYPESLADKSFDN
TGLLLEAPFHPARRQKNSVLLTIDLTKAVADEAIKRKDSVVVAYHPIIFRGLKSLTLNDT
QQQTLLRLASEGISVYSPHTAVDATPGGMGDWLCDVVTGAIAPSTDSSPPLSASTSQQYS
QPTYPQPRPASITPSSAAPHVRSTIHPSPPPVPEGMESAGMGRLVTFETPQPLTTIVDRI
AQGVGHPGGIPIAIPQTVPVDLIKIRTIGICPGSGSSILMSSGSLPDLLFTGELSHHEAL
SAVERGSVVIALAHSNTERGYLHAVMRQKLAATLKEEWEAQREEGLKALEETFKQGGASV
IGSYEEVYKDPSCAVDVSERDRDPYGIMIRRA
>Q59Q83_CANAL Q59Q83 GN=NIF3 Uncharacterized protein Species=Candida albicans (strain SC5314 / ATCC MYA-2876)
MAYHPFIFRGLKSITHNDPQQRSLIKLIQNKISVYSPHTAVDSAKGGVNDFLVEGITKNQ
KVESSIPIEQDKTDSECGMGRLVKLSKPSKLKNLVSNIKEQLRLDHVQVALSKDGIEHDI
KTIAICAGSGGGVFKGVEADLYYTGELSHHEALFFKESGSSVICCNHSNSERAFLKVIQE
QLKNELNEADQVVISETDKDPFETW
>Q5KCX5_CRYNJ Q5KCX5 GN=CNH02550 Uncharacterized protein Species=Cryptococcus neoformans var. neoformans serotype D (strain JEC21 / ATCC MYA-565)
MGGSPQITPLALIKRVWERIAPLQLAERSWDNVGPIIEAPYPNPSHRQVLLTIDLTPSVC
AEALKHPSLSLIVSYHPPIFRGLKSLTLSDPLQASLLKLSAKGISVFAPHTSLDATPNGI
NTWLIKPFIPISISHDPIIPSDPLESFEGAGMGRIAKLSEPLDIRQAIKMVKDHLSLDFV
QLAEPQPDVRKPIKSVAVCAGSGGSVFKGVEADLLITGEMSHHEILAYVASGTTVILTNH
TNTERPYLSHVLQPWLQEELNKETKDHSNEYGANGGKWEVLVSKADADPLKVV
>Q6CEZ2_YARLI Q6CEZ2 GN=YALI0_B11704g YALI0B11704p Species=Yarrowia lipolytica (strain CLIB 122 / E 150)
MSSKRAVKTIVSSIQKLYPRALADSSWDNTGLLLECPLDTEPEKEKLNVLLTIDLTTSVV
DEAIRNNSGVVMAYHPFIFRGLKSITQSDSQQRSLLRLARAGISVYCPHTAVDAAVGGVN
DFLIDVVSLGKENEASREVCQPVDGVQGQEGAGMGRVVRLKEPITFSELLKRVKTGLGLK
HVQVALTEKHENPEAKISSVAVCAGSGASVLRGVDADVHFTGELGHHEALGLIENGTSAI
VCGHSNTERGYLKTFQTLLTKELKNQHDGEVEVIISQTDKDPLEIV
>Q7Q029_ANOGA Q7Q029 GN=AgaP_AGAP012228 AGAP012228-PA Species=Anopheles gambiae
MLLKTCSTILFHRNILKFGQQSLKTRAMATLPEVVAKLSEFAPENLAEKWDNVGLLVEPR
NNKSSITNILLTIDLTEAVVAEARETGAQMIISYHPPIFAPLKRLTQASWKERIVIDCIR
HDIAIYSPHTSWDNVTNGVNDWLADSLPHADSRPILENPINAAYGAGRLCTVKGEPLSER
DAVQQIVKHTAMDCAMVSFASSGDKNRKVQTYAVCAGSGASVLKGVKADMYITGEMSHHE
VLEATSNGTCVVLLGHSNSERGYLSVFKDILSKRLNGGVTVHVSSSDRDPMKLALRENAN
>Q7S5H9_NEUCR Q7S5H9 GN=NCU06108 UPF0135 protein Species=Neurospora crassa (strain ATCC 24698 / 74-OR23-1A / CBS 708.71 / DSM 1257 / FGSC 987)
MSAVFKIPIRITSRISTKPLALPYKPSILLPGYFRRSYCQNKNNNPTITMTSTLESPQFT
KRVVAAMRALYPEQLADKAWDNVGLLQENIAVAGQDVPQTVLLTNDLTVAVAEEAIRKRA
SVIVSYHPFIFRGLKSVTLADPQQRILLQLAQANIAVYSPHTAVDAAPGGMNDWLADMLD
GHGVETKRSICQPISSSITASLPPAFFNSGYGRLVELGHPVYLGNIIKAYAEGLGGLNHI
MIAAPKDKKVTTIRSVGICAGSGADVLKNCDADMIVTGEMTHHYALALTMKGKVVMTVFH
SNSERKFLKKRLQPQLQAQLEKEGVKHPEVLVSEEDADPFEIWDVRKMPAWAFGKDSE
>Q8SV52_ENCCU Q8SV52 GN=ECU07_0100 Similarity to NGG1-INTERACTING FACTOR 3 Species=Encephalitozoon cuniculi (strain GB-M1)
MSIHEVSKAIDRFASLRRAKTDWDNVGVIVDSGTQDKKILLTIDLTEPVLEECIHLGVKN
VVAYHPIIFKAVKKLGSKESIVIGCIKNGINVFTPHSALDPLMNTYVYNMINSGPFFYKK
NCGPNTSTIGNAIRILKERSGLESFRICLAREHTMESVPEFMHVGVGATFRNVLLKNSIV
ITGEMSHHDLLSCIANGASVILMEHSNSERICLGHISAKLKEELPEYEIFVSKNDKDPVT
IL
>R1DEG7_EMIHU R1DEG7 GN=EMIHUDRAFT_229910 NIF3-like protein Species=Emiliania huxleyi
MRAGNVHLQPFHRVLSASLSRRFPEAIAEAGDTVGLTIDTLRDVERGASALVLLCVDLTE
QVLSEAASARAHFVVTYSPMPHSPFTTLSTDDVLGRIVLGCAKHQIAVHSVHSACDAASG
GVNAWLARSLARGVVRPIVKHPKVADAGQGRVLECDEATPISTVVERLKALLGVRFLRLA
LAAVVAPEALAKAQEFLTVKTVAVGEGATLLRGWTGDLLELESEFADSDWNVLFK
>R1DTR5_EMIHU R1DTR5 GN=EMIHUDRAFT_470649 NIF3-like protein Species=Emiliania huxleyi
MRAGNVHLQPFHRVLSASLSRRFPEAIAEAGDTVGLTIDTLRDVERGASALVLLCVDLTE
QVLSEAASARAHFVVTYSPMPHSPFTTLSTDDVLGRIVLGCAKHQIAVHSVHSACDAASG
GVNAWLARSLARGVVRPIVKHPKVADAGQGRVLECDEATPISTVVERLKALLGVRFLRLA
LAAVVAPEALAKAQEFLTVKTVAVQVGEGATLLRGWTGDLLITSEMSHADVVAANAQNVN
VILTGQSTIERAYLQYLRQELESEFADSDWNVLFKCSTDCNPLSVV
>R4XEK8_TAPDE R4XEK8 GN=TAPDE_004720 Uncharacterized protein Species=Taphrina deformans (strain PYCC 5710 / ATCC 11124 / CBS 356.35 / IMI 108563 / JCM 9778 / NBRC 8474)
MAFTALSAARLATLLQKIYPRQLAGSWDNTGLLLESAYTRVATAQSSLTKILLCIDLTTS
VCDEAINLDGCSHIISYHPIIFSGLKSLTLSNTQQRSLLRLAAAGISVYSPHTSIDAIQG
GVNGMLSDCFRSTGEIKTSKCIEPCKVVPPGFEGAGAGRLITLATPIALDSAIAGIKSSL
SISHVQVARATNKKDDEMIHTIALCAGSGGSVLKGLAADLIFTGELSHHEQLAFVEAGSH
VVLCGHSNTERPFLPSMKRQIEDLCKEEHVQVVVSAADASPFETV
>R9AHY1_WALI9 R9AHY1 GN=J056_003971 Protein NIF3-like protein Species=Wallemia ichthyophaga (strain EXF-994 / CBS 113033)
MATTNAKIVSRAMQRIAPLELADKSWDNVGLLVESPQRNGSGQHVVIVNDLTEKVFDRII
SDNPFVSVVVSYHPPIFKPLKSITTDNPIQRTLLKCISNGISVYSPHTACDAVRGGVNDW
MFTAITGHKTSNAIIPTTSTIDSHHDAGMGRYGTFASPQDPYRNPMRIKEVINHIKSVFN
LDTLQFADGGKKHINSVAVCAGSGSSILSKAPSVDLYVTGEMGHHDVLAAVANGTSVILL
NHSNSERVYLQTSLRDALTEAIQIEREEAKLEPVKWKVTTCVEDKDPLVSV
>T1EDQ3_HELRO T1EDQ3 GN=HELRODRAFT_105066 Uncharacterized protein Species=Helobdella robusta
MFLRDVIEVLEKFAPLSLAAQWDNVGLLVEPDNTSADFIKKIMLTNDLTLNVMKECIDKE
INLIISYHPPIFKPVTRLLQSSWKESVIMSCVKYGIALYSPHTCWDVVENGVNDWLLTPF
KGKKQCLKARERKVYRFTVELPETKLSDDALESGVLSDIWEIYGPISHIKLPNDKKAFTF
VCDEVDLNDAKAKLKGLAVNFHSTFTDVTEITNERLGEGRLMILDQPIRINEAIDIIKKH
LKLDHVLLASSHHLQKKNFNDGYQLISSIAVCAGSGSSVLKGAKANLYITGEMGHHELLD
VTNNTCAPSSVILCNHSNTERGFLSDFMLGYLKGELKDKVEILVSECDVDPLVVV
>T1J2P1_STRMM T1J2P1 GN= Uncharacterized protein Species=Strigamia maritima
MRLLVYLQFVKLTGFHRFCSSLNRITTPETSIKMNLSDVVSQLNRLAPPSLAEKWDNVGL
LVEPSAPHHVEKMLLTNDLTENVLKEALDLKVNLILSYHPPIFAPLKRITSANWKERIVV
RCLENRIAVYSPHTSFDASSDGVNSWLTEAFDVADCKPISPSISTSTPSGFSHKVEALIP
SSVANNPEVNKVLEKLELIMQRPESQNEMEVNFRSTELCPCILTVLCTEAKLPEIAAVLT
SCSQLTKHTQIYKQDKFPIPGHGMGRVCNLKNPISINDAVRLVKHHLNLNFLRVASGVNK
I
>T1KTG7_TETUR T1KTG7 GN= Uncharacterized protein Species=Tetranychus urticae
MLRSLIKLIPHKLSDSRSFGIFKDFSKKTLPLNNTFGFNSINKLPFIQYSNQKRMDVNYP
SLEGVVRLLNEIAPLHLAESWDNVGLLVEPFTQISIGKIVLTIDLTEKVIEEAKTYGTEL
IISYHPPIFHPLKSLNHKTWKERLVLDCIQCGIAVYSPHTALDAIKDGINDWLLSPFNIK
EVRPINQSSMDSRSTNHYSYRLETVLPSESDSKLLERVEKLGKVLRLPSSAVIFSEDKNL
PLIINILSENSSTKASMHLSKLDIPPLPGFGVGRIAQLTFPITLQDVINRTKHLLNLNHV
RLALAPKHSLDSNINSIAVCAGSGGSVLRGLSVDLLITGEMSHHEVLDALYSNGSSVILC
EHTNTERGYLHVLREKLITKLQNPNVEVIVAKSDADPLNIV
>U5HE01_USTV1 U5HE01 GN=MVLG_05355 Uncharacterized protein Species=Microbotryum lychnidis-dioicae (strain p1A1 Lamole / MvSl-1064)
MSSTSAASFSSFSSSSFSTVRSPVLNHLLAAVERLTPLQLAGSWDNVGVMIEAPYPRQEI
KGKKQVLTCIDLTTAVTEEALASSSTAAVLTYHPPIFSGLKSMTLAVPLQASLLRLSTHG
IPVVCIHTASDSSIGGVNDHIASAFTLDLRATSKAIEESKEQPEGHEGCGLGRLVTLDHA
LNKHEVVKRIKHTLNLDHAQAAWAPNGAEKIKTIAICAGSGSSVLSGVKADLYLSGELDH
HATLLCNAKGIHVILTNHSASERPWLKPFAPRLAKAMNEEAGGDAYETKGDGSYVVKDYN
NVQQGYNGLYNNPQHGSEGLLFKDRIYQTLDPLDHHIFPPPPWLPAPEGRWGKLATLASI
IPLISS
>V4A440_LOTGI V4A440 GN=LOTGIDRAFT_142416 Uncharacterized protein Species=Lottia gigantea
MELQQVVSNLKTYAPTSLAGSWDNVGLLVEPSAPHIVKTLFLTNDLTPPVLDEAIEKKAD
MILSYHPPIFSAMKRLRQSVWKERLIVKCIENKIAVYSPHTCFDAKSAGVNDWLISAFEL
SNLAMLNPVPKIGFGGGRVGKLKTPITVSEAVDRIKTHLQLNHIRLAAKPSNKPIQSVAV
CAGSGSSVLRGVRADLYVTGEMSHHDVLDAVYNGANVILCEHSNTERRYLKQVKQELYKT
LTDVSIVISDIDTDPLHIV
>W4XLT5_STRPU W4XLT5 GN=Sp-Nif3l1 NIF3-like protein 1 Species=Strongylocentrotus purpuratus
MDLKRVVSLLEDFAPTSLAGSWDNVGLLVEPTPPHTVSTICLTNDLTEEVLDEAIEKQTD
LILSYHPPIFVPLKRLRQRNVKERIVVRAVEKRIAIYSPHTACDAVEGGVNDWLVEGLGD
TSSNKPLEPCLDVKNGDDFSICVMAPQTDVETVEATLQKMSGAHNVTCIVTNNSNYQITC
SCKKSDLGNILSLVQSRFDVDQASLNITQLTKAPMARTGVGRMATLQAPAPVSTMVKRIK
THLMLEHVQIALGQGKTLDSEISTVGICAGSGSSVLNGLKADMFLTGEMSHHDLLAAVAE
GTTVVVCNHSNTERGYLHVLQGKLTSMCENKIKVFVSEKDRDPLEVV
>W5LNS9_ASTMX W5LNS9 GN= Uncharacterized protein Species=Astyanax mexicanus
MIPGCRIVTRRLFNLRHCLSSLNPSCHPRHLSQSGHCNVSMDLKGVLGVLEQLAPLSLAE
SWDNVGLLVEPSRPRPIKTILLTNDLTSAVMDEAEEMACDLVISYHPPLFRPFKRLLQKD
WKQRLAVRAVEGGIAVFSPHTSWDSAKDGLNDWLIGGLGHGQVSVLSQALCSAPQRHRVE
FTAGSQVELDSILKLLKETENSEAFQYTLLRNEEGGQQVILTCPGSALTPVVQTVLGNVS
TSQSLSITQVQQNPMLGCGQGRHVVLDEPLSVGVAVQKMKTHLGLPHLRLALGEQKTLGK
KIIYFIIYRTL
>W6V706_ECHGR W6V706 GN=EGR_02961 NIF3-like protein Species=Echinococcus granulosus
MEFARLAKKLDHLFKLPLAEPWDNVGLLIQPSVPTFVSRICLTNDLTEPVLNEVTHIGAN
FIISYHPPIFRPLKRLTQSTSKERIIVKCIEHKIAVYSPHTALDAVSGGLNDWLLSPFGN
KLLDRPPTVTTRHDRRFQEYCIRNNIAPINCKAASSNGKLSEAIMSGDALKCQEVEIGDP
LTFLPEEGAGRIGLLKEGYTVNDAVEFYKALLNTSILKVALGYGKTFDSPVTAVAVCAGS
GGSLFSQEAIVQVADLLVTGEASHHEQLEAVARGATIITAGHSVSERGYLSQRLRPWLQH
ELATTSVPIDIASTDAEPGIYVLPPGIQ
>W9CLY3_9HELO W9CLY3 GN=SBOR_2817 Uncharacterized protein Species=Sclerotinia borealis F-4157
MSTASSPFTQAVVTAMRKLYPEKLADSSFDNTGLLLEAPHRENYLKDSVLLTIDLTKGVA
DEAIRRKDSIIVTYHPIIFRPLKAVTLANSQQSSLLRLAQEGISIYSPHTAVDAAPGGLN
DWLADIVTNRPLKKDQSTGTESIDHERSIISSVKDIPNGFEGAGYGRVVRFKQPQKLGDL
VARIQSSLQIEGRISGLSVAVPQSIPRGQKSSIEISSIGICAGSGGSMLNGLDVDLLFTG
ELSHHEALAAVEQGKCAVTAFHSNTERAFLKDRMQAALAEAMEGKADIAVSEVDRDPFDI
VHKDEVNW

## Sheet: b
>A0A0F8V6Y5_9ARCH A0A0F8V6Y5 GN=Lokiarch_52630 Putative GTP cyclohydrolase 1 type 2 Species=Lokiarchaeum sp. GC14_75
MLFHELRSILIYKLSPKKYKFDSEIYGLQYNTKITYKLIKKVMLTIDLSIEALHYALKNK
ISLIISHHGLVNNPINVFNQNLINKLILLNKYPISIFVLNSSFTAAEGGVSDTLANSLYL
NIDNTFEIKNSKGIKVPIGRICTPKNFLNNCQKITLEDLIKRIKINLNLTQIIYVGNLKK
QIKKICLIGGDNSSVKYLKKALKLGCDCFISGKINYFGAIFGRDTGLNLIETSHYEVELL
ALKKLSNILSLEFPYTEFTVFDSGNPFHVFL
>A0A0F8VX49_9ARCH A0A0F8VX49 GN=Lokiarch_50610 GTP cyclohydrolase 1 type 2 homolog Species=Lokiarchaeum sp. GC14_75
MLFQELQSILIYKLSPKKYKLDSEIYGLQYITKSINKLIKKVMLTIDLSIEALHYALKNK
VSLIISHHGLVNNPINIFNQNLINKLILLNKYPISIYVLNSSFTAAEGGVSDTLASSLYL
NIDNTFEIKNNKGTKIPIGRICTPKNYLNNVQKITLEELIKRIKINLNLTHIIYVGNLKK
QIKKICLVGGDSSSVKYLKKALKLGCDCYISGKIDYFDAIFGRETGLSLIETSHYEVEIL
ALKKLSNILSLEFPYTEFTVFDSGNPFHVIL
>A0A135VH87_9ARCH A0A135VH87 GN=AM325_02140 Uncharacterized protein Species=Candidatus Thorarchaeota archaeon SMTZ1-45
MTSLLELIKRLSKLSPKEFSIRGLESRVEIGPQTEKEQANTTINRILVATYPSARVVTKA
TQDKVNLLITYRPLFPFAIDRLSGLDLVRVRLLTKNYISTYVVGSGWLCMRDGLNDALVE
TLGLKKSSDFMTESDFGEPTAIGRVCKPPGVKNQSGFVNYIAGKIGLDSVLFSGDLDDEV
RDLLVIAGSSVDMPEILNAKNQDLDTLITGELSPEIRLLASEEGINTLELGAFATEEPGM
KRLRDVISLDFPEMRVEFTESGPVARALRPYKDDMA
>D3SS59_NATMM D3SS59 GN=Nmag_1203 GTP cyclohydrolase 1 type 2 homolog Species=Natrialba magadii (strain ATCC 43099 / DSM 3394 / CIP 104546 / JCM 8861/ NBRC 102185 / NCIMB 2190 / MS3)
MSMELAAFVDRLDETLDTAAYADLDASANGLQVGPHERTVEHVAFAVDGVQETFEQAIEA
DADVLVTHHGISWGGFDRVTGRTYDRLQPLIEHDLALYVSHLPLDGHQKLGNAAGVADVL
GLENRQPFGELGPEYIGQRGRATDSYTPAELRDQLESTLETGGQPVQVLEFGPDEIEEVG
IITGSGTDWLDEAVEAGVDALVTGEGKQKAYHEAREAGIHVVLAGHYATETFGVRAVRER
VESWDVDLETSYFEVPTGL
>D4GWG2_HALVD D4GWG2 GN=HVO_2298 GTP cyclohydrolase 1 type 2 homolog Species=Haloferax volcanii (strain ATCC 29605 / DSM 3757 / JCM 8879 / NBRC 14742 / NCIMB 2012 / VKM B-1768 / DS2)
MQLSDIVARLDETLATDDFADVDASANGLQVGPGEKSVEKVAFAVDAAEATIDAALDADA
DLLVVHHGLVWGGLDRVTGRDFDRIEPLVRGDLALYVSHLPLDGHQELGNAAGVADHLGL
GDTEPFGSLGPIHIGQAGSFESPQTADEIRAALDELDGSAGTTVLDFGPDEISSVGVVTG
SGVDWLDEAIDRGVDALVTGEGKQKVYHEAREAGVSVFLAGHYATETFGVRSLRDLADEW
GLETEYVSHPTGL
>GCH1L_ARCFU O28497 GN=AF_1777 GTP cyclohydrolase 1 type 2 homolog Species=Archaeoglobus fulgidus (strain ATCC 49558 / VC-16 / DSM 4304 / JCM 9628 / NBRC 100126)
MNLAEVVRFLDDFLEINSYQDVSNNGLQVEGSEEVKKVAFAVDASMESFRAAKAVNADML
VVHHGLIWGGIGYIRGIVKRRIEFLLRSNLSLYAAHLPLDAHREVGNNAVILRKIGAEPQ
EEFGEYKGVKIGFSAKLEKATAVGEIAEKLGPAMVLPFGEERVRKVAAVSGKGCFALNEA
IDAGVELFITGEPEHEAYHLAKEGGINVFFLGHYESEKFGVQSLMEVVREKLGIEAVFLD
IPTNL
>GCH1L_HALSA Q9HP80 GN=VNG_1766C GTP cyclohydrolase 1 type 2 homolog Species=Halobacterium salinarum (strain ATCC 700922 / JCM 11081 / NRC-1)
MDVSDVTSRYNDRLRVTDYADAATNGLQVGPGDRSVERIAFAVDAAAATISDAVEWGADL
LVVHHGVAWGGLDAVTGREYDRIAALVDGECALYAAHLPLDGHPELGNAAHVADVLGLTQ
RSPFGDHSGEQIGLQGQLPDPTSAPALSKSLAAALPTGDQPVQVLDVGPAELTDVAVVTG
SGADWLREAEANGVDALVTGEGKGKLYHEAREAGVSVFLAGHYATETGGVRALEAVADDW
GVETRFISHPTGL
>GCH1L_METJA Q58337 GN=MJ0927 GTP cyclohydrolase 1 type 2 homolog Species=Methanocaldococcus jannaschii (strain ATCC 43067 / DSM 2661 / JAL-1 / JCM 10045 / NBRC 100440)
MKAKEIIEFIETFAPKDLAIEGDNIGLQVGDNLDKEIKKLGIALDPSLSVIKKAEKEGVD
FLFTHHPLLKDPIRNFTGVIYKKLKILMENDIILYSAHTNLDICKNGLNDALAELYNLEN
PKPLYDNGLGRVGIFKGSFEEFLEITKKYIHKNPIVVKSKEVDDNFKLAVLSGYGLSQSS
IKYVAEKADVYLSGDLTHHSKILAEELGLVVVDATHYSTEVFGLKKFKEFLSSNLDLEII
SLDF
>GCH1L_METTH O27214 GN=MTH_1146 GTP cyclohydrolase 1 type 2 homolog Species=Methanothermobacter thermautotrophicus (strain ATCC 29096 / DSM 1053 / JCM 10044 / NBRC 100330 / Delta H)
MITIRIDSLIELMDRVAPPELALPGDRIGYHGPEIEVEAVLVLMDYLEDVAVDGYDLLVL
HHPPEVEPPIPYLTVHSNWDVADGGACDALADALGLDVESFLDPDTGVDRICRADLSLEE
LLERTGVLNPETLRVVNPREYVDRVAVVSGFGLSDKSLIMRAWSEGVSAYLSGDLTHGPA
ILGRNMDLTLIDAGHHATEMPGLHRLREVIEDFGVMAELLDTGTPWSEYRAAYI
>GCH1L_PYRAB Q9UYT3 GN=PYRAB14240 GTP cyclohydrolase 1 type 2 homolog Species=Pyrococcus abyssi (strain GE5 / Orsay)
MEREEIVSFLDEYLSISSYPDKSSNGLQVEGKEEVERIAFAVDACLDTIAKARAFNADML
IVHHGIIWGGVSYVKGLFAKRLKALLSSEMNLYVAHIPLDVHPEVGNNVQLLKLLNLEPL
EPFGEYKGIKIGYIGEFEEPKPLPMIAQILAEKLPVDYVRSYEFGLQEIKRVAVVSGAGG
FAIEEASEKADLLITGEISHADYRTAEDLRVSVIAAGHYATETLGVKALMKLVREKFGVK
TIFIDSPTGL
>Q0W3L4_METAR Q0W3L4 GN=RCIX1843 Uncharacterized protein Species=Methanocella arvoryzae (strain DSM 22066 / NBRC 105507 / MRE50)
MELFDLVKLLEAIAPPDLAEDFDHGKIGLIVPGYHRVNKVATALDPTPFVIERAIDMHAE
AIVVHHTLIWNPVTALTPDMAGVLKLLLENDISLYSMHTNYDRAPGGVNDTLADLLGLKD
TVAVDLCRAGVVETQSLADFAASASRALKVDVEVVGRLNKDVCTIVTAAGSAFREALPIA
KQLNADVLVSSELRHDVIRDRGNVALISAPHYFTEAPAMKRLADVLNSKNVRAEFVDDPP
ELRVIRS
>Q2FPY1_METHJ Q2FPY1 GN=Mhun_0228 Uncharacterized protein Species=Methanospirillum hungatei JF-1 (strain ATCC 27890 / DSM 864 / NBRC 100397 / JF-1)
MKAVELFSRFEQDIPPSYAVPGDQNGYIGTLDPHIFDVQKILVLMDYILPESPNIDYSLY
DLLVLHHPPPISPVIPTYVIHSNWDIVTGGACDALADALNITSFDVLDESTGIGRIGGID
RETEDIITQGRFIHEIMATLRVHDIRTVNCNRFQPVGTICVISGFGLTPPLISKAISKGV
DIVVSGDLTHPGAVLAKNANITLIDATHHATELPGLYRLGEMISSYGLDVQVRNFGIPWT
RSVNRGVRREYDNH
>Q5JIP5_THEKO Q5JIP5 GN=TK1572 GTP cyclohydrolase 1 type 2 homolog Species=Thermococcus kodakarensis (strain ATCC BAA-918 / JCM 12380 / KOD1)
MNRDELVSFLDEYLNISAYPDKSSNGLQVEGNEEVERVAFTVDTTLRTIERAAKAGADMM
VVHHGMIWGGLEYVTGVHYRRLKALIENGLNLYVAHLPLDAHPEVGNNVELLRLLGLEPK
GPFGEYRGLTIGFWGEFEEPQPIEKIAQIVAEKLDTTVRAYEFGKREIKTVGAISGAGAF
ALEEAWRKGIDLLITGEFGHADYLTAVDLPQSVLVAGHYKTETLGVKALMPVLGKKFGLD
VFFIDEPTGL
>Q5V108_HALMA Q5V108 GN=nif3 GTP cyclohydrolase 1 type 2 homolog Species=Haloarcula marismortui (strain ATCC 43049 / DSM 3752 / JCM 8966 / VKM B-1809)
MNAGDIAARLDDRLDIEAYADIDASPNGLQVGPASQPVEHVAFAVDAAVETIDRADEVGA
DLLVTHHGIVWGGMERVTGTNYRRVAPLIDNDLALYVAHLPLDGHQSLGNAAGVADLLDL
NNRAPFGAMGGEYIGQRGTLSEPQTVSELAGSLEGLDTGGQPVQVLDFGPSTVEDVAIVT
GSGVDWLQEAVEADADVLITGEGKQQAFHEAREQGMHVVLAGHYATETFGVQSLQTVVED
LGLETTYIDCPTGL
>Q8TM42_METAC Q8TM42 GN=MA_2828 GTP cyclohydrolase 1 type 2 homolog Species=Methanosarcina acetivorans (strain ATCC 35395 / DSM 2834 / JCM 12185 / C2A)
MELKKIVQILEEIAPPELADDFDKGRIGLILGLESDVKKIAIALDANFYVLKKAAKMKAD
MLITHHTLIFHPVNIISKSLADSLRVALENGISLYSMHTNYDRAEEGINDILAARLGLKN
IRSPEIGRIGEIEPCSSTELATYVSDCLQTPVIYAGEKEEIRKVMVIGGSGFRNEYLELA
RENRVDAFISSELKHDILRAYEDLCLIDASHYATENPGMEALCPRLRSLTGIEVEFIDQP
SGLRTVNCRPKNEEKEPCNQEETGKDSLELMLEKQSRNQIRSDYRRSLGNEYGRRYLE
>Q8TW44_METKA Q8TW44 GN=MK1192 GTP cyclohydrolase 1 type 2 homolog Species=Methanopyrus kandleri (strain AV19 / DSM 6324 / JCM 9639 / NBRC 100938)
MAMVREVIDFVEELAPPDLAEDWDNPGIQVCPPGGLDRKAERVLVALDATHALERAGDAD
LVLTHHPLLFRPPRRIGGRWYRVLRAVLEADAVFYAAHTNLDRAEGGVADTLARRLNLRV
EREACDGFGRLCEVPGSEEELLNALRNLSPLTTVYGDWEGVSRVLVVPGAAPDGLVMECL
RCGVDAVIAGEIKYHTRAELLEEGIAVVELGHEYSELPGVQELARRVREEFRDLNVEVVP
PPDITIIR

## Sheet: c
>A0A0A7S5W8_9GAMM A0A0A7S5W8 GN=FPB0191_00850 GTP cyclohydrolase 1 type 2 homolog Species=Frischella perrara
MHNDDLALILNNFLQVSLFKDYAPNGLQVEGKKQIHRIVTGVTACQRLIDAAVDLNADAV
LVHHGFFWKNEPLTITGIKYKRIKTLIKHDINLYGYHLPLDCHPIVGNNVLLGKMFGVQI
DERTSPTDLLFKGNLTKSKTALELKSLIEEKLQRTVLFCGDDAPEQIKRVAWCSGGGQDF
IEQAALAGCDAFITGEVSERTTHLAREYGINFYAAGHHATERYGICALGEWLAQQYDLDV
TFVDIDNPA
>A0A0C7NHG1_9BACT A0A0C7NHG1 GN=DTL3_0077 Uncharacterized protein Species=Defluviitoga tunisiensis
MMAINIFELENFLNSILKPWDYDDFCHNGIQIEGAHTINKIAVGVSFNEEFISTAIKENC
DLLLVHHGIFGKDFFELKGYLKRRVEKVIKNNLTLMAYHLPLDGHEEYGNNVSILKSLNL
NIKEKVDVTFIGEYEDPILFMDFHKQVEKLFNPQPLLVYQNNKFVKTVGVCSGGGSSFLE
SVENKIDTFITGEVKEQTRNIVAEMGINFINAGHYSTEVFGIKNIGDLIRNSFGIEVEFI
DIYNEI
>A0A0X8JFD6_9ACTO A0A0X8JFD6 GN=AXF14_09895 GTP cyclohydrolase 1 type 2 homolog Species=Actinomyces radicidentis
MTDATTTPSNAGTAGGTEPLTVGDVVDVLREAAPPELAEDWDSNTLICGDPADPVRTVLL
AMDPLTAVVDEAIERGVDMVITHHPLFLRGTDHVGAVDPKGRSVHRLIRAGIALANAHTT
WDSALGGNADALAELLGLTATVPLEPSDADPALGIGRVGILPEPTTLRALAEHVARALPD
TAPGLLVGGDPEAAVERVAVSGGAGDSLLVAARDAGADVFLTADLRHHPASDHLEGGRPY
LLCGTHWATEWVGLPPLARRLEQGAAQRGRTLAAHVSTVVTDPWTLRLSTGS
>A0A146G723_9BACT A0A146G723 GN=TSACC_21946 GTP cyclohydrolase 1 type 2 homolog Species=Terrimicrobium sacchariphilum
MQLRELAAFLNTELRLADIKDYPNAVNGLQVENLGEVSRVAVAVDACEYILRAAVEQGAD
LLIVHHGLFWSGLQPVTGALYRKLKIALEADLAVYSAHLPLDAHPTLGNNALLCDALGLP
PEREPFLDLGWKASLKISREELSDRLARAVGGRVHVAPGGAGTIRSVGVVTGGAGGEVFK
AAQAGVDAFVSGEGPHWSYTAAEECGIDLFYGGHYATETFGVKALGALLESRYGLPWQFI
DHPTGL
>A0L3K9_MAGMM A0L3K9 GN=Mmc1_0023 GTP cyclohydrolase 1 type 2 homolog Species=Magnetococcus marinus (strain ATCC BAA-1437 / JCM 17883 / MC-1)
MANLTEIETHLRNILQCDRIDDYCPNGVQVRGGHNITRVVSGVTACMALFEAAVAVNAQL
IITHHGLFWNKDPRVVEGMLKHRLKLLLEHDITLMGFHLPLDMHPELGNNAQILNRLQLI
AGEPFGVYKGSALSKMGHWEQSLSLDQVQQKLQKLFGGEPLVLPYGPPNIRKVAVCSGGA
PELIHEAVTAGADLFLTGEASEPVYHVAREMGIHFVAAGHHRTEMFGVQAVGERLAQTFS
LEHTFIDIPNPI
>A0LHK1_SYNFM A0LHK1 GN=Sfum_1210 GTP cyclohydrolase 1 type 2 homolog Species=Syntrophobacter fumaroxidans (strain DSM 10017 / MPOB)
MPKVKDVMDWVDAYAPFRFSAGWDRCGLQVGDPEAELSRLLVALDPGSTTLGEALSLKCQ
CVVTHHPLIFQPLESVRADVFPGKLIMTAVREGISLICAHTNLDAARAGTNEQLARVFAL
QGVTPLEIDAAWQDEPRYAGMGCVGELPAEMSLDGLASFAAAAMGGGAVRVVGEPGRSVR
RVAVCTGSGGGLLDAVITGRADVYITGDVKYHDAMRAEEHGLAVIDIGHFSSERVVLQPL
AEYLRSRAVGQEAGLEVFVARREKDPLRIVGSAVEPLSP
>A4FA29_SACEN A4FA29 GN=SACE_1582 GTP cyclohydrolase 1 type 2 homolog Species=Saccharopolyspora erythraea (strain ATCC 11635 / DSM 40517 / JCM 4748 / NBRC 13426 / NCIMB 8594 / NRRL 2338)
MTVRVQDVVAAMEAAYPPELAESWDAVGLVCGDPQAIVQRVLFCVDPVEATVDEAADFGA
QLLISHHPLLLRGVHGVPADDPKGRLVHRMIRAGIGLYCAHTNADSAELGVSDALAAAIG
LTVTGPLDPHSEGARTGLGRIGVLPEPEPFERFVQRVAAGLPTTAWGVRGAGDPQRPVRT
VAVCGGAGDSRLETATAAGVDAYVTADLRHHPAGEHIARGDVPGARVPALVDVAHWASEW
PWCQQAADIVATALPDTVEVLVSTRRTDPWTAHVAGAVSDPGRTLA
>A5EYD5_DICNV A5EYD5 GN=DNO_0852 GTP cyclohydrolase 1 type 2 homolog Species=Dichelobacter nodosus (strain VCS1703A)
MQRDFLVSHLNELLQIRKFRDYAPNGLQIAGRAEIQTVVTAVSASQAAIDFAVANNADAL
LVHHGYFWKGEAAELVGVKRKRIATLLHHEINLLAYHLPLDQHATLGNNALFGQALSAHN
ISQSSFDDFLWQGDIETVSASQWIAAVEKILQRSIIAVGNTQKMIQKIAWCTGAAQDLLL
QAHAEGADAFLTGEYAERSYHEARECDMLFLVCGHHSTETFGVRALGDYLAATQGLKIFF
FDEDNPF
>B1ZWG1_OPITP B1ZWG1 GN=Oter_3636 GTP cyclohydrolase 1 type 2 homolog Species=Opitutus terrae (strain DSM 11246 / JCM 15787 / PB90-1)
MAKLSDLVAYCDRRTRRTAFEDYPGSCNGLQLANRGQVTKIGAAVDAGVIPFQRAVDAEV
DFLIVHHGMYWDMPRPLTGPAYDRVATLINGNCALYSSHLPLDAHPQIGNNALLARQLKL
KLHRGFMPNAGGDVGGIALSRGLSRAALRAKLEKLYPRVIAIEYGSPTPREIAFCSGSGY
SAVSHLAKAGVDTLVTGEVREEIFNRAQEERLNLYLCGHYATEVHAVQALAAEIAKRFRL
PWEFIATDNPL
>B2A1Z5_NATTJ B2A1Z5 GN=Nther_1217 GTP cyclohydrolase 1 type 2 homolog Species=Natranaerobius thermophilus (strain ATCC BAA-1301 / DSM 18059 / JW/NM-WN-LF)
MTTRPAKKTLINLLEKFAPKYLAVEGDNPGLQLGSVNDKVSKCLVALDPSKQVIEQAIKM
KAELIITHHPLFMPPLHVVTDEKIGDVTKRAIKNDISIYTSHTNLDAALEIGVNHALLET
LNINLIDERPLTTTYKEKYSKIVVFMPQGYEDEVRTALSSAGAGSLGHYCDVSFQSQGIG
TFKPLAGTDPFIGEQGRISRTEEVKLETIVPNSKINQVIQEMRAVHPYEEPAYDIYQLEY
PDKKYGIGLVGELSSPIRSETLIETIEQRLHTQVRLAGPRPENINSVAVCGGSGGKMVEK
ALKLGVDAFITGDIKYHDALRAEQEGLFLIDAGHRETELPVVDKVTKFLDEQLSDDYNLE
IKSFHNDEYVFYR
>B2KB36_ELUMP B2KB36 GN=Emin_0233 GTP cyclohydrolase 1 type 2 homolog Species=Elusimicrobium minutum (strain Pei191)
MVTRNSIIDYINDYLGSALIKDASQNGLQVEGRENIRKIVFGVSANLEFFKKAAAAKADM
VITHHGLLWSQNPAVTGIFKKRIEFLIKHDINLASWHLPLDMHAVLGNNAQMVKKLGVKN
IKSFGVYHGVKIGFMGLLPKEMTLKEVESKFAVKPNLVFNFGKSKNKIVAIISGGGYDMF
EQAVDAGADLFITGSSEEFVQEIAREGKINYMALGHYNSEVYGVKALMGLVGKKFKVSTE
FIDVANPI
>B2UL65_AKKM8 B2UL65 GN=Amuc_0007 GTP cyclohydrolase 1 type 2 homolog Species=Akkermansia muciniphila (strain ATCC BAA-835 / Muc)
MSKIELHTAISFLDGILSVNSIPDAPRALNGLQLENGGTVSKVAAAVDGSEKAIHAALET
GADLLLLHHGIFWQPMQPITGIAYRKLKAAMDGNLAIYAAHLPLDVHPAYGNNALLAKAC
GLRPCSHDGLDYHGVSLGTHGEFPGTCAELEQKLETVLGAPVQAFWKDSPEAPAGDIFIC
TGGAGDDLAQAAALGCRTYVTGEGSHWNIPLAQELGVNLVFGGHYFTETFGVKALGLLLK
DVYGLDYTFIDLPPSAYSH
>C1A3J0_GEMAT C1A3J0 GN=GAU_0025 GTP cyclohydrolase 1 type 2 homolog Species=Gemmatimonas aurantiaca (strain T-27 / DSM 14586 / JCM 11422 / NBRC 100505)
METAGASLYEVVAALDSELRTFDVPDYGGAVNGLQVANRGRVHRIATAVDASKASIDMAA
ATGADLLIVHHGLFWSGAQPLVGVRYAKYRTLFERDIAVYASHLPLDLHATLGNNARLAH
ALALTPDAGFARYKTIDIGVAGTANESTADLVARVSHYAAGYGGTVRTSVPVDGRTTKRW
AICTGGGASSETLQEARAKGIDTLIVGEGPHHTTVEAIEHDLCVVYAGHYATETLGVQAV
GAWLMDRFNLPWSFLHLPTGS
>C5CDX0_KOSOT C5CDX0 GN=Kole_0414 GTP cyclohydrolase 1 type 2 homolog Species=Kosmotoga olearia (strain TBF 19.5.1)
MKIFEIENYLNEILEPWNYTDYCYNGIQIEGRHEVKKVAVGVSFNKAFIDHALEERVDML
LVHHGIFGSGFFSLKGYIKRRVEKVIKNDLTLMGYHLPLDAHREYGNNATILKLLGLEPG
EQVEVGYIGEYEEAVSFDDFYKRLKQIFPNQPILKYVNSDFVKKVCVISGGAAGDLRKVE
GKVDTFITGEVKEQTRDEAREMGINFINAGHYATETFGVKNLGKLLEENLGLEVVFIDVW
NEV
>C9RNB8_FIBSS C9RNB8 GN=FSU_0039 GTP cyclohydrolase 1 type 2 homolog Species=Fibrobacter succinogenes (strain ATCC 19169 / S85)
MDLPFMTAWLDDLLDPKSFNDYCVNGLCVEANDKVTRIVTGVSLRDQLIDAAIEEKADCI
IVHHPNGFWKGESQLPVGKFAERLRKLMNNGISVFGFHLPLDGHREIGNNAVIAKLLGLN
PVHEFVHVGMRAIGVIAEWNTPATREEFVDCLDAAFVHGVQNKFFHGPEEIKRVAICSGS
CSASDIKEALEMNCDAYVTGSIKEDIPIFCQENGVNLASCGHHRTEIFGVSALAEKIQAE
LSIPSRFIDLDNPI
>D1BNB3_VEIPT D1BNB3 GN=Vpar_1190 GTP cyclohydrolase 1 type 2 homolog Species=Veillonella parvula (strain ATCC 10790 / DSM 2008 / JCM 12972 / Te3)
MTTVQQIITVMEQLAPRSYAESWDNVGLMVGDRNAVVTGVVTTLDVTEEAVEYAIEQNCN
LIVSHHPLIFKGLKQISCDTAQGRTINKLIQHKIAVYSAHTNLDIAPGGLNDMLAKQLGL
TDIKGFIKTGEEALYKVTTFVPESSADAVRMAMGDAGAGRIGNYEYCSFSTHGEGRFVGN
EDSHPVIGSAGALTVAPEVQVNAIVDGTHLSEVVAAMKSAHPYEEVAYEVLNIVEPTSST
QYLGRVGRLPNALNLDSFREWIQDALPDANIRFAGVAPETIQSIALCSGAGAEFIKDAAR
LHVDAYITGDVKYHEAQMAKELGLLVVDAGHFGTESIVARGLCDYLISVGFTVPVKAFTE
QNDFFFV
>D1C3H2_SPHTD D1C3H2 GN=Sthe_1354 GTP cyclohydrolase 1 type 2 homolog Species=Sphaerobacter thermophilus (strain DSM 20745 / S 6022)
MADRDAIVAFCAEYLEVDRFRDVAVNGLQVQGRDTVNRVATAVSVSQYTIDAALDWGADV
LLVHHGLLWGERTGPIVGPLRERLKRLLAADLNLVAYHLPLDAHPEVGNNHRLAAALDLS
VVAPFAEVQGQPIGVIAEPPEALTVPDLVARLERVTERAPVVLDGHHGPLRRVAVLTGSG
YSALDEAVAAGCDALVTGDVREPTMALARELGITVLAGGHEATERLGVQALGEVLRDRFG
VATRFIPDPNPI
>D2R6E9_PIRSD D2R6E9 GN=Psta_0842 GTP cyclohydrolase 1 type 2 homolog Species=Pirellula staleyi (strain ATCC 27377 / DSM 6068 / ICPB 4128)
MSDHPLSLQDLCLYLEALAPTGLAESWDNVGLLMGDRAQPIARVMTCLTITPASAAEAIE
RQADLVIAHHPLPFRALKRITTDDTVGSLLWNLARHGVAIYSPHTALDSAQQGINAEWSA
RLELTSSQPLVPQTADPLLGAGRSGSLATTETLAQFITRVKRAVKIEHVAYVGQLAQAIT
RVAIACGSAGDFLPIALRAKCDALVTGEVNFHTALEAEARGIALVLVGHYASERFALETL
ATQLQSQFRSLEIWASTHEHDPIAFV
>D2RJF0_ACIFV D2RJF0 GN=Acfer_0814 GTP cyclohydrolase 1 type 2 homolog Species=Acidaminococcus fermentans (strain ATCC 25085 / DSM 20731 / VR4)
METEEMESKETTVTDICLFMNELAPVKYAESWDNPGLLLGHLAQHVHKIMVALDLSPEVA
EQAIEQECDIIITHHPYYFSLPKTLAVTDTKMEVLYELIKHDIALYAAHTNLDAAKGGVN
DVLAARLGLDEVTEIPRKDCPEQGLARIGVLDEPMALKDFAAKVRDDLGAEHLTYAGGDE
PVYKVAVVGGSGADFMEDALAAGADTLVTGDLKYHVAQKALNLGLNVVDGTHQLTESPVV
DKLEQVLQAWCEESGRHFAVIRAEEDRILQTV
>D3EYU5_CONWI D3EYU5 GN=Cwoe_1390 GTP cyclohydrolase 1 type 2 homolog Species=Conexibacter woesei (strain DSM 14684 / JCM 11494 / NBRC 100937 / ID131577)
MAARTDEIVAFLDELLEIERFSDYGPNGLQVPGGETVTTVVTGVSAQLELFERAVDHGAE
LVLAHHGILWDFDPRRIGPAHARRLRTLLAADIALAAYHLPLDAHLEVGNNALLAAGLGA
TRTEPAFAHSGTTIGVVAHFDQDGGVPIEELVARVATLTDRDPLVNAAGPPAVRTLGIVS
GGAAGDISTAIELGLDAFMTGEPKEHVMAQARENGIHFLAAGHYATETFGIRRLGELVAE
RFGVAHRFVDIPNPV
>D3F706_CONWI D3F706 GN=Cwoe_4390 GTP cyclohydrolase 1 type 2 homolog Species=Conexibacter woesei (strain DSM 14684 / JCM 11494 / NBRC 100937 / ID131577)
MTALAEIMTWLDDLLEPGAFKDFGPNGLQVPGREQVVTVVTGVSAHVELLERAIAEDADL
LLVHHGLIWDFQSRRLHRRQARRLRLALEAELNLVMYHLPLDAHPEVGNNALLAGALGAD
AHEAWGRSRGRPLGRMATFAEPVPIAELLARVTRVTDREPLAFTDGPAAVRRLAIMSGGS
ATEFSSAIEAGADAFLTGEPAEHVMADAAEAGVHFIAAGHHATERFGARRVGELLAERFG
VRHTFIDVPNPV
>D9SC25_GALCS D9SC25 GN=Galf_0446 GTP cyclohydrolase 1 type 2 homolog Species=Gallionella capsiferriformans (strain ES-2)
MNLYQLVDYNASVLQTAQFKDYSPNGLQVEGRGEVRRIATAVTASKQVIDESIAWGADAI
LVHHGYFWRNEAPCIVGVKKQRIAELLKHDVSLLAYHLPLDAHAELGNNARLAAALGLRE
QGRFGEQNIACYGALDVSQSLADFALGIESALQRAPLVIGHAGKMLHRAAWCSGGGQGYF
EAAIAQGVDVFVTGEISEQSYHLSRETGVAFISAGHHASERLGIQALGEHLASRFDLEHR
FFDQANPV
>F0S1X0_DESTD F0S1X0 GN=Dester_1420 GTP cyclohydrolase 1 type 2 homolog Species=Desulfurobacterium thermolithotrophum (strain DSM 11699 / BSA)
MVKLRDIIAFLEELVPSELQDKWDNSGLQIGWESQEVEHIGFALSVSKKILEQAKRLKVD
LIITHHPITISGIKSFVNYSYPSHLFLELARNGIAVYSLHTNLDVSSLGPTAIIAEKLEV
QKEATIADNPPYGIIGTLNTALTQKELFKKLTSFLPKDIFRGINYRPDSAVKRIAVCSGS
GASFIDIVAKKVDVYITGDIKYHDALKAQDLGLTVFDMGHYGTERLFFEKLFYLLTQRFN
TLKLTIFEEKSPYEVMRSC
>F2LX24_HIPMA F2LX24 GN=Hipma_1247 GTP cyclohydrolase 1 type 2 homolog Species=Hippea maritima (strain ATCC 700847 / DSM 10411 / MH2)
MEVTRLIDYLEAYFPLSLQEGWDNSGLQISPQESSIKGVLLSLDVNSQTINEAIKLGCNL
IVSHHPLLFSSTKKIFNDFYPYNVLYKAIQKGIGVYAFHTNLDIAEGGLNDYLCNLLELK
DIEIIENKRPLRIGRLNRGLDFEVFVDYVKEKLSCDAIKYIKANDRLIKRVAVCSGSCME
LVYEILDLDFDVFLSGDLKHHTAIFAKESGINVVDATHYHTEKFSKFILKDIIKRKFREL
RVFVSESDYLPWDYR
>F8A8B4_THEID F8A8B4 GN=Thein_0033 GTP cyclohydrolase 1 type 2 homolog Species=Thermodesulfatator indicus (strain DSM 15286 / JCM 11887 / CIR29812)
MAITVEEIIAALESWAPKKLAEDWDNVGLQLGSLKKQVKHLGVCLDLTPETLAQALTQKI
DCLVTHHPFFFKSTKQICWDTWPGKAVKTLAEKDISLIACHTNLDSAKEGVSDVLGEALH
LKVERALLPAKATKLFLITTYVPKGYEEKVREILLKEGAGQRGKYSGCSFATEGIGSFYP
KEEAKPYRGKVGKLNLVSGTKMEFLVPEFLLARVIAKIKEVHPYEEVPIDVWPTEAYDYR
YGLGRIGELPLEYTLYELAQKLSQLLNSQAIFMVGDPKQLVKRVALCGGAGGDFFENALS
LGAEVYITAEVKYHQAREAEARGLSLISVGHFESESLIVPKMAEFFQKMANSKGEELQIT
MLKEKNPFIPLF
>GCH1L_BORBU O51424 GN=BB_0468 GTP cyclohydrolase 1 type 2 homolog Species=Borrelia burgdorferi (strain ATCC 35210 / B31 / CIP 102532 / DSM 4680)
MNVRDLSFKLNSIFDINKYEHIDKNLNGLQVGNINAKVNKVAFAVDASFSTLKEAKGNDF
LITHHGIFWSKKERIVSNMYDKTKFLIENNLALYSVHLPMDAHSVYSHSKVFSDFLGLKN
SFAFANYGGVNLGIIADSVFSFSEILEKIKKENKHILFSKKFKESVNKVAIVSGSGYSFF
EEALCHDVDLFITGDTSHQIYSLAEEFGVNLIFAGHYFTETFGLIKLMEDFKIQEDLEVK
FICKNTNL
>GCH1L_BUCAI P57387 GN=BU301 GTP cyclohydrolase 1 type 2 homolog Species=Buchnera aphidicola subsp. Acyrthosiphon pisum (strain APS)
MNNFLLEDIINKKLLSNQYQDTVPNGLQIEGTEIVKKIITGVTACQALLDKALFYNADTL
IVHHGYFWKNESKYIHNMQRQRLKTILSHNINLYSWHLPLDVHPKLGNNAQIAKKLNIDI
QGSILPYVLWGTTKNKMTGFEFANKIERKFKKYPIHLYENAPLYISRVAWCSGRGQGFIK
KACAFGIDAFLTGEISEETTHIAKELGIHFFSLGHHATEKDGVKSLGEWLQRKYDLCVDF
IDIYNPA
>GCH1L_CHLTR O84110 GN=CT_108 GTP cyclohydrolase 1 type 2 homolog Species=Chlamydia trachomatis (strain D/UW-3/Cx)
MNVSDLLNILNELLHPEYFSDYGPNGLQVGNAQTAIRKVAVAVTADLATIEKAIACEANV
LLVHHGIFWKGMPYSITGILYQRMQRLMEGNIQLIAYHLPLDAHTTIGNNWKVARDLGWE
QLESFGSSQPSLGVKGVFPEMEVHDFISQLSAYYQTPVLAKALGGKKRVSSAALISGGAY
REISEAKNQQVDCFITGNFDEPAWSLAHELAIHFLAFGHTATEKVGPKALAQYLKGAGLE
SVVFLDTDNPF
>GCH1L_CLOAB Q97JI0 GN=CA_C1303 GTP cyclohydrolase 1 type 2 homolog Species=Clostridium acetobutylicum (strain ATCC 824 / DSM 792 / JCM 1419 / LMG 5710 / VKM B-1787)
MSLKVKDLCNIIEDFAPISLKEDFDNVGLMVGDREASVDAIMTALDCTMDVIDEAIEKNC
NMIITHHPILFKKPSKITMDTLLGKKIIKIISNNINVYSAHTNLDSVKDGINDAVVNILG
FDKSSILAKNNKAVKEAGIGRVVELEQNMTLKELCDRVKESFKIQSLRYCGDEDKKIHSF
AVINGSGQDFFEEARKRGVDCIITGDTSYHYVSDYNEMNIAVIDAGHFGTEWPSVVVMSK
KLEGALHKMGINTPILVSQNNIDPYKFK
>GCH1L_DEIRA Q9RY41 GN=DR_0110 GTP cyclohydrolase 1 type 2 homolog Species=Deinococcus radiodurans (strain ATCC 13939 / DSM 20539 / JCM 16871 / LMG 4051 / NBRC 15346 / NCIMB 9279 / R1 / VKM B-1422)
MTVSPSSQTGRGEIGRDELVRWLGEYLRIGAYPDPSLNGLQIQGTDKIRRIAASVDTSLQ
TLQAAAESGADLLLVHHGLFWGRPLAITGPHYERVRTAIQADLNLYAAHIPLDAHPEVGN
NAMIARALSLTDLQPFGDWQGHKIGVAGTLPRELGLQDFADRIQKLTGEICLVHGGGSPN
IHRVGVTSGSGAGAIAEAAAMGLDTLLTGEPEHKYFHDSFEYGVNVIFAGHYETEVFGVR
ALAARIEDEFGIPWQFLNFPTGL
>GCH1L_ECOLI P0AFP6 GN=ybgI GTP cyclohydrolase 1 type 2 homolog Species=Escherichia coli (strain K12)
MKNTELEQLINEKLNSAAISDYAPNGLQVEGKETVQKIVTGVTASQALLDEAVRLGADAV
IVHHGYFWKGESPVIRGMKRNRLKTLLANDINLYGWHLPLDAHPELGNNAQLAALLGITV
MGEIEPLVPWGELTMPVPGLELASWIEARLGRKPLWCGDTGPEVVQRVAWCTGGGQSFID
SAARFGVDAFITGEVSEQTIHSAREQGLHFYAAGHHATERGGIRALSEWLNENTDLDVTF
IDIPNPA
>GCH1L_HAEIN Q57354 GN=HI_0105 GTP cyclohydrolase 1 type 2 homolog Species=Haemophilus influenzae (strain ATCC 51907 / DSM 11121 / KW20 / Rd)
MNNLELEQLINQKLSSDKINDYAPNGLQVEGKTEIKKIITGVTASQALINYAISQNADAI
LVHHGYFWKSETPCIRGMKGKRIKALLVNDINLYGYHLPLDVHPELGNNAQLAKLLDIEN
LQPLEKGSVSIPVWGELKEPMTGKDFAEKIEKVLNRKPLICIENGPHLIRKIGICTGGGQ
GYIDLAAEQGCDAFITGEVSEQTIHSAREQGLYFFSAGHHATERYGIKALGEWLAKEYGF
DVEFKDIDNPA
>GCH1L_NEIMB Q9JXG9 GN=NMB2054 GTP cyclohydrolase 1 type 2 homolog Species=Neisseria meningitidis serogroup B (strain MC58)
MVLCRDFLTWCNETLQTALFKDYAPNGLQVEGREYIGKIVTSVTASRAAIDFAVEQKADL
LLVHHGMFWKNELPTVTGWKKERIAALLRHDINMAGYHLPLDAHPTLGNNAQLADRLGFA
TEKRFGEQNLLNSGSLKQAKTLGALAAHIETVLQRKPVVIGNPEREIRRVAWCSGGAQGF
FQTAIDEGVDLYLTGEISEAQYHLANETGTAFISAGHHATERYGVRALAESAAEVFGLEV
CHFDENNPA
>GCH1L_NOSS1 Q8YS75 GN=alr3216 GTP cyclohydrolase 1 type 2 homolog Species=Nostoc sp. (strain PCC 7120 / SAG 25.82 / UTEX 2576)
MKIADLITWFESWANPAWCESWDNCGWQIEPGILHEEARVLVCLTPTLAVMEEAIALQAN
LIFAHHPLIFSPPKSLRRGEAIADMARLAFTKNIGIYSAHTNFDQVEDGTADVLAQILGL
KDVAPIVPTQGGLGYGRVGLLDPFLNLQELLTVIQTRLAPPDLIFSPTADLQQIISRVAV
LGGSGAGFISAVAETGAEAYLTSDCKFHQFQESRDRGLILIDAGHYATERPACDRLVEKL
RSLNLHWVQLSNQDEDFRQFFVK
>GCH1L_PSEAE Q9HVX2 GN=PA4445 GTP cyclohydrolase 1 type 2 homolog Species=Pseudomonas aeruginosa (strain ATCC 15692 / DSM 22644 / CIP 104116 / JCM 14847 / LMG 12228 / 1C / PRS 101 / PAO1)
MAIALSTLVEEADRYLDAARIQDYCPNGLQVEGRPQVRRIVSGVTASQALLDAAVEADAD
VVLVHHGYFWKGENPCVVGMKQRRLKTLLNNDISLLAYHLPLDLHPEVGNNVQLARQLGF
EVEGPLEPGNPRSIVLLGSLAEPMQPADFARHVRDALGREPLLVDAGQPIRRIAWCTGGA
QGYIDQAIAAGVDAYLTGEVSEQTVHSARENGISFIAAGHHATERYGVQALGDYLGKRFA
IEHLFIDCPNPA
>GCH1L_RALSO Q8XVA0 GN=RSc2931 GTP cyclohydrolase 1 type 2 homolog Species=Ralstonia solanacearum (strain GMI1000)
MDRKELELYLNDLLQAARFRDYCPNGLQVQGRDPIAHIVTGVTASLALIEAAIDVRADAI
LVHHGYFWKGEDARVIGQKHARLKQLLAHDVNLFAYHLPLDAHPTLGNNAQLGALLGIQP
TGRFGDDELGWIGTLPEATTLGAFAEVVAARLDRMPLVIGGADRPVHTIGWCTGGAQGWF
DAAVSAGVDVYLSGEASEQTTHLARESGVAYIGAGHHATERGGVRALGNHLAEHFGVRHT
FIDIPNPV
>GCH1L_SALTY P67270 GN=ybgI GTP cyclohydrolase 1 type 2 homolog Species=Salmonella typhimurium (strain LT2 / SGSC1412 / ATCC 700720)
MKNTELEQLINDKLNSAAISDYAPNGLQVEGKETVQKIVTGVTASQALLDEAVRLQADAV
IVHHGYFWKGESPVIRGMKRRRLKTLLANDINLYGWHLPLDAHPELGNNAQLAALLGITV
KGEIEPLVPWGELSMPVPGLELASWIEARLGRKPLWCGDTGPENVQRVAWCTGGGQSFID
SAARFGVDAFITGEVSEQTIHSAREQGLHFYAAGHHATERGGIRALSEWLNENTALDVTF
IDIPNPA
>GCH1L_STRCO Q9L012 GN=SCO2301 GTP cyclohydrolase 1 type 2 homolog Species=Streptomyces coelicolor (strain ATCC BAA-471 / A3(2) / M145)
MPRLSEVITALDALWPAERAESWDAVGTVVGEPDQEVSRVLFAVDPVQETVDEAVGLGAD
LLVTHHPLYLRGTTTVAASTFKGRVVHTLIKNDIALHVAHTNADTADPGVSDALAGALDL
NVVRPLVPDPSDPEGRRGLGRVCELTHPLTVRELAARAAERLPATAQGIRVAGDPEATVR
TVAVSGGSGDSLFDHVRAAGVDAFLTADLRHHPVSEARAHNPLALLDAAHWATEWPWCEL
GAAQLDEISDRHGWDLRVHVSKTVTDPWTAHVASAPTSSAMGAPN
>GCH1L_TREPA O83942 GN=TP_0977 GTP cyclohydrolase 1 type 2 homolog Species=Treponema pallidum (strain Nichols)
MTARELDAYFRSFLNFGPFVSCDVALNGLQVANSGAPVHKVAFAVDACAQSIDAAARAGA
RMLFVHHGLFWGRIEPLTGMQYRRVQALLTHDIALYAVHLPLDAHPQYGNNAGLAARVGL
RQGGPFGFIRGTAVGLWGTVAENTTPSQEAMQQHAACTAPDTHRVTHANAISPSAGLSLQ
QVVHRLFPAEEQPVRLLPFGKQRIERVGILSGKAGTYLAEAIALDLDLFITGEIEHSCYH
TAREHSISVIAGGHYQTETVGLQLVARKLQRDTGIETLFLDIPTGM
>GCH1L_VIBCH Q9KQA7 GN=VC_2093 GTP cyclohydrolase 1 type 2 homolog Species=Vibrio cholerae serotype O1 (strain ATCC 39315 / El Tor Inaba N16961)
MNNLQLEALLNETLSPQLIKDYCPNGLQVEGKVEVKRIVTGVTASMALIEAAIELKADAL
LVHHGYFWKNEPEAIRGMKGRRIRTLIQNDLNLYAYHLPLDIHPQLGNNAQLAQRLGICV
DGGLEGHPQSVAMFGHFLQPLTGEELAHRIGQVLNRTPLHIAPDQADKLIETVGWCTGGG
QDYIELAASRGLDAFISGEISERTTYSAREQSIHYFSAGHHATERYGIKALGEWLAENHG
FDVTFIDIDNPV
>GCH1L_YERPE Q8ZD91 GN=YPO2697 GTP cyclohydrolase 1 type 2 homolog Species=Yersinia pestis
MRNVELETVLNNQLNIGAFQDYAPNGLQVEGRRDIQRVVTGVTASQALLDAAVAHQADAI
LVHHGYFWKNEPVVVRGMKRNRLKTLLTHDINLYGYHLPLDAHPELGNNAQLAKLLEIQV
LGEIESLLPYGEFTTPLNAVALRERLEKQLGRSVLHCGDRAPAEVRRIAWCTGGGQGYIQ
QAAEFGVDAFITGEVSEQTIHIAREMKVNFYAAGHHATERYGIKALGEWLAEQYQLDVTF
IDIPNPA
>I0I6M2_CALAS I0I6M2 GN=CLDAP_28700 GTP cyclohydrolase 1 type 2 homolog Species=Caldilinea aerophila (strain DSM 14535 / JCM 11387 / NBRC 104270 / STL-6-O1)
MQRAELVSYLDTYLRIHDFRDYGPQGLQIEGRNEVNKIVGAVDAQMPCVEAALSRGADLL
LVHHGIFWGPPQRLVGSFGALVRMYLTAGLNLYAAHLALDAHPVVGNNAELARRLGLTIE
GMFAPVNGTPIGVIAIAPDGVKFDYLVDRFEQNVGPVRLVQAHGPRISHKIGILSGAGAR
EIPTAATLGCDTFLTGETSHAEFYAAQNAGINVIYGGHYTTETVGVQALGQHLQEQFNIE
FEFVDLPTGL
>K9U8J0_9CYAN K9U8J0 GN=Chro_5581 GTP cyclohydrolase 1 type 2 homolog Species=Chroococcidiopsis thermalis PCC 7203
MKISDLINWFENWANPAWQESWDNSGWQIEPGVLEQPARVLVCLTPTLAVMQEAIALQKS
GIPVNLIFAHHPLIFSPLKSLCSGNAIADMTRLAFRHHIGVYTAHTNFDQVADGTADVLA
QLLHLKQVAPIVPTQPELGYGRVGEINPSCTLQELLQQIQTVLNPPDLIFSPTVDLQKTI
ERVAVLGGSGASFISDVVKTGAQAYLTSDCKFHQFQESRDRGLILIDAGHYATERPACDR
LVTKLQTAGVEWAQLSQQDEDFRLFYKR
>M1MA08_9PROT M1MA08 GN=ST1E_0242 GTP cyclohydrolase 1 type 2 homolog Species=Candidatus Kinetoplastibacterium galatii TCC219
MMKYITSQVLSDWLNSVLNPEKYKDYCPNGLQIEGKERIYHIALGVTACELFLQKAIDSN
ADAVIVHHGLLWENDNLSITGIKRRRIELCLSNNLNVFAYHLPLDDHPEVGNNITLGTLL
GFRNIRKNIKNNSMLWLGNSKNLYNMKDLNTVISNKLNRSALLIGDPKKNIKNIVWCSGG
GQKMFQEAIDIGADVYVTGEISESVVHIARETNTGYICAGHHATERYGIQALGNVLKKTF
DIEIEYIEIDNPV
>Q1H4Q4_METFK Q1H4Q4 GN=Mfla_0262 GTP cyclohydrolase 1 type 2 homolog Species=Methylobacillus flagellatus (strain KT / ATCC 51484 / DSM 6875)
MKLIELIDYTGQFLEIERFRDYCPNGLQVQGRSEVGKLVTGVTASLTLLEAANRAGADAI
LVHHGYFWRNESPVVTGIKHARLKFLLQHDISLLAYHLPLDAHQTLGNNARLGQIMGAEL
EGWAGEQNLIAYGRLPVETTLGAFSDTLSNQLRRSPQVLGDPQKKVRRIAWCSGGAQGYF
ETAIGLGVDLYISGEISEPTFHLARETGVAYIAAGHHATERYGVAALGAHLAEKFALAHE
FIDIENQI
>Q1QVE7_CHRSD Q1QVE7 GN=Csal_2210 GTP cyclohydrolase 1 type 2 homolog Species=Chromohalobacter salexigens (strain DSM 3043 / ATCC BAA-138 / NCIMB 13768)
MSARHDMIAAIETELRPGAFKDYTLNGLQVEGREDVTRVMSGVTACQALLDEAVAWNADL
LLVHHGYFWKNEPVEVTGMKRRRLATLLAHDINLLAYHLPLDAHATLGNNVQLARRLDIT
AQGCLDGEPGEGLLWHGTLPTMDHTAFARLIESRLGRSPLVINGHSRPLKRVAWCTGGAQ
DMLPLAAQAGVDAFISGEISERTTHLAREMGVSYFAAGHHATERDGVRALGDWLASRFAL
EHRFVDIDNPA
>Q31GY8_THICR Q31GY8 GN=Tcr_0990 GTP cyclohydrolase 1 type 2 homolog Species=Thiomicrospira crunogena (strain XCL-2)
MKTMELVKYLDDFLEATTFKDYAPNGLQVEGKSDITKIVTGVTACQALIDAAIAEKADAI
IVHHGYFWKNEPVTITGMKQKRIRSLLESEISLLGYHLPLDAHPTLGNNAMLGELWSLED
ITPEPGLVRLGRLSSPVSIDTFIESVGNSLNRMPLHLPGGPSEVETVAWCSGGAQGYIEK
AIEWGADVYISGEVSEQTTHQALENQIHYLAAGHHATERLGVKALGEHLAQAFDLEVVFI
DIENPV
>Q47AN2_DECAR Q47AN2 GN=Daro_3370 GTP cyclohydrolase 1 type 2 homolog Species=Dechloromonas aromatica (strain RCB)
MKLEELVDYLDGLLVPGKFRDYCPNGLQVEGCSEITRVVAGVTASQALLDAAIERHADAI
LVHHGYFWKGEDGRVTGIRRQRLASLLANDINLLAYHLPLDAHPELGNNARLARLLGFLP
EGRFGEQDIAWLGALAEPCDLPSLVSRVAGVLGRQPLVVGGGDRLIRRIGWCSGGAQGYF
EQAIALGVDAYLSGEISEQTVHLARESKVAYLAAGHHATERYGVQALAEHLSQQFGIACE
FVDLDNPV
>Q5SHX4_THET8 Q5SHX4 GN=TTHA1606 GTP cyclohydrolase 1 type 2 homolog Species=Thermus thermophilus (strain HB8 / ATCC 27634 / DSM 579)
MDRDELVRYLDAYLRIQDFPQDPSLNGLQVEGKRTVRKVGAAVDAGEAIFRKALEEEVDF
LIVHHGLFWGKPFPIVGHHKRRLETLFQGGINLYAAHLPLDAHEEVGNNFVLARELGLVD
LTPWDVGVKGRFPQPTPLLQVADRLGQLTGMQPLVHQGGLDHVETVILVSGSGTGLLPKV
DADLFVTGEPKHSVFHETFERGLNVIYAGHYDTETFGVKALAAHLEARFGLPWVFLDHPT
GL
>Q5ZX84_LEGPH Q5ZX84 GN=lpg0848 GTP cyclohydrolase 1 type 2 homolog Species=Legionella pneumophila subsp. pneumophila (strain Philadelphia 1 / ATCC 33152 / DSM 7513)
MITRDELSLFLLDFLNCSQYQDYAPNGIQVEGKDKIKRICTAVSASEDVISQAIEQQADA
LLVHHGYFWKGENPVISGMKRRRIAKLLGHNMNLFAYHLPLDCHPELGNNASLANLLLIG
SHEMHKVNNTANLLWSGKLSKAMNSEQFSSFLEHKLGRYPVHIAGNEKMIHSIAWCTGAA
QDFIEEAYQLGVDAYLSGEVSERTFYQAMELGIQYFSCGHHATERFGIQSLGVYLANYFD
LEHWFIDSPNPI
>Q609U6_METCA Q609U6 GN=MCA1131 GTP cyclohydrolase 1 type 2 homolog Species=Methylococcus capsulatus (strain ATCC 33009 / NCIMB 11132 / Bath)
MALTRSALERFLAGLLNPGAFADYGPNGLQVEGREEIRRIAFAVSATAHSIAAAAEWQAD
ALIVHHGLFWKFHGARPLVGPFARRVFPLVRQAINLFAYHLPLDAHPEIGNAAVLGHRIG
LGEQAPFGDHQGCPTGVRGRLRESLPASALRERLAEILEHPVLLATPDATAPVCTIGIIT
GGANGGWAEAAKAGLDAYITGEMSEHDWHEAQEAGIHMYAGGHNATERFGIQALMERIGR
DLEVECRFIPSANPA
>Q7W078_BORPE Q7W078 GN=BP0279 GTP cyclohydrolase 1 type 2 homolog Species=Bordetella pertussis (strain Tohama I / ATCC BAA-589 / NCTC 13251)
MKTIHIRELADWLDGALQAARFKDYCPNGLQVEGKAEIAHIITGVTASEALLRAAIERGA
DAVLVHHGWFWRNEDRRVLGPRRTRLALALGHELNLLAYHLPLDAHPQWGNNAQLARVLG
LQAETGPDGAPRTCGADNLVWLGSAPGVQTVAQLQQRVAERLGRTPLVVGEPDRPVRRVA
WCTGGAQGMLADAVDAGADAYITGEASESTVHLARETGVAFVGAGHHATERYGVQALGEA
VARQFGIRVEFIDIDNPV
>Q82UH6_NITEU Q82UH6 GN=NE1509 GTP cyclohydrolase 1 type 2 homolog Species=Nitrosomonas europaea (strain ATCC 19718 / CIP 103999 / KCTC 2705 / NBRC 14298)
MHQNMLENYLNDLLGIQQFRDYCPNGLQVEGRTSIQTLVSGVTASQALIQAAVGLRADAI
IVHHGYFWRGEDACLRGMKRHRIATLIKHDINLYAYHLPLDAHTELGNNTQLGKKLGIVE
AGRFGEQNIAAYGHFPESVSLDELSNLLNSVLGRKPLIIGDPLKPVRRVAWCTGAAQSYF
EEAIRLGVDIFITGEISEQNVHTARESGTAFISAGHHATERYGIQALGEHLSQKFSIAHH
FIEVENPV
>Q8DNY4_STRR6 Q8DNY4 GN=spr1462 GTP cyclohydrolase 1 type 2 homolog Species=Streptococcus pneumoniae (strain ATCC BAA-255 / R6)
MLASEVIQAYEAFCPQEFSMEGDSCGLQIGTLDKGIQRVMVALDIREETVAEAIEKGVDL
IIVKHAPIFRPIKDLLASRPQNQIYIDLIKHDIAVYVSHTNIDIVENGLNDWFCQMLGIE
ETTYLQETGPERGIGRIGNIQPQTFWELAQQVKQVFDLDSLRMVHYQENDLQKPISRVAI
CGGSGQSFYKDALAKGADVYITGDIYYHTAQDMLSDGLLALDPGHYIEVLFVEKIAALLT
QWKEKKGWELEILPSQASTNPFRHI
>Q8EDX0_SHEON Q8EDX0 GN=ybgI GTP cyclohydrolase 1 type 2 homolog Species=Shewanella oneidensis (strain MR-1)
MTRTELTQYLADFLRVSAFKDYAPNGLQVEGKAEIRTIVTGVTACQALIDEAIRLKADAI
LVHHGFFWKSEPEVITGMKQRRIKALLAHDINLFGYHLPLDAHPMLGNNATLGRKLGILD
AEAVEDVAQGLVWRGKLDLPMSASEFAAMLAEVLGRDPLHIGESSDEIQYLAWCTGGAQD
YIDVAASLGVDAFISGEVSERTYHSAVEQGIHYYAAGHHATERFGIEALGRHLAREFNLV
HHFVDITNPV
>S6B174_9PROT S6B174 GN=SCD_n00600 GTP cyclohydrolase 1 type 2 homolog Species=Sulfuricella denitrificans skB26
MELCKLEAYTGQLMDADQFHDYCPNGVQVEGRPEVFRLVSGVTASLDLLKAAIGVGADAI
LVHHGYFWKNEDARIAGVKRARIEFLLRHNVSLLAYHLPLDAHPVLGNNAQLAQKLGFEV
EGRFGEQSIACHGALTDELPLCGLEERVTRVLGRAPLIIGEGDTPVRRIAWCSGAAQGYF
EEAIRLGVDAFLTGEISEQCVHLAREAGVAFIAAGHHATERYGVQALGAHLAQQFGISHQ
FIDIDNPV
