# Supplementary material for: Comparative Genomic Analysis of the DUF34 Protein Family Suggests Role as a Metal Ion Chaperone or Insertase
Source: Preprints.org preprint supplement (doi:10.20944/preprints202107.0280.v1), 2021-07-13
Supplement: Supplementary file 8 [file Data Table 5.xlsx]

## Sheet: Content
Data Table 5		Reed et al., 2021
a.1	[COG0327] Exported COG data
a.2	[COG3323] Exported COG data
a.3	[KOG4131] Exported COG data
a.4	[arCOG04454] Exported COG data
b.1	[COG0327] Duplicates determined from exported COG data; shared taxonomic identifiers were used to determine paralog status; subsequent searches of sequences using UniProt, NCBI were used to determine whether duplicate COG-derived sequences may be paralogs
b.2	[COG3323] Duplicates determined from exported COG data; shared taxonomic identifiers were used to determine paralog status; subsequent searches of sequences using UniProt, NCBI were used to determine whether duplicate COG-derived sequences may be paralogs
b.3	[KOG4131] Duplicates determined from exported COG data; shared taxonomic identifiers were used to determine paralog status; subsequent searches of sequences using UniProt, NCBI were used to determine whether duplicate COG-derived sequences may be paralogs
b.4	[arCOG04454] Duplicates determined from exported COG data; shared taxonomic identifiers were used to determine paralog status; subsequent searches of sequences using UniProt, NCBI were used to determine whether duplicate COG-derived sequences may be paralogs
c	Final dataset of suspected paralogs; all homologs and their paralogs checked by tax ID in UniProt; if necessary, (fusion, truncation, atypical domain organization) sequences were checked with CDD search; at least one case required BLAST confirmation
d	Counts per subgroup relative to each organism (counts of data presented in Data Table 4, c)
e.1	Count data (Data Table 5, d) formatted with tax IDs for facilitating tree mapping (Figure 5)
e.2	Categorical key for mapping of Data Table 5, e.1
f	Brief analysis of subgroup distribution of sequences
g.1	Paralog occurrence for organisms featured in Figure 5
g.2	Brief analysis of paralog occurrence (Data Table 5, g.1)

## Sheet: a.1
EggNog ID	Gene Name	Organism	tax ID	Aliases
439292.Bsel_2341	Bsel_2341	[Bacillus] selenitireducens	439292	aliases:D6XW90_BACIE,D6XW90,ADH99844.1,PROTEIN OF UNKNOWN FUNCTION DUF34,BSEL_2341,GTP CYCLOHYDROLASE 1 TYPE 2 HOMOLOG,WP_013173266.1,INTERPRO:IPR002678,ADH99844,BSE:BSEL_2341,GI:297143087,297143087,IPR002678
483218.BACPEC_00983	EEC57998.1	[Bacteroides] pectinophilus	483218	aliases:EEC57998.1,217991994,EEC57998,INTERPRO:IPR002678,GI:217991994,DINUCLEAR METAL CENTER PROTEIN, YBGI FAMILY,BACPEC_00983,B7AQM6_9FIRM,B7AQM6,WP_008120055.1,IPR002678
593907.Celgi_1367	Celgi_1367	[Cellvibrio] gilvus	593907	aliases:WP_013883405.1,GI:336104067,GTP CYCLOHYDROLASE 1 TYPE 2 HOMOLOG,INTERPRO:IPR017221,CELGI_1367,INTERPRO:IPR002678,PROTEIN OF UNKNOWN FUNCTION DUF34,336104067,AEI11886.1,IPR017221,AEI11886,F8A331_CELGA,IPR002678,F8A331,CGA:CELGI_1367
1128398.Curi_c18000	AFS78807.1	[Clostridium] acidurici	1128398	aliases:NIF3-LIKE PROTEIN,GTP CYCLOHYDROLASE 1 TYPE 2 HOMOLOG,WP_014967943.1,K0B159,GI:407050762,K0B159_CLOA9,407050762,AFS78807,CAD:CURI_C18000,CURI_C18000,AFS78807.1
1121296.JONJ01000014_gene324	1121296.JONJ01000014_gene324	[Clostridium] aminophilum	1121296	aliases:JONJ01000014_GENE324,DINUCLEAR METAL CENTER PROTEIN, YBGI/SA1388 FAMILY,A0A1I0IIS1_9FIRM,SAMN04487771_10864,WP_074650723.1,A0A1I0IIS1
1391646.AVSU01000053_gene933	1391646.AVSU01000053_gene933	[Clostridium] bifermentans	1391646	aliases:A0A1X2JKA6,A0A1X2JKA6_PARBF,AVSU01000053_GENE933,GTP CYCLOHYDROLASE 1 TYPE 2 HOMOLOG,B2H97_01725
411902.CLOBOL_00094	EDP19627.1	[Clostridium] bolteae	411902	aliases:CLOBOL_00094,EDP19627,INTERPRO:IPR002678,A8RGB2,A8RGB2_CLOBW,158441930,EDP19627.1,IPR002678,WP_002566794.1,GI:158441930
411902.CLOBOL_01994	EDP17753.1	[Clostridium] bolteae	411902	aliases:WP_002564701.1,GI:158440005,158440005,EDP17753.1,CLOBOL_01994,A8RMR0,EDP17753,A8RMR0_CLOBW,INTERPRO:IPR002678,IPR002678
742733.HMPREF9469_00426	EHF00668.1	[Clostridium] citroniae	742733	aliases:G5HCW4,GI:354816079,354816079,EHF00668,G5HCW4_9FIRM,WP_007858683.1,HMPREF9469_00426,EHF00668.1
720554.Clocl_2110	Clocl_2110	[Clostridium] clariflavum	720554	aliases:GTP CYCLOHYDROLASE 1 TYPE 2 HOMOLOG,DINUCLEAR METAL CENTER PROTEIN, YBGI/SA1388 FAMILY,AEV68706.1,CLOCL_2110,INTERPRO:IPR002678,359825933,WP_014255285.1,AEV68706,CCL:CLOCL_2110,G8LWN8_CLOCD,GI:359825933,G8LWN8,IPR002678,IPR017221,INTERPRO:IPR017221
742735.HMPREF9467_03259	EHG30255.1	[Clostridium] clostridioforme	742735	aliases:EHG30255.1,ADH76_29285,GI:355383169,HMPREF9467_03259,A0A227L9A3_9FIRM,A0A227L9A3,355383169,NIF3-LIKE DINUCLEAR METAL CENTER HEXAMERIC PROTEIN,EHG30255,WP_002587688.1
500633.CLOHIR_00232	EEA86090.1	[Clostridium] hiranonis	500633	aliases:EEA86090,WP_006439153.1,INTERPRO:IPR002678,210155084,GI:210155084,DINUCLEAR METAL CENTER PROTEIN, YBGI FAMILY,B6FWI3_9FIRM,B6FWI3,EEA86090.1,CLOHIR_00232,IPR002678
553973.CLOHYLEM_06560	EEG73275.1	[Clostridium] hylemonae	553973	aliases:GI:225160656,INTERPRO:IPR002678,C0C399,DINUCLEAR METAL CENTER PROTEIN, YBGI FAMILY,225160656,C0C399_9FIRM,CLOHYLEM_06560,WP_006443917.1,EEG73275,EEG73275.1,IPR002678
999413.HMPREF1094_03333	ENY85640.1	[Clostridium] innocuum	999413	aliases:WP_002608990.1,GI:480641172,N9V4U4,480641172,HMPREF1094_03333,N9V4U4_CLOIN,YBGI/FAMILY DINUCLEAR METAL CENTER PROTEIN,26149778,ENY85640.1,ENY85640
999413.HMPREF1094_00659	ENY88208.1	[Clostridium] innocuum	999413	aliases:26147143,N9WX86_CLOIN,ENY88208.1,HMPREF1094_00659,GI:480643786,N9WX86,480643786,ENY88208,WP_002606358.1
999413.HMPREF1094_00661	ENY88210.1	[Clostridium] innocuum	999413	aliases:480643788,ENY88210.1,HMPREF1094_00661,26147145,N9VCA2,WP_002606360.1,ENY88210,GI:480643788,N9VCA2_CLOIN
999413.HMPREF1094_01829	ENY87438.1	[Clostridium] innocuum	999413	aliases:ENY87438,N9WV00_CLOIN,HMPREF1094_01829,GI:480643006,ENY87438.1,480643006,N9WV00,WP_002607519.1,26148303
1291050.JAGE01000001_gene3117	1291050.JAGE01000001_gene3117	[Clostridium] josui	1291050	aliases:JAGE01000001_GENE3117
428125.CLOLEP_02680	EDO61068.1	[Clostridium] leptum	428125	aliases:A7VVR8,156867696,INTERPRO:IPR002678,CLOLEP_02680,EDO61068,DINUCLEAR METAL CENTER PROTEIN, YBGI FAMILY,EDO61068.1,A7VVR8_9FIRM,WP_003531926.1,GI:156867696,IPR002678
1121324.CLIT_11c01760	KDR95147.1	[Clostridium] litorale	1121324	aliases:GI:649361206,PUTATIVE GTP CYCLOHYDROLASE 1 TYPE 2,GTP CYCLOHYDROLASE 1 TYPE 2 HOMOLOG,CLIT_11C01760,KDR95147.1,A0A069RLU5_PEPLI,KDR95147,649361206,WP_038265149.1,A0A069RLU5
1408823.AXUS01000004_gene135	1408823.AXUS01000004_gene135	[Clostridium] mangenotii	1408823	aliases:AXUS01000004_GENE135
1408823.AXUS01000004_gene134	1408823.AXUS01000004_gene134	[Clostridium] mangenotii	1408823	aliases:AXUS01000004_GENE134
537013.CLOSTMETH_03329	EEG29216.1	[Clostridium] methylpentosum	537013	aliases:224948007,EEG29216,GI:224948007,WP_006356100.1,C0EHC9,DINUCLEAR METAL CENTER PROTEIN, YBGI FAMILY,INTERPRO:IPR002678,CLOSTMETH_03329,EEG29216.1,C0EHC9_9FIRM,IPR002678
588581.Cpap_0418	Cpap_0418	[Clostridium] papyrosolvens	588581	aliases:IPR002678,325985285,EGD46124.1,INTERPRO:IPR002678,WP_004621778.1,F1THC1,GI:325985285,PROTEIN OF UNKNOWN FUNCTION DUF34,F1THC1_9FIRM,EGD46124,CPAP_0418
1121333.JMLH01000015_gene2398	1121333.JMLH01000015_gene2398	[Clostridium] saccharogumia	1121333	aliases:JMLH01000015_GENE2398
610130.Closa_2188	Closa_2188	[Clostridium] saccharolyticum	610130	aliases:CSH:CLOSA_2188,ADL04766,ADL04766.1,WP_013272853.1,D9R2B6,302197195,INTERPRO:IPR002678,GI:302197195,D9R2B6_CLOSW,PROTEIN OF UNKNOWN FUNCTION DUF34,CLOSA_2188,IPR002678
411468.CLOSCI_00746	EDS08433.1	[Clostridium] scindens	411468	aliases:B0NBC5,B0NBC5_CLOSV,GI:167664303,CLOSCI_00746,INTERPRO:IPR002678,EDS08433.1,167664303,DINUCLEAR METAL CENTER PROTEIN, YBGI FAMILY,EDS08433,IPR002678
1292035.H476_1079	H476_1079	[Clostridium] sordellii	1292035	aliases:EPZ57596.1,A0A0M1UUG1_PAESO,GI:529073552,GTP CYCLOHYDROLASE 1 TYPE 2 HOMOLOG,A0A0M1UUG1,529073552,NIF3-RELATED PROTEIN,PSOR:RSJ16_07070,AUN13994,H476_1079,JGS6382_11721,EPZ57596
428126.CLOSPI_01866	EDS74282.1	[Clostridium] spiroforme	428126	aliases:GI:169292149,B1C3P8_9FIRM,B1C3P8,WP_004610349.1,INTERPRO:IPR002678,EDS74282,169292149,CLOSPI_01866,DINUCLEAR METAL CENTER PROTEIN, YBGI FAMILY,EDS74282.1,IPR002678
1121334.KB911069_gene1538	1121334.KB911069_gene1538	[Clostridium] sporosphaeroides	1121334	aliases:KB911069_GENE1538
1121335.Clst_0764	Cst_c08000	[Clostridium] stercorarium	1121335	aliases:L7VM31_CLOSH,CSS:CST_C08000,DINUCLEAR METAL CENTER PROTEIN,TIGRFAM:TIGR00486,PF01784,472398647,TIGR00486,L7VM31,CLST_0764,AGC67802,CST_C08000,GTP CYCLOHYDROLASE 1 TYPE 2 HOMOLOG,GI:472398647,WP_015358494.1,PFAM:PF01784,AGI38846,AGI38846.1
1511.CLOST_1753	CLOST_1753	[Clostridium] sticklandii	1511	aliases:CONSERVED PROTEIN OF UNKNOWN FUNCTION,CST:CLOST_1753,308825835,E3PSL9,E3PSL9_ACESD,CBH21873,CBH21873.1,GI:308825835,CLOST_1753
742740.HMPREF9474_01491	EGA94698.1	[Clostridium] symbiosum	742740	aliases:323402367,WP_004462014.1,EGA94698,EGA94698.1,HMPREF9474_01491,E7GKP6,E7GKP6_CLOSY,GI:323402367
742741.HMPREF9475_01484	EGB19351.1	[Clostridium] symbiosum	742741	aliases:EGB19351,HMPREF9475_01484,EGB19351.1,A0A174CJG9_CLOSY,GI:323503525,METAL-BINDING PROTEIN,DINUCLEAR METAL CENTER PROTEIN, YBGI FAMILY,323503525,WP_003507643.1,A0A174CJG9,ERS852479_00803
1195236.CTER_2238	CTER_2238	[Clostridium] termitidis	1195236	aliases:WP_004625819.1,GI:474477917,S0FTM5,INTERPRO:IPR002678,S0FTM5_9FIRM,CTER_2238,474477917,DINUCLEAR METAL CENTER PROTEIN, YBGI/SA1388 FAMILY,IPR002678,EMS71838,EMS71838.1
1121344.JHZO01000004_gene1462	1121344.JHZO01000004_gene1462	[Clostridium] viride	1121344	aliases:JHZO01000004_GENE1462
1298920.KI911353_gene2450	1298920.KI911353_gene2450	[Desulfotomaculum] guttoideum	1298920	aliases:KI911353_GENE2450
633697.EubceDRAFT1_0371	EIM56229.1	[Eubacterium] cellulosolvens	633697	aliases:EUBCEDRAFT1_0371,DINUCLEAR METAL CENTER PROTEIN, YBGI/SA1388 FAMILY,389311296,INTERPRO:IPR002678,I5AR06,I5AR06_EUBCE,WP_004602368.1,EIM56229.1,IPR002678,GI:389311296,EIM56229
1408436.JHXY01000011_gene1579	1408436.JHXY01000011_gene1579	[Eubacterium] cellulosolvens	1408436	aliases:JHXY01000011_GENE1579
864565.HMPREF0379_1012	EFM39264.1	[Eubacterium] yurii	864565	aliases:304551301,E0QJ14,GI:304551301,HMPREF0379_1012,EFM39264,WP_005366064.1,DINUCLEAR METAL CENTER PROTEIN, YBGI FAMILY,EFM39264.1,E0QJ14_9FIRM
1469607.KK073768_gene2113	1469607.KK073768_gene2113	[Scytonema hofmanni]	1469607	aliases:KK073768_GENE2113
592010.GCWU000182_000206	ESK66516.1	Abiotrophia defectiva	592010	aliases:W1Q5P6,GI:554772077,ESK66516.1,INTERPRO:IPR002678,W1Q5P6_ABIDE,WP_023390864.1,ESK66516,GCWU000182_000206,DINUCLEAR METAL CENTER PROTEIN, YBGI FAMILY,554772077,IPR002678
1120917.AQXM01000034_gene1161	1120917.AQXM01000034_gene1161	Acaricomes phytoseiuli	1120917	aliases:AQXM01000034_GENE1161
329726.AM1_2900	AM1_2900	Acaryochloris marina	329726	aliases:AM1_2900,WP_012163335.1,ABW27899,158306282,B0CBB4,AMR:AM1_2900,ABW27899.1,B0CBB4_ACAM1,GI:158306282
509191.AEDB02000002_gene1240	509191.AEDB02000002_gene1240	Acetivibrio cellulolyticus	509191	aliases:AEDB02000002_GENE1240
931626.Awo_c24290	Awo_c24290	Acetobacterium woodii	931626	aliases:GTP CYCLOHYDROLASE 1 TYPE 2 HOMOLOG,AWO:AWO_C24290,AWO_C24290,AFA49186.1,GI:375303052,AFA49186,H6LDM2_ACEWD,H6LDM2,375303052,WP_014356786.1
574087.Acear_0402	Acear_0402	Acetohalobium arabaticum	574087	aliases:AAR:ACEAR_0402,302203271,ACEAR_0402,ADL11949.1,GI:302203271,WP_013277395.1,D9QUP0,D9QUP0_ACEAZ,ADL11949
574087.Acear_0695	Acear_0695	Acetohalobium arabaticum	574087	aliases:GTP CYCLOHYDROLASE 1 TYPE 2 HOMOLOG,D9QVH6,302203557,AAR:ACEAR_0695,D9QVH6_ACEAZ,GI:302203557,PROTEIN OF UNKNOWN FUNCTION DUF34,ACEAR_0695,WP_013277681.1,ADL12235,ADL12235.1
1009370.ALO_13794	ALO_13794	Acetonema longum	1009370	aliases:GTP CYCLOHYDROLASE 1 TYPE 2 HOMOLOG,WP_004096725.1,EGO63333,GI:337274830,F7NKZ0,EGO63333.1,ALO_13794,337274830,F7NKZ0_9FIRM
477184.KYC_07346	KYC_07346	Achromobacter arsenitoxydans	477184	aliases:EHK67017,NGG1P INTERACTING FACTOR 3 FAMILY PROTEIN,H0F3X8_9BURK,EHK67017.1,GI:359365314,WP_008160473.1,H0F3X8,359365314,KYC_07346
1003200.AXXA_11450	AXXA_11450	Achromobacter insuavis	1003200	aliases:338781739,GI:338781739,AXXA_11450,F7T0N5_9BURK,NGG1P INTERACTING FACTOR 3 FAMILY PROTEIN,EGP46119.1,F7T0N5,EGP46119
1156919.QWC_12878	QWC_12878	Achromobacter piechaudii	1156919	aliases:QWC_12878,J4J7S6,J4J7S6_9BURK,WP_006224526.1,NGG1P INTERACTING FACTOR 3 FAMILY PROTEIN,GI:400198233,EJO31194.1,400198233,EJO31194
742159.HMPREF0004_0872	EFF77693.1	Achromobacter piechaudii	742159	aliases:HMPREF0004_0872,D4X657,WP_006216823.1,GI:292818651,DINUCLEAR METAL CENTER PROTEIN, YBGI FAMILY,292818651,EFF77693,D4X657_9BURK,EFF77693.1
1532557.JL37_15260	JL37_15260	Achromobacter sp.	1532557	aliases:A0A095UX91,687288109,WP_043545052.1,GI:687288109,METAL-BINDING PROTEIN,A0A095UX91_9BURK,KGD93342,JL37_15260,KGD93342.1
762376.AXYL_00176	AXYL_00176	Achromobacter xylosoxidans	762376	aliases:E3HQJ6_ACHXA,WP_013390937.1,NGG1P INTERACTING FACTOR 3 FAMILY PROTEIN,ADP13536.1,ADP13536,310758087,GI:310758087,AXYL_00176,AXY:AXYL_00176,E3HQJ6
1216976.AX27061_0182	AHC44650.1	Achromobacter xylosoxidans	1216976	aliases:AHC44650.1,566048977,AXN:AX27061_0182,29507215,METAL-BINDING PROTEIN,ERS451415_00181,WP_058207202.1,A0A0D6FGJ3_ALCXX,A0A0D6FGJ3,AHC44650,GI:566048977,HYPOTHETICAL PROTEIN YBGI,AX27061_0182
591001.Acfer_0814	Acfer_0814	Acidaminococcus fermentans	591001	aliases:ADB47202,ADB47202.1,D2RJF0,INTERPRO:IPR002678,GI:283952399,283952399,AFN:ACFER_0814,PROTEIN OF UNKNOWN FUNCTION DUF34,ACFER_0814,D2RJF0_ACIFV,IPR002678
568816.Acin_0949	Acin_0949	Acidaminococcus intestini	568816	aliases:AIN:ACIN_0949,AEQ22178,ACIN_0949,WP_009015645.1,G4Q677,GI:350278988,G4Q677_ACIIR,AEQ22178.1,350278988
639030.JHVA01000001_gene2313	639030.JHVA01000001_gene2313	Acidobacteria bacterium	639030	aliases:JHVA01000001_GENE2313
278963.ATWD01000001_gene3334	278963.ATWD01000001_gene3334	Acidobacteriaceae bacterium	278963	aliases:ATWD01000001_GENE3334
278963.ATWD01000001_gene3335	278963.ATWD01000001_gene3335	Acidobacteriaceae bacterium	278963	aliases:ATWD01000001_GENE3335
278963.ATWD01000002_gene271	278963.ATWD01000002_gene271	Acidobacteriaceae bacterium	278963	aliases:ATWD01000002_GENE271
1267533.KB906737_gene1770	1267533.KB906737_gene1770	Acidobacteriaceae bacterium	1267533	aliases:KB906737_GENE1770
1267534.KB906757_gene1131	1267534.KB906757_gene1131	Acidobacteriaceae bacterium	1267534	aliases:KB906757_GENE1131
1267535.KB906767_gene1614	1267535.KB906767_gene1614	Acidobacteriaceae bacterium	1267535	aliases:KB906767_GENE1614
1267535.KB906767_gene4679	1267535.KB906767_gene4679	Acidobacteriaceae bacterium	1267535	aliases:KB906767_GENE4679
351607.Acel_0900	Acel_0900	Acidothermus cellulolyticus	351607	aliases:GTP CYCLOHYDROLASE 1 TYPE 2 HOMOLOG,INTERPRO:IPR002678,IPR001412,ACEL_0900,117648571,GI:117648571,ACE:ACEL_0900,INTERPRO:IPR001412,PROTEIN OF UNKNOWN FUNCTION DUF34,WP_011719736.1,ABK52673.1,IPR002678,A0LTB3,A0LTB3_ACIC1,ABK52673
397945.Aave_1059	Aave_1059	Acidovorax citrulli	397945	aliases:A1TL18_ACIAC,AAVE_1059,120588216,GI:120588216,ABM31656,PROTEIN OF UNKNOWN FUNCTION DUF34,A1TL18,INTERPRO:IPR002678,ABM31656.1,AAV:AAVE_1059,IPR002678
535289.Dtpsy_0749	Dtpsy_0749	Acidovorax ebreus	535289	aliases:221729408,B9MDX4_ACIET,IPR002678,DTPSY_0749,WP_012655735.1,INTERPRO:IPR002678,DIA:DTPSY_0749,ACM32228,PROTEIN OF UNKNOWN FUNCTION DUF34,GI:221729408,B9MDX4,ACM32228.1
1268622.AVS7_02913	AVS7_02913	Acidovorax sp.	1268622	aliases:AVS7_02913,A0A0A1VHY8,GI:524556577,GAD23153,GAD23153.1,524556577,A0A0A1VHY8_9BURK,WP_020229060.1
232721.Ajs_0786	Ajs_0786	Acidovorax sp.	232721	aliases:ABM41030.1,WP_011804235.1,A1W455,GI:120605290,INTERPRO:IPR002678,A1W455_ACISJ,AJS:AJS_0786,AJS_0786,120605290,PROTEIN OF UNKNOWN FUNCTION DUF34,ABM41030,IPR002678
358220.C380_04485	C380_04485	Acidovorax sp.	358220	aliases:407895407,ACK:C380_04485,AFU44616.1,C380_04485,AFU44616,GI:407895407,K0I6R4_9BURK,K0I6R4
1276756.AUEX01000035_gene2245	1276756.AUEX01000035_gene2245	Acidovorax sp.	1276756	aliases:AUEX01000035_GENE2245
470.IX87_08080	AIL78589.1	Acinetobacter baumannii	470	aliases:675329069,CAT78_15415,A0A219CC12_ACIBA,METAL-BINDING PROTEIN,CEJ63_06410,A0A219CC12,GI:675329069,AIL78589,A7A65_08125,ABW:BL01_08830,AIL78589.1,B9X91_27545,IX87_08080,NIF3-LIKE DINUCLEAR METAL CENTER HEXAMERIC PROTEIN,AIA51915,CHH39_18025,WP_001284925.1
1217648.F933_03006	F933_03006	Acinetobacter beijerinckii	1217648	aliases:ENW03610,GI:480064739,N9F8J9,YBGI/FAMILY DINUCLEAR METAL CENTER PROTEIN,29858134,480064739,ENW03610.1,WP_005062565.1,N9F8J9_9GAMM,F933_03006
106648.BBLJ01000021_gene3084	106648.BBLJ01000021_gene3084	Acinetobacter bereziniae	106648	aliases:A0A0A8THB7,WP_009586002.1,BBLJ01000021_GENE3084,METAL-BINDING PROTEIN,NDM229_14870,A0A0A8THB7_ACIBZ
1217715.F994_01164	F994_01164	Acinetobacter bohemicus	1217715	aliases:34392887,ENU20109.1,N8QFQ1_9GAMM,F994_01164,479868394,N8QFQ1,GI:479868394,YBGI/FAMILY DINUCLEAR METAL CENTER PROTEIN,ENU20109,WP_004651486.1
1120925.F941_01123	F941_01123	Acinetobacter bouvetii	1120925	aliases:33093068,N9CBV7,N9CBV7_9GAMM,ENV83312,F941_01123,YBGI/FAMILY DINUCLEAR METAL CENTER PROTEIN,GI:480043994,WP_005008781.1,ENV83312.1,480043994
1217652.F954_02610	ENV46623.1	Acinetobacter brisouii	1217652	aliases:480004662,F954_02610,GI:480004662,ENV46623.1,YBGI/FAMILY DINUCLEAR METAL CENTER PROTEIN,ENV46623
871585.BDGL_001834	ADY82420.1	Acinetobacter calcoaceticus	871585	aliases:11640022,ADY82420.1,SERYL-TRNA SYNTHETASE,YP_004996102,GI:325122897,F0KJ93,F0KJ93_ACICP,325122897,BDGL_001834,YP_004996102.1,ADY82420,ACC:BDGL_001834,WP_014207257.1
202952.BBLI01000001_gene43	F960_02447	Acinetobacter gerneri	202952	aliases:WP_004863947.1,N8ZI33,BBLI01000001_GENE43,N8ZI33_9GAMM,YBGI/FAMILY DINUCLEAR METAL CENTER PROTEIN,F960_02447
1217656.F964_01999	F964_01999	Acinetobacter guillouiae	1217656	aliases:479973085,N8Y7L4_ACIGI,WP_004819680.1,GI:479973085,ENV17289,34385877,YBGI/FAMILY DINUCLEAR METAL CENTER PROTEIN,N8Y7L4,F964_01999,ENV17289.1
1217658.F987_01257	F987_01257	Acinetobacter gyllenbergii	1217658	aliases:GI:554748219,WP_016540531.1,F987_01257,V2UEZ0_9GAMM,554748219,ESK53223.1,YBGI/FAMILY DINUCLEAR METAL CENTER PROTEIN,ESK53223,V2UEZ0,23002794
1331660.L313_1695	L313_1695	Acinetobacter haemolyticus	1331660	aliases:APR70701,L313_1695,523907099,GI:523907099,EPR89169,AHL:AHTJS_10150,HYPOTHETICAL PROTEIN YBGI,EPR89169.1
1341679.P253_00300	P253_00300	Acinetobacter indicus	1341679	aliases:P253_00300,GI:554744395,554744395,ESK49450,ESK49450.1,V2ULD6,YBGI/FAMILY DINUCLEAR METAL CENTER PROTEIN,WP_016659985.1,V2ULD6_9GAMM
575586.HMPREF0016_01312	EEY96621.1	Acinetobacter johnsonii	575586	aliases:D0SBT9_ACIJO,WP_005400489.1,EEY96621.1,262315582,D0SBT9,EEY96621,DINUCLEAR METAL CENTER PROTEIN, YBGI FAMILY,HMPREF0016_01312,GI:262315582
40215.BBOS01000003_gene904	L292_1333	Acinetobacter junii	40215	aliases:AJN:BVL33_12420,BBOS01000003_GENE904,WP_004912317.1,S7WGR1_ACIJU,S7WGR1,APU49246,L292_1333
575588.ACPN01000056_gene2286	575588.ACPN01000056_gene2286	Acinetobacter lwoffii	575588	aliases:HMPREF0017_01170,WP_004279653.1,D0SV46,D0SV46_ACILW,ACPN01000056_GENE2286,DINUCLEAR METAL CENTER PROTEIN, YBGI FAMILY
1046625.AFQY01000005_gene1792	1046625.AFQY01000005_gene1792	Acinetobacter lwoffii	1046625	aliases:AFQY01000005_GENE1792
981327.F925_01696	P800_00486	Acinetobacter lwoffii	981327	aliases:GI:480086570,V2Q920,WP_004279653.1,V2Q920_ACILW,ENW25028.1,ENW25028,P800_00486,F925_01696,YBGI/FAMILY DINUCLEAR METAL CENTER PROTEIN,480086570
1392540.P256_00108	P256_00108	Acinetobacter nectaris	1392540	aliases:ESK41120.1,YBGI/FAMILY DINUCLEAR METAL CENTER PROTEIN,ESK41120,GI:554735976,WP_023271713.1,P256_00108,V2TZ48_9GAMM,554735976,V2TZ48
436717.AOLE_05310	AOLE_05310	Acinetobacter oleivorans	436717	aliases:298699394,ACD:AOLE_05310,PUTATIVE HYDROLASE-OXIDASE,ADI89959,ADI89959.1,D8JFM8_ACISD,D8JFM8,GI:298699394,WP_013197196.1,AOLE_05310
575589.HMPREF0018_00579	EEY87832.1	Acinetobacter radioresistens	575589	aliases:262299920,HMPREF0018_00579,DINUCLEAR METAL CENTER PROTEIN, YBGI FAMILY,GI:262299920,EEY87832,EEY87832.1
421052.F945_02556	F945_02556	Acinetobacter rudis	421052	aliases:S3MVI3_9GAMM,F945_02556,EPF71527,GI:514091425,YBGI/FAMILY DINUCLEAR METAL CENTER PROTEIN,514091425,WP_016656956.1,EPF71527.1,S3MVI3
487316.BBNM01000007_gene2919	487316.BBNM01000007_gene2919	Acinetobacter soli	487316	aliases:BEN76_07195,31754993,ASOL:BEN76_07195,A0A1P8EHZ4_9GAMM,BBNM01000007_GENE2919,NIF3-LIKE DINUCLEAR METAL CENTER HEXAMERIC PROTEIN,WP_076032706.1,A0A1P8EHZ4,APV35818
1217712.F971_03453	F971_03453	Acinetobacter sp.	1217712	aliases:N8UUA9,F971_03453,479944755,N8UUA9_9GAMM,GI:479944755,YBGI/FAMILY DINUCLEAR METAL CENTER PROTEIN,ENU90985.1,WP_004773631.1,ENU90985
525244.HMPREF0023_1439	EEH69072.1	Acinetobacter sp.	525244	aliases:EEH69072,EEH69072.1,226836689,HMPREF0023_1439,DINUCLEAR METAL CENTER PROTEIN, YBGI FAMILY,WP_008940952.1,C0VJX0,GI:226836689,C0VJX0_9GAMM
62977.ACIAD1347	ACIAD1347	Acinetobacter sp.	62977	aliases:GI:49530503,CAG68215.1,INTERPRO:IPR002678,49530503,UNIPROTKB/TREMBL:Q6FCJ5,WP_004925739.1,CAG68215,ACIAD1347,Q6FCJ5,Q6FCJ5_ACIAD,IPR002678,ACI:ACIAD1347
1509403.GW12_18530	GW12_18530	Acinetobacter sp.	1509403	aliases:WP_034586909.1,A0A0A3X2E0,INTERPRO:IPR002678,GW12_18530,KGT47108,KGT47108.1,712286394,YBGI/FAMILY DINUCLEAR METAL CENTER PROTEIN,IPR002678,GI:712286394,A0A0A3X2E0_9GAMM
575564.HMPREF0014_00997	EEX00759.1	Acinetobacter sp.	575564	aliases:260407283,AJB47622,A0A0R1BVU2_ACINO,EEX00759.1,METAL-BINDING PROTEIN,ANO:RR32_05705,HMPREF0014_00997,YBGI/FAMILY DINUCLEAR METAL CENTER PROTEIN,A0A0R1BVU2,GI:260407283,EEX00759,WP_001284925.1,APC94_07285
1144672.F966_04045	F966_04045	Acinetobacter sp.	1144672	aliases:WP_004808461.1,F966_04045,ENV08180,ENV08180.1,479963492,YBGI/FAMILY DINUCLEAR METAL CENTER PROTEIN,N8XM78_9GAMM,GI:479963492,N8XM78
520709.F985_01975	ENU43262.1	Acinetobacter sp.	520709	aliases:ENU43262.1,GI:479893403,ENU43262,479893403,YBGI/FAMILY DINUCLEAR METAL CENTER PROTEIN,F985_01975
40373.F991_01709	F991_01709	Acinetobacter sp.	40373	aliases:ENU30314,ENU30314.1,479879310,N8R9W4,F991_01709,WP_004670548.1,YBGI/FAMILY DINUCLEAR METAL CENTER PROTEIN,N8R9W4_9GAMM,GI:479879310
1217703.F904_00232	F904_00232	Acinetobacter sp.	1217703	aliases:ENW97394,ENW97394.1,N9N5T9_9GAMM,GI:480160558,F904_00232,N9N5T9,YBGI/FAMILY DINUCLEAR METAL CENTER PROTEIN,480160558,WP_005183729.1
1217705.F900_00809	F900_00809	Acinetobacter sp.	1217705	aliases:N9M3Y7_9GAMM,GI:480166511,WP_005215297.1,N9M3Y7,ENX03219,ENX03219.1,YBGI/FAMILY DINUCLEAR METAL CENTER PROTEIN,F900_00809,480166511
1217710.F969_01633	F969_01633	Acinetobacter sp.	1217710	aliases:GI:479953968,ENU99451.1,N8VHK8,WP_004782757.1,ENU99451,N8VHK8_9GAMM,F969_01633,YBGI/FAMILY DINUCLEAR METAL CENTER PROTEIN,479953968
1217714.F975_02126	F975_02126	Acinetobacter sp.	1217714	aliases:ENU80369,F975_02126,ENU80369.1,WP_004753358.1,479933082,N8VCE4,YBGI/FAMILY DINUCLEAR METAL CENTER PROTEIN,GI:479933082,N8VCE4_9GAMM
1029823.AFIE01000096_gene2824	1029823.AFIE01000096_gene2824	Acinetobacter sp.	1029823	aliases:AFIE01000096_GENE2824
1144664.F973_01894	F973_01894	Acinetobacter sp.	1144664	aliases:YBGI/FAMILY DINUCLEAR METAL CENTER PROTEIN,F973_01894,ENU85674.1,N8VST9_9GAMM,N8VST9,ENU85674,479938935,WP_004761573.1,GI:479938935
981223.AIED01000026_gene3529	981223.AIED01000026_gene3529	Acinetobacter sp.	981223	aliases:AIED01000026_GENE3529
1217708.F887_02544	F887_02544	Acinetobacter sp.	1217708	aliases:ENX41061,ENX41061.1,N9RFB0_9GAMM,F887_02544,GI:480205265,N9RFB0,YBGI/FAMILY DINUCLEAR METAL CENTER PROTEIN,480205265,WP_005295707.1
1217713.F993_00668	F993_00668	Acinetobacter sp.	1217713	aliases:YBGI/FAMILY DINUCLEAR METAL CENTER PROTEIN,F993_00668,WP_004652713.1,N8QRA4,ENU24427,ENU24427.1,479873014,GI:479873014,N8QRA4_9GAMM
466088.CL42_08300	CL42_08300	Acinetobacter sp.	466088	aliases:GI:612173654,A0A031LR08,CL42_08300,EZQ10256,METAL-BINDING PROTEIN,WP_035267018.1,612173654,A0A031LR08_9GAMM,EZQ10256.1
202954.BBNK01000002_gene257	I593_01821	Acinetobacter tandoii	202954	aliases:R9AXK9,WP_016166896.1,BBNK01000002_GENE257,I593_01821,R9AXK9_9GAMM,YBGI/FAMILY DINUCLEAR METAL CENTER PROTEIN
202955.BBND01000010_gene2394	F990_02811	Acinetobacter tjernbergiae	202955	aliases:V2V070,WP_018678631.1,V2V070_9GAMM,BBND01000010_GENE2394,YBGI/FAMILY DINUCLEAR METAL CENTER PROTEIN,F990_02811
202956.BBNL01000001_gene1655	202956.BBNL01000001_gene1655	Acinetobacter towneri	202956	aliases:BBNL01000001_GENE1655,NIF3-LIKE DINUCLEAR METAL CENTER HEXAMERIC PROTEIN,BJN41_04770,WP_070154075.1,A0A1E8E1W8_9GAMM,31751869,A0A1E8E1W8
981336.F944_01650	F944_01650	Acinetobacter ursingii	981336	aliases:GI:480036367,ENV76179,ENV76179.1,WP_004989895.1,N9D0A6_9GAMM,N9D0A6,29771954,F944_01650,YBGI/FAMILY DINUCLEAR METAL CENTER PROTEIN,480036367
1191460.F959_01370	F959_01370	Acinetobacter venetianus	1191460	aliases:GI:479995339,N8ZVP9_ACIVR,N8ZVP9,WP_004878537.1,ENV37849,ENV37849.1,YBGI/FAMILY DINUCLEAR METAL CENTER PROTEIN,479995339,F959_01370
103372.F4X187	G5I_12046	Acromyrmex echinatior	103372	aliases:NIF3-LIKE PROTEIN 1,PUTATIVE GTP CYCLOHYDROLASE 1 TYPE 2 OS=ACROMYRMEX ECHINATIOR GN=G5I_12046 PE=3 SV=1,G5I_12046,F4X187,F4X187_ACREC
65497.JODV01000001_gene3445	65497.JODV01000001_gene3445	Actinoalloteichus cyanogriseus	65497	aliases:JODV01000001_GENE3445
1120931.KB893931_gene1098	1120931.KB893931_gene1098	Actinobacillus capsulatus	1120931	aliases:KB893931_GENE1098
591023.AM202_0077	AM202_0077	Actinobacillus minor	591023	aliases:B9CVV1,223017716,WP_005817716.1,AM202_0077,B9CVV1_9PAST,GI:223017716,EEF16123,EEF16123.1
637911.AM305_09491	EER47102.1	Actinobacillus minor	637911	aliases:WP_005824015.1,EER47102,EER47102.1,240296466,AM305_09491,C5S1Z9_9PAST,GI:240296466,C5S1Z9
416269.APL_0625	APL_0625	Actinobacillus pleuropneumoniae	416269	aliases:A3MZZ1,ABN73727,4849628,APL:APL_0625,GI:126096899,WP_009875423.1,126096899,ABN73727.1,APL_0625,A3MZZ1_ACTP2
228399.appser1_6890	EFM85762.1	Actinobacillus pleuropneumoniae	228399	aliases:WP_005596897.1,GI:306853544,306853544,EFM85762.1,E0E7J9_ACTPL,EFM85762,E0E7J9,APPSER1_6890
339671.Asuc_1068	Asuc_1068	Actinobacillus succinogenes	339671	aliases:GI:150840463,ASUC_1068,A6VN87,WP_012072811.1,ABR74434,PROTEIN OF UNKNOWN FUNCTION DUF34,ASU:ASUC_1068,150840463,INTERPRO:IPR002678,A6VN87_ACTSZ,ABR74434.1,IPR002678
696748.ASU2_03935	ASU2_03935	Actinobacillus suis	696748	aliases:K0GB44_ACTSU,WP_014991521.1,GI:407388432,AFU18925,ASU2_03935,K0GB44,ASI:ASU2_03935,AFU18925.1,407388432
1504319.GM45_0205	GM45_0205	actinobacterium acAMD-5	1504319	aliases:GM45_0205,684290201,A0A094RX60,GI:684290201,KGA09813.1,A0A094RX60_9ACTN,KGA09813
1229203.KI301992_gene706	1229203.KI301992_gene706	actinobacterium LLX17	1229203	aliases:KI301992_GENE706
883066.HMPREF9233_00082	EKU95994.1	Actinobaculum massiliae	883066	aliases:EKU95994,HMPREF9233_00082,425733188,K9EFH7,EKU95994.1,K9EFH7_9ACTO,YBGI/FAMILY DINUCLEAR METAL CENTER PROTEIN,WP_007000300.1,GI:425733188
883067.HMPREF9237_00988	EPD27051.1	Actinobaculum schaalii	883067	aliases:512026914,GI:512026914,S2VJS0,EPD27051,HMPREF9237_00988,YBGI/FAMILY DINUCLEAR METAL CENTER PROTEIN,S2VJS0_9ACTO,EPD27051.1,WP_016442611.1,AIE82122,ASG:FB03_01245
1227261.HMPREF0043_01905	ERH16394.1	Actinobaculum sp.	1227261	aliases:HMPREF0043_01905,WP_021601800.1,GI:541472998,541472998,U1Q2G5_9ACTO,DINUCLEAR METAL CENTER PROTEIN, YBGI FAMILY,INTERPRO:IPR002678,U1Q2G5,IPR002678,ERH16394,ERH16394.1
1120933.ATUY01000001_gene776	1120933.ATUY01000001_gene776	Actinobaculum urinale	1120933	aliases:ATUY01000001_GENE776
390989.JOEG01000001_gene5339	390989.JOEG01000001_gene5339	Actinocatenispora sera	390989	aliases:JOEG01000001_GENE5339
1120934.KB894441_gene5660	1120934.KB894441_gene5660	Actinokineospora enzanensis	1120934	aliases:KB894441_GENE5660
909613.UO65_0829	UO65_0829	Actinokineospora sp.	909613	aliases:WP_035278847.1,583004419,EWC63855,W7ISE8_9PSEU,GI:583004419,W7ISE8,HYPOTHETICAL PROTEIN YBGI,UO65_0829,EWC63855.1
1120936.KB907211_gene210	1120936.KB907211_gene210	Actinomadura atramentaria	1120936	aliases:KB907211_GENE210
561175.KB894097_gene218	561175.KB894097_gene218	Actinomadura flavalba	561175	aliases:KB894097_GENE218
1394178.AWOO02000110_gene5747	1394178.AWOO02000110_gene5747	Actinomadura madurae	1394178	aliases:AWOO02000110_GENE5747,A0A1I4Z694_9ACTN,A0A1I4Z694,DINUCLEAR METAL CENTER PROTEIN, YBGI/SA1388 FAMILY,SAMN04489713_10268
888050.HMPREF9004_1529	ENO17619.1	Actinomyces cardiffensis	888050	aliases:ENO17619,NIF3-LIKE PROTEIN,478775969,WP_005963998.1,N6WBN3,HMPREF9004_1529,GI:478775969,ENO17619.1,N6WBN3_9ACTO
525245.HMPREF0044_1225	EEH63508.1	Actinomyces coleocanis	525245	aliases:EEH63508.1,HMPREF0044_1225,DINUCLEAR METAL CENTER PROTEIN, YBGI FAMILY,C0W1D5_9ACTO,C0W1D5,WP_006546395.1,EEH63508,226831125,GI:226831125
1120941.AUBL01000042_gene1615	1120941.AUBL01000042_gene1615	Actinomyces dentalis	1120941	aliases:AUBL01000042_GENE1615
883069.HMPREF9238_01707	EPD29390.1	Actinomyces europaeus	883069	aliases:S2VTF1,HMPREF9238_01707,S2VTF1_9ACTO,GI:512029343,YBGI/FAMILY DINUCLEAR METAL CENTER PROTEIN,EPD29390.1,512029343,EPD29390
1120942.AUBM01000012_gene1482	1120942.AUBM01000012_gene1482	Actinomyces georgiae	1120942	aliases:AUBM01000012_GENE1482
435830.HMPREF0045_00318	EHM89653.1	Actinomyces graevenitzii	435830	aliases:365259668,GI:365259668,EHM89653,G9PD39,WP_005984873.1,HMPREF0045_00318,G9PD39_9ACTO,EHM89653.1
1120944.JONS01000076_gene93	1120944.JONS01000076_gene93	Actinomyces israelii	1120944	aliases:JONS01000076_GENE93
1125718.HMPREF1318_2081	EJF36752.1	Actinomyces massiliensis	1125718	aliases:WP_008733871.1,HMPREF1318_2081,EJF36752.1,J0MXG6,DINUCLEAR METAL CENTER PROTEIN, YBGI FAMILY,J0MXG6_9ACTO,394753166,GI:394753166,EJF36752
1115803.HMPREF1129_0490	EJN84609.1	Actinomyces naeslundii	1115803	aliases:EJN84609,WP_003783267.1,399901738,J3JJL6,DINUCLEAR METAL CENTER PROTEIN, YBGI FAMILY,GI:399901738,J3JJL6_ACTNH,EJN84609.1,HMPREF1129_0490
1120945.ATUW01000008_gene942	1120945.ATUW01000008_gene942	Actinomyces neuii	1120945	aliases:A0A133K017_9ACTO,DINUCLEAR METAL CENTER PROTEIN, YBGI FAMILY,HMPREF3198_01236,ATUW01000008_GENE942,A0A133K017,WP_051141926.1
888439.HMPREF9240_00886	EJZ87537.1	Actinomyces neuii	888439	aliases:HMPREF9240_00886,EJZ87537,GI:404392477,EJZ87537.1,K0YUM1_9ACTO,WP_004806322.1,K0YUM1,YBGI/FAMILY DINUCLEAR METAL CENTER PROTEIN,404392477
411466.ACTODO_01650	EDN81184.1	Actinomyces odontolyticus	411466	aliases:A7BDB0_9ACTO,EDN81184,INTERPRO:IPR002678,GI:153798764,EDN81184.1,25045305,DINUCLEAR METAL CENTER PROTEIN, YBGI FAMILY,WP_003792783.1,IPR002678,153798764,A7BDB0,ACTODO_01650
706439.HMPREF9057_02325	EFW26307.1	Actinomyces sp.	706439	aliases:E7NBZ8,E7NBZ8_9ACTO,EFW26307,INTERPRO:IPR002678,EFW26307.1,DINUCLEAR METAL CENTER PROTEIN, YBGI FAMILY,320133944,HMPREF9057_02325,GI:320133944,IPR002678
1219581.HMPREF1628_08425	KGE99706.1	Actinomyces sp.	1219581	aliases:690750617,WP_034510991.1,GI:690750617,A0A095XZ35,A0A095XZ35_9ACTO,KGE99706.1,KGE99706,HMPREF1628_08425
944560.HMPREF9058_2533	EGV13727.1	Actinomyces sp.	944560	aliases:343401221,F9PGP3_9ACTO,EGV13727.1,GI:343401221,F9PGP3,DINUCLEAR METAL CENTER PROTEIN, YBGI FAMILY,WP_009405760.1,HMPREF9058_2533,EGV13727
649743.HMPREF0972_02131	EEZ77393.1	Actinomyces sp.	649743	aliases:WP_009199727.1,HMPREF0972_02131,D0WQQ1_9ACTO,GI:269211053,269211053,EEZ77393.1,DINUCLEAR METAL CENTER PROTEIN, YBGI FAMILY,EEZ77393,INTERPRO:IPR002678,D0WQQ1,IPR002678
1105029.HMPREF1137_0805	EJN46278.1	Actinomyces sp.	1105029	aliases:EJN46278.1,J3J5H6_9ACTO,J3J5H6,EJN46278,398362592,DINUCLEAR METAL CENTER PROTEIN, YBGI FAMILY,WP_007588728.1,HMPREF1137_0805,GI:398362592
1321775.HMPREF1980_00102	ERH33104.1	Actinomyces sp.	1321775	aliases:GI:541491639,541491639,ERH33104,U1RHJ2_9ACTO,INTERPRO:IPR002678,U1RHJ2,DINUCLEAR METAL CENTER PROTEIN, YBGI FAMILY,HMPREF1980_00102,ERH33104.1,WP_021611757.1,IPR002678
888052.HMPREF9006_0393	EFU61846.1	Actinomyces sp.	888052	aliases:E6KQ91_9ACTO,NIF3-LIKE PROTEIN,E6KQ91,EFU61846,GI:315313793,315313793,EFU61846.1,HMPREF9006_0393
888056.HMPREF9062_1777	EGQ73226.1	Actinomyces sp.	888056	aliases:NIF3-LIKE PROTEIN,339883383,GI:339883383,HMPREF9062_1777,WP_009749675.1,F9EH55,EGQ73226,F9EH55_9ACTO,EGQ73226.1
1118058.CAGY01000006_gene1265	1118058.CAGY01000006_gene1265	Actinomyces sp.	1118058	aliases:CAGY01000006_GENE1265
653386.HMPREF0975_01101	EHM94835.1	Actinomyces sp.	653386	aliases:EHM94835,EHM94835.1,WP_009233111.1,GI:365265057,G9PL30_9ACTO,HMPREF0975_01101,365265057,G9PL30
762963.HMPREF9056_00060	EGF58197.1	Actinomyces sp.	762963	aliases:F3P4U2,EGF58197,INTERPRO:IPR002678,328531355,HMPREF9056_00060,GI:328531355,DINUCLEAR METAL CENTER PROTEIN, YBGI FAMILY,EGF58197.1,IPR002678,F3P4U2_9ACTO
1284680.HMPREF1627_04600	KGF00472.1	Actinomyces sp.	1284680	aliases:KGF00472.1,WP_034501465.1,A0A095Y1A2_9ACTO,A0A095Y1A2,HMPREF1627_04600,GI:690751404,690751404,KGF00472
1203556.HMPREF1478_01089	EPD72640.1	Actinomyces sp.	1203556	aliases:GI:512073375,512073375,EPD72640.1,S2ZE50_9ACTO,S2ZE50,EPD72640,HMPREF1478_01089,WP_016461040.1,YBGI/FAMILY DINUCLEAR METAL CENTER PROTEIN
936548.HMPREF1136_1897	EJG15584.1	Actinomyces sp.	936548	aliases:WP_009647836.1,HMPREF1136_1897,EJG15584.1,J0SX11,DINUCLEAR METAL CENTER PROTEIN, YBGI FAMILY,EJG15584,395548296,J0SX11_9ACTO,GI:395548296
1120946.AUBF01000007_gene769	1120946.AUBF01000007_gene769	Actinomyces suimastitidis	1120946	aliases:AUBF01000007_GENE769
521393.JH806633_gene1846	521393.JH806633_gene1846	Actinomyces timonensis	521393	aliases:JH806633_GENE1846
883077.HMPREF9241_00931	EJZ86306.1	Actinomyces turicensis	883077	aliases:EJZ86306,EJZ86306.1,K0YRT0,HMPREF9241_00931,K0YRT0_9ACTO,WP_006681136.1,404391242,YBGI/FAMILY DINUCLEAR METAL CENTER PROTEIN,GI:404391242
525246.HMPREF0058_0560	EEH66580.1	Actinomyces urogenitalis	525246	aliases:226834197,EEH66580.1,WP_006549864.1,DINUCLEAR METAL CENTER PROTEIN, YBGI FAMILY,EEH66580,HMPREF0058_0560,C0W3W6,GI:226834197,C0W3W6_9ACTO
1284679.HMPREF1626_06025	KGF02146.1	Actinomyces urogenitalis	1284679	aliases:HMPREF1626_06025,KGF02146.1,WP_006549864.1,GI:690753148,A0A095WXH2_9ACTO,KGF02146,690753148,A0A095WXH2
1120947.ATUX01000007_gene1097	1120947.ATUX01000007_gene1097	Actinomyces vaccimaxillae	1120947	aliases:ATUX01000007_GENE1097
562973.HMPREF0059_01588	EGE37324.1	Actinomyces viscosus	562973	aliases:EGE37324,F2UYS0_ACTVI,WP_004564740.1,HMPREF0059_01588,F2UYS0,YBGI/FAMILY DINUCLEAR METAL CENTER PROTEIN,EGE37324.1,326636421,GI:326636421
1120948.KB903248_gene4389	1120948.KB903248_gene4389	Actinomycetospora chiangmaiensis	1120948	aliases:KB903248_GENE4389
1246995.AFR_08890	AFR_08890	Actinoplanes friuliensis	1246995	aliases:AFS:AFR_08890,WP_023359598.1,AGZ40067.1,556032820,U5VTG4_9ACTN,AGZ40067,GI:556032820,U5VTG4,AFR_08890
1120949.KB903332_gene9315	1120949.KB903332_gene9315	Actinoplanes globisporus	1120949	aliases:KB903332_GENE9315
512565.AMIS_13270	AMIS_13270	Actinoplanes missouriensis	512565	aliases:381369729,GI:381369729,AMIS_13270,BAL86547,BAL86547.1,I0H0L0,I0H0L0_ACTM4,AMS:AMIS_13270
649831.L083_1798	L083_1798	Actinoplanes sp.	649831	aliases:AGL15308,WP_015619866.1,492003988,R4L9U4_9ACTN,R4L9U4,GI:492003988,AGL15308.1,L083_1798,ACTN:L083_1798
134676.ACPL_1543	ACPL_1543	Actinoplanes sp.	134676	aliases:G8S6I3_ACTS5,ACPL_1543,359833999,G8S6I3,AEV82440,ASE:ACPL_1543,WP_014688513.1,AEV82440.1,GI:359833999
134676.ACPL_4496	ACPL_4496	Actinoplanes sp.	134676	aliases:WP_014691459.1,G8SDG6_ACTS5,ASE:ACPL_4496,GI:359836946,359836946,ACPL_4496,AEV85387.1,G8SDG6,AEV85387
543632.JOJL01000050_gene7396	543632.JOJL01000050_gene7396	Actinoplanes subtropicus	543632	aliases:JOJL01000050_GENE7396
1869.MB27_16110	MB27_16110	Actinoplanes utahensis	1869	aliases:MB27_16110,KHD76532,A0A0A6X8S4,WP_043525395.1,724744479,A0A0A6X8S4_ACTUT,KHD76532.1,GI:724744479
1120950.KB892768_gene5233	1120950.KB892768_gene5233	Actinopolymorpha alba	1120950	aliases:KB892768_GENE5233
414996.IL38_21640	IL38_21640	Actinopolyspora erythraea	414996	aliases:WP_043577470.1,ASU78034,IL38_21640,KGI79800,A0A099D381_9ACTN,CDG81_06605,NIF3-LIKE DINUCLEAR METAL CENTER HEXAMERIC PROTEIN,A0A099D381,AEY:CDG81_06605,693609960,KGI79800.1,GI:693609960
1089546.AQUI01000002_gene1514	1089546.AQUI01000002_gene1514	Actinopolyspora halophila	1089546	aliases:AQUI01000002_GENE1514
1050202.KB913024_gene2285	1050202.KB913024_gene2285	Actinopolyspora mortivallis	1050202	aliases:KB913024_GENE2285
1463820.JOGW01000002_gene6408	1463820.JOGW01000002_gene6408	Actinosporangium sp.	1463820	aliases:JOGW01000002_GENE6408
446462.Amir_0879	Amir_0879	Actinosynnema mirum	446462	aliases:GTP CYCLOHYDROLASE 1 TYPE 2 HOMOLOG,WP_012783502.1,C6WMA6_ACTMD,INTERPRO:IPR002678,AMI:AMIR_0879,255919329,ACU34840.1,AMIR_0879,PROTEIN OF UNKNOWN FUNCTION DUF34,C6WMA6,GI:255919329,ACU34840,IPR002678
7029.ACYPI005250-PA	7029.ACYPI005250-PA	Acyrthosiphon pisum	7029	aliases:UPA00848,LOC100166251,J9JXV7_ACYPI,ACYPI005250-RA,UPI00020628F2,XP_003247907.1,ACYPI005250-PA,ACYPI005250,J9JXV7,PWY-6703,PWY-6147,100166251
926549.KI421517_gene3109	926549.KI421517_gene3109	Adhaeribacter aquaticus	926549	aliases:KI421517_GENE3109
926549.KI421517_gene2859	926549.KI421517_gene2859	Adhaeribacter aquaticus	926549	aliases:KI421517_GENE2859
926549.KI421517_gene1207	926549.KI421517_gene1207	Adhaeribacter aquaticus	926549	aliases:KI421517_GENE1207
1384484.AEQU_0830	AEQU_0830	Adlercreutzia equolifaciens	1384484	aliases:AEQ:AEQU_0830,S6CCK1,BAN76799,WP_022739688.1,AEQU_0830,530778090,GI:530778090,S6CCK1_9ACTN,BAN76799.1
1424334.W822_09725	W822_09725	Advenella kashmirensis	1424334	aliases:WP_024004918.1,565408740,METAL-BINDING PROTEIN,GI:565408740,V8QTY5,W822_09725,V8QTY5_9BURK,ETF03077,ETF03077.1
1247726.MIM_c04960	MIM_c04960	Advenella mimigardefordensis	1247726	aliases:AMIM:MIM_C04960,GI:575430292,575430292,AHG62598,W0PC19_9BURK,W0PC19,WP_025371204.1,MIM_C04960,PUTATIVE DINUCLEAR METAL CENTER PROTEIN, NIF3-LIKE SUPERFAMILY,AHG62598.1
7159.AAEL014038-PA	AAEL014038	Aedes aegypti	7159	aliases:AAG:5579201,NIF3-LIKE PROTEIN 1, PUTATIVE,5579201,Q16HG3,PWY-6983,AAE.13359,PWY-5663,PWY-6703,EAT33684.1,XM_001657274.1,XP_001657324.1,Q16HG3_AEDAE,UPA00848,PWY-5664,PWY-6147,AAEL014038-PA,AAEL014038-RA,AAEL014038,XP_001657324,PWY-7442,UPI0000DAB96E,XM_001657274,AAEL_AAEL014038
1120951.AUBG01000007_gene88	1120951.AUBG01000007_gene88	Aequorivita capsosiphonis	1120951	aliases:AUBG01000007_GENE88
746697.Aeqsu_0461	Aeqsu_0461	Aequorivita sublithincola	746697	aliases:I3YSK5,GTP CYCLOHYDROLASE 1 TYPE 2 HOMOLOG,DINUCLEAR METAL CENTER PROTEIN, YBGI/SA1388 FAMILY,INTERPRO:IPR017221,WP_014781231.1,INTERPRO:IPR002678,I3YSK5_AEQSU,ASL:AEQSU_0461,AFL79973,AFL79973.1,AEQSU_0461,390419216,IPR002678,IPR017221,GI:390419216
655812.HMPREF0061_0155	EFG50525.1	Aerococcus viridans	655812	aliases:32030188,GI:294974820,D4YE66,WP_003141054.1,AVS:AWM76_04560,DINUCLEAR METAL CENTER PROTEIN, YBGI FAMILY,294974820,HMPREF0061_0155,D4YE66_9LACT,AMC00866,EFG50525.1,EFG50525
1175629.AJTG01000025_gene344	1175629.AJTG01000025_gene344	Aerococcus viridans	1175629	aliases:A0A1W9FWZ7_9LACT,A6J77_00090,AJTG01000025_GENE344,NIF3-LIKE DINUCLEAR METAL CENTER HEXAMERIC PROTEIN,A0A1W9FWZ7,AVS:AWM76_04560,AMC00866
585531.HMPREF0063_11173	EFQ83511.1	Aeromicrobium marinum	585531	aliases:EFQ83511,E2SAW5,WP_007078195.1,HMPREF0063_11173,DINUCLEAR METAL CENTER PROTEIN, YBGI FAMILY,GTP CYCLOHYDROLASE 1 TYPE 2 HOMOLOG,311313602,EFQ83511.1,E2SAW5_9ACTN,GI:311313602
1033730.CAHG01000016_gene273	1033730.CAHG01000016_gene273	Aeromicrobium massiliense	1033730	aliases:CAHG01000016_GENE273
1268237.G114_05905	G114_05905	Aeromonas diversa	1268237	aliases:480571005,GI:480571005,N9U386,WP_005349857.1,N9U386_9GAMM,ENY72770,ENY72770.1,G114_05905
1448139.AI20_05225	AHV34620.1	Aeromonas hydrophila	1448139	aliases:AHD:AI20_05225,AI20_05225,GI:604185177,604185177,A0A1B8YVP1_AERHY,METAL-BINDING PROTEIN,NIF3-LIKE DINUCLEAR METAL CENTER HEXAMERIC PROTEIN,AHV34620,A9R12_21650,AHV34620.1,WP_043121783.1,A0A1B8YVP1
380703.AHA_2823	AHA_2823	Aeromonas hydrophila	380703	aliases:4488748,YP_857327,GI:117561300,117561300,A0KM26_AERHH,ABK38248,WP_011706625.1,AHA:AHA_2823,ABK38248.1,A0KM26,AHA_2823,YP_857327.1
382245.ASA_1508	ASA_1508	Aeromonas salmonicida	382245	aliases:WP_005320178.1,4998974,ABO89598.1,GI:142851277,A4SL26,A4SL26_AERS4,142851277,ASA_1508,ASA:ASA_1508,ABO89598
558884.JRGM01000132_gene377	558884.JRGM01000132_gene377	Aeromonas sp.	558884	aliases:JRGM01000132_GENE377
998088.B565_2587	B565_2587	Aeromonas veronii	998088	aliases:AVR:B565_2587,328805423,AEB50622,B565_2587,A0A142E698,METAL-BINDING PROTEIN,AMS64_15710,WP_058053734.1,AEB50622.1,A0A142E698_9GAMM,GI:328805423,28678516
1120953.AUBH01000001_gene1187	1120953.AUBH01000001_gene1187	Aestuariibacter salexigens	1120953	aliases:AUBH01000001_GENE1187
5341.XP_007325231.1	5341.XP_007325231.1	Agaricus bisporus	5341	aliases:GI:597964583,K5Y7S5,K5Y7S5_AGABU,JGIDB:AGABI_VARBUR_1_67713,597964583,AGABI1DRAFT_67713,INTERPRO:IPR002678,GENEID:18830684,XP_007325231,ABP:AGABI1DRAFT67713,XP_007325231.1,XM_007325169.1,18830684,AGABI_VARBUR_1_67713,IPR002678
272556.CF65_01739	CF65_01739	Aggregatibacter actinomycetemcomitans	272556	aliases:AHN72020,CF65_01739,X2K1N0,AHN72020.1,601112086,GI:601112086,X2K1N0_AGGAC,AAH:CF65_01739
694569.D7S_00551	D7S_00551	Aggregatibacter actinomycetemcomitans	694569	aliases:NIF3-LIKE PROTEIN,A0A142FYE8_AGGAC,GI:385874827,ACT75_02285,385874827,31673564,METAL-BINDING PROTEIN,AFI86386.1,WP_032997072.1,AAN:D7S_00551,A0A142FYE8,D7S_00551,AFI86386
1089447.RHAA1_02119	EHK91401.1	Aggregatibacter actinomycetemcomitans	1089447	aliases:359757245,AACT:ACT75_02285,NIF3-LIKE PROTEIN,EHK91401.1,EHK91401,H0KCN8_AGGAC,AMQ93428,RHAA1_02119,GI:359757245,H0KCN8,WP_005576535.1
634176.NT05HA_0380	ACS96807.1	Aggregatibacter aphrophilus	634176	aliases:ACS96807.1,A0A0K1N3Y0_AGGAP,ACS96807,METAL-BINDING PROTEIN,WP_050693433.1,ADJ80_06475,247533561,A0A0K1N3Y0,AAP:NT05HA_0380,NT05HA_0380,GI:247533561,31611351
1120958.AULD01000006_gene55	1120958.AULD01000006_gene55	Agrococcus lahaulensis	1120958	aliases:AULD01000006_GENE55
1120959.ATXF01000001_gene371	1120959.ATXF01000001_gene371	Agromyces italicus	1120959	aliases:ATXF01000001_GENE371
1120960.ATXG01000018_gene1367	1120960.ATXG01000018_gene1367	Agromyces subbeticus	1120960	aliases:ATXG01000018_GENE1367
9646.ENSAMEP00000006256	NIF3L1	Ailuropoda melanoleuca	9646	aliases:XM_002915843.1,EFB29503.1,D2H2Q0_AILME,ENSAMEP00000006256,ENSAMET00000006511,PANDA_003920,100471839,LOC100471839,AML:100471839,ENSAMEG00000005921,D2H2Q0,XP_002915889.1,XP_019651546.1,XP_011218825.1,NIF3L1,XM_002915843,XP_019651544.1,ACTA01136033,XP_019651545.1,NGG1 INTERACTING FACTOR 3 LIKE 1,UPI0001C0D9ED,XP_011218824.1,XP_002915889,NIF3L1-201
349741.Amuc_0007	Amuc_0007	Akkermansia muciniphila	349741	aliases:GI:187424575,34175207,AMU:AMUC_0007,187424575,INTERPRO:IPR002678,ACD03854,B2UL65_AKKM8,ACD03854.1,PROTEIN OF UNKNOWN FUNCTION DUF34,WP_012419069.1,AMUC_0007,B2UL65,IPR002678
511.JT27_06885	JT27_06885	Alcaligenes faecalis	511	aliases:A0A0A2N7K1,GI:700681000,WP_035269842.1,KGP03003.1,A0A0A2N7K1_ALCFA,METAL-BINDING PROTEIN,KGP03003,700681000,AFA:UZ73_12070,ALO38931,JT27_06885
511.JT27_06290	JT27_06290	Alcaligenes faecalis	511	aliases:ALO38823,AFA:UZ73_11485,GI:700680894,A0A0A2N9R2_ALCFA,700680894,KGP02897.1,NGG1P INTERACTING FACTOR 3 PROTEIN, NIF3,JT27_06290,WP_035269658.1,A0A0A2N9R2,KGP02897
393595.ABO_0566	ABO_0566	Alcanivorax borkumensis	393595	aliases:ABO_0566,UNIPROTKB/TREMBL:Q0VS34,INTERPRO:IPR002678,Q0VS34_ALCBS,CAL16014,CAL16014.1,ABO:ABO_0566,Q0VS34,110646538,GI:110646538,IPR002678
930169.B5T_03562	B5T_03562	Alcanivorax dieselolei	930169	aliases:GI:407254721,407254721,AFT71828.1,ADI:B5T_03562,K0CGX9,AFT71828,B5T_03562,WP_014995889.1,NIF3,K0CGX9_ALCDB
1177179.A11A3_10237	EKF74190.1	Alcanivorax hongdengensis	1177179	aliases:407765740,L0WEE9,WP_008929225.1,A11A3_10237,GI:407765740,L0WEE9_9GAMM,EKF74190.1,EKF74190
1177181.T9A_02055	T9A_02055	Alcanivorax jadensis	1177181	aliases:A0A095S8K4_9GAMM,686987998,T9A_02055,KGD60857.1,A0A095S8K4,WP_035248069.1,GI:686987998,KGD60857
1380387.JADM01000003_gene2434	1380387.JADM01000003_gene2434	Alcanivorax sp.	1380387	aliases:JADM01000003_GENE2434
1397527.Q670_12435	Q670_12435	Alcanivorax sp.	1397527	aliases:ERP91269,GI:550665488,Q670_12435,WP_022984954.1,ERP91269.1,550665488,METAL-BINDING PROTEIN,U7G0D8,U7G0D8_9GAMM
1177154.Y5S_01397	Y5S_01397	Alcanivorax sp.	1177154	aliases:KGD65504,686992678,WP_035231639.1,A0A095SMD8,Y5S_01397,KGD65504.1,A0A095SMD8_9GAMM,GI:686992678
236097.ADG881_74	ADG881_74	Alcanivorax sp.	236097	aliases:ADG881_74,B4WWV1,196193013,EDX87972,B4WWV1_9GAMM,CONSERVED HYPOTHETICAL PROTEIN TIGR00486,EDX87972.1,GI:196193013
1120963.KB894503_gene1943	1120963.KB894503_gene1943	Algicola sagamiensis	1120963	aliases:KB894503_GENE1943
388413.ALPR1_19878	EAZ81330.2	Algoriphagus machipongonensis	388413	aliases:A3HXK7,GI:311302802,EAZ81330.2,A3HXK7_9BACT,EAZ81330,PUTATIVE NIF3 (NGG1P INTERACTING FACTOR 3),311302802,ALPR1_19878
388413.ALPR1_15404	EAZ80028.1	Algoriphagus machipongonensis	388413	aliases:126575718,WP_008201834.1,A3I0N2,A3I0N2_9BACT,ALPR1_15404,EAZ80028.1,GI:126575718,NIF3-RELATED PROTEIN,GTP CYCLOHYDROLASE 1 TYPE 2 HOMOLOG,EAZ80028
1120965.AUBV01000010_gene2808	1120965.AUBV01000010_gene2808	Algoriphagus mannitolivorans	1120965	aliases:AUBV01000010_GENE2808
1120965.AUBV01000003_gene507	1120965.AUBV01000003_gene507	Algoriphagus mannitolivorans	1120965	aliases:AUBV01000003_GENE507
1120966.AUBU01000005_gene3773	1120966.AUBU01000005_gene3773	Algoriphagus marincola	1120966	aliases:AUBU01000005_GENE3773
1305737.JAFX01000001_gene1450	1305737.JAFX01000001_gene1450	Algoriphagus marincola	1305737	aliases:A0A0P7YEA4_9BACT,GTP CYCLOHYDROLASE 1 TYPE 2 HOMOLOG,WP_024282875.1,A0A0P7YEA4,HLUCCX10_03645,JAFX01000001_GENE1450
1120968.AUBX01000012_gene2898	1120968.AUBX01000012_gene2898	Algoriphagus vanfongensis	1120968	aliases:AUBX01000012_GENE2898
1120970.AUBZ01000013_gene1899	1120970.AUBZ01000013_gene1899	Aliagarivorans taiwanensis	1120970	aliases:AUBZ01000013_GENE1899
596154.Alide2_0856	AEB83269.1	Alicycliphilus denitrificans	596154	aliases:GI:329308854,INTERPRO:IPR002678,ALIDE2_0856,AEB83269.1,ADK:ALIDE2_0856,F4G7W6_ALIDK,NGG1P INTERACTING FACTOR 3 PROTEIN, NIF3,329308854,AEB83269,F4G7W6,IPR002678
596153.Alide_0900	Alide_0900	Alicycliphilus denitrificans	596153	aliases:E8U0B7_ALIDB,ALIDE_0900,ADN:ALIDE_0900,INTERPRO:IPR002678,PROTEIN OF UNKNOWN FUNCTION DUF34,ADU98665,GI:317116177,317116177,E8U0B7,ADU98665.1,IPR002678
1048834.TC41_2085	TC41_2085	Alicyclobacillus acidocaldarius	1048834	aliases:GTP CYCLOHYDROLASE 1 TYPE 2 HOMOLOG,AEJ43996.1,WP_014464842.1,AAD:TC41_2085,AEJ43996,TC41_2085,GI:339289886,F8IEV0,PROTEIN OF UNKNOWN FUNCTION DUF34,F8IEV0_ALIAT,339289886
1048834.TC41_2030	TC41_2030	Alicyclobacillus acidocaldarius	1048834	aliases:F8IEP6,AEJ43942.1,339289832,AAD:TC41_2030,WP_014464790.1,AEJ43942,GI:339289832,F8IEP6_ALIAT,PROTEIN OF UNKNOWN FUNCTION DUF34,TC41_2030
521098.Aaci_1930	Aaci_1930	Alicyclobacillus acidocaldarius	521098	aliases:ACV58942,AAC:AACI_1930,INTERPRO:IPR002678,PROTEIN OF UNKNOWN FUNCTION DUF34,GI:257478623,257478623,C8WXY0,ACV58942.1,WP_012811220.1,IPR002678,C8WXY0_ALIAD,AACI_1930
521098.Aaci_1974	Aaci_1974	Alicyclobacillus acidocaldarius	521098	aliases:C8WY24_ALIAD,GTP CYCLOHYDROLASE 1 TYPE 2 HOMOLOG,ACV58986,INTERPRO:IPR002678,257478667,AACI_1974,AAC:AACI_1974,ACV58986.1,WP_012811262.1,C8WY24,PROTEIN OF UNKNOWN FUNCTION DUF34,GI:257478667,IPR002678
1356854.N007_20395	N007_20395	Alicyclobacillus acidoterrestris	1356854	aliases:GTP CYCLOHYDROLASE 1 TYPE 2 HOMOLOG,529052250,WP_021295278.1,EPZ52604,GI:529052250,T0CIJ9_ALIAG,N007_20395,EPZ52604.1,T0CIJ9
1120971.AUCA01000020_gene956	1120971.AUCA01000020_gene956	Alicyclobacillus contaminans	1120971	aliases:AUCA01000020_GENE956
1120972.AUMH01000001_gene1273	1120972.AUMH01000001_gene1273	Alicyclobacillus herbarius	1120972	aliases:AUMH01000001_GENE1273
1382304.JNIL01000001_gene872	1382304.JNIL01000001_gene872	Alicyclobacillus macrosporangiidus	1382304	aliases:A0A1I7K7B0_9BACL,A0A1I7K7B0,WP_074953612.1,GTP CYCLOHYDROLASE 1 TYPE 2 HOMOLOG,JNIL01000001_GENE872,SAMN05421543_11424
1120973.AQXL01000087_gene3225	1120973.AQXL01000087_gene3225	Alicyclobacillus pohliae	1120973	aliases:AQXL01000087_GENE3225
1120973.AQXL01000130_gene1238	1120973.AQXL01000130_gene1238	Alicyclobacillus pohliae	1120973	aliases:AQXL01000130_GENE1238
1111479.AXAR01000023_gene2932	1111479.AXAR01000023_gene2932	Alicyclobacillus pomorum	1111479	aliases:AXAR01000023_GENE2932
316275.VSAL_I0840	VSAL_I0840	Aliivibrio salmonicida	316275	aliases:B6EHM5_ALISL,INTERPRO:IPR002678,B6EHM5,VSAL_I0840,CAQ78525,CAQ78525.1,208008370,WP_012549627.1,VSA:VSAL_I0840,UNIPROTKB/TREMBL:B6EHM5,GI:208008370,IPR002678
1195246.AGRI_01395	AGRI_01395	Alishewanella agri	1195246	aliases:EIW90483,SERYL-TRNA SYNTHETASE,EIW90483.1,WP_008983247.1,AGRI_01395,I8UEP8_9ALTE,I8UEP8,392607609,GI:392607609
1129374.AJE_01926	AJE_01926	Alishewanella jeotgali	1129374	aliases:EHR41996,NIF3 PROTEIN,EHR41996.1,WP_008949416.1,H3ZAN2,AJE_01926,374570867,GI:374570867,H3ZAN2_9ALTE
679935.Alfi_0142	Alfi_0142	Alistipes finegoldii	679935	aliases:I3YHT7_ALIFI,DINUCLEAR METAL CENTER PROTEIN, YBGI/SA1388 FAMILY,GI:390422049,INTERPRO:IPR002678,AFL76555.1,I3YHT7,AFL76555,ALFI_0142,390422049,AFD:ALFI_0142,WP_014774369.1,IPR002678
742725.HMPREF9450_01107	EHB92242.1	Alistipes indistinctus	742725	aliases:HMPREF9450_01107,EHB92242,G5H847,WP_009133913.1,G5H847_9BACT,GI:353347968,EHB92242.1,353347968
1203611.KB894541_gene1557	1203611.KB894541_gene1557	Alistipes onderdonkii	1203611	aliases:B5G41_04250,A0A1Y3QY13,A0A1Y3QY13_9BACT,NIF3-LIKE DINUCLEAR METAL CENTER HEXAMERIC PROTEIN,KB894541_GENE1557
445970.ALIPUT_00094	EDS04223.1	Alistipes putredinis	445970	aliases:ALIPUT_00094,B0MTJ4_9BACT,INTERPRO:IPR002678,EDS04223,GI:167660093,167660093,B0MTJ4,DINUCLEAR METAL CENTER PROTEIN, YBGI FAMILY,WP_004328919.1,EDS04223.1,IPR002678
1033732.CAHI01000027_gene556	1033732.CAHI01000027_gene556	Alistipes senegalensis	1033732	aliases:CAHI01000027_GENE556
1501391.LG35_02955	LG35_02955	Alistipes sp.	1501391	aliases:DINUCLEAR METAL CENTER PROTEIN,LG35_02955,WP_035472083.1,KHE42567.1,A0A0B0C1F9_9BACT,725665424,GI:725665424,A0A0B0C1F9,KHE42567
908612.HMPREF9720_1771	EFR56546.1	Alistipes sp.	908612	aliases:GI:313157116,E4MEW5_9BACT,WP_009598822.1,313157116,DINUCLEAR METAL CENTER PROTEIN, YBGI FAMILY,EFR56546,HMPREF9720_1771,EFR56546.1,E4MEW5
1229520.ADIAL_2065	ADIAL_2065	Alkalibacterium sp.	1229520	aliases:EXJ22479.1,GTP CYCLOHYDROLASE 1 TYPE 2 HOMOLOG,EXJ22479,WP_034303160.1,589842205,ADIAL_2065,A0A011QS32,A0A011QS32_9LACT,HYPOTHETICAL PROTEIN YBGI,GI:589842205
927658.AJUM01000034_gene117	927658.AJUM01000034_gene117	Alkaliflexus imshenetskii	927658	aliases:AJUM01000034_GENE117
187272.Mlg_2212	Mlg_2212	Alkalilimnicola ehrlichii	187272	aliases:MLG_2212,INTERPRO:IPR002678,ABI57554,GI:114227755,114227755,PROTEIN OF UNKNOWN FUNCTION DUF34,AEH:MLG_2212,Q0A6I3_ALKEH,Q0A6I3,ABI57554.1,IPR002678
293826.Amet_0528	Amet_0528	Alkaliphilus metalliredigens	293826	aliases:A6TKN7,ABR46755.1,PROTEIN OF UNKNOWN FUNCTION DUF34,AMET_0528,149948227,ABR46755,A6TKN7_ALKMQ,AMT:AMET_0528,INTERPRO:IPR002678,WP_011971663.1,GI:149948227,IPR002678
293826.Amet_2990	Amet_2990	Alkaliphilus metalliredigens	293826	aliases:ABR49134.1,A6TSG6,INTERPRO:IPR002678,WP_012064102.1,A6TSG6_ALKMQ,GI:149950606,GTP CYCLOHYDROLASE 1 TYPE 2 HOMOLOG,PROTEIN OF UNKNOWN FUNCTION DUF34,ABR49134,AMET_2990,149950606,AMT:AMET_2990,IPR002678
350688.Clos_1282	Clos_1282	Alkaliphilus oremlandii	350688	aliases:A8MG99_ALKOO,CLOS_1282,AOE:CLOS_1282,ABW18827,INTERPRO:IPR002678,158140515,WP_012159139.1,ABW18827.1,GTP CYCLOHYDROLASE 1 TYPE 2 HOMOLOG,PROTEIN OF UNKNOWN FUNCTION DUF34,IPR002678,GI:158140515,A8MG99
1408422.JHYF01000002_gene2475	1408422.JHYF01000002_gene2475	Alkaliphilus transvaalensis	1408422	aliases:JHYF01000002_GENE2475
1120977.JHUX01000003_gene1609	1120977.JHUX01000003_gene1609	Alkanindiges illinoisensis	1120977	aliases:JHUX01000003_GENE1609
8496.XP_006272607.1	NIF3L1	Alligator mississippiensis	8496	aliases:AMJ:102575403,XP_006272607.1,GENEID:102575403,NIF3-LIKE PROTEIN 1,PUTATIVE GTP CYCLOHYDROLASE 1 TYPE 2 NIF3L1,A0A151NAT6,XM_006272545.1,A0A151NAT6_ALLMI,NIF3L1,NGG1 INTERACTING FACTOR 3 LIKE 1,Y1Q_0008769,XP_006272607
38654.XP_006022171.1	NIF3L1	Alligator sinensis	38654	aliases:XP_014374674,XP_014374674.1,A0A1U8DAC5_ALLSI,GENEID:102385350,NGG1 INTERACTING FACTOR 3 LIKE 1,XP_006022171.1,GI:557278200,ASN:102385350,102385350,NIF3L1,NIF3-LIKE PROTEIN 1,XM_006022109.1,A0A1U8DAC5,XP_006022171,557278200
572477.Alvin_0067	Alvin_0067	Allochromatium vinosum	572477	aliases:D3RUZ0,ORF7,GTP CYCLOHYDROLASE 1 TYPE 2 HOMOLOG,ALV:ALVIN_0067,ADC61039.1,ALVIN_0067,INTERPRO:IPR002678,P45371,GI:288895203,288895203,ADC61039,GCH1L_ALLVD,PROTEIN OF UNKNOWN FUNCTION DUF34,IPR002678
1120978.KB894079_gene741	1120978.KB894079_gene741	Allofustis seminis	1120978	aliases:KB894079_GENE741
883081.HMPREF9698_00381	EKU94069.1	Alloiococcus otitis	883081	aliases:WP_003776794.1,K9EA22_9LACT,GTP CYCLOHYDROLASE 1 TYPE 2 HOMOLOG,HMPREF9698_00381,EKU94069,GI:425731250,YBGI/FAMILY DINUCLEAR METAL CENTER PROTEIN,K9EA22,425731250,EKU94069.1
211114.JOEF01000017_gene3916	211114.JOEF01000017_gene3916	Allokutzneria albata	211114	aliases:A0A1H0CIU6_9PSEU,JOEF01000017_GENE3916,DINUCLEAR METAL CENTER PROTEIN, YBGI/SA1388 FAMILY,SAMN04489726_7249,A0A1H0CIU6
28583.AMAG_09094T0	AMAG_09094	Allomyces macrogynus	28583	aliases:A0A0L0SNH1_ALLMA,AMAG_09094T0,AMAG_09094,A0A0L0SNH1,ALLOMYCES MACROGYNUS ATCC 38327 YBGI/FAMILY DINUCLEAR METAL CENTER PROTEIN (278 AA),YBGI/FAMILY DINUCLEAR METAL CENTER PROTEIN
28583.AMAG_11950T0	AMAG_11950	Allomyces macrogynus	28583	aliases:A0A0L0SYM5_ALLMA,AMAG_11950,ALLOMYCES MACROGYNUS ATCC 38327 YBGI/FAMILY DINUCLEAR METAL CENTER PROTEIN (278 AA),AMAG_11950T0,YBGI/FAMILY DINUCLEAR METAL CENTER PROTEIN,A0A0L0SYM5
679199.HMPREF9332_00502	EHG23688.1	Alloprevotella rava	679199	aliases:G5GAA1,GI:355376444,355376444,HMPREF9332_00502,G5GAA1_9BACT,WP_009346913.1,EHG23688,EHG23688.1
1120979.ATVB01000021_gene1374	1120979.ATVB01000021_gene1374	Alloscardovia omnicolens	1120979	aliases:ATVB01000021_GENE1374
156578.ATW7_06688	ATW7_06688	Alteromonadales bacterium	156578	aliases:EAW28328,ATW7_06688,GI:119447058,WP_006792373.1,A0Y056_9GAMM,EAW28328.1,119447058,A0Y056
589873.EP13_09675	EP13_09675	Alteromonas australica	589873	aliases:EP13_09675,AIF98925.1,A0A075P1T4_9ALTE,AAL:EP13_09675,666082432,WP_044057073.1,METAL-BINDING PROTEIN,A0A075P1T4,AIF98925,GI:666082432
314275.MADE_1009615	AEA98061.1	Alteromonas macleodii	314275	aliases:GI:327551343,AEA98061,327551343,MADE_1009615,METAL-BINDING PROTEIN,NIF3-LIKE DINUCLEAR METAL CENTER HEXAMERIC PROTEIN,A0A1J0SFK8_9ALTE,AMC:MADE_1009615,AEA98061.1,WP_071951526.1,A0A1J0SFK8,BM525_09040
1004785.AMBLS11_09035	AFT78388.1	Alteromonas macleodii	1004785	aliases:WP_014998346.1,NIF3 PROTEIN,K0D0K3,407249203,AFT78388,GI:407249203,AFT78388.1,AMK:AMBLS11_09035,AMBLS11_09035,K0D0K3_ALTMS
715451.ambt_07720	ambt_07720	Alteromonas sp.	715451	aliases:GI:332993017,AEF03072,AMBT_07720,WP_013784010.1,AEF03072.1,NIF3 PROTEIN,F5Z7M9_ALTNA,F5Z7M9,ALT:AMBT_07720,332993017
1537994.JQFW01000006_gene3069	1537994.JQFW01000006_gene3069	Alteromonas sp.	1537994	aliases:JQFW01000006_GENE3069
1298865.H978DRAFT_1404	EXF48871.1	Alteromonas sp.	1298865	aliases:588495573,A0A010QBU0,EXF48871.1,H978DRAFT_1404,EXF48871,WP_025255232.1,A0A010QBU0_9ALTE,DINUCLEAR METAL CENTER PROTEIN, YBGI/SA1388 FAMILY,GI:588495573
1223410.KN050846_gene2612	1223410.KN050846_gene2612	Altibacter lentus	1223410	aliases:KN050846_GENE2612
1120980.JQKH01000042_gene1584	1120980.JQKH01000042_gene1584	Alysiella crassa	1120980	aliases:JQKH01000042_GENE1584
1047013.AQSP01000111_gene1668	1047013.AQSP01000111_gene1668	Aminicenantes bacterium	1047013	aliases:AQSP01000111_GENE1668
1304874.JAFY01000007_gene1707	1304874.JAFY01000007_gene1707	Aminiphilus circumscriptus	1304874	aliases:JAFY01000007_GENE1707
1304874.JAFY01000007_gene2195	1304874.JAFY01000007_gene2195	Aminiphilus circumscriptus	1304874	aliases:JAFY01000007_GENE2195
572547.Amico_1094	Amico_1094	Aminobacterium colombiense	572547	aliases:AMICO_1094,D5EF86,INTERPRO:IPR002678,PROTEIN OF UNKNOWN FUNCTION DUF34,ADE57218,ACO:AMICO_1094,GI:293617064,WP_013048481.1,293617064,ADE57218.1,D5EF86_AMICL,IPR002678
1304875.JAFZ01000001_gene1673	1304875.JAFZ01000001_gene1673	Aminobacterium mobile	1304875	aliases:JAFZ01000001_GENE1673
584708.Apau_1204	Apau_1204	Aminomonas paucivorans	584708	aliases:WP_006300832.1,EFQ23630,310783232,PROTEIN OF UNKNOWN FUNCTION DUF34,E3CY97_9BACT,GI:310783232,E3CY97,EFQ23630.1,APAU_1204
584708.Apau_2253	Apau_2253	Aminomonas paucivorans	584708	aliases:WP_006301906.1,EFQ24662.1,APAU_2253,E3CZN0,310784264,EFQ24662,E3CZN0_9BACT,GI:310784264
429009.Adeg_0543	Adeg_0543	Ammonifex degensii	429009	aliases:ADG:ADEG_0543,260864585,ACX51691,C9RBR4,WP_015738569.1,ADEG_0543,C9RBR4_AMMDK,GI:260864585,ACX51691.1
562743.JH976437_gene2246	562743.JH976437_gene2246	Amphibacillus jilinensis	562743	aliases:JH976437_GENE2246
562743.JH976439_gene86	562743.JH976439_gene86	Amphibacillus jilinensis	562743	aliases:JH976439_GENE86
562743.JH976434_gene1275	562743.JH976434_gene1275	Amphibacillus jilinensis	562743	aliases:JH976434_GENE1275
698758.AXY_11250	AXY_11250	Amphibacillus xylanus	698758	aliases:GI:407727259,BAM47257.1,AXL:AXY_11250,K0J284,K0J284_AMPXN,BAM47257,GTP CYCLOHYDROLASE 1 TYPE 2 HOMOLOG,AXY_11250,407727259,WP_015009862.1
400682.PAC_15720740	400682.PAC_15720740	Amphimedon queenslandica	400682	aliases:PAC:15720740,PAC_15720740,XP_003386081.2,AQU:100633892,XP_003386081,A0A1X7V159_AMPQE,AQU1.222212,100633892,A0A1X7V159
1278309.KB907099_gene2403	1278309.KB907099_gene2403	Amphritea japonica	1278309	aliases:KB907099_GENE2403
1089545.KB913037_gene5635	1089545.KB913037_gene5635	Amycolatopsis balhimycina	1089545	aliases:KB913037_GENE5635
1089544.KB912942_gene5073	1089544.KB912942_gene5073	Amycolatopsis benzoatilytica	1089544	aliases:KB912942_GENE5073
208439.AJAP_33770	AJAP_33770	Amycolatopsis japonica	208439	aliases:A0A075UZC6,AJA:AJAP_33770,GI:667684946,AJAP_33770,UPF0135 FAMILY PROTEIN,667684946,AIG79562,AIG79562.1,A0A075UZC6_9PSEU
330084.JNYZ01000039_gene4012	330084.JNYZ01000039_gene4012	Amycolatopsis jejuensis	330084	aliases:JNYZ01000039_GENE4012
749927.AMED_1172	AMED_1172	Amycolatopsis mediterranei	749927	aliases:ADJ42987.1,AMD:AMED_1172,9435385,ADJ42987,YP_003763389.1,NGG1P-INTERACTING FACTOR 3,299792612,YP_003763389,GI:299792612,AMED_1172,A0A0H3CWG1_AMYMU,WP_013223077.1,A0A0H3CWG1
1068978.AMETH_1055	AMETH_1055	Amycolatopsis methanolica	1068978	aliases:WP_017987012.1,AIJ21147,GI:672355269,672355269,NGG1P-INTERACTING FACTOR 3,A0A076MTP3_AMYME,AMETH_1055,AIJ21147.1,A0A076MTP3,AMQ:AMETH_1055
1068980.ARVW01000001_gene2038	1068980.ARVW01000001_gene2038	Amycolatopsis nigrescens	1068980	aliases:ARVW01000001_GENE2038
1125971.ASJB01000081_gene2688	SD37_35380	Amycolatopsis orientalis	1125971	aliases:WP_044854712.1,NIF3-LIKE DINUCLEAR METAL CENTER HEXAMERIC PROTEIN,SD37_35380,ASJB01000081_GENE2688,A0A193C790_AMYOR,A0A193C790
287986.DV20_25965	DV20_25965	Amycolatopsis rifamycinica	287986	aliases:KDN19424.1,A0A066U5L7_9PSEU,GI:637496381,A0A066U5L7,WP_043784448.1,DV20_25965,KDN19424,637496381
208444.JNYY01000029_gene1080	208444.JNYY01000029_gene1080	Amycolatopsis vancoresmycina	208444	aliases:JNYY01000029_GENE1080
443218.AS9A_1242	AS9A_1242	Amycolicicoccus subflavus	443218	aliases:F6EEJ7,AS9A_1242,GI:333481134,AEF39694,333481134,ASD:AS9A_1242,F6EEJ7_HOYSD,GTP CYCLOHYDROLASE 1 TYPE 2 HOMOLOG,AEF39694.1
272123.Anacy_3369	Anacy_3369	Anabaena cylindrica	272123	aliases:K9ZJR7,INTERPRO:IPR002678,ACY:ANACY_3369,K9ZJR7_ANACC,ANACY_3369,GI:428680006,WP_015215398.1,AFZ58772,NGG1P INTERACTING FACTOR 3 PROTEIN, NIF3,428680006,AFZ58772.1,IPR002678
163908.KB235896_gene2511	163908.KB235896_gene2511	Anabaena sp.	163908	aliases:KB235896_GENE2511
46234.ANA_C13126	ANA_C13126	Anabaena sp.	46234	aliases:K7WYT2_9NOST,NIF3-LIKE PROTEIN,K7WYT2,ANB:ANA_C13126,413971722,WP_015080956.1,ANA_C13126,AFW95811,AFW95811.1,GI:413971722
240292.Ava_4876	Ava_4876	Anabaena variabilis	240292	aliases:ABA24473,Q3M3G3,INTERPRO:IPR002678,ABA24473.1,Q3M3G3_ANAVT,75704797,GI:75704797,AVA_4876,PROTEIN OF UNKNOWN FUNCTION DUF34,AVA:AVA_4876,IPR002678
1120985.AUMI01000001_gene2070	1120985.AUMI01000001_gene2070	Anaeroarcus burkinensis	1120985	aliases:AUMI01000001_GENE2070
592015.HMPREF1705_00875	EFD24668.1	Anaerobaculum hydrogeniformans	592015	aliases:HMPREF1705_03498,WP_009201079.1,EFD24668.1,INTERPRO:IPR002678,A0A0T5XER7_9BACT,HMPREF1705_00875,DINUCLEAR METAL CENTER PROTEIN, YBGI FAMILY,EFD24668,289503504,A0A0T5XER7,GI:289503504,IPR002678
891968.Anamo_0965	Anamo_0965	Anaerobaculum mobile	891968	aliases:AMO:ANAMO_0965,DINUCLEAR METAL CENTER PROTEIN, YBGI/SA1388 FAMILY,ANAMO_0965,GI:390620444,INTERPRO:IPR002678,IPR002678,I4BWD4,AFM21591,390620444,I4BWD4_ACEMN,WP_014806824.1,AFM21591.1
1120988.AXWV01000001_gene333	1120988.AXWV01000001_gene333	Anaerobiospirillum succiniciproducens	1120988	aliases:AXWV01000001_GENE333
561177.ANHYDRO_01767	EEB35582.1	Anaerococcus hydrogenalis	561177	aliases:32464334,INTERPRO:IPR002678,EEB35582.1,EEB35582,B6WAQ0,DINUCLEAR METAL CENTER PROTEIN, YBGI FAMILY,GI:212675975,B6WAQ0_9FIRM,ANHYDRO_01767,212675975,WP_004815346.1,IPR002678
525254.HMPREF0072_2155	EEI85237.1	Anaerococcus lactolyticus	525254	aliases:GI:227235222,227235222,DINUCLEAR METAL CENTER PROTEIN, YBGI FAMILY,WP_004828843.1,EEI85237,C2BII5_9FIRM,C2BII5,HMPREF0072_2155,EEI85237.1
1284686.HMPREF1630_08125	KGF03236.1	Anaerococcus lactolyticus	1284686	aliases:HMPREF1630_08125,WP_037328584.1,KGF03236.1,A0A095X0K0_9FIRM,690754287,A0A095X0K0,KGF03236,GI:690754287
879305.HMPREF9290_0222	EGC81839.1	Anaerococcus prevotii	879305	aliases:F0GWN0,GI:325478728,HMPREF9290_0222,WP_004835134.1,EGC81839,F0GWN0_9FIRM,325478728,DINUCLEAR METAL CENTER PROTEIN, YBGI FAMILY,EGC81839.1
525919.Apre_1133	Apre_1133	Anaerococcus prevotii	525919	aliases:APRE_1133,ACV29159.1,C7RD96_ANAPD,PROTEIN OF UNKNOWN FUNCTION DUF34,INTERPRO:IPR002678,APR:APRE_1133,ACV29159,WP_015778062.1,C7RD96,GI:256798504,256798504,IPR002678
1033733.CAEK01000002_gene136	1033733.CAEK01000002_gene136	Anaerococcus senegalensis	1033733	aliases:CAEK01000002_GENE136
1118055.CAGU01000008_gene1117	1118055.CAGU01000008_gene1117	Anaerococcus sp.	1118055	aliases:CAGU01000008_GENE1117
938293.CAJU020000015_gene1921	938293.CAJU020000015_gene1921	Anaerococcus sp.	938293	aliases:CAJU020000015_GENE1921
525255.HMPREF0077_0506	EEI83423.1	Anaerococcus tetradius	525255	aliases:227218157,C2CG96,EEI83423.1,EEI83423,HMPREF0077_0506,C2CG96_9FIRM,GI:227218157
525255.HMPREF0077_0507	EEI83424.1	Anaerococcus tetradius	525255	aliases:C2CG97,GI:227218158,NIF3 (NGG1P INTERACTING FACTOR 3),EEI83424,227218158,HMPREF0077_0507,EEI83424.1,C2CG97_9FIRM
655811.HMPREF0078_0920	EEU12593.1	Anaerococcus vaginalis	655811	aliases:EEU12593,GI:256398980,WP_004838959.1,DINUCLEAR METAL CENTER PROTEIN, YBGI FAMILY,C7HUG9_9FIRM,C7HUG9,HMPREF0078_0920,256398980,EEU12593.1
445971.ANASTE_00568	EDS72855.1	Anaerofustis stercorihominis	445971	aliases:EDS72855,EDS72855.1,ANASTE_00568,INTERPRO:IPR002678,GI:169258889,DINUCLEAR METAL CENTER PROTEIN, YBGI FAMILY,B1C768_9FIRM,B1C768,WP_007049019.1,169258889,IPR002678
861450.HMPREF0080_00970	EHM41099.1	Anaeroglobus geminatus	861450	aliases:WP_006789952.1,IPR002678,364563288,EHM41099.1,G9YH44,INTERPRO:IPR002678,DINUCLEAR METAL CENTER PROTEIN, YBGI FAMILY,GI:364563288,HMPREF0080_00970,EHM41099,G9YH44_9FIRM
926569.ANT_12330	ANT_12330	Anaerolinea thermophila	926569	aliases:GI:319994496,ATM:ANT_12330,ANT_12330,WP_013559655.1,E8N4A3,BAJ63267,BAJ63267.1,E8N4A3_ANATU,319994496
886379.AEWI01000046_gene3106	886379.AEWI01000046_gene3106	Anaerophaga thermohalophila	886379	aliases:AEWI01000046_GENE3106
1347392.CCEZ01000006_gene1184	1347392.CCEZ01000006_gene1184	Anaerosalibacter sp.	1347392	aliases:CCEZ01000006_GENE1184
411490.ANACAC_01871	EDR98246.1	Anaerostipes caccae	411490	aliases:167654117,GI:167654117,EDR98246.1,B0ME76_9FIRM,ANACAC_01871,EDR98246,DINUCLEAR METAL CENTER PROTEIN, YBGI FAMILY,INTERPRO:IPR002678,WP_006567352.1,B0ME76,IPR002678
411490.ANACAC_00972	EDR98389.1	Anaerostipes caccae	411490	aliases:GI:167654260,EDR98389.1,INTERPRO:IPR002678,ANACAC_00972,167654260,B0MBF5,B0MBF5_9FIRM,PUTATIVE DINUCLEAR METAL CENTER PROTEIN, YBGI FAMILY,EDR98389,IPR002678
445972.ANACOL_03276	EDS09831.1	Anaerotruncus colihominis	445972	aliases:B0PEP8_9FIRM,ANACOL_03276,INTERPRO:IPR002678,167665701,EDS09831,DINUCLEAR METAL CENTER PROTEIN, YBGI FAMILY,EDS09831.1,IPR002678,WP_006876139.1,GI:167665701,B0PEP8
1235835.C814_00730	C814_00730	Anaerotruncus sp.	1235835	aliases:R9LZZ4,C814_00730,WP_016315436.1,R9LZZ4_9FIRM,507807105,EOS63996,EOS63996.1,GI:507807105,YBGI/FAMILY DINUCLEAR METAL CENTER PROTEIN
1408423.JHYA01000011_gene1257	NZ47_07135	Anaerovibrio lipolyticus	1408423	aliases:NZ47_07135,NGG1P INTERACTING FACTOR 3 PROTEIN, NIF3,A0A0B2JZI3_9FIRM,JHYA01000011_GENE1257,A0A0B2JZI3,WP_039208405.1
1200557.JHWV01000002_gene109	1200557.JHWV01000002_gene109	Anaerovibrio sp.	1200557	aliases:JHWV01000002_GENE109
1120998.AUFC01000001_gene1979	1120998.AUFC01000001_gene1979	Anaerovorax odorimutans	1120998	aliases:AUFC01000001_GENE1979
1048983.EL17_02590	EL17_02590	Anditalea andensis	1048983	aliases:GTP CYCLOHYDROLASE 1 TYPE 2 HOMOLOG,NGG1P INTERACTING FACTOR 3 PROTEIN, NIF3,A0A074LL66_9BACT,KEO74582.1,GI:660633058,EL17_02590,660633058,A0A074LL66,WP_035070446.1,KEO74582
1120999.JONM01000010_gene4068	1120999.JONM01000010_gene4068	Andreprevotia chitinilytica	1120999	aliases:JONM01000010_GENE4068
649747.HMPREF0083_05607	ERI05612.1	Aneurinibacillus aneurinilyticus	649747	aliases:WP_021619421.1,ERI05612,U1Y043_ANEAE,INTERPRO:IPR002678,GI:542053968,542053968,HMPREF0083_05607,ERI05612.1,U1Y043,IPR002678
649747.HMPREF0083_01992	ERI09897.1	Aneurinibacillus aneurinilyticus	649747	aliases:ERI09897.1,U1YCS6_ANEAE,542059021,ERI09897,HMPREF0083_01992,INTERPRO:IPR002678,U1YCS6,GI:542059021,DINUCLEAR METAL CENTER PROTEIN, YBGI FAMILY,GTP CYCLOHYDROLASE 1 TYPE 2 HOMOLOG,WP_021620492.1,IPR002678
28377.ENSACAP00000016779	NIF3L1	Anolis carolinensis	28377	aliases:UPI0001F9D76B,XP_003215187,ACR.15852,ENSACAP00000016779,XP_003215187.1,ENSACAT00000017110,XM_003215139.1,ACS:100559970,G1KTG6_ANOCA,CALS-7,MDS015,NIF3L1,NGG1 INTERACTING FACTOR 3 LIKE 1,NIF3L1-201,NIF3 NGG1 INTERACTING FACTOR 3-LIKE 1 (S. CEREVISIAE),G1KTG6,ENSACAG00000017036,XM_003215139,ALS2CR1
43151.ADAC006347-PA	AND_006347	Anopheles darlingi	43151	aliases:ADAC006347,AD06347,AND_006347,W5JGF2_ANODA,UPI0003E45DAD,PWY-6147,UPA00848,ETN61980,W5JGF2,ADAC006347-PA,PWY-6703,ADAC006347-RA,ANON-35F/36A
7165.AGAP012228-PA	1280465	Anopheles gambiae	7165	aliases:Q7Q029_ANOGA,AGA.3313,EAA00104.3,XM_320310,AGCP10051,AGAP_ENSANGG00000014122,AGAP012228,Q7Q029,1280465,AGCT54371,AGAP012228-RA,PWY-6703,XP_320310,AGCG55818,AGAP012228-PA,NGG1 INTERACTING FACTOR 3-LIKE PROTEIN,UPA00848,XP_320310.3,UPI000001E5FC,PWY-6147,AGA:AGAP_AGAP012228,ENSANGG00000014122,AGAP_AGAP012228,XM_320310.4
491915.Aflv_0860	Aflv_0860	Anoxybacillus flavithermus	491915	aliases:AFL:AFLV_0860,UNCHARACTERIZED CONSERVED PROTEIN,GI:212560183,GTP CYCLOHYDROLASE 1 TYPE 2 HOMOLOG,WP_012574526.1,B7GH77_ANOFW,B7GH77,AFLV_0860,ACJ33238,212560183,ACJ33238.1
1297581.H919_00330	EMT47120.1	Anoxybacillus flavithermus	1297581	aliases:GI:475643369,H919_00330,EMT47120,EMT47120.1,475643369
1380408.AVGH01000012_gene1408	1380408.AVGH01000012_gene1408	Anoxybacillus flavithermus	1380408	aliases:AVGH01000012_GENE1408
1267580.AF6_0847	AF6_0847	Anoxybacillus flavithermus	1267580	aliases:ELK22544,GI:432001671,ELK22544.1,432001671,AF6_0847
198467.NP92_09785	NP92_09785	Anoxybacillus gonensis	198467	aliases:29574232,GTP CYCLOHYDROLASE 1 TYPE 2 HOMOLOG,A0A0A2SJU1_9BACI,WP_035066690.1,A0A0A2SJU1,KGP59951,GI:701226671,KGP59951.1,AGN:AFK25_10260,NP92_09785,AKS38944,701226671
1382358.JHVN01000001_gene937	1382358.JHVN01000001_gene937	Anoxybacillus tepidamans	1382358	aliases:JHVN01000001_GENE937
7460.GB44783-PA	LOC551415	Apis mellifera	7460	aliases:GB44783,PWY-6983,GB11638,UPI0000DB6BDE,A0A088A0Q2_APIME,PWY-6147,XP_006569643,PUTATIVE GTP CYCLOHYDROLASE 1 TYPE 2,XM_006569580.1,UPA00848,H9K3B9,A0A088A0Q2,XM_006569580,PWY-5664,GB44783-RA,PWY-5663,AME.7497,LOC551415,AME:551415,PWY-7442,XP_006569643.1,GB44783-PA
6500.XP_005111921.1	6500.XP_005111921.1	Aplysia californica	6500	aliases:101860065,CDD:238182,LOC101860464,TAXON:6500,6500,NIF3-LIKE PROTEIN 1-LIKE ISOFORM X1,GI:524914205,XP_005111921.1,524914205,524914203,GI:524914203,GENEID:101860065,238182,GENEID:101860464,101860464,XP_005111921,XM_005111864.1
1538295.JY96_04760	JY96_04760	Aquabacterium sp.	1538295	aliases:KGM41907,A0A0A0DY69_9BURK,KGM41907.1,METAL-BINDING PROTEIN,A0A0A0DY69,JY96_04760,699056115,GI:699056115
1121004.ATVC01000028_gene121	1121004.ATVC01000028_gene121	Aquaspirillum serpens	1121004	aliases:ATVC01000028_GENE121
620914.JH621246_gene2844	620914.JH621246_gene2844	Aquimarina agarilytica	620914	aliases:JH621246_GENE2844
1443665.JACA01000023_gene3700	1443665.JACA01000023_gene3700	Aquimarina macrocephali	1443665	aliases:JACA01000023_GENE3700
1296416.JACB01000037_gene1414	1296416.JACB01000037_gene1414	Aquimarina megaterium	1296416	aliases:JACB01000037_GENE1414
1121007.AUML01000015_gene3910	1121007.AUML01000015_gene3910	Aquimarina muelleri	1121007	aliases:AUML01000015_GENE3910
1296415.JACC01000021_gene4267	1296415.JACC01000021_gene4267	Aquimarina sp.	1296415	aliases:JACC01000021_GENE4267
1317122.ATO12_21760	EZH72760.1	Aquimarina sp.	1317122	aliases:GTP CYCLOHYDROLASE 1 TYPE 2 HOMOLOG,NGG1P INTERACTING FACTOR 3 PROTEIN, NIF3,610626677,ATO12_21760,EZH72760,A0A023BRZ3_9FLAO,WP_034244068.1,A0A023BRZ3,GI:610626677,EZH72760.1
644284.Arch_0723	Arch_0723	Arcanobacterium haemolyticum	644284	aliases:ARCH_0723,WP_013169953.1,PROTEIN OF UNKNOWN FUNCTION DUF34,296931647,D7BNF6_ARCHD,GI:296931647,D7BNF6,AHE:ARCH_0723,ADH92455,ADH92455.1
1219585.HMPREF1631_02140	KGF06101.1	Arcanobacterium sp.	1219585	aliases:GI:690757336,KGF06101,KGF06101.1,HMPREF1631_02140,A0A095X8V0_9ACTO,WP_034231812.1,A0A095X8V0,690757336
224325.AF_1777	AF_1777	Archaeoglobus fulgidus	224325	aliases:GCH1L_ARCFU,GTP CYCLOHYDROLASE 1 TYPE 2 HOMOLOG,GI:2648773,2648773,AF_1777,O28497,AAB89474,AAB89474.1,AFU:AF_1777,24795520,WP_010879273.1
572546.Arcpr_1033	Arcpr_1033	Archaeoglobus profundus	572546	aliases:ADB58093.1,284012140,PROTEIN OF UNKNOWN FUNCTION DUF34,D2RD99,APO:ARCPR_1033,8739708,ARCPR_1033,GI:284012140,INTERPRO:IPR002678,ADB58093,WP_012940429.1,D2RD99_ARCPA,IPR002678
387631.Asulf_01057	AGK61058.1	Archaeoglobus sulfaticallidus	387631	aliases:DINUCLEAR METAL CENTER PROTEIN, YBGI/SA1388 FAMILY,ASULF_01057,AGK61058,AST:ASULF_01057,N0BDI6,GI:484592415,15392698,WP_015590656.1,N0BDI6_9EURY,AGK61058.1,484592415
693661.Arcve_0865	Arcve_0865	Archaeoglobus veneficus	693661	aliases:10393968,AEA46879.1,327316263,WP_013683551.1,NGG1P INTERACTING FACTOR 3 PROTEIN, NIF3,ARCVE_0865,AEA46879,F2KSB0_ARCVS,GI:327316263,F2KSB0,AVE:ARCVE_0865
944546.ABED_1787	ABED_1787	Arcobacter butzleri	944546	aliases:345470053,WP_014469297.1,BAK71504,3.5.4.16,A0A0M1UQ31,GI:345470053,BAK71504.1,ABT:ABED_1787,ABED_1787,EC 3.5.4.16,A0A0M1UQ31_9PROT
367737.Abu_1978	Abu_1978	Arcobacter butzleri	367737	aliases:3.5.4.16,157700040,A8EW77_ARCB4,ABU_1978,A8EW77,ABU:ABU_1978,24304225,EC 3.5.4.16,WP_012147876.1,GI:157700040,ABV68200,ABV68200.1
1442598.JABW01000024_gene1530	1442598.JABW01000024_gene1530	Arcobacter cibarius	1442598	aliases:JABW01000024_GENE1530
572480.Arnit_2516	Arnit_2516	Arcobacter nitrofigilis	572480	aliases:ANT:ARNIT_2516,GI:296098215,3.5.4.16,PROTEIN OF UNKNOWN FUNCTION DUF34,D5V695_ARCNC,ADG94165.1,ADG94165,ARNIT_2516,D5V695,EC 3.5.4.16,296098215
944547.ABLL_2410	ABLL_2410	Arcobacter sp.	944547	aliases:ARC:ABLL_2410,BAK74285.1,3.5.4.16,G2HYT2,ABLL_2410,GI:345472835,WP_014475116.1,BAK74285,G2HYT2_9PROT,345472835,EC 3.5.4.16
1355368.JART01000024_gene1550	1355368.JART01000024_gene1550	Arcobacter sp.	1355368	aliases:JART01000024_GENE1550
1355374.JARU01000016_gene1019	1355374.JARU01000016_gene1019	Arcobacter sp.	1355374	aliases:JARU01000016_GENE1019
1150600.ADIARSV_0916	EOR95903.1	Arcticibacter svalbardensis	1150600	aliases:GI:507725576,ADIARSV_0916,R9GW52_9SPHI,507725576,EOR95903,EOR95903.1,R9GW52
616991.JPOO01000003_gene1267	616991.JPOO01000003_gene1267	Arenibacter algicola	616991	aliases:GTP CYCLOHYDROLASE 1 TYPE 2 HOMOLOG,A0A221UR72_9FLAO,A0A221UR72,ASO03596,JPOO01000003_GENE1267,AALG:AREALGSMS7_00098,AREALGSMS7_00098
1121011.AUCB01000016_gene4021	1121011.AUCB01000016_gene4021	Arenibacter certesii	1121011	aliases:AUCB01000016_GENE4021
1121012.AUKX01000014_gene2716	1121012.AUKX01000014_gene2716	Arenibacter latericius	1121012	aliases:AUKX01000014_GENE2716
1178825.ALIH01000008_gene718	1178825.ALIH01000008_gene718	Arenitalea lutea	1178825	aliases:ALIH01000008_GENE718,GTP CYCLOHYDROLASE 1 TYPE 2 HOMOLOG,SAMN05216261_2711,A0A1M6GBE3_9FLAO,WP_019387841.1,A0A1M6GBE3
76114.ebA1284	ebA1284	Aromatoleum aromaticum	76114	aliases:WP_011236536.1,56312163,Q5P7A3_AROAE,EBA1284,INTERPRO:IPR002678,CAI06808,UNIPROTKB/TREMBL:Q5P7A3,Q5P7A3,GI:56312163,CAI06808.1,EBA:EBA1284,IPR002678
1121017.AUFG01000050_gene3528	1121017.AUFG01000050_gene3528	Arsenicicoccus bolidensis	1121017	aliases:AUFG01000050_GENE3528
1247024.JRLH01000012_gene2537	1247024.JRLH01000012_gene2537	Arsenophonus endosymbiont	1247024	aliases:JRLH01000012_GENE2537
861360.AARI_15650	AARI_15650	Arthrobacter arilaitensis	861360	aliases:WP_013348919.1,GI:307744816,AARI_15650,CBT75788,307744816,AAI:AARI_15650,CBT75788.1,E1VVY5_GLUAR,UNIPROTKB/TREMBL:E1VVY5,E1VVY5
290340.AAur_2414	AAur_2414	Arthrobacter aurescens	290340	aliases:AAUR_2414,29623809,A1R7D1,ABM09663.1,119950752,AAU:AAUR_2414,WP_011775086.1,ABM09663,PUTATIVE UNCHARACTERIZED CONSERVED PROTEIN TIGR00486,GI:119950752,A1R7D1_PAEAT
1121019.AUMN01000024_gene3565	1121019.AUMN01000024_gene3565	Arthrobacter castelli	1121019	aliases:AUMN01000024_GENE3565
452863.Achl_2193	Achl_2193	Arthrobacter chlorophenolicus	452863	aliases:B8HA69_PSECP,B8HA69,ACL40161.1,219859819,ACH:ACHL_2193,ACHL_2193,GI:219859819,ACL40161,INTERPRO:IPR002678,PROTEIN OF UNKNOWN FUNCTION DUF34,IPR002678
1276920.ADIAG_02339	EMQ98321.1	Arthrobacter gangotriensis	1276920	aliases:NIF3-LIKE PROTEIN,GTP CYCLOHYDROLASE 1 TYPE 2 HOMOLOG,M7MTH9,470217505,EMQ98321.1,WP_007271519.1,M7MTH9_9MICC,EMQ98321,GI:470217505,ADIAG_02339
1077972.ARGLB_074_00080	GAB14660.1	Arthrobacter globiformis	1077972	aliases:WP_003803335.1,H0QPA9_ARTGO,ARGLB_074_00080,GI:359305091,359305091,GAB14660.1,GAB14660,H0QPA9
1304876.AZVC01000017_gene393	1304876.AZVC01000017_gene393	Arthrobacter nicotinovorans	1304876	aliases:CVCC1112_1745,WP_064722268.1,A0A175J4J8_PAENI,AZVC01000017_GENE393,A0A175J4J8
930171.Asphe3_23210	ADX73457.1	Arthrobacter phenanthrenivorans	930171	aliases:APN:ASPHE3_23210,323469772,GI:323469772,ASPHE3_23210,ADX73457.1,CONSERVED HYPOTHETICAL PROTEIN TIGR00486,ADX73457,F0M4Z3,F0M4Z3_PSEPM
1121020.JIAG01000010_gene234	1121020.JIAG01000010_gene234	Arthrobacter sanguinis	1121020	aliases:JIAG01000010_GENE234
1115632.JAFW01000001_gene483	1115632.JAFW01000001_gene483	Arthrobacter sp.	1115632	aliases:JAFW01000001_GENE483
1197706.AKKK01000062_gene1606	1197706.AKKK01000062_gene1606	Arthrobacter sp.	1197706	aliases:AKKK01000062_GENE1606
1132441.KI519454_gene1856	1132441.KI519454_gene1856	Arthrobacter sp.	1132441	aliases:KI519454_GENE1856
1312954.KI914848_gene2063	1312954.KI914848_gene2063	Arthrobacter sp.	1312954	aliases:KI914848_GENE2063
1158050.KB895454_gene1642	1158050.KB895454_gene1642	Arthrobacter sp.	1158050	aliases:KB895454_GENE1642
1101188.KI912155_gene3739	1101188.KI912155_gene3739	Arthrobacter sp.	1101188	aliases:KI912155_GENE3739
1150398.JIBJ01000004_gene2643	1150398.JIBJ01000004_gene2643	Arthrobacter sp.	1150398	aliases:JIBJ01000004_GENE2643
290399.Arth_2444	Arth_2444	Arthrobacter sp.	290399	aliases:116611099,ABK03823.1,PROTEIN OF UNKNOWN FUNCTION DUF34,ABK03823,A0JXQ3,ARTH_2444,INTERPRO:IPR002678,GI:116611099,ART:ARTH_2444,A0JXQ3_ARTS2,IPR002678
494419.ALPM01000065_gene2061	494419.ALPM01000065_gene2061	Arthrobacter sp.	494419	aliases:ALPM01000065_GENE2061
1151118.KB895785_gene2850	1151118.KB895785_gene2850	Arthrobacter sp.	1151118	aliases:KB895785_GENE2850
1151119.KB895491_gene1986	1151119.KB895491_gene1986	Arthrobacter sp.	1151119	aliases:KB895491_GENE1986
1449044.JMLE01000001_gene3714	1449044.JMLE01000001_gene3714	Arthrobacter sp.	1449044	aliases:JMLE01000001_GENE3714
1312959.KI914642_gene1207	1312959.KI914642_gene1207	Arthrobacter sp.	1312959	aliases:KI914642_GENE1207
595593.JREV01000024_gene1401	MB46_09380	Arthrobacter sp.	595593	aliases:NGG1P INTERACTING FACTOR NIF3,ARW:MB46_09380,JREV01000024_GENE1401,MB46_09380,A0A0U3FWC3_9MICC,A0A0U3FWC3,ALV47545
1349820.M707_01865	M707_01865	Arthrobacter sp.	1349820	aliases:M707_01865,ERI39722.1,NGG1P INTERACTING FACTOR 3 PROTEIN, NIF3,542110797,GI:542110797,WP_021470725.1,ERI39722,U2A473,U2A473_9MICC
1096756.ATKN01000022_gene1632	1096756.ATKN01000022_gene1632	Arthrobacter sp.	1096756	aliases:ATKN01000022_GENE1632
13349.G1X5N0	13349.G1X5N0	Arthrobotrys oligospora	13349	aliases:G1X5N0,XP_011119792.1,22890687,AOL_S00054G174,G1X5N0_ARTOA
63400.XP_003014176.1	ARB_07481	Arthroderma benhamiae	63400	aliases:D4ATB7_ARTBC,9521594,302504435,GI:302504435,ARB_07481,XP_003014176,ABE:ARB_07481,NGG1 INTERACTING FACTOR NIF3, PUTATIVE,XP_003014176.1,GENEID:9521594,D4ATB7,XM_003014130.1
63405.XP_002847746.1	MCYG_03252	Arthroderma otae	63405	aliases:9230508,XP_002847746.1,XM_002847700.1,UPF0135 PROTEIN,GENEID:9230508,C5FL61,MCYG_03252,C5FL61_ARTOC
5057.CADACLAP00007276	5057.CADACLAP00007276	Aspergillus clavatus	5057	aliases:NGG1 INTERACTING FACTOR NIF3, PUTATIVE,PWY-6983,CADACLAT00007467,CADACLAG00007467,EAW06877.1,PWY-5663,UPI0000EA5CA9,4700495,XP_001268303.1,PWY-6703,UPA00848,CADACLAP00007276,ACT:ACLA_085740,XM_001268302.1,A1CU90_ASPCL,PWY-5664,PWY-6147,A1CU90,ACLA_085740,XP_001268303,XM_001268302,PWY-7442
5059.CADAFLAP00011283	5059.CADAFLAP00011283	Aspergillus flavus	5059	aliases:AFLA_052920A,EED47238.1,AFLA_052920,B8NS61,7915572,CADAFLAT00011283,CADAFLAG00011283,XM_002383377.1,XP_002383418.1,XM_002383377,NGG1 INTERACTING FACTOR NIF3, PUTATIVE,XP_002383418,AFV:AFLA_052920,B8NS61_ASPFN,CADAFLAP00011283,UPI00018F6BD9
746128.CADAFUBP00007650	746128.CADAFUBP00007650	Aspergillus fumigatus	746128	aliases:CADAFUBT00007787,3508433,Q4WLS6_ASPFU,AFUA_6G12480,NGG1 INTERACTING FACTOR NIF3, PUTATIVE,CADAFUBG00007787,XP_751126.1,AFM:AFUA_6G12480,XP_751126,Q4WLS6,CADAFUBP00007650
40384.G7XM18	AKAW_06091	Aspergillus kawachii	40384	aliases:G7XM18,G7XM18_ASPKW,NGG1 INTERACTING FACTOR NIF3,AKAW_06091
162425.CADANIAP00005045	ANIA_10437	Aspergillus nidulans	162425	aliases:ASPL0000013513,NGG1 INTERACTING FACTOR NIF3, PUTATIVE (AFU_ORTHOLOGUE AFUA_6G12480),C8V7M5_EMENI,NGG1 INTERACTING FACTOR NIF3, PUTATIVE (AFU_ORTHOLOGUE; AFUA_6G12480),CBF75613.1,CADANIAT00005045,NGG1 INTERACTING FACTOR NIF3, PUTATIVE (AFU_ORTHOLOGUE,ANIA_10437,CADANIAG00005045,UPI0001B77F76,CADANIAP00005045,C8V7M5,AN10437.4
5061.CADANGAP00005063	An06g01640	Aspergillus niger	5061	aliases:XM_001390948,CADANGAP00005063,NGG1 INTERACTING FACTOR NIF3,CAK48007.1,XP_001390985.2,ANI_1_202054,CAN33_49075,A2QLL2_ASPNC,CADANGAG00005169,XM_001390948.2,ANG:ANI_1_202054,CADANGAT00005169,A0A254TPH8,AN06G01640,A0A254TPH8_ASPNG,UPI0000EFB09D,XP_001390985,NIF3 (NGG1P INTERACTING FACTOR 3) FAMILY PROTEIN,REMARK: S. CEREVISIAE NGG1 = ADA3
7994.ENSAMXP00000021491	nif3l1	Astyanax mexicanus	7994	aliases:ENSAMXG00000020876,ENSAMXT00000021491,ENSAMXP00000021491,W5LNS9,NIF3-LIKE PROTEIN 1,ZGC:110030,NIF3L1-201,AMEX:103022053,W5LNS9_ASTMX,NIF3L1,XP_022524952,XP_007248752.1,IM:6900987,NIF3 NGG1 INTERACTING FACTOR 3-LIKE 1 (S. CEREVISIAE)
1336234.JAGN01000006_gene415	1336234.JAGN01000006_gene415	Atopobacter phocae	1336234	aliases:JAGN01000006_GENE415
936550.HMPREF1492_0502	EWC93851.1	Atopobium sp.	936550	aliases:Z4WWI8_9ACTN,EWC93851.1,GI:583253384,583253384,NIF3 (NGG1P INTERACTING FACTOR 3),EWC93851,Z4WWI8,WP_035435334.1,HMPREF1492_0502
1321773.HMPREF9069_01038	ERI05116.1	Atopobium sp.	1321773	aliases:WP_021626756.1,HMPREF9069_01038,U1Y2G2,ERI05116.1,INTERPRO:IPR002678,U1Y2G2_9ACTN,542053449,GI:542053449,ERI05116,IPR002678
1121024.AUCD01000052_gene1037	1121024.AUCD01000052_gene1037	Atopococcus tabaci	1121024	aliases:AUCD01000052_GENE1037
12957.ACEP25207-PA	105619385	Atta cephalotes	12957	aliases:H9HYU9_ATTCE,PWY-6703,ACEP25207,ACEP25207-PA,ACEP25207-RA,XP_012056295,UPI00024B51E2,PWY-6147,UPA00848,XP_012056295.1,PWY-7442,ACEP:105619385,PWY-6983,A0A158NFI7,PWY-5664,105619385,PWY-5663,A0A158NFI7_ATTCE,ACEP_00008365
1313421.JHBV01000042_gene3253	1313421.JHBV01000042_gene3253	Aureispira sp.	1313421	aliases:JHBV01000042_GENE3253
160860.XP_007351078.1	160860.XP_007351078.1	Auricularia delicata	160860	aliases:XP_007351078,J0LJV7,INTERPRO:IPR002678,NGG1P INTERACTING FACTOR 3,AURDEDRAFT_69614,598043411,GI:598043411,XM_007351016.1,ADL:AURDEDRAFT_69614,GENEID:18867529,XP_007351078.1,18867529,J0LJV7_AURST,JGIDB:AURDE1_69614,IPR002678,AURDE1_69614
1184607.AUCHE_05_01830	GAB77279.1	Austwickia chelonae	1184607	aliases:GAB77279,K6VKM1,403191893,GAB77279.1,GI:403191893,K6VKM1_9MICO,AUCHE_05_01830
1278971.AOGF01000039_gene231	Z012_10530	Avibacterium paragallinarum	1278971	aliases:AOGF01000039_GENE231,Z012_10530,A0A0F5EW04_AVIPA,WP_017807228.1,METAL-BINDING PROTEIN,A0A0F5EW04
948565.AFFP02000001_gene1098	Z012_10530	Avibacterium paragallinarum	948565	aliases:Z012_10530,A0A0F5EW04_AVIPA,WP_017807228.1,METAL-BINDING PROTEIN,AFFP02000001_GENE1098,A0A0F5EW04
748247.AZKH_0768	AZKH_0768	Azoarcus sp.	748247	aliases:GI:358635810,WP_015434415.1,AZKH_0768,BAL23107,BAL23107.1,358635810,H0PXB5,H0PXB5_9RHOO,AZA:AZKH_0768
62928.azo3336	azo3336	Azoarcus sp.	62928	aliases:CAL95952.1,AZO:AZO3336,119672038,INTERPRO:IPR002678,CAL95952,A1KAU6_AZOSB,UNIPROTKB/TREMBL:A1KAU6,A1KAU6,GI:119672038,AZO3336,WP_011767059.1,IPR002678
322710.Avin_12960	Avin_12960	Azotobacter vinelandii	322710	aliases:ACO77522,AVIN_12960,226718351,ACO77522.1,C1DQ70,C1DQ70_AZOVD,WP_012699942.1,GI:226718351,AVN:AVIN_12960
1121035.AUCH01000003_gene1145	1121035.AUCH01000003_gene1145	Azovibrio restrictus	1121035	aliases:AUCH01000003_GENE1145
1121085.AUCI01000003_gene3232	1121085.AUCI01000003_gene3232	Bacillus aidingensis	1121085	aliases:AUCI01000003_GENE3232
1236973.JCM9157_414	GAE33415.1	Bacillus akibai	1236973	aliases:GTP CYCLOHYDROLASE 1 TYPE 2 HOMOLOG,JCM9157_414,568814845,GAE33415,W4QMU5_BACA3,W4QMU5,GAE33415.1,GI:568814845,WP_035661523.1
1218173.BALCAV_0219460	KGA95924.1	Bacillus alcalophilus	1218173	aliases:GTP CYCLOHYDROLASE 1 TYPE 2 HOMOLOG,A0A094WDU6,GI:685434620,A0A094WDU6_BACAO,685434620,KGA95924.1,BALCAV_0219460,WP_003323410.1,KGA95924
326423.RBAM_023480	yqfO	Bacillus amyloliquefaciens	326423	aliases:GTP CYCLOHYDROLASE 1 TYPE 2 HOMOLOG,UZ38_13120,A0A0D7XPP7,BAY:RBAM_023480,154352629,RBAM_023480,YQFO,ABS74708,ABS74708.1,GI:154352629,A0A0D7XPP7_BACAM
198094.BA_5027	BA_5027	Bacillus anthracis	198094	aliases:PATHEMA:BA_5027,GI:30259518,A0A0J1KIU1_BACAN,AAP28706,A0A0J1KIU1,BA_5027,ABW01_19740,BAN:BA_5027,30259518,AAP28706.1,NP_847220,WP_001991396.1
198094.BA_4512	BA_4512	Bacillus anthracis	198094	aliases:BAN:BA_4512,30259017,GTP CYCLOHYDROLASE 1 TYPE 2 HOMOLOG,DINUCLEAR METAL CENTER PROTEIN, YBGI/SA1388 FAMILY,BA_4512,PATHEMA:BA_4512,WP_001991481.1,A0A0J1HY76_BACAN,GI:30259017,ABW01_11625,NP_846736,A0A0J1HY76,AAP28222,AAP28222.1
260799.BAS4191	BAS4191	Bacillus anthracis	260799	aliases:YP_030439,A0A0J1HY76,BAS4191,BAT:BAS4191,GI:49181114,WP_001991481.1,A0A0J1HY76_BACAN,GTP CYCLOHYDROLASE 1 TYPE 2 HOMOLOG,CONSERVED HYPOTHETICAL PROTEIN TIGR00486,ABW01_11625,49181114,AAT56490,AAT56490.1
260799.BAS4667	BAS4667	Bacillus anthracis	260799	aliases:AAT56961.1,49181585,A0A0J1KIU1_BACAN,YP_030911,A0A0J1KIU1,GI:49181585,ABW01_19740,AAT56961,BAT:BAS4667,BAS4667,WP_001991396.1
720555.BATR1942_10895	ADP33110.1	Bacillus atrophaeus	720555	aliases:BATR1942_10895,GTP CYCLOHYDROLASE 1 TYPE 2 HOMOLOG,GI:310869635,ADP33110.1,BAE:BATR1942_10895,A0A0H3E1H5_BACA1,310869635,ADP33110,23410628,YQFO,WP_004429514.1,A0A0H3E1H5
1117379.BABA_22963	BABA_22963	Bacillus bataviensis	1117379	aliases:EKN64658,409927525,GTP CYCLOHYDROLASE 1 TYPE 2 HOMOLOG,EKN64658.1,K6D9A3_9BACI,NGG1P INTERACTING FACTOR 3 PROTEIN, NIF3,K6D9A3,BABA_22963,GI:409927525,WP_007087584.1
1408424.JHYI01000004_gene3441	1408424.JHYI01000004_gene3441	Bacillus bogoriensis	1408424	aliases:JHYI01000004_GENE3441
1294265.JCM21738_2857	GAE46000.1	Bacillus boroniphilus	1294265	aliases:571144207,JCM21738_2857,W4RNK5_9BACI,GAE46000,GAE46000.1,GI:571144207,W4RNK5
1294265.JCM21738_2858	GAE46001.1	Bacillus boroniphilus	1294265	aliases:GAE46001.1,W4RNX0,JCM21738_2858,571144208,GAE46001,GI:571144208,W4RNX0_9BACI
649639.Bcell_2842	Bcell_2842	Bacillus cellulosilyticus	649639	aliases:315474492,WP_013489427.1,INTERPRO:IPR002678,PROTEIN OF UNKNOWN FUNCTION DUF34,GI:315474492,E6TWD9,E6TWD9_BACCJ,BCO:BCELL_2842,BCELL_2842,IPR002678,ADU31095,ADU31095.1
649639.Bcell_1621	Bcell_1621	Bacillus cellulosilyticus	649639	aliases:WP_013488221.1,315473281,GTP CYCLOHYDROLASE 1 TYPE 2 HOMOLOG,INTERPRO:IPR017221,ADU29884,PROTEIN OF UNKNOWN FUNCTION DUF34,INTERPRO:IPR002678,GI:315473281,E6TW61,IPR017221,E6TW61_BACCJ,BCO:BCELL_1621,ADU29884.1,BCELL_1621,IPR002678
1396.DJ87_574	DJ87_574	Bacillus cereus	1396	aliases:A0A0K6J600,GTP CYCLOHYDROLASE 1 TYPE 2 HOMOLOG,674473232,GI:674473232,NIF3-RELATED PROTEIN,DJ87_574,BCEF:BCRFT9_03370,KFK74015.1,BN2127_JRS1_02525,KFK74015,A0A0K6J600_BACCE,AIE80906
1121087.AUCK01000004_gene1164	1121087.AUCK01000004_gene1164	Bacillus chagannorensis	1121087	aliases:AUCK01000004_GENE1164
265729.GS18_0211480	KEZ51734.1	Bacillus cibi	265729	aliases:GS18_0211480,666911858,GI:666911858,KEZ51734.1,KEZ51734
66692.ABC1693	ABC1693	Bacillus clausii	66692	aliases:BAD64228,GTP CYCLOHYDROLASE 1 TYPE 2 HOMOLOG,BAD64228.1,BCL:ABC1693,34045883,GI:56909701,Q5WHC7,Q5WHC7_BACSK,ABC1693,WP_011246537.1,56909701
345219.Bcoa_2787	Bcoa_2787	Bacillus coagulans	345219	aliases:G2TPK1,GTP CYCLOHYDROLASE 1 TYPE 2 HOMOLOG,G2TPK1_BACCO,INTERPRO:IPR002678,BAG:BCOA_2787,AEP01963.1,GI:347585696,NGG1P INTERACTING FACTOR 3 PROTEIN, NIF3,WP_014097995.1,AEP01963,BCOA_2787,347585696,IPR002678
941639.BCO26_1721	BCO26_1721	Bacillus coagulans	941639	aliases:GTP CYCLOHYDROLASE 1 TYPE 2 HOMOLOG,BCK:BCO26_1721,INTERPRO:IPR002678,F7YZ06_BACC6,AEH53780.1,WP_013859673.1,INTERPRO:IPR011322,IPR011322,GI:335367829,PROTEIN OF UNKNOWN FUNCTION DUF34,F7YZ06,AEH53780,BCO26_1721,IPR002678,335367829
441769.ABFU01000043_gene3381	441769.ABFU01000043_gene3381	Bacillus coahuilensis	441769	aliases:ABFU01000043_GENE3381
441769.ABFU01000043_gene3382	441769.ABFU01000043_gene3382	Bacillus coahuilensis	441769	aliases:ABFU01000043_GENE3382
315749.Bcer98_3016	ABS23243.1	Bacillus cytotoxicus	315749	aliases:ABS23243,ABS23243.1,BCY:BCER98_3016,A7GSY5_BACCN,INTERPRO:IPR002678,152025473,33898264,A7GSY5,WP_012095480.1,GTP CYCLOHYDROLASE 1 TYPE 2 HOMOLOG,GI:152025473,BCER98_3016,PROTEIN OF UNKNOWN FUNCTION DUF34,IPR002678
1196029.ALIM01000014_gene2923	1196029.ALIM01000014_gene2923	Bacillus endophyticus	1196029	aliases:ALIM01000014_GENE2923,GTP CYCLOHYDROLASE 1 TYPE 2 HOMOLOG,A0A162FMS0,WP_061802011.1,AZF06_02600,BEO:BEH_20000,AKO94171,A0A162FMS0_9BACI
1307436.PBF_21618	PBF_21618	Bacillus firmus	1307436	aliases:EWG08918.1,GTP CYCLOHYDROLASE 1 TYPE 2 HOMOLOG,PBF_21618,W7KS06_BACFI,583920228,NGG1P INTERACTING FACTOR 3 PROTEIN, NIF3,WP_035332687.1,W7KS06,EWG08918,GI:583920228
1307436.PBF_10497	PBF_10497	Bacillus firmus	1307436	aliases:GI:583922253,W7L680,W7L680_BACFI,PBF_10497,WP_035329683.1,EWG10916,EWG10916.1,583922253
1444310.JANV01000191_gene3887	1444310.JANV01000191_gene3887	Bacillus flexus	1444310	aliases:JANV01000191_GENE3887,BFX:BC359_05010,AQX53717
1121090.KB894686_gene3103	1121090.KB894686_gene3103	Bacillus fordii	1121090	aliases:KB894686_GENE3103
1121090.KB894717_gene3229	1121090.KB894717_gene3229	Bacillus fordii	1121090	aliases:KB894717_GENE3229
574375.BAGA_25890	BAGA_25890	Bacillus gaemokensis	574375	aliases:BAGA_25890,A0A073KDI8,659910853,WP_033674346.1,KEK24581.1,A0A073KDI8_9BACI,KEK24581,GI:659910853
574375.BAGA_02995	BAGA_02995	Bacillus gaemokensis	574375	aliases:659912497,GTP CYCLOHYDROLASE 1 TYPE 2 HOMOLOG,KEK26220,A0A073KI02_9BACI,GI:659912497,BAGA_02995,A0A073KI02,KEK26220.1,WP_033672575.1
1121091.AUMP01000002_gene1845	1121091.AUMP01000002_gene1845	Bacillus gelatini	1121091	aliases:AUMP01000002_GENE1845
272558	BH1380	Bacillus halodurans	272558	aliases:GTP CYCLOHYDROLASE 1 TYPE 2 HOMOLOG,WP_010897545.1,BAB05099,UNKNOWN CONSERVED PROTEIN,BH1380,GCH1L_BACHD,BHA:BH1380,Q9KD39,10173996
1246626.BleG1_1496	BleG1_1496	Bacillus lehensis	1246626	aliases:AIC94079.1,AIC94079,A0A060M204,GTP CYCLOHYDROLASE 1 TYPE 2 HOMOLOG,A0A060M204_9BACI,BLE:BLEG1_1496,BLEG1_1496,WP_038478963.1,GI:655552215,655552215
279010.BL03697	yqfO	Bacillus licheniformis	279010	aliases:GI:145903057,Q65H96_BACLD,145903057,WP_003183574.1,BLD:BLI02696,AAU41568,AAU24207.2,Q65H96,GTP CYCLOHYDROLASE 1 TYPE 2 HOMOLOG,YQFO,AAU24207,3027620,Q62SQ2,BL03697,UPF0135 PROTEIN FAMILY PROTEIN YQFO
1196324.A374_10660	A374_10660	Bacillus macauensis	1196324	aliases:GTP CYCLOHYDROLASE 1 TYPE 2 HOMOLOG,WP_007202216.1,I8UEG1,GI:391876602,EIT85198,EIT85198.1,391876602,I8UEG1_9BACI,A374_10660
1196324.A374_02399	A374_02399	Bacillus macauensis	1196324	aliases:I8AM86_9BACI,I8AM86,GI:391878478,SMS PROTEIN,EIT87067.1,A374_02399,WP_007200579.1,391878478,EIT87067
574376.BAMA_22185	BAMA_22185	Bacillus manliponensis	574376	aliases:KEK19505.1,GTP CYCLOHYDROLASE 1 TYPE 2 HOMOLOG,BAMA_22185,WP_034638820.1,A0A073JZ38_9BACI,659905660,GI:659905660,KEK19505,A0A073JZ38
574376.BAMA_02915	BAMA_02915	Bacillus manliponensis	574376	aliases:KEK18745,GI:659904881,A0A073JWR6_9BACI,KEK18745.1,SMS PROTEIN,BAMA_02915,659904881,A0A073JWR6,WP_034639904.1
1211814.CAPG01000044_gene2410	1211814.CAPG01000044_gene2410	Bacillus massilioanorexius	1211814	aliases:CAPG01000044_GENE2410
1034347.CAHJ01000039_gene4644	1034347.CAHJ01000039_gene4644	Bacillus massiliosenegalensis	1034347	aliases:CAHJ01000039_GENE4644
545693.BMQ_4538	BMQ_4538	Bacillus megaterium	545693	aliases:GTP CYCLOHYDROLASE 1 TYPE 2 HOMOLOG,ADE71542,294351213,BMQ_4538,WP_013059215.1,BMQ:BMQ_4538,D5DSE4,ADE71542.1,D5DSE4_BACMQ,GI:294351213
1348908.KI518588_gene2138	1348908.KI518588_gene2138	Bacillus megaterium	1348908	aliases:KI518588_GENE2138
796606.BMMGA3_11870	yqfO	Bacillus methanolicus	796606	aliases:BMET:BMMGA3_11870,662719559,I3EAK9,I3EAK9_BACMT,GI:662719559,WP_004435761.1,AIE60769,AIE60769.1,BMMGA3_11870,GTP CYCLOHYDROLASE 1 TYPE 2 HOMOLOG,YQFO,UPF0135-LIKE PROTEIN
997296.PB1_15114	PB1_15114	Bacillus methanolicus	997296	aliases:EIJ78899.1,WP_004437944.1,GTP CYCLOHYDROLASE 1 TYPE 2 HOMOLOG,EIJ78899,I3DXC8,387586575,PB1_15114,I3DXC8_BACMT,GI:387586575
1051501.AYTL01000030_gene2686	1051501.AYTL01000030_gene2686	Bacillus mojavensis	1051501	aliases:AYTL01000030_GENE2686
1405.DJ92_1393	DJ93_1315	Bacillus mycoides	1405	aliases:GTP CYCLOHYDROLASE 1 TYPE 2 HOMOLOG,NIF3-RELATED PROTEIN,AIK38747,AIK38747.1,A0A090YM94_BACMY,A0A090YM94,GI:673975757,673975757,WP_042979920.1,DJ93_1315,DJ92_1393
1405.DJ92_1866	DJ92_1866	Bacillus mycoides	1405	aliases:673974336,NIF3 FAMILY PROTEIN,DJ92_1866,AIK37326.1,AIK37326,GI:673974336
1405.DJ92_346	DJ92_346	Bacillus mycoides	1405	aliases:AIK40787,NIF3 FAMILY PROTEIN,673977797,GI:673977797,AIK40787.1,DJ92_346
1196031.ALEG01000061_gene2084	A361_21025	Bacillus oceanisediminis	1196031	aliases:GTP CYCLOHYDROLASE 1 TYPE 2 HOMOLOG,ALEG01000061_GENE2084,A0A160MEG4_9BACI,AND41537,BON:A361_21025,34373954,A0A160MEG4,A361_21025,WP_019382854.1
1196031.ALEG01000041_gene2621	A361_16150	Bacillus oceanisediminis	1196031	aliases:A0A160MDQ5,34375917,BON:A361_16150,WP_019382234.1,ALEG01000041_GENE2621,AND40618,A361_16150,A0A160MDQ5_9BACI,NGG1P INTERACTING FACTOR NIF3
333138.LQ50_00815	LQ50_00815	Bacillus okhensis	333138	aliases:A0A0B0IM05_9BACI,GTP CYCLOHYDROLASE 1 TYPE 2 HOMOLOG,WP_034625015.1,GI:727091759,A0A0B0IM05,KHF41867,727091759,KHF41867.1,LQ50_00815
398511.BpOF4_13750	ADC50801.1	Bacillus pseudofirmus	398511	aliases:WP_012958163.1,GTP CYCLOHYDROLASE 1 TYPE 2 HOMOLOG,ADC50801.1,288546918,D3FY42,GI:288546918,ADC50801,D3FY42_BACPE,BPOF4_13750,BPF:BPOF4_13750
1174504.AJTN02000262_gene658	1174504.AJTN02000262_gene658	Bacillus psychrosaccharolyticus	1174504	aliases:AJTN02000262_GENE658
315750.BPUM_2250	yqfO	Bacillus pumilus	315750	aliases:GI:157681775,A8FFA2_BACP2,BPU:BPUM_2250,A8FFA2,WP_012010604.1,157681775,GTP CYCLOHYDROLASE 1 TYPE 2 HOMOLOG,ABV62919,ABV62919.1,BPUM_2250,YQFO
1403313.AXBR01000008_gene579	1403313.AXBR01000008_gene579	Bacillus simplex	1403313	aliases:GTP CYCLOHYDROLASE 1 TYPE 2 HOMOLOG,BSJ:UP17_16615,A0A098FHH8_9BACI,AXBR01000008_GENE579,WP_072273232.1,AMM93896,A0A098FHH8,BN1180_03876
665952.HMPREF1015_00296	EHL73720.1	Bacillus smithii	665952	aliases:GTP CYCLOHYDROLASE 1 TYPE 2 HOMOLOG,EHL73720,EHL73720.1,AKP47832,HMPREF1015_00296,A0A0H4PIU2,BSM4216_2597,363622561,GI:363622561,WP_048623698.1,YBGI/FAMILY DINUCLEAR METAL CENTER PROTEIN,A0A0H4PIU2_9BACI,BSM:BSM4216_2597
1274524.BSONL12_07892	EME74898.1	Bacillus sonorensis	1274524	aliases:452975079,EME74898.1,M5P621_9BACI,M5P621,BSONL12_07892,GTP CYCLOHYDROLASE 1 TYPE 2 HOMOLOG,WP_006637585.1,GI:452975079,EME74898
1499680.CCFE01000018_gene1560	1499680.CCFE01000018_gene1560	Bacillus sp.	1499680	aliases:CCFE01000018_GENE1560
1450694.BTS2_2838	BTS2_2838	Bacillus sp.	1450694	aliases:X0RAX5_9BACI,GTP CYCLOHYDROLASE 1 TYPE 2 HOMOLOG,591274615,X0RAX5,BTS2_2838,WP_045485912.1,GAF65938,GI:591274615,GAF65938.1
1243664.CAVL020000006_gene4954	1243664.CAVL020000006_gene4954	Bacillus sp.	1243664	aliases:CAVL020000006_GENE4954
1132442.KB889752_gene2264	1132442.KB889752_gene2264	Bacillus sp.	1132442	aliases:KB889752_GENE2264
935836.JAEL01000073_gene3086	935836.JAEL01000073_gene3086	Bacillus sp.	935836	aliases:JAEL01000073_GENE3086
935837.JAEK01000001_gene2205	935837.JAEK01000001_gene2205	Bacillus sp.	935837	aliases:JAEK01000001_GENE2205
935837.JAEK01000032_gene2594	935837.JAEK01000032_gene2594	Bacillus sp.	935837	aliases:JAEK01000032_GENE2594
665959.HMPREF1013_03152	EFV76607.1	Bacillus sp.	665959	aliases:E5WL19_9BACI,GI:317395885,HMPREF1013_03152,317395885,EFV76607,EFV76607.1,E5WL19
665959.HMPREF1013_03151	EFV76606.1	Bacillus sp.	665959	aliases:EFV76606.1,HMPREF1013_03151,317395884,GI:317395884,E5WL18,E5WL18_9BACI,EFV76606
665959.HMPREF1013_02319	EFV77358.1	Bacillus sp.	665959	aliases:EFV77358.1,317396647,GTP CYCLOHYDROLASE 1 TYPE 2 HOMOLOG,EFV77358,GI:317396647,E5WIN7,E5WIN7_9BACI,WP_009332983.1,HMPREF1013_02319
1460640.JCM19046_2549	GAF18008.1	Bacillus sp.	1460640	aliases:W7ZE24,GAF18008.1,GI:585392065,W7ZE24_9BACI,585392065,YQFO PROTEIN,GTP CYCLOHYDROLASE 1 TYPE 2 HOMOLOG,GAF18008,JCM19046_2549,WP_051991027.1
666686.B1NLA3E_16020	AGK54948.1	Bacillus sp.	666686	aliases:AGK54948,484578150,AGK54948.1,N0AWB9_9BACI,GI:484578150,WP_015595000.1,GTP CYCLOHYDROLASE 1 TYPE 2 HOMOLOG,N0AWB9,BACI:B1NLA3E_16020,B1NLA3E_16020
1461580.CCAS010000005_gene778	1461580.CCAS010000005_gene778	Bacillus sp.	1461580	aliases:CCAS010000005_GENE778
1347086.CCBA010000034_gene2647	1347086.CCBA010000034_gene2647	Bacillus sp.	1347086	aliases:CCBA010000034_GENE2647
1347086.CCBA010000015_gene656	1347086.CCBA010000015_gene656	Bacillus sp.	1347086	aliases:CCBA010000015_GENE656
1408303.JNJJ01000002_gene3974	1408303.JNJJ01000002_gene3974	Bacillus sp.	1408303	aliases:JNJJ01000002_GENE3974
1408303.JNJJ01000019_gene4224	1408303.JNJJ01000019_gene4224	Bacillus sp.	1408303	aliases:JNJJ01000019_GENE4224
1347368.HG964408_gene7175	1347368.HG964408_gene7175	Bacillus sp.	1347368	aliases:HG964408_GENE7175
1347369.CCAD010000054_gene161	1347369.CCAD010000054_gene161	Bacillus sp.	1347369	aliases:CCAD010000054_GENE161
1134413.ANNK01000111_gene1587	1134413.ANNK01000111_gene1587	Bacillus sp.	1134413	aliases:ANNK01000111_GENE1587
406124.ACPC01000017_gene631	406124.ACPC01000017_gene631	Bacillus sp.	406124	aliases:ACPC01000017_GENE631
406124.ACPC01000017_gene630	406124.ACPC01000017_gene630	Bacillus sp.	406124	aliases:ACPC01000017_GENE630
406124.ACPC01000019_gene3348	406124.ACPC01000019_gene3348	Bacillus sp.	406124	aliases:ACPC01000019_GENE3348
1340434.AXVA01000005_gene4772	1340434.AXVA01000005_gene4772	Bacillus sp.	1340434	aliases:AXVA01000005_GENE4772
1169144.KB910958_gene3948	1169144.KB910958_gene3948	Bacillus sp.	1169144	aliases:KB910958_GENE3948
1169144.KB910965_gene3048	1169144.KB910965_gene3048	Bacillus sp.	1169144	aliases:KB910965_GENE3048
1169144.KB910930_gene1620	1169144.KB910930_gene1620	Bacillus sp.	1169144	aliases:KB910930_GENE1620
1499685.CCFJ01000046_gene3429	1499685.CCFJ01000046_gene3429	Bacillus sp.	1499685	aliases:CCFJ01000046_GENE3429
1423321.AS29_03625	AS29_03625	Bacillus sp.	1423321	aliases:WP_035405121.1,AS29_001905,GTP CYCLOHYDROLASE 1 TYPE 2 HOMOLOG,A0A176JAG7,AS29_03625,KEZ57593,A0A176JAG7_9BACI,GI:666919537,KEZ57593.1,666919537
1071073.KI530537_gene1778	1071073.KI530537_gene1778	Bacillus sp.	1071073	aliases:KI530537_GENE1778
1178540.BA70_15400	BA70_15400	Bacillus sp.	1178540	aliases:BA70_15400,A0A081LCU3,WP_034319516.1,A0A081LCU3_9BACI,660775825,KEP27069,GTP CYCLOHYDROLASE 1 TYPE 2 HOMOLOG,GI:660775825,KEP27069.1
224308.BSU25170	yqfO	Bacillus subtilis	224308	aliases:GTP CYCLOHYDROLASE 1 TYPE 2 HOMOLOG,GOA:P54472,CAB14447.1,P54472,UNIPROTKB/SWISS-PROT:P54472,WP_004399125.1,INTERPRO:IPR002678,GCH1L_BACSU,IPR017221,IPR002678,NP_390396,937901,SUBTILIST:BG11661,BG11661,O32024,YQFO,CAB14447,NP_390396.1,GI:2634950,INTERPRO:IPR017221,BSU25170,BSU:BSU25170,2634950
35841.BT1A1_2232	B4065_0392	Bacillus thermoamylovorans	35841	aliases:WP_041847526.1,678286945,GTP CYCLOHYDROLASE 1 TYPE 2 HOMOLOG,GI:678286945,A0A0D0FUJ9,CEE02053,B4065_0392,BT1A1_2232,UPF0135 PROTEIN,A0A0D0FUJ9_9BACI,CEE02053.1
1033734.CAET01000065_gene2173	1033734.CAET01000065_gene2173	Bacillus timonensis	1033734	aliases:CAET01000065_GENE2173
1033734.CAET01000068_gene2565	1033734.CAET01000068_gene2565	Bacillus timonensis	1033734	aliases:CAET01000068_GENE2565
1033734.CAET01000068_gene2564	1033734.CAET01000068_gene2564	Bacillus timonensis	1033734	aliases:CAET01000068_GENE2564
218284.CCDN010000001_gene766	218284.CCDN010000001_gene766	Bacillus vietnamensis	218284	aliases:A0A0P6WCE1,GTP CYCLOHYDROLASE 1 TYPE 2 HOMOLOG,CCDN010000001_GENE766,WP_060673469.1,AM506_15860,A0A0P6WCE1_9BACI
1131730.BAVI_25080	BAVI_25080	Bacillus vireti	1131730	aliases:GI:566066924,W1SFS1,GTP CYCLOHYDROLASE 1 TYPE 2 HOMOLOG,WP_024031169.1,W1SFS1_9BACI,ETI65948,BAVI_25080,NGG1P INTERACTING FACTOR 3 PROTEIN, NIF3,ETI65948.1,566066924
315730.BcerKBAB4_3112	ABY44289.1	Bacillus weihenstephanensis	315730	aliases:GI:163863230,WP_012261311.1,INTERPRO:IPR002678,ABY44289.1,163863230,A9VML6_BACWK,PROTEIN OF UNKNOWN FUNCTION DUF34,A9VML6,BWE:BCERKBAB4_3112,IPR002678,BCERKBAB4_3112,ABY44289
315730.BcerKBAB4_4141	ABY45303.1	Bacillus weihenstephanensis	315730	aliases:BCERKBAB4_4141,163864244,WP_002129128.1,A9VHR8,INTERPRO:IPR002678,ABY45303.1,GTP CYCLOHYDROLASE 1 TYPE 2 HOMOLOG,IPR002678,PROTEIN OF UNKNOWN FUNCTION DUF34,29400810,ABY45303,GI:163864244,A9VHR8_BACWK,BWE:BCERKBAB4_4141
1178537.BA1_04782	BA1_04782	Bacillus xiamenensis	1178537	aliases:EKF36664.1,GTP CYCLOHYDROLASE 1 TYPE 2 HOMOLOG,K2NG10,K2NG10_9BACI,407415048,BXI:BK049_15690,GI:407415048,EKF36664,AOZ90010,BA1_04782,WP_008356282.1
862908.BMS_1416	BMS_1416	Bacteriovorax marinus	862908	aliases:E1X052_HALMS,WP_014244063.1,GI:301166703,E1X052,BMX:BMS_1416,BMS_1416,CBW26279,CBW26279.1,301166703
1353529.M899_0252	M899_0252	Bacteriovorax sp.	1353529	aliases:M899_0252,WP_021271155.1,530769126,EQC48176.1,T0RMI1_9PROT,DINUCLEAR METAL CENTER PROTEIN, YBGI FAMILY,GI:530769126,EQC48176,T0RMI1
1201288.M900_1104	M900_1104	Bacteriovorax sp.	1201288	aliases:EQC48046.1,EQC48046,530768989,T0RM69,DINUCLEAR METAL CENTER PROTEIN, YBGI FAMILY,T0RM69_9PROT,GI:530768989,M900_1104,WP_021272837.1
1201290.M902_2674	M902_2674	Bacteriovorax sp.	1201290	aliases:M902_2674,WP_021266774.1,EPZ51148,T0C4J0,DINUCLEAR METAL CENTER PROTEIN, YBGI FAMILY,T0C4J0_9PROT,EPZ51148.1,529050748,GI:529050748
1562701.BBOF01000052_gene1526	1562701.BBOF01000052_gene1526	bacterium endosymbiont	1562701	aliases:BBOF01000052_GENE1526
1504823.CCMM01000013_gene2558	1504823.CCMM01000013_gene2558	bacterium LF-3	1504823	aliases:CCMM01000013_GENE2558
1120746.CCNL01000011_gene1517	1120746.CCNL01000011_gene1517	bacterium MS4	1120746	aliases:CCNL01000011_GENE1517
1504822.CCNO01000011_gene11	1504822.CCNO01000011_gene11	bacterium OL-1	1504822	aliases:CCNO01000011_GENE11
1504822.CCNO01000014_gene1393	1504822.CCNO01000014_gene1393	bacterium OL-1	1504822	aliases:CCNO01000014_GENE1393
1499967.BAYZ01000016_gene6479	U27_02165	bacterium UASB270	1499967	aliases:U27_02165,A0A0S6W6P4_9BACT,A0A0S6W6P4,BAYZ01000016_GENE6479
1499967.BAYZ01000061_gene5930	U27_03965	bacterium UASB270	1499967	aliases:A0A081BXE6,A0A081BXE6_9BACT,BAYZ01000061_GENE5930,U27_03965
1347393.HG726021_gene333	1347393.HG726021_gene333	Bacteroidaceae bacterium	1347393	aliases:HG726021_GENE333
1121094.KB894646_gene18	1121094.KB894646_gene18	Bacteroides barnesiae	1121094	aliases:KB894646_GENE18
411901.BACCAC_00578	EDM22202.1	Bacteroides caccae	411901	aliases:A5ZCI3_9BACE,BCAC:CGC64_13665,GI:149130996,EDM22202.1,INTERPRO:IPR002678,WP_005675834.1,A5ZCI3,DINUCLEAR METAL CENTER PROTEIN, YBGI FAMILY,GTP CYCLOHYDROLASE 1 TYPE 2 HOMOLOG,EDM22202,ASM66896,BACCAC_00578,149130996,IPR002678
1268240.ATFI01000007_gene600	1268240.ATFI01000007_gene600	Bacteroides cellulosilyticus	1268240	aliases:A0A120A1I6,GTP CYCLOHYDROLASE 1 TYPE 2 HOMOLOG,ATFI01000007_GENE600,AA416_03904,ALJ62575,BCEL:BCELLWH2_05375,A0A120A1I6_9BACE,WP_007218548.1
762984.HMPREF9445_00720	EGF53981.1	Bacteroides clarus	762984	aliases:EGF53981.1,F3PFF2,F3PFF2_9BACE,EGF53981,WP_009120914.1,HMPREF9445_00720,DINUCLEAR METAL CENTER PROTEIN, YBGI FAMILY,328526970,GI:328526970,GTP CYCLOHYDROLASE 1 TYPE 2 HOMOLOG
470145.BACCOP_02028	EDV00887.1	Bacteroides coprocola	470145	aliases:EDV00887.1,INTERPRO:IPR002678,EDV00887,WP_007569645.1,INTERPRO:IPR011322,DINUCLEAR METAL CENTER PROTEIN, YBGI FAMILY,GTP CYCLOHYDROLASE 1 TYPE 2 HOMOLOG,B3JJF8,189431902,B3JJF8_9BACE,IPR011322,IPR002678,BACCOP_02028,GI:189431902
547042.BACCOPRO_02594	EEF77086.1	Bacteroides coprophilus	547042	aliases:GTP CYCLOHYDROLASE 1 TYPE 2 HOMOLOG,GI:224019088,INTERPRO:IPR011322,EEF77086,INTERPRO:IPR002678,BACCOPRO_02594,224019088,EEF77086.1,DINUCLEAR METAL CENTER PROTEIN, YBGI FAMILY,IPR011322,WP_008143780.1,S0FE60,S0FE60_9BACE,IPR002678
679937.Bcop_1576	Bcop_1576	Bacteroides coprosuis	679937	aliases:BCOP_1576,INTERPRO:IPR017221,332741286,INTERPRO:IPR002678,EGJ71768.1,F3ZQA2_9BACE,NGG1P INTERACTING FACTOR 3 PROTEIN, NIF3,EGJ71768,GTP CYCLOHYDROLASE 1 TYPE 2 HOMOLOG,GI:332741286,F3ZQA2,IPR017221,IPR002678
357276.EL88_09915	EL88_09915	Bacteroides dorei	357276	aliases:EL88_09915,GI:671711195,GTP CYCLOHYDROLASE 1 TYPE 2 HOMOLOG,BDO:EL88_09915,AII63468,NGG1P INTERACTING FACTOR 3 PROTEIN, NIF3,671711195,AII63468.1,A0A076IQZ2,A0A076IQZ2_9BACE
483216.BACEGG_02700	EEC53132.1	Bacteroides eggerthii	483216	aliases:B7AJV0_BACEV,GTP CYCLOHYDROLASE 1 TYPE 2 HOMOLOG,GI:217986799,INTERPRO:IPR011322,BACEGG_02700,INTERPRO:IPR002678,WP_004291011.1,B7AJV0,EEC53132,DINUCLEAR METAL CENTER PROTEIN, YBGI FAMILY,IPR011322,EEC53132.1,217986799,IPR002678
1077285.AGDG01000031_gene3761	1077285.AGDG01000031_gene3761	Bacteroides faecis	1077285	aliases:GTP CYCLOHYDROLASE 1 TYPE 2 HOMOLOG,WP_010538027.1,SAMN05444400_11197,AGDG01000031_GENE3761,A0A1H2ZAN4,A0A1H2ZAN4_9BACE
483215.BACFIN_06963	EEX45318.1	Bacteroides finegoldii	483215	aliases:WP_007753394.1,BACFIN_06963,260622447,INTERPRO:IPR002678,EEX45318.1,DINUCLEAR METAL CENTER PROTEIN, YBGI FAMILY,C9KXB7_9BACE,GI:260622447,EEX45318,C9KXB7,IPR002678
763034.HMPREF9446_00044	EGF59896.1	Bacteroides fluxus	763034	aliases:F3PMV8,EGF59896,GTP CYCLOHYDROLASE 1 TYPE 2 HOMOLOG,EGF59896.1,328533127,HMPREF9446_00044,F3PMV8_9BACE,INTERPRO:IPR002678,DINUCLEAR METAL CENTER PROTEIN, YBGI FAMILY,WP_009123427.1,GI:328533127,IPR002678
272559.BF9343_2392	CAH08173.1	Bacteroides fragilis	272559	aliases:WP_010993025.1,GTP CYCLOHYDROLASE 1 TYPE 2 HOMOLOG,INTERPRO:IPR017221,60493387,INTERPRO:IPR002678,CAH08173.1,BF9343_2392,CAH08173,UNIPROTKB/TREMBL:Q5LCJ2,IPR017221,BFS:BF9343_2392,Q5LCJ2,Q5LCJ2_BACFN,IPR002678,GI:60493387
457424.BFAG_01961	BFAG_01961	Bacteroides fragilis	457424	aliases:AKA54191,GTP CYCLOHYDROLASE 1 TYPE 2 HOMOLOG,BFB:VU15_10535,EFR53266,BFAG_01961,E4VR03_BACFG,WP_005777839.1,DINUCLEAR METAL CENTER PROTEIN, YBGI FAMILY,GI:313135906,313135906,EFR53266.1,E4VR03
1121097.JCM15093_426	GAK35337.1	Bacteroides graminisolvens	1121097	aliases:GTP CYCLOHYDROLASE 1 TYPE 2 HOMOLOG,665398438,GI:665398438,GAK35337,A0A069CYP3_9BACE,JCM15093_426,WP_024995525.1,A0A069CYP3,GAK35337.1
693979.Bache_2309	Bache_2309	Bacteroides helcogenes	693979	aliases:GTP CYCLOHYDROLASE 1 TYPE 2 HOMOLOG,GI:319417166,319417166,ADV44277,BACHE_2309,E6STN0,WP_013547867.1,PROTEIN OF UNKNOWN FUNCTION DUF34,ADV44277.1,E6STN0_BACT6,BHL:BACHE_2309
471870.BACINT_02010	EDV02899.1	Bacteroides intestinalis	471870	aliases:GTP CYCLOHYDROLASE 1 TYPE 2 HOMOLOG,EDV02899.1,BACINT_02010,189433914,B3CBX4_9BACE,INTERPRO:IPR011322,DINUCLEAR METAL CENTER PROTEIN, YBGI FAMILY,IPR011322,INTERPRO:IPR002678,GI:189433914,B3CBX4,EDV02899,IPR002678
1121098.HMPREF1534_01346	EOA55714.1	Bacteroides massiliensis	1121098	aliases:GTP CYCLOHYDROLASE 1 TYPE 2 HOMOLOG,U6RGH4,HMPREF1534_01346,482607643,U6RGH4_9BACE,EOA55714,YBGI/FAMILY DINUCLEAR METAL CENTER PROTEIN,GI:482607643,EOA55714.1
1235788.C802_03243	C802_03243	Bacteroides massiliensis	1235788	aliases:EOS10263,EOS10263.1,C802_03243,GI:507751294,YBGI/FAMILY DINUCLEAR METAL CENTER PROTEIN,507751294
997884.HMPREF1068_02593	EIY50034.1	Bacteroides nordii	997884	aliases:GTP CYCLOHYDROLASE 1 TYPE 2 HOMOLOG,HMPREF1068_02593,I9GSN0,I9GSN0_9BACE,YBGI/FAMILY DINUCLEAR METAL CENTER PROTEIN,EIY50034,EIY50034.1,GI:392656395,WP_007485656.1,392656395
742727.HMPREF9447_00215	EKU92558.1	Bacteroides oleiciplenus	742727	aliases:EKU92558.1,K9E7D2,32502659,425729707,WP_009127347.1,GI:425729707,GTP CYCLOHYDROLASE 1 TYPE 2 HOMOLOG,YBGI/FAMILY DINUCLEAR METAL CENTER PROTEIN,K9E7D2_9BACE,EKU92558,HMPREF9447_00215
411476.BACOVA_02603	EDO12098.1	Bacteroides ovatus	411476	aliases:GTP CYCLOHYDROLASE 1 TYPE 2 HOMOLOG,156110353,EDO12098,BACOVA_02603,INTERPRO:IPR002678,29453575,GI:156110353,WP_004295941.1,ALJ45426,DINUCLEAR METAL CENTER PROTEIN, YBGI FAMILY,A7LXN7,EDO12098.1,A7LXN7_BACO1,BOA:BOVATUS_00764,IPR002678
484018.BACPLE_00829	EDY96389.1	Bacteroides plebeius	484018	aliases:GI:198272120,IPR011322,B5CVU2,B5CVU2_BACPM,INTERPRO:IPR002678,WP_007558334.1,EDY96389.1,INTERPRO:IPR011322,DINUCLEAR METAL CENTER PROTEIN, YBGI FAMILY,198272120,GTP CYCLOHYDROLASE 1 TYPE 2 HOMOLOG,EDY96389,BACPLE_00829,IPR002678
1121100.JCM6294_3730	GAE20516.1	Bacteroides pyogenes	1121100	aliases:GI:567760489,WP_027325171.1,567760489,W4PL27,GAE20516,W4PL27_9BACE,JCM6294_3730,GTP CYCLOHYDROLASE 1 TYPE 2 HOMOLOG,GAE20516.1
1235813.JCM10003_2302	GAE22665.1	Bacteroides pyogenes	1235813	aliases:GTP CYCLOHYDROLASE 1 TYPE 2 HOMOLOG,JCM10003_2302,W4PSL1,GI:567224247,567224247,WP_021644449.1,W4PSL1_9BACE,GAE22665,GAE22665.1
667015.Bacsa_0647	Bacsa_0647	Bacteroides salanitronis	667015	aliases:F0R0K7_BACSH,GTP CYCLOHYDROLASE 1 TYPE 2 HOMOLOG,WP_013616698.1,324317352,GI:324317352,BSA:BACSA_0647,ADY35243,BACSA_0647,NGG1P INTERACTING FACTOR 3 PROTEIN, NIF3,ADY35243.1,F0R0K7
1121101.HMPREF1532_03295	EOA48792.1	Bacteroides salyersiae	1121101	aliases:GI:482600634,EOA48792,482600634,EOA48792.1,YBGI/FAMILY DINUCLEAR METAL CENTER PROTEIN,HMPREF1532_03295
1410608.JNKX01000027_gene2724	1410608.JNKX01000027_gene2724	Bacteroides sp.	1410608	aliases:JNKX01000027_GENE2724
585543.HMPREF0969_03234	EFA18565.1	Bacteroides sp.	585543	aliases:GTP CYCLOHYDROLASE 1 TYPE 2 HOMOLOG,D2F2I2,D2F2I2_9BACE,31505344,HMPREF0969_03234,EFA18565.1,DINUCLEAR METAL CENTER PROTEIN, YBGI FAMILY,270272702,EFA18565,WP_005827806.1,GI:270272702
1236514.BAKL01000057_gene3943	1236514.BAKL01000057_gene3943	Bacteroides stercorirosoris	1236514	aliases:A0A1M6FVP7_9BACE,BAKL01000057_GENE3943,GTP CYCLOHYDROLASE 1 TYPE 2 HOMOLOG,A0A1M6FVP7,SAMN05444350_11316
449673.BACSTE_01451	EDS16003.1	Bacteroides stercoris	449673	aliases:WP_005654212.1,EDS16003.1,B0NPN9_BACSE,INTERPRO:IPR011322,167699424,BACSTE_01451,B0NPN9,EDS16003,31796865,DINUCLEAR METAL CENTER PROTEIN, YBGI FAMILY,GTP CYCLOHYDROLASE 1 TYPE 2 HOMOLOG,GI:167699424,INTERPRO:IPR002678,IPR011322,IPR002678
226186.BT_0882	BT_0882	Bacteroides thetaiotaomicron	226186	aliases:BTH:BT_0882,AAO75989,GI:29338187,BT_0882,29338187,1072942,GTP CYCLOHYDROLASE 1 TYPE 2 HOMOLOG,AAO75989.1,Q8A9D3_BACTN,Q8A9D3,WP_008765714.1,NP_809795,PUTATIVE NIF3-RELATED PROTEIN,NP_809795.1
411479.BACUNI_02020	EDO54542.1	Bacteroides uniformis	411479	aliases:A7V376,EDO54542,GTP CYCLOHYDROLASE 1 TYPE 2 HOMOLOG,GI:156861111,A7V376_BACUC,BACUNI_02020,31505344,INTERPRO:IPR002678,DINUCLEAR METAL CENTER PROTEIN, YBGI FAMILY,156861111,EDO54542.1,WP_005827806.1,IPR002678
435590.BVU_3316	BVU_3316	Bacteroides vulgatus	435590	aliases:A6L5H8_BACV8,BVU_3316,ABR40942.1,5304277,GI:149934244,149934244,GTP CYCLOHYDROLASE 1 TYPE 2 HOMOLOG,ABR40942,WP_005842033.1,A6L5H8,BVU:BVU_3316
657309.BXY_04860	BXY_04860	Bacteroides xylanisolvens	657309	aliases:GTP CYCLOHYDROLASE 1 TYPE 2 HOMOLOG,BXY:BXY_04860,CBK65733,D6D6T8_9BACE,CONSERVED HYPOTHETICAL PROTEIN TIGR00486,GI:295084210,295084210,D6D6T8,CBK65733.1,BXY_04860
938709.AUSH02000069_gene1514	938709.AUSH02000069_gene1514	Bacteroidetes bacterium	938709	aliases:AUSH02000069_GENE1514
575590.HMPREF0156_01085	EFI17488.1	Bacteroidetes oral	575590	aliases:GTP CYCLOHYDROLASE 1 TYPE 2 HOMOLOG,GI:298275937,D7JEN9,WP_009217499.1,298275937,D7JEN9_9BACT,NIF3-RELATED PROTEIN,EFI17488.1,HMPREF0156_01085,EFI17488
9767.XP_007190673.1	NIF3L1	Balaenoptera acutorostrata	9767	aliases:594686391,XM_007190611.1,NGG1 INTERACTING FACTOR 3 LIKE 1,XP_007190673,GI:594686391,XP_007190673.1,103003821,PUTATIVE GTP CYCLOHYDROLASE 1 TYPE 2 NIF3L1,BACU:103003821,GENEID:103003821,NIF3L1
1121104.AQXH01000004_gene123	1121104.AQXH01000004_gene123	Balneola vulgaris	1121104	aliases:AQXH01000004_GENE123
742726.HMPREF9448_01635	EJZ63797.1	Barnesiella intestinihominis	742726	aliases:EJZ63797,404337343,YBGI/FAMILY DINUCLEAR METAL CENTER PROTEIN,K0WX33_9BACT,GTP CYCLOHYDROLASE 1 TYPE 2 HOMOLOG,HMPREF9448_01635,EJZ63797.1,K0WX33,GI:404337343
880074.BARVI_00670	AHF11609.1	Barnesiella viscericola	880074	aliases:W0EQW8,GTP CYCLOHYDROLASE 1 TYPE 2 HOMOLOG,BVS:BARVI_00670,BARVI_00670,AHF11609,WP_025277359.1,W0EQW8_9BACT,AHF11609.1,GI:570740849,YBGI/FAMILY DINUCLEAR METAL CENTER PROTEIN,570740849
1072685.IX83_00815	IX83_00815	Basilea psittacipulmonis	1072685	aliases:BPSI:IX83_00815,AIL32062.1,A0A077DF70_9BURK,IX83_00815,675107142,METAL-BINDING PROTEIN,AIL32062,GI:675107142,A0A077DF70,WP_038498058.1
109871.XP_006681609.1	BDEG_26653	Batrachochytrium dendrobatidis	109871	aliases:BATDE5_13924,A0A177WV10,575484630,INTERPRO:IPR002678,JGIDB:BATDE5_13924,GENEID:18236866,XM_006681546.1,XP_006681609,A0A177WV10_BATDE,XP_006681609.1,YBGI/FAMILY DINUCLEAR METAL CENTER PROTEIN,BDEG_26653,GI:575484630,BATDEDRAFT_13924,18236866,IPR002678
430998.XP_007677168.1	430998.XP_007677168.1	Baudoinia compniacensis	430998	aliases:XP_007677168.1,GENEID:19107743,M2NAB8,XM_007678978.1,627807641,XP_007677168,GI:627807641,19107743,INTERPRO:IPR002678,M2NAB8_BAUCO,BCOM:BAUCODRAFT_123091,BAUCODRAFT_123091,BAUCO1_123091,JGIDB:BAUCO1_123091,IPR002678
1121105.ATXL01000008_gene957	1121105.ATXL01000008_gene957	Bavariicoccus seileri	1121105	aliases:ATXL01000008_GENE957
176275.XP_008594630.1	176275.XP_008594630.1	Beauveria bassiana	176275	aliases:A0A0A2VS40,19884323,PROTEIN NIF3,XP_008594630.1,NGG1 INTERACTING FACTOR NIF3,GENEID:19884323,GI:667645597,A0A0A2VS40_BEABA,BBA_01311,XM_008596408.1,XP_008594630,667645597,BBAD15_G3979
866536.Belba_2249	Belba_2249	Belliella baltica	866536	aliases:BBD:BELBA_2249,GTP CYCLOHYDROLASE 1 TYPE 2 HOMOLOG,DINUCLEAR METAL CENTER PROTEIN, YBGI/SA1388 FAMILY,INTERPRO:IPR017221,I3Z6E7_BELBD,BELBA_2249,I3Z6E7,390417237,IPR017221,INTERPRO:IPR002678,AFL84815.1,IPR002678,WP_014772774.1,GI:390417237,AFL84815
883096.HMPREF9699_02045	EKB54233.1	Bergeyella zoohelcum	883096	aliases:K1LVW4,EKB54233,EKB54233.1,405580161,WP_002664548.1,GTP CYCLOHYDROLASE 1 TYPE 2 HOMOLOG,GI:405580161,HMPREF9699_02045,YBGI/FAMILY DINUCLEAR METAL CENTER PROTEIN,K1LVW4_9FLAO
1408164.MOLA814_02359	ESS13354.1	Betaproteobacteria bacterium	1408164	aliases:ESS13354,ESS13354.1,GI:557641145,MOLA814_02359,METAL-BINDING PROTEIN,V4XXM7_9PROT,WP_023473657.1,557641145,V4XXM7
471853.Bcav_1828	Bcav_1828	Beutenbergia cavernae	471853	aliases:GTP CYCLOHYDROLASE 1 TYPE 2 HOMOLOG,GI:229566233,WP_015882324.1,ACQ80084.1,229566233,C5C4V6_BEUC1,BCAV_1828,PROTEIN OF UNKNOWN FUNCTION DUF34,ACQ80084,BCV:BCAV_1828,C5C4V6
1235279.C772_02189	C772_02189	Bhargavaea cecembensis	1235279	aliases:GTP CYCLOHYDROLASE 1 TYPE 2 HOMOLOG,C772_02189,EMR05918.1,M7NBH1_9BACL,WP_008299931.1,M7NBH1,GI:470232885,470232885,EMR05918
1263831.F543_10560	AHG83920.1	Bibersteinia trehalosi	1263831	aliases:AHG83920,BTRH:F543_10560,F543_10560,GI:575451908,UPF0135 PROTEIN,575451908,AHG83920.1
1437605.BACT_0598	BACT_0598	Bifidobacterium actinocoloniiforme	1437605	aliases:672944154,BACT:AB656_01595,A0A086Z047_9BIFI,PUTATIVE NIF3 FAMILY PROTEIN,KFI39897.1,WP_051905239.1,KFI39897,A0A086Z047,BACT_0598,GI:672944154,AKV55160
1680.BADO_0725	BADO_0725	Bifidobacterium adolescentis	1680	aliases:A0A076JNE3,BADL:BADO_0725,BADO_0725,AII76146,GI:671342630,WP_038444386.1,AII76146.1,NIF3-RELATED PROTEIN,A0A076JNE3_BIFAD,671342630
518635.BIFANG_03129	EEP20858.1	Bifidobacterium angulatum	518635	aliases:BANG:BBAG_1003,229784744,BIFANG_03129,IPR002678,GI:229784744,C4FFL6,BAQ96625,GTP CYCLOHYDROLASE 1 TYPE 2 HOMOLOG,INTERPRO:IPR002678,EEP20858.1,C4FFL6_9BIFI,PUTATIVE DINUCLEAR METAL CENTER PROTEIN, YBGI FAMILY,EEP20858
552531.BIF_00613	BIF_00613	Bifidobacterium animalis	552531	aliases:BBB:BIF_00613,NIF3-RELATED PROTEIN,D3R5H0_BIFAB,289178748,D3R5H0,ADC85994.1,ADC85994,GI:289178748,BIF_00613
1147128.BAST_0932	BAST_0932	Bifidobacterium asteroides	1147128	aliases:WP_015021951.1,K4ILQ2,BAST_0932,BAST:BAST_0932,AFU71512.1,GI:408465983,AFU71512,CONSERVED HYPOTHETICAL PROTEIN WITH NIF3 (NGG1P INTERACTING FACTOR 3) DOMAIN,408465983,K4ILQ2_BIFAP
1437608.BBIA_2546	BBIA_2546	Bifidobacterium biavatii	1437608	aliases:A0A086Z5X5,KFI41925.1,BBIA_2546,672946192,KFI41925,GI:672946192,A0A086Z5X5_9BIFI,PADR FAMILY TRANSCRIPTIONAL REGULATOR
1437608.BBIA_2614	BBIA_2614	Bifidobacterium biavatii	1437608	aliases:KFI44488,GI:672948769,KFI44488.1,672948769,A0A086ZD88_9BIFI,A0A086ZD88,WP_035138527.1,PADR FAMILY TRANSCRIPTIONAL REGULATOR,BBIA_2614
398513.BBNG_00681	BBNG_00681	Bifidobacterium bifidum	398513	aliases:BBNG_00681,DINUCLEAR METAL CENTER PROTEIN, YBGI FAMILY,E4V942_BIFBI,E4V942,WP_003812738.1
702459.BBPR_0751	BBPR_0751	Bifidobacterium bifidum	702459	aliases:ADP35838.1,BBP:BBPR_0751,A0A0H3EC45,NIF3-RELATED PROTEIN,YP_003970875.1,BBPR_0751,WP_013389779.1,YP_003970875,ADP35838,GI:310866469,9888898,310866469,A0A0H3EC45_BIFBP
1437606.BBOH_0304	BBOH_0304	Bifidobacterium bohemicum	1437606	aliases:WP_074428494.1,GTP CYCLOHYDROLASE 1 TYPE 2 HOMOLOG,672951129,0005634,GO,GO:0005829,GO:0005634,GO,KFI46830,A0A086ZJY0_9BIFI,GI:672951129,A0A086ZJY0,NIF3 DOMAIN PROTEIN,BBOH_0304,0005829,KFI46830.1
1341695.BBOMB_0528	BBOMB_0528	Bifidobacterium bombi	1341695	aliases:GI:671259834,A0A080N2T0,671259834,NIF3 DOMAIN PROTEIN,A0A080N2T0_9BIFI,BBOMB_0528,KFF31191,KFF31191.1
326426.Bbr_0761	Bbr_0761	Bifidobacterium breve	326426	aliases:BBR_0761,F9XYJ6,F9XYJ6_BIFBU,GI:339478986,339478986,BBRU:BBR_0761,NIF3-RELATED PROTEIN,WP_015438669.1,ABE95447,ABE95447.1
1437609.BCAL_0094	BCAL_0094	Bifidobacterium callitrichos	1437609	aliases:GO:0005829,GO,KFI56501.1,0005829,GO,GI:672960946,GO:0005634,A0A087ACK1_9BIFI,672960946,BCAL_0094,KFI56501,GTP CYCLOHYDROLASE 1 TYPE 2 HOMOLOG,A0A087ACK1,PADR FAMILY TRANSCRIPTIONAL REGULATOR,0005634
566552.BIFCAT_01026	EEB22054.1	Bifidobacterium catenulatum	566552	aliases:212661479,BAR01677,EEB22054.1,INTERPRO:IPR002678,B6XTX8,WP_003835214.1,BCAT:BBCT_0709,BIFCAT_01026,DINUCLEAR METAL CENTER PROTEIN, YBGI FAMILY,EEB22054,GI:212661479,B6XTX8_9BIFI,IPR002678
35760.BCHO_1149	BCHO_1149	Bifidobacterium choerinum	35760	aliases:A0A087AEC0,BCHO_1149,672961576,KFI57120,0005829,GO,GO:0005634,GI:672961576,GO:0005829,GO,KFI57120.1,WP_024541278.1,PADR FAMILY TRANSCRIPTIONAL REGULATOR,0005634,A0A087AEC0_9BIFI
1687.BCOR_0786	BCOR_0786	Bifidobacterium coryneforme	1687	aliases:WP_051875657.1,AII74797,A0A076JDZ6,AII74797.1,NIF3-RELATED PROTEIN,0005829,GO,GO:0005634,GO:0005829,GO,A0A076JDZ6_9BIFI,BCOR_0786,BCOR:BCOR_0786,671341037,0005634,GI:671341037
327277.JHAL01000002_gene772	327277.JHAL01000002_gene772	Bifidobacterium crudilactis	327277	aliases:JHAL01000002_GENE772
1688.BCUN_0330	BCUN_0330	Bifidobacterium cuniculi	1688	aliases:WP_051920459.1,0045893,GI:672970386,GO:0005737,GO,A0A087B485_9BIFI,PUTATIVE NIF3 FAMILY PROTEIN,GO:0008134,GO,KFI65835,GO:0005515,GO,672970386,0005737,GO,0005515,GO,GO:0045893,0008134,GO,BCUN_0330,KFI65835.1,A0A087B485
401473.BDP_0992	BDP_0992	Bifidobacterium dentium	401473	aliases:ADB09635,D2Q9Z9_BIFDB,31606197,BDP_0992,283102529,BDE:BDP_0992,D2Q9Z9,WP_003840402.1,ADB09635.1,GI:283102529
561180.BIFGAL_02620	BGLCM_0883	Bifidobacterium gallicum	561180	aliases:PUTATIVE DINUCLEAR METAL CENTER PROTEIN, YBGI FAMILY,D1NS65,GI:270277663,PADR FAMILY TRANSCRIPTIONAL REGULATOR,EFA23517,WP_006294002.1,EFA23517.1,BGLCM_0883,INTERPRO:IPR002678,BIFGAL_02620,D1NS65_9BIFI,270277663,IPR002678
78344.BIGA_0481	BIGA_0481	Bifidobacterium gallinarum	78344	aliases:KFI61053.1,672965559,0005829,GO,GO:0005634,GO:0005829,GO,WP_033506205.1,PUTATIVE NIF3 FAMILY PROTEIN,A0A087AQK3_9BIFI,GI:672965559,BIGA_0481,0005634,A0A087AQK3,KFI61053
216816.GS08_03765	B5780_0636	Bifidobacterium longum	216816	aliases:AIF90283,666000526,ACJ52817,A0A1V8QIK0_BIFLN,B5780_0636,A0A1V8QIK0,BLN:BLON_1742,NIF3-LIKE DINUCLEAR METAL CENTER HEXAMERIC PROTEIN,AIF90283.1,PADR FAMILY TRANSCRIPTIONAL REGULATOR,GS08_03765,GI:666000526
1692.BMAGN_0631	BMAGN_0631	Bifidobacterium magnum	1692	aliases:A0A087BCK9_9BIFI,KFI68759,0005829,GO,BMAGN_0631,GO:0005829,GO,NIF3-LIKE PROTEIN,KFI68759.1,GI:672973355,672973355,A0A087BCK9,0005634,GO:0005634
78345.BMERY_1222	BMERY_1222	Bifidobacterium merycicum	78345	aliases:BMERY_1222,672976319,0005829,GO,GO:0005634,GO:0005829,GO,A0A087BKZ5,GI:672976319,KFI71695,KFI71695.1,WP_051914869.1,A0A087BKZ5_9BIFI,PADR FAMILY TRANSCRIPTIONAL REGULATOR,0005634
1693.BMIN_1399	BMIN_1399	Bifidobacterium minimum	1693	aliases:GTP CYCLOHYDROLASE 1 TYPE 2 HOMOLOG,0045893,KFI73304,GO:0008134,GO,GI:672977950,NIF3 DOMAIN,GO:0005515,GO,GO:0005737,GO,0005737,GO,672977950,0005515,GO,A0A087BQK4_9BIFI,0008134,GO,A0A087BQK4,KFI73304.1,WP_022861391.1,BMIN_1399,GO:0045893
1437603.BMON_0215	BMON_0215	Bifidobacterium mongoliense	1437603	aliases:BMON_0215,0005829,GO,GO:0005634,GO:0005829,GO,KFI80342,A0A087CAP2,KFI80342.1,672985078,GI:672985078,0005634,A0A087CAP2_9BIFI,PADR FAMILY TRANSCRIPTIONAL REGULATOR,WP_033511034.1
1435051.BMOU_0895	BMOU_0895	Bifidobacterium moukalabense	1435051	aliases:W4N9T2_9BIFI,575769949,WP_034875256.1,ETY71405,W4N9T2,GI:575769949,ETY71405.1,BMOU_0895,PADR FAMILY TRANSCRIPTIONAL REGULATOR
547043.BIFPSEUDO_03489	EEG70472.1	Bifidobacterium pseudocatenulatum	547043	aliases:BAR03444,EEG70472,C0BSX1_9BIFI,GI:225157133,INTERPRO:IPR002678,BIFPSEUDO_03489,BPSC:BBPC_0766,EEG70472.1,225157133,C0BSX1,PUTATIVE DINUCLEAR METAL CENTER PROTEIN, YBGI FAMILY,IPR002678
1690.BPSG_0787	BPSG_0787	Bifidobacterium pseudolongum	1690	aliases:A0A087C2C3,672982144,KFI77423.1,PADR FAMILY TRANSCRIPTIONAL REGULATOR,WP_026643176.1,GO:0005739,0005739,GO:0005737,GO,0005737,GO,KFI77423,BPSG_0787,GI:672982144,A0A087C2C3_9BIFI
31954.BPSP_0613	BPSP_0613	Bifidobacterium pseudolongum	31954	aliases:NIF3-LIKE PROTEIN,GO:0005829,GO,A0A087C9A1_9BIFI,0005829,GO,BPSP_0613,GO:0005634,A0A087C9A1,672984585,GI:672984585,WP_033488792.1,0005634,KFI79851,KFI79851.1
218140.BPSY_1696	BPSY_1696	Bifidobacterium psychraerophilum	218140	aliases:WP_033495411.1,672986034,0005829,GO,A0A087CDD8_9BIFI,GO:0005829,GO,KFI81288,PUTATIVE NIF3 FAMILY PROTEIN,A0A087CDD8,BPSY_1696,GI:672986034,KFI81288.1,0005634,GO:0005634
1437600.JDUI01000002_gene1364	BPULL_0307	Bifidobacterium pullorum	1437600	aliases:JDUI01000002_GENE1364,PUTATIVE NIF3 FAMILY PROTEIN,A0A087CNF9,A0A087CNF9_9BIFI,WP_043168701.1,BPULL_0307
1437610.BREU_1098	BREU_1098	Bifidobacterium reuteri	1437610	aliases:BREU_1098,KFI85914,0005829,GO,A0A087CRL4,GO:0005829,GO,GO:0005634,PUTATIVE NIF3 FAMILY PROTEIN,672990717,A0A087CRL4_9BIFI,KFI85914.1,0005634,GI:672990717,WP_044088518.1
78346.BRUM_0887	BRUM_0887	Bifidobacterium ruminantium	78346	aliases:GI:672994507,BRUM_0887,A0A087D2C6_9BIFI,NIF3-RELATED PROTEIN,0005829,GO,672994507,GO:0005634,GO:0005829,GO,KFI89676,KFI89676.1,WP_026645824.1,0005634,A0A087D2C6
158787.BSCA_0904	BSCA_0904	Bifidobacterium scardovii	158787	aliases:BSCA:BBSC_1396,KFI95087.1,673000010,GI:673000010,BAQ31476,A0A087DHT7_9BIFI,KFI95087,A0A087DHT7,PADR FAMILY TRANSCRIPTIONAL REGULATOR,BSCA_0904,WP_033517019.1
1394175.AWUN01000003_gene606	1394175.AWUN01000003_gene606	Bifidobacterium sp.	1394175	aliases:AWUN01000003_GENE606
1394176.AWUO01000004_gene944	1394176.AWUO01000004_gene944	Bifidobacterium sp.	1394176	aliases:AWUO01000004_GENE944
762211.BSTEL_0430	BSTEL_0430	Bifidobacterium stellenboschense	762211	aliases:A0A087DZR7_9BIFI,KFJ01018.1,673005989,BSTEL_0430,GI:673005989,A0A087DZR7,0005829,GO,GO:0005634,GO:0005829,GO,WP_051922766.1,PADR FAMILY TRANSCRIPTIONAL REGULATOR,0005634,KFJ01018
77635.BISU_0493	BISU_0493	Bifidobacterium subtile	77635	aliases:A0A087E9N5,673009488,KFJ04486,GI:673009488,KFJ04486.1,A0A087E9N5_9BIFI,BISU_0493,PADR FAMILY TRANSCRIPTIONAL REGULATOR
33905.BTHE_1125	BTHE_1125	Bifidobacterium thermophilum	33905	aliases:GI:673012376,KFJ07345.1,673012376,0005829,GO,GO:0005634,GO:0005829,GO,NIF3-RELATED PROTEIN,BTHE_1125,0005634,KFJ07345
356829.BITS_1046	BITS_1046	Bifidobacterium tsurumiense	356829	aliases:KFJ05909,0005829,GO,GO:0005634,GO:0005829,GO,673010927,NIF3 DOMAIN,BITS_1046,KFJ05909.1,A0A087EDQ8,A0A087EDQ8_9BIFI,0005634,WP_026641976.1,GI:673010927
563192.HMPREF0179_01521	EFV44620.1	Bilophila wadsworthia	563192	aliases:HMPREF0179_01521,WP_005026796.1,GI:316923414,YBGI/FAMILY DINUCLEAR METAL CENTER PROTEIN,E5Y5Q8_BILWA,316923414,EFV44620,E5Y5Q8,EFV44620.1
1408428.JNJP01000024_gene3761	1408428.JNJP01000024_gene3761	Bilophila wadsworthia	1408428	aliases:JNJP01000024_GENE3761
5016.M2VB13	5016.M2VB13	Bipolaris maydis	5016	aliases:M2VB13_COCH5,M2VB13,COCHEDRAFT_1083789
5016.M2SX00	5016.M2SX00	Bipolaris maydis	5016	aliases:M2SX00_COCH5,M2SX00,COCHEDRAFT_1022063
101162.XP_007689985.1	101162.XP_007689985.1	Bipolaris oryzae	101162	aliases:XP_007689985,19117725,W6Z0K2_COCMI,GI:627870121,GENEID:19117725,BOR:COCMIDRAFT_100694,JGIDB:COCMI1_100694,XP_007689985.1,COCMIDRAFT_100694,W6Z0K2,627870121,COCMI1_100694,XM_007691795.1
101162.XP_007682224.1	101162.XP_007682224.1	Bipolaris oryzae	101162	aliases:GI:627818769,19125540,XP_007682224.1,627818769,COCMIDRAFT_79751,BOR:COCMIDRAFT_79751,W7A5C4_COCMI,W7A5C4,GENEID:19125540,XP_007682224,XM_007684034.1,INTERPRO:IPR002678,COCMI1_79751,JGIDB:COCMI1_79751,IPR002678
45130.XP_007697567.1	45130.XP_007697567.1	Bipolaris sorokiniana	45130	aliases:GENEID:19138032,M2RIK0_COCSN,COCSA1_35061,628064652,19138032,XM_007699377.1,XP_007697567,COCSADRAFT_35061,JGIDB:COCSA1_35061,XP_007697567.1,M2RIK0,INTERPRO:IPR002678,GI:628064652,BSC:COCSADRAFT_35061,IPR002678
45130.XP_007698375.1	45130.XP_007698375.1	Bipolaris sorokiniana	45130	aliases:XP_007698375.1,628067216,GENEID:19138457,COCSADRAFT_35680,BSC:COCSADRAFT_35680,M2T8R7,JGIDB:COCSA1_35680,M2T8R7_COCSN,19138457,XM_007700185.1,GI:628067216,XP_007698375,COCSA1_35680
5017.XP_007713843.1	5017.XP_007713843.1	Bipolaris zeicola	5017	aliases:19146205,COCCA1_27518,GENEID:19146205,COCCADRAFT_27518,W6Y900,INTERPRO:IPR002678,XM_007715653.1,JGIDB:COCCA1_27518,XP_007713843.1,GI:628214583,W6Y900_COCCA,BZE:COCCADRAFT_27518,XP_007713843,628214583,IPR002678
5017.XP_007706887.1	5017.XP_007706887.1	Bipolaris zeicola	5017	aliases:JGIDB:COCCA1_32211,COCCADRAFT_32211,BZE:COCCADRAFT_32211,628183765,W6YM68,XP_007706887.1,XP_007706887,COCCA1_32211,GI:628183765,W6YM68_COCCA,19147151,XM_007708697.1,GENEID:19147151
1046627.BZARG_936	BZARG_936	Bizionia argentinensis	1046627	aliases:344048561,BZARG_936,EGV44167.1,G2EBQ7,EGV44167,NIF3 FAMILY PROTEIN,GTP CYCLOHYDROLASE 1 TYPE 2 HOMOLOG,WP_008635979.1,G2EBQ7_9FLAO,GI:344048561
1146883.BLASA_1988	BLASA_1988	Blastococcus saxobsidens	1146883	aliases:CONSERVED PROTEIN OF UNKNOWN FUNCTION,H6RR23,BLASA_1988,GI:378783234,BSD:BLASA_1988,H6RR23_BLASD,378783234,CCG02902.1,CCG02902
1380356.JNIK01000021_gene4585	1380356.JNIK01000021_gene4585	Blastococcus sp.	1380356	aliases:JNIK01000021_GENE4585
5039.XP_002629092.1	BDCG_08346	Blastomyces dermatitidis	5039	aliases:C5GW17,XP_002629092.1,NGG1 INTERACTING FACTOR NIF3,XP_002629092,8510779,GI:261203757,261203757,GENEID:8510779,XM_002629046.1,C5GW17_AJEDR,BDBG_00338,BDCG_08346
314230.DSM3645_12461	EAQ80831.1	Blastopirellula marina	314230	aliases:WP_002650388.1,A3ZRR2_9PLAN,EAQ80831,CDD:17042,EAQ80831.1,87288938,A3ZRR2,17042,DSM3645_12461,GI:87288938
1316444.K645_2231	K645_2231	Blattabacterium sp.	1316444	aliases:GTP CYCLOHYDROLASE 1 TYPE 2 HOMOLOG,K645_2231,BLU:K645_2231,WP_022565274.1,AGW86225.1,GI:546346595,U3QDH1_9FLAO,546346595,U3QDH1,AGW86225
1074889.MADAR_197	MADAR_197	Blattabacterium sp.	1074889	aliases:BMM:MADAR_197,G7SPQ3,GTP CYCLOHYDROLASE 1 TYPE 2 HOMOLOG,MADAR_197,354803398,AER40512.1,GI:354803398,G7SPQ3_9FLAO,WP_014158674.1,AER40512
1075399.BLBCPU_441	BLBCPU_441	Blattabacterium sp.	1075399	aliases:GTP CYCLOHYDROLASE 1 TYPE 2 HOMOLOG,PFAM:PF01784,BLBCPU_441,PF01784,GI:358377294,G8LQR4_9FLAO,WP_014246370.1,358377294,G8LQR4,AEU09482.1,AEU09482,BCP:BLBCPU_441
1229512.BPAA_170	BPAA_170	Blattabacterium sp.	1229512	aliases:460838261,GTP CYCLOHYDROLASE 1 TYPE 2 HOMOLOG,BAM99467,BPAA_170,WP_015429786.1,M4ZS03,BAM99467.1,BLP:BPAA_170,GI:460838261,M4ZS03_9FLAO
600809.BPLAN_167	BPLAN_167	Blattabacterium sp.	600809	aliases:261497346,ACX83796.1,GTP CYCLOHYDROLASE 1 TYPE 2 HOMOLOG,WP_012821324.1,D0J8X5,ACX83796,TIGR00486,TIGRFAM:TIGR00486,BPI:BPLAN_167,BPLAN_167,GI:261497346,D0J8X5_BLASP
331104.BLBBGE_473	BLBBGE_473	Blattabacterium sp.	331104	aliases:GTP CYCLOHYDROLASE 1 TYPE 2 HOMOLOG,D0JBE2_BLASB,GI:262272572,HYPOTHETICAL PROTEIN BLBBGE_473,BLBBGE_473,262272572,D0JBE2,BBL:BLBBGE_473,PF01784,PFAM:PF01784,ACY40480,ACY40480.1,WP_012840995.1
1186051.BGIGA_163	BGIGA_163	Blattabacterium sp.	1186051	aliases:GTP CYCLOHYDROLASE 1 TYPE 2 HOMOLOG,GI:387581836,AFJ90614.1,BBG:BGIGA_163,AFJ90614,387581836,I3QG79,I3QG79_9FLAO,BGIGA_163
537007.BLAHAN_05649	EEX21620.1	Blautia hansenii	537007	aliases:ASM69590,BLAHAN_05649,INTERPRO:IPR002678,C9L8C8_BLAHA,C9L8C8,GI:260541051,EEX21620,DINUCLEAR METAL CENTER PROTEIN, YBGI FAMILY,260541051,WP_003021115.1,BHAN:CGC63_08540,EEX21620.1,IPR002678
476272.RUMHYD_03095	EEG48012.1	Blautia hydrogenotrophica	476272	aliases:IPR002678,WP_005951010.1,INTERPRO:IPR002678,GI:225037766,C0CQE1,225037766,DINUCLEAR METAL CENTER PROTEIN, YBGI FAMILY,C0CQE1_9FIRM,RUMHYD_03095,EEG48012,EEG48012.1
33035.JPJF01000082_gene5169	33035.JPJF01000082_gene5169	Blautia producta	33035	aliases:JPJF01000082_GENE5169
33035.JPJF01000008_gene1205	33035.JPJF01000008_gene1205	Blautia producta	33035	aliases:JPJF01000008_GENE1205
1121115.AXVN01000005_gene2208	1121115.AXVN01000005_gene2208	Blautia wexlerae	1121115	aliases:ERS852478_02050,A0A174D0D1,AXVN01000005_GENE2208,METAL-BINDING PROTEIN,WP_008707629.1,ERS852523_00039,A0A174D0D1_9FIRM
7091.BGIBMGA006806-TA	LOC767622	Bombyx mori	7091	aliases:Q09GP9,ABI73988.1,767622,NM_001098275.1,UPI0000E13F14,NM_001098275,DQ904010,XP_012544674.1,PWY-6983,NP_001091745,LOC767622,PWY-6147,PWY-6703,UPA00848,BMOR:767622,NP_001091745.1,PWY-5664,Q09GP9_BOMMO,NIF3-LIKE PROTEIN,BGIBMGA006806-TA,BGIBMGA006806,BGIBMGA006806-RA,PWY-5663,PWY-7442,BMO.5667
360910.BAV3327	BAV3327	Bordetella avium	360910	aliases:Q2KTS3,UNIPROTKB/TREMBL:Q2KTS3,IPR002678,WP_012418964.1,Q2KTS3_BORA1,INTERPRO:IPR002678,YP_787822,YP_787822.1,CAJ50937,6266877,GENEID:6266877,BAV:BAV3327,GI:187479797,187479797,BAV3327
257310.BB4868	BB4868	Bordetella bronchiseptica	257310	aliases:BBR:BB4868,GI:33603841,33603841,A0A0H3LYB3,BB4868,2660656,CAE35231,GENEID:2660656,NP_891401,WP_010927226.1,NP_891401.1,A0A0H3LYB3_BORBR
1392838.AWNM01000010_gene2165	1392838.AWNM01000010_gene2165	Bordetella hinzii	1392838	aliases:PUTATIVE GTP CYCLOHYDROLASE 1 TYPE 2,29513228,WP_029577768.1,A0A0H4W6Q1_9BORD,A0A0H4W6Q1,AKQ57780,BHZ:ACR54_04505,AWNM01000010_GENE2165,ACR54_04505
1247649.D560_1561	D560_1561	Bordetella holmesii	1247649	aliases:D560_1561,AHV91813,GI:605568579,NIF3 FAMILY PROTEIN,BHO:D560_1561,AHV91813.1,605568579
257313.BP0279	BP0279	Bordetella pertussis	257313	aliases:Q7W078,33591515,WP_010927226.1,BP0279,NP_879159,NP_879159.1,Q7W078_BORPE,2664187,BPE:BP0279,GI:33591515,GENEID:2664187
568706.BN118_3448	BN118_3448	Bordetella pertussis	568706	aliases:BPER:BN118_3448,A0A0T7CTI5_BORP1,WP_010927226.1,CCJ64873,401779354,BN118_3448,A0A0T7CTI5,GI:401779354,CCJ64873.1
94624.Bpet0124	Bpet0124	Bordetella petrii	94624	aliases:BPET0124,INTERPRO:IPR002678,BPT:BPET0124,A9HW99,GI:163258156,CAP40455.1,A9HW99_BORPD,CAP40455,UNIPROTKB/TREMBL:A9HW99,163258156,IPR002678
1159870.KB907784_gene1360	1159870.KB907784_gene1360	Bordetella sp.	1159870	aliases:KB907784_GENE1360
123899.JPQP01000003_gene1361	123899.JPQP01000003_gene1361	Bordetella trematum	123899	aliases:SAMEA3906487_01086,A0A157MLL0_9BORD,JPQP01000003_GENE1361,METAL-BINDING PROTEIN,WP_025515005.1,A0A157MLL0,BTRM:SAMEA390648701086,SAI68097
390236.BafPKo_0486	AEL69694.1	Borrelia afzelii	390236	aliases:Q0SN38_BORAP,GI:342856846,Q0SN38,NIF3 FAMILY PROTEIN,ABH01740,342856846,AEL69694,BAFPKO_0486,WP_011601047.1,AEL69694.1,BAF:BAPKO_0497
1313293.BAN_0068100	AHH08448.1	Borrelia anserina	1313293	aliases:WP_025419648.1,BAN_0068100,GI:576100166,AHH08448,W5SPA5,AHH08448.1,NIF3-RELATED PROTEIN,576100166,W5SPA5_BORAN
521010.BbiDN127_0474	AEL18642.1	Borrelia bissettii	521010	aliases:G0ALR6,G0ALR6_BORBD,AEL18642.1,WP_014023699.1,NIF3 FAMILY PROTEIN,342222464,BBS:BBIDN127_0474,AEL18642,BBIDN127_0474,GI:342222464
1313292.BCO_0068100	AHH10650.1	Borrelia coriaceae	1313292	aliases:576093753,BCO_0068100,W5SUN1_9SPIR,NIF3-RELATED PROTEIN,WP_025408093.1,W5SUN1,AHH10650,AHH10650.1,GI:576093753
412419.BDU_472	BDU_472	Borrelia duttonii	412419	aliases:UNCHARACTERIZED CONSERVED PROTEIN,GI:201083822,ACH93413,B5RM27_BORDL,B5RM27,BDU_472,201083822,WP_012538224.1,ACH93413.1,BDU:BDU_472
290434.BG0481	BG0481	Borrelia garinii	290434	aliases:GI:51573295,Q661F1_BORBP,AAU07320.1,BG0481,51573295,BGA:BG0481,WP_011193790.1,Q661F1,AAU07320
314723.BH0468	BH0468	Borrelia hermsii	314723	aliases:BHR:BH0468,WP_043924444.1,A0A142JBB3,AAX16978.1,NIF3-LIKE DINUCLEAR METAL CENTER HEXAMERIC PROTEIN,A0A142JBB3_BORHE,NIF3-RELATED PROTEIN,A0V01_01970,119861183,BH0468,AAX16978,GI:119861183
1302858.I871_02490	AGT27444.1	Borrelia miyamotoi	1302858	aliases:I871_02490,AXH25_02325,AGT27444,A0A1D8TDH3,530348214,GI:530348214,WP_020954844.1,AGT27444.1,NIF3-LIKE DINUCLEAR METAL CENTER HEXAMERIC PROTEIN,BMO:I871_02490,A0A1D8TDH3_9SPIR
1313294.BPA_0099600	AHH09462.1	Borrelia parkeri	1313294	aliases:GI:576098914,BPA_0099600,576098914,AHH09462.1,NIF3-RELATED PROTEIN,W5SRG3_BORPR,W5SRG3,AHH09462
1417230.AYOT01000146_gene1914	1417230.AYOT01000146_gene1914	Borrelia persica	1417230	aliases:AYOT01000146_GENE1914
498742.BSPA14S_0481	EEF84297.1	Borrelia spielmanii	498742	aliases:EEF84297.1,BSPA14S_0481,B9X8N5,EEF84297,224513975,B9X8N5_9SPIR,WP_006433928.1,GI:224513975
314724.BT0468	BT0468	Borrelia turicatae	314724	aliases:A1QZQ5,GI:119862029,AAX17797,NIF3-RELATED PROTEIN,BT0468,A1QZQ5_BORT9,BTU:BT0468,AAX17797.1,119862029
445987.BVAVS116_0476	EEF81887.1	Borrelia valaisiana	445987	aliases:EEF81887,EEF81887.1,D6RXV5_BORVA,BVAVS116_0476,224511481,GI:224511481,WP_006068693.1,D6RXV5
1398491.P613_02395	AIJ29825.1	Borrelia valaisiana	1398491	aliases:P613_02395,BVT:P613_02395,AIJ29825,AIJ29825.1,672590844,GI:672590844
72004.XP_005909889.1	NIF3L1	Bos mutus	72004	aliases:LOW QUALITY PROTEIN: NIF3-LIKE PROTEIN 1,BOM:102282146,NGG1 INTERACTING FACTOR 3 LIKE 1,XP_005909889,XP_005909889.1,GI:555996300,555996300,XM_005909827.1,102282146,GENEID:102282146,NIF3L1
9913.ENSBTAP00000024331	NIF3L1	Bos taurus	9913	aliases:XP_005202675.1,XP_005202674.1,509473,ENSBTAT00000024331,UPI00004F14B2,XP_005202673.1,AAI22597.1,ENSBTAG00000018282,NM_001080249.2,NM_001080249,BC122596,NIF3L_BOVIN,XP_005202673,NIF3-LIKE PROTEIN 1,XP_005202675,XP_005202674,NIF3L1,NP_001073718,BT.89946,NGG1 INTERACTING FACTOR 3 LIKE 1,ENSBTAT00000024332,BTA:509473,Q05B89,BOS TAURUS NIF3 NGG1 INTERACTING FACTOR 3-LIKE 1 (S. POMBE) (NIF3L1),…
40559.M7UL76	40559.M7UL76	Botrytis cinerea	40559	aliases:G2XRG4_BOTF4,BFU:BC1G_13962,XP_001547631,M7UL76_BOTF1,SIMILAR TO NIF3 NGG1 INTERACTING FACTOR 3-LIKE 1,G2XRG4,M7UL76,BOFUT4_P067400.1
446465.Bfae_16660	Bfae_16660	Brachybacterium faecium	446465	aliases:C7MD34,BFAE_16660,WP_015775700.1,ACU85491.1,YP_003155081,256559644,GI:256559644,C7MD34_BRAFD,YP_003155081.1,ACU85491,BFA:BFAE_16660,UNCHARACTERIZED CONSERVED PROTEIN,8400212
1064537.AGSO01000010_gene2518	1064537.AGSO01000010_gene2518	Brachybacterium paraconglomeratum	1064537	aliases:AGSO01000010_GENE2518
396014.BF93_06410	BF93_06410	Brachybacterium phenoliresistens	396014	aliases:EWS82659,GI:586888422,BF93_06410,EWS82659.1,586888422,Z9JWV2_9MICO,Z9JWV2
1074488.AGBX01000007_gene1636	1074488.AGBX01000007_gene1636	Brachybacterium squillarum	1074488	aliases:AGBX01000007_GENE1636
1121116.KB894767_gene2226	1121116.KB894767_gene2226	Brachymonas chironomi	1121116	aliases:KB894767_GENE2226
565034.BHWA1_00354	ACN82854.1	Brachyspira hyodysenteriae	565034	aliases:BHY:BHWA1_00354,C0QXY2,ACN82854,GI:225214120,BHWA1_00354,ACN82854.1,225214120,WP_012669906.1,C0QXY2_BRAHW
1045858.Bint_1344	Bint_1344	Brachyspira intermedia	1045858	aliases:G0EP93_BRAIP,AEM21963,BIP:BINT_1344,GI:343386473,G0EP93,AEM21963.1,343386473,WP_014487792.1,BINT_1344
526224.Bmur_0175	Bmur_0175	Brachyspira murdochii	526224	aliases:D5U4N7_BRAM5,BRM:BMUR_0175,ADG70282,ADG70282.1,BMUR_0175,GI:296017045,WP_013112713.1,296017045,D5U4N7
759914.BP951000_2203	ADK32176.1	Brachyspira pilosicoli	759914	aliases:ADK32176.1,GI:300689505,WP_013245125.1,ADK32176,BP951000_2203,NIF3 DOMAIN PROTEIN,D8IA46_BRAP9,D8IA46,300689505,BPO:BP951000_2203
7739.XP_002605883.1	7739.XP_002605883.1	Branchiostoma floridae	7739	aliases:C3YCU2,GENEID:7243253,GI:260821123,260821123,INTERPRO:IPR002678,XP_002605883,BFO:BRAFLDRAFT_87445,7243253,NIF3-LIKE PROTEIN 1,XP_002605883.1,BRAFLDRAFT_87445,XM_002605837.1,C3YCU2_BRAFL,IPR002678
598467.BrE312_3117	EHD22485.1	Brenneria sp.	598467	aliases:GI:353676452,353676452,INTERPRO:IPR002678,G7LQ82,NGG1P INTERACTING FACTOR 3 PROTEIN, NIF3,G7LQ82_9GAMM,WP_009113784.1,BRE312_3117,EHD22485,EHD22485.1,IPR002678
1444309.JAQG01000080_gene3974	1444309.JAQG01000080_gene3974	Brevibacillus borstelensis	1444309	aliases:JAQG01000080_GENE3974
1444309.JAQG01000015_gene1626	1444309.JAQG01000015_gene1626	Brevibacillus borstelensis	1444309	aliases:JAQG01000015_GENE1626
1200792.AKYF01000009_gene3268	1200792.AKYF01000009_gene3268	Brevibacillus brevis	1200792	aliases:GTP CYCLOHYDROLASE 1 TYPE 2 HOMOLOG,WP_048032304.1,A0A0J6EGZ0_BREBE,AKYF01000009_GENE3268,A0A0J6EGZ0,AB432_07730
358681.BBR47_20810	yqfO	Brevibacillus brevis	358681	aliases:BBE:BBR47_20810,GTP CYCLOHYDROLASE 1 TYPE 2 HOMOLOG,WP_012685787.1,29259386,C0ZB99,BAH43058.1,226094616,BBR47_20810,GI:226094616,YQFO,C0ZB99_BREBN,BAH43058
1042163.BRLA_c014320	AIG25771.1	Brevibacillus laterosporus	1042163	aliases:PUTATIVE GTP CYCLOHYDROLASE 1 TYPE 2,A0A075R2Z2,GTP CYCLOHYDROLASE 1 TYPE 2 HOMOLOG,GI:666896094,AIG25771,BRLA_C014320,666896094,A0A075R2Z2_BRELA,34877096,BLR:BRLA_C014320,WP_003338173.1,AIG25771.1
1121121.KB894329_gene2948	1121121.KB894329_gene2948	Brevibacillus laterosporus	1121121	aliases:KB894329_GENE2948
1118054.CAGW01000068_gene1874	1118054.CAGW01000068_gene1874	Brevibacillus massiliensis	1118054	aliases:CAGW01000068_GENE1874
1118054.CAGW01000017_gene4386	1118054.CAGW01000017_gene4386	Brevibacillus massiliensis	1118054	aliases:CAGW01000017_GENE4386
1408254.T458_03440	T458_03440	Brevibacillus panacihumi	1408254	aliases:GTP CYCLOHYDROLASE 1 TYPE 2 HOMOLOG,558620164,WP_023554759.1,EST56371,EST56371.1,GI:558620164,T458_03440,V6MCU3,V6MCU3_9BACL
1408254.T458_14190	T458_14190	Brevibacillus panacihumi	1408254	aliases:WP_023556731.1,T458_14190,V6M838,V6M838_9BACL,558618215,EST54437,EST54437.1,GI:558618215
1229781.C272_02965	C272_02965	Brevibacterium casei	1229781	aliases:EKU49660.1,425482503,EKU49660,C272_02965,GI:425482503,K9B7A1,K9B7A1_9MICO
321955.AAGP01000051_gene3602	BLSMQ_1937	Brevibacterium linens	321955	aliases:BLIN:BLSMQ_1937,AOP53647,AAGP01000051_GENE3602,A0A1D7W3K0_BRELN,A0A1D7W3K0,BLSMQ_1937,YBGI
1176165.CAJD01000015_gene907	1176165.CAJD01000015_gene907	Brevibacterium massiliense	1176165	aliases:CAJD01000015_GENE907
585530.HMPREF0183_1654	EFG47134.1	Brevibacterium mcbrellneri	585530	aliases:GI:294971244,HMPREF0183_1654,D4YNZ4_9MICO,EFG47134,DINUCLEAR METAL CENTER PROTEIN, YBGI FAMILY,EFG47134.1,294971244,WP_005884847.1,D4YNZ4
1033736.CAHK01000003_gene2566	1033736.CAHK01000003_gene2566	Brevibacterium senegalense	1033736	aliases:CAHK01000003_GENE2566
1381751.JAJB01000054_gene73	1381751.JAJB01000054_gene73	Brevibacterium sp.	1381751	aliases:JAJB01000054_GENE73
1340493.JNIF01000003_gene2612	1340493.JNIF01000003_gene2612	Bryobacter aggregatus	1340493	aliases:JNIF01000003_GENE2612
89462.XP_006080566.1	NIF3L1	Bubalus bubalis	89462	aliases:102408760,XP_006080566,XM_006080504.1,NIF3-LIKE PROTEIN 1 ISOFORM X1,XP_006080566.1,GI:594115770,GENEID:102408760,NIF3L1,594115770
107806	BU301	Buchnera aphidicola	107806	aliases:1110000,GTP CYCLOHYDROLASE 1 TYPE 2 HOMOLOG,BUC:BU301,P57387,NP_240124.1,NP_240124,YBGI,10038975,WP_009874254.1,GCH1L_BUCAI,BU301
198804.BUsg_291	ybgI	Buchnera aphidicola	198804	aliases:BUSG_291,GCH1L_BUCAP,GTP CYCLOHYDROLASE 1 TYPE 2 HOMOLOG,AAM67846,AAM67846.1,21623195,WP_011053813.1,Q8K9N4,GI:21623195,HYPOTHETICAL 26.9 KDAPROTEIN,YBGI,BAS:BUSG_291
1009858.BUMPG002_CDS00296	ybgi	Buchnera aphidicola	1009858	aliases:GI:575428924,AHG61234.1,AHG61234,575428924,BAPG:BUMPG002_CDS00296,YBGI,BUMPG002_CDS00296
224915.bbp_279	ybgI	Buchnera aphidicola	224915	aliases:AAO27004.1,GCH1L_BUCBP,27904171,Q89AJ8,WP_011091405.1,GTP CYCLOHYDROLASE 1 TYPE 2 HOMOLOG,BBP_279,GI:27904171,YBGI,AAO27004,BAB:BBP_279
1005057.BUAMB_282	ybgI	Buchnera aphidicola	1005057	aliases:AEO08098,AEO08098.1,WP_014500002.1,CONSERVED METAL-BINDING PROTEIN,GI:345539231,G2LPG1_BUCUM,G2LPG1,YBGI,BUAMB_282,345539231,BUH:BUAMB_282
1005090.BAKON_303	ybgI	Buchnera aphidicola	1005090	aliases:BAK:BAKON_303,BAKON_303,GI:345538676,WP_014499453.1,AEO08653,CONSERVED METAL-BINDING PROTEIN,G2LN15_9GAMM,G2LN15,YBGI,AEO08653.1,345538676
372461.BCc_183	ybgI	Buchnera aphidicola	372461	aliases:ABJ90655,PUTATIVE HYDROLASE-OXIDASE,BCC_183,ABJ90655.1,YBGI,Q057P4,BCC:BCC_183,116256973,GI:116256973,Q057P4_BUCCC
261317.BCTU_193	ybgI	Buchnera aphidicola	261317	aliases:BAJ:BCTU_193,F7WZB7_9GAMM,PUTATIVE HYDROLASE OXIDASE,AEH39778.1,GI:335345232,335345232,F7WZB7,AEH39778,BCTU_193,YBGI
1111728.ATYS01000016_gene4610	1111728.ATYS01000016_gene4610	Budvicia aquatica	1111728	aliases:ATYS01000016_GENE4610
1218074.BAXZ01000027_gene4735	1218074.BAXZ01000027_gene4735	Burkholderia acidipaludis	1218074	aliases:BAXZ01000027_GENE4735
339670.Bamb_0358	Bamb_0358	Burkholderia ambifaria	339670	aliases:115280401,GI:115280401,INTERPRO:IPR002678,ABI85918.1,Q0BIV5_BURCM,ABI85918,BAMB_0358,PROTEIN OF UNKNOWN FUNCTION DUF34,Q0BIV5,BAM:BAMB_0358,WP_011655806.1,IPR002678
1218075.BAYA01000022_gene5141	1218075.BAYA01000022_gene5141	Burkholderia bannensis	1218075	aliases:BAYA01000022_GENE5141
1169143.KB911047_gene5484	1169143.KB911047_gene5484	Burkholderia bryophila	1169143	aliases:KB911047_GENE5484
216591.BCAL0327	BCAL0327	Burkholderia cenocepacia	216591	aliases:WP_006485336.1,198034770,INTERPRO:IPR002678,CAR50637,CAR50637.1,UNIPROTKB/TREMBL:B4E650,GI:198034770,BCAL0327,B4E650_BURCJ,BCJ:BCAL0327,B4E650,IPR002678
292.DM42_1381	WI67_01990	Burkholderia cepacia	292	aliases:WI67_01990,A0A103KP78,685661897,AIO49024.1,A0A103KP78_BURCE,GI:685661897,WL94_16005,NIF3 FAMILY PROTEIN,BCED:DM42_1381,DM42_1381,METAL-BINDING PROTEIN,AIO49024,WP_048026516.1
948106.AWZT01000013_gene953	948106.AWZT01000013_gene953	Burkholderia dilworthii	948106	aliases:AWZT01000013_GENE953
1218076.BAYB01000028_gene4648	1218076.BAYB01000028_gene4648	Burkholderia ferrariae	1218076	aliases:BAYB01000028_GENE4648
999541.bgla_1g03910	AEA59085.1	Burkholderia gladioli	999541	aliases:BGD:BGLA_1G03910,GI:327367729,WP_013696446.1,AEA59085.1,F2LI08_BURGS,AEA59085,F2LI08,327367729,BGLA_1G03910
626418.bglu_1g03460	ACR27547.1	Burkholderia glumae	626418	aliases:ACR27547.1,237875214,NIF3 FAMILY PROTEIN,WP_012734440.1,BGLU_1G03460,GI:237875214,BGL:BGLU_1G03460,C5A9P6,ACR27547,C5A9P6_BURGB
1071679.BG57_13525	BG57_13525	Burkholderia grimmiae	1071679	aliases:KDR31204,GI:646759028,KDR31204.1,A0A069NUB2_9BURK,METAL-BINDING PROTEIN,WP_035967704.1,BG57_13525,646759028,A0A069NUB2
243160.BMA2699	BMA2699	Burkholderia mallei	243160	aliases:YP_104220.1,3091097,AIO51299,GI:52427674,52427674,AAU48267.1,WP_004202811.1,AAU48267,CONSERVED HYPOTHETICAL PROTEIN TIGR00486,A0A0H2WFL4,BMAL:DM55_1217,A0A0H2WFL4_BURMA,BMA2699
1038869.AXAN01000030_gene3974	1038869.AXAN01000030_gene3974	Burkholderia mimosarum	1038869	aliases:AXAN01000030_GENE3974
395019.Bmul_0343	Bmul_0343	Burkholderia multivorans	395019	aliases:BAG44796,A0A0H3KRU5_BURM1,BMULJ_02911,INTERPRO:IPR002678,BMJ:BMULJ_02911,ABX14038.1,BMUL_0343,A0A0H3KRU5,ABX14038,PROTEIN OF UNKNOWN FUNCTION DUF34,GI:160340952,160340952,WP_012212593.1,IPR002678
1121127.JAFA01000023_gene7258	1121127.JAFA01000023_gene7258	Burkholderia nodosa	1121127	aliases:JAFA01000023_GENE7258
342113.DM82_2823	DM82_2823	Burkholderia oklahomensis	342113	aliases:AIO65682.1,DM82_2823,AIO65682,NIF3 FAMILY PROTEIN,A0A088WVC1,A0A088WVC1_9BURK,WP_010106850.1,GI:685678562,BOK:DM82_2823,685678562
1229205.BUPH_06274	BUPH_06274	Burkholderia phenoliruptrix	1229205	aliases:AFT87276,AFT87276.1,K0DMF7_9BURK,WP_015003866.1,K0DMF7,BPX:BUPH_06274,BUPH_06274,407237077,GI:407237077
391038.Bphy_2744	Bphy_2744	Burkholderia phymatum	391038	aliases:B2JHX0,INTERPRO:IPR002678,ACC71916.1,27742437,BPH:BPHY_2744,GI:184193951,WP_012402114.1,ACC71916,B2JHX0_PARP8,PROTEIN OF UNKNOWN FUNCTION DUF34,184193951,BPHY_2744,IPR002678
398527.Bphyt_3545	Bphyt_3545	Burkholderia phytofirmans	398527	aliases:ACD17935.1,BPHYT_3545,BPY:BPHYT_3545,B2SZ50,INTERPRO:IPR002678,WP_012434494.1,GI:187716711,187716711,ACD17935,B2SZ50_PARPJ,PROTEIN OF UNKNOWN FUNCTION DUF34,IPR002678
1434929.X946_5722	ybgI	Burkholderia pseudomallei	1434929	aliases:KGR93116,BOC41_01825,AIV77450,A0A069BBP3_BURPE,NIF3 FAMILY PROTEIN,NIF3-LIKE DINUCLEAR METAL CENTER HEXAMERIC PROTEIN,DP49_86,BOC42_12300,A0A069BBP3,WP_004202811.1,GI:705462805,ERS012350_05236,DP46_1936,KGR93116.1,YBGI,705462805,BUT:X994_3010,X946_5722
272560.BPSL3124	BPSL3124	Burkholderia pseudomallei	272560	aliases:52211145,CAH37134.1,GI:52211145,BPS:BPSL3124,INTERPRO:IPR002678,CAH37134,YP_109717.1,YP_109717,Q63QA1_BURPS,WP_004202811.1,BPSL3124,3092039,UNIPROTKB/TREMBL:Q63QA1,Q63QA1,IPR002678
882378.RBRH_02278	RBRH_02278	Burkholderia rhizoxinica	882378	aliases:RBRH_02278,BRH:RBRH_02278,NIF3-RELATED PROTEIN,GI:312167642,CBW74645,CBW74645.1,E5APW3_PARRH,312167642,E5APW3,WP_013434874.1
159450.NH14_22530	NH14_22530	Burkholderia sacchari	159450	aliases:KHD18986,WP_035531623.1,723581743,GI:723581743,A0A0A6SU73_9BURK,NH14_22530,METAL-BINDING PROTEIN,KHD18986.1,A0A0A6SU73
196367.JNFG01000049_gene1626	196367.JNFG01000049_gene1626	Burkholderia sordidicola	196367	aliases:JNFG01000049_GENE1626,BSU04_44085,A0A226WLA1_9BURK,A0A226WLA1
1458357.BG58_23895	BG58_23895	Burkholderia sp.	1458357	aliases:GI:620642592,WP_035506603.1,A0A038GSL5_9BURK,KAK44496,METAL-BINDING PROTEIN,A0A038GSL5,620642592,BG58_23895,KAK44496.1
640511.BC1002_2804	ADG16852.1	Burkholderia sp.	640511	aliases:D5W534,295437682,ADG16852,INTERPRO:IPR002678,BC1002_2804,GI:295437682,ADG16852.1,D5W534_BURSC,BGE:BC1002_2804,PROTEIN OF UNKNOWN FUNCTION DUF34,WP_013090684.1,IPR002678
640512.BC1003_3145	ADN59092.1	Burkholderia sp.	640512	aliases:E1TAR3_BURSG,WP_013340663.1,ADN59092,307585694,BGF:BC1003_3145,PROTEIN OF UNKNOWN FUNCTION DUF34,E1TAR3,INTERPRO:IPR002678,GI:307585694,ADN59092.1,BC1003_3145,IPR002678
640510.BC1001_3184	ADX56598.1	Burkholderia sp.	640510	aliases:WP_013589761.1,ADX56598,E8YGK5,INTERPRO:IPR002678,ADX56598.1,GI:323384507,PROTEIN OF UNKNOWN FUNCTION DUF34,323384507,BUG:BC1001_3184,IPR002678,BC1001_3184,E8YGK5_9BURK
1500897.JQNA01000002_gene2438	1500897.JQNA01000002_gene2438	Burkholderia sp.	1500897	aliases:JQNA01000002_GENE2438
944435.AXAJ01000014_gene2004	944435.AXAJ01000014_gene2004	Burkholderia sp.	944435	aliases:AXAJ01000014_GENE2004
667632.KB890170_gene3688	667632.KB890170_gene3688	Burkholderia sp.	667632	aliases:KB890170_GENE3688
1192124.LIG30_3992	LIG30_3992	Burkholderia sp.	1192124	aliases:A0A063B8G0,KDB06586.1,WP_038714893.1,LIG30_3992,INTERPRO:IPR002678,KDB06586,GI:632868896,NGG1P INTERACTING FACTOR 3 PROTEIN, NIF3,632868896,A0A063B8G0_9BURK,IPR002678
1472716.KBK24_0113650	KFX64914.1	Burkholderia sp.	1472716	aliases:KBK24_0113650,KFX64914,GI:680269922,680269922,METAL-BINDING PROTEIN,KFX64914.1
1097668.BYI23_A023580	AET90196.1	Burkholderia sp.	1097668	aliases:G8M8N0,AET90196,G8M8N0_9BURK,BYI:BYI23_A023580,WP_014192406.1,AET90196.1,357936637,BYI23_A023580,GI:357936637
1218084.BBJK01000090_gene5961	1218084.BBJK01000090_gene5961	Burkholderia terrae	1218084	aliases:A0A244DVI1_9BURK,BBJK01000090_GENE5961,CA603_11050,A0A244DVI1,NIF3-LIKE DINUCLEAR METAL CENTER HEXAMERIC PROTEIN,WP_007731817.1
269482.Bcep1808_0419	ABO53431.1	Burkholderia vietnamiensis	269482	aliases:134137688,INTERPRO:IPR002678,A4JAX8,A4JAX8_BURVG,GI:134137688,ABO53431,ABO53431.1,BCEP1808_0419,BVI:BCEP1808_0419,PROTEIN OF UNKNOWN FUNCTION DUF34,IPR002678
266265.Bxe_A0413	Bxe_A0413	Burkholderia xenovorans	266265	aliases:ABE32520.1,GI:91689320,Q13TR9,91689320,Q13TR9_PARXL,BXE:BXE_A0413,PROTEIN OF UNKNOWN FUNCTION DUF34,ABE32520,BXE_A0413,WP_011489982.1,4006005
469610.HMPREF0189_01336	EFL83973.1	Burkholderiales bacterium	469610	aliases:D9Y2G2,EFL83973,GI:302860898,D9Y2G2_9BURK,WP_008810141.1,HMPREF0189_01336,DINUCLEAR METAL CENTER PROTEIN, YBGI FAMILY,EFL83973.1,302860898
864051.BurJ1DRAFT_1227	EHR70100.1	Burkholderiales bacterium	864051	aliases:374665315,GI:374665315,EHR70100,DINUCLEAR METAL CENTER PROTEIN, YBGI/SA1388 FAMILY,INTERPRO:IPR002678,H5WHG8_9BURK,H5WHG8,EHR70100.1,BURJ1DRAFT_1227,WP_009549245.1,IPR002678
1006004.GBAG_2858	GBAG_2858	Buttiauxella agrestis	1006004	aliases:GI:668962670,KFC80160.1,668962670,APC-0003058,WP_034497207.1,GBAG_2858,A0A085G8W5_9ENTR,ASAP:APC-0003058,A0A085G8W5,KFC80160
1203606.HMPREF1526_00599	EOQ39902.1	Butyricicoccus pullicaecorum	1203606	aliases:R8W9S7_9CLOT,EOQ39902,WP_016146805.1,EOQ39902.1,500581271,YBGI/FAMILY DINUCLEAR METAL CENTER PROTEIN,GI:500581271,R8W9S7,HMPREF1526_00599
1121129.KB903371_gene255	1121129.KB903371_gene255	Butyricimonas synergistica	1121129	aliases:KB903371_GENE255
511680.BUTYVIB_01545	EFF68274.1	Butyrivibrio crossotus	511680	aliases:EFF68274,WP_005603198.1,INTERPRO:IPR002678,BUTYVIB_01545,D4S0C6,GI:292809069,DINUCLEAR METAL CENTER PROTEIN, YBGI FAMILY,292809069,EFF68274.1,D4S0C6_9FIRM,IPR002678
1280696.ATVY01000013_gene2395	1280696.ATVY01000013_gene2395	Butyrivibrio fibrisolvens	1280696	aliases:DINUCLEAR METAL CENTER PROTEIN, YBGI/SA1388 FAMILY,ATVY01000013_GENE2395,WP_022753618.1,A0A1H9X5G2,SAMN04487884_1449,A0A1H9X5G2_BUTFI
1280671.AUJH01000023_gene3631	1280671.AUJH01000023_gene3631	Butyrivibrio sp.	1280671	aliases:AUJH01000023_GENE3631
1280673.AUJJ01000016_gene780	1280673.AUJJ01000016_gene780	Butyrivibrio sp.	1280673	aliases:AUJJ01000016_GENE780
1280685.AUKC01000041_gene2282	1280685.AUKC01000041_gene2282	Butyrivibrio sp.	1280685	aliases:AUKC01000041_GENE2282
1280686.AUKE01000022_gene273	1280686.AUKE01000022_gene273	Butyrivibrio sp.	1280686	aliases:AUKE01000022_GENE273
1280676.AUJO01000005_gene422	1280676.AUJO01000005_gene422	Butyrivibrio sp.	1280676	aliases:AUJO01000005_GENE422
1408304.JAHA01000005_gene896	1408304.JAHA01000005_gene896	Butyrivibrio sp.	1408304	aliases:JAHA01000005_GENE896
264951.V5FCQ5	PVAR5_3453	Byssochlamys spectabilis	264951	aliases:PVAR5_3453,V5FCQ5_BYSSN,NGG1 INTERACTING FACTOR NIF3, PUTATIVE,V5FCQ5
986075.CathTA2_1021	EGL83423.1	Caldalkalibacillus thermarum	986075	aliases:EGL83423,GTP CYCLOHYDROLASE 1 TYPE 2 HOMOLOG,INTERPRO:IPR002678,F5L5F8,GI:334180832,NGG1P INTERACTING FACTOR 3 PROTEIN, NIF3,F5L5F8_9BACI,CATHTA2_1021,EGL83423.1,WP_007503738.1,IPR002678,334180832
273068.TTE1753	TTE1753	Caldanaerobacter subterraneus	273068	aliases:GTP CYCLOHYDROLASE 1 TYPE 2 HOMOLOG,TTE:TTE1753,GI:20516764,20516764,AAM24947.1,Q8R972,Q8R972_CALS4,AAM24947,TTE1753
935948.KE386493_gene2427	935948.KE386493_gene2427	Caldanaerobius polysaccharolyticus	935948	aliases:KE386493_GENE2427
521460.Athe_1619	Athe_1619	Caldicellulosiruptor bescii	521460	aliases:GTP CYCLOHYDROLASE 1 TYPE 2 HOMOLOG,IPR002678,222456451,31772970,INTERPRO:IPR002678,WP_015908052.1,ATE:ATHE_1619,ACM60713.1,GI:222456451,B9MK55_CALBD,PROTEIN OF UNKNOWN FUNCTION DUF34,ACM60713,ATHE_1619,B9MK55
632292.Calhy_1133	Calhy_1133	Caldicellulosiruptor hydrothermalis	632292	aliases:GTP CYCLOHYDROLASE 1 TYPE 2 HOMOLOG,CALHY_1133,311777368,WP_013403034.1,INTERPRO:IPR002678,GI:311777368,E4Q8K9_CALH1,ADQ06854,IPR017221,ADQ06854.1,CHD:CALHY_1133,E4Q8K9,PROTEIN OF UNKNOWN FUNCTION DUF34,IPR002678,INTERPRO:IPR017221
632335.Calkr_1632	Calkr_1632	Caldicellulosiruptor kristjanssonii	632335	aliases:WP_013432889.1,GTP CYCLOHYDROLASE 1 TYPE 2 HOMOLOG,INTERPRO:IPR017221,312180955,ADQ41125,E4SA40_CALKI,PROTEIN OF UNKNOWN FUNCTION DUF34,GI:312180955,INTERPRO:IPR002678,CALKR_1632,IPR017221,E4SA40,CKI:CALKR_1632,ADQ41125.1,IPR002678
608506.COB47_0963	COB47_0963	Caldicellulosiruptor obsidiansis	608506	aliases:COB47_0963,GI:302574476,GTP CYCLOHYDROLASE 1 TYPE 2 HOMOLOG,D9TJT5_CALOO,WP_013290267.1,INTERPRO:IPR002678,D9TJT5,COB:COB47_0963,INTERPRO:IPR017221,IPR017221,IPR002678,PROTEIN OF UNKNOWN FUNCTION DUF34,302574476,ADL42267,ADL42267.1
632518.Calow_1363	Calow_1363	Caldicellulosiruptor owensensis	632518	aliases:GTP CYCLOHYDROLASE 1 TYPE 2 HOMOLOG,INTERPRO:IPR017221,ADQ04915.1,INTERPRO:IPR002678,PROTEIN OF UNKNOWN FUNCTION DUF34,GI:311775428,CALOW_1363,E4Q2H3,WP_013412279.1,ADQ04915,IPR017221,311775428,IPR002678,E4Q2H3_CALOW,COW:CALOW_1363
351627.Csac_1732	Csac_1732	Caldicellulosiruptor saccharolyticus	351627	aliases:ABP67319,145410315,WP_011917253.1,A4XK84_CALS8,INTERPRO:IPR002678,PROTEIN OF UNKNOWN FUNCTION DUF34,A4XK84,CSC:CSAC_1732,GTP CYCLOHYDROLASE 1 TYPE 2 HOMOLOG,ABP67319.1,CSAC_1732,GI:145410315,IPR002678
1304880.JAGB01000001_gene718	1304880.JAGB01000001_gene718	Caldicoprobacter oshimai	1304880	aliases:JAGB01000001_GENE718
1304880.JAGB01000001_gene281	1304880.JAGB01000001_gene281	Caldicoprobacter oshimai	1304880	aliases:JAGB01000001_GENE281
926550.CLDAP_28700	BAM00910.1	Caldilinea aerophila	926550	aliases:I0I6M2,GI:381384093,381384093,CAP:CLDAP_28700,WP_014434137.1,CLDAP_28700,I0I6M2_CALAS,BAM00910,BAM00910.1
1265502.KB905938_gene2456	1265502.KB905938_gene2456	Caldimonas manganoxidans	1265502	aliases:KB905938_GENE2456
511051.CSE_10920	CSE_10920	Caldisericum exile	511051	aliases:GTP CYCLOHYDROLASE 1 TYPE 2 HOMOLOG,381364389,CSE_10920,BAL81218.1,I0GKD1_CALEA,BAL81218,CEX:CSE_10920,I0GKD1,GI:381364389
768670.Calni_1341	Calni_1341	Calditerrivibrio nitroreducens	768670	aliases:GTP CYCLOHYDROLASE 1 TYPE 2 HOMOLOG,GI:312940057,ADR19249,PROTEIN OF UNKNOWN FUNCTION DUF34,CNI:CALNI_1341,WP_013451461.1,ADR19249.1,312940057,E4TJQ3_CALNY,CALNI_1341,E4TJQ3
880073.Calab_1129	Cabys_4001	Caldithrix abyssi	880073	aliases:APF20746,DINUCLEAR METAL CENTER PROTEIN, YBGI/SA1388 FAMILY,H1XWH5,EHO40757,CABYS_4001,371718986,NGG1P INTERACTING FACTOR 3 PROTEIN, NIF3,CALAB_1129,GI:371718986,INTERPRO:IPR002678,EHO40757.1,H1XWH5_9BACT,CABY:CABYS_4001,WP_006927788.1,IPR002678
9483.ENSCJAP00000052247	9483.ENSCJAP00000052247	Callithrix jacchus	9483	aliases:UPI000206C801,ENSCJAG00000033566,NIF3-LIKE PROTEIN 1,ENSCJAP00000052247,ACFV01022398,ENSCJAT00000061820,F7IJ64,F7IJ64_CALJA
9483.ENSCJAP00000042002	NIF3L1	Callithrix jacchus	9483	aliases:XM_002749619,ENSCJAP00000042002,XP_002749665.1,ENSCJAG00000004400,ENSCJAP00000044839,XP_008997425.1,100392322,XM_002749619.2,XP_002749665,NIF3-LIKE PROTEIN 1,F6S431_CALJA,CJC:100392322,UPI0001D3E71B,ENSCJAT00000008431,ENSCJAT00000008437,F7DHH6,ENSCJAP00000007977,NIF3L1,F6S431,UPI0001C9EBAF,NGG1 INTERACTING FACTOR 3 LIKE 1,F6Z8D3,UPI0001D3E71A,ENSCJAT00000061714,ENSCJAP00000007980,ENSCJAT0…
857293.CAAU_1230	CAAU_1230	Caloramator australicus	857293	aliases:397161758,CCJ33314,CCJ33314.1,I7K702,WP_008908584.1,I7K702_9CLOT,PROTEIN OF UNKNOWN FUNCTION DUF34,CAAU_1230,GI:397161758
857293.CAAU_1047	CAAU_1047	Caloramator australicus	857293	aliases:CAAU_1047,I7J4W2_9CLOT,CCJ33131.1,CCJ33131,WP_008908403.1,I7J4W2,GI:397162039,397162039,FIG146262: HYPOTHETICAL PROTEIN
1031288.AXAA01000039_gene80	1031288.AXAA01000039_gene80	Caloramator sp.	1031288	aliases:AXAA01000039_GENE80
1031288.AXAA01000011_gene662	1031288.AXAA01000011_gene662	Caloramator sp.	1031288	aliases:AXAA01000011_GENE662
1170562.Cal6303_3417	AFZ02352.1	Calothrix sp.	1170562	aliases:428236562,AFZ02352,WP_015198980.1,INTERPRO:IPR002678,NGG1P INTERACTING FACTOR 3 PROTEIN, NIF3,K9V4I7_9CYAN,CAL6303_3417,AFZ02352.1,K9V4I7,GI:428236562,CALT:CAL6303_3417,IPR002678
1337936.IJ00_22985	IJ00_21780	Calothrix sp.	1337936	aliases:CALH:IJ00_21780,IJ00_21780,AKG23560,668697622,GI:668697622,A0A0T7BWX0_9CYAN,A0A0T7BWX0,KFB85409.1,KFB85409,WP_035156674.1,IJ00_22985
32057.KB217478_gene3996	32057.KB217478_gene3996	Calothrix sp.	32057	aliases:KB217478_GENE3996
32057.KB217478_gene7467	32057.KB217478_gene7467	Calothrix sp.	32057	aliases:KB217478_GENE7467
99598.Cal7507_5967	AFY36277.1	Calothrix sp.	99598	aliases:K9PUR2,INTERPRO:IPR002678,CALO:CAL7507_5967,CAL7507_5967,K9PUR2_9CYAN,NGG1P INTERACTING FACTOR 3 PROTEIN, NIF3,GI:427353553,AFY36277.1,IPR002678,427353553,WP_015132066.1,AFY36277
1367491.BN865_14020c	CDG57595.1	Campylobacter coli	1367491	aliases:GTP CYCLOHYDROLASE 1 TYPE 2,CDG57595,GI:532690356,BN865_14020C,FIG137478: HYPOTHETICAL PROTEIN,CCOO:ATE51_02212,31369413,3.5.4.16,CDG57595.1,UNIPROTKB/TREMBL:T2LJT9,IPR002678,T2LJT9,ATE51_02212,GOA:T2LJT9,A0A0Q2HFB2_CAMCO,532690356,ALU99625,CC14983A_1167,A0A0Q2HFB2,INTERPRO:IPR002678,WP_002776487.1,EC 3.5.4.16
1242969.ATCC51562_269	ERJ26310.1	Campylobacter concisus	1242969	aliases:ATCC51562_269,U2F8L2,ERJ26310.1,3.5.4.16,543207132,CCOC:CCON33237_0885,ALF47567,ERJ26310,WP_021090704.1,U2F8L2_9PROT,GI:543207132,EC 3.5.4.16
360104.CCC13826_1438	EAT98265.2	Campylobacter concisus	360104	aliases:EC 3.5.4.16,A7ZDY5,EAT98265.2,3.5.4.16,GI:157101506,EAT98265,WP_012139923.1,A7ZDY5_CAMC1,CCC13826_1438,157101506,CCO:CCC13826_1438
1121267.JHZL01000004_gene1592	CCUN_0860	Campylobacter cuniculorum	1121267	aliases:CCUN_0860,3.5.4.16,A0A1W6BWL6,ARJ56471,WP_027306492.1,A0A1W6BWL6_9PROT,CCUN:CCUN_0860,JHZL01000004_GENE1592,EC 3.5.4.16
983328.AFGH01000026_gene329	983328.AFGH01000026_gene329	Campylobacter fetus	983328	aliases:AFGH01000026_GENE329
1244528.CFT03427_1025	AGZ81885.1	Campylobacter fetus	1244528	aliases:AGZ81885.1,CFT12S05168_02530,WP_065838739.1,A0A1C0XA93_CAMFE,3.5.4.16,HYPOTHETICAL PROTEIN (NIF3 DOMAIN),CFT03427_1025,A0A1C0XA93,AGZ81885,556854408,CAMP:CFT03427_1025,EC 3.5.4.16,GI:556854408
360106.CFF8240_1046	ABK83106.1	Campylobacter fetus	360106	aliases:118414686,ABK83106,WP_011732059.1,3.5.4.16,CFF:CFF8240_1046,A0RPS7,CFF8240_1046,ABK83106.1,A0RPS7_CAMFF,GI:118414686,EC 3.5.4.16
553220.CAMGR0001_2868	EEV16492.1	Campylobacter gracilis	553220	aliases:CAMGR0001_2868,C8PL77_9PROT,3.5.4.16,DINUCLEAR METAL CENTER PROTEIN, YBGI FAMILY,AKT93141,CGRA:CGRAC_1721,EEV16492.1,GI:257441346,C8PL77,257441346,EEV16492,EC 3.5.4.16,WP_005873164.1
360107.CHAB381_0707	ABS52267.1	Campylobacter hominis	360107	aliases:CHA:CHAB381_0707,GI:153805260,A7I197,3.5.4.16,153805260,WP_012108575.1,CHAB381_0707,ABS52267,A7I197_CAMHC,EC 3.5.4.16,ABS52267.1
354242.CJJ81176_0728	EAQ72420.1	Campylobacter jejuni	354242	aliases:A0A0H3P9L3,87249460,3.5.4.16,CJV:MTVDSCJ20_0727,A0A0H3P9L3_CAMJJ,WP_002854814.1,EAQ72420,AII24448,CONSERVED HYPOTHETICAL PROTEIN TIGR00486,GI:87249460,EAQ72420.1,CJJ81176_0728,EC 3.5.4.16
683083.C414_000040032	EFC33274.1	Campylobacter jejuni	683083	aliases:GI:283794534,EFC33274.1,3.5.4.16,D2MWJ8,CJV:MTVDSCJ20_0727,D2MWJ8_CAMJU,AII24448,283794534,C414_000040032,EFC33274,EC 3.5.4.16
192222.Cj0705	Cj0705	Campylobacter jejuni	192222	aliases:905024,WP_002852315.1,GTP CYCLOHYDROLASE 1 TYPE 2 HOMOLOG,CAL34842.1,3.5.4.16,CJV:MTVDSCJ20_0727,YP_002344123.1,CAL34842,Q0PAH4,UNIPROTKB/SWISS-PROT:Q9PPK2,Q9PPK2,AII24448,GCH1L_CAMJE,INTERPRO:IPR002678,GI:112360050,CONSERVED HYPOTHETICAL PROTEIN CJ0705,IPR002678,112360050,EC 3.5.4.16,CJ0705
306263.Cla_1001	Cla_1001	Campylobacter lari	306263	aliases:CLA_1001,GI:222539223,3.5.4.16,WP_012661707.1,ACM64324.1,222539223,B9KCN5,7410736,CONSERVED HYPOTHETICAL PROTEIN (NIF3 DOMAIN PROTEIN),CLA:CLA_1001,B9KCN5_CAMLR,ACM64324,EC 3.5.4.16
553218.CAMRE0001_2767	EEF14412.1	Campylobacter rectus	553218	aliases:B9D0W7,EEF14412,EEF14412.1,DINUCLEAR METAL CENTER PROTEIN, YBGI FAMILY,GI:222879319,CAMRE0001_2767,222879319,WP_004319119.1,B9D0W7_CAMRE
1244083.CSUNSWCD_1526	EKU11776.1	Campylobacter showae	1244083	aliases:CSUNSWCD_1526,EKU11776.1,EKU11776,421960171,WP_009494139.1,M5IRF7_9PROT,M5IRF7,GI:421960171
553219.CAMSH0001_1475	EET80747.1	Campylobacter showae	553219	aliases:255301490,EET80747.1,CAMSH0001_1475,EET80747,WP_002946302.1,C6RCN6_9PROT,DINUCLEAR METAL CENTER PROTEIN, YBGI FAMILY,GI:255301490,C6RCN6
1448857.JFAP01000004_gene696	1448857.JFAP01000004_gene696	Campylobacter sp.	1448857	aliases:JFAP01000004_GENE696
1244531.CIG1485E_0738	AII14584.1	Campylobacter sp.	1244531	aliases:AII14584,WP_038453811.1,AII14584.1,CAJ:CIG1485E_0738,A0A076FFF0,3.5.4.16,HYPOTHETICAL PROTEIN (NIF3 DOMAIN),EC 3.5.4.16,669188131,CIG1485E_0738,GI:669188131,A0A076FFF0_9PROT
1548153.LR59_01325	KGI57389.1	Campylobacter sp.	1548153	aliases:LR59_01325,KGI57389,693439818,KGI57389.1,GI:693439818
32024.JMTI01000004_gene1898	32024.JMTI01000004_gene1898	Campylobacter sputorum	32024	aliases:JMTI01000004_GENE1898
306264.CUP0555	CUP0555	Campylobacter upsaliensis	306264	aliases:WP_004275483.1,GI:57016626,Q4HRF3,CUP0555,EAL53410,EAL53410.1,CONSERVED HYPOTHETICAL PROTEIN TIGR00486,Q4HRF3_CAMUP,57016626
827.JFJK01000001_gene847	827.JFJK01000001_gene847	Campylobacter ureolyticus	827	aliases:HMPREF9309_00099,3.5.4.16,CURE:CUREO_0377,WP_016645955.1,JFJK01000001_GENE847,AKT90256,YBGI/FAMILY DINUCLEAR METAL CENTER PROTEIN,S3YP60_9PROT,S3YP60,EC 3.5.4.16
5476.C4YGP7	NIF3	Candida albicans	5476	aliases:C4YGP7_CANAW,A0A1D8PMG0_CANAL,ORF19.4406,CAL:CAALFM_C405960WA,XP_019330936.1,3646527,A0A1D8PMG0,C4YGP7,CAO19.4406,CAALFM_C405960WA,NIF3,NIF3P,XP_019330936,PUTATIVE GTP CYCLOHYDROLASE 1 TYPE 2 OS=CANDIDA ALBICANS (STRAIN WO-1) GN=CAWG_03228 PE=3 SV=1
42374.XP_002420195.1	CD36_45520	Candida dubliniensis	42374	aliases:XP_002420195,XM_002420150.1,B9WGP2,GI:241954948,NGG1-INTERACTING FACTOR ORTHOLOGUE, PUTATIVE,8047641,CDU:CD36_45520,CD36_45520,241954948,XP_002420195.1,GENEID:8047641,B9WGP2_CANDC
5478.XP_447552.1	5478.XP_447552.1	Candida glabrata	5478	aliases:GI:50290241,Q6FQE2,CAGL0I06963G,50290241,GENEID:2889060,Q6FQE2_CANGA,XM_447552.1,2889060,CGR:CAGL0I06963G,XP_447552.1,XP_447552
5479.M3JXF8	G210_2634	Candida maltosa	5479	aliases:PUTATIVE GTP CYCLOHYDROLASE 1 TYPE 2 OS=CANDIDA MALTOSA (STRAIN XU316) GN=G210_2634 PE=3 SV=1,NGG1-INTERACTING FACTOR-LIKE PROTEIN, PUTATIVE,M3JXF8_CANMX,M3JXF8,G210_2634
273371.XP_003867324.1	273371.XP_003867324.1	Candida orthopsilosis	273371	aliases:UNIPROTKB/TREMBL:H8X0J7,XP_003867324.1,NIF3 PROTEIN,448515388,GI:448515388,INTERPRO:IPR002678,H8X0J7,14538931,GENEID:14538931,CORT_0B01670,XM_003867276.1,COT:CORT_0B01670,XP_003867324,H8X0J7_CANO9,IPR002678
5480.G8BHK2	5480.G8BHK2	Candida parapsilosis	5480	aliases:G8BHK2_CANPC,G8BHK2,CPAR2_501520
45596.XP_006685318.1	45596.XP_006685318.1	Candida tenuis	45596	aliases:G3B1R6,GI:575512095,XM_006685255.1,XP_006685318.1,INTERPRO:IPR002678,XP_006685318,18248749,NGG1P INTERACTING FACTOR 3,CTEN:CANTEDRAFT_120060,CANTE1_120060,GENEID:18248749,JGIDB:CANTE1_120060,CANTEDRAFT_120060,G3B1R6_CANTC,575512095,IPR002678
5482.XP_002549601.1	CTRG_03898	Candida tropicalis	5482	aliases:C5MCE7_CANTT,XP_002549601,CTRG_03898,C5MCE7,255729352,GENEID:8297953,XM_002549555.1,NGG1-INTERACTING FACTOR 3,GI:255729352,8297953,XP_002549601.1,CTP:CTRG_03898
522306.CAP2UW1_4047	ACV37289.1	Candidatus Accumulibacter	522306	aliases:ACV37289.1,APP:CAP2UW1_4047,INTERPRO:IPR002678,PROTEIN OF UNKNOWN FUNCTION DUF34,CAP2UW1_4047,257048101,C7RNA3_ACCPU,ACV37289,GI:257048101,WP_015768455.1,C7RNA3,IPR002678
1454004.AW11_01506	AW11_01506	Candidatus Accumulibacter	1454004	aliases:EXI89415.1,EXI89415,AW11_01506,GI:589618216,METAL-BINDING PROTEIN,A0A011QK86,589618216,A0A011QK86_9PROT
1211813.CAPH01000013_gene401	1211813.CAPH01000013_gene401	Candidatus Alistipes	1211813	aliases:CAPH01000013_GENE401
452471.Aasi_0427	Aasi_0427	Candidatus Amoebophilus	452471	aliases:189497296,GTP CYCLOHYDROLASE 1 TYPE 2 HOMOLOG,ACE05843,B3ERJ1_AMOA5,AAS:AASI_0427,B3ERJ1,AASI_0427,WP_012472606.1,ACE05843.1,GI:189497296
1081644.IMCC13023_09810	EIC91428.1	Candidatus Aquiluna	1081644	aliases:383298813,I0R0P2_9MICO,I0R0P2,IMCC13023_09810,EIC91428,EIC91428.1,GI:383298813
1041504.RATSFB_0444	BAK81006.1	Candidatus Arthromitus	1041504	aliases:G2IGS8,BAK81006.1,GI:346985331,WP_014094469.1,NIF3 FAMILY PROTEIN,RATSFB_0444,BAK81006,G2IGS8_9CLOT,ASB:RATSFB_0444,346985331
1508644.SFBmNL_00577	AID44485.1	Candidatus Arthromitus	1508644	aliases:ASO:SFBMNL_00577,SFBMNL_00577,GI:657170248,AID44485.1,657170248,AID44485
1029718.SFBM_0538	SFBM_0538	Candidatus Arthromitus	1029718	aliases:GI:342329674,342329674,WP_005806671.1,F9VJK8,SFBM_0538,ASF:SFBM_0538,BAK56316.1,BAK56316,F9VJK8_ARTSS
511995.CFPG_045	CFPG_045	Candidatus Azobacteroides	511995	aliases:GI:212548640,BAG83308.1,GTP CYCLOHYDROLASE 1 TYPE 2 HOMOLOG,APS:CFPG_045,212548640,B6YQ36_AZOPC,CFPG_045,B6YQ36,BAG83308,WP_012573069.1
186490.IM45_224	IM45_224	Candidatus Baumannia	186490	aliases:A0A088MXA5,AIN46995,IM45_224,684176039,WP_038497904.1,AIN46995.1,GI:684176039,A0A088MXA5_9GAMM
1211815.CBYP010000013_gene3578	1211815.CBYP010000013_gene3578	Candidatus Blastococcus	1211815	aliases:CBYP010000013_GENE3578
459349.CLOAM0382	CLOAM0382	Candidatus Cloacimonas	459349	aliases:CAO80287.1,GTP CYCLOHYDROLASE 1 TYPE 2 HOMOLOG,WP_015424148.1,B0VEY9,GOA:B0VEY9,B0VEY9_CLOAI,IPR004323,167729376,CLOAM0382,INTERPRO:IPR002678,CAO80287,GI:167729376,CACI:CLOAM0382,UNIPROTKB/TREMBL:B0VEY9,INTERPRO:IPR004323,IPR002678
1211817.CCAT010000043_gene3460	1211817.CCAT010000043_gene3460	Candidatus Clostridium	1211817	aliases:CCAT010000043_GENE3460
1211817.CCAT010000003_gene278	1211817.CCAT010000003_gene278	Candidatus Clostridium	1211817	aliases:CCAT010000003_GENE278
477974.Daud_1375	Daud_1375	Candidatus Desulforudis	477974	aliases:WP_012302469.1,B1I475_DESAP,B1I475,169638378,GI:169638378,DAUD_1375,ACA59884.1,DAU:DAUD_1375,ACA59884,INTERPRO:IPR006025,IPR006025
477974.Daud_0497	Daud_0497	Candidatus Desulforudis	477974	aliases:WP_012301632.1,DAU:DAUD_0497,DAUD_0497,PROTEIN OF UNKNOWN FUNCTION DUF34,B1I1T3_DESAP,INTERPRO:IPR002678,B1I1T3,GI:169637537,169637537,IPR002678,ACA59043,ACA59043.1
1070319.CAGGBEG34_240070	CCD29496.1	Candidatus Glomeribacter	1070319	aliases:347816509,CAGGBEG34_240070,G2J9P9,GI:347816509,G2J9P9_9BURK,WP_006682685.1,CONSERVED HYPOTHETICAL PROTEIN DUF34,CCD29496,CCD29496.1
1324957.K933_14093	K933_14093	Candidatus Halobonum	1324957	aliases:K933_14093,GI:556696168,V4IW62,ESP87412.1,ESP87412,V4IW62_9EURY,556696168,DINUCLEAR METAL CENTER PROTEIN, YBGI/SA1388 FAMILY
572265.HDEF_1278	HDEF_1278	Candidatus Hamiltonella	572265	aliases:ACQ67930.1,WP_015873721.1,GI:229466156,HDEF_1278,PF0178,ACQ67930,C4K5T7,229466156,HDE:HDEF_1278,PFAM:PF0178,C4K5T7_HAMD5
1427984.X271_00330	X271_00330	Candidatus Hepatoplasma	1427984	aliases:GI:588284982,HCR:X271_00330,X271_00330,NIF3 FAMILY PROTEIN,AHK22436,AHK22436.1,588284982,W8GN54_9MOLU,W8GN54
1208918.CDEE_0225	CDEE_0225	Candidatus Kinetoplastibacterium	1208918	aliases:WP_015238860.1,M1L3L0,CDEE_0225,GI:451776319,451776319,AGF47318,PUTATIVE METAL-BINDING PROTEIN,AGF47318.1,KCT:CDEE_0225,M1L3L0_9PROT
1208919.CDSE_0221	CDSE_0221	Candidatus Kinetoplastibacterium	1208919	aliases:M1LQY5_9PROT,CDSE_0221,M1LQY5,AGF46576,AGF46576.1,GI:451775535,WP_015395987.1,KDE:CDSE_0221,451775535
1208920.CONE_0217	CONE_0217	Candidatus Kinetoplastibacterium	1208920	aliases:AGF48046,M1LVC6_9PROT,GI:451777071,CONE_0217,AGF48046.1,NIF3 FAMILY METAL-BINDING PROTEIN,KON:CONE_0217,451777071,WP_015396734.1,M1LVC6
1208921.ST1E_0242	ST1E_0242	Candidatus Kinetoplastibacterium	1208921	aliases:451777792,M1MA08_9PROT,GI:451777792,KGA:ST1E_0242,AGF48740,M1MA08,ST1E_0242,AGF48740.1
1208923.CKBE_00180	AFZ83369.1	Candidatus Kinetoplastibacterium	1208923	aliases:GI:429338947,AFZ83369,AFZ83369.1,429338947,CKBE_00180,KBL:CKBE_00180,NGG1P INTERACTING FACTOR 3 FAMILY PROTEIN
204669.Acid345_2075	ABF41076.1	Candidatus Koribacter	204669	aliases:WP_011522877.1,GI:94551152,ABA:ACID345_2075,ABF41076,ABF41076.1,ACID345_2075,Q1IPX4_KORVE,94551152,Q1IPX4
1236689.MMALV_10410	AGI85776.1	Candidatus Methanomethylophilus	1236689	aliases:AGI85776.1,GI:477555136,477555136,M9SBT5,MAX:MMALV_10410,WP_015504923.1,AGI85776,MMALV_10410,M9SBT5_METAX,15139864
1318617.MGM1_2410	MGM1_2410	Candidatus Mycoplasma	1318617	aliases:AIV03617,AIV03617.1,MGJ:MGM1_2410,701169168,NIF3 FAMILY PROTEIN,GI:701169168,A0A097SSP1_9MOLU,MGM1_2410,A0A097SSP1
1459636.NTE_02754	NTE_02754	Candidatus Nitrososphaera	1459636	aliases:AIF84795.1,A0A075MUC9,AIF84795,NTE_02754,A0A075MUC9_9ARCH,NEV:NTE_02754,665995035,GI:665995035
28176.CF66_2307	O1U_0124	Candidatus Photodesmus	28176	aliases:O1U_0124,CF66_2307,S3DKL6_9GAMM,KEY90611.1,GI:666453415,S3DKL6,666453415,KEY90611,NIF3
1179155.CF67_04203	CF67_04203	Candidatus Photodesmus	1179155	aliases:CF67_04203,A0A084CN01,A0A084CN01_9GAMM,WP_034414655.1,KEY91180,GI:666454077,666454077,KEY91180.1
669502.SSDC_00825	SSDC_00825	Candidatus Profftella	669502	aliases:AGS06856,AGS06856.1,SSDC:SSDC_00825,S5RLQ9,527122331,GI:527122331,S5RLQ9_9PROT,SSDC_00825
264201.pc1173	pc1173	Candidatus Protochlamydia	264201	aliases:PCU:PC1173,Q6MC02_PARUW,CAF23897,Q6MC02,PC1173,UNIPROTKB/TREMBL:Q6MC02,INTERPRO:IPR002678,GI:46400448,CAF23897.1,46400448,IPR002678
663321.REG_0972	REG_0972	Candidatus Regiella	663321	aliases:GI:304283611,E0WSN7_9ENTR,PFAM:PF01784,NIF3 DOMAIN-CONTAINING HYPOTHETICAL PROTEIN,E0WSN7,REG_0972,EFL92006.1,PF01784,EFL92006,304283611
529884.Rhola_00006570	AIC47465.1	Candidatus Rhodoluna	529884	aliases:A0A060JFD6_9MICO,A0A060JFD6,DINUCLEAR METAL CENTER PROTEIN, YBGI/SA1388 FAMILY,RLA:RHOLA_00006570,AIC47465,649018715,WP_038502314.1,RHOLA_00006570,AIC47465.1,GI:649018715
413404.Rmag_0952	Rmag_0952	Candidatus Ruthia	413404	aliases:A1AXK4_RUTMC,A1AXK4,INTERPRO:IPR002678,ABL02661,ABL02661.1,GI:118567856,PROTEIN OF UNKNOWN FUNCTION DUF34,WP_011738286.1,RMAG_0952,RMA:RMAG_0952,118567856,IPR002678
1387197.AWGA01000020_gene375	1387197.AWGA01000020_gene375	Candidatus Schmidhempelia	1387197	aliases:AWGA01000020_GENE375
2342.SOPEG_0683	ybgI	Candidatus Sodalis	2342	aliases:PES:SOPEG_0683,GI:573017660,AHF73197,W0HL14_9GAMM,W0HL14,METAL-BINDING PROTEIN,SOPEG_0683,573017660,AHF73197.1,YBGI,WP_025244326.1
234267.Acid_3210	Acid_3210	Candidatus Solibacter	234267	aliases:ABJ84187,Q022B6_SOLUE,GI:116225478,Q022B6,SUS:ACID_3210,ABJ84187.1,ACID_3210,116225478
234267.Acid_3211	Acid_3211	Candidatus Solibacter	234267	aliases:Q022B5_SOLUE,GI:116225479,INTERPRO:IPR002678,SUS:ACID_3211,ABJ84188,ABJ84188.1,Q022B5,PROTEIN OF UNKNOWN FUNCTION DUF34,ACID_3211,116225479,IPR002678
1211844.CBLM010000085_gene3231	1211844.CBLM010000085_gene3231	Candidatus Stoquefichus	1211844	aliases:CBLM010000085_GENE3231
1249480.B649_02460	B649_02460	Candidatus Sulfuricurvum	1249480	aliases:K7SK65_9HELI,14762946,3.5.4.16,SULR:B649_02460,GENEID:14762946,476409675,YP_007527501,AFV96806,K7SK65,GI:476409675,B649_02460,YP_007527501.1,EC 3.5.4.16
412965.COSY_0852	COSY_0852	Candidatus Vesicomyosocius	412965	aliases:A5CVR4_VESOH,BAF61957.1,COSY_0852,VOK:COSY_0852,WP_011930226.1,A5CVR4,BAF61957,GI:146326814,146326814
9612.ENSCAFP00000017675	NIF3L1	Canis lupus	9612	aliases:XP_849215.1,XM_005640519.1,XM_844122,XP_005640580.1,XP_005640576.1,UPI000274A582,XP_005640577.1,CFA:607446,AAEX03018013,ENSCAFT00000019068,XM_005640521,XP_005640580,ENSCAFP00000017682,XM_005640520.1,MDS015,XM_005640521.1,ENSCAFP00000017684,XP_849215,NIF3 NGG1 INTERACTING FACTOR 3-LIKE 1 (S. CEREVISIAE),XM_005640519,XP_005640578,XP_005640579,XP_005640576,XP_005640577,CALS-7,XP_005640579.1,…
860228.Ccan_09530	Ccan_09530	Capnocytophaga canimorsus	860228	aliases:WP_013997061.1,GTP CYCLOHYDROLASE 1 TYPE 2 HOMOLOG,AEK23071,AEK23071.1,339901992,F9YUU6,CCM:CCAN_09530,UPF0135 PROTEIN YQFO,CCAN_09530,GI:339901992,F9YUU6_CAPCC
926551.KB900736_gene1244	926551.KB900736_gene1244	Capnocytophaga cynodegmi	926551	aliases:GTP CYCLOHYDROLASE 1 TYPE 2 HOMOLOG,CCYN2B_120173,A0A0B7H4S1,KB900736_GENE1244,A0A0B7H4S1_9FLAO,WP_041990410.1
553178.CAPGI0001_2148	EEK14338.1	Capnocytophaga gingivalis	553178	aliases:GTP CYCLOHYDROLASE 1 TYPE 2 HOMOLOG,C2M5S2,GI:228275561,C2M5S2_CAPGI,EEK14338,CGH:CGC50_01830,EEK14338.1,DINUCLEAR METAL CENTER PROTEIN, YBGI FAMILY,ATA86005,WP_002668191.1,CAPGI0001_2148,228275561
641143.HMPREF9331_00197	EPD31725.1	Capnocytophaga granulosa	641143	aliases:S2W049_9FLAO,GTP CYCLOHYDROLASE 1 TYPE 2 HOMOLOG,EPD31725.1,512031695,HMPREF9331_00197,EPD31725,GI:512031695,WP_016419321.1,YBGI/FAMILY DINUCLEAR METAL CENTER PROTEIN,S2W049
873517.HMPREF1977_0144	EFS98637.1	Capnocytophaga ochracea	873517	aliases:314946646,GTP CYCLOHYDROLASE 1 TYPE 2 HOMOLOG,WP_002671133.1,GI:314946646,EFS98637,E4MP34,DINUCLEAR METAL CENTER PROTEIN, YBGI FAMILY,E4MP34_CAPOC,EFS98637.1,HMPREF1977_0144
521097.Coch_1542	Coch_1542	Capnocytophaga ochracea	521097	aliases:29674921,GTP CYCLOHYDROLASE 1 TYPE 2 HOMOLOG,COC:COCH_1542,INTERPRO:IPR002678,PROTEIN OF UNKNOWN FUNCTION DUF34,ACU93087.1,COCH_1542,GI:256581952,C7M6W1_CAPOD,256581952,WP_015782638.1,ACU93087,C7M6W1,IPR002678
1035193.HMPREF9073_00412	EKY21715.1	Capnocytophaga sp.	1035193	aliases:L1Q1Z0_9FLAO,EKY21715.1,429180495,INTERPRO:IPR002678,L1Q1Z0,HMPREF9073_00412,DINUCLEAR METAL CENTER PROTEIN, YBGI FAMILY,GTP CYCLOHYDROLASE 1 TYPE 2 HOMOLOG,EKY21715,WP_009414208.1,GI:429180495,IPR002678
888059.HMPREF9071_1543	EGD33826.1	Capnocytophaga sp.	888059	aliases:GI:325691864,325691864,F0IG30_9FLAO,HMPREF9071_1543,F0IG30,WP_009745985.1,EGD33826.1,GTP CYCLOHYDROLASE 1 TYPE 2 HOMOLOG,EGD33826
1127692.HMPREF9075_02635	EKY05435.1	Capnocytophaga sp.	1127692	aliases:GTP CYCLOHYDROLASE 1 TYPE 2 HOMOLOG,WP_009414986.1,EKY05435,INTERPRO:IPR002678,HMPREF9075_02635,EKY05435.1,DINUCLEAR METAL CENTER PROTEIN, YBGI FAMILY,L1NQD3,GI:429163187,429163187,L1NQD3_9FLAO,IPR002678
706436.HMPREF9074_09201	KHE68306.1	Capnocytophaga sp.	706436	aliases:GTP CYCLOHYDROLASE 1 TYPE 2 HOMOLOG,IPR002678,HMPREF9074_09201,INTERPRO:IPR002678,KHE68306,DINUCLEAR METAL CENTER PROTEIN, YBGI FAMILY,WP_009391233.1,KHE68306.1,GI:725815339,725815339,A0A0A6XWQ8,A0A0A6XWQ8_9FLAO
1227266.HMPREF1551_02422	ERI61743.1	Capnocytophaga sp.	1227266	aliases:GTP CYCLOHYDROLASE 1 TYPE 2 HOMOLOG,542962683,GI:542962683,INTERPRO:IPR002678,U2AQV5,DINUCLEAR METAL CENTER PROTEIN, YBGI FAMILY,HMPREF1551_02422,ERI61743.1,IPR002678,WP_021629160.1,U2AQV5_9FLAO,ERI61743
553177.CAPSP0001_1359	EEB66091.1	Capnocytophaga sputigena	553177	aliases:EEB66091,213954771,CAPSP0001_1359,DINUCLEAR METAL CENTER PROTEIN, YBGI FAMILY,NIF3-LIKE DINUCLEAR METAL CENTER HEXAMERIC PROTEIN,CGC55_03565,GI:213954771,A0A250FHY6_CAPSP,A0A250FHY6,EEB66091.1
43229.XP_007722226.1	A1O1_03129	Capronia coronata	43229	aliases:GENEID:19158025,GI:628232458,W9YP66,19158025,628232458,XP_007722226,XP_007722226.1,XM_007724036.1,W9YP66_9EURO,A1O1_03129
43228.XP_007730291.1	A1O3_01958	Capronia epimyces	43228	aliases:628263603,XP_007730291.1,GENEID:19166091,GI:628263603,W9Z327_9EURO,XM_007732101.1,A1O3_01958,XP_007730291,W9Z327,19166091
192875.XP_004345457.1	192875.XP_004345457.1	Capsaspora owczarzaki	192875	aliases:A0A0D2WU71,A0A0D2WU71_CAPO3,CAOG_05867,GI:470296823,NIF3-LIKE PROTEIN 1,XP_004345457,XP_004345457.1,GENEID:14896676,XM_004345407.1,CAOG_005867,470296823,14896676
246194.CHY_1566	CHY_1566	Carboxydothermus hydrogenoformans	246194	aliases:ABB13928,Q3ABT9_CARHZ,CHY:CHY_1566,WP_011344470.1,77995029,CHY_1566,ABB13928.1,GI:77995029,Q3ABT9
246194.CHY_0460	CHY_0460	Carboxydothermus hydrogenoformans	246194	aliases:77995302,GI:77995302,ABB14201.1,WP_011343394.1,CHY:CHY_0460,GTP CYCLOHYDROLASE 1 TYPE 2 HOMOLOG,CONSERVED HYPOTHETICAL PROTEIN TIGR00486,Q3AEW6_CARHZ,CHY_0460,ABB14201,Q3AEW6
1231626.CAHE_0696	CAHE_0696	Cardinium endosymbiont	1231626	aliases:404433191,CCM10473,GTP CYCLOHYDROLASE 1 TYPE 2 HOMOLOG,WP_014934840.1,GI:404433191,CCM10473.1,K0P6L9,CHE:CAHE_0696,K0P6L9_9BACT,CAHE_0696
1354314.CHV_a0425	CHV_a0425	Cardinium endosymbiont	1354314	aliases:CDG49738,CHV_A0425,CDG49738.1,612065587,NGG1P INTERACTING FACTOR 3 RELATED PROTEIN,WP_034576821.1,GI:612065587,GTP CYCLOHYDROLASE 1 TYPE 2 HOMOLOG,X5J798,X5J798_9BACT
1336245.JAGO01000010_gene687	1336245.JAGO01000010_gene687	Carnimonas nigrificans	1336245	aliases:JAGO01000010_GENE687
1449335.JQLG01000004_gene2239	1449335.JQLG01000004_gene2239	Carnobacterium alterfunditum	1449335	aliases:GTP CYCLOHYDROLASE 1 TYPE 2 HOMOLOG,A0A1N6H223,JQLG01000004_GENE2239,A0A1N6H223_9LACT,WP_034548682.1,SAMN05878443_1573
1449336.JQLO01000001_gene975	1449336.JQLO01000001_gene975	Carnobacterium divergens	1449336	aliases:JQLO01000001_GENE975,IV74_GL001837,GTP CYCLOHYDROLASE 1 TYPE 2 HOMOLOG,A0A0R2HMW2,A0A0R2HMW2_CARDV
1449337.JQLL01000001_gene409	1449337.JQLL01000001_gene409	Carnobacterium funditum	1449337	aliases:JQLL01000001_GENE409
1449338.JQLU01000004_gene354	1449338.JQLU01000004_gene354	Carnobacterium gallinarum	1449338	aliases:JQLU01000004_GENE354
1234679.BN424_1747	BN424_1747	Carnobacterium maltaromaticum	1234679	aliases:GI:508080116,UNIPROTKB/TREMBL:K8EH52,BN424_1747,K8EH52,CML:BN424_1747,508080116,NIF3-RELATED PROTEIN,GTP CYCLOHYDROLASE 1 TYPE 2 HOMOLOG,CCO11188.2,WP_015076428.1,K8EH52_CARML,CCO11188,INTERPRO:IPR004474,IPR004474
1449342.JQMR01000001_gene465	1449342.JQMR01000001_gene465	Carnobacterium mobile	1449342	aliases:JQMR01000001_GENE465
1449343.JQLQ01000002_gene1306	1449343.JQLQ01000002_gene1306	Carnobacterium pleistocenium	1449343	aliases:JQLQ01000002_GENE1306
208596.CAR_c11720	yqfO	Carnobacterium sp.	208596	aliases:GI:328673818,AEB29864.1,GTP CYCLOHYDROLASE 1 TYPE 2 HOMOLOG,328673818,CRN:CAR_C11720,F4BR68,WP_013710806.1,YQFO,AEB29864,CAR_C11720,UPF0135 PROTEIN YQFO,F4BR68_CARS1
1266845.Q783_05360	Q783_05360	Carnobacterium sp.	1266845	aliases:GTP CYCLOHYDROLASE 1 TYPE 2 HOMOLOG,554509345,U5S9K3,AGY81711.1,CAW:Q783_05360,GI:554509345,DINUCLEAR METAL CENTER PROTEIN, YBGI FAMILY,WP_023177925.1,Q783_05360,U5S9K3_9LACT,AGY81711
1437824.BN940_01801	CDM22836.1	Castellaniella defragrans	1437824	aliases:589264900,CDM22836,GI:589264900,W8X1Q9,W8X1Q9_CASDE,UNIPROTKB/TREMBL:W8X1Q9,WP_043679496.1,BN940_01801,CDM22836.1,CDN:BN940_01801,GOA:W8X1Q9
1234409.C683_0216	C683_0216	Catellicoccus marimammalium	1234409	aliases:K8ZQA1,GTP CYCLOHYDROLASE 1 TYPE 2 HOMOLOG,C683_0216,422843313,K8ZQA1_9ENTE,EKU27751,WP_009488490.1,UPF0135 PROTEIN,EKU27751.1,GI:422843313
1121272.KB903272_gene237	1121272.KB903272_gene237	Catelliglobosispora koreensis	1121272	aliases:KB903272_GENE237
1328313.DS2_01515	DS2_01515	Catenovulum agarivorans	1328313	aliases:GI:584427663,W7QXA0,NIF3 PROTEIN,DS2_01515,WP_035012818.1,584427663,W7QXA0_9ALTE,EWH12358.1,EWH12358
479433.Caci_5891	Caci_5891	Catenulispora acidiphila	479433	aliases:CAI:CACI_5891,ACU74749.1,INTERPRO:IPR002678,256361252,GI:256361252,C7QEZ1,ACU74749,PROTEIN OF UNKNOWN FUNCTION DUF34,CACI_5891,C7QEZ1_CATAD,WP_015794478.1,IPR002678
33876.JNXY01000018_gene7811	33876.JNXY01000018_gene7811	Catenuloplanes japonicus	33876	aliases:JNXY01000018_GENE7811
10141.ENSCPOP00000007702	NIF3L1	Cavia porcellus	10141	aliases:XM_003463351,ENSCPOP00000007702,ENSCPOG00000008572,100719103,MDS015,NIF3-LIKE PROTEIN 1,XM_005000707.1,NIF3 NGG1 INTERACTING FACTOR 3-LIKE 1 (S. CEREVISIAE),H0VCN1_CAVPO,H0VCN1,ENSCPOT00000008649,XP_005000764.1,CALS-7,NIF3L1,XP_005000764,XP_013000694.1,XM_003463351.2,UPI000184C6F4,XM_005000707,XP_003463399.2,XP_003463399,NIF3L1-201,XP_013000693.1,ALS2CR1
158822.LH89_05905	AIR68767.1	Cedecea neteri	158822	aliases:690286149,AIR68767.1,METAL-BINDING PROTEIN,LH89_05905,GI:690286149,AIR68767
590998.Celf_2259	Celf_2259	Cellulomonas fimi	590998	aliases:F4H289,INTERPRO:IPR017221,CFI:CELF_2259,INTERPRO:IPR002678,F4H289_CELFA,GI:332339803,WP_013771412.1,AEE46386.1,GTP CYCLOHYDROLASE 1 TYPE 2 HOMOLOG,IPR017221,PROTEIN OF UNKNOWN FUNCTION DUF34,AEE46386,332339803,CELF_2259,IPR002678
446466.Cfla_0315	Cfla_0315	Cellulomonas flavigena	446466	aliases:CFL:CFLA_0315,ADG73233,ADG73233.1,WP_013115567.1,INTERPRO:IPR002678,PROTEIN OF UNKNOWN FUNCTION DUF34,GI:296019997,296019997,D5UH30_CELFN,CFLA_0315,D5UH30,IPR002678
446466.Cfla_2143	Cfla_2143	Cellulomonas flavigena	446466	aliases:D5UG14,GI:296021801,GTP CYCLOHYDROLASE 1 TYPE 2 HOMOLOG,INTERPRO:IPR017221,296021801,ADG75037.1,D5UG14_CELFN,ADG75037,INTERPRO:IPR011322,IPR011322,CFLA_2143,INTERPRO:IPR002678,WP_013117371.1,CFL:CFLA_2143,PROTEIN OF UNKNOWN FUNCTION DUF34,IPR017221,IPR002678
1095767.CAHD01000193_gene175	1095767.CAHD01000193_gene175	Cellulomonas massiliensis	1095767	aliases:CAHD01000193_GENE175
1380354.JIAN01000006_gene778	1380354.JIAN01000006_gene778	Cellulomonas sp.	1380354	aliases:JIAN01000006_GENE778
1304865.JAGF01000001_gene2951	1304865.JAGF01000001_gene2951	Cellulomonas sp.	1304865	aliases:JAGF01000001_GENE2951
1454010.JEOE01000002_gene488	1454010.JEOE01000002_gene488	Cellulomonas sp.	1454010	aliases:JEOE01000002_GENE488
688270.Celal_2301	Celal_2301	Cellulophaga algicola	688270	aliases:ADV49593.1,GTP CYCLOHYDROLASE 1 TYPE 2 HOMOLOG,CELAL_2301,E6X6Q5,E6X6Q5_CELAD,NGG1P INTERACTING FACTOR 3 PROTEIN, NIF3,ADV49593,WP_013551067.1,GI:319422484,319422484,CAO:CELAL_2301
1348583.ATLH01000028_gene121	1348583.ATLH01000028_gene121	Cellulophaga baltica	1348583	aliases:GTP CYCLOHYDROLASE 1 TYPE 2 HOMOLOG,WP_074539222.1,ATLH01000028_GENE121,A0A1G7KKJ0,SAMN04487992_11322,A0A1G7KKJ0_9FLAO
867900.Celly_0592	Celly_0592	Cellulophaga lytica	867900	aliases:WP_013620175.1,F0RAN4_CELLC,GTP CYCLOHYDROLASE 1 TYPE 2 HOMOLOG,CLY:CELLY_0592,324320962,ADY28427,ADY28427.1,GI:324320962,NGG1P INTERACTING FACTOR 3 PROTEIN, NIF3,F0RAN4,CELLY_0592
935839.JAGJ01000017_gene165	935839.JAGJ01000017_gene165	Cellulosimicrobium cellulans	935839	aliases:JAGJ01000017_GENE165
888060.HMPREF9081_0716	EGK61131.1	Centipeda periodontii	888060	aliases:GI:333389976,32174463,WP_006305591.1,HMPREF9081_0716,EGK61131,F5RKD1,333389976,EGK61131.1,F5RKD1_9FIRM
7213.XP_004529688.1	7213.XP_004529688.1	Ceratitis capitata	7213	aliases:XP_004529688,101460562,XP_004529688.1,NIF3-LIKE PROTEIN 1-LIKE ISOFORM X1,GI:498981754,LOC101460562,498981754,XM_004529631.1,GENEID:101460562
1279009.ADICEAN_01912	EMR02939.1	Cesiribacter andamanensis	1279009	aliases:GI:470229080,EMR02939.1,GTP CYCLOHYDROLASE 1 TYPE 2 HOMOLOG,M7NWV3,ADICEAN_01912,470229080,EMR02939,WP_009195308.1,M7NWV3_9BACT
1319815.HMPREF0202_00383	ERT69692.1	Cetobacterium somerae	1319815	aliases:GI:551698791,U7VDC9,INTERPRO:IPR002678,551698791,HMPREF0202_00383,DINUCLEAR METAL CENTER PROTEIN, YBGI FAMILY,U7VDC9_9FUSO,ERT69692.1,IPR002678,WP_023049932.1,ERT69692
209285.XP_006692196.1	209285.XP_006692196.1	Chaetomium thermophilum	209285	aliases:18255732,G0S2E4_CHATD,GENEID:18255732,CTHT_0016940,CTHR:CTHT_0016940,PUTATIVE NGG1 INTERACTING FACTOR,G0S2E4,XP_006692196,XP_006692196.1,GI:576036646,576036646,XM_006692133.1
8469.XP_007071922.1	NIF3L1	Chelonia mydas	8469	aliases:591355233,XP_007071922.1,GENEID:102932178,M7B7X3,NGG1 INTERACTING FACTOR 3 LIKE 1,NIF3-LIKE PROTEIN 1,PUTATIVE GTP CYCLOHYDROLASE 1 TYPE 2 NIF3L1,XP_007071922,M7B7X3_CHEMY,XM_007071860.1,NIF3L1,CMY:102932178,UY3_18578,102932178,GI:591355233
34839.XP_005373288.1	Nif3l1	Chinchilla lanigera	34839	aliases:533115285,533115287,GENEID:102029137,102029137,252359,XM_005373231.1,CDD:252359,NIF3-LIKE PROTEIN 1,GI:533115285,XP_005373288.1,NIF3L1,34839,GI:533115287,GENEID:102028599,TAXON:34839,XP_005373288,102028599
1313304.CALK_1489	CALK_1489	Chitinivibrio alkaliphilus	1313304	aliases:U7DB37,GI:550266262,550266262,ERP31625.1,WP_022636944.1,ERP31625,CALK_1489,U7DB37_9BACT
485918.Cpin_6896	Cpin_6896	Chitinophaga pinensis	485918	aliases:CPI:CPIN_6896,GTP CYCLOHYDROLASE 1 TYPE 2 HOMOLOG,GI:256040753,ACU64297.1,CPIN_6896,256040753,PROTEIN OF UNKNOWN FUNCTION DUF34,INTERPRO:IPR002678,WP_012794460.1,ACU64297,C7PQ59_CHIPD,C7PQ59,IPR002678
485918.Cpin_6084	Cpin_6084	Chitinophaga pinensis	485918	aliases:IPR006311,C7PFT1,CPIN_6084,GI:256039949,WP_012793658.1,INTERPRO:IPR002678,ACU63493,256039949,C7PFT1_CHIPD,INTERPRO:IPR006311,PROTEIN OF UNKNOWN FUNCTION DUF34,CPI:CPIN_6084,ACU63493.1,IPR002678
1229831.M832_04150	M832_04150	Chlamydia avium	1229831	aliases:CAV:M832_04150,PUTATIVE GTP CYCLOHYDROLASE 1 TYPE 2,TIGR00486,PF01784,INTERPRO:PF01784,GI:589299147,INTERPRO:3.40.1390.30,3.40.1390.30,INTERPRO:G3DSA,INTERPRO:TIGR00486,INTERPRO:SSF102705,SSF102705,589299147,W8JGH8_9CHLA,M832_04150,W8JGH8,G3DSA,AHK63280,AHK63280.1
1143323.M787_0372	M787_0372	Chlamydia gallinacea	1143323	aliases:545672019,A0A173DXU5,M787_0372,NIF3 FAMILY PROTEIN,NIF3-LIKE DINUCLEAR METAL CENTER HEXAMERIC PROTEIN,ANG65727,GI:545672019,M787_000065,WP_021828432.1,A0A173DXU5_9CHLA,CGZ:M787_000065,ERL53407,ERL53407.1
243161.TC_0384	TC_0384	Chlamydia muridarum	243161	aliases:1245736,AIT91464,7190424,GI:7190424,Q9PKS8,WP_010230301.1,TC_0384,CMG:NC81_01905,GTP CYCLOHYDROLASE 1 TYPE 2 HOMOLOG,AAF39241.1,GCH1L_CHLMU,AAF39241
1238237.CP10139811_0242	EPP34305.1	Chlamydia psittaci	1238237	aliases:519789482,S7KIT5_CHLPS,NIF3 FAMILY PROTEIN,S7KIT5,EPP34305,EPP34305.1,GI:519789482,CP10139811_0242,WP_020370239.1
331636.G5O_0674	G5O_0674	Chlamydia psittaci	331636	aliases:12243094,A9969_00070,A0A1D3CP09,CHB:G5O_0674,GI:328914819,AEB55652,NIF3-LIKE DINUCLEAR METAL CENTER HEXAMERIC PROTEIN,G5O_0674,328914819,WP_006343308.1,CONSERVED HYPOTHETICAL PROTEIN TIGR00486,A0A1D3CP09_CHLPS,AEB55652.1
1444711.CCJF01000005_gene1117	1444711.CCJF01000005_gene1117	Chlamydia sp.	1444711	aliases:CCJF01000005_GENE1117
1444712.BN1013_01472	CDZ80944.1	Chlamydia sp.	1444712	aliases:A0A078LA02,BN1013_01472,CDZ80944,METAL-BINDING PROTEIN,A0A078LA02_9CHLA,CDZ80944.1,GI:685075118,685075118
1405296.Q499_0117	ybgI	Chlamydia suis	1405296	aliases:Q499_0117,CS829B_1110,A0A1T4IZW7,A0A1T4IZW7_9CHLA,ESN89668.1,METAL-BINDING PREDICTED HYDROLASE-OXIDASE,ESN89668,YBGI,555686432,GI:555686432
813.O172_00585	813.O172_00585	Chlamydia trachomatis	813	aliases:O172_00585,A0A0E9FX17,ERS095037_00401,ERS133248_00358,WP_009873563.1,ERS133252_00387,NIF3-LIKE PROTEIN,AEP34922,A0A0E9FX17_CHLTH,ERS133250_00084,ERS066953_00632,ERS133246_04000,ERS095036_00406,CRA:CTO_0115
218497.CAB612	CAB612	Chlamydophila abortus	218497	aliases:Q5L5N3_CHLAB,UNIPROTKB/TREMBL:Q5L5N3,IPR002678,CAH64058,WP_011097202.1,CAB612,GI:62148291,INTERPRO:IPR002678,Q5L5N3,62148291,CAH64058.1,CAB:CAB612
227941.CCA_00640	CCA_00640	Chlamydophila caviae	227941	aliases:AAP05382.1,CCA_00640,Q822N9_CHLCV,CCA:CCA_00640,WP_011006597.1,Q822N9,CONSERVED HYPOTHETICAL PROTEIN TIGR00486,GI:29834747,AAP05382,29834747
264203	CF0368	Chlamydophila felis	264202	aliases:Q254Z8_CHLFF,89331547,BAE81140,WP_011457920.1,CF0368,CFE:BAE81140.1,Q254Z8
331635.G5S_1013	G5S_1013	Chlamydophila pecorum	331635	aliases:GI:328807758,AEB41931,328807758,CONSERVED HYPOTHETICAL PROTEIN TIGR00486,CPM:G5S_1013,AEB41931.1,G5S_1013
115711.CP_0635	CP_0635	Chlamydophila pneumoniae	115711	aliases:7189549,GTP CYCLOHYDROLASE 1 TYPE 2 HOMOLOG,GCH1L_CHLPN,CPJ0137,AAF38450,Q9Z946,NP_224345.1,WP_010882787.1,GI:7189549,AAF38450.1,CPA:CP_0635,CPB0138,894813,CP_0635,CPN_0137
115713.CPn_0137	ybgI	Chlamydophila pneumoniae	115713	aliases:CPN:CPN0137,GTP CYCLOHYDROLASE 1 TYPE 2 HOMOLOG,GCH1L_CHLPN,Q9Z946,ACR FAMILY,NP_224345.1,WP_010882787.1,NP_224345,CPJ0137,AAD18290.1,CPB0138,894813,YBGI,4376402,AAD18290,CP_0635,GI:4376402,CPN_0137
182082.CpB0138	ybgI	Chlamydophila pneumoniae	182082	aliases:NP_224345.1,GTP CYCLOHYDROLASE 1 TYPE 2 HOMOLOG,GCH1L_CHLPN,Q9Z946,WP_010882787.1,CPT:CPB0138,33235981,CPJ0137,GI:33235981,CPB0138,894813,YBGI,AAP98071,CP_0635,AAP98071.1,CPN_0137
60711.ENSCSAP00000007061	NIF3L1	Chlorocebus sabaeus	60711	aliases:XM_007965802.1,XP_007963994.1,XP_007963995.1,ENSCSAG00000010842,ENSCSAT00000008931,XP_007963996.1,XP_007963993.1,CSAB:103217624,A0A0D9REM2,XP_007963998,XP_007963999,MDS015,XP_007963993,XP_007963994,XP_007963995,XP_007963996,NIF3 NGG1 INTERACTING FACTOR 3-LIKE 1 (S. CEREVISIAE),XP_007964001,XP_007964000,103217624,A0A0D9REM2_CHLSB,NIF3-LIKE PROTEIN 1,XM_007965804,NIF3L1,XM_007965802,CALS-7,…
211165.AJLN01000154_gene734	211165.AJLN01000154_gene734	Chlorogloeopsis fritschii	211165	aliases:AJLN01000154_GENE734
211165.AJLN01000145_gene1334	211165.AJLN01000145_gene1334	Chlorogloeopsis fritschii	211165	aliases:AJLN01000145_GENE1334
1192034.CAP_1893	CAP_1893	Chondromyces apiculatus	1192034	aliases:EYF06363,A0A017TAQ2_9DELT,GTP CYCLOHYDROLASE 1 TYPE 2 HOMOLOG,WP_044239937.1,A0A017TAQ2,CAP_1893,EYF06363.1,599568357,GI:599568357
243365.CV_4009	CV_4009	Chromobacterium violaceum	243365	aliases:34105316,GI:34105316,Q7NQX6,AAQ61671,AAQ61671.1,Q7NQX6_CHRVO,24948301,WP_011137556.1,CV_4009,CVI:CV_4009
290398.Csal_2210	Csal_2210	Chromohalobacter salexigens	290398	aliases:Q1QVE7,ABE59561.1,INTERPRO:IPR002678,CSAL_2210,CSA:CSAL_2210,WP_011507507.1,ABE59561,PROTEIN OF UNKNOWN FUNCTION DUF34,Q1QVE7_CHRSD,IPR002678,GI:91797422,91797422
251229.Chro_3179	Chro_3179	Chroococcidiopsis thermalis	251229	aliases:428010081,AFY88644,AFY88644.1,K9U329_9CYAN,INTERPRO:IPR002678,CTHE:CHRO_3179,K9U329,GI:428010081,CHRO_3179,PROTEIN OF UNKNOWN FUNCTION DUF34,WP_015155190.1,IPR002678
251229.Chro_5581	Chro_5581	Chroococcidiopsis thermalis	251229	aliases:K9U8J0,AFY90938,CTHE:CHRO_5581,INTERPRO:IPR002678,428012375,CHRO_5581,AFY90938.1,K9U8J0_9CYAN,PROTEIN OF UNKNOWN FUNCTION DUF34,GI:428012375,WP_015157475.1,IPR002678
8479.XP_008165099.1	NIF3L1	Chrysemys picta	8479	aliases:XP_005310374,641758093,NGG1 INTERACTING FACTOR 3 LIKE 1,PUTATIVE GTP CYCLOHYDROLASE 1 TYPE 2 NIF3L1 ISOFORM X1,XP_008165099,XP_008165099.1,NIF3L1,CPIC:101948453,GI:641758093,GENEID:101948453,101948453,XM_008166878.1
266748.HY04_13985	HY04_13985	Chryseobacterium antarcticum	266748	aliases:GTP CYCLOHYDROLASE 1 TYPE 2 HOMOLOG,A0A083WT70_9FLAO,KEY19499,A0A083WT70,KEY19499.1,WP_034720667.1,NGG1P INTERACTING FACTOR 3 PROTEIN, NIF3,665766729,GI:665766729,HY04_13985
1121285.AUFK01000009_gene960	1121285.AUFK01000009_gene960	Chryseobacterium caeni	1121285	aliases:AUFK01000009_GENE960
1121286.AUMT01000001_gene173	1121286.AUMT01000001_gene173	Chryseobacterium daeguense	1121286	aliases:AUMT01000001_GENE173
236814.IX39_17575	IX39_17575	Chryseobacterium formosense	236814	aliases:KFE98199,GI:671213005,A0A085Z186,KFE98199.1,NGG1P INTERACTING FACTOR 3 PROTEIN, NIF3,GTP CYCLOHYDROLASE 1 TYPE 2 HOMOLOG,671213005,WP_034678881.1,A0A085Z186_9FLAO,IX39_17575
525257.HMPREF0204_14640	EFK35571.1	Chryseobacterium gleum	525257	aliases:EFK35571.1,D7W788,300504431,GI:300504431,DINUCLEAR METAL CENTER PROTEIN, YBGI FAMILY,GTP CYCLOHYDROLASE 1 TYPE 2 HOMOLOG,WP_002980720.1,HMPREF0204_14640,D7W788_9FLAO,EFK35571
1121287.AUMU01000003_gene2922	1121287.AUMU01000003_gene2922	Chryseobacterium gregarium	1121287	aliases:AUMU01000003_GENE2922
491205.JARQ01000002_gene410	491205.JARQ01000002_gene410	Chryseobacterium hispalense	491205	aliases:JARQ01000002_GENE410
1218103.CIN01S_02_02570	GAE63132.1	Chryseobacterium indologenes	1218103	aliases:GI:573454419,GTP CYCLOHYDROLASE 1 TYPE 2 HOMOLOG,GAE63132.1,32135946,WP_034733857.1,ASE60316,W4T3K9_9FLAO,W4T3K9,CIO:CEQ15_01705,GAE63132,CIN01S_02_02570,573454419
421531.IX38_11645	IX38_11645	Chryseobacterium luteum	421531	aliases:GI:671218469,KFF03613.1,671218469,IX38_11645,KFF03613,A0A085ZGP9_9FLAO,NGG1P INTERACTING FACTOR 3 PROTEIN, NIF3,WP_034704885.1,GTP CYCLOHYDROLASE 1 TYPE 2 HOMOLOG,A0A085ZGP9
1300143.CCAV010000003_gene2052	1300143.CCAV010000003_gene2052	Chryseobacterium oranimense	1300143	aliases:GTP CYCLOHYDROLASE 1 TYPE 2 HOMOLOG,WP_073063961.1,SAMN05421866_2822,CCAV010000003_GENE2052,A0A1M5T3F4_9FLAO,A0A1M5T3F4
1121288.AULL01000019_gene1496	1121288.AULL01000019_gene1496	Chryseobacterium palustre	1121288	aliases:AULL01000019_GENE1496
558152.IQ37_12270	IQ37_12270	Chryseobacterium piperi	558152	aliases:A0A086B9I4_9FLAO,ASW74234,GTP CYCLOHYDROLASE 1 TYPE 2 HOMOLOG,NGG1P INTERACTING FACTOR 3 PROTEIN, NIF3,CPIP:CJF12_07970,KFF25598.1,A0A086B9I4,WP_034685450.1,GI:671240664,671240664,KFF25598,IQ37_12270
445961.IW15_10515	IW15_10515	Chryseobacterium soli	445961	aliases:GTP CYCLOHYDROLASE 1 TYPE 2 HOMOLOG,671228117,A0A086A913,NGG1P INTERACTING FACTOR 3 PROTEIN, NIF3,WP_034711028.1,GI:671228117,IW15_10515,A0A086A913_9FLAO,KFF13177.1,KFF13177
1233950.IW22_11560	IW22_11560	Chryseobacterium sp.	1233950	aliases:GI:671235973,671235973,GTP CYCLOHYDROLASE 1 TYPE 2 HOMOLOG,KFF20940,WP_034726473.1,A0A086AW76,NGG1P INTERACTING FACTOR 3 PROTEIN, NIF3,IW22_11560,KFF20940.1,A0A086AW76_9FLAO
1500281.JQKZ01000050_gene4144	1500281.JQKZ01000050_gene4144	Chryseobacterium sp.	1500281	aliases:JQKZ01000050_GENE4144
307480.IW16_09965	IW16_09965	Chryseobacterium vrystaatense	307480	aliases:NGG1P INTERACTING FACTOR 3 PROTEIN, NIF3,GI:671241263,KFF26193,KFF26193.1,671241263,IW16_09965
118005.AWNK01000009_gene207	118005.AWNK01000009_gene207	Chrysiogenes arsenatis	118005	aliases:AWNK01000009_GENE207
185453.XP_006862053.1	NIF3L1	Chrysochloris asiatica	185453	aliases:XM_006861991.1,XP_006862053.1,XP_006862053,GI:586462830,586462830,102810586,NIF3L1,PUTATIVE GTP CYCLOHYDROLASE 1 TYPE 2 NIF3L1,GENEID:102810586
185453.XP_006872220.1	185453.XP_006872220.1	Chrysochloris asiatica	185453	aliases:GI:586483428,LOW QUALITY PROTEIN: PUTATIVE GTP CYCLOHYDROLASE 1 TYPE 2 NIF3L1-LIKE,XM_006872158.1,GENEID:102833575,586483428,XP_006872220,XP_006872220.1,102833575,LOC102833575
497964.CfE428DRAFT_0749	EDY21504.1	Chthoniobacter flavus	497964	aliases:EDY21504,EDY21504.1,INTERPRO:IPR002678,B4CVR2,CFE428DRAFT_0749,IPR002678,PROTEIN OF UNKNOWN FUNCTION DUF34,196227000,WP_006978076.1,B4CVR2_9BACT,GI:196227000
1303518.CCALI_01911	CCW35719.1	Chthonomonas calidirosea	1303518	aliases:S0EWC2_CHTCT,510023663,CCW35719,UNCHARACTERIZED PROTEIN CONSERVED IN BACTERIA,CCZ:CCALI_01911,GTP CYCLOHYDROLASE 1 TYPE 2 HOMOLOG,GI:510023663,S0EWC2,CCW35719.1,CCALI_01911
7719.XP_004225511.1	7719.XP_004225511.1	Ciona intestinalis	7719	aliases:XM_004225463.2,GENEID:100186638,CIN:100186638,100186638,A0A1W2WJH7,A0A1W2WJH7_CIOIN,PUTATIVE GTP CYCLOHYDROLASE 1 TYPE 2 NIF3L1,LOC100186638,459172322,NIF3-LIKE PROTEIN 1,GI:459172322,XP_004225511.1,XP_004225511
1045009.AFXQ01000040_gene1900	1045009.AFXQ01000040_gene1900	Citricoccus sp.	1045009	aliases:AFXQ01000040_GENE1900
35703.DQ02_11685	DQ02_11685	Citrobacter amalonaticus	35703	aliases:AMG55045,KEY47761,CAF:AL524_19175,DQ02_11685,AL012_10925,KEY47761.1,666377963,A0A083Z3Y2,METAL-BINDING PROTEIN,31659665,WP_043001380.1,GI:666377963,A0A083Z3Y2_CITAM
1114922.CIFAM_08_00490	ybgI	Citrobacter farmeri	1114922	aliases:AST79001,693468065,A0A223JP54,WP_042320655.1,GAL49392,NIF3-LIKE DINUCLEAR METAL CENTER HEXAMERIC PROTEIN,CIFAM_08_00490,A0A223JP54_9ENTR,GI:693468065,YBGI,GAL49392.1,HYPOTHETICAL PROTEIN YBGI,CFAR:CI104_07830,CI104_07830
637910.ROD_07101	ROD_07101	Citrobacter rodentium	637910	aliases:UNIPROTKB/TREMBL:D2TNL5,CBG87485,ROD_07101,INTERPRO:IPR002678,CBG87485.1,CRO:ROD_07101,D2TNL5_CITRI,GI:282947923,D2TNL5,282947923,WP_012905039.1,IPR002678
1218086.BBNB01000002_gene2712	1218086.BBNB01000002_gene2712	Citrobacter sedlakii	1218086	aliases:BBNB01000002_GENE2712
469595.CSAG_00485	CSAG_00485	Citrobacter sp.	469595	aliases:CSAG_00485,UPF0135 PROTEIN YBGI,534476418,EEH92131,GI:534476418,EEH92131.2
1080067.BAZH01000008_gene108	1080067.BAZH01000008_gene108	Citrobacter sp.	1080067	aliases:BAZH01000008_GENE108
500640.CIT292_08126	EFE08256.1	Citrobacter youngae	500640	aliases:EFE08256,D4BCC0_9ENTR,EFE08256.1,INTERPRO:IPR002678,D4BCC0,CIT292_08126,DINUCLEAR METAL CENTER PROTEIN, YBGI FAMILY,291070147,GI:291070147,IPR002678
86049.XP_008726902.1	CLCR_10270	Cladophialophora carrionii	86049	aliases:XM_008728680.1,GENEID:19982829,G647_04336,19982829,GI:671172872,671172872,XP_008726902,A0A1C1CX06_9EURO,XP_008726902.1,YBGI/FAMILY DINUCLEAR METAL CENTER PROTEIN,CLCR_10270,A0A1C1CX06
1182553.XP_007742256.1	A1O5_03455	Cladophialophora psammophila	1182553	aliases:628319717,XP_007742256,19188183,GENEID:19188183,XM_007744066.1,A1O5_03455,XP_007742256.1,W9X0F7_9EURO,GI:628319717,W9X0F7
470704.XP_007756560.1	A1O7_04359	Cladophialophora yegresii	470704	aliases:XP_007756560.1,A1O7_04359,GENEID:19178945,GI:628290344,19178945,XP_007756560,W9VWJ5_9EURO,W9VWJ5,XM_007758370.1,628290344
443906.CMM_1629	CMM_1629	Clavibacter michiganensis	443906	aliases:CAN01681.1,A5CRH2_CLAM3,A5CRH2,WP_012038317.1,INTERPRO:IPR002678,CAN01681,GI:147830741,UNIPROTKB/TREMBL:A5CRH2,147830741,IPR002678,CMM_1629,CMI:CMM_1629
31964.CMS1612	CMS1612	Clavibacter michiganensis	31964	aliases:CMS1612,169156571,B0RBZ4_CLAMS,CMS:CMS1612,UNIPROTKB/TREMBL:B0RBZ4,INTERPRO:IPR002678,CAQ01722.1,GI:169156571,CAQ01722,B0RBZ4,29469921,WP_012298978.1,IPR002678
5111.M1VW17	CPUR_04340	Claviceps purpurea	5111	aliases:M1VW17,CPUR_04340,RELATED TO NGG1P-INTERACTING FACTOR 3,M1VW17_CLAP2,PUTATIVE GTP CYCLOHYDROLASE 1 TYPE 2 OS=CLAVICEPS PURPUREA (STRAIN 20.1) GN=CPUR_04340 PE=3 SV=1
1304284.L21TH_0412	L21TH_0412	Clostridiaceae bacterium	1304284	aliases:EOD01491,R1CS76_9CLOT,GTP CYCLOHYDROLASE 1 TYPE 2 HOMOLOG,EOD01491.1,485596932,GI:485596932,WP_006307867.1,L21TH_0412,R1CS76
457421.CBFG_00952	CBFG_00952	Clostridiales bacterium	457421	aliases:GI:239517376,C5EGA7_9FIRM,C5EGA7,NIF3 (NGG1P INTERACTING FACTOR 3),EEQ57242,EEQ57242.1,WP_008717593.1,CBFG_00952,239517376
457421.CBFG_00442	CBFG_00442	Clostridiales bacterium	457421	aliases:EEQ56732,DINUCLEAR METAL CENTER PROTEIN, YBGI FAMILY,239516866,C5EJF7_9FIRM,WP_008716716.1,C5EJF7,EEQ56732.1,GI:239516866,CBFG_00442
938289.CAJN020000001_gene1264	938289.CAJN020000001_gene1264	Clostridiales bacterium	938289	aliases:CAJN020000001_GENE1264
1321778.HMPREF1982_02516	ERI92259.1	Clostridiales bacterium	1321778	aliases:ERI92259.1,GI:542997050,U2CP36,ERI92259,INTERPRO:IPR002678,PUTATIVE NIF3 FAMILY PROTEIN,542997050,U2CP36_9FIRM,WP_021655593.1,HMPREF1982_02516,IPR002678
1321778.HMPREF1982_03977	ERI90224.1	Clostridiales bacterium	1321778	aliases:ERI90224.1,WP_021657223.1,HMPREF1982_03977,INTERPRO:IPR002678,542994902,DINUCLEAR METAL CENTER PROTEIN, YBGI FAMILY,ERI90224,U2CIB3_9FIRM,U2CIB3,GI:542994902,IPR002678
1321778.HMPREF1982_01456	ERI93693.1	Clostridiales bacterium	1321778	aliases:ERI93693,INTERPRO:IPR002678,HMPREF1982_01456,542998590,ERI93693.1,DINUCLEAR METAL CENTER PROTEIN, YBGI FAMILY,WP_021654456.1,U2DBK1,GI:542998590,U2DBK1_9FIRM,IPR002678
1232443.BAIA02000057_gene1338	1232443.BAIA02000057_gene1338	Clostridiales bacterium	1232443	aliases:BAIA02000057_GENE1338
1232446.BAIE02000011_gene1807	1232446.BAIE02000011_gene1807	Clostridiales bacterium	1232446	aliases:BAIE02000011_GENE1807
1232447.BAHW02000028_gene2219	1232447.BAHW02000028_gene2219	Clostridiales bacterium	1232447	aliases:BAHW02000028_GENE2219
1232447.BAHW02000025_gene1641	1232447.BAHW02000025_gene1641	Clostridiales bacterium	1232447	aliases:BAHW02000025_GENE1641
1232452.BAIB02000006_gene1514	1232452.BAIB02000006_gene1514	Clostridiales bacterium	1232452	aliases:BAIB02000006_GENE1514
938278.CAJO01000099_gene1692	938278.CAJO01000099_gene1692	Clostridiales bacterium	938278	aliases:CAJO01000099_GENE1692
938288.HG326227_gene532	938288.HG326227_gene532	Clostridiales bacterium	938288	aliases:HG326227_GENE532
877414.ATWA01000002_gene1140	877414.ATWA01000002_gene1140	Clostridiales bacterium	877414	aliases:ATWA01000002_GENE1140
1284708.HMPREF1634_02465	KGF07792.1	Clostridiales bacterium	1284708	aliases:KGF07792,HMPREF1634_02465,A0A095YMV7,690759305,GI:690759305,KGF07792.1,A0A095YMV7_9FIRM
1232453.BAIF02000110_gene721	1232453.BAIF02000110_gene721	Clostridiales bacterium	1232453	aliases:BAIF02000110_GENE721
1449126.JQKL01000017_gene2769	1449126.JQKL01000017_gene2769	Clostridiales bacterium	1449126	aliases:JQKL01000017_GENE2769
1449126.JQKL01000011_gene3586	1449126.JQKL01000011_gene3586	Clostridiales bacterium	1449126	aliases:JQKL01000011_GENE3586
1449126.JQKL01000021_gene96	1449126.JQKL01000021_gene96	Clostridiales bacterium	1449126	aliases:JQKL01000021_GENE96
1449126.JQKL01000005_gene948	1449126.JQKL01000005_gene948	Clostridiales bacterium	1449126	aliases:JQKL01000005_GENE948
699246.HMPREF0868_0870	ADC91078.1	Clostridiales genomosp.	699246	aliases:ADC91078.1,ADC91078,D3R1X8_MAGIU,CLO:HMPREF0868_0870,DINUCLEAR METAL CENTER PROTEIN, YBGI FAMILY,GI:289184653,D3R1X8,289184653,WP_012993430.1,HMPREF0868_0870
1121289.JHVL01000002_gene2323	1121289.JHVL01000002_gene2323	Clostridiisalibacter paucivorans	1121289	aliases:JHVL01000002_GENE2323
272562.CA_C1303	CA_C1303	Clostridium acetobutylicum	272562	aliases:UNCHARACTERIZED PROTEIN OF YBGI/ACR FAMILY,AAK79274.1,GTP CYCLOHYDROLASE 1 TYPE 2 HOMOLOG,CAC:CA_C1303,GI:15024233,1117487,WP_010964615.1,NP_347934,CA_C1303,Q97JI0,AAK79274,NP_347934.1,15024233,GCH1L_CLOAB
37659.JNLN01000001_gene1031	37659.JNLN01000001_gene1031	Clostridium algidicarnis	37659	aliases:JNLN01000001_GENE1031
37659.JNLN01000001_gene2658	37659.JNLN01000001_gene2658	Clostridium algidicarnis	37659	aliases:JNLN01000001_GENE2658
545243.BAEV01000035_gene1680	545243.BAEV01000035_gene1680	Clostridium arbusti	545243	aliases:BAEV01000035_GENE1680
1415775.U729_23	U729_23	Clostridium baratii	1415775	aliases:728873378,A0A0A7FWL7,AIY84039,NIF3 FAMILY PROTEIN,A0A0A7FWL7_9CLOT,GI:728873378,U729_23,CBV:U729_23,AIY84039.1
290402.Cbei_0855	Cbei_0855	Clostridium beijerinckii	290402	aliases:GI:149902206,WP_011968198.1,A6LRQ9_CLOB8,ABR33039,CBEI_0855,A6LRQ9,149902206,PROTEIN OF UNKNOWN FUNCTION DUF34,INTERPRO:IPR002678,ABR33039.1,CBE:CBEI_0855,IPR002678
1443125.Z962_05200	Z962_05200	Clostridium botulinum	1443125	aliases:Z962_05200,WP_039283830.1,KEH97020,A0A072XC11_CLOBO,GI:658084129,658084129,A0A072XC11,KEH97020.1
592027.CLG_B0661	CLG_B0661	Clostridium botulinum	592027	aliases:GI:253561121,EES90573.1,C5VRR9,253561121,EES90573,CLG_B0661,PATHEMA:CLG_B0661,C5VRR9_CLOBO
445335.CBN_2918	NPD5_2999	Clostridium botulinum	445335	aliases:A0A1L3NJ35,CBN_2918,EDT81801.1,182669825,NIF3 FAMILY PROTEIN,WP_072586381.1,CONSERVED HYPOTHETICAL PROTEIN TIGR00486,GI:182669825,A0A1L3NJ35_CLOBO,EDT81801,NPD5_2999
536232.CLM_3329	CLM_3329	Clostridium botulinum	536232	aliases:C1FVR6,CONSERVED HYPOTHETICAL PROTEIN TIGR00486,ACO85659.1,C1FVR6_CLOBJ,GI:226842993,WP_012704881.1,ACO85659,CLM_3329,CBY:CLM_3329,226842993
536233.CLO_2881	CLO_2881	Clostridium botulinum	536233	aliases:EES51228.1,EES51228,WP_003374591.1,CLO_2881,243085338,C5UZF8_CLOBO,C5UZF8,GI:243085338,PATHEMA:CLO_2881
929506.CbC4_1810	CbC4_1810	Clostridium botulinum	929506	aliases:GI:329126539,CBN:CBC4_1810,329126539,CBC4_1810,AEB76484,AEB76484.1,CONSERVED HYPOTHETICAL PROTEIN TIGR00486
1415774.U728_3389	U728_3389	Clostridium botulinum	1415774	aliases:NIF3 FAMILY PROTEIN,U728_3389,728868458,GI:728868458,AIY79121,AIY79121.1
632245.CLP_3364	CLP_3364	Clostridium butyricum	632245	aliases:CBUT:ATN24_05360,EEP55530,EEP55530.1,C4IDD4,GI:237657975,237657975,PATHEMA:CLP_3364,ALP89582,WP_003408673.1,C4IDD4_CLOBU,CLP_3364
1280692.AUJL01000005_gene1705	1280692.AUJL01000005_gene1705	Clostridium cadaveris	1280692	aliases:DINUCLEAR METAL CENTER PROTEIN, YBGI/SA1388 FAMILY,A0A1I2JED0_9CLOT,A0A1I2JED0,SAMN04487885_1025,WP_027637983.1,AUJL01000005_GENE1705
536227.CcarbDRAFT_2241	EET87273.1	Clostridium carboxidivorans	536227	aliases:AKN33665,EET87273,C6PTX4_9CLOT,INTERPRO:IPR002678,CCK:CCAR_23720,CCARBDRAFT_2241,WP_007061126.1,GI:255510973,PROTEIN OF UNKNOWN FUNCTION DUF34,255510973,C6PTX4,EET87273.1,IPR002678
545697.HMPREF0216_02093	EKY26309.1	Clostridium celatum	545697	aliases:WP_005213846.1,EKY26309,L1QE99,EKY26309.1,INTERPRO:IPR002678,HMPREF0216_02093,GI:429185324,L1QE99_9CLOT,DINUCLEAR METAL CENTER PROTEIN, YBGI FAMILY,IPR002678,429185324
394503.Ccel_0544	Ccel_0544	Clostridium cellulolyticum	394503	aliases:CCE:CCEL_0544,CCEL_0544,ACL74926,B8I6N4_CLOCE,INTERPRO:IPR002678,219998325,WP_015924098.1,GI:219998325,ACL74926.1,B8I6N4,PROTEIN OF UNKNOWN FUNCTION DUF34,IPR002678
573061.Clocel_1461	ADL51214.1	Clostridium cellulovorans	573061	aliases:CLOCEL_1461,ADL51214,ADL51214.1,GI:302577202,WP_010075919.1,302577202,PROTEIN OF UNKNOWN FUNCTION DUF34,D9SW70_CLOC7,INTERPRO:IPR002678,D9SW70,CCB:CLOCEL_1461,IPR002678
999411.HMPREF1092_01421	ENZ02186.1	Clostridium colicanis	999411	aliases:WP_002597922.1,N9WGK3_9CLOT,GI:480658150,HMPREF1092_01421,ENZ02186,ENZ02186.1,480658150,N9WGK3,YBGI/FAMILY DINUCLEAR METAL CENTER PROTEIN
332101.JIBU02000004_gene101	332101.JIBU02000004_gene101	Clostridium drakei	332101	aliases:JIBU02000004_GENE101
1294142.CINTURNW_0999	ERK31621.1	Clostridium intestinale	1294142	aliases:U2NRZ5_9CLOT,GI:544195655,ERK31621,WP_021801032.1,U2NRZ5,544195655,ERK31621.1,CINTURNW_0999
431943.CKL_0945	CKL_0945	Clostridium kluyveri	431943	aliases:CKL_0945,A5N6R5_CLOK5,WP_012101325.1,CKL:CKL_0945,146346460,A5N6R5,GI:146346460,EDK32996.1,EDK32996
642492.Clole_2351	Clole_2351	Clostridium lentocellum	642492	aliases:326542200,GI:326542200,ADZ84059,WP_013657353.1,F2JST8,CLE:CLOLE_2351,NGG1P INTERACTING FACTOR 3 PROTEIN, NIF3,F2JST8_CELLD,GTP CYCLOHYDROLASE 1 TYPE 2 HOMOLOG,ADZ84059.1,INTERPRO:IPR002678,CLOLE_2351,IPR002678
748727.CLJU_c08250	ADK13893.1	Clostridium ljungdahlii	748727	aliases:ADK13893,PUTATIVE NGG1P INTERACTING FACTOR 3,33107565,D8GPI4,CLJU_C08250,ADK13893.1,300434126,WP_013237490.1,D8GPI4_CLOLD,GI:300434126,CLJ:CLJU_C08250
1410653.JHVC01000009_gene2852	1410653.JHVC01000009_gene2852	Clostridium lundense	1410653	aliases:JHVC01000009_GENE2852
386415.NT01CX_0033	ABK62243.1	Clostridium novyi	386415	aliases:118135199,A0Q1P0_CLONN,CNO:NT01CX_0033,ABK62243.1,GI:118135199,ABK62243,CONSERVED HYPOTHETICAL PROTEIN TIGR00486,A0Q1P0,NT01CX_0033,4540026,WP_011722536.1
1443122.Z958_03510	Z958_03510	Clostridium novyi	1443122	aliases:658101299,A0A072YPJ6_CLONO,GI:658101299,Z958_03510,WP_039231825.1,KEI13293.1,A0A072YPJ6,KEI13293
742738.HMPREF9460_01489	KGF56022.1	Clostridium orbiscindens	742738	aliases:A0A096CMK5_9FIRM,ANU41286,A0A096CMK5,GI:690811769,FPLA:A4U99_09460,HMPREF9460_01489,KGF56022.1,WP_007487896.1,690811769,KGF56022
1280689.AUJC01000003_gene1242	1280689.AUJC01000003_gene1242	Clostridium paraputrificum	1280689	aliases:A0A174AQG7_9CLOT,NIF3-LIKE DINUCLEAR METAL CENTER HEXAMERIC PROTEIN,AUJC01000003_GENE1242,CP373A1_01500,A0A174AQG7,WP_055253586.1
1262449.CP6013_2222	KER13926.1	Clostridium pasteurianum	1262449	aliases:PUTATIVE GTP CYCLOHYDROLASE 1 TYPE 2,KER13926,A0A0H3J351_CLOPA,IPR002678,WP_003441596.1,662574854,INTERPRO:IPR002678,NGG1P INTERACTING FACTOR 3 PROTEIN, NIF3,CP6013_2222,AJA52344,CPAT:CLPA_C22860,KER13926.1,A0A0H3J351,CLPA_C22860,GI:662574854
86416.Clopa_2219	Clopa_2219	Clostridium pasteurianum	86416	aliases:AGK97096.1,DINUCLEAR METAL CENTER PROTEIN, YBGI/SA1388 FAMILY,WP_015615402.1,R4K5X1_CLOPA,INTERPRO:IPR002678,488450394,CLOPA_2219,CPAS:CLOPA_2219,GI:488450394,AGK97096,R4K5X1,IPR002678
195103.CPF_2261	CPF_2261	Clostridium perfringens	195103	aliases:PATHEMA:CPF_2261,29570633,ABG83194,NIF3 FAMILY PROTEIN,CPF:CPF_2261,WP_003455195.1,A0A0H2YRY4_CLOP1,GI:110674207,A0A0H2YRY4,110674207,ABG83194.1,CPF_2261
1345695.CLSA_c11100	AGX42117.1	Clostridium saccharobutylicum	1345695	aliases:CLSA_C11100,U5MRR1,549808211,WP_022744399.1,AGX42117,AGX42117.1,DINUCLEAR METAL CENTER PROTEIN, YBGI FAMILY,GI:549808211,U5MRR1_CLOSA,CSB:CLSA_C11100
931276.Cspa_c57830	AGF59504.1	Clostridium saccharoperbutylacetonicum	931276	aliases:CSPA_C57830,M1MNN7,WP_015395811.1,AGF59504,GI:451788536,M1MNN7_9CLOT,CSR:CSPA_C57830,451788536,AGF59504.1
931276.Cspa_c09620	AGF54738.1	Clostridium saccharoperbutylacetonicum	931276	aliases:CSPA_C09620,DINUCLEAR METAL CENTER PROTEIN, YBGI/SA1388 FAMILY,WP_015391063.1,M1MEE7,GI:451783770,451783770,AGF54738,AGF54738.1,M1MEE7_9CLOT,CSR:CSPA_C09620
1033737.CAEV01000002_gene2220	1033737.CAEV01000002_gene2220	Clostridium senegalense	1033737	aliases:CAEV01000002_GENE2220
1033737.CAEV01000012_gene2175	1033737.CAEV01000012_gene2175	Clostridium senegalense	1033737	aliases:CAEV01000012_GENE2175
1540257.JQMW01000004_gene484	1540257.JQMW01000004_gene484	Clostridium sp.	1540257	aliases:JQMW01000004_GENE484
1196322.A370_05757	A370_05757	Clostridium sp.	1196322	aliases:DINUCLEAR METAL CENTER PROTEIN, YBGI/SA1388 FAMILY,IPR002678,INTERPRO:IPR002678,K6TGW9,K6TGW9_9CLOT,A370_05757,EKQ50310.1,410595609,EKQ50310,GI:410595609
1499683.CCFF01000017_gene2836	1499683.CCFF01000017_gene2836	Clostridium sp.	1499683	aliases:CCFF01000017_GENE2836
1499684.CCNP01000018_gene1448	1499684.CCNP01000018_gene1448	Clostridium sp.	1499684	aliases:CCNP01000018_GENE1448
1499689.CCNN01000007_gene1971	1499689.CCNN01000007_gene1971	Clostridium sp.	1499689	aliases:CCNN01000007_GENE1971
1499689.CCNN01000007_gene1701	1499689.CCNN01000007_gene1701	Clostridium sp.	1499689	aliases:CCNN01000007_GENE1701
1507.HMPREF0262_01672	ERI99641.1	Clostridium sp.	1507	aliases:INTERPRO:IPR002678,ERI99641,U2F317,ERI99641.1,U2F317_CLOS4,DINUCLEAR METAL CENTER PROTEIN, YBGI FAMILY,IPR002678,GI:543005143,543005143,HMPREF0262_01672
97138.C820_01377	C820_01377	Clostridium sp.	97138	aliases:C820_01377,GTP CYCLOHYDROLASE 1 TYPE 2 HOMOLOG,N1ZNH7_9CLOT,WP_004035818.1,EMZ14119.1,EMZ14119,YBGI/FAMILY DINUCLEAR METAL CENTER PROTEIN,476606529,N1ZNH7,GI:476606529
1487921.DP68_08655	DP68_08655	Clostridium sp.	1487921	aliases:A0A099S781,DP68_08655,A0A099S781_9CLOT,695882179,GI:695882179,KGK87996,KGK87996.1
755731.Clo1100_1578	AEY65799.1	Clostridium sp.	755731	aliases:DINUCLEAR METAL CENTER PROTEIN, YBGI/SA1388 FAMILY,H2JI85,373944878,INTERPRO:IPR002678,WP_014313176.1,AEY65799.1,AEY65799,CLO1100_1578,GI:373944878,IPR002678,H2JI85_9CLOT,CLB:CLO1100_1578
641107.CDLVIII_1398	EHI98097.1	Clostridium sp.	641107	aliases:EHI98097.1,CDLVIII_1398,WP_009168778.1,G7MCI5_9CLOT,EHI98097,INTERPRO:IPR002678,357169923,NGG1P INTERACTING FACTOR 3 PROTEIN, NIF3,GI:357169923,G7MCI5,IPR002678
1304866.K413DRAFT_3828	EXG86969.1	Clostridium sp.	1304866	aliases:WP_025233293.1,DINUCLEAR METAL CENTER PROTEIN, YBGI/SA1388 FAMILY,A0A011A865_9CLOT,K413DRAFT_3828,589402243,GI:589402243,EXG86969,A0A011A865,EXG86969.1
908340.HMPREF9406_0091	EFR38704.1	Clostridium sp.	908340	aliases:EFR38704,312957075,E4LQZ5_9CLOT,E4LQZ5,HMPREF9406_0091,NIF3 (NGG1P INTERACTING FACTOR 3),GI:312957075,EFR38704.1,WP_008818863.1
908340.HMPREF9406_4083	EFR36982.1	Clostridium sp.	908340	aliases:312955317,E4LVS3,GI:312955317,EFR36982.1,HMPREF9406_4083,NIF3 (NGG1P INTERACTING FACTOR 3),WP_008816341.1,EFR36982,E4LVS3_9CLOT
908340.HMPREF9406_4081	EFR37157.1	Clostridium sp.	908340	aliases:HMPREF9406_4081,E4LVS1,WP_008816343.1,EFR37157.1,312955492,GI:312955492,E4LVS1_9CLOT,EFR37157
908340.HMPREF9406_1643	EFR35805.1	Clostridium sp.	908340	aliases:312954125,HMPREF9406_1643,E4LZL5_9CLOT,E4LZL5,DINUCLEAR METAL CENTER PROTEIN, YBGI FAMILY,EFR35805.1,WP_009589091.1,EFR35805,GI:312954125
1163671.JAGI01000002_gene1843	1163671.JAGI01000002_gene1843	Clostridium sp.	1163671	aliases:JAGI01000002_GENE1843
1469948.JPNB01000001_gene1034	1469948.JPNB01000001_gene1034	Clostridium sp.	1469948	aliases:JPNB01000001_GENE1034
1216932.CM240_1566	CM240_1566	Clostridium sp.	1216932	aliases:PUTATIVE GTP CYCLOHYDROLASE 1 TYPE 2,W6RYM9_9CLOT,CDM68724.1,W6RYM9,CM240_1566,CLT:CM240_1566,584456466,UPF0135 PROTEIN,WP_044038028.1,CDM68724,GI:584456466
1414720.CBYM010000007_gene1096	1414720.CBYM010000007_gene1096	Clostridium sp.	1414720	aliases:CBYM010000007_GENE1096
1226325.HMPREF1548_06268	ERI65920.1	Clostridium sp.	1226325	aliases:WP_021639831.1,HMPREF1548_06268,U2B126,542967568,ERI65920.1,U2B126_9CLOT,DINUCLEAR METAL CENTER PROTEIN, YBGI FAMILY,GI:542967568,INTERPRO:IPR002678,ERI65920,IPR002678
457396.CSBG_02430	CSBG_02430	Clostridium sp.	457396	aliases:EEH98804.1,V9HFY4,CSBG_02430,V9HFY4_9CLOT,EEH98804,YBGI/FAMILY DINUCLEAR METAL CENTER PROTEIN,226913603,WP_008677350.1,GI:226913603
1301100.HG529351_gene4258	1301100.HG529351_gene4258	Clostridium sp.	1301100	aliases:HG529351_GENE4258
1301100.HG529351_gene4257	1301100.HG529351_gene4257	Clostridium sp.	1301100	aliases:HG529351_GENE4257
97139.C824_03099	C824_03099	Clostridium sp.	97139	aliases:N2AHA4_9CLOT,GI:476618681,WP_004080869.1,EMZ25585.1,EMZ25585,476618681,YBGI/FAMILY DINUCLEAR METAL CENTER PROTEIN,N2AHA4,C824_03099
1391647.AVSV01000028_gene181	1391647.AVSV01000028_gene181	Clostridium sp.	1391647	aliases:AVSV01000028_GENE181
1105031.HMPREF1141_2697	EJF40130.1	Clostridium sp.	1105031	aliases:GI:394757071,J1H3R2,WP_009064101.1,HMPREF1141_2697,DINUCLEAR METAL CENTER PROTEIN, YBGI FAMILY,394757071,EJF40130,J1H3R2_9CLOT,EJF40130.1
556261.HMPREF0240_02839	EGB92159.1	Clostridium sp.	556261	aliases:EGB92159.1,WP_009004139.1,EGB92159,HMPREF0240_02839,NIF3 FAMILY PROTEIN,324030877,GI:324030877,F0Z157_9CLOT,F0Z157
318464.IO99_00410	IO99_00410	Clostridium sulfidigenes	318464	aliases:A0A084JI96,666993325,A0A084JI96_9CLOT,KEZ88680,KEZ88680.1,IO99_00410,GI:666993325
318464.IO99_07690	IO99_07690	Clostridium sulfidigenes	318464	aliases:IO99_07690,WP_035131979.1,A0A084JDS5_9CLOT,KEZ87109,A0A084JDS5,SMS PROTEIN,KEZ87109.1,GI:666991699,666991699
1230342.CTM_01380	CTM_01380	Clostridium tetanomorphum	1230342	aliases:A0A037ZCM8_CLOTT,CTM_01380,A0A037ZCM8,KAJ53877.1,KAJ53877,GI:618854685,NGG1-INTERACTING FACTOR 3,618854685
1121342.AUCO01000004_gene561	1121342.AUCO01000004_gene561	Clostridium tyrobutyricum	1121342	aliases:AUCO01000004_GENE561,CTYK:CTK_C23990,AND85647
865861.AZSU01000003_gene2057	865861.AZSU01000003_gene2057	Clostridium ultunense	865861	aliases:AZSU01000003_GENE2057
553385.JEMF01000019_gene966	553385.JEMF01000019_gene966	Cobetia crustatorum	553385	aliases:JEMF01000019_GENE966
28258.KP05_04360	KGA02832.1	Cobetia marina	28258	aliases:GI:684135739,684135739,METAL-BINDING PROTEIN,NIF3-LIKE DINUCLEAR METAL CENTER HEXAMERIC PROTEIN,AOM02139,CMAI:BFX80_13620,KGA02832,KGA02832.1,KP05_04360,A0A1C9BHX6,BFX80_13620,A0A1C9BHX6_COBMA
5501.XP_001247972.1	CIHG_05814	Coccidioides immitis	5501	aliases:XM_001247971.1,XP_001247972,119194737,GI:119194737,A0A0J8RTC8,CIHG_05814,NGG1P INTERACTING FACTOR 3 FAMILY PROTEIN,CIM:CIMG_01743,A0A0J8RTC8_COCIT,4566864,CIMG_01743,XP_001247972.1,GENEID:4566864
199306.XP_003065521.1	CPSG_09944	Coccidioides posadasii	199306	aliases:9690991,GI:303311019,GENEID:9690991,303311019,E9DJE5_COCPS,CPW:CPC735_047460,NGG1 INTERACTING FACTOR NIF3,CPC735_047460,E9DJE5,XP_003065521.1,XM_003065475.1,CPSG_09944,XP_003065521
1121346.KB899816_gene3330	1121346.KB899816_gene3330	Cohnella laeviribosi	1121346	aliases:KB899816_GENE3330
1121346.KB899813_gene2265	1121346.KB899813_gene2265	Cohnella laeviribosi	1121346	aliases:KB899813_GENE2265
710243.XP_007599842.1	710243.XP_007599842.1	Colletotrichum fioriniae	710243	aliases:CFJ:CFIO01_06462,XP_007599842,GI:615467184,A0A010RW89_9PEZI,19036312,EXF76538,XM_007599780.1,XP_007599842.1,A0A010RW89,GENEID:19036312,CFIO01_06462,615467184
474922.ELA26050	474922.ELA26050	Colletotrichum gloeosporioides	474922	aliases:NGG1 INTERACTING FACTOR NIF3,KB021084.1:MRNA:COMPLEMENT(JOIN(<146652..147041,147240..147328,147379..147554,147608..>147675)),L2FIQ4,UPI0002A8FEED,KB021084.1:CDS:COMPLEMENT(JOIN(146652..147041,147240..147328,147379..147554,147608..147675)),CGGC5_12932,ELA26050.1,ELA26050
31870.EFQ27498	GLRG_01993	Colletotrichum graminicola	31870	aliases:EFQ27498.1,XP_008091518.1,GLRG_01993,E3Q8Y4,EFQ27498,GG697337.1:MRNA:JOIN(<1126641..1126708,1126769..1126944,1126998..>1127671),UPI0001ECBC89,24407358,GG697337.1:CDS:JOIN(1126641..1126708,1126769..1126944,1126998..1127671),E3Q8Y4_COLGM,GLRG_01993-1
80884.CCF46633	80884.CCF46633	Colletotrichum higginsianum	80884	aliases:PWY-6703,H1W2C0_COLHI,CACQ02008901.1:CDS:COMPLEMENT(JOIN(2087..2326,2374..2762,2816..2991,3051..3118)),PWY-5663,UPA00848,UPI000249F3D7,CCF46633,H1W2C0,PWY-7442,PWY-6983,CACQ02008901.1:MRNA:COMPLEMENT(JOIN(<2087..2326,2374..2762,2816..2991,3051..>3118)),PWY-5664,CCF46633.1,CH063_00625
5465.ENH85811	Cob_06031	Colletotrichum orbiculare	5465	aliases:KB725767.1:MRNA:JOIN(<445207..445274,445334..445509,445558..>446228),COB_06031,3.5.4.16,KB725767.1:CDS:JOIN(445207..445274,445334..445509,445558..446228),ENH85811.1,UPA00848,UPI0002C7CB2A,NGG1 INTERACTING FACTOR,ENH85811,N4VXL1_COLOR,N4VXL1
1173701.A0A066XQP3	1173701.A0A066XQP3	Colletotrichum sublineola	1173701	aliases:A0A066XQP3_COLSU,CSUB01_03761,PUTATIVE GTP CYCLOHYDROLASE 1 TYPE 2 OS=COLLETOTRICHUM SUBLINEOLA GN=CSUB01_03761 PE=3 SV=1,A0A066XQP3
1005048.CFU_0530	CFU_0530	Collimonas fungivorans	1005048	aliases:340550991,G0AHT8,G0AHT8_COLFT,GI:340550991,AEK60366,AEK60366.1,CFU:CFU_0530,CFU_0530
521003.COLINT_02427	EEP44927.1	Collinsella intestinalis	521003	aliases:C4F8Q5,IPR002678,GI:229809160,PUTATIVE DINUCLEAR METAL CENTER PROTEIN, YBGI FAMILY,INTERPRO:IPR002678,WP_006722671.1,COLINT_02427,229809160,C4F8Q5_9ACTN,EEP44927,EEP44927.1
742722.HMPREF9463_01619	KGI72972.1	Collinsella sp.	742722	aliases:A0A096LLC4_9ACTN,693587914,KGI72972,KGI72972.1,GI:693587914,HMPREF9463_01619,A0A096LLC4,WP_035138468.1
445975.COLSTE_01578	EEA90227.1	Collinsella stercoris	445975	aliases:210159256,PUTATIVE DINUCLEAR METAL CENTER PROTEIN, YBGI FAMILY,GI:210159256,INTERPRO:IPR002678,B6GBW3_9ACTN,WP_006721216.1,B6GBW3,COLSTE_01578,IPR002678,EEA90227.1,EEA90227
742742.HMPREF9452_00239	EGX67918.1	Collinsella tanakaei	742742	aliases:WP_009140276.1,G1WFX6,HMPREF9452_00239,EGX67918.1,GI:345898028,345898028,G1WFX6_9ACTN,EGX67918
8932.XP_005511355.1	NIF3L1	Columba livia	8932	aliases:R7VV03,GENEID:102098252,A306_11046,543740948,102098552,543740946,238909,TAXON:8932,XP_005511355.1,GENEID:102098552,NIF3-LIKE PROTEIN 1,GI:543740948,XM_005511298.1,CDD:238909,CLV:102098552,NIF3-LIKE PROTEIN 1 ISOFORM X1,R7VV03_COLLI,XP_005511355,102098252,8932,GI:543740946,NIF3L1
1265503.KB905164_gene1945	1265503.KB905164_gene1945	Colwellia piezophila	1265503	aliases:KB905164_GENE1945
28229.ND2E_4351	ND2E_4351	Colwellia psychrerythraea	28229	aliases:694334417,KGJ87613.1,INTERPRO:IPR002678,NGG1P INTERACTING FACTOR 3 PROTEIN, NIF3,KGJ87613,ND2E_4351,GI:694334417,IPR002678
1458427.BAWN01000015_gene1030	1458427.BAWN01000015_gene1030	Comamonadaceae bacterium	1458427	aliases:BAWN01000015_GENE1030
1219031.BBJR01000081_gene1070	MA05_16495	Comamonas aquatica	1219031	aliases:WP_045267494.1,A0A1B2D6L3_9BURK,NIF3-LIKE DINUCLEAR METAL CENTER HEXAMERIC PROTEIN,BBJR01000081_GENE1070,MA05_16495,A0A1B2D6L3
1223521.BBJX01000006_gene1693	1223521.BBJX01000006_gene1693	Comamonas granuli	1223521	aliases:BBJX01000006_GENE1693
688245.CtCNB1_0744	ACY31490.1	Comamonas testosteroni	688245	aliases:GI:262207392,CTCNB1_0744,CTT:CTCNB1_0744,HYPOTHETICAL CONSERVED PROTEIN,D0J023,ACY31490,ACY31490.1,262207392,D0J023_COMT2
399795.CtesDRAFT_PD4327	EED69379.1	Comamonas testosteroni	399795	aliases:B7WV04_COMTK,B7WV04,INTERPRO:IPR002678,CTESDRAFT_PD4327,GI:220714011,EED69379,EED69379.1,PROTEIN OF UNKNOWN FUNCTION DUF34,220714011,IPR002678
1121351.AUAP01000008_gene1440	1121351.AUAP01000008_gene1440	Conchiformibius kuhniae	1121351	aliases:AUAP01000008_GENE1440
1121352.JHZP01000001_gene887	1121352.JHZP01000001_gene887	Conchiformibius steedae	1121352	aliases:JHZP01000001_GENE887
469383.Cwoe_4390	Cwoe_4390	Conexibacter woesei	469383	aliases:ADB52804,CWO:CWOE_4390,INTERPRO:IPR002678,ADB52804.1,283950060,GI:283950060,D3F706,PROTEIN OF UNKNOWN FUNCTION DUF34,CWOE_4390,D3F706_CONWI,WP_012935855.1,IPR002678
469383.Cwoe_1390	Cwoe_1390	Conexibacter woesei	469383	aliases:ADB49819.1,GI:283947075,283947075,D3EYU5,INTERPRO:IPR002678,D3EYU5_CONWI,CWOE_1390,CWO:CWOE_1390,PROTEIN OF UNKNOWN FUNCTION DUF34,ADB49819,WP_012932870.1,IPR002678
1283299.AUKG01000001_gene2696	1283299.AUKG01000001_gene2696	Conexibacter woesei	1283299	aliases:AUKG01000001_GENE2696
314285.KT71_10282	KT71_10282	Congregibacter litoralis	314285	aliases:WP_008294490.1,EAQ99008,GI:88701904,EAQ99008.1,DINUCLEAR METAL CENTER PROTEIN, YBGI FAMILY,88701904,A4A5D7_9GAMM,A4A5D7,KT71_10282
80637.XP_007763761.1	80637.XP_007763761.1	Coniophora puteana	80637	aliases:XP_007763761,19211165,INTERPRO:IPR002678,CPUT:CONPUDRAFT_87191,XP_007763761.1,GENEID:19211165,JGIDB:CONPU1_87191,628826915,NGG1P INTERACTING FACTOR 3,GI:628826915,CONPUDRAFT_87191,XM_007765571.1,CONPU1_87191,IPR002678
61459.XP_007781560.1	W97_05636	Coniosporium apollinis	61459	aliases:R7YWM6,19902947,667834782,XP_007781560.1,R7YWM6_CONA1,GENEID:19902947,XM_007783370.1,W97_05636,XP_007781560,GI:667834782
61459.XP_007779137.1	W97_03048	Coniosporium apollinis	61459	aliases:R7YPG4_CONA1,R7YPG4,XP_007779137,XM_007780947.1,W97_03048,19900359,GI:667829936,GENEID:19900359,XP_007779137.1,667829936
5346.XP_001829547.2	CC1G_00726	Coprinopsis cinerea	5346	aliases:GENEID:6005980,6005980,XP_001829547.2,299756724,XP_001829547,GI:299756724,NGG1 INTERACTING FACTOR 3,XM_001829495.2,A8N3H0,CCI:CC1G_00726,A8N3H0_COPC7,CC1G_00726
469596.HMPREF9488_02204	EFW04475.1	Coprobacillus sp.	469596	aliases:319807896,EFW04475,EFW04475.1,E7GBR3_9FIRM,E7GBR3,HMPREF9488_02204,GI:319807896,WP_008789304.1
469596.HMPREF9488_01588	EFW05006.1	Coprobacillus sp.	469596	aliases:E7G9Z8_9FIRM,E7G9Z8,EFW05006,319808454,HMPREF9488_01588,EFW05006.1,WP_008788696.1,GI:319808454
469596.HMPREF9488_00704	EFW06065.1	Coprobacillus sp.	469596	aliases:EFW06065,HMPREF9488_00704,319809652,E7G7J0_9FIRM,GI:319809652,E7G7J0,WP_008787820.1,EFW06065.1
1349822.NSB1T_04515	ERM88286.1	Coprobacter fastidiosus	1349822	aliases:GTP CYCLOHYDROLASE 1 TYPE 2 HOMOLOG,NSB1T_04515,U5CH30_9BACT,ERM88286.1,548783677,YBGI/FAMILY DINUCLEAR METAL CENTER PROTEIN,ERM88286,U5CH30,WP_022602685.1,GI:548783677
1259795.ARJK01000003_gene836	1259795.ARJK01000003_gene836	Coprothermobacter platensis	1259795	aliases:ARJK01000003_GENE836
309798.COPRO5265_1031	ACI17641.1	Coprothermobacter proteolyticus	309798	aliases:ACI17641,B5Y9A2_COPPD,GI:206738563,B5Y9A2,206738563,COPRO5265_1031,WP_012544293.1,ACI17641.1,CPO:COPRO5265_1031
583355.Caka_2342	Caka_2342	Coraliomargarita akajimensis	583355	aliases:293615204,ADE55359.1,WP_013044081.1,INTERPRO:IPR002678,ADE55359,D5EMW9_CORAD,GI:293615204,CAA:CAKA_2342,CAKA_2342,D5EMW9,PROTEIN OF UNKNOWN FUNCTION DUF34,IPR002678
73501.XP_006666506.1	CCM_01287	Cordyceps militaris	73501	aliases:XP_006666506,573977122,CMT:CCM_01287,CCM_01287,XP_006666506.1,GI:573977122,18163318,G3J458_CORMM,GENEID:18163318,UPF0135 PROTEIN,XM_006666443.1,G3J458
1232436.CAPF01000014_gene757	1232436.CAPF01000014_gene757	Coriobacteriaceae bacterium	1232436	aliases:CAPF01000014_GENE757
700015.Corgl_0914	Corgl_0914	Coriobacterium glomerans	700015	aliases:F2N9J6,PROTEIN OF UNKNOWN FUNCTION DUF34,CORGL_0914,WP_013708768.1,328455831,AEB07025.1,CGO:CORGL_0914,INTERPRO:IPR002678,AEB07025,IPR002678,GI:328455831,F2N9J6_CORGP
525260.HMPREF0276_1811	EEI14232.1	Corynebacterium accolens	525260	aliases:GTP CYCLOHYDROLASE 1 TYPE 2 HOMOLOG,23249805,227076269,GI:227076269,EEI14232.1,HMPREF0276_1811,WP_005278215.1,C0WK25_9CORY,DINUCLEAR METAL CENTER PROTEIN, YBGI FAMILY,EEI14232,C0WK25
649754.HMPREF0281_02269	EFG80178.1	Corynebacterium ammoniagenes	649754	aliases:EFG80178,GTP CYCLOHYDROLASE 1 TYPE 2 HOMOLOG,D5P0Y1_CORAM,INTERPRO:IPR002678,GI:295966907,295966907,WP_003849095.1,DINUCLEAR METAL CENTER PROTEIN, YBGI FAMILY,APT82237,EFG80178.1,D5P0Y1,HMPREF0281_02269,CAMG:CAMM_04695,IPR002678
553204.CORAM0001_1495	EEB62955.1	Corynebacterium amycolatum	553204	aliases:E2MX70_CORAY,GTP CYCLOHYDROLASE 1 TYPE 2 HOMOLOG,WP_005511048.1,EEB62955.1,E2MX70,DINUCLEAR METAL CENTER PROTEIN, YBGI FAMILY,EEB62955,CORAM0001_1495,29694137,213951565,GI:213951565
1348662.CARG_06965	CARG_06965	Corynebacterium argentoratense	1348662	aliases:AGU15517,U3GZQ2,U3GZQ2_9CORY,GI:533216189,CARG_06965,533216189,AGU15517.1,CAZ:CARG_06965
191610.CATYP_07645	AIG64479.1	Corynebacterium atypicum	191610	aliases:GTP CYCLOHYDROLASE 1 TYPE 2 HOMOLOG,667687867,CAX:CATYP_07645,A0A075TSG3_9CORY,GI:667687867,AIG64479,AIG64479.1,WP_038606250.1,CATYP_07645,A0A075TSG3
548476.cauri_1746	cauri_1746	Corynebacterium aurimucosum	548476	aliases:GI:227454586,227454586,ACP33339.1,WP_010190639.1,CAURI_1746,CAR:CAURI_1746,C3PHN5_CORA7,31924373,C3PHN5,ACP33339
1121353.H924_09430	H924_09430	Corynebacterium callunae	1121353	aliases:M1UMD1_9CORY,GTP CYCLOHYDROLASE 1 TYPE 2 HOMOLOG,WP_015651755.1,H924_09430,AGG67324,AGG67324.1,459385033,GI:459385033,CCN:H924_09430,M1UMD1
1121354.AQUV01000001_gene1420	1121354.AQUV01000001_gene1420	Corynebacterium capitovis	1121354	aliases:AQUV01000001_GENE1420
1285583.CCASEI_05160	AHI19608.1	Corynebacterium casei	1285583	aliases:GTP CYCLOHYDROLASE 1 TYPE 2 HOMOLOG,CCG:CCASEI_05160,582016262,AHI19608.1,WP_025387351.1,AHI19608,W5XZG4,CCASEI_05160,GI:582016262,W5XZG4_9CORY
1121355.KB903376_gene1166	1121355.KB903376_gene1166	Corynebacterium caspium	1121355	aliases:KB903376_GENE1166
1121356.AQUW01000001_gene1484	1121356.AQUW01000001_gene1484	Corynebacterium ciconiae	1121356	aliases:AQUW01000001_GENE1484
698964.CDPW8_1672	AEX70324.1	Corynebacterium diphtheriae	698964	aliases:GTP CYCLOHYDROLASE 1 TYPE 2,A0A2C8DAY1_CORDP,AEX70324.1,FRC0043_02534,A0A2C8DAY1,AEX70324,CDPW8_1672,CDW:CDPW8_1672,GI:372117854,372117854
558173.CDOO_09810	CDOO_09810	Corynebacterium doosanense	558173	aliases:GI:697778795,A0A097IHC2_9CORY,CDO:CDOO_09810,WP_018020790.1,AIT61531,GTP CYCLOHYDROLASE 1 TYPE 2 HOMOLOG,697778795,A0A097IHC2,AIT61531.1,CDOO_09810
1035195.HMPREF9997_01765	EKX89522.1	Corynebacterium durum	1035195	aliases:429146469,GTP CYCLOHYDROLASE 1 TYPE 2 HOMOLOG,IPR002678,INTERPRO:IPR002678,HMPREF9997_01765,WP_006063993.1,DINUCLEAR METAL CENTER PROTEIN, YBGI FAMILY,L1ME54,L1ME54_9CORY,GI:429146469,EKX89522,EKX89522.1
196164	196164	Corynebacterium efficiens	196164	aliases:Q8FNK9,23493977,BAC18945,CEF:CE2135,Q8FNK9_COREF
1451189.CFAL_04045	CFAL_04045	Corynebacterium falsenii	1451189	aliases:GTP CYCLOHYDROLASE 1 TYPE 2 HOMOLOG,CFN:CFAL_04045,GI:578014608,578014608,W5WQ09,AHI02866,W5WQ09_9CORY,CFAL_04045,AHI02866.1
1121360.AUAQ01000011_gene423	1121360.AUAQ01000011_gene423	Corynebacterium freiburgense	1121360	aliases:AUAQ01000011_GENE423
585529.HMPREF0291_11185	EFK53528.1	Corynebacterium genitalium	585529	aliases:GI:300532467,EFK53528,WP_005289420.1,D7WEF1_9CORY,DINUCLEAR METAL CENTER PROTEIN, YBGI FAMILY,GTP CYCLOHYDROLASE 1 TYPE 2 HOMOLOG,HMPREF0291_11185,EFK53528.1,300532467,D7WEF1
548477.HMPREF0294_1590	EEI26966.1	Corynebacterium glucuronolyticum	548477	aliases:227091654,A0A1W1UV39,GTP CYCLOHYDROLASE 1 TYPE 2 HOMOLOG,SAMN05660745_01333,EEI26966.1,GI:227091654,DINUCLEAR METAL CENTER PROTEIN, YBGI FAMILY,HMPREF0294_1590,EEI26966,A0A1W1UV39_9CORY
196627.cg2457	Cgl2238	Corynebacterium glutamicum	196627	aliases:GENEID:3344068,GI:62391079,GTP CYCLOHYDROLASE 1 TYPE 2 HOMOLOG,CAF20580,YP_226481,3344068,CGL2238,CG2457,NP_601440.1,WP_011014977.1,YP_226481.1,Q8NNG6_CORGL,1020190,62391079,CGB:CG2457,Q8NNG6
1404245.CGLY_10080	CGLY_10080	Corynebacterium glycinophilum	1404245	aliases:X5ECX0_9CORY,GI:610393498,GTP CYCLOHYDROLASE 1 TYPE 2 HOMOLOG,CGLY_10080,AHW64461.1,610393498,AHW64461,NIF3 (NGG1P INTERACTING FACTOR 3),X5ECX0,CGY:CGLY_10080
1121362.A605_09980	A605_09980	Corynebacterium halotolerans	1121362	aliases:GTP CYCLOHYDROLASE 1 TYPE 2 HOMOLOG,451904111,M1NNU8_9CORY,AGF72998,CHN:A605_09980,A605_09980,GI:451904111,AGF72998.1,WP_015401417.1,M1NNU8
156978.CIMIT_08555	AIJ33953.1	Corynebacterium imitans	156978	aliases:GTP CYCLOHYDROLASE 1 TYPE 2 HOMOLOG,A0A076NKM1,GI:672594976,WP_038591694.1,AIJ33953.1,CII:CIMIT_08555,AIJ33953,A0A076NKM1_9CORY,SAMEA4535761_01772,CIMIT_08555,672594976
306537.jk0667	jk0667	Corynebacterium jeikeium	306537	aliases:CAI36829.1,Q4JWH8,UNIPROTKB/TREMBL:Q4JWH8,GTP CYCLOHYDROLASE 1 TYPE 2 HOMOLOG,JK0667,CAI36829,68263341,GI:68263341,Q4JWH8_CORJK,IPR017221,INTERPRO:IPR002678,IPR002678,CJK:JK0667,INTERPRO:IPR017221
645127.ckrop_0682	ckrop_0682	Corynebacterium kroppenstedtii	645127	aliases:CKROP_0682,GTP CYCLOHYDROLASE 1 TYPE 2 HOMOLOG,237758193,ACR17443.1,CKP:CKROP_0682,C4LHY8,WP_012731330.1,ACR17443,C4LHY8_CORK4,GI:237758193
525263.HMPREF0298_1156	EEI17027.1	Corynebacterium lipophiloflavum	525263	aliases:HMPREF0298_1156,GTP CYCLOHYDROLASE 1 TYPE 2 HOMOLOG,227079064,EEI17027.1,WP_006839882.1,C0XRT6,DINUCLEAR METAL CENTER PROTEIN, YBGI FAMILY,GI:227079064,C0XRT6_CORLD,EEI17027
1121363.KB902204_gene1227	1121363.KB902204_gene1227	Corynebacterium lubricantis	1121363	aliases:KB902204_GENE1227
1224163.B841_09135	B841_09135	Corynebacterium maris	1224163	aliases:GTP CYCLOHYDROLASE 1 TYPE 2 HOMOLOG,AGS35300.1,CMD:B841_09135,528325985,S5T3S9,B841_09135,AGS35300,S5T3S9_9CORY,WP_020935233.1,GI:528325985
1121364.ATVG01000001_gene1183	1121364.ATVG01000001_gene1183	Corynebacterium massiliense	1121364	aliases:ATVG01000001_GENE1183
1121365.AQXB01000001_gene1115	1121365.AQXB01000001_gene1115	Corynebacterium mastitidis	1121365	aliases:AQXB01000001_GENE1115
553207.HMPREF0299_6902	EFM48660.1	Corynebacterium matruchotii	553207	aliases:EFM48660,GTP CYCLOHYDROLASE 1 TYPE 2 HOMOLOG,EFM48660.1,HMPREF0299_6902,E0DGA7_9CORY,DINUCLEAR METAL CENTER PROTEIN, YBGI FAMILY,WP_005525895.1,305659160,GI:305659160,E0DGA7
863239.AFIZ01000047_gene594	863239.AFIZ01000047_gene594	Corynebacterium nuruki	863239	aliases:AFIZ01000047_GENE594
1121366.KB892438_gene772	1121366.KB892438_gene772	Corynebacterium pilosum	1121366	aliases:KB892438_GENE772
1121367.AQXC01000004_gene708	1121367.AQXC01000004_gene708	Corynebacterium propinquum	1121367	aliases:AQXC01000004_GENE708
525264.HMPREF0305_12213	EFQ79703.1	Corynebacterium pseudogenitalium	525264	aliases:E2S6R1_9CORY,HMPREF0305_12213,E2S6R1,GI:311303624,EFQ79703,WP_005324388.1,DINUCLEAR METAL CENTER PROTEIN, YBGI FAMILY,GTP CYCLOHYDROLASE 1 TYPE 2 HOMOLOG,311303624,EFQ79703.1
1719.CPTC_02081	AIG12369.1	Corynebacterium pseudotuberculosis	1719	aliases:AIG09733,GTP CYCLOHYDROLASE 1 TYPE 2 HOMOLOG,AIG12369.1,CPSU:CPTB_01677,GI:666112310,666112310,12298640,D9QBN0_CORP2,WP_013242353.1,D9QBN0,CPTC_02081,AIG12369,CPC231_1490
1125779.HMPREF1219_01043	EPD69714.1	Corynebacterium pyruviciproducens	1125779	aliases:S3A041_9CORY,GTP CYCLOHYDROLASE 1 TYPE 2 HOMOLOG,GI:512070360,WP_016457811.1,512070360,EPD69714,EPD69714.1,HMPREF1219_01043,S3A041,YBGI/FAMILY DINUCLEAR METAL CENTER PROTEIN
662755.CRES_0716	CRES_0716	Corynebacterium resistens	662755	aliases:F8DZM5,F8DZM5_CORRG,336101253,GI:336101253,CRES_0716,WP_013888091.1,AEI09073.1,CRD:CRES_0716,GTP CYCLOHYDROLASE 1 TYPE 2 HOMOLOG,AEI09073
1232427.CAVS020000023_gene57	1232427.CAVS020000023_gene57	Corynebacterium sp.	1232427	aliases:CAVS020000023_GENE57
1487956.DR71_369	DR71_369	Corynebacterium sp.	1487956	aliases:A0A088QUL8,GTP CYCLOHYDROLASE 1 TYPE 2 HOMOLOG,GI:685193285,NIF3 FAMILY PROTEIN,AIN81451,COA:DR71_369,A0A088QUL8_9CORY,AIN81451.1,685193285,DR71_369
1414719.CBYN010000097_gene1168	1414719.CBYN010000097_gene1168	Corynebacterium sp.	1414719	aliases:CBYN010000097_GENE1168
1203566.HMPREF1285_00525	ERS80633.1	Corynebacterium sp.	1203566	aliases:HMPREF1285_00525,550782637,ERS80633,ERS80633.1,YBGI/FAMILY DINUCLEAR METAL CENTER PROTEIN,GI:550782637
1203567.HMPREF1286_01418	ERS48597.1	Corynebacterium sp.	1203567	aliases:HMPREF1286_01418,ERS48597.1,GI:550749199,YBGI/FAMILY DINUCLEAR METAL CENTER PROTEIN,ERS48597,550749199
1203622.HMPREF1290_01279	ERS73279.1	Corynebacterium sp.	1203622	aliases:WP_023019185.1,GTP CYCLOHYDROLASE 1 TYPE 2 HOMOLOG,U7MT00,ERS73279.1,ERS73279,GI:550775205,YBGI/FAMILY DINUCLEAR METAL CENTER PROTEIN,550775205,HMPREF1290_01279,U7MT00_9CORY
1203632.HMPREF1300_01111	ERS74123.1	Corynebacterium sp.	1203632	aliases:ERS74123,GI:550776069,550776069,ERS74123.1,HMPREF1300_01111,YBGI/FAMILY DINUCLEAR METAL CENTER PROTEIN
1111729.ATYV01000001_gene2301	1111729.ATYV01000001_gene2301	Corynebacterium sputi	1111729	aliases:ATYV01000001_GENE2301
525268.HMPREF0308_0884	EEI78872.1	Corynebacterium striatum	525268	aliases:HMPREF0308_0884,GI:227198824,C2CNA5,ART20868,EEI78872.1,227198824,DINUCLEAR METAL CENTER PROTEIN, YBGI FAMILY,WP_005528568.1,C2CNA5_CORST,CSTR:CBE89_04705,EEI78872
1200352.A606_04305	A606_04305	Corynebacterium terpenotabidum	1200352	aliases:AGP30510.1,AGP30510,521017958,A606_04305,S4XFU5_9CORY,GI:521017958,CTER:A606_04305,WP_020440872.1,S4XFU5
1203190.CAJP01000003_gene557	1203190.CAJP01000003_gene557	Corynebacterium timonense	1203190	aliases:A0A1H1MDB5_9CORY,GTP CYCLOHYDROLASE 1 TYPE 2 HOMOLOG,WP_019193161.1,A0A1H1MDB5,CAJP01000003_GENE557,SAMN04488539_0484
1401064.HMPREF2129_09680	KGF21079.1	Corynebacterium tuscaniense	1401064	aliases:GTP CYCLOHYDROLASE 1 TYPE 2 HOMOLOG,WP_034665966.1,HMPREF2129_09680,KGF21079,690773614,A0A096AJ92_9CORY,GI:690773614,A0A096AJ92,KGF21079.1
945712.CULC22_01592	AEG84302.1	Corynebacterium ulcerans	945712	aliases:CUL131002_1586C,GTP CYCLOHYDROLASE 1 TYPE 2 HOMOLOG,A0A0E3N616_CORUL,GI:334699506,CULC22_01592,A0A0E3N616,AIU92196,AEG84302.1,AEG84302,334699506,CUZ:CUL05146_1634
1121370.AQUY01000002_gene1833	1121370.AQUY01000002_gene1833	Corynebacterium ulceribovis	1121370	aliases:AQUY01000002_GENE1833
504474.cu1298	cu1298	Corynebacterium urealyticum	504474	aliases:B1VGF1,INTERPRO:IPR017221,INTERPRO:IPR002678,CAQ05258,GI:171852282,CUR:CU1298,UNIPROTKB/TREMBL:B1VGF1,WP_012360546.1,GTP CYCLOHYDROLASE 1 TYPE 2 HOMOLOG,CU1298,CAQ05258.1,B1VGF1_CORU7,IPR002678,IPR017221,171852282
1224164.B843_09330	B843_09330	Corynebacterium vitaeruminis	1224164	aliases:CVT:B843_09330,GTP CYCLOHYDROLASE 1 TYPE 2 HOMOLOG,W5Y1U5_9CORY,B843_09330,AHI23251,GI:582019908,582019908,AHI23251.1,W5Y1U5
1437425.CSEC_0893	CSEC_0893	Criblamydia sequanensis	1437425	aliases:A0A090CYS9,GI:678277462,A0A090CYS9_9BACT,CDR33721.1,678277462,CDR33721,CSEC_0893
1437425.CSEC_1590	CSEC_1590	Criblamydia sequanensis	1437425	aliases:CSEC_1590,GI:678276078,CDR34404,CDR34404.1,678276078,WP_053331914.1,A0A090E0S9_9BACT,A0A090E0S9
10029.XP_007611172.1	Nif3l1	Cricetulus griseus	10029	aliases:XP_007611172.1,XP_007645770.1,I79_014620,10029,XP_003507078,100758293,PUTATIVE GTP CYCLOHYDROLASE 1 TYPE 2 NIF3L1 ISOFORM X1,238909,NIF3-LIKE PROTEIN 1,GI:625239879,GENEID:100758007,625239879,XM_003507030.2,GI:625239876,TAXON:10029,G3HUK8,NIF3L1,XP_007611172,100758007,CDD:238909,NGG1 INTERACTING FACTOR 3 LIKE 1,G3HUK8_CRIGR,GENEID:100758293,CGE:100758007,625239876
1173022.Cri9333_0250	AFZ11242.1	Crinalium epipsammum	1173022	aliases:CRI9333_0250,WP_015201386.1,428245462,INTERPRO:IPR002678,AFZ11242,CEP:CRI9333_0250,GI:428245462,NGG1P INTERACTING FACTOR 3 PROTEIN, NIF3,AFZ11242.1,K9VUT7_9CYAN,K9VUT7,IPR002678
216432.CA2559_07841	EAP85927.1	Croceibacter atlanticus	216432	aliases:GTP CYCLOHYDROLASE 1 TYPE 2 HOMOLOG,WP_013187313.1,A3UBC6_CROAH,EAP85927,GI:83848057,CA2559_07841,CAT:CA2559_07841,83848057,EAP85927.1,A3UBC6
1408433.JHXV01000036_gene238	1408433.JHXV01000036_gene238	Crocinitomix catalasitica	1408433	aliases:JHXV01000036_GENE238
1073999.BN137_3003	BN137_3003	Cronobacter condimenti	1073999	aliases:CCJ73624.1,426546420,CCJ73624,K8ACZ3_9ENTR,CCON:AFK62_06070,ALB62091,K8ACZ3,FIG042796: HYPOTHETICAL PROTEIN,WP_007676809.1,GI:426546420,BN137_3003
1001240.GY21_09650	GY21_09650	Cryobacterium roopkundense	1001240	aliases:A0A099JDT7_9MICO,GY21_09650,KGJ75697,A0A099JDT7,WP_035836517.1,694297013,KGJ75697.1,GI:694297013
469378.Ccur_06950	Ccur_06950	Cryptobacterium curtum	469378	aliases:UNCHARACTERIZED CONSERVED PROTEIN,CCU:CCUR_06950,C7MNB5_CRYCD,CCUR_06950,GI:256583271,256583271,ACU94405,C7MNB5,ACU94405.1
552467.XP_003197157.1	CGB_L3230C	Cryptococcus gattii	552467	aliases:XM_003197109.1,E6REA6_CRYGW,GENEID:10185718,XP_003197157,GI:321264880,CGI:CGB_L3230C,E6REA6,321264880,XP_003197157.1,10185718,CGB_L3230C
5207.AAW45124	CNH02550	Cryptococcus neoformans	5207	aliases:XP_772393,PWY-6703,Q5KCX5_CRYNJ,CNH02550,Q55IS4,PWY-6147,UPA00848,XP_572431.1,Q5KCX5,PWY-5664,UPI000042D53E,PWY-6983,3259311,AAW45124.1,CNH02550-1,PWY-5663,CNB:CNBL2590,AAW45124
7176.CPIJ009670-PA	6042569	Culex quinquefasciatus	7176	aliases:XP_001852243,XP_001852243.1,UPI00016D64A6,XM_001852192,CPIPJ_CPIJ009670,PWY-6983,XM_001852192.1,PWY-5663,PWY-6703,CPIJ009670,NIF3-LIKE PROTEIN 1,B0WSH9_CULQU,UPA00848,CQU:CPIPJ_CPIJ009670,EDS33909.1,CPIJ009670-RA,6042569,PWY-5664,PWY-6147,PROTEIN ANON-35F/36A,CPIJ009670-PA,PWY-7442,B0WSH9
266264.Rmet_3232	Rmet_3232	Cupriavidus metallidurans	266264	aliases:Q1LIC2_CUPMC,RMET_3232,Q1LIC2,24151360,ABF10104,PUTATIVE METAL-BINDING PROTEIN,ABF10104.1,WP_011517714.1,RME:RMET_3232,93356015,GI:93356015
388051.AUFE01000022_gene4815	388051.AUFE01000022_gene4815	Cupriavidus sp.	388051	aliases:AUFE01000022_GENE4815
1217718.ALOU01000072_gene5006	1217718.ALOU01000072_gene5006	Cupriavidus sp.	1217718	aliases:ALOU01000072_GENE5006
977880.RALTA_A2859	CAQ70784.1	Cupriavidus taiwanensis	977880	aliases:CAQ70784.1,B3R784_CUPTR,RALTA_A2859,CONSERVED HYPOTHETICAL PROTEIN, DUF34 COG0327,INTERPRO:IPR002678,B3R784,193224773,29760432,GI:193224773,CAQ70784,UNIPROTKB/TREMBL:B3R784,WP_012354076.1,CTI:RALTA_A2859,IPR002678
1479623.JHEL01000015_gene663	1479623.JHEL01000015_gene663	Curtobacterium sp.	1479623	aliases:JHEL01000015_GENE663
1173021.ALWA01000039_gene1875	1173021.ALWA01000039_gene1875	cyanobacterium PCC	1173021	aliases:ALWA01000039_GENE1875
395961.Cyan7425_3201	ACL45529.1	Cyanothece sp.	395961	aliases:ACL45529.1,B8HNU2_CYAP4,B8HNU2,ACL45529,INTERPRO:IPR002678,GI:219865190,PROTEIN OF UNKNOWN FUNCTION DUF34,WP_012628592.1,CYAN7425_3201,219865190,IPR002678,CYN:CYAN7425_3201
1288963.ADIS_2880	ADIS_2880	Cyclobacteriaceae bacterium	1288963	aliases:496562292,EON76430,EON76430.1,GI:496562292,ADIS_2880
880070.Cycma_3176	Cycma_3176	Cyclobacterium marinum	880070	aliases:AEL26904.1,GTP CYCLOHYDROLASE 1 TYPE 2 HOMOLOG,GI:342354374,AEL26904,CYCMA_3176,CMR:CYCMA_3176,NGG1P INTERACTING FACTOR 3 PROTEIN, NIF3,342354374,IPR017221,G0J713_CYCMS,INTERPRO:IPR002678,WP_014021194.1,IPR002678,G0J713,INTERPRO:IPR017221
641524.ADICYQ_4727	EPR66240.1	Cyclobacterium qasimii	641524	aliases:WP_020893267.1,GTP CYCLOHYDROLASE 1 TYPE 2 HOMOLOG,S7V7Q2_9BACT,GI:523597042,523597042,ADICYQ_4727,EPR66240,S7V7Q2,EPR66240.1
533240.CRC_02574	CRC_02574	Cylindrospermopsis raciborskii	533240	aliases:CRC_02574,281193992,D4TJI5_9CYAN,D4TJI5,WP_006278249.1,GI:281193992,EFA68958.1,34475696,PROTEIN OF UNKNOWN FUNCTION DUF34,EFA68958
56107.Cylst_2185	Cylst_2185	Cylindrospermum stagnale	56107	aliases:DINUCLEAR METAL CENTER PROTEIN, YBGI/SA1388 FAMILY,WP_015207675.1,AFZ24421,428258471,INTERPRO:IPR002678,CYLST_2185,CSG:CYLST_2185,K9WX92_9NOST,K9WX92,AFZ24421.1,GI:428258471,IPR002678
244447.XP_008312828.1	nif3l1	Cynoglossus semilaevis	244447	aliases:GI:657754581,XM_008314606.1,GI:657754583,GI:657754579,657754579,244447,657754583,NIF3-LIKE PROTEIN 1,103381972,XP_008312828.1,103381974,TAXON:244447,657754581,GENEID:103381972,CDD:214789,214789,CSEM:103381974,NIF3L1,GENEID:103381974,PUTATIVE GTP CYCLOHYDROLASE 1 TYPE 2 NIF3L1,XP_008312828
293227.XP_008719541.1	293227.XP_008719541.1	Cyphellophora europaea	293227	aliases:W2RR82,GENEID:19974333,XM_008721319.1,GI:671379301,HMPREF1541_06994,XP_008719541,19974333,671379301,XP_008719541.1,W2RR82_9EURO
293227.XP_008712211.1	293227.XP_008712211.1	Cyphellophora europaea	293227	aliases:GENEID:19976654,XP_008712211,XM_008713989.1,671145816,19976654,W2SBU3,HMPREF1541_09315,XP_008712211.1,GI:671145816,YBGI/FAMILY DINUCLEAR METAL CENTER PROTEIN,W2SBU3_9EURO
1121373.KB903665_gene3022	1121373.KB903665_gene3022	Cytophaga aurantiaca	1121373	aliases:KB903665_GENE3022
869213.JCM21142_8	JCM21142_8	Cytophaga fermentans	869213	aliases:GAF01402.1,GTP CYCLOHYDROLASE 1 TYPE 2 HOMOLOG,GAF01402,W7Y0D2,W7Y0D2_9BACT,588492514,JCM21142_8,GI:588492514
269798.CHU_1805	CHU_1805	Cytophaga hutchinsonii	269798	aliases:GTP CYCLOHYDROLASE 1 TYPE 2 HOMOLOG,GI:110280886,110280886,CHU:CHU_1805,WP_011585189.1,ABG59072.1,ABG59072,CHU_1805,Q11U42,Q11U42_CYTH3
430498.S8AAL8	H072_6299	Dactylellina haptotyla	430498	aliases:S8AAL8_DACHA,XP_011112096.1,22884104,S8AAL8,H072_6299
35754.JNYJ01000030_gene7590	35754.JNYJ01000030_gene7590	Dactylosporangium aurantiacum	35754	aliases:JNYJ01000030_GENE7590
13037.EHJ74411	KGM_205059	Danaus plexippus	13037	aliases:AGBW01003799,A0A212FAJ7_DANPL,A0A212FAJ7,DPL:KGM_205059,OWR50766,KGM_205059,UPI000239E1B6,NIF3 PROTEIN,EHJ74411,EHJ74411.1,KGM_22506,G6CWH0_DANPL,JH383172.1:CDS:COMPLEMENT(JOIN(12878..13062,13138..13334,13788..13964,14004..14135,14375..14502))
7955.ENSDARP00000066545	nif3l1	Danio rerio	7955	aliases:ENSDART00000152514,NIF3L1-002,NIF3L1-001,NP_001025139.1,NM_001029968,OTTDART00000027738,F1QAA0,ENSDART00000130693,UPI0000D8D556,ENSDARP00000126991,ENSDART00000066546,ENSDARP00000066545,DR.81203,OTTDART00000057406,ENSDARG00000045249,OTTDARP00000044991,CH211-136M16.4,NIF3 NGG1 INTERACTING FACTOR 3-LIKE 1 (S. CEREVISIAE),F1QAA0_DANRE,ZGC:110030,NIF3-LIKE PROTEIN 1,OTTDARP00000022708,DRE:5744…
6669.EFX87532	6669.EFX87532	Daphnia pulex	6669	aliases:PUTATIVE GTP CYCLOHYDROLASE 1 TYPE 2,PWY-6703,PWY-6983,NIF3-LIKE PROTEIN 1,PWY-6147,E9FYI0_DAPPU,PWY-5663,UPA00848,EFX87532,E9FYI0,PWY-7442,DAPPUDRAFT_43076,PWY-5664,DPX:DAPPUDRAFT_43076,EFX87532.1,E_GW1.5.441.1,UPI0001FE6CDA
1121374.KB891579_gene1772	1121374.KB891579_gene1772	Dasania marina	1121374	aliases:KB891579_GENE1772
9361.ENSDNOP00000032300	NIF3L1	Dasypus novemcinctus	9361	aliases:XM_004458926.1,XM_004458927.1,UPI000328EAB4,XM_004458925.1,ENSDNOP00000032300,MDS015,XM_004458928.1,XM_004458929.1,NIF3 NGG1 INTERACTING FACTOR 3-LIKE 1 (S. CEREVISIAE),XP_004458985,XP_004458984,XP_004458986,XP_004458983,XP_004458982,ENSDNOG00000042985,XM_004458926,XM_004458927,XP_004458982.1,XM_004458925,NIF3L1,XM_004458928,XM_004458929,XP_004458985.1,XP_004458984.1,CALS-7,XP_004458983.1…
4959.XP_458433.2	4959.XP_458433.2	Debaryomyces hansenii	4959	aliases:DHA:DEHA2C17116G,GI:294656183,DEHA2C17116P,Q6BTN6_DEBHA,294656183,UNIPROTKB/TREMBL:Q6BTN6,XM_458433.2,GENEID:2900364,Q6BTN6,XP_458433.2,INTERPRO:IPR002678,IPR002678,XP_458433,DEHA2C17116G,2900364
1304883.KI912532_gene1677	1304883.KI912532_gene1677	Dechloromonas agitata	1304883	aliases:KI912532_GENE1677
159087.Daro_3370	Daro_3370	Dechloromonas aromatica	159087	aliases:AAZ48099,Q47AN2,Q47AN2_DECAR,INTERPRO:IPR002678,AAZ48099.1,GI:71848603,DARO_3370,WP_011289095.1,PROTEIN OF UNKNOWN FUNCTION DUF34,DAR:DARO_3370,71848603,IPR002678
640081.Dsui_1427	Dsui_1427	Dechlorosoma suillum	640081	aliases:WP_014236523.1,DSU:DSUI_1427,DINUCLEAR METAL CENTER PROTEIN, YBGI/SA1388 FAMILY,DSUI_1427,AEV25822.1,INTERPRO:IPR002678,GI:359354651,G8QNH7_DECSP,G8QNH7,359354651,AEV25822,IPR002678
639282.DEFDS_1485	DEFDS_1485	Deferribacter desulfuricans	639282	aliases:DDF:DEFDS_1485,GTP CYCLOHYDROLASE 1 TYPE 2 HOMOLOG,DEFDS_1485,BAI80945,D3PEC2_DEFDS,290754568,GI:290754568,D3PEC2,BAI80945.1,WP_013008191.1
1125863.JAFN01000001_gene314	1125863.JAFN01000001_gene314	Deferrisoma camini	1125863	aliases:JAFN01000001_GENE314
1125863.JAFN01000001_gene2596	1125863.JAFN01000001_gene2596	Deferrisoma camini	1125863	aliases:JAFN01000001_GENE2596
1131462.DCF50_p2536	AFV06539.1	Dehalobacter sp.	1131462	aliases:GTP CYCLOHYDROLASE 1 TYPE 2 HOMOLOG,WP_015044569.1,409024509,AFV06539,AFV06539.1,K4L7V1,DEC:DCF50_P2536,K4L7V1_9FIRM,GI:409024509,DCF50_P2536
1121377.KB906404_gene2905	1121377.KB906404_gene2905	Deinococcus apachensis	1121377	aliases:KB906404_GENE2905
1121377.KB906414_gene417	1121377.KB906414_gene417	Deinococcus apachensis	1121377	aliases:KB906414_GENE417
1121378.KB899714_gene960	1121378.KB899714_gene960	Deinococcus aquatilis	1121378	aliases:KB899714_GENE960
546414.Deide_16520	ACO46624.2	Deinococcus deserti	546414	aliases:DEIDE_16520,C1CWQ7,ACO46624.2,C1CWQ7_DEIDV,ACO46624,GI:613465820,613465820,CONSERVED HYPOTHETICAL PROTEIN (UPF0135 PROTEIN),DDR:DEIDE_16520
1121380.JNIW01000035_gene1395	1121380.JNIW01000035_gene1395	Deinococcus frigens	1121380	aliases:JNIW01000035_GENE1395
1121380.JNIW01000018_gene3046	1121380.JNIW01000018_gene3046	Deinococcus frigens	1121380	aliases:JNIW01000018_GENE3046
319795.Dgeo_1982	Dgeo_1982	Deinococcus geothermalis	319795	aliases:ABF46276.1,DGE:DGEO_1982,INTERPRO:IPR002678,GI:94556362,ABF46276,Q1IWV8_DEIGD,DGEO_1982,Q1IWV8,NIF3 FAMILY PROTEIN, DUF34,94556362,IPR002678
745776.DGo_CA2636	DGo_CA2636	Deinococcus gobiensis	745776	aliases:380001373,AFD26563,AFD26563.1,H8GTS3,GI:380001373,DGO:DGO_CA2636,H8GTS3_DEIGI,NIF3 FAMILY PROTEIN, DUF34,DGO_CA2636
709986.Deima_2386	Deima_2386	Deinococcus maricopensis	709986	aliases:INTERPRO:NGG1P,319756267,NGG1P,DEIMA_2386,NGG1P INTERACTING FACTOR 3 PROTEIN, NIF3,ADV68024,DMR:DEIMA_2386,ADV68024.1,E8UAD5,WP_013557529.1,E8UAD5_DEIML,GI:319756267
709986.Deima_1711	Deima_1711	Deinococcus maricopensis	709986	aliases:INTERPRO:NGG1P,NGG1P,DMR:DEIMA_1711,E8U8H1,WP_013556865.1,ADV67360,E8U8H1_DEIML,ADV67360.1,DEIMA_1711,NGG1P INTERACTING FACTOR 3 PROTEIN, NIF3,319755603,GI:319755603
1121381.JNIV01000066_gene2484	1121381.JNIV01000066_gene2484	Deinococcus marmoris	1121381	aliases:BOO71_0001126,JNIV01000066_GENE2484,A0A1U7P479_9DEIO,WP_075830300.1,A0A1U7P479
1121381.JNIV01000058_gene2002	1121381.JNIV01000058_gene2002	Deinococcus marmoris	1121381	aliases:JNIV01000058_GENE2002
1121382.JQKG01000019_gene1298	1121382.JQKG01000019_gene1298	Deinococcus misasensis	1121382	aliases:JQKG01000019_GENE1298
937777.Deipe_0282	Deipe_0282	Deinococcus peraridilitoris	937777	aliases:WP_015234194.1,DINUCLEAR METAL CENTER PROTEIN, YBGI/SA1388 FAMILY,429128868,K9ZW65,DPD:DEIPE_0282,AFZ65883,AFZ65883.1,INTERPRO:IPR002678,DEIPE_0282,K9ZW65_DEIPD,GI:429128868,IPR002678
937777.Deipe_3503	Deipe_3503	Deinococcus peraridilitoris	937777	aliases:AFZ68936.1,429131921,L0A4Z7_DEIPD,L0A4Z7,INTERPRO:IPR002678,GI:429131921,AFZ68936,DPD:DEIPE_3503,DEIPE_3503,IPR002678
1476583.DEIPH_ctg032orf0100	EYB67850.1	Deinococcus phoenicis	1476583	aliases:EYB67850.1,597707609,DEIPH_CTG032ORF0100,A0A016QNW8_9DEIO,WP_034357741.1,GI:597707609,EYB67850,A0A016QNW8
926554.KI912635_gene2976	926554.KI912635_gene2976	Deinococcus pimensis	926554	aliases:KI912635_GENE2976
926554.KI912635_gene2973	926554.KI912635_gene2973	Deinococcus pimensis	926554	aliases:KI912635_GENE2973
926554.KI912646_gene2357	926554.KI912646_gene2357	Deinococcus pimensis	926554	aliases:KI912646_GENE2357
693977.Deipr_1688	Deipr_1688	Deinococcus proteolyticus	693977	aliases:ADY26822,F0RKW0,F0RKW0_DEIPM,INTERPRO:IPR002678,WP_013615430.1,DPT:DEIPR_1688,GI:324315707,NGG1P INTERACTING FACTOR 3 PROTEIN, NIF3,DEIPR_1688,ADY26822.1,IPR002678,324315707
693977.Deipr_1101	Deipr_1101	Deinococcus proteolyticus	693977	aliases:DPT:DEIPR_1101,324315138,ADY26253,INTERPRO:IPR002678,F0RNB1,NGG1P INTERACTING FACTOR 3 PROTEIN, NIF3,DEIPR_1101,ADY26253.1,GI:324315138,F0RNB1_DEIPM,IPR002678
243230.DR_2466	DR_2466	Deinococcus radiodurans	243230	aliases:AAF12010,GI:6460287,DRA:DR_2466,1797760,WP_010889091.1,DR_2466,NP_296186,NP_296186.1,Q9RRM2,AAF12010.1,Q9RRM2_DEIRA,6460287
243230.DR_0110	DR_0110	Deinococcus radiodurans	243230	aliases:AAF09697.1,GTP CYCLOHYDROLASE 1 TYPE 2 HOMOLOG,NP_293836.1,AAF09697,1798833,6457771,DR_0110,GI:6457771,GCH1L_DEIRA,NP_293836,Q9RY41,DRA:DR_0110
1540221.JQNI01000002_gene2709	1540221.JQNI01000002_gene2709	Deinococcus sp.	1540221	aliases:JQNI01000002_GENE2709
684949.ATTJ01000001_gene3069	684949.ATTJ01000001_gene3069	Deinococcus sp.	684949	aliases:ATTJ01000001_GENE3069
1489678.RDMS_11835	RDMS_11835	Deinococcus sp.	1489678	aliases:RDMS_11835,NGG1P INTERACTING FACTOR 3 PROTEIN, NIF3,656340508,GI:656340508,A0A072N7M1_9DEIO,KEF33506.1,WP_052016828.1,A0A072N7M1,KEF33506
1489678.RDMS_12010	RDMS_12010	Deinococcus sp.	1489678	aliases:656340542,WP_034406586.1,A0A072NK56,A0A072NK56_9DEIO,RDMS_12010,KEF33540.1,KEF33540,GI:656340542
1288484.APCS01000079_gene2105	1288484.APCS01000079_gene2105	Deinococcus wulumuqiensis	1288484	aliases:APCS01000079_GENE2105
398578.Daci_5506	Daci_5506	Delftia acidovorans	398578	aliases:DACI_5506,WP_012207304.1,GI:160366522,ABX38135,ABX38135.1,A9BX59_DELAS,24117387,INTERPRO:IPR002678,160366522,IPR002678,A9BX59,PROTEIN OF UNKNOWN FUNCTION DUF34,DAC:DACI_5506
1121385.AQXW01000002_gene121	1121385.AQXW01000002_gene121	Demetria terragena	1121385	aliases:AQXW01000002_GENE121
522772.Dacet_1752	Dacet_1752	Denitrovibrio acetiphilus	522772	aliases:DACET_1752,GTP CYCLOHYDROLASE 1 TYPE 2 HOMOLOG,D4H0K3,DAP:DACET_1752,ADD68516.1,INTERPRO:IPR002678,PROTEIN OF UNKNOWN FUNCTION DUF34,WP_013011027.1,290884816,GI:290884816,D4H0K3_DENA2,ADD68516,IPR002678
1203568.HMPREF1484_01607	EPH14307.1	Dermabacter sp.	1203568	aliases:WP_016664505.1,GI:514219037,514219037,HMPREF1484_01607,YBGI/FAMILY DINUCLEAR METAL CENTER PROTEIN,S3XXP5,S3XXP5_9MICO,EPH14307,EPH14307.1
1274.HX89_08935	HX89_08935	Dermacoccus nishinomiyaensis	1274	aliases:DNI:HX89_08935,HX89_08935,WP_038571100.1,AIF41048,AIF41048.1,A0A075JLY4,664688458,A0A075JLY4_9MICO,GI:664688458
188626.HMPREF0321_1632	EFP58766.1	Dermacoccus sp.	188626	aliases:GI:308434932,EFP58766,E3B7Z7_9MICO,EFP58766.1,DINUCLEAR METAL CENTER PROTEIN, YBGI FAMILY,WP_006944158.1,HMPREF0321_1632,308434932,E3B7Z7
997346.HMPREF9374_1313	EGK12719.1	Desmospora sp.	997346	aliases:F5SDY2_9BACL,GTP CYCLOHYDROLASE 1 TYPE 2 HOMOLOG,F5SDY2,GI:332975841,EGK12719.1,PROTEIN OF HYPOTHETICAL FUNCTION DUF34,EGK12719,HMPREF9374_1313,332975841,WP_009709381.1
997346.HMPREF9374_0563	EGK13863.1	Desmospora sp.	997346	aliases:F5SBT2_9BACL,332977056,EGK13863,HMPREF9374_0563,F5SBT2,WP_009708631.1,EGK13863.1,GI:332977056
644282.Deba_1409	Deba_1409	Desulfarculus baarsii	644282	aliases:E1QGT4,ADK84777,DBR:DEBA_1409,E1QGT4_DESB2,DEBA_1409,GTP CYCLOHYDROLASE 1 TYPE 2 HOMOLOG,ADK84777.1,PROTEIN OF UNKNOWN FUNCTION DUF34,GI:301639455,301639455
439235.Dalk_3075	Dalk_3075	Desulfatibacillum alkenivorans	439235	aliases:INTERPRO:NGG1P,NGG1P,DAL:DALK_3075,B8FBL2_DESAA,ACL04765,ACL04765.1,GI:218762299,PROTEIN OF UNKNOWN FUNCTION DUF34,DALK_3075,WP_015947825.1,218762299,B8FBL2
756499.Desde_3573	Desde_3573	Desulfitobacterium dehalogenans	756499	aliases:DDH:DESDE_3573,GTP CYCLOHYDROLASE 1 TYPE 2 HOMOLOG,DINUCLEAR METAL CENTER PROTEIN, YBGI/SA1388 FAMILY,INTERPRO:IPR017221,INTERPRO:IPR002678,DESDE_3573,I4AD16_DESDJ,GI:390526120,I4AD16,WP_014795324.1,390526120,IPR017221,AFM01851,AFM01851.1,IPR002678
871963.Desdi_2927	Desdi_2927	Desulfitobacterium dichloroeliminans	871963	aliases:DINUCLEAR METAL CENTER PROTEIN, YBGI/SA1388 FAMILY,DESDI_2927,INTERPRO:IPR002678,DDL:DESDI_2927,AGA70338,AGA70338.1,L0FBK9_DESDL,L0FBK9,WP_015263299.1,GI:430785055,430785055,IPR002678
138119.DSY3045	DSY3045	Desulfitobacterium hafniense	138119	aliases:Q24T08_DESHY,89335239,GI:89335239,BAE84834,DSY3045,WP_011460810.1,GTP CYCLOHYDROLASE 1 TYPE 2 HOMOLOG,Q24T08,BAE84834.1,DSY:DSY3045
871968.DESME_12920	AHF07826.1	Desulfitobacterium metallireducens	871968	aliases:AHF07826.1,W0EFI3_9FIRM,W0EFI3,WP_006715929.1,DESME_12920,NGG1P INTERACTING FACTOR 3 PROTEIN, NIF3,GI:570736795,DMT:DESME_12920,AHF07826,570736795
880072.Desac_2866	Desac_2866	Desulfobacca acetoxidans	880072	aliases:GI:328454837,GTP CYCLOHYDROLASE 1 TYPE 2 HOMOLOG,INTERPRO:IPR017221,F2NIX2,INTERPRO:IPR002678,AEB10666.1,328454837,NGG1P INTERACTING FACTOR 3 PROTEIN, NIF3,DESAC_2866,F2NIX2_DESAR,IPR017221,DAO:DESAC_2866,AEB10666,IPR002678
1121396.KB893059_gene2811	1121396.KB893059_gene2811	Desulfobacter curvatus	1121396	aliases:KB893059_GENE2811
879212.DespoDRAFT_03262	EIM65041.1	Desulfobacter postgatei	879212	aliases:389402819,DINUCLEAR METAL CENTER PROTEIN, YBGI/SA1388 FAMILY,I5B6C8,WP_004074822.1,GI:389402819,EIM65041,INTERPRO:IPR002678,DESPODRAFT_03262,EIM65041.1,I5B6C8_9DELT,IPR002678
177437.HRM2_29360	HRM2_29360	Desulfobacterium autotrophicum	177437	aliases:223692741,DAT:HRM2_29360,HRM2_29360,GI:223692741,ACN16024,C0QJZ8_DESAH,ACN16024.1,WP_015904786.1,C0QJZ8
1232437.KL661986_gene3638	1232437.KL661986_gene3638	Desulfobacula sp.	1232437	aliases:KL661986_GENE3638
1121403.AUCV01000032_gene2885	1121403.AUCV01000032_gene2885	Desulfobulbus japonicus	1121403	aliases:AUCV01000032_GENE2885
1167006.UWK_01249	UWK_01249	Desulfocapsa sulfexigens	1167006	aliases:UWK_01249,DINUCLEAR METAL CENTER PROTEIN, YBGI/SA1388 FAMILY,GI:451906219,DSF:UWK_01249,M1P2U8_DESSD,AGF77813,AGF77813.1,451906219,M1P2U8
1121405.dsmv_1017	dsmv_1017	Desulfococcus multivorans	1121405	aliases:EPR44981.1,S7U630,AOY59173,DML:DMUL_24010,EPR44981,INTERPRO:IPR002678,DSMV_1017,NGG1P INTERACTING FACTOR 3 PROTEIN, NIF3,523473248,S7U630_DESML,GI:523473248,IPR002678
96561.Dole_2150	Dole_2150	Desulfococcus oleovorans	96561	aliases:ABW67954.1,DOLE_2150,DOL:DOLE_2150,ABW67954,158510987,A8ZUC2,PROTEIN OF UNKNOWN FUNCTION DUF34,INTERPRO:IPR002678,GTP CYCLOHYDROLASE 1 TYPE 2 HOMOLOG,A8ZUC2_DESOH,GI:158510987,IPR002678
1121406.JAEX01000002_gene1166	1121406.JAEX01000002_gene1166	Desulfocurvus vexinensis	1121406	aliases:JAEX01000002_GENE1166
485915.Dret_0541	Dret_0541	Desulfohalobium retbaense	485915	aliases:ACV67838.1,GTP CYCLOHYDROLASE 1 TYPE 2 HOMOLOG,DRT:DRET_0541,PROTEIN OF UNKNOWN FUNCTION DUF34,257796901,C8WYS2_DESRD,C8WYS2,INTERPRO:IPR002678,ACV67838,GI:257796901,WP_015750996.1,DRET_0541,IPR002678
525897.Dbac_1948	Dbac_1948	Desulfomicrobium baculatum	525897	aliases:GI:256578900,DBAC_1948,C7LXG5_DESBD,C7LXG5,INTERPRO:IPR002678,PROTEIN OF UNKNOWN FUNCTION DUF34,ACU90036,WP_015774127.1,DBA:DBAC_1948,ACU90036.1,IPR002678,256578900
706587.Desti_4601	Desti_4601	Desulfomonile tiedjei	706587	aliases:DINUCLEAR METAL CENTER PROTEIN, YBGI/SA1388 FAMILY,INTERPRO:IPR002678,I4CCD6,390626020,GI:390626020,I4CCD6_DESTA,DTI:DESTI_4601,DESTI_4601,IPR002678,AFM27227,AFM27227.1
555779.Dthio_PD3299	EFI35860.1	Desulfonatronospira thiodismutans	555779	aliases:D6SME9_9DELT,GTP CYCLOHYDROLASE 1 TYPE 2 HOMOLOG,EFI35860,EFI35860.1,298511958,INTERPRO:IPR002678,WP_008868989.1,DTHIO_PD3299,PROTEIN OF UNKNOWN FUNCTION DUF34,GI:298511958,D6SME9,IPR002678
1121413.JMKT01000009_gene1804	1121413.JMKT01000009_gene1804	Desulfonatronovibrio hydrogenovorans	1121413	aliases:JMKT01000009_GENE1804
1379281.AVAG01000003_gene183	1379281.AVAG01000003_gene183	Desulfonauticus sp.	1379281	aliases:AVAG01000003_GENE183
1304885.AUEY01000031_gene43	1304885.AUEY01000031_gene43	Desulforegula conservatrix	1304885	aliases:AUEY01000031_GENE43
933262.AXAM01000023_gene649	933262.AXAM01000023_gene649	Desulfosarcina sp.	933262	aliases:AXAM01000023_GENE649
1265505.ATUG01000003_gene87	1265505.ATUG01000003_gene87	Desulfospira joergensenii	1265505	aliases:ATUG01000003_GENE87
646529.Desaci_3870	AFM42750.1	Desulfosporosinus acidiphilus	646529	aliases:DINUCLEAR METAL CENTER PROTEIN, YBGI/SA1388 FAMILY,IPR002678,INTERPRO:IPR002678,WP_014828737.1,DAI:DESACI_3870,AFM42750,AFM42750.1,I4DAC6,GI:391357051,I4DAC6_DESAJ,DESACI_3870,391357051
768704.Desmer_3950	AFQ45785.1	Desulfosporosinus meridiei	768704	aliases:J7IVP5,DINUCLEAR METAL CENTER PROTEIN, YBGI/SA1388 FAMILY,GI:402255510,J7IVP5_DESMD,INTERPRO:IPR002678,AFQ45785.1,AFQ45785,DESMER_3950,WP_014904694.1,402255510,DMI:DESMER_3950,IPR002678
768706.Desor_4930	Desor_4930	Desulfosporosinus orientis	768706	aliases:G7WJ18,DINUCLEAR METAL CENTER PROTEIN, YBGI/SA1388 FAMILY,G7WJ18_DESOD,AET70330.1,GI:357215712,DOR:DESOR_4930,357215712,AET70330,WP_014187136.1,INTERPRO:IPR002678,DESOR_4930,IPR002678
913865.DOT_0909	DOT_0909	Desulfosporosinus sp.	913865	aliases:G2FMI5_9FIRM,GI:344329835,344329835,DOT_0909,G2FMI5,EGW41160.1,EGW41160,WP_009614426.1,NIF3 FAMILY PROTEIN
913865.DOT_1834	DOT_1834	Desulfosporosinus sp.	913865	aliases:GI:344328828,EGW40193.1,EGW40193,DOT_1834,344328828,G2FQ31_9FIRM,G2FQ31
1487923.DP73_21140	DP73_21140	Desulfosporosinus sp.	1487923	aliases:DINUCLEAR METAL CENTER PROTEIN,GI:695875759,WP_034602358.1,KGK81776.1,695875759,KGK81776,A0A099RPR5_9FIRM,A0A099RPR5,DP73_21140
768710.DesyoDRAFT_4700	EHQ91652.1	Desulfosporosinus youngiae	768710	aliases:GI:374419217,H5XYU6_9FIRM,DINUCLEAR METAL CENTER PROTEIN, YBGI/SA1388 FAMILY,INTERPRO:IPR002678,EHQ91652.1,374419217,EHQ91652,WP_007786672.1,DESYODRAFT_4700,H5XYU6,IPR002678
177439.DP0634	DP0634	Desulfotalea psychrophila	177439	aliases:Q6AQL0,UNIPROTKB/TREMBL:Q6AQL0,DP0634,INTERPRO:IPR002678,CAG35363.1,Q6AQL0_DESPS,CAG35363,GI:50875523,WP_011187879.1,50875523,DPS:DP0634,IPR002678
485916.Dtox_3034	Dtox_3034	Desulfotomaculum acetoxidans	485916	aliases:GTP CYCLOHYDROLASE 1 TYPE 2 HOMOLOG,GI:257779892,257779892,DTOX_3034,ACV63786.1,C8W3K0_DESAS,PROTEIN OF UNKNOWN FUNCTION DUF34,C8W3K0,INTERPRO:IPR002678,ACV63786,DAE:DTOX_3034,WP_015758478.1,IPR002678
485916.Dtox_2392	Dtox_2392	Desulfotomaculum acetoxidans	485916	aliases:DAE:DTOX_2392,257779309,GI:257779309,ACV63203.1,C8W0E8,DTOX_2392,WP_015757904.1,ACV63203,C8W0E8_DESAS
1121422.AUMW01000040_gene2843	1121422.AUMW01000040_gene2843	Desulfotomaculum alcoholivorax	1121422	aliases:AUMW01000040_GENE2843
1121422.AUMW01000030_gene75	1121422.AUMW01000030_gene75	Desulfotomaculum alcoholivorax	1121422	aliases:AUMW01000030_GENE75
1121423.JONT01000013_gene303	1121423.JONT01000013_gene303	Desulfotomaculum alkaliphilum	1121423	aliases:JONT01000013_GENE303
1121423.JONT01000001_gene2028	1121423.JONT01000001_gene2028	Desulfotomaculum alkaliphilum	1121423	aliases:JONT01000001_GENE2028
868595.Desca_1850	Desca_1850	Desulfotomaculum carboxydivorans	868595	aliases:F6B8D0,AEF94694.1,WP_013810411.1,GTP CYCLOHYDROLASE 1 TYPE 2 HOMOLOG,DESCA_1850,333749587,INTERPRO:IPR002678,NGG1P INTERACTING FACTOR 3 PROTEIN, NIF3,DCA:DESCA_1850,GI:333749587,AEF94694,F6B8D0_DESCC,IPR002678
868595.Desca_1211	Desca_1211	Desulfotomaculum carboxydivorans	868595	aliases:GI:333748965,WP_013810064.1,AEF94072,333748965,F6B417_DESCC,F6B417,DESCA_1211,AEF94072.1,DCA:DESCA_1211
767817.Desgi_1406	Desgi_1406	Desulfotomaculum gibsoniae	767817	aliases:R4KK33,GTP CYCLOHYDROLASE 1 TYPE 2 HOMOLOG,DINUCLEAR METAL CENTER PROTEIN, YBGI/SA1388 FAMILY,INTERPRO:IPR017221,GI:488455011,INTERPRO:IPR002678,AGL00905,DESGI_1406,488455011,DGI:DESGI_1406,IPR017221,WP_006522693.1,AGL00905.1,R4KK33_9FIRM,IPR002678
767817.Desgi_1701	Desgi_1701	Desulfotomaculum gibsoniae	767817	aliases:GI:488455277,R4KNG5_9FIRM,R4KNG5,INTERPRO:IPR002678,488455277,AGL01171.1,WP_006522383.1,AGL01171,DESGI_1701,DGI:DESGI_1701,IPR002678
1121428.DESHY_60292___1	1121428.DESHY_60292___1	Desulfotomaculum hydrothermale	1121428	aliases:K8E0R3,GTP CYCLOHYDROLASE 1 TYPE 2 HOMOLOG,K8E0R3_9FIRM,DESHY_60292___1,WP_008412945.1,DESHY_60292
1121428.DESHY_110203___1	1121428.DESHY_110203___1	Desulfotomaculum hydrothermale	1121428	aliases:K8DXF7_9FIRM,WP_008410081.1,K8DXF7,DESHY_110203,DESHY_110203___1
760568.Desku_0655	Desku_0655	Desulfotomaculum kuznetsovii	760568	aliases:DESKU_0655,GI:333821601,F6CQI7,AEG14264.1,DKU:DESKU_0655,AEG14264,333821601,F6CQI7_DESK7
760568.Desku_2597	Desku_2597	Desulfotomaculum kuznetsovii	760568	aliases:DKU:DESKU_2597,GTP CYCLOHYDROLASE 1 TYPE 2 HOMOLOG,GI:333823459,INTERPRO:IPR002678,F6CHG2,333823459,NGG1P INTERACTING FACTOR 3 PROTEIN, NIF3,AEG16122,AEG16122.1,DESKU_2597,F6CHG2_DESK7,IPR002678
696369.KI912183_gene125	696369.KI912183_gene125	Desulfotomaculum nigrificans	696369	aliases:KI912183_GENE125
696369.KI912183_gene752	696369.KI912183_gene752	Desulfotomaculum nigrificans	696369	aliases:KI912183_GENE752
349161.Dred_2459	Dred_2459	Desulfotomaculum reducens	349161	aliases:ABO50969,WP_011878767.1,A4J7B6_DESRM,INTERPRO:IPR002678,DRM:DRED_2459,GI:134052998,A4J7B6,ABO50969.1,PROTEIN OF UNKNOWN FUNCTION DUF34,134052998,DRED_2459,GTP CYCLOHYDROLASE 1 TYPE 2 HOMOLOG,IPR002678
349161.Dred_1636	Dred_1636	Desulfotomaculum reducens	349161	aliases:A4J511_DESRM,GI:134052193,WP_011877979.1,ABO50164,134052193,DRM:DRED_1636,ABO50164.1,A4J511,DRED_1636
696281.Desru_1182	Desru_1182	Desulfotomaculum ruminis	696281	aliases:334091117,DESRU_1182,GTP CYCLOHYDROLASE 1 TYPE 2 HOMOLOG,INTERPRO:IPR017221,AEG59457.1,INTERPRO:IPR002678,IPR002678,WP_013841228.1,F6DMZ9,IPR017221,F6DMZ9_DESRL,PROTEIN OF UNKNOWN FUNCTION DUF34,GI:334091117,AEG59457,DRU:DESRU_1182
696281.Desru_2462	Desru_2462	Desulfotomaculum ruminis	696281	aliases:GI:334092355,AEG60695,DESRU_2462,F6DNX6_DESRL,334092355,WP_013842451.1,DRU:DESRU_2462,AEG60695.1,F6DNX6
696281.Desru_3253	Desru_3253	Desulfotomaculum ruminis	696281	aliases:DRU:DESRU_3253,334093119,IPR002678,AEG61459.1,F6DVJ9_DESRL,PROTEIN OF UNKNOWN FUNCTION DUF34,WP_013843205.1,AEG61459,DESRU_3253,INTERPRO:IPR002678,GI:334093119,F6DVJ9
1121430.JMLG01000001_gene2199	1121430.JMLG01000001_gene2199	Desulfotomaculum thermocisternum	1121430	aliases:JMLG01000001_GENE2199
1121430.JMLG01000012_gene1979	1121430.JMLG01000012_gene1979	Desulfotomaculum thermocisternum	1121430	aliases:JMLG01000012_GENE1979
1121434.AULY01000006_gene460	1121434.AULY01000006_gene460	Desulfovibrio acrylicus	1121434	aliases:AULY01000006_GENE460
643562.Daes_0312	Daes_0312	Desulfovibrio aespoeensis	643562	aliases:DAS:DAES_0312,ADU61338.1,316942287,WP_013513275.1,INTERPRO:IPR002678,PROTEIN OF UNKNOWN FUNCTION DUF34,E6VWD2_PSEA9,DAES_0312,GTP CYCLOHYDROLASE 1 TYPE 2 HOMOLOG,ADU61338,E6VWD2,GI:316942287,IPR002678
690850.Desaf_2489	Desaf_2489	Desulfovibrio africanus	690850	aliases:EGJ50812,EGJ50812.1,INTERPRO:IPR002678,F3YZ56,GI:332553768,NGG1P INTERACTING FACTOR 3 PROTEIN, NIF3,332553768,DESAF_2489,GTP CYCLOHYDROLASE 1 TYPE 2 HOMOLOG,WP_014260510.1,F3YZ56_DESAF,DAF:DESAF_2489,IPR002678
207559.Dde_1729	Dde_1729	Desulfovibrio alaskensis	207559	aliases:ABB38526,78219177,GTP CYCLOHYDROLASE 1 TYPE 2 HOMOLOG,ABB38526.1,Q310X0,INTERPRO:IPR002678,GI:78219177,Q310X0_DESAG,NGG1P INTERACTING FACTOR 3 PROTEIN, NIF3,DDE_1729,WP_011367667.1,DDE:DDE_1729,IPR002678
1121438.JNJA01000004_gene591	1121438.JNJA01000004_gene591	Desulfovibrio alcoholivorans	1121438	aliases:JNJA01000004_GENE591
1121439.dsat_2260	dsat_2260	Desulfovibrio alkalitolerans	1121439	aliases:GI:523462944,523462944,INTERPRO:IPR002678,NGG1P INTERACTING FACTOR 3 PROTEIN, NIF3,S7TCF6_9DELT,EPR34897,WP_020886146.1,S7TCF6,DSAT_2260,EPR34897.1,IPR002678
1121440.AUMA01000001_gene93	1121440.AUMA01000001_gene93	Desulfovibrio aminophilus	1121440	aliases:AUMA01000001_GENE93
1121441.AUCX01000006_gene834	1121441.AUCX01000006_gene834	Desulfovibrio bastinii	1121441	aliases:AUCX01000006_GENE834
1304872.JAGC01000009_gene1505	1304872.JAGC01000009_gene1505	Desulfovibrio cf.	1304872	aliases:JAGC01000009_GENE1505
641491.DND132_2745	EGB15948.1	Desulfovibrio desulfuricans	641491	aliases:DND132_2745,323460083,GTP CYCLOHYDROLASE 1 TYPE 2 HOMOLOG,F0JJ49,INTERPRO:IPR002678,IPR002678,EGB15948.1,EGB15948,PROTEIN OF UNKNOWN FUNCTION DUF34,F0JJ49_DESDE,DDN:DND132_2745,GI:323460083
525146.Ddes_1250	Ddes_1250	Desulfovibrio desulfuricans	525146	aliases:WP_012624878.1,INTERPRO:IPR002678,B8J076_DESDA,ACL49153.1,219868818,B8J076,PROTEIN OF UNKNOWN FUNCTION DUF34,DDES_1250,ACL49153,GI:219868818,DDS:DDES_1250,IPR002678
1121445.ATUZ01000003_gene48	1121445.ATUZ01000003_gene48	Desulfovibrio desulfuricans	1121445	aliases:ATUZ01000003_GENE48
1121447.JONL01000008_gene3629	1121447.JONL01000008_gene3629	Desulfovibrio frigidus	1121447	aliases:JONL01000008_GENE3629
596151.DesfrDRAFT_1947	EFL51245.1	Desulfovibrio fructosivorans	596151	aliases:E1JWE8_DESFR,DESFRDRAFT_1947,GTP CYCLOHYDROLASE 1 TYPE 2 HOMOLOG,302491357,EFL51245,INTERPRO:IPR002678,GI:302491357,E1JWE8,EFL51245.1,WP_005993375.1,PROTEIN OF UNKNOWN FUNCTION DUF34,IPR002678
1121448.DGI_2783	DGI_2783	Desulfovibrio gigas	1121448	aliases:DGI_2783,WP_021761538.1,AGW14512,AGW14512.1,T2GF08,T2GF08_DESGI,DGG:DGI_2783,544200012,GI:544200012
1121451.DESAM_20377	CCO22664.1	Desulfovibrio hydrothermalis	1121451	aliases:CONSERVED PROTEIN OF UNKNOWN FUNCTION,CCO22664.1,GI:432169296,L0R7F0,WP_015335272.1,432169296,CCO22664,DHY:DESAM_20377,DESAM_20377,L0R7F0_9DELT
1121456.ATVA01000018_gene385	1121456.ATVA01000018_gene385	Desulfovibrio longus	1121456	aliases:ATVA01000018_GENE385
573370.DMR_17790	DMR_17790	Desulfovibrio magneticus	573370	aliases:GTP CYCLOHYDROLASE 1 TYPE 2 HOMOLOG,DMR_17790,WP_015860469.1,BAH75270,GI:239796281,C4XQA5,BAH75270.1,C4XQA5_DESMR,DMA:DMR_17790,239796281
1121459.AQXE01000005_gene1523	1121459.AQXE01000005_gene1523	Desulfovibrio oxyclinae	1121459	aliases:AQXE01000005_GENE1523
1322246.BN4_11830	BN4_11830	Desulfovibrio piezophilus	1322246	aliases:CONSERVED PROTEIN OF UNKNOWN FUNCTION,CCH49065,GTP CYCLOHYDROLASE 1 TYPE 2 HOMOLOG,DPI:BN4_11830,WP_015415109.1,CCH49065.1,M1WM65_PSEP2,BN4_11830,GI:451896186,451896186,M1WM65
411464.DESPIG_00585	EEB34485.1	Desulfovibrio piger	411464	aliases:212674002,GI:212674002,EEB34485.1,DESPIG_00585,INTERPRO:IPR002678,EEB34485,SFV72179,WP_006004560.1,DINUCLEAR METAL CENTER PROTEIN, YBGI FAMILY,B6WR98_9DELT,DPG:DESPIGER_0286,B6WR98,IPR002678
526222.Desal_3360	Desal_3360	Desulfovibrio salexigens	526222	aliases:DESAL_3360,C6BS27_DESAD,ACS81410.1,INTERPRO:IPR002678,WP_015853226.1,GI:242123714,PROTEIN OF UNKNOWN FUNCTION DUF34,C6BS27,IPR002678,ACS81410,DSA:DESAL_3360,242123714
941449.dsx2_0905	dsx2_0905	Desulfovibrio sp.	941449	aliases:EPR37559.1,DSX2_0905,523465641,INTERPRO:IPR002678,S7UU23,NGG1P INTERACTING FACTOR 3 PROTEIN, NIF3,S7UU23_9DELT,EPR37559,GI:523465641,WP_020881931.1,IPR002678
665942.HMPREF1022_00395	EGW52627.1	Desulfovibrio sp.	665942	aliases:HMPREF1022_00395,WP_009301637.1,GI:345048805,G1UP72,G1UP72_9DELT,EGW52627,EGW52627.1,345048805
1307759.JOMJ01000004_gene2911	1307759.JOMJ01000004_gene2911	Desulfovibrio sp.	1307759	aliases:JOMJ01000004_GENE2911
644968.DFW101_0581	EHJ46598.1	Desulfovibrio sp.	644968	aliases:DFW101_0581,GTP CYCLOHYDROLASE 1 TYPE 2 HOMOLOG,GI:357581265,EHJ46598.1,INTERPRO:IPR002678,NGG1P INTERACTING FACTOR 3 PROTEIN, NIF3,G7QDU2,G7QDU2_9DELT,IPR002678,EHJ46598,WP_009180034.1,357581265
596152.DesU5LDRAFT_1653	EIG53334.1	Desulfovibrio sp.	596152	aliases:GTP CYCLOHYDROLASE 1 TYPE 2 HOMOLOG,GI:385733136,I2Q0M8,INTERPRO:IPR002678,EIG53334,385733136,EIG53334.1,DESU5LDRAFT_1653,I2Q0M8_9DELT,WP_009108161.1,IPR002678
457398.HMPREF0326_01554	EFL85851.1	Desulfovibrio sp.	457398	aliases:GI:302862919,HMPREF0326_01554,EFL85851,EFL85851.1,302862919,YBGI/FAMILY DINUCLEAR METAL CENTER PROTEIN
882.DVU_1456	DVU_1456	Desulfovibrio vulgaris	882	aliases:YP_010675,DVU:DVU1456,2794823,GI:46449283,Q72C28_DESVH,NIF3 FAMILY PROTEIN,AAS95934.1,DVU_1456,GTP CYCLOHYDROLASE 1 TYPE 2 HOMOLOG,Q72C28,WP_010938749.1,AAS95934,46449283,YP_010675.1
883.DvMF_0259	DvMF_0259	Desulfovibrio vulgaris	883	aliases:GTP CYCLOHYDROLASE 1 TYPE 2 HOMOLOG,ACL07216,DVM:DVMF_0259,B8DPC9,INTERPRO:IPR002678,PROTEIN OF UNKNOWN FUNCTION DUF34,GI:218756317,DVMF_0259,B8DPC9_DESVM,218756317,ACL07216.1,WP_012611410.1,IPR002678
1121468.AUBR01000015_gene2250	1121468.AUBR01000015_gene2250	Desulfovirgula thermocuniculi	1121468	aliases:AUBR01000015_GENE2250
1121468.AUBR01000066_gene908	1121468.AUBR01000066_gene908	Desulfovirgula thermocuniculi	1121468	aliases:AUBR01000066_GENE908
694431.DESACE_05155	AHF97956.1	Desulfurella acetivorans	694431	aliases:AHF97956,AHF97956.1,GI:573479544,3.5.4.16,DAV:DESACE_05155,W0JKY6_DESAE,W0JKY6,DESACE_05155,EC 3.5.4.16,573479544
653733.Selin_0025	Selin_0025	Desulfurispirillum indicum	653733	aliases:E6W4Q6,SELIN_0025,ADU64784,WP_013504673.1,PROTEIN OF UNKNOWN FUNCTION DUF34,316945308,GI:316945308,DIN:SELIN_0025,GTP CYCLOHYDROLASE 1 TYPE 2 HOMOLOG,INTERPRO:IPR002678,ADU64784.1,E6W4Q6_DESIS,IPR002678
1121472.AQWN01000001_gene186	1121472.AQWN01000001_gene186	Desulfurispora thermophila	1121472	aliases:AQWN01000001_GENE186
1121472.AQWN01000010_gene544	1121472.AQWN01000010_gene544	Desulfurispora thermophila	1121472	aliases:AQWN01000010_GENE544
589865.DaAHT2_0015	ADH84732.1	Desulfurivibrio alkaliphilus	589865	aliases:296923922,D6Z575_DESAT,INTERPRO:IPR002678,ADH84732.1,PROTEIN OF UNKNOWN FUNCTION DUF34,ADH84732,DAK:DAAHT2_0015,DAAHT2_0015,D6Z575,GI:296923922,WP_013162263.1,IPR002678
1158318.ATXC01000001_gene752	1158318.ATXC01000001_gene752	Desulfurobacterium sp.	1158318	aliases:ATXC01000001_GENE752
1158318.ATXC01000001_gene996	1158318.ATXC01000001_gene996	Desulfurobacterium sp.	1158318	aliases:ATXC01000001_GENE996
868864.Dester_1508	ADY74135.1	Desulfurobacterium thermolithotrophum	868864	aliases:WP_013639082.1,ADY74135,ADY74135.1,F0S2C0_DESTD,325066128,NGG1P INTERACTING FACTOR 3 PROTEIN, NIF3,DESTER_1508,F0S2C0,GI:325066128,DTE:DESTER_1508
868864.Dester_1420	ADY74051.1	Desulfurobacterium thermolithotrophum	868864	aliases:F0S1X0,DESTER_1420,ADY74051,NGG1P INTERACTING FACTOR 3 PROTEIN, NIF3,325066044,WP_013639000.1,GI:325066044,DTE:DESTER_1420,F0S1X0_DESTD,ADY74051.1
1232410.KI421412_gene96	1232410.KI421412_gene96	Desulfuromonas sp.	1232410	aliases:KI421412_GENE96
1232410.KI421412_gene94	1232410.KI421412_gene94	Desulfuromonas sp.	1232410	aliases:KI421412_GENE94
555088.DealDRAFT_0015	EEG78741.1	Dethiobacter alkaliphilus	555088	aliases:225169946,GTP CYCLOHYDROLASE 1 TYPE 2 HOMOLOG,IPR002678,DEALDRAFT_0015,INTERPRO:IPR002678,C0GC06_9FIRM,WP_008513695.1,GI:225169946,PROTEIN OF UNKNOWN FUNCTION DUF34,C0GC06,EEG78741,EEG78741.1
469381.Dpep_2344	Dpep_2344	Dethiosulfovibrio peptidovorans	469381	aliases:D2Z4M2_9BACT,D2Z4M2,INTERPRO:IPR002678,DPEP_2344,EFC92366,GI:288570809,288570809,PROTEIN OF UNKNOWN FUNCTION DUF34,EFC92366.1,IPR002678
592028.GCWU000321_00052	EEW96116.1	Dialister invisus	592028	aliases:WP_007069049.1,GTP CYCLOHYDROLASE 1 TYPE 2 HOMOLOG,C9LLN3_9FIRM,C9LLN3,EEW96116,INTERPRO:IPR002678,EEW96116.1,DINUCLEAR METAL CENTER PROTEIN, YBGI FAMILY,GI:260402569,260402569,GCWU000321_00052,IPR002678
888062.HMPREF9083_0229	EGF16753.1	Dialister micraerophilus	888062	aliases:F2BVL2,327471299,NIF3 FAMILY PROTEIN,GI:327471299,F2BVL2_9FIRM,EGF16753,GTP CYCLOHYDROLASE 1 TYPE 2 HOMOLOG,WP_007555535.1,EGF16753.1,HMPREF9083_0229
910314.HMPREF9220_1161	EFR42902.1	Dialister microaerophilus	910314	aliases:GTP CYCLOHYDROLASE 1 TYPE 2 HOMOLOG,HMPREF9220_1161,DINUCLEAR METAL CENTER PROTEIN, YBGI FAMILY,E4L8H6_9FIRM,EFR42902,EFR42902.1,313119715,GI:313119715,WP_007554289.1,E4L8H6
742743.HMPREF9453_00661	EHO63644.1	Dialister succinatiphilus	742743	aliases:GTP CYCLOHYDROLASE 1 TYPE 2 HOMOLOG,371935901,HMPREF9453_00661,GI:371935901,WP_008859165.1,H1CZ73_9FIRM,H1CZ73,YBGI/FAMILY DINUCLEAR METAL CENTER PROTEIN,EHO63644.1,EHO63644
246195.DNO_0852	DNO_0852	Dichelobacter nodosus	246195	aliases:A5EYD5_DICNV,GI:146232915,146232915,DNO_0852,ABQ13893,ABQ13893.1,DNO:DNO_0852,A5EYD5,WP_012031173.1
590409.Dd586_1178	Dd586_1178	Dickeya dadantii	590409	aliases:DDC:DD586_1178,WP_012883899.1,33923876,ACZ76062.1,D2BVA8_DICZ5,INTERPRO:IPR002678,DD586_1178,270343297,D2BVA8,ACZ76062,PROTEIN OF UNKNOWN FUNCTION DUF34,GI:270343297,IPR002678
198628.Dda3937_01545	ybgI	Dickeya dadantii	198628	aliases:DDA3937_01545,ADM97546,9732763,E0SEY4_DICD3,ASAP:ABF-0016963,ABF-0016963,DDD:DDA3937_01545,METAL-BINDING PREDICTED HYDROLASE-OXIDASE,GI:306527616,WP_013317009.1,306527616,E0SEY4,ADM97546.1,YBGI
579405.Dd703_1135	Dd703_1135	Dickeya dadantii	579405	aliases:ACS84940.1,C6CCC9_DICP7,DD703_1135,INTERPRO:IPR002678,C6CCC9,GI:242130638,DDA:DD703_1135,PROTEIN OF UNKNOWN FUNCTION DUF34,ACS84940,242130638,IPR002678
568768.CM001975_gene1165	568768.CM001975_gene1165	Dickeya sp.	568768	aliases:CM001975_GENE1165
1577887.JSYG01000032_gene2497	1577887.JSYG01000032_gene2497	Dickeya sp.	1577887	aliases:JSYG01000032_GENE2497
1225785.CM001983_gene1168	1225785.CM001983_gene1168	Dickeya sp.	1225785	aliases:CM001983_GENE1168
561229.Dd1591_2923	ACT07745.1	Dickeya zeae	561229	aliases:IPR002678,C6CPU3_DICC1,INTERPRO:IPR002678,ACT07745,247539124,ACT07745.1,C6CPU3,PROTEIN OF UNKNOWN FUNCTION DUF34,DD1591_2923,DZE:DD1591_2923,GI:247539124
309799.DICTH_1619	DICTH_1619	Dictyoglomus thermophilum	309799	aliases:B5YAG3_DICT6,ACI18442,206739384,WP_012547074.1,ACI18442.1,DTH:DICTH_1619,B5YAG3,GI:206739384,DICTH_1619
515635.Dtur_1728	Dtur_1728	Dictyoglomus turgidum	515635	aliases:B8E3C6_DICTD,WP_012584075.1,7082248,B8E3C6,217337207,GI:217337207,ACK43000.1,YP_002353614,YP_002353614.1,DTU:DTUR_1728,DTUR_1728,ACK43000
44689.DDB0216648	nif3	Dictyostelium discoideum	44689	aliases:Q55E83,NIF3L_DICDI,PWY-6983,XM_640806,DDB_G0270854,XP_645898,PWY-6147,XM_640806.1,NIF3,PWY-6703,NIF3-LIKE PROTEIN 1,UPA00848,NIF3L1,PROTEIN NIF3 HOMOLOG,PWY-5664,XP_645898.1,8616840,DDI:DDB_G0270854,DDB0216648,PWY-5663,UPI00004E4086,EAL72777.1
5786.XP_003287063.1	5786.XP_003287063.1	Dictyostelium purpureum	5786	aliases:F0ZI11_DICPU,XP_003287063,F0ZI11,GI:330798038,INTERPRO:IPR002678,DPP:DICPUDRAFT_151116,XM_003287015.1,DICPUDRAFT_151116,330798038,10500707,DICPU1_151116,NIF3-LIKE PROTEIN 1,XP_003287063.1,GENEID:10500707,JGIDB:DICPU1_151116,IPR002678
1077144.AGFF01000008_gene128	1077144.AGFF01000008_gene128	Dietzia alimentaria	1077144	aliases:AGFF01000008_GENE128
1292020.H483_0104420	EYT64436.1	Dietzia sp.	1292020	aliases:GI:602241090,GTP CYCLOHYDROLASE 1 TYPE 2 HOMOLOG,A0A022LLE9,A0A022LLE9_9ACTN,602241090,WP_017835604.1,EYT64436,EYT64436.1,H483_0104420
278957.ABEA03000047_gene1277	278957.ABEA03000047_gene1277	Diplosphaera colitermitum	278957	aliases:ABEA03000047_GENE1277
983548.Krodi_1772	Krodi_1772	Dokdonia sp.	983548	aliases:F4B2T0,WP_013751263.1,AEE19755.1,INTERPRO:IPR017221,INTERPRO:IPR002678,AEE19755,KDI:KRODI_1772,F4B2T0_DOKS4,GTP CYCLOHYDROLASE 1 TYPE 2 HOMOLOG,KRODI_1772,GI:332170500,332170500,PROTEIN OF UNKNOWN FUNCTION DUF34,IPR017221,IPR002678
313590.MED134_01390	EAQ39231.1	Dokdonia sp.	313590	aliases:GI:85818063,MED134_01390,EAQ39231,85818063,DOK:MED134_01390,NIF3 (NGG1P INTERACTING FACTOR 3),EAQ39231.1
1239415.CM001837_gene1635	1239415.CM001837_gene1635	Dokdonia sp.	1239415	aliases:CM001837_GENE1635
883103.HMPREF9703_01066	EHR32950.1	Dolosigranulum pigrum	883103	aliases:374561611,EHR32950,GTP CYCLOHYDROLASE 1 TYPE 2 HOMOLOG,GI:374561611,H3NET5_9LACT,EHR32950.1,WP_004636196.1,HMPREF9703_01066,H3NET5,YBGI/FAMILY DINUCLEAR METAL CENTER PROTEIN
411461.DORFOR_00626	EDR47969.1	Dorea formicigenerans	411461	aliases:DORFOR_00626,GI:166029212,EDR47969.1,B0G305_9FIRM,DINUCLEAR METAL CENTER PROTEIN, YBGI FAMILY,EDR47969,INTERPRO:IPR002678,IPR002678,WP_005331188.1,166029212,B0G305
742765.HMPREF9457_00418	EGX77914.1	Dorea formicigenerans	742765	aliases:G1WMR7,345908257,EGX77914,GI:345908257,EGX77914.1,WP_005336799.1,G1WMR7_9FIRM,HMPREF9457_00418
411462.DORLON_00728	EDM64049.1	Dorea longicatena	411462	aliases:GI:149754118,EDM64049.1,149754118,INTERPRO:IPR002678,DORLON_00728,DINUCLEAR METAL CENTER PROTEIN, YBGI FAMILY,EDM64049,A6BEL0_9FIRM,A6BEL0,WP_006426749.1,IPR002678
1280698.AUJS01000010_gene850	1280698.AUJS01000010_gene850	Dorea longicatena	1280698	aliases:A0A174DKG9_9FIRM,A0A174DKG9,AUJS01000010_GENE850,METAL-BINDING PROTEIN,WP_006426749.1,ERS852408_00892,ERS852573_00511,ERS852482_00162,ERS852423_01020
1235798.C817_02068	C817_02068	Dorea sp.	1235798	aliases:WP_016218805.1,R9NA75_9FIRM,507823965,EOS80195,YBGI/FAMILY DINUCLEAR METAL CENTER PROTEIN,C817_02068,GI:507823965,R9NA75,EOS80195.1
1168034.FH5T_05640	FH5T_05640	Draconibacterium orientale	1168034	aliases:GTP CYCLOHYDROLASE 1 TYPE 2 HOMOLOG,DORI:FH5T_05640,WP_038556537.1,AHW59252.1,GI:610422048,X5DFT0,NGG1P INTERACTING FACTOR 3 PROTEIN, NIF3,AHW59252,X5DFT0_9BACT,FH5T_05640,610422048,SAMN05444285_10840
7217.FBpp0117774	GF14582	Drosophila ananassae	7217	aliases:DANA\GF14582,UPI000177D9D8,DANA\\GF14582,XP_001962153,XP_001962153.2,XM_001962117,B3MJN5,GF14582,PWY-6703,DANA_GLEANR_15346,FBGN0091609,DAN:DANA_GF14582,DANA_GF14582,UPA00848,EDV31374.1,XP_001962153.1,PWY-6147,GF14582-RA,DANA\GF14582-PA,FBTR0119282,FBPP0117774,GF14582-PA,6497404,XM_001962117.1,B3MJN5_DROAN
7220.FBpp0143751	GG25205	Drosophila erecta	7220	aliases:DERE\GG25205-PA,GG25205-PA,GG25205,FBPP0143751,FBTR0145259,B3N6D3_DROER,GG25205-RA,DERE\\GG25205,PWY-6983,6541387,PWY-5663,UPI000177F5C1,PWY-6703,EDV58102.1,DERE_GG25205,XP_001969043,UPA00848,DERE\GG25205,B3N6D3,PWY-5664,PWY-6147,FBGN0117329,XP_001969043.1,XM_001969007,XM_001969007.1,PWY-7442,DERE_GLEANR_9860,DER:DERE_GG25205
7222.FBpp0144222	GH10316	Drosophila grimshawi	7222	aliases:B4JAB4_DROGR,DGRI_GH10316,B4JAB4,FBTR0145730,UPI00017C58F9,DGRI\GH10316-PA,DGRI\GH10316,FBGN0117797,XP_001988918,XM_001988882,XM_001988882.1,DGRI_GLEANR_10267,XP_001988918.1,6561874,EDW03785.1,DGRI\\GH10316,FBPP0144222,GH10316,GH10316-RA,GH10316-PA,DGR:DGRI_GH10316
7227.FBpp0080392	CG4278	Drosophila melanogaster	7227	aliases:AW942896,NP_609790,AY069556,60981,AAF45006,CG4278,AA949980,NP_609790.1,CG4278-RA,UN5,DME:DMEL_CG4278,BG:DS02740.16,AAL39701.2,CZ478959,NM_135946.2,ANON-35F/36A,UNNAMED,FBAN0004278,AA141212,UPI0000000F8F,NM_135946,NIF3-LIKE PROTEIN 1,34970,NIF3L_DROME,Q9VJL4,CG4278-PA,DMELCG4278,FBGN0014092,PROTEIN ANON-35F/36A,FBPP0080392,FBTR0080834,AAF53525.2,Q9NK57
7230.FBpp0166294	GI17077	Drosophila mojavensis	7230	aliases:GI17077-RA,DMOJ\GI17077-PA,FBTR0167802,FBGN0139822,XP_002001865.2,XP_002001865.1,DMOJ_GI17077,DMO:DMOJ_GI17077,DMOJ\\GI17077,B4KI25,XM_002001829,XM_002001829.1,6575861,DMOJ_GLEANR_1880,DMOJ\GI17077,FBPP0166294,GI17077,B4KI25_DROMO,GI17077-PA,UPI00017C8920,XP_002001865,EDW11307.1
7234.FBpp0180459	GL16352	Drosophila persimilis	7234	aliases:XM_002020878,DPER\GL16352,GL16352-PA,PWY-6703,DPER\\GL16352,DPER_GL16352,UPI00017CD1F9,DPER_GLEANR_1800,DPER\GL16352-PA,B4GQN5,6595566,GL16352-RA,UPA00848,FBPP0180459,XM_002020878.1,PWY-6147,EDW39907.1,B4GQN5_DROPE,FBTR0181967,XP_002020914,GL16352,XP_002020914.1,FBGN0153956,DPE:DPER_GL16352
7237.FBpp0285174	GA18076	Drosophila pseudoobscura	7237	aliases:EAL34190.2,DPO:DPSE_GA18076,FBGN0078084,DPSE\\GA18076,UPI00017FBB89,DPSE\GA18076-PA,XP_001357124.2,XP_001357124.3,DPSE_GA18076,4817722,XM_001357088,FBTR0286736,GA18076,Q29NM8_DROPS,FBPP0285174,GA18076-RA,DPSE_GLEANR_6786,GA18076-PA,DPSE\GA18076,XP_001357124,Q29NM8,XM_001357088.2
7237.FBpp0280206	GA25846	Drosophila pseudoobscura	7237	aliases:GA25846,XM_002132504.1,FBGN0247223,GA25846-PA,GA25846-RA,DPSE_GLEANR_2161,FBTR0281768,UPI00017FBBAB,XP_002132540,FBPP0280206,DPSE\\GA25846,XP_002132540.1,XM_002132504
7244.FBpp0225068	GJ10651	Drosophila virilis	7244	aliases:DVIR\\GJ10651,GJ10651-RA,FBGN0197929,EDW63901.1,UPI00017D414F,B4LTD1_DROVI,GJ10651-PA,DVIR_GLEANR_1056,B4LTD1,DVIR\GJ10651-PA,DVIR\GJ10651,FBTR0226576,XM_002051710.1,FBPP0225068,6627729,XP_002051746,XM_002051710,DVI:DVIR_GJ10651,DVIR_GJ10651,GJ10651,XP_002051746.1,XP_002051746.2
7260.FBpp0253844	GK24701	Drosophila willistoni	7260	aliases:6644343,GK24701-RA,XP_002066857,DWI:DWIL_GK24701,XP_002066857.1,UPI00017D79A7,FBTR0255352,FBPP0253844,XM_002066821.1,DWIL\\GK24701,FBGN0226661,DWIL\GK24701,DWIL\GK24701-PA,DWIL_GLEANR_8838,DWIL_GK24701,B4MZQ8_DROWI,XM_002066821,GK24701,B4MZQ8,GK24701-PA,EDW77843.1,XP_002066857.2
7245.FBpp0266485	GE21475	Drosophila yakuba	7245	aliases:FBGN0238732,EDW89666.1,GE21475-RA,FBPP0266485,GE21475-PA,XP_002089954.1,DYAK\GE21475,B4NXP1,B4NXP1_DROYA,PWY-6983,XM_002089918.1,FBTR0267993,6528922,PWY-6703,DYAK_GE21475,UPI00017DB224,UPA00848,DYAK\\GE21475,DYA:DYAK_GE21475,PWY-5664,PWY-5663,DYAK_GLEANR_523,XM_002089918,XP_002089954,PWY-6147,GE21475,DYAK\GE21475-PA
1121481.AUAS01000007_gene1098	1121481.AUAS01000007_gene1098	Dyadobacter alkalitolerans	1121481	aliases:AUAS01000007_GENE1098
471854.Dfer_5147	Dfer_5147	Dyadobacter fermentans	471854	aliases:GI:254951647,DFER_5147,C6VSB2,INTERPRO:IPR002678,ACT96347,WP_015814588.1,ACT96347.1,DFE:DFER_5147,GTP CYCLOHYDROLASE 1 TYPE 2 HOMOLOG,PROTEIN OF UNKNOWN FUNCTION DUF34,254951647,C6VSB2_DYAFD,IPR002678
1434325.AZQN01000004_gene1433	1434325.AZQN01000004_gene1433	Dyadobacter tibetensis	1434325	aliases:AZQN01000004_GENE1433
742766.HMPREF9455_01134	EGK02884.1	Dysgonomonas gadei	742766	aliases:F5IW84,GTP CYCLOHYDROLASE 1 TYPE 2 HOMOLOG,EGK02884.1,EGK02884,F5IW84_9BACT,GI:332830256,HMPREF9455_01134,332830256
742767.HMPREF9456_01958	EGK03321.1	Dysgonomonas mossii	742767	aliases:EGK03321,GTP CYCLOHYDROLASE 1 TYPE 2 HOMOLOG,HMPREF9456_01958,F8X149,GI:332883037,F8X149_9BACT,EGK03321.1,332883037
1121859.KB890739_gene2511	1121859.KB890739_gene2511	Echinicola pacifica	1121859	aliases:KB890739_GENE2511
926556.Echvi_2350	Echvi_2350	Echinicola vietnamensis	926556	aliases:L0FZZ6,AGA78598.1,DINUCLEAR METAL CENTER PROTEIN, YBGI/SA1388 FAMILY,INTERPRO:IPR017221,GI:430788469,AGA78598,WP_015266154.1,ECHVI_2350,GTP CYCLOHYDROLASE 1 TYPE 2 HOMOLOG,L0FZZ6_ECHVK,IPR017221,INTERPRO:IPR002678,EVI:ECHVI_2350,430788469,IPR002678
6211.A0A068YJW5	6211.A0A068YJW5	Echinococcus multilocularis	6211	aliases:NIF3 PROTEIN 1,A0A068YJW5,PUTATIVE GTP CYCLOHYDROLASE 1 TYPE 2 OS=ECHINOCOCCUS MULTILOCULARIS GN=EMUJ_001028000 PE=3 SV=1,A0A068YJW5_ECHMU,EMUJ_001028000
9371.XP_004701585.1	NIF3L1	Echinops telfairi	9371	aliases:XM_004701528.1,XP_004701585,NIF3-LIKE PROTEIN 1,GI:507641187,GENEID:101662321,NIF3L1,XP_004701585.1,507641187,101662321
519989.ECTPHS_01774	EHQ51389.1	Ectothiorhodospira sp.	519989	aliases:H1G0Q2,GI:373940844,EHQ51389.1,WP_008930956.1,373940844,H1G0Q2_9GAMM,EHQ51389,ECTPHS_01774
1216966.BAUC01000015_gene497	1216966.BAUC01000015_gene497	Edwardsiella hoshinae	1216966	aliases:AOV96249,WP_070244632.1,NIF3-LIKE DINUCLEAR METAL CENTER PROTEIN,BAUC01000015_GENE497,A9798_04335,A0A1D8MW41,A0A1D8MW41_9GAMM,EHO:A9798_04335
667121.ET1_12_02200	GAC64694.1	Edwardsiella tarda	667121	aliases:PUTATIVE METAL-BINDING PROTEIN,451315326,M0Q8B4_EDWTA,ET1_12_02200,GI:451315326,WP_005288963.1,M0Q8B4,GAC64694,GAC64694.1
479437.Elen_1349	Elen_1349	Eggerthella lenta	479437	aliases:ACV55318.1,C8WGS7,INTERPRO:IPR002678,257474998,WP_009304522.1,ELE:ELEN_1349,GI:257474998,PROTEIN OF UNKNOWN FUNCTION DUF34,ACV55318,ELEN_1349,C8WGS7_EGGLE,IPR002678
502558.EGYY_17520	EGYY_17520	Eggerthella sp.	502558	aliases:338905037,BAK44888.1,F7UUL5,EYY:EGYY_17520,BAK44888,F7UUL5_EEGSY,EGYY_17520,WP_013980132.1,GI:338905037
999415.HMPREF9943_01192	EMD16638.1	Eggerthia catenaformis	999415	aliases:EMD16638.1,449337476,EMD16638,GI:449337476,M2NEK0,HMPREF9943_01192,YBGI/FAMILY DINUCLEAR METAL CENTER PROTEIN,M2NEK0_9FIRM,WP_004803098.1
546274.EIKCOROL_00756	ybgI	Eikenella corrodens	546274	aliases:WP_003822652.1,224943364,EEG24573.1,INTERPRO:IPR002678,29690306,ECOR:SAMEA4412678_2043,METAL-BINDING PROTEIN,C0DTS6_EIKCO,DINUCLEAR METAL CENTER PROTEIN, YBGI FAMILY,EIKCOROL_00756,GI:224943364,EEG24573,YBGI,C0DTS6,SNW10639,IPR002678
28737.XP_006889139.1	NIF3L1	Elephantulus edwardii	28737	aliases:XP_006889139.1,XM_006889077.1,XP_006889139,PUTATIVE GTP CYCLOHYDROLASE 1 TYPE 2 NIF3L1 ISOFORM X1,GI:585670929,GENEID:102851695,NIF3L1,102851695,585670929
1338011.BD94_2491	BD94_2491	Elizabethkingia anophelis	1338011	aliases:BD94_2491,GTP CYCLOHYDROLASE 1 TYPE 2 HOMOLOG,A0A077EF29_9FLAO,GI:675104973,AIL46266,AIL46266.1,23373731,A0A077EF29,675104973,WP_024565566.1,EAO:BD94_2491
1216967.L100_05136	EOR30677.1	Elizabethkingia meningoseptica	1216967	aliases:A0A1V3TY81_ELIME,GI:507152512,EOR30677.1,507152512,WP_069214250.1,L100_05136,EMG:BBD33_10540,GTP CYCLOHYDROLASE 1 TYPE 2 HOMOLOG,BMF97_13535,A0A1V3TY81,EOR30677,AQX05657
172045.KS04_13140	VO54_00222	Elizabethkingia miricola	172045	aliases:ELB:VO54_00222,GTP CYCLOHYDROLASE 1 TYPE 2 HOMOLOG,A0A0D5BIX7_ELIMR,GI:700267908,KGO09825.1,KS04_13140,NGG1P INTERACTING FACTOR 3 PROTEIN, NIF3,KGO09825,VO54_00222,WP_045179110.1,700267908,AJW61716,A0A0D5BIX7
2903.EOD33347	2903.EOD33347	Emiliania huxleyi	2903	aliases:17278618,KB864445.1:CDS:COMPLEMENT(JOIN(185364..185414,185970..186017,186123..186731)),EMIHUDRAFT_229910,PWY-6703,UPI00032C6B6B,XP_005785776.1,EOD33347.1,EOD33347,XP_005785776,PWY-6147,UPA00848,R1DEG7_EMIHU,EHX:EMIHUDRAFT_229910,PWY-6983,PWY-5664,KB864445.1:MRNA:COMPLEMENT(JOIN(<185364..185414,185970..186017,186123..>186731)),PWY-5663,R1DEG7,NIF3-LIKE PROTEIN
2903.EOD14181	2903.EOD14181	Emiliania huxleyi	2903	aliases:17260330,UPI00032C094E,XP_005766610,R1DTR5,EOD14181,KB867261.1:MRNA:JOIN(56013..56634,56738..56785,56935..57048,57367..57413,57484..57879),NIF3-LIKE PROTEIN,KB867261.1:CDS:JOIN(56020..56634,56738..56785,56935..57048,57367..57413,57484..57520),EHX:EMIHUDRAFT_470649,EMIHUDRAFT_470649,R1DTR5_EMIHU,EOD14181.1,XP_005766610.1
1218108.KB908291_gene570	1218108.KB908291_gene570	Empedobacter brevis	1218108	aliases:KB908291_GENE570
929562.Emtol_3204	Emtol_3204	Emticicia oligotrophica	929562	aliases:AFK04333.1,GI:387856236,GTP CYCLOHYDROLASE 1 TYPE 2 HOMOLOG,AFK04333,INTERPRO:IPR002678,387856236,NGG1P INTERACTING FACTOR 3 PROTEIN, NIF3,I2EXD0,I2EXD0_EMTOG,EMTOL_3204,EOL:EMTOL_3204,IPR002678,IPR017221,INTERPRO:IPR017221
364733.XP_007803083.1	EPUS_05313	Endocarpon pusillum	364733	aliases:XP_007803083,EPUS_05313,U1GHI3_ENDPU,XP_007803083.1,GENEID:19240266,U1GHI3,GI:629653837,629653837,19240266,XM_007804892.1
1049564.TevJSym_ag00100	EGW54932.1	endosymbiont of	1049564	aliases:EGW54932,345125060,WP_005961936.1,TEVJSYM_AG00100,GI:345125060,EGW54932.1,G2FDU8,G2FDU8_9GAMM,PROTEIN OF UNKNOWN FUNCTION DUF34
305900.GV64_21945	GV64_21945	Endozoicomonas elysicola	305900	aliases:WP_020581739.1,658304632,GV64_21945,METAL-BINDING PROTEIN,KEI73025,KEI73025.1,GI:658304632,A0A081KFU9,A0A081KFU9_9GAMM
1027273.GZ77_20055	GZ77_20055	Endozoicomonas montiporae	1027273	aliases:A0A081N2T7_9GAMM,KEQ12760,KEQ12760.1,662307436,METAL-BINDING PROTEIN,WP_034878129.1,GZ77_20055,GI:662307436,A0A081N2T7
1137799.GZ78_03135	GZ78_03135	Endozoicomonas numazuensis	1137799	aliases:GI:662313768,WP_034832627.1,KEQ19038.1,METAL-BINDING PROTEIN,KEQ19038,GZ78_03135,662313768,A0A081NKR5_9GAMM,A0A081NKR5
553217.ENHAE0001_2463	EEV22548.1	Enhydrobacter aerosaccus	553217	aliases:EEV22548.1,GI:257447549,EEV22548,DINUCLEAR METAL CENTER PROTEIN, YBGI FAMILY,257447549,ENHAE0001_2463
1118060.CAGZ01000024_gene583	1118060.CAGZ01000024_gene583	Enorma massiliensis	1118060	aliases:B5G21_00490,A0A1Y3UGG1_9ACTN,CAGZ01000024_GENE583,A0A1Y3UGG1
46681.XP_001734200.1	EDI_060570	Entamoeba dispar	46681	aliases:B0E740,EDI:EDI_060570,NGG1-INTERACTING FACTOR,GENEID:5879097,XP_001734200.1,5879097,EDI_060570,XP_001734200,167376897,GI:167376897,XM_001734148.1,NGG1-INTERACTING FACTOR, PUTATIVE,B0E740_ENTDS
5759.rna_EHI_161860-1	EHI_161860	Entamoeba histolytica	5759	aliases:XM_644213,NGG1-INTERACTING FACTOR 3 PUTATIVE,PWY-5663,PWY-6983,A0A175JTQ2,PWY-6147,XM_644213.2,EHI_161860,PWY-6703,A0A175JTQ2_ENTHI,UPA00848,C4M6M9_ENTHI,EAL43916.1,NGG1-INTERACTING FACTOR 3,321.T00008,PWY-5664,RNA_EHI_161860-1,NGG1-INTERACTING FACTOR 3, PUTATIVE,XP_649305.1,UPI0000498D37,CL6EHI_161860,PWY-7442,XP_649305,EHI:EHI_161860
1028307.EAE_14105	EAE_14105	Enterobacter aerogenes	1028307	aliases:A0A0H3FSZ9,YP_004593013.1,10793038,GI:334735359,AEG97734,334735359,METAL-BINDING PROTEIN,EAE:EAE_14105,EAE_14105,WP_015367684.1,AEG97734.1,A0A0H3FSZ9_KLEAK,YP_004593013
640513.Entas_1194	Entas_1194	Enterobacter asburiae	640513	aliases:WP_014069368.1,AEN63940.1,EAS:ENTAS_1194,INTERPRO:IPR002678,AEN63940,NGG1P INTERACTING FACTOR 3 PROTEIN, NIF3,ENTAS_1194,G2S1V1_ENTAL,345092304,GI:345092304,G2S1V1,IPR002678
1045856.EcWSU1_01263	ybgI	Enterobacter cloacae	1045856	aliases:AIX55703,GI:365748475,AEW72702,AEW72702.1,ECLN:ECNIH4_16115,YBGI,UPF0135 PROTEIN YBGI,G8LF02_ENTCL,G8LF02,365748475,ECWSU1_01263
716541.ECL_03017	ECL_03017	Enterobacter cloacae	716541	aliases:A0A0H3CN26_ENTCC,AIX55703,9125496,PUTATIVE HYDROLASE-OXIDASE,ECL_03017,A0A0H3CN26,WP_013097550.1,GI:295057815,ADF62553.1,ECLN:ECNIH4_16115,295057815,YP_003613502.1,ADF62553
1399774.JDWH01000007_gene1565	ybgI	Enterobacter cloacae	1399774	aliases:AIX55703,A0A157TGA3,PROTEIN YBGI,WP_015367684.1,ECLN:ECNIH4_16115,JDWH01000007_GENE1565,YBGI,SAMEA2273283_00455,A0A157TGA3_ENTCL
701347.Entcl_3114	Entcl_3114	Enterobacter lignolyticus	701347	aliases:WP_013367090.1,E3G3V4_ENTLS,ENTCL_3114,ADO49360.1,308749608,INTERPRO:IPR002678,E3G3V4,ESC:ENTCL_3114,GI:308749608,PROTEIN OF UNKNOWN FUNCTION DUF34,ADO49360,IPR002678
399742.Ent638_1213	ABP59894.1	Enterobacter sp.	399742	aliases:ABP59894,A4W864,INTERPRO:IPR002678,PROTEIN OF UNKNOWN FUNCTION DUF34,GI:145317747,145317747,A4W864_ENT38,ABP59894.1,ENT:ENT638_1213,ENT638_1213,IPR002678
1166130.H650_22285	H650_22285	Enterobacter sp.	1166130	aliases:H650_22285,GI:511530211,R9VTX6_9ENTR,AGN87751.1,ENR:H650_22285,METAL-BINDING PROTEIN,511530211,R9VTX6,AGN87751,WP_020457046.1
1214065.BAGV01000032_gene651	1214065.BAGV01000032_gene651	Enterobacteriaceae bacterium	1214065	aliases:BAGV01000032_GENE651
1224136.AMFN01000002_gene268	1224136.AMFN01000002_gene268	Enterobacteriaceae bacterium	1224136	aliases:AMFN01000002_GENE268
693444.D782_3147	D782_3147	Enterobacteriaceae bacterium	693444	aliases:DINUCLEAR METAL CENTER PROTEIN, YBGI/SA1388 FAMILY,EBF:D782_3147,440048033,GI:440048033,AGB79091.1,D782_3147,L0M8Q3_ENTBF,WP_015965331.1,AGB79091,L0M8Q3
1158606.I579_02279	UAS_00879	Enterococcus asini	1158606	aliases:EOT55915.1,GTP CYCLOHYDROLASE 1 TYPE 2 HOMOLOG,EOT55915,WP_010753528.1,GI:508181210,R2PY60_9ENTE,UAS_00879,508181210,YBGI/FAMILY DINUCLEAR METAL CENTER PROTEIN,I579_02279,R2PY60
1140002.I570_03702	OMU_04456	Enterococcus avium	1140002	aliases:S0KCG8_ENTAV,508243127,S0KCG8,OMU_04456,GI:508243127,GTP CYCLOHYDROLASE 1 TYPE 2 HOMOLOG,I570_03702,YBGI/FAMILY DINUCLEAR METAL CENTER PROTEIN,EOU16555.1,EOU16555
1158612.I580_01962	UC7_01661	Enterococcus caccae	1158612	aliases:GI:508186802,GTP CYCLOHYDROLASE 1 TYPE 2 HOMOLOG,UC7_01661,R3TW87,I580_01962,WP_010771788.1,R3TW87_9ENTE,508186802,YBGI/FAMILY DINUCLEAR METAL CENTER PROTEIN,EOT61060,EOT61060.1
565655.ECBG_00880	ECBG_00880	Enterococcus casseliflavus	565655	aliases:GTP CYCLOHYDROLASE 1 TYPE 2 HOMOLOG,C9A800,C9A800_ENTCA,ECBG_00880,EEV38611,ECAS:ECBG_00880
1121864.OMO_00482	OMO_00482	Enterococcus cecorum	1121864	aliases:554758841,GTP CYCLOHYDROLASE 1 TYPE 2 HOMOLOG,ESK62232,GI:554758841,OMO_00482,WP_016252144.1,S1QWH7,YBGI/FAMILY DINUCLEAR METAL CENTER PROTEIN,ESK62232.1,S1QWH7_9ENTE
1121865.OMW_00458	I568_01056	Enterococcus columbae	1121865	aliases:GTP CYCLOHYDROLASE 1 TYPE 2 HOMOLOG,WP_016182622.1,508167853,I568_01056,S1N6B5_9ENTE,OMW_00458,EOT44402.1,GI:508167853,S1N6B5,YBGI/FAMILY DINUCLEAR METAL CENTER PROTEIN,EOT44402
1139219.I569_00615	OMK_00585	Enterococcus dispar	1139219	aliases:GTP CYCLOHYDROLASE 1 TYPE 2 HOMOLOG,S1NYV7,508516401,GI:508516401,OMK_00585,EOW85321,WP_016171790.1,YBGI/FAMILY DINUCLEAR METAL CENTER PROTEIN,S1NYV7_9ENTE,I569_00615,EOW85321.1
1140001.I571_02060	I571_02060	Enterococcus durans	1140001	aliases:I571_02060,GTP CYCLOHYDROLASE 1 TYPE 2 HOMOLOG,EDU:LIU_09020,WP_016176542.1,S0RLF8_9ENTE,31916826,GI:508245638,S0RLF8,YBGI/FAMILY DINUCLEAR METAL CENTER PROTEIN,EOU19060.1,AKZ48511,508245638,EOU19060
226185.EF_1381	EF_1381	Enterococcus faecalis	226185	aliases:Q835J6_ENTFA,GTP CYCLOHYDROLASE 1 TYPE 2 HOMOLOG,NP_815102.1,NP_815102,EF_1381,AAO81172,AAO81172.1,GI:29343410,CONSERVED HYPOTHETICAL PROTEIN TIGR00486,Q835J6,EFA:EF1381,WP_002379409.1,29343410,1200281
1201292.DR75_455	DR75_455	Enterococcus faecalis	1201292	aliases:674289960,AIL04860,GTP CYCLOHYDROLASE 1 TYPE 2 HOMOLOG,EFQ:DR75_455,A0A1G1SE86_ENTFL,NIF3 FAMILY PROTEIN,A0A1G1SE86,GI:674289960,DR75_455,AIL04860.1,BHU49_02710,WP_023895294.1
1260356.D920_02032	D920_02032	Enterococcus faecalis	1260356	aliases:EPH96502,INTERPRO:IPR002678,514531696,GI:514531696,EPH96502.1,DINUCLEAR METAL CENTER PROTEIN, YBGI FAMILY,GTP CYCLOHYDROLASE 1 TYPE 2 HOMOLOG,S4E738_ENTFL,D920_02032,WP_016624796.1,S4E738,IPR002678
565664.EFXG_01597	EEW62158.1	Enterococcus faecium	565664	aliases:260073834,EEW62158,YBGI/FAMILY DINUCLEAR METAL CENTER PROTEIN,EFXG_01597,GI:260073834,EEW62158.1
1104325.M7W_1313	M7W_1313	Enterococcus faecium	1104325	aliases:445188294,EFM:M7W_1313,GI:445188294,AGE29936,AGE29936.1,M7W_1313
565653.EGBG_00877	EGBG_00877	Enterococcus gallinarum	565653	aliases:GTP CYCLOHYDROLASE 1 TYPE 2 HOMOLOG,C8ZYH6,C8ZYH6_ENTGE,GI:257803453,257803453,EGBG_00877,EEV32275.1,WP_003126502.1,EEV32275
1158614.I592_01684	UKC_02284	Enterococcus gilvus	1158614	aliases:R2XN76_9ENTE,GTP CYCLOHYDROLASE 1 TYPE 2 HOMOLOG,508513450,I592_01684,UKC_02284,EOW82381.1,GI:508513450,R2XN76,YBGI/FAMILY DINUCLEAR METAL CENTER PROTEIN,EOW82381
1158608.I583_01720	UAW_00693	Enterococcus haemoperoxidus	1158608	aliases:I583_01720,GTP CYCLOHYDROLASE 1 TYPE 2 HOMOLOG,R2T3H0_9ENTE,EOT62719,29839389,GI:508188463,UAW_00693,YBGI/FAMILY DINUCLEAR METAL CENTER PROTEIN,WP_010760903.1,EOT62719.1,R2T3H0,508188463
768486.EHR_11120	EHR_11120	Enterococcus hirae	768486	aliases:392336821,I6SEL8_ENTHA,13178124,AFM71103,AFM71103.1,I6SEL8,EHR_11120,GTP CYCLOHYDROLASE 1 TYPE 2 HOMOLOG,I584_00827,WP_010737673.1,GI:392336821,EHR:EHR_11120
888064.HMPREF9088_1215	EFU74037.1	Enterococcus italicus	888064	aliases:E6LFS5_9ENTE,EFU74037.1,GTP CYCLOHYDROLASE 1 TYPE 2 HOMOLOG,315483543,GI:315483543,E6LFS5,WP_007208233.1,DINUCLEAR METAL CENTER PROTEIN, YBGI FAMILY,EFU74037,HMPREF9088_1215
1158601.I585_00086	UAI_00154	Enterococcus malodoratus	1158601	aliases:R2S3J5_9ENTE,GTP CYCLOHYDROLASE 1 TYPE 2 HOMOLOG,I585_00086,508196335,GI:508196335,EOT70575,R2S3J5,YBGI/FAMILY DINUCLEAR METAL CENTER PROTEIN,UAI_00154,EOT70575.1
1158609.I586_00721	UAY_01146	Enterococcus moraviensis	1158609	aliases:GTP CYCLOHYDROLASE 1 TYPE 2 HOMOLOG,WP_010764536.1,UAY_01146,EOT73727,R2T2T4_9ENTE,508199502,I586_00721,YBGI/FAMILY DINUCLEAR METAL CENTER PROTEIN,GI:508199502,R2T2T4,EOT73727.1
1300150.EMQU_1542	EMQU_1542	Enterococcus mundtii	1300150	aliases:BAO07099.1,GTP CYCLOHYDROLASE 1 TYPE 2 HOMOLOG,BAO07099,EMU:EMQU_1542,WP_023519764.1,V5XR38,558609294,GI:558609294,V5XR38_ENTMU,31547643,EMQU_1542
1158607.UAU_03907	UAU_03907	Enterococcus pallens	1158607	aliases:R2Q424,UAU_03907,GI:486857117,R2Q424_9ENTE,486857117,GTP CYCLOHYDROLASE 1 TYPE 2 HOMOLOG,EOH90078,EOH90078.1,YBGI/FAMILY DINUCLEAR METAL CENTER PROTEIN,WP_010758854.1
1158610.UC3_00878	UC3_00878	Enterococcus phoeniculicola	1158610	aliases:GTP CYCLOHYDROLASE 1 TYPE 2 HOMOLOG,EOL46073,GI:487228378,WP_010767551.1,UC3_00878,EOL46073.1,R3TY56,YBGI/FAMILY DINUCLEAR METAL CENTER PROTEIN,487228378,R3TY56_9ENTE
1158602.I590_03895	UAK_01662	Enterococcus raffinosus	1158602	aliases:R2P5F7_9ENTE,GTP CYCLOHYDROLASE 1 TYPE 2 HOMOLOG,I590_03895,EOT71067.1,GI:508196837,UAK_01662,YBGI/FAMILY DINUCLEAR METAL CENTER PROTEIN,508196837,EOT71067,R2P5F7
1139996.OMQ_01078	OMQ_01078	Enterococcus saccharolyticus	1139996	aliases:EOT29126,GTP CYCLOHYDROLASE 1 TYPE 2 HOMOLOG,S0JQA5,OMQ_01078,S0JQA5_9ENTE,508152342,GI:508152342,YBGI/FAMILY DINUCLEAR METAL CENTER PROTEIN,EOT29126.1,WP_016174876.1
1140003.I573_01625	I573_01625	Enterococcus sulfureus	1140003	aliases:I573_01625,508209696,GTP CYCLOHYDROLASE 1 TYPE 2 HOMOLOG,EOT83900,S0P180,GI:508209696,S0P180_9ENTE,YBGI/FAMILY DINUCLEAR METAL CENTER PROTEIN,WP_016185505.1,EOT83900.1
1158604.I591_00745	UAO_02101	Enterococcus villorum	1158604	aliases:I591_00745,GTP CYCLOHYDROLASE 1 TYPE 2 HOMOLOG,508508937,EOW77891,UAO_02101,R2RVS1,GI:508508937,YBGI/FAMILY DINUCLEAR METAL CENTER PROTEIN,EOW77891.1,R2RVS1_9ENTE
1235794.C811_00319	C811_00319	Enterorhabdus caecimuris	1235794	aliases:EOS52296.1,EOS52296,R9L1L4_9ACTN,GI:507794522,WP_016308560.1,C811_00319,507794522,R9L1L4
1121866.AUGK01000012_gene1780	1121866.AUGK01000012_gene1780	Enterorhabdus mucosicola	1121866	aliases:AUGK01000012_GENE1780
1190606.AJYG01000089_gene4594	1190606.AJYG01000089_gene4594	Enterovibrio calviensis	1190606	aliases:AJYG01000089_GENE4594
1190603.AJYD01000039_gene2803	1190603.AJYD01000039_gene2803	Enterovibrio norvegicus	1190603	aliases:AJYD01000039_GENE2803
421072.IO89_18795	IO89_18795	Epilithonimonas lactis	421072	aliases:GTP CYCLOHYDROLASE 1 TYPE 2 HOMOLOG,A0A085B6T3_9FLAO,KFC18178.1,WP_034979247.1,A0A085B6T3,IO89_18795,668736945,KFC18178,NGG1P INTERACTING FACTOR 3 PROTEIN, NIF3,GI:668736945
1233951.IO90_16310	IO90_16310	Epilithonimonas sp.	1233951	aliases:WP_034968528.1,GTP CYCLOHYDROLASE 1 TYPE 2 HOMOLOG,KFC20700,GI:668739474,NGG1P INTERACTING FACTOR 3 PROTEIN, NIF3,KFC20700.1,A0A085BE05_9FLAO,IO90_16310,668739474,A0A085BE05
1121870.AUAA01000052_gene1543	1121870.AUAA01000052_gene1543	Epilithonimonas tenax	1121870	aliases:AUAA01000052_GENE1543
29078.XP_008144690.1	NIF3L1	Eptesicus fuscus	29078	aliases:641711070,PUTATIVE GTP CYCLOHYDROLASE 1 TYPE 2 NIF3L1 ISOFORM X1,GI:641711070,103290547,NIF3L1,XM_008146468.1,XP_008144690,XP_008144690.1,GENEID:103290547
908337.HMPREF9257_0918	EFR31947.1	Eremococcus coleocola	908337	aliases:HMPREF9257_0918,E4KLT6,EFR31947,312620524,DINUCLEAR METAL CENTER PROTEIN, YBGI FAMILY,E4KLT6_9LACT,GI:312620524,EFR31947.1,WP_006417433.1
1121871.AUAT01000004_gene1129	1121871.AUAT01000004_gene1129	Eremococcus coleocola	1121871	aliases:AUAT01000004_GENE1129
45285.XP_003644262.1	Ecym_1197	Eremothecium cymbalariae	45285	aliases:GI:363748088,G8JMY1,ERC:ECYM_1197,XM_003644214.1,G8JMY1_ERECY,ECYM_1197,11471362,363748088,GENEID:11471362,XP_003644262,XP_003644262.1
33169.AAS54723	33169.AAS54723	Eremothecium gossypii	33169	aliases:AAS54723,AGOS_AGR233W,AGR233W,Q74ZH4,4623201,Q74ZH4_ASHGO,AE016820.4:CDS:1502636..1503490,AGOS_AGR233W/AAS54723,AGO:AGOS_AGR233W,UPI0000253544,NM_211961,NM_211961.2,AAS54723.1,AE016820.4:MRNA:<1502636..>1503490,AGR233WP,NP_986899.1,NP_986899
9365.XP_007520572.1	NIF3L1	Erinaceus europaeus	9365	aliases:617590115,103111232,A0A1S2ZK34,PUTATIVE GTP CYCLOHYDROLASE 1 TYPE 2 NIF3L1,XP_007520572.1,XM_007520510.1,NIF3L1,NIF3-LIKE PROTEIN 1,XP_007520572,A0A1S2ZK34_ERIEU,GENEID:103111232,GI:617590115
665029.EAMY_1157	ybgI	Erwinia amylovora	665029	aliases:D4HZB4_ERWAC,UPF0135 PROTEIN YBGI,GI:291553062,291553062,UNIPROTKB/TREMBL:D4HZB4,INTERPRO:IPR002678,EAMY_1157,CBA20107,EAM:EAMY_1157,D4HZB4,YBGI,IPR002678,CBA20107.1
634500.EbC_12860	ybgI	Erwinia billingiae	634500	aliases:EBI:EBC_12860,D8MPR0,CAX58817.1,INTERPRO:IPR002678,WP_013201311.1,UNIPROTKB/TREMBL:D8MPR0,D8MPR0_ERWBE,EBC_12860,YBGI,CONSERVED UNCHARACTERIZED PROTEIN YBGI,299061701,IPR002678,CAX58817,GI:299061701
634499.EpC_24510	ybgI	Erwinia pyrifoliae	634499	aliases:CAX56230,YBGI,INTERPRO:IPR002678,D0FUA1,224964713,UNIPROTKB/TREMBL:D0FUA1,EPC_24510,CONSERVED UNCHARACTERIZED PROTEIN YBGI,EPY:EPC_24510,CAX56230.1,GI:224964713,IPR002678
465817.ETA_23170	ybgI	Erwinia tasmaniensis	465817	aliases:GI:188029486,188029486,CONSERVED HYPOTHETICAL PROTEIN YBGI,CAO97363.1,INTERPRO:IPR002678,B2VBP7_ERWT9,ETA:ETA_23170,WP_012442032.1,CAO97363,UNIPROTKB/TREMBL:B2VBP7,ETA_23170,YBGI,B2VBP7,IPR002678
371042.NG99_18630	NG99_18630	Erwinia typographi	371042	aliases:A0A0A3YYD6,WP_034896156.1,A0A0A3YYD6_9GAMM,METAL-BINDING PROTEIN,KGT90396.1,GI:712785565,KGT90396,NG99_18630,712785565
445974.CLORAM_01169	EDS19172.1	Erysipelatoclostridium ramosum	445974	aliases:EDS19172,INTERPRO:IPR002678,EDS19172.1,167704593,CLORAM_01169,DINUCLEAR METAL CENTER PROTEIN, YBGI FAMILY,B0N400_9FIRM,B0N400,GI:167704593,WP_003536411.1,IPR002678
877415.JNJQ01000001_gene2190	877415.JNJQ01000001_gene2190	Erysipelotrichaceae bacterium	877415	aliases:JNJQ01000001_GENE2190
877415.JNJQ01000006_gene857	877415.JNJQ01000006_gene857	Erysipelotrichaceae bacterium	877415	aliases:JNJQ01000006_GENE857
658659.HMPREF0983_04072	EFP59687.1	Erysipelotrichaceae bacterium	658659	aliases:HMPREF0983_04072,EFP59687,E2SS02_9FIRM,NIF3 (NGG1P INTERACTING FACTOR 3),E2SS02,308913871,GI:308913871,EFP59687.1
658659.HMPREF0983_04074	EFP59688.1	Erysipelotrichaceae bacterium	658659	aliases:HMPREF0983_04074,EFP59688,NIF3 (NGG1P INTERACTING FACTOR 3),E2SS03,GI:308913872,308913872,E2SS03_9FIRM,EFP59688.1
658659.HMPREF0983_01105	EFP62425.1	Erysipelotrichaceae bacterium	658659	aliases:GI:308916685,HMPREF0983_01105,E2SJA1,DINUCLEAR METAL CENTER PROTEIN, YBGI FAMILY,308916685,E2SJA1_9FIRM,EFP62425,EFP62425.1
502347.ESCAB7627_3772	EDS91054.1	Escherichia albertii	502347	aliases:170122123,B1EPE0,WP_000798860.1,NIF3 FAMILY PROTEIN,EDS91054.1,GI:170122123,EDS91054,ESCAB7627_3772,B1EPE0_ESCAT
1440052.EAKF1_ch0758c	AHE58666.1	Escherichia albertii	1440052	aliases:EAKF1_CH0758C,PUTATIVE HYDROLASE-OXIDASE,AHE58666.1,569536359,W0AKS8_9ESCH,AHE58666,GI:569536359,EAL:EAKF1_CH0758C,W0AKS8
155864.EDL933_0776	ybgI	Escherichia coli	155864	aliases:EDL933_0776,GTP CYCLOHYDROLASE 1 TYPE 2 HOMOLOG,GCH1L_ECO57,P75743,917104,ORF, HYPOTHETICAL PROTEIN,Z0861,NP_308762.1,667690369,ECS0735,GI:667690369,P0AFP8,ECE:Z0861,YBGI,HYPOTHETICAL PROTEIN YBGI,AIG66978,WP_000798871.1,AIG66978.1,AAG55033
469008.B21_00659	ybgI	Escherichia coli	469008	aliases:CAQ31176.1,UNIPROTKB/TREMBL:C6EJM8,CAQ31176,ENSEMBLGENOMES:CAQ31176,GI:242376472,INTERPRO:IPR002678,WP_000798859.1,CONSERVED METAL-BINDING PROTEIN,EBE:B21_00659,ECBD_2951,ENSEMBLGENOMES:B21_00659,242376472,A0A140NC19,YBGI,IPR002678,B21_00659,A0A140NC19_ECOBD,C6EJM8
362663.ECP_0723	ybgI	Escherichia coli	362663	aliases:ABE90_021330,CIJ97_25270,C3TIS2,EL79_3170,A9R57_13115,WR15_11290,CDL49_25810,AKN40_3502,ECONIH1_03975,UN86_13260,EC3234A_11C00060,COD30_19690,A5958_02580,BHF46_14845,CIJ94_01340,ABE93_002160,CIG25_16760,BMT49_05105,BK383_18240,HMPREF3040_04608,BTQ04_23375,A4T40_07130,ACN002_0717,BMT91_15425,BK334_19230,AW059_01045,A8M81_11815,BMT94_18450,BZL69_00025,BMR46_10850,BIQ87_03705,ABE95_002585,AU…
199310.c0789	ybgI	Escherichia coli	199310	aliases:GTP CYCLOHYDROLASE 1 TYPE 2 HOMOLOG,P75743,ECC:C0789,26107078,P0AFP7,GCH1L_ECOL6,AAN79262.1,AAN79262,YBGI,C0789,HYPOTHETICAL PROTEIN YBGI,GI:26107078,WP_000798871.1
511145.b0710	ybgI	Escherichia coli	511145	aliases:JW0700,GTP CYCLOHYDROLASE 1 TYPE 2 HOMOLOG,AAC73804.1,RADIATION RESISTANCE PROTEIN YBGI,YBGI,AAC73804,B0710,NP_415238.1,945824,P75743,P0AFP6,GI:1786928,1NMO,ECO:B0710,ECK0699,NP_415238,1NMP,EG13305,ECOGENE:EG13305,1786928,ASAP:ABE-0002424,GCH1L_ECOLI,NIF3 FAMILY METAL-BINDING PROTEIN,UNIPROTKB/SWISS-PROT:P0AFP6,WP_000798871.1,ABE-0002424
316407	ybgI	Escherichia coli	316407	aliases:JW0700,NP_415238.1,GTP CYCLOHYDROLASE 1 TYPE 2 HOMOLOG,945824,1NMO,P75743,CONSERVED METAL-BINDING PROTEIN,P0AFP6,BAA35374,RADIATION RESISTANCE PROTEIN YBGI,GCH1L_ECOLI,4062306,YBGI,1NMP,ECJ:JW0700,WP_000798871.1,B0710
481805.EcolC_2945	ybgI	Escherichia coli	481805	aliases:ABE90_021330,CIJ97_25270,C3TIS2,EL79_3170,A9R57_13115,ACA78572,ACA78572.1,WR15_11290,CDL49_25810,AKN40_3502,ECONIH1_03975,UN86_13260,EC3234A_11C00060,COD30_19690,A5958_02580,BHF46_14845,CIJ94_01340,ABE93_002160,CIG25_16760,BMT49_05105,BK383_18240,HMPREF3040_04608,169755873,BTQ04_23375,A4T40_07130,ACN002_0717,BMT91_15425,BK334_19230,AW059_01045,A8M81_11815,BMT94_18450,BZL69_00025,BMR46_108…
1115512.EH105704_06_00280	ybgI	Escherichia hermannii	1115512	aliases:GAB52258.1,H5V326,GI:377540439,H5V326_ATLHE,377540439,YBGI,GAB52258,HYPOTHETICAL PROTEIN YBGI,WP_002435997.1,EH105704_06_00280
754331.AEME01000001_gene1238	754331.AEME01000001_gene1238	Escherichia sp.	754331	aliases:AEME01000001_GENE1238
1115515.EV102420_13_00800	ybgI	Escherichia vulneris	1115515	aliases:WP_042392324.1,A0A090V6E0_ESCVU,GI:689828517,GAL58824.1,EV102420_13_00800,GAL58824,A0A090V6E0,YBGI,HYPOTHETICAL PROTEIN YBGI,689828517
8010.XP_010892575.1	nif3l1	Esox lucius	8010	aliases:GI:742197920,742197920,105024365,NIF3-LIKE PROTEIN 1 ISOFORM X1,XM_010894273.1,XP_010892575,XP_010892575.1,ELS:105024365,NIF3L1,PUTATIVE GTP CYCLOHYDROLASE 1 TYPE 2 NIF3L1,GENEID:105024365
663278.Ethha_1086	Ethha_1086	Ethanoligenens harbinense	663278	aliases:ADU26639,GTP CYCLOHYDROLASE 1 TYPE 2 HOMOLOG,E6U4L1,EHA:ETHHA_1086,315470035,GI:315470035,INTERPRO:IPR002678,ADU26639.1,E6U4L1_ETHHY,IPR017221,PROTEIN OF UNKNOWN FUNCTION DUF34,ETHHA_1086,IPR002678,INTERPRO:IPR017221
1286171.EAL2_c13830	AHM56678.1	Eubacterium acidaminophilum	1286171	aliases:GI:595613033,GTP CYCLOHYDROLASE 1 TYPE 2 HOMOLOG,AHM56678,AHM56678.1,595613033,EAL2_C13830,W8TFT3_PEPAC,WP_025435662.1,W8TFT3,EAC:EAL2_C13830
1321814.HMPREF9089_00448	ESE31031.1	Eubacterium brachy	1321814	aliases:ESE31031.1,WP_023152623.1,INTERPRO:IPR002678,553715960,HMPREF9089_00448,DINUCLEAR METAL CENTER PROTEIN, YBGI FAMILY,ESE31031,V1CQ85_9FIRM,IPR002678,V1CQ85,GI:553715960
1408437.JNJN01000007_gene965	1408437.JNJN01000007_gene965	Eubacterium desmolans	1408437	aliases:JNJN01000007_GENE965
883109.HMPREF0380_01052	EHO84651.1	Eubacterium infirmum	883109	aliases:GI:371967179,EHO84651,WP_006000582.1,EHO84651.1,H1PLQ4,HMPREF0380_01052,H1PLQ4_9FIRM,371967179
903814.ELI_2050	ELI_2050	Eubacterium limosum	903814	aliases:308739373,GTP CYCLOHYDROLASE 1 TYPE 2 HOMOLOG,E3GDV3_EUBLK,ELM:ELI_2050,ADO37033,E3GDV3,GI:308739373,ADO37033.1,WP_013380354.1,ELI_2050
1161902.HMPREF0378_1382	ETK00190.1	Eubacterium nodatum	1161902	aliases:HMPREF0378_1382,ETK00190,ETK00190.1,W2BZ60,567340049,GI:567340049,DINUCLEAR METAL CENTER PROTEIN, YBGI FAMILY,WP_034818943.1,W2BZ60_9FIRM
1235802.C823_02055	C823_02055	Eubacterium plexicaudatum	1235802	aliases:EMZ27914.1,GI:476621092,EMZ27914,C823_02055,WP_004061337.1,476621092,YBGI/FAMILY DINUCLEAR METAL CENTER PROTEIN,N2ATU6_9FIRM,N2ATU6
592031.GCWU000322_00553	EEU03275.1	Eubacterium saphenum	592031	aliases:IPR002678,C7GZY5,WP_005838237.1,255993186,GI:255993186,DINUCLEAR METAL CENTER PROTEIN, YBGI FAMILY,INTERPRO:IPR002678,GCWU000322_00553,C7GZY5_9FIRM,EEU03275,EEU03275.1
1235790.C805_01164	C805_01164	Eubacterium sp.	1235790	aliases:508150262,C805_01164,WP_016214222.1,GI:508150262,S0JEQ0,EOT27060,EOT27060.1,YBGI/FAMILY DINUCLEAR METAL CENTER PROTEIN,S0JEQ0_9FIRM
1392487.JIAD01000001_gene372	1392487.JIAD01000001_gene372	Eubacterium sp.	1392487	aliases:JIAD01000001_GENE372
888727.HMPREF9092_1560	EUC78675.1	Eubacterium sulci	888727	aliases:EUC78675.1,GI:577036196,AKT46929,EUC78675,X8K5C9,EUU:ADJ67_04210,WP_034811378.1,DINUCLEAR METAL CENTER PROTEIN, YBGI FAMILY,577036196,X8K5C9_9FIRM,HMPREF9092_1560
1121875.KB907554_gene443	1121875.KB907554_gene443	Eudoraea adriatica	1121875	aliases:KB907554_GENE443
97096.XP_007798206.1	97096.XP_007798206.1	Eutypa lata	97096	aliases:XP_007798206.1,19223782,UCREL1_10364,M7S957_EUTLA,GI:629672987,629672987,XP_007798206,PUTATIVE NGG1 INTERACTING FACTOR PROTEIN,XM_007800015.1,ELA:UCREL1_10364,GENEID:19223782,M7S957,EMR62674
910964.GEAM_0779	GEAM_0779	Ewingella americana	910964	aliases:A0A085GLC6,ASAP:AMA-0000776,KFC84521.1,GEAM_0779,KFC84521,GI:668967421,AMA-0000776,A0A085GLC6_9GAMM,YBGI FAMILY PROTEIN,668967421
1087448.Eab7_0807	Eab7_0807	Exiguobacterium antarcticum	1087448	aliases:K0ABC9,GTP CYCLOHYDROLASE 1 TYPE 2 HOMOLOG,WP_014969818.1,AFS69951,EAB7_0807,GI:407060761,407060761,EAN:EAB7_0807,AFS69951.1,K0ABC9_EXIAB
1397696.KK211189_gene1476	1397696.KK211189_gene1476	Exiguobacterium marinum	1397696	aliases:KK211189_GENE1476
1397699.JNIS01000001_gene2377	1397699.JNIS01000001_gene2377	Exiguobacterium oxidotolerans	1397699	aliases:JNIS01000001_GENE2377,A0A248L5W3_9BACL,GTP CYCLOHYDROLASE 1 TYPE 2 HOMOLOG,A0126_04195,A0A248L5W3
1345023.M467_14255	M467_14255	Exiguobacterium pavilionensis	1345023	aliases:ERG68437.1,GTP CYCLOHYDROLASE 1 TYPE 2 HOMOLOG,GI:540360283,540360283,U1M158_9BACL,M467_14255,U1M158,ERG68437,WP_021065701.1
262543.Exig_0835	Exig_0835	Exiguobacterium sibiricum	262543	aliases:ACB60315.1,GTP CYCLOHYDROLASE 1 TYPE 2 HOMOLOG,GI:171989393,31768990,WP_012369739.1,INTERPRO:IPR002678,PROTEIN OF UNKNOWN FUNCTION DUF34,ESI:EXIG_0835,171989393,B1YL83_EXIS2,EXIG_0835,ACB60315,IPR002678,B1YL83
360911.EAT1b_0586	EAT1b_0586	Exiguobacterium sp.	360911	aliases:GI:229467746,GTP CYCLOHYDROLASE 1 TYPE 2 HOMOLOG,C4L3Z6,C4L3Z6_EXISA,INTERPRO:IPR002678,EAT:EAT1B_0586,ACQ69518,WP_012726637.1,EAT1B_0586,PROTEIN OF UNKNOWN FUNCTION DUF34,229467746,ACQ69518.1,IPR002678
1484479.DI14_01940	DI14_01940	Exiguobacterium sp.	1484479	aliases:GI:640865218,DI14_01940,KDN57298,640865218,KDN57298.1,WP_034809453.1,GTP CYCLOHYDROLASE 1 TYPE 2 HOMOLOG,A0A069EUS1_9BACL,A0A069EUS1
1399115.U719_04385	AHA29139.1	Exiguobacterium sp.	1399115	aliases:EXM:U719_04385,AHA29139,AHA29139.1,GI:557717214,557717214,U719_04385
1397693.KK211187_gene2295	1397693.KK211187_gene2295	Exiguobacterium undae	1397693	aliases:A3783_09295,GTP CYCLOHYDROLASE 1 TYPE 2 HOMOLOG,A0A178KFQ5_9BACL,A0A178KFQ5,KK211187_GENE2295,WP_028106792.1,32083412
5970.XP_009159031.1	5970.XP_009159031.1	Exophiala dermatitidis	5970	aliases:XM_009160783.1,H6C1I0_EXODN,GENEID:20311218,HMPREF1120_06579,XP_009159031,684170320,H6C1I0,XP_009159031.1,GI:684170320,20311218
883110.HMPREF9260_00248	EPH12660.1	Facklamia hominis	883110	aliases:EPH12660.1,HMPREF9260_00248,YBGI/FAMILY DINUCLEAR METAL CENTER PROTEIN,514216999,EPH12660,GI:514216999
883112.HMPREF9707_00653	EKB57144.1	Facklamia ignava	883112	aliases:405583176,K1MM19,GI:405583176,EKB57144.1,YBGI/FAMILY DINUCLEAR METAL CENTER PROTEIN,WP_006701302.1,EKB57144,HMPREF9707_00653,K1MM19_9LACT
883113.HMPREF9708_01493	EHR36232.1	Facklamia languida	883113	aliases:HMPREF9708_01493,EHR36232,GI:374564953,WP_006309726.1,H3NKV4_9LACT,YBGI/FAMILY DINUCLEAR METAL CENTER PROTEIN,EHR36232.1,H3NKV4,374564953
1408438.JADD01000019_gene863	1408438.JADD01000019_gene863	Facklamia sourekii	1408438	aliases:JADD01000019_GENE863
748224.HMPREF9436_00376	EFQ08100.1	Faecalibacterium cf.	748224	aliases:EFQ08100.1,E2ZFE3_9FIRM,E2ZFE3,310624791,INTERPRO:IPR002678,HMPREF9436_00376,GI:310624791,DINUCLEAR METAL CENTER PROTEIN, YBGI FAMILY,EFQ08100,IPR002678
411483.FAEPRAA2165_02851	EEU95591.1	Faecalibacterium prausnitzii	411483	aliases:C7H954_9FIRM,GI:257197307,EEU95591,EEU95591.1,INTERPRO:IPR002678,DINUCLEAR METAL CENTER PROTEIN, YBGI FAMILY,257197307,34753172,WP_005934926.1,C7H954,FAEPRAA2165_02851,IPR002678
657322.FPR_11450	FPR_11450	Faecalibacterium prausnitzii	657322	aliases:FPA:FPR_11450,FPR_11450,CONSERVED HYPOTHETICAL PROTEIN TIGR00486,CBL01466,D4K9F3_9FIRM,295103922,D4K9F3,GI:295103922,CBL01466.1
718252.FP2_14660	FP2_14660	Faecalibacterium prausnitzii	718252	aliases:D4JY55_9FIRM,FP2_14660,D4JY55,GI:295101409,CBK98954,FPR:FP2_14660,CBK98954.1,CONSERVED HYPOTHETICAL PROTEIN TIGR00486,INTERPRO:IPR002678,295101409,UNIPROTKB/TREMBL:D4JY55,IPR002678
1089439.KB902240_gene890	1089439.KB902240_gene890	Fangia hongkongensis	1089439	aliases:KB902240_GENE890
9685.ENSFCAP00000023362	NIF3L1	Felis catus	9685	aliases:XP_023115365,XP_003991061,AANG02154367,UPI000298EAA8,ENSFCAG00000023186,XP_003991061.1,XM_003991012.1,ENSFCAT00000029259,M3X9Q9_FELCA,MDS015,M3X9Q9,NIF3 NGG1 INTERACTING FACTOR 3-LIKE 1 (S. CEREVISIAE),NIF3-LIKE PROTEIN 1,CALS-7,NIF3L1,AANG02154366,FCA:101092874,NIF3-LIKE PROTEIN 1 ISOFORM X1,XM_003991012,NIF3L1-201,ENSFCAP00000023362,ALS2CR1
550540.Fbal_1853	Fbal_1853	Ferrimonas balearica	550540	aliases:WP_013345362.1,FBL:FBAL_1853,ADN76056.1,GI:307631754,307631754,E1SSM7,PROTEIN OF UNKNOWN FUNCTION DUF34,E1SSM7_FERBD,FBAL_1853,ADN76056
1121878.AUGL01000006_gene661	1121878.AUGL01000006_gene661	Ferrimonas futtsuensis	1121878	aliases:AUGL01000006_GENE661
1485544.JQKP01000017_gene616	1485544.JQKP01000017_gene616	Ferriphaselus sp.	1485544	aliases:JQKP01000017_GENE616
589924.Ferp_1715	Ferp_1715	Ferroglobus placidus	589924	aliases:ADC65859.1,ADC65859,INTERPRO:IPR002678,WP_012966198.1,FERP_1715,D3RZE6_FERPA,D3RZE6,288894322,8779241,GI:288894322,PROTEIN OF UNKNOWN FUNCTION DUF34,FPL:FERP_1715,IPR002678
1166018.FAES_2233	FAES_2233	Fibrella aestuarina	1166018	aliases:CCH00242.1,GTP CYCLOHYDROLASE 1 TYPE 2 HOMOLOG,WP_015331341.1,CCH00242,GI:384067032,FAE:FAES_2233,PROTEIN OF UNKNOWN FUNCTION DUF34,384067032,FAES_2233,I0K7Y9,UNIPROTKB/TREMBL:I0K7Y9,I0K7Y9_9BACT
1166018.FAES_4192	FAES_4192	Fibrella aestuarina	1166018	aliases:WP_015333291.1,384068982,FAES_4192,CCH02192.1,I0KDI9,UNIPROTKB/TREMBL:I0KDI9,CCH02192,I0KDI9_9BACT,PROTEIN OF UNKNOWN FUNCTION DUF34,GI:384068982,FAE:FAES_4192
1185876.BN8_04866	BN8_04866	Fibrisoma limi	1185876	aliases:BN8_04866,GTP CYCLOHYDROLASE 1 TYPE 2 HOMOLOG,CCH55597.1,387842489,I2GNW9,GI:387842489,PROTEIN OF UNKNOWN FUNCTION DUF34,I2GNW9_9BACT,CCH55597
1185876.BN8_02937	BN8_02937	Fibrisoma limi	1185876	aliases:CCH53810.1,I2GIT5_9BACT,CCH53810,GI:387845409,WP_009282390.1,PROTEIN OF UNKNOWN FUNCTION DUF34,I2GIT5,387845409,BN8_02937
1185876.BN8_00608	BN8_00608	Fibrisoma limi	1185876	aliases:387847096,CCH51666,I2GCP2_9BACT,BN8_00608,I2GCP2,WP_009280252.1,UPF0135 PROTEIN,CCH51666.1,GI:387847096
59374.Fisuc_2787	FSU_0039	Fibrobacter succinogenes	59374	aliases:FSU_0039,WP_014544906.1,INTERPRO:IPR002678,34754026,FSU:FISUC_2787,C9RNB8,FISUC_2787,261373625,PROTEIN OF UNKNOWN FUNCTION DUF34,GI:261373625,C9RNB8_FIBSS,ACX76370,ACX76370.1,IPR002678
59894.ENSFALP00000004326	NIF3L1	Ficedula albicollis	59894	aliases:XP_005049245.1,NIF3 NGG1 INTERACTING FACTOR 3-LIKE 1 (S. CEREVISIAE),UPI000391EC85,NGG1 INTERACTING FACTOR 3 LIKE 1,ENSFALG00000004149,FAB:101817223,NIF3L1-201,CALS-7,MDS015,XM_005049188,NIF3L1,XM_005049188.1,NIF3-LIKE PROTEIN 1,ENSFALP00000004326,U3JNH2_FICAL,ALS2CR1,XP_005049245,U3JNH2,ENSFALT00000004347
546269.HMPREF0389_00520	EFE28603.1	Filifactor alocis	546269	aliases:291166557,D6GSG2,FAA:HMPREF0389_00520,EFE28603,GI:291166557,DINUCLEAR METAL CENTER PROTEIN, YBGI FAMILY,WP_014261792.1,D6GSG2_FILAD,EFE28603.1,HMPREF0389_00520,NIF3 FAMILY PROTEIN
661478.OP10G_3592	OP10G_3592	Fimbriimonas ginsengisoli	661478	aliases:GTP CYCLOHYDROLASE 1 TYPE 2 HOMOLOG,OP10G_3592,663074805,AIE86960.1,GI:663074805,FGI:OP10G_3592,A0A068NW02_9BACT,A0A068NW02,AIE86960
661478.OP10G_3030	OP10G_3030	Fimbriimonas ginsengisoli	661478	aliases:663074243,OP10G_3030,FGI:OP10G_3030,A0A068NS69,AIE86398.1,GI:663074243,A0A068NS69_9BACT,AIE86398
525282.HMPREF0391_11566	EFH92594.1	Finegoldia magna	525282	aliases:D6SAU4_FINMA,297573873,EFH92594,WP_002836497.1,GI:297573873,DINUCLEAR METAL CENTER PROTEIN, YBGI FAMILY,D6SAU4,HMPREF0391_11566,EFH92594.1
334413.FMG_0821	FMG_0821	Finegoldia magna	334413	aliases:GI:167831323,FMA:FMG_0821,B0S1J9_FINM2,WP_012290647.1,167831323,BAG08239,BAG08239.1,34165735,FMG_0821,B0S1J9
1378168.N510_02412	N510_02412	Firmicutes bacterium	1378168	aliases:ESL13422,V2YCV1,554968621,ESL13422.1,YBGI/FAMILY DINUCLEAR METAL CENTER PROTEIN,GI:554968621,V2YCV1_9FIRM,N510_02412,WP_023348106.1
306281.AJLK01000087_gene2423	306281.AJLK01000087_gene2423	Fischerella muscicola	306281	aliases:AJLK01000087_GENE2423
1173023.KE650771_gene1202	1173023.KE650771_gene1202	Fischerella sp.	1173023	aliases:KE650771_GENE1202
1173024.KI912148_gene4449	1173024.KI912148_gene4449	Fischerella sp.	1173024	aliases:KI912148_GENE4449
1174528.JH992898_gene5556	1174528.JH992898_gene5556	Fischerella sp.	1174528	aliases:JH992898_GENE5556
98439.AJLL01000010_gene1375	98439.AJLL01000010_gene1375	Fischerella thermalis	98439	aliases:AJLL01000010_GENE1375
1380600.AUYN01000009_gene1768	1380600.AUYN01000009_gene1768	Flaviramulus ichthyoenteri	1380600	aliases:AUYN01000009_GENE1768
487796.Flav2ADRAFT_1220	EEG41912.1	Flavobacteria bacterium	487796	aliases:GTP CYCLOHYDROLASE 1 TYPE 2 HOMOLOG,EEG41912,INTERPRO:IPR002678,C0BFQ9_FLABM,C0BFQ9,EEG41912.1,FLAV2ADRAFT_1220,225003940,WP_008865242.1,PROTEIN OF UNKNOWN FUNCTION DUF34,IPR002678,GI:225003940
391598.FBBAL38_08395	EAZ95707.1	Flavobacteria bacterium	391598	aliases:FBBAL38_08395,WP_008256600.1,EAZ95707.1,EAZ95707,A3J4X0_9FLAO,126625017,A3J4X0,GI:126625017,GTP CYCLOHYDROLASE 1 TYPE 2 HOMOLOG
1042376.AFPK01000063_gene1101	1042376.AFPK01000063_gene1101	Flavobacteriaceae bacterium	1042376	aliases:AFPK01000063_GENE1101
980584.AFPB01000152_gene396	980584.AFPB01000152_gene396	Flavobacteriaceae bacterium	980584	aliases:AFPB01000152_GENE396
531844.FIC_01347	FIC_01347	Flavobacteriaceae bacterium	531844	aliases:GI:255341682,GTP CYCLOHYDROLASE 1 TYPE 2 HOMOLOG,FIC_01347,FBA:FIC_01347,ACU07795,ACU07795.1,WP_015806080.1,255341682,HYPOTHETICAL PROTEIN YBGI,C6X5V7_FLAB3,C6X5V7
391603.FBALC1_03697	EDP71557.1	Flavobacteriales bacterium	391603	aliases:GTP CYCLOHYDROLASE 1 TYPE 2 HOMOLOG,FBALC1_03697,EDP71557,159877500,EDP71557.1,GI:159877500,A8UKB6_9FLAO,WP_008270657.1,A8UKB6
1111730.ATTM01000001_gene1779	1111730.ATTM01000001_gene1779	Flavobacterium antarcticum	1111730	aliases:ATTM01000001_GENE1779
1453498.LG45_08430	LG45_08430	Flavobacterium aquatile	1453498	aliases:LG45_08430,GTP CYCLOHYDROLASE 1 TYPE 2 HOMOLOG,A0A095U0Z8_9FLAO,GI:687223112,A0A095U0Z8,NGG1P INTERACTING FACTOR 3 PROTEIN, NIF3,KGD68303.1,687223112,KGD68303,WP_035126021.1
1406840.Q763_01020	Q763_01020	Flavobacterium beibuense	1406840	aliases:GTP CYCLOHYDROLASE 1 TYPE 2 HOMOLOG,WP_035130103.1,KGO84359,A0A0A2LWH7,700536863,GI:700536863,KGO84359.1,NGG1P INTERACTING FACTOR 3 PROTEIN, NIF3,Q763_01020,A0A0A2LWH7_9FLAO
1034807.FBFL15_2145	yqfO	Flavobacterium branchiophilum	1034807	aliases:CCB70168.1,GTP CYCLOHYDROLASE 1 TYPE 2 HOMOLOG,345530138,WP_014084630.1,FBR:FBFL15_2145,GI:345530138,PROTEIN OF UNKNOWN FUNCTION YQFO,FBFL15_2145,YQFO,G2Z2J6,CCB70168,G2Z2J6_FLABF
1453505.JASY01000008_gene624	1453505.JASY01000008_gene624	Flavobacterium chungangense	1453505	aliases:JASY01000008_GENE624
1041826.FCOL_01100	FCOL_01100	Flavobacterium columnare	1041826	aliases:GTP CYCLOHYDROLASE 1 TYPE 2 HOMOLOG,AEW85069.1,G8X918,34302659,WP_014164350.1,G8X918_FLACA,365735976,AEW85069,GI:365735976,FCO:FCOL_01100,FCOL_01100
1121887.AUDK01000004_gene370	RCH33_1844	Flavobacterium daejeonense	1121887	aliases:A0A0Q0S917_9FLAO,AUDK01000004_GENE370,GTP CYCLOHYDROLASE 1 TYPE 2 HOMOLOG,A0A0Q0S917,RCH33_1844,WP_055093369.1
1107311.Q767_01230	Q767_01230	Flavobacterium enshiense	1107311	aliases:GI:700550378,GTP CYCLOHYDROLASE 1 TYPE 2 HOMOLOG,Q767_01230,KGO97255.1,V6SCX5_9FLAO,NGG1P INTERACTING FACTOR 3 PROTEIN, NIF3,KGO97255,WP_023574189.1,700550378,V6SCX5
1121889.AUDM01000015_gene2032	1121889.AUDM01000015_gene2032	Flavobacterium filum	1121889	aliases:AUDM01000015_GENE2032
1121890.AUDO01000001_gene821	1121890.AUDO01000001_gene821	Flavobacterium frigidarium	1121890	aliases:AUDO01000001_GENE821
1086011.HJ01_00208	HJ01_00208	Flavobacterium frigoris	1086011	aliases:HJ01_00208,GTP CYCLOHYDROLASE 1 TYPE 2 HOMOLOG,EIA10468,H7FM10,H7FM10_9FLAO,379651908,GI:379651908,WP_007136385.1,EIA10468.1
991.IW20_04530	IW20_04530	Flavobacterium hydatis	991	aliases:A0A086ANA9_FLAHY,GTP CYCLOHYDROLASE 1 TYPE 2 HOMOLOG,671233187,KFF18173.1,NGG1P INTERACTING FACTOR 3 PROTEIN, NIF3,31863393,GI:671233187,KFF18173,IW20_04530,WP_035619380.1,A0A086ANA9
1094466.KQS_10675	yqfO	Flavobacterium indicum	1094466	aliases:380503019,GTP CYCLOHYDROLASE 1 TYPE 2 HOMOLOG,FIN:KQS_10675,H8XVU7_FLAIG,KQS_10675,WP_014389179.1,CCG54061,YQFO,CCG54061.1,PROTEIN OF UNKNOWN FUNCTION YQFO,GI:380503019,H8XVU7
376686.Fjoh_0233	Fjoh_0233	Flavobacterium johnsoniae	376686	aliases:GTP CYCLOHYDROLASE 1 TYPE 2 HOMOLOG,IPR002678,WP_012022341.1,GI:146152416,INTERPRO:IPR002678,31763097,FJO:FJOH_0233,ABQ03270,A5FNE9_FLAJ1,A5FNE9,PROTEIN OF UNKNOWN FUNCTION DUF34,146152416,FJOH_0233,ABQ03270.1
1341181.FLJC2902T_28890	ESU26402.1	Flavobacterium limnosediminis	1341181	aliases:GTP CYCLOHYDROLASE 1 TYPE 2 HOMOLOG,V6SJG4,ESU26402.1,GI:558899145,FLJC2902T_28890,ESU26402,V6SJG4_9FLAO,558899145,WP_023580435.1
402612.FP1219	yqfO	Flavobacterium psychrophilum	402612	aliases:FP1219,GI:149771828,CAL43302.1,A6GYX9_FLAPJ,GOA:A6GYX9,149771828,UNIPROTKB/TREMBL:A6GYX9,IPR017221,PROTEIN OF UNKNOWN FUNCTION YQFO,CAL43302,AIG30011,GTP CYCLOHYDROLASE 1 TYPE 2 HOMOLOG,YP_001296113.1,IPR002678,WP_011963351.1,INTERPRO:IPR002678,YQFO,5299430,FPV:IA03_05830,A6GYX9,INTERPRO:IPR017221
362418.IW19_06110	IW19_06110	Flavobacterium reichenbachii	362418	aliases:IW19_06110,GTP CYCLOHYDROLASE 1 TYPE 2 HOMOLOG,A0A085ZL16,A0A085ZL16_9FLAO,NGG1P INTERACTING FACTOR 3 PROTEIN, NIF3,GI:671219991,671219991,WP_035682227.1,KFF05130,KFF05130.1
1121895.Q765_18170	Q765_18170	Flavobacterium rivuli	1121895	aliases:GI:700537711,700537711,GTP CYCLOHYDROLASE 1 TYPE 2 HOMOLOG,A0A0A2LYI0_9FLAO,Q765_18170,KGO85069,A0A0A2LYI0,KGO85069.1,WP_020212030.1,NGG1P INTERACTING FACTOR 3 PROTEIN, NIF3
1341155.FSS13T_21500	ESU23846.1	Flavobacterium saliperosum	1341155	aliases:FSS13T_21500,ESU23846.1,ESU23846,558896537,GI:558896537,GTP CYCLOHYDROLASE 1 TYPE 2 HOMOLOG,SAMN02927925_01547,A0A1G4VQF8,WP_023577150.1,A0A1G4VQF8_9FLAO
1121896.JMLU01000003_gene2189	1121896.JMLU01000003_gene2189	Flavobacterium sasangense	1121896	aliases:JMLU01000003_GENE2189
1121897.AUGO01000002_gene2352	1121897.AUGO01000002_gene2352	Flavobacterium soli	1121897	aliases:AUGO01000002_GENE2352
1270193.JARP01000003_gene2041	1270193.JARP01000003_gene2041	Flavobacterium sp.	1270193	aliases:JARP01000003_GENE2041
1229487.AMYW01000002_gene1473	1229487.AMYW01000002_gene1473	Flavobacterium sp.	1229487	aliases:AMYW01000002_GENE1473
1202532.FF52_08214	FF52_08214	Flavobacterium sp.	1202532	aliases:GTP CYCLOHYDROLASE 1 TYPE 2 HOMOLOG,FF52_08214,EJG01977,32308167,GI:395436038,J0RSF8_9FLAO,WP_008464526.1,395436038,J0RSF8,EJG01977.1
1189620.AJXL01000026_gene3412	1189620.AJXL01000026_gene3412	Flavobacterium sp.	1189620	aliases:AJXL01000026_GENE3412
1492737.FEM08_34670	KFC57752.1	Flavobacterium sp.	1492737	aliases:A0A085EEV7_9FLAO,KFC57752.1,FEM08_34670,GTP CYCLOHYDROLASE 1 TYPE 2 HOMOLOG,DINUCLEAR METAL CENTER PROTEIN, YBGI/SA1388 FAMILY,AOW08054,A0A085EEV7,INTERPRO:IPR002678,GI:668934588,668934588,FGL:EM308_00185,KFC57752,WP_035640898.1,IPR002678
1492738.FEM21_26030	KDN54352.1	Flavobacterium sp.	1492738	aliases:640827985,FEM21_26030,GI:640827985,KDN54352,INTERPRO:IPR002678,KDN54352.1,GTP CYCLOHYDROLASE 1 TYPE 2 HOMOLOG,A0A066WK42,WP_035660980.1,A0A066WK42_9FLAO,IPR002678
1131812.JQMS01000001_gene187	1131812.JQMS01000001_gene187	Flavobacterium sp.	1131812	aliases:JQMS01000001_GENE187
1144313.PMI10_00429	EJL66850.1	Flavobacterium sp.	1144313	aliases:J2JFT4_FLASC,GI:398075744,EJL66850,GTP CYCLOHYDROLASE 1 TYPE 2 HOMOLOG,DINUCLEAR METAL CENTER PROTEIN, YBGI/SA1388 FAMILY,INTERPRO:IPR017221,INTERPRO:IPR002678,EJL66850.1,J2JFT4,IPR017221,PMI10_00429,398075744,WP_007803975.1,IPR002678
1506583.JQJY01000005_gene2252	1506583.JQJY01000005_gene2252	Flavobacterium sp.	1506583	aliases:JQJY01000005_GENE2252
1121898.Q766_09195	Q766_09195	Flavobacterium subsaxonicum	1121898	aliases:WP_026990994.1,GTP CYCLOHYDROLASE 1 TYPE 2 HOMOLOG,A0A0A2MPQ2_9FLAO,KGO93458,A0A0A2MPQ2,NGG1P INTERACTING FACTOR 3 PROTEIN, NIF3,Q766_09195,KGO93458.1,700546481,GI:700546481
1450525.JATV01000007_gene1213	1450525.JATV01000007_gene1213	Flavobacterium succinicans	1450525	aliases:GTP CYCLOHYDROLASE 1 TYPE 2 HOMOLOG,WP_024981290.1,A0A1I4XA28,SAMN05444143_108102,A0A1I4XA28_9FLAO,JATV01000007_GENE1213
1121899.Q764_04205	Q764_04205	Flavobacterium suncheonense	1121899	aliases:Q764_04205,GTP CYCLOHYDROLASE 1 TYPE 2 HOMOLOG,KGO90265,700543101,NGG1P INTERACTING FACTOR 3 PROTEIN, NIF3,A0A0A2MPS6_9FLAO,WP_026981249.1,A0A0A2MPS6,GI:700543101,KGO90265.1
929703.KE386491_gene2545	929703.KE386491_gene2545	Flectobacillus major	929703	aliases:KE386491_GENE2545
880071.Fleli_4018	Fleli_4018	Flexibacter litoralis	880071	aliases:I4AQT3_BERLS,WP_014799741.1,DINUCLEAR METAL CENTER PROTEIN, YBGI/SA1388 FAMILY,AFM06318.1,390530588,INTERPRO:IPR002678,FLELI_4018,FLI:FLELI_4018,I4AQT3,GI:390530588,AFM06318,IPR002678
717231.Flexsi_0997	AEI14656.1	Flexistipes sinusarabici	717231	aliases:F8E5M5_FLESM,GTP CYCLOHYDROLASE 1 TYPE 2 HOMOLOG,INTERPRO:IPR017221,WP_013886146.1,INTERPRO:IPR002678,FSI:FLEXSI_0997,NGG1P INTERACTING FACTOR 3 PROTEIN, NIF3,F8E5M5,FLEXSI_0997,IPR017221,GI:336106838,AEI14656.1,IPR002678,336106838,AEI14656
1121904.ARBP01000001_gene5683	1121904.ARBP01000001_gene5683	Flexithrix dorotheae	1121904	aliases:ARBP01000001_GENE5683
1121904.ARBP01000009_gene4217	1121904.ARBP01000009_gene4217	Flexithrix dorotheae	1121904	aliases:ARBP01000009_GENE4217
1094715.CM001373_gene711	Ldum_2926	Fluoribacter dumoffii	1094715	aliases:PUTATIVE NIF3-LIKE PROTEIN 1,CM001373_GENE711,A0A0W0SZH1,LDUM_2926,A0A0W0SZH1_9GAMM
755732.Fluta_2851	Fluta_2851	Fluviicola taffensis	755732	aliases:GI:327320338,GTP CYCLOHYDROLASE 1 TYPE 2 HOMOLOG,FLUTA_2851,AEA44830,FTE:FLUTA_2851,F2IHQ2,NGG1P INTERACTING FACTOR 3 PROTEIN, NIF3,AEA44830.1,WP_013687599.1,327320338,F2IHQ2_FLUTR
40483.S8EEQ2	40483.S8EEQ2	Fomitopsis pinicola	40483	aliases:FOMPIDRAFT_1116020,S8EEQ2,S8EEQ2_FOMPI
691883.XP_009492183.1	H696_00077	Fonticula alba	691883	aliases:XP_009492183.1,99734,GENEID:20524801,A0A058ZG94,691883,249636,CDD:249636,CDD:99734,GI:694524543,H696_00077,TAXON:691883,GI:694524540,GENEID:20524802,694524540,20524802,20524801,694524543,XM_009493908.1,XP_009492183,A0A058ZG94_9EUKA
1347342.BN863_5110	BN863_5110	Formosa agariphila	1347342	aliases:T2KIG4_9FLAO,GOA:T2KIG4,CDF78223,DINUCLEAR METAL CENTER PROTEIN,INTERPRO:IPR017221,INTERPRO:IPR002678,537740580,GTP CYCLOHYDROLASE 1 TYPE 2 HOMOLOG,UNIPROTKB/TREMBL:T2KIG4,WP_038527148.1,CDF78223.1,T2KIG4,IPR002678,GI:537740580,IPR017221,BN863_5110
1137281.D778_00768	D778_00768	Formosa sp.	1137281	aliases:M7MI15_9FLAO,GTP CYCLOHYDROLASE 1 TYPE 2 HOMOLOG,D778_00768,GI:469824413,469824413,EMQ94485,M7MI15,EMQ94485.1,WP_007650594.1
676032.FN3523_0797	AEB28654.1	Francisella cf.	676032	aliases:FN3523_0797,AEB28654.1,FCN:FN3523_0797,AEB28654,WP_014548104.1,F4BKG0,GI:328675979,F4BKG0_FRACN,328675979
1163389.OOM_1697	OOM_1697	Francisella noatunensis	1163389	aliases:GI:386872050,I2B0W0,AFJ44057,386872050,OOM_1697,WP_014715582.1,AFJ44057.1,FNA:OOM_1697,I2B0W0_FRANT
484022.Fphi_0035	Fphi_0035	Francisella philomiragia	484022	aliases:ABZ86255.1,ABZ86255,167596257,AJI47738,29665934,B0TXT6_FRAP2,GI:167596257,WP_012279596.1,FPI:BF30_205,B0TXT6,FPHI_0035
573569.F7308_1205	F7308_1205	Francisella sp.	573569	aliases:F7308_1205,AEI36131,GI:336446825,WP_013922965.1,FRT:F7308_1205,F8G6Y8_FRAST,F8G6Y8,336446825,AEI36131.1
1547445.LO80_02135	LO80_02135	Francisella sp.	1547445	aliases:AIT08893,LO80_02135,A0A097EMW0,FRF:LO80_02135,AIT08893.1,WP_040008131.1,A0A097EMW0_9GAMM,METAL-BINDING PROTEIN,GI:695167570,695167570
1385420.FRA_24c01180	KEI36032.1	Francisella sp.	1385420	aliases:FRA_24C01180,KEI36032,A0A073AAC9_9GAMM,WP_035718791.1,658161146,HYPOTHETICAL PROTEIN YBGI,A0A073AAC9,KEI36032.1,GI:658161146
326424.FRAAL2219	FRAAL2219	Frankia alni	326424	aliases:FAL:FRAAL2219,Q0RNL8_FRAAA,FRAAL2219,UNIPROTKB/TREMBL:Q0RNL8,Q0RNL8,CAJ60868.1,111149185,INTERPRO:IPR002678,CAJ60868,GI:111149185,IPR002678
222534.KB893671_gene3330	222534.KB893671_gene3330	Frankia sp.	222534	aliases:KB893671_GENE3330
710111.FraQA3DRAFT_2834	EIV93154.1	Frankia sp.	710111	aliases:EIV93154,GI:392287130,DINUCLEAR METAL CENTER PROTEIN, YBGI/SA1388 FAMILY,INTERPRO:IPR002678,EIV93154.1,FRAQA3DRAFT_2834,I8QT14_9ACTN,392287130,I8QT14,IPR002678
298655.KI912266_gene5031	298655.KI912266_gene5031	Frankia sp.	298655	aliases:KI912266_GENE5031
365528.KB891102_gene4393	365528.KB891102_gene4393	Frankia sp.	365528	aliases:KB891102_GENE4393
1283283.ATXA01000012_gene4861	1283283.ATXA01000012_gene4861	Frankia sp.	1283283	aliases:ATXA01000012_GENE4861
298653.Franean1_5076	ABW14435.1	Frankia sp.	298653	aliases:ABW14435,GI:158112238,ABW14435.1,FRE:FRANEAN1_5076,158112238,INTERPRO:IPR002678,A8KZ79_FRASN,FRANEAN1_5076,PROTEIN OF UNKNOWN FUNCTION DUF34,WP_020462550.1,A8KZ79,IPR002678
298654.FraEuI1c_3526	ADP81535.1	Frankia sp.	298654	aliases:ADP81535.1,ADP81535,E3IZA8_FRAIE,INTERPRO:IPR002678,WP_013424653.1,E3IZA8,FRI:FRAEUI1C_3526,311228680,PROTEIN OF UNKNOWN FUNCTION DUF34,FRAEUI1C_3526,IPR002678,GI:311228680
106370.Francci3_1436	ABD10813.1	Frankia sp.	106370	aliases:GI:86567004,ABD10813,ABD10813.1,INTERPRO:IPR002678,Q2JD29_FRACC,Q2JD29,GTP CYCLOHYDROLASE 1 TYPE 2 HOMOLOG,PROTEIN OF UNKNOWN FUNCTION DUF34,FRA:FRANCCI3_1436,FRANCCI3_1436,86567004,IPR002678
656024.FsymDg_3037	AEH10349.1	Frankia symbiont	656024	aliases:F8AXJ8_FRADG,FSY:FSYMDG_3037,AEH10349,FSYMDG_3037,NGG1P INTERACTING FACTOR 3 PROTEIN, NIF3,F8AXJ8,GTP CYCLOHYDROLASE 1 TYPE 2 HOMOLOG,334859875,GI:334859875,INTERPRO:IPR002678,AEH10349.1,IPR002678
930946.AEOP01000020_gene1090	930946.AEOP01000020_gene1090	Fructobacillus fructosus	930946	aliases:IV71_GL000650,A0A0R2HTD2_9LACT,A0A0R2HTD2,AEOP01000020_GENE1090,WP_010691729.1
885580.XP_010615866.1	Nif3l1	Fukomys damarensis	885580	aliases:731201806,731201804,731201802,731201800,H920_02348,XP_010615866,XP_010615866.1,GI:731201800,GI:731201802,104857577,GI:731201804,GI:731201806,104857578,XP_010615868.1,XP_010615869.1,TAXON:885580,A0A091E0Q7_FUKDA,885580,PUTATIVE GTP CYCLOHYDROLASE 1 TYPE 2 NIF3L1,GENEID:104857577,GENEID:104857578,XP_010615870.1,XM_010617570.1,NIF3-LIKE PROTEIN 1,XP_010615874.1,NIF3L1,731201797,A0A091E0Q7,XP…
1237149.C900_04750	C900_04750	Fulvivirga imtechensis	1237149	aliases:GTP CYCLOHYDROLASE 1 TYPE 2 HOMOLOG,WP_009578120.1,GI:441439946,ELR73239,441439946,ELR73239.1,C900_04750,L8JZZ1,L8JZZ1_9BACT
5127.CCT67349	LW93_8714	Fusarium fujikuroi	5127	aliases:UPI000351EE8C,LW93_8714,S0DXQ4,3.5.4.16,FFUJ_13556,UPA00848,RELATED TO NGG1P-INTERACTING FACTOR 3,A0A0J0A6G8_GIBFU,NGG1P-INTERACTING FACTOR 3,HF679026.1:CDS:COMPLEMENT(JOIN(1767655..1768310,1768368..1768617)),CCT67349,A0A0J0A6G8,CCT67349.1
5518.FGSG_06319P0	FG06319.1	Fusarium graminearum	5518	aliases:XM_386495.1,UPI000023CF17,XM_386495,FG06319.1,A0A1C3YK39_GIBZE,FGSG_06319,XP_386495.1,XP_011324973,I1RQH6,FGR:FGSG_06319,FGSG_06319T0,XP_386495,A0A1C3YK39,FGRAMPH1_01T20025,FGSG_06319P0
5507.FOXG_08071P0	FOQG_02725	Fusarium oxysporum	5507	aliases:X0D364_FUSOX,UPI00021ED6D9,J9MYS7,XP_018244000,X0D364,FOX:FOXG_08071,PWY-6147,UPA00848,FOXG_08071,FOXG_08071T0,PWY-6983,PWY-5664,PWY-6703,FOQG_02725,PWY-5663,FOXG_08071P0
101028.EKJ78686	FPSE_01174	Fusarium pseudograminearum	101028	aliases:K3V0K4,XP_009252569.1,EKJ78686.1,3.5.4.16,FPSE_01174,AFNW01000025.1:CDS:COMPLEMENT(JOIN(187811..188466,188525..188774)),PWY-5663,EKJ78686,UPA00848,AFNW01000025.1:MRNA:COMPLEMENT(JOIN(<187811..188466,188525..>188774)),PWY-6147,FPU:FPSE_01174,PWY-7442,PWY-6983,K3V0K4_FUSPC,PWY-5664,PWY-6703,20359794,XP_009252569,UPI00028EEF2F
117187.FVEG_04993T0	FVEG_04993	Fusarium verticillioides	117187	aliases:W7LY91,XP_018749767,W7LY91_GIBM7,FVR:FVEG_04993,30063016,FVEG_04993,XP_018749767.1,FVEG_04993T0,UPI00021F095E
469615.FGAG_01370	EFS29049.1	Fusobacterium gonidiaformans	469615	aliases:EFS29049,313692214,GI:313692214,DINUCLEAR METAL CENTER PROTEIN, YBGI FAMILY,FGAG_01370,EFS29049.1
469616.FMAG_02388	FMAG_02388	Fusobacterium mortiferum	469616	aliases:EEO36826.1,C3WG20_FUSMR,GI:229421779,EEO36826,FMAG_02388,DINUCLEAR METAL CENTER PROTEIN, YBGI FAMILY,C3WG20,WP_005885980.1,229421779
1095747.HMPREF1049_1658	EIJ71701.1	Fusobacterium necrophorum	1095747	aliases:HMPREF1049_1658,EIJ71701,WP_005956039.1,A0A162J431_9FUSO,EIJ71701.1,GI:386906981,A2J07_08540,NIF3-LIKE DINUCLEAR METAL CENTER HEXAMERIC PROTEIN,386906981,DINUCLEAR METAL CENTER PROTEIN, YBGI FAMILY,31519709,A0A162J431
556263.FSEG_01672	EFS24065.1	Fusobacterium necrophorum	556263	aliases:FSEG_01672,DINUCLEAR METAL CENTER PROTEIN, YBGI/SA1388 FAMILY,GI:313687230,A0A1G6D2L3_9FUSO,EFS24065,DINUCLEAR METAL CENTER PROTEIN, YBGI FAMILY,WP_035900282.1,313687230,SAMN02983009_01897,A0A1G6D2L3,EFS24065.1
1216362.B437_06927	B437_06927	Fusobacterium nucleatum	1216362	aliases:B437_06927,WP_005917923.1,EJU07388.1,402256912,GI:402256912,J8VHI8,J8VHI8_9FUSO,NGG1-INTERACTING FACTOR 3,EJU07388
393480.FNP_0467	FNP_0467	Fusobacterium nucleatum	393480	aliases:EDK88276,NIF3 FAMILY PROTEIN,FNP_0467,GI:148323026,EDK88276.1,A5TTQ1,148323026,WP_005896137.1,A5TTQ1_FUSNP
190304.FN1316	FN1316	Fusobacterium nucleatum	190304	aliases:NP_604213.1,GI:19714955,WP_005902529.1,AAL95512.1,Q8RE15_FUSNN,AAL95512,992174,NGG1-INTERACTING FACTOR 3,NP_604213,Q8RE15,19714955,FNU:FN1316,FN1316
469604.HMPREF0946_00775	EEU32702.1	Fusobacterium nucleatum	469604	aliases:FNC:HMPREF0946_00775,HMPREF0946_00775,GI:256719147,256719147,EEU32702.1,YBGI/FAMILY DINUCLEAR METAL CENTER PROTEIN,C7XNV1_FUSNV,WP_005891124.1,31730657,EEU32702,C7XNV1
457405.FSDG_00144	FSDG_00144	Fusobacterium nucleatum	457405	aliases:WP_008700052.1,EEO41585,EEO41585.1,FSDG_00144,23370136,YBGI/FAMILY DINUCLEAR METAL CENTER PROTEIN,229431373,A0A140PPH7_FUSNU,A0A140PPH7,FNE:FSDG_00144,GI:229431373
1408287.AXUR01000022_gene304	1408287.AXUR01000022_gene304	Fusobacterium nucleatum	1408287	aliases:A0A133NTE0,A0A133NTE0_FUSNU,AXUR01000022_GENE304,DINUCLEAR METAL CENTER PROTEIN, YBGI FAMILY,HMPREF3221_01395,WP_060798505.1
469606.FSCG_00882	FSCG_00882	Fusobacterium nucleatum	469606	aliases:YBGI/FAMILY DINUCLEAR METAL CENTER PROTEIN,229429957,FSCG_00882,GI:229429957,EEO40169.1,WP_005891124.1,DINUCLEAR METAL CENTER PROTEIN, YBGI FAMILY,EEO40169,A0A0M1VUR2_FUSNV,31730657,A0A0M1VUR2
1408439.JHXW01000004_gene1299	1408439.JHXW01000004_gene1299	Fusobacterium perfoetens	1408439	aliases:JHXW01000004_GENE1299
546275.FUSPEROL_02460	EFE85639.1	Fusobacterium periodonticum	546275	aliases:D4CYE6_9FUSO,291378121,WP_005975621.1,ATV56422,FUSPEROL_02460,INTERPRO:IPR002678,EFE85639,EFE85639.1,FPD:CTM68_01020,DINUCLEAR METAL CENTER PROTEIN, YBGI FAMILY,D4CYE6,GI:291378121,IPR002678
1278306.KB906916_gene1146	1278306.KB906916_gene1146	Fusobacterium russii	1278306	aliases:KB906916_GENE1146
861452.HMPREF9093_02094	EHI76367.1	Fusobacterium sp.	861452	aliases:G6C691_9FUSO,INTERPRO:IPR002678,EHI76367,EHI76367.1,DINUCLEAR METAL CENTER PROTEIN, YBGI FAMILY,G6C691,357066211,WP_009424616.1,GI:357066211,IPR002678,HMPREF9093_02094
469617.FUAG_03108	FUAG_03108	Fusobacterium ulcerans	469617	aliases:EFS27593,EFS27593.1,GI:313690758,V9HCA1_9FUSO,YBGI/FAMILY DINUCLEAR METAL CENTER PROTEIN,FUAG_03108,WP_005982474.1,V9HCA1,313690758
469618.FVAG_02806	FVAG_02806	Fusobacterium varium	469618	aliases:C6JI08,WP_005950399.1,EES65239.1,C6JI08_FUSVA,GI:251836705,EES65239,DINUCLEAR METAL CENTER PROTEIN, YBGI FAMILY,FVAG_02806,251836705
8049.ENSGMOP00000018100	8049.ENSGMOP00000018100	Gadus morhua	8049	aliases:ENSGMOP00000018100,ENSGMOT00000018547,ZGC:110030,UPI00023F38B7,NIF3L1-201,NIF3L1,ENSGMOG00000016857,GMR.8760,IM:6900987,NIF3 NGG1 INTERACTING FACTOR 3-LIKE 1 (S. CEREVISIAE)
29850.GGTG_05455T0	GGTG_05455	Gaeumannomyces graminis	29850	aliases:J3NVZ2_GAGT3,J3NVZ2,GGTG_05455T0,GGTG_05455,UPI00025393AA,XP_009221522.1,EJT75522.1,20345913
555500.I215_04975	I215_04975	Galbibacter marinus	555500	aliases:407744308,GTP CYCLOHYDROLASE 1 TYPE 2 HOMOLOG,K2QM27_9FLAO,EKF55877,EKF55877.1,GI:407744308,K2QM27,I215_04975,WP_008990867.1
482537.XP_008580333.1	NIF3L1	Galeopterus variegatus	482537	aliases:GENEID:103598156,GENEID:103598157,CDD:238909,PUTATIVE GTP CYCLOHYDROLASE 1 TYPE 2 NIF3L1 ISOFORM X1,GI:667298581,482537,103598157,103598156,GI:667298575,667298578,XP_008580333,238909,667298581,TAXON:482537,XM_008582115.1,GI:667298578,667298575,XP_008580333.1,NIF3L1
745411.B3C1_13089	B3C1_13089	Gallaecimonas xiamenensis	745411	aliases:K2J7L9_9GAMM,K2J7L9,EKE70932,EKE70932.1,WP_008485381.1,GI:407200929,407200929,B3C1_13089
1005058.UMN179_01860	AEC17875.1	Gallibacterium anatis	1005058	aliases:10565125,WP_013746642.1,PUTATIVE HYDROLASE-OXIDASE,F4HDI5_GALAU,UMN179_01860,F4HDI5,330432816,GI:330432816,GAN:UMN179_01860,AEC17875.1,AEC17875
155515.JP36_02555	JP36_02555	Gallibacterium genomosp.	155515	aliases:JP36_02555,GI:702410024,KGQ38541,METAL-BINDING PROTEIN,702410024,A0A0A2Y1M6_9PAST,WP_039171614.1,A0A0A2Y1M6,KGQ38541.1
395494.Galf_0446	Galf_0446	Gallionella capsiferriformans	395494	aliases:WP_013292433.1,IPR002678,D9SC25,INTERPRO:IPR002678,ADL54490,GCA:GALF_0446,ADL54490.1,PROTEIN OF UNKNOWN FUNCTION DUF34,GI:302580479,GALF_0446,302580479,D9SC25_GALCS
9031.ENSGALP00000013373	NIF3L1	Gallus gallus	9031	aliases:XP_004942661.1,XM_421932,424076,XP_421932,F1NDR9_CHICK,ENSGALG00000008226,XM_004942604,MDS015,F1NDR9,XP_421932.3,ENSGALP00000013373,GGA:424076,NIF3 NGG1 INTERACTING FACTOR 3-LIKE 1 (S. CEREVISIAE),UPI000240BC7A,NIF3-LIKE PROTEIN 1,XM_421932.4,NIF3L1-201,CALS-7,NIF3L1,XP_004942661,NGG1 INTERACTING FACTOR 3 LIKE 1,XM_004942604.1,AADN03005407,ENSGALT00000013388,ALS2CR1
1229485.AMYV01000058_gene4227	1229485.AMYV01000058_gene4227	gamma proteobacterium	1229485	aliases:AMYV01000058_GENE4227
1168065.DOK_14194	DOK_14194	gamma proteobacterium	1168065	aliases:WP_008251615.1,I2JGL0_9GAMM,I2JGL0,EIF42112,EIF42112.1,DOK_14194,GI:385278140,385278140
83406.HDN1F_06460	CBL44229.1	gamma proteobacterium	83406	aliases:WP_013260732.1,CBL44229.1,E1VHD7_9GAMM,301796025,PROTEIN OF UNKNOWN FUNCTION DUF34,UNIPROTKB/TREMBL:E1VHD7,INTERPRO:IPR002678,HDN1F_06460,E1VHD7,CBL44229,GI:301796025,GPB:HDN1F_06460,IPR002678
391615.ABSJ01000055_gene1371	391615.ABSJ01000055_gene1371	gamma proteobacterium	391615	aliases:GP5015_1106,B5JRP0,ABSJ01000055_GENE1371,B5JRP0_9GAMM
751994.AGIG01000007_gene1366	751994.AGIG01000007_gene1366	gamma proteobacterium	751994	aliases:AGIG01000007_GENE1366
566466.NOR53_1464	NOR53_1464	gamma proteobacterium	566466	aliases:B8KJ56,GI:219677507,CONSERVED HYPOTHETICAL PROTEIN TIGR00486,NOR53_1464,EED33872,B8KJ56_9GAMM,EED33872.1,219677507
876044.IMCC3088_919	EGG28163.1	gamma proteobacterium	876044	aliases:328920683,WP_009577408.1,GI:328920683,IMCC3088_919,EGG28163.1,EGG28163,F3L694,PROTEIN OF UNKNOWN FUNCTION DUF34,F3L694_9GAMM
745014.OMB55_00016310	EHQ57890.1	gamma proteobacterium	745014	aliases:DINUCLEAR METAL CENTER PROTEIN, YBGI/SA1388 FAMILY,374303706,H3NY89_9GAMM,INTERPRO:IPR002678,EHQ57890.1,GI:374303706,OMB55_00016310,EHQ57890,H3NY89,WP_009471413.1,IPR002678
1492922.GY26_10770	GY26_10770	Gammaproteobacteria bacterium	1492922	aliases:GY26_10770,KFF49033.1,A0A086D3L9_9GAMM,METAL-BINDING PROTEIN,A0A086D3L9,671421201,KFF49033,WP_035473802.1,GI:671421201
69293.ENSGACP00000010115	69293.ENSGACP00000010115	Gasterosteus aculeatus	69293	aliases:ENSGACG00000007615,ENSGACT00000010154,ENSGACP00000010115,UPI0000E3EEB4,NIF3L1-202,ENSGACT00000010144,ENSGACP00000010132,G3NXP5_GASAC,ENSGACP00000010122,ZGC:110030,G3NXP5,UPI0000E3EEB3,NIF3L1,GAC.10397,NIF3L1-203,UPI0000E3EEB5,ENSGACT00000010137,NIF3L1-201,IM:6900987,NIF3 NGG1 INTERACTING FACTOR 3-LIKE 1 (S. CEREVISIAE)
1046714.AMRX01000006_gene3088	1046714.AMRX01000006_gene3088	Gayadomonas joobiniege	1046714	aliases:AMRX01000006_GENE3088
1173025.GEI7407_0721	AFY65219.1	Geitlerinema sp.	1173025	aliases:427984075,GI:427984075,INTERPRO:IPR002678,AFY65219.1,AFY65219,WP_015170787.1,GEI7407_0721,K9S630_9CYAN,PROTEIN OF UNKNOWN FUNCTION DUF34,K9S630,IPR002678,GEI:GEI7407_0721
1121912.AUHD01000001_gene2359	1121912.AUHD01000001_gene2359	Gelidibacter mesophilus	1121912	aliases:AUHD01000001_GENE2359
1321820.HMPREF1983_00280	ERK60179.1	Gemella bergeriae	1321820	aliases:WP_021752604.1,INTERPRO:IPR002678,GI:544248143,DINUCLEAR METAL CENTER PROTEIN, YBGI FAMILY,HMPREF1983_00280,U2QVD3_9BACL,ERK60179,544248143,U2QVD3,ERK60179.1,IPR002678
1121914.AUDW01000002_gene655	1121914.AUDW01000002_gene655	Gemella cuniculi	1121914	aliases:AUDW01000002_GENE655
546270.GEMHA0001_0620	EER67592.1	Gemella haemolysans	546270	aliases:C5NYT0_9BACL,C5NYT0,GI:241863208,EER67592,EER67592.1,DINUCLEAR METAL CENTER PROTEIN, YBGI FAMILY,241863208,GEMHA0001_0620,WP_003144901.1
562981.HMPREF0428_00190	EGF87315.1	Gemella haemolysans	562981	aliases:WP_003146009.1,328837690,F3A0D2,F3A0D2_9BACL,GI:328837690,EGF87315,EGF87315.1,HMPREF0428_00190
562982.HMPREF0432_00236	EFV36162.1	Gemella morbillorum	562982	aliases:NIF3 PROTEIN,EFV36162,EFV36162.1,WP_004632051.1,E5V1J0_9BACL,GI:316914686,316914686,HMPREF0432_00236,E5V1J0
562983.HMPREF0433_01679	EGF85955.1	Gemella sanguinis	562983	aliases:EGF85955,F3AA54,EGF85955.1,328836286,GI:328836286,F3AA54_9BACL,YBGI/FAMILY DINUCLEAR METAL CENTER PROTEIN,HMPREF0433_01679,WP_006365074.1
1210884.HG799465_gene11536	1210884.HG799465_gene11536	Gemmata sp.	1210884	aliases:HG799465_GENE11536
861299.J421_1169	J421_1169	Gemmatimonadetes bacterium	861299	aliases:J421_1169,GI:575457589,575457589,GBA:J421_1169,AHG88706,NGG1P INTERACTING FACTOR 3 PROTEIN, NIF3,AHG88706.1,W0RD56,W0RD56_9BACT
379066.GAU_0025	GAU_0025	Gemmatimonas aurantiaca	379066	aliases:BAH37067,C1A3J0,GAU_0025,C1A3J0_GEMAT,WP_012681515.1,GI:226088622,BAH37067.1,226088622,GAU:GAU_0025
1379270.AUXF01000002_gene1218	1379270.AUXF01000002_gene1218	Gemmatimonas sp.	1379270	aliases:GEMMAAP_00145,AUXF01000002_GENE1218,A0A143BMX7,AMW06426,A0A143BMX7_9BACT,GPH:GEMMAAP_00145
1234664.AMRO01000027_gene1441	B4119_2861	Geobacillus caldoxylosilyticus	1234664	aliases:GTP CYCLOHYDROLASE 1 TYPE 2 HOMOLOG,WP_061579653.1,B4119_2861,AMRO01000027_GENE1441,A0A150LJC5,A0A150LJC5_9BACI
235909.GK2478	GK2478	Geobacillus kaustophilus	235909	aliases:GTP CYCLOHYDROLASE 1 TYPE 2 HOMOLOG,GK2478,32064360,GKA:GK2478,BAD76763,HYPOTHETICAL CONSERVED PROTEIN,Q5KX23_GEOKA,WP_011231958.1,Q5KX23,56380855,GI:56380855,BAD76763.1
1345697.M493_12855	AGT32817.1	Geobacillus sp.	1345697	aliases:GI:530458241,AGT32817,530458241,AGT32817.1,M493_12855
1345697.M493_09737	AHA58143.1	Geobacillus sp.	1345697	aliases:GI:558500361,M493_09737,AHA58143,558500361,AHA58143.1
471223.GWCH70_2410	ACS25106.1	Geobacillus sp.	471223	aliases:GTP CYCLOHYDROLASE 1 TYPE 2 HOMOLOG,GWCH70_2410,C5D4R4,INTERPRO:IPR002678,WP_015864520.1,PROTEIN OF UNKNOWN FUNCTION DUF34,GWC:GWCH70_2410,GI:239808041,239808041,ACS25106,C5D4R4_GEOSW,ACS25106.1,IPR002678
1430331.EP10_05495	EP10_05495	Geobacillus sp.	1430331	aliases:KFX34891,KFX34891.1,GI:679863591,EP10_05495,679863591
1295642.H839_12919	H839_12919	Geobacillus stearothermophilus	1295642	aliases:EZP76179.1,GTP CYCLOHYDROLASE 1 TYPE 2 HOMOLOG,A0A023CLM5_9BACI,A0A023CLM5,GI:612118161,H839_12919,WP_043905502.1,612118161,EZP76179
420246.GTNG_2415	GTNG_2415	Geobacillus thermodenitrificans	420246	aliases:GTP CYCLOHYDROLASE 1 TYPE 2 HOMOLOG,A4IR06,ABO67760,GTN:GTNG_2415,GTNG_2415,31761659,ABO67760.1,A4IR06_GEOTN,WP_011887826.1,134267565,GI:134267565
420246.GTNG_1760	GTNG_1760	Geobacillus thermodenitrificans	420246	aliases:GTN:GTNG_1760,ABO67124.1,NGG1-INTERACTING FACTOR 3,134266929,ABO67124,GTNG_1760,GI:134266929,A4IP70,WP_008880079.1,31761017,A4IP70_GEOTN
634956.Geoth_1199	GT23_1625	Geobacillus thermoglucosidasius	634956	aliases:GEOTH_1199,BAA00_06755,GI:335361514,A0A178TZM6_GEOTM,A0A178TZM6,INTERPRO:IPR002678,AEH47194.1,NGG1P INTERACTING FACTOR 3 PROTEIN, NIF3,GT23_1625,WP_003249107.1,GTP CYCLOHYDROLASE 1 TYPE 2 HOMOLOG,335361514,29240141,GTH:GEOTH_1199,AEH47194,IPR002678
634956.Geoth_2247	AEH48178.1	Geobacillus thermoglucosidasius	634956	aliases:GTH:GEOTH_2247,IPR002678,INTERPRO:IPR002678,335362498,NGG1P INTERACTING FACTOR 3 PROTEIN, NIF3,AEH48178.1,AEH48178,GEOTH_2247,GI:335362498
1382315.JPOI01000001_gene2355	1382315.JPOI01000001_gene2355	Geobacillus vulcani	1382315	aliases:JPOI01000001_GENE2355
1382315.JPOI01000001_gene1809	1382315.JPOI01000001_gene1809	Geobacillus vulcani	1382315	aliases:JPOI01000001_GENE1809
404380.Gbem_0478	yqfO	Geobacter bemidjiensis	404380	aliases:ACH37507,GTP CYCLOHYDROLASE 1 TYPE 2 HOMOLOG,GBM:GBEM_0478,197086236,DIMETAL-BINDING PROTEIN YQFO,YQFO,GI:197086236,WP_012528914.1,GBEM_0478,ACH37507.1,B5EBN8,B5EBN8_GEOBB
316067.Geob_0767	yqfO	Geobacter daltonii	316067	aliases:GTP CYCLOHYDROLASE 1 TYPE 2 HOMOLOG,GEOB_0767,ACM19129,GEO:GEOB_0767,221563157,GI:221563157,DIMETAL-BINDING PROTEIN YQFO,ACM19129.1,YQFO,B9M159_GEODF,B9M159,WP_012645858.1
398767.Glov_0683	Glov_0683	Geobacter lovleyi	398767	aliases:189420011,GLO:GLOV_0683,INTERPRO:IPR002678,GI:189420011,PROTEIN OF UNKNOWN FUNCTION DUF34,ACD94409.1,GTP CYCLOHYDROLASE 1 TYPE 2 HOMOLOG,B3E3Z5,GLOV_0683,B3E3Z5_GEOLS,ACD94409,IPR002678
269799.Gmet_0399	yqfO	Geobacter metallireducens	269799	aliases:78192875,GMET_0399,GTP CYCLOHYDROLASE 1 TYPE 2 HOMOLOG,ABB30642.1,Q39YN2_GEOMG,GME:GMET_0399,DIMETAL-BINDING PROTEIN YQFO,GI:78192875,YQFO,WP_004512371.1,ABB30642,Q39YN2
443143.GM18_3900	GM18_3900	Geobacter sp.	443143	aliases:GI:320127762,WP_015722143.1,GEB:GM18_3900,INTERPRO:IPR017221,E8WSH5,320127762,INTERPRO:IPR002678,ADW15322,ADW15322.1,GM18_3900,GTP CYCLOHYDROLASE 1 TYPE 2 HOMOLOG,PROTEIN OF UNKNOWN FUNCTION DUF34,IPR002678,IPR017221,E8WSH5_GEOS8
443144.GM21_0495	GM21_0495	Geobacter sp.	443144	aliases:C6DZJ3_GEOSM,GI:251773994,WP_012774198.1,INTERPRO:IPR002678,GM21_0495,GEM:GM21_0495,ACT16575,GTP CYCLOHYDROLASE 1 TYPE 2 HOMOLOG,251773994,PROTEIN OF UNKNOWN FUNCTION DUF34,ACT16575.1,C6DZJ3,IPR002678
243231.GSU3085	yqfO	Geobacter sulfurreducens	243231	aliases:Q748C2_GEOSL,GTP CYCLOHYDROLASE 1 TYPE 2 HOMOLOG,AAR36476.2,NP_954126.2,WP_010943706.1,GSU3085,2688481,Q748C2,DIMETAL-BINDING PROTEIN YQFO,GI:399108087,399108087,GSU:GSU3085,YQFO,AAR36476,NP_954126
1380347.JNII01000008_gene4419	1380347.JNII01000008_gene4419	Geodermatophilaceae bacterium	1380347	aliases:JNII01000008_GENE4419
1380393.JHVP01000003_gene1171	1380393.JHVP01000003_gene1171	Geodermatophilaceae bacterium	1380393	aliases:JHVP01000003_GENE1171
526225.Gobs_3463	Gobs_3463	Geodermatophilus obscurus	526225	aliases:GI:284065123,WP_012949490.1,D2SB26_GEOOG,GOBS_3463,INTERPRO:IPR002678,284065123,ADB76061,ADB76061.1,GOB:GOBS_3463,PROTEIN OF UNKNOWN FUNCTION DUF34,D2SB26,IPR002678
565033.GACE_0016	GACE_0016	Geoglobus acetivorans	565033	aliases:A0A0A7GAN1_9EURY,AIY89079.1,WP_048090147.1,728874768,AIY89079,GACE_0016,GI:728874768,24796622,GAC:GACE_0016,A0A0A7GAN1
1460634.JCM19037_2575	GAK04190.1	Geomicrobium sp.	1460634	aliases:GAK04190,WP_042401110.1,A0A061NNS3_9BACL,GI:636730837,GTP CYCLOHYDROLASE 1 TYPE 2 HOMOLOG,GAK04190.1,A0A061NNS3,636730837,JCM19037_2575
1460635.JCM19038_149	GAK06453.1	Geomicrobium sp.	1460635	aliases:636723782,GTP CYCLOHYDROLASE 1 TYPE 2 HOMOLOG,GAK06453.1,JCM19038_149,A0A061NP79_9BACL,GI:636723782,GAK06453,A0A061NP79,WP_042413489.1
1121918.ARWE01000001_gene2363	1121918.ARWE01000001_gene2363	Geopsychrobacter electrodiphilus	1121918	aliases:ARWE01000001_GENE2363
1304888.ATWF01000001_gene634	1304888.ATWF01000001_gene634	Geovibrio sp.	1304888	aliases:ATWF01000001_GENE634
1196095.GAPWK_1686	GAPWK_1686	Gilliamella apicola	1196095	aliases:AHN26259.1,WP_025315800.1,X2GYR6_9GAMM,X2GYR6,597811428,AHN26259,HYPOTHETICAL PROTEIN YBGI,GAP:GAPWK_1686,GAPWK_1686,29850986,GI:597811428
865937.Gilli_2801	Gilli_2801	Gillisia limnaea	865937	aliases:EHQ03414.1,373871416,GI:373871416,H2BZK5_9FLAO,INTERPRO:IPR002678,EHQ03414,NGG1P INTERACTING FACTOR 3 PROTEIN, NIF3,INTERPRO:IPR017221,H2BZK5,GTP CYCLOHYDROLASE 1 TYPE 2 HOMOLOG,WP_006989720.1,IPR002678,IPR017221,GILLI_2801
1249975.JQLP01000005_gene844	1249975.JQLP01000005_gene844	Gillisia sp.	1249975	aliases:JQLP01000005_GENE844
985255.APHJ01000027_gene870	985255.APHJ01000027_gene870	Gillisia sp.	985255	aliases:APHJ01000027_GENE870
493475.GARC_2497	GARC_2497	Glaciecola arctica	493475	aliases:410148461,GAC19463,GARC_2497,WP_007620315.1,GAC19463.1,GI:410148461,K6YS06_9ALTE,K6YS06
1127673.GLIP_1681	GLIP_1681	Glaciecola lipolytica	1127673	aliases:GLIP_1681,GAC14314,K6X105,K6X105_9ALTE,410144127,GI:410144127,GAC14314.1
1128912.GMES_2905	GMES_2905	Glaciecola mesophila	1128912	aliases:GI:410152763,GMES_2905,WP_006993346.1,GAC25195,410152763,GAC25195.1,K6ZPC2_9ALTE,K6ZPC2
1085623.GNIT_2003	GNIT_2003	Glaciecola nitratireducens	1085623	aliases:GNI:GNIT_2003,METAL-BINDING PROTEIN,G4QLK6_GLANF,AEP30112.1,WP_014108986.1,GI:347946762,AEP30112,347946762,GNIT_2003,G4QLK6
1129794.C427_2823	C427_2823	Glaciecola psychrophila	1129794	aliases:AGH44932,GI:469485079,GPS:C427_2823,C427_2823,AGH44932.1,469485079,K7ALK0,K7ALK0_9ALTE,WP_007635507.1
1121923.GPUN_1059	GPUN_1059	Glaciecola punicea	1121923	aliases:379329942,GI:379329942,H5TA63_9ALTE,GPUN_1059,GAB55190,H5TA63,GAB55190.1,WP_006004079.1
983545.Glaag_2087	Glaag_2087	Glaciecola sp.	983545	aliases:GI:332173778,GAG:GLAAG_2087,INTERPRO:IPR002678,WP_013753733.1,332173778,AEE23032.1,AEE23032,PROTEIN OF UNKNOWN FUNCTION DUF34,F4AQA1_GLAS4,F4AQA1,GLAAG_2087,IPR002678
455436.DS989810_gene152	455436.DS989810_gene152	Glaciecola sp.	455436	aliases:DS989810_GENE152
1121924.ATWH01000002_gene4040	1121924.ATWH01000002_gene4040	Glaciibacter superstes	1121924	aliases:ATWH01000002_GENE4040
101852.XP_008078361.1	101852.XP_008078361.1	Glarea lozoyensis	101852	aliases:XM_008080170.1,XP_008078361.1,GLAREA_10120,NIF3 (NGG1P INTERACTING FACTOR 3)-LIKE PROTEIN,GENEID:19469167,GLZ:GLAREA_10120,S3DQX7_GLAL2,GI:636752375,XP_008078361,636752375,S3DQX7,19469167
1173026.Glo7428_2355	AFZ30866.1	Gloeocapsa sp.	1173026	aliases:GLO7428_2355,WP_015188738.1,K9XFM6_9CHRO,AFZ30866.1,GLP:GLO7428_2355,GI:428264920,NGG1P INTERACTING FACTOR 3 PROTEIN, NIF3,AFZ30866,INTERPRO:IPR002678,428264920,K9XFM6,IPR002678
104355.XP_007860725.1	104355.XP_007860725.1	Gloeophyllum trabeum	104355	aliases:630342849,JGIDB:GLOTR1_1_124031,19301040,INTERPRO:IPR002678,S7RZ54_GLOTA,XM_007862534.1,GI:630342849,GENEID:19301040,NGG1P INTERACTING FACTOR 3,GTR:GLOTRDRAFT_124031,XP_007860725,GLOTR1_1_124031,S7RZ54,XP_007860725.1,GLOTRDRAFT_124031,IPR002678
1121926.AXWO01000003_gene723	1121926.AXWO01000003_gene723	Glycomyces arizonensis	1121926	aliases:AXWO01000003_GENE723
1463821.JOGR01000013_gene3222	1463821.JOGR01000013_gene3222	Glycomyces sp.	1463821	aliases:JOGR01000013_GENE3222
1463821.JOGR01000010_gene3846	1463821.JOGR01000010_gene3846	Glycomyces sp.	1463821	aliases:JOGR01000010_GENE3846
1220583.GOACH_58_01180	GAC51263.1	Gordonia aichiensis	1220583	aliases:WP_005180680.1,L7KU69,GTP CYCLOHYDROLASE 1 TYPE 2 HOMOLOG,GAC51263.1,GI:441444573,441444573,GAC51263,L7KU69_9ACTN,GOACH_58_01180
1027371.GOALK_002_00850	GAA10620.1	Gordonia alkanivorans	1027371	aliases:GTP CYCLOHYDROLASE 1 TYPE 2 HOMOLOG,343765936,WP_006356800.1,GOALK_002_00850,F9VPT1,F9VPT1_9ACTN,GI:343765936,GAA10620,GAA10620.1
1075090.GOAMR_40_01330	GAB05643.1	Gordonia amarae	1075090	aliases:G7GPW8_9ACTN,GTP CYCLOHYDROLASE 1 TYPE 2 HOMOLOG,GAB05643,GI:358239857,GAB05643.1,G7GPW8,WP_005187115.1,358239857,GOAMR_40_01330
1386969.AWTB01000117_gene198	1386969.AWTB01000117_gene198	Gordonia amicalis	1386969	aliases:AWTB01000117_GENE198
526226.Gbro_3096	Gbro_3096	Gordonia bronchialis	526226	aliases:GTP CYCLOHYDROLASE 1 TYPE 2 HOMOLOG,IPR002678,INTERPRO:IPR002678,262086334,WP_012834818.1,ACY22302,D0LB09_GORB4,D0LB09,PROTEIN OF UNKNOWN FUNCTION DUF34,GI:262086334,GBRO_3096,ACY22302.1,GBR:GBRO_3096
1077974.GOEFS_077_00090	GAB19217.1	Gordonia effusa	1077974	aliases:GOEFS_077_00090,GAB19217,359309791,GAB19217.1,H0R2B6,GTP CYCLOHYDROLASE 1 TYPE 2 HOMOLOG,GI:359309791,WP_007318552.1,H0R2B6_9ACTN
1121927.GOHSU_16_00330	GAC57076.1	Gordonia hirsuta	1121927	aliases:WP_005938531.1,GTP CYCLOHYDROLASE 1 TYPE 2 HOMOLOG,441455660,L7L8L1_9ACTN,GOHSU_16_00330,GI:441455660,L7L8L1,GAC57076,GAC57076.1
468556.AQYG01000049_gene1129	468556.AQYG01000049_gene1129	Gordonia kroppenstedtii	468556	aliases:AQYG01000049_GENE1129
1223542.GM1_004_01690	GAC78724.1	Gordonia malaquae	1223542	aliases:GTP CYCLOHYDROLASE 1 TYPE 2 HOMOLOG,453365804,GM1_004_01690,GAC78724,GAC78724.1,M3VDU4,WP_008376855.1,GI:453365804,M3VDU4_9ACTN
644548.SCNU_06020	SCNU_06020	Gordonia neofelifaecis	644548	aliases:F1YHD6_9ACTN,326198591,EGD55774,EGD55774.1,SCNU_06020,GTP CYCLOHYDROLASE 1 TYPE 2 HOMOLOG,F1YHD6,GI:326198591
1223543.GP2_022_00810	GAC84465.1	Gordonia paraffinivorans	1223543	aliases:M3UU17,GTP CYCLOHYDROLASE 1 TYPE 2 HOMOLOG,M3UU17_9ACTN,GAC84465.1,WP_006900699.1,GP2_022_00810,GAC84465,GI:453380941,453380941
1112204.GPOL_c28560	AFA73876.1	Gordonia polyisoprenivorans	1112204	aliases:GTP CYCLOHYDROLASE 1 TYPE 2 HOMOLOG,375753056,H6MTK1_GORPV,H6MTK1,NIF3 (NGG1P INTERACTING FACTOR 3),GPO:GPOL_C28560,AFA73876.1,GPOL_C28560,GI:375753056,AFA73876
1108045.GORHZ_004_00050	GAB88123.1	Gordonia rhizosphera	1108045	aliases:WP_006329147.1,GAB88123,GTP CYCLOHYDROLASE 1 TYPE 2 HOMOLOG,GORHZ_004_00050,403207931,GAB88123.1,K6UXK3,K6UXK3_9ACTN,GI:403207931
1121928.AUHE01000008_gene2983	1121928.AUHE01000008_gene2983	Gordonia shandongensis	1121928	aliases:AUHE01000008_GENE2983
1223544.GSI01S_06_00760	GAC59922.1	Gordonia sihwensis	1223544	aliases:GTP CYCLOHYDROLASE 1 TYPE 2 HOMOLOG,GSI01S_06_00760,WP_006895234.1,GAC59922,GAC59922.1,L7LIJ0_9ACTN,L7LIJ0,GI:441460041,441460041
1223545.GS4_25_00330	GAC69462.1	Gordonia soli	1223545	aliases:M0QPU5,GTP CYCLOHYDROLASE 1 TYPE 2 HOMOLOG,M0QPU5_9ACTN,WP_007622556.1,GAC69462.1,GI:443886510,443886510,GAC69462,GS4_25_00330
337191.KTR9_3083	KTR9_3083	Gordonia sp.	337191	aliases:GOR:KTR9_3083,GTP CYCLOHYDROLASE 1 TYPE 2 HOMOLOG,KTR9_3083,J9SM74,AFR49718.1,GI:403646478,403646478,J9SM74_9ACTN,AFR49718
1089453.GOSPT_072_00280	GAB39575.1	Gordonia sputi	1089453	aliases:GAB39575.1,GTP CYCLOHYDROLASE 1 TYPE 2 HOMOLOG,H5U1G7,GI:377527693,GAB39575,377527693,WP_005206446.1,GOSPT_072_00280,H5U1G7_9ACTN
2055.JNXA01000003_gene4420	2055.JNXA01000003_gene4420	Gordonia terrae	2055	aliases:GOTRE_145_00780,JNXA01000003_GENE4420,GTP CYCLOHYDROLASE 1 TYPE 2 HOMOLOG,H5UK90_9ACTN,WP_004022949.1,32689290,ANY24068,GTA:BCM27_15835,H5UK90
9593.ENSGGOP00000013714	NIF3L1	Gorilla gorilla	9593	aliases:XP_004033066,101127325,XM_004033017.1,G3RDV2,GGO:101127325,XP_018877350.1,XP_018877351.1,XP_004033067.1,XM_004033019,XM_004033018,MDS015,ENSGGOP00000013714,XM_004033017,NIF3 NGG1 INTERACTING FACTOR 3-LIKE 1 (S. CEREVISIAE),XP_018877349.1,ALS2CR1,NIF3-LIKE PROTEIN 1,ENSGGOT00000014108,CALS-7,ENSGGOT00000025074,NIF3L1,XP_004033065.1,UPI0001FA14F8,UPI0001FA14F9,G3RUV8,XP_004033065,NGG1 INTER…
1298598.JCM21714_964	GAE91990.1	Gracilibacillus boraciitolerans	1298598	aliases:W4VF29,GI:575085397,GAE91990.1,575085397,GAE91990,W4VF29_9BACI,JCM21714_964
1298598.JCM21714_963	GAE91989.1	Gracilibacillus boraciitolerans	1298598	aliases:GAE91989.1,W4VGW2_9BACI,GAE91989,GI:575085396,575085396,W4VGW2,JCM21714_963
1298598.JCM21714_116	GAE91175.1	Gracilibacillus boraciitolerans	1298598	aliases:GTP CYCLOHYDROLASE 1 TYPE 2 HOMOLOG,JCM21714_116,W4VCM4,GAE91175,GAE91175.1,W4VCM4_9BACI,GI:575085569,575085569,WP_035720845.1
1308866.J416_05758	J416_05758	Gracilibacillus halophilus	1308866	aliases:GI:477570067,GTP CYCLOHYDROLASE 1 TYPE 2 HOMOLOG,N4WMX1_9BACI,N4WMX1,J416_05758,ENH97492.1,477570067,WP_003466520.1,ENH97492
1121929.KB898664_gene1539	1121929.KB898664_gene1539	Gracilibacillus lacisalsi	1121929	aliases:KB898664_GENE1539
1121929.KB898663_gene1059	1121929.KB898663_gene1059	Gracilibacillus lacisalsi	1121929	aliases:KB898663_GENE1059
1121930.AQXG01000005_gene671	1121930.AQXG01000005_gene671	Gracilimonas tropica	1121930	aliases:AQXG01000005_GENE671
1121931.AUHG01000011_gene1809	1121931.AUHG01000011_gene1809	Gramella echinicola	1121931	aliases:AUHG01000011_GENE1809
411154.GFO_2707	GFO_2707	Gramella forsetii	411154	aliases:GTP CYCLOHYDROLASE 1 TYPE 2 HOMOLOG,INTERPRO:IPR017221,WP_011710566.1,CAL67663,A0M4W8_GRAFK,GI:117579194,INTERPRO:IPR002678,UNIPROTKB/TREMBL:A0M4W8,CAL67663.1,PROTEIN CONTAINING DUF34,A0M4W8,GFO_2707,GFO:GFO_2707,117579194,IPR017221,IPR002678
638301.HMPREF0444_0363	EEW37850.1	Granulicatella adiacens	638301	aliases:GTP CYCLOHYDROLASE 1 TYPE 2 HOMOLOG,EEW37850,GI:259036595,259036595,C8NEL8,DINUCLEAR METAL CENTER PROTEIN, YBGI FAMILY,HMPREF0444_0363,C8NEL8_9LACT,EEW37850.1,WP_005605411.1
626369.HMPREF0446_00427	EEW93545.1	Granulicatella elegans	626369	aliases:D0BKE2_9LACT,WP_006702701.1,EEW93545,GI:260158477,HMPREF0446_00427,D0BKE2,GTP CYCLOHYDROLASE 1 TYPE 2 HOMOLOG,260158477,EEW93545.1,YBGI/FAMILY DINUCLEAR METAL CENTER PROTEIN
1198114.AciX9_1815	AciX9_1815	Granulicella tundricola	1198114	aliases:ACIX9_1815,INTERPRO:IPR002678,PROTEIN OF UNKNOWN FUNCTION DUF34,ADW68863.1,E8WZH5_GRATM,321163158,WP_013580182.1,GI:321163158,ACM:ACIX9_1815,E8WZH5,ADW68863,IPR002678
1121933.AUHH01000008_gene1144	1121933.AUHH01000008_gene1144	Granulicoccus phenolivorans	1121933	aliases:AUHH01000008_GENE1144
675812.VHA_003203	VHA_003203	Grimontia hollisae	675812	aliases:D0IBS6_GRIHO,VHA_003203,AMG29723,D0IBS6,WP_005506332.1,GI:262220028,262220028,GHO:AL542_04485,EEY71344,EEY71344.1
1056512.D515_02127	D515_02127	Grimontia indica	1056512	aliases:GI:486372126,R1IUR6,486372126,EOD79055.1,R1IUR6_9GAMM,WP_002539571.1,EOD79055,D515_02127
226899.F0XND6	CMQ_1992	Grosmannia clavigera	226899	aliases:CMQ_1992,XP_014170393.1,25974931,F0XND6_GROCL,NGG1 INTERACTING FACTOR,F0XND6
1121372.AULK01000001_gene2154	1121372.AULK01000001_gene2154	Gryllotalpicola ginsengisoli	1121372	aliases:AULK01000001_GENE2154
55529.EKX42302	55529.EKX42302	Guillardia theta	55529	aliases:L1J1Z6,XP_005829282,XP_005829282.1,L1J1Z6_GUITH,GUITHDRAFT_111577,GTT:GUITHDRAFT_111577,UPI0002A0A4CD,EKX42302.1,17298985,EKX42302
1121934.AUDX01000002_gene2771	1121934.AUDX01000002_gene2771	Gulosibacter molinativorax	1121934	aliases:AUDX01000002_GENE2771
233412.HD_1471	HD_1471	Haemophilus ducreyi	233412	aliases:33148755,HDU:HD_1471,HD_1471,AAP96273.1,24943665,WP_010945318.1,Q7VLH4_HAEDU,GI:33148755,Q7VLH4,AAP96273
1028803.GG9_0426	GG9_0426	Haemophilus haemolyticus	1028803	aliases:EGT76560,GENEID:12644452,PFAM:PF01784,12644452,TIGRFAM:TIGR00486,INTERPRO:IPR002678,EGT76560.1,TIGR00486,341949963,F9GMY1_HAEHA,UPF0135 PROTEIN,WP_005630686.1,PF01784,GI:341949963,F9GMY1,GG9_0426,IPR002678
1028805.GGC_1608	GGC_1608	Haemophilus haemolyticus	1028805	aliases:12644452,PFAM:PF01784,EGT78896,F9H1J0_HAEHA,TIGRFAM:TIGR00486,INTERPRO:IPR002678,F9H1J0,GI:341952366,GGC_1608,TIGR00486,UPF0135 PROTEIN,PF01784,EGT78896.1,341952366,GENEID:12644452,IPR002678
1028806.GGE_0089	GGE_0089	Haemophilus haemolyticus	1028806	aliases:WP_005639529.1,PFAM:PF01784,12644452,F9H2H9,EGT83212.1,341956796,PF01784,TIGR00486,TIGRFAM:TIGR00486,F9H2H9_HAEHA,UPF0135 PROTEIN,IPR002678,EGT83212,INTERPRO:IPR002678,GENEID:12644452,GI:341956796,GGE_0089
71421.HI_0105	HI_0105	Haemophilus influenzae	71421	aliases:GTP CYCLOHYDROLASE 1 TYPE 2 HOMOLOG,WP_005649665.1,O05008,HI_0105,GCH1L_HAEIN,Q57354,HIX:NTHI723_01608,1573058,AJO92002,GI:1573058,951007,NP_438279.2,AAC21783,AAC21783.1
862965.PARA_18880	PARA_18880	Haemophilus parainfluenzae	862965	aliases:UNIPROTKB/TREMBL:E1W6J4,CBW15988.1,INTERPRO:IPR002678,301156517,E1W6J4_HAEP3,CONSERVED METAL-BINDING PROTEIN,HPR:PARA_18880,WP_014065602.1,GI:301156517,PARA_18880,E1W6J4,CBW15988,IPR002678
1095743.HMPREF1054_0126	EIG25866.1	Haemophilus paraphrohaemolyticus	1095743	aliases:EIG25866.1,385695304,EIG25866,I2NJ55,DINUCLEAR METAL CENTER PROTEIN, YBGI FAMILY,HMPREF1054_0126,GI:385695304,WP_005708758.1,I2NJ55_9PAST
205914.HS_0663	HS_0663	Haemophilus somnus	205914	aliases:HSO:HS_0663,112822851,WP_011608819.1,ABI24940.1,ABI24940,GI:112822851,Q0I2X0_HAES1,Q0I2X0,HS_0663
1461579.CCNK01000042_gene2001	1461579.CCNK01000042_gene2001	Haemophilus sp.	1461579	aliases:CCNK01000042_GENE2001
1035839.AFNK01000055_gene726	1035839.AFNK01000055_gene726	Haemophilus sputorum	1035839	aliases:AFNK01000055_GENE726
1453496.AT03_06800	AT03_06800	Hafnia alvei	1453496	aliases:WP_025800695.1,A0A097R098,AIU72130,GI:700335636,700335636,METAL-BINDING PROTEIN,AIU72130.1,HAV:AT03_06800,AT03_06800,A0A097R098_HAFAL
349521.HCH_05302	HCH_05302	Hahella chejuensis	349521	aliases:WP_011399039.1,ABC31975,Q2SBJ9_HAHCH,Q2SBJ9,ABC31975.1,HCH_05302,HCH:HCH_05302,GI:83636008,UNCHARACTERIZED CONSERVED PROTEIN,83636008
1121935.AQXX01000136_gene4048	1121935.AQXX01000136_gene4048	Hahella ganghwensis	1121935	aliases:AQXX01000136_GENE4048
1455608.JDTH01000001_gene3755	1455608.JDTH01000001_gene3755	Haladaptatus cibarius	1455608	aliases:JDTH01000001_GENE3755
797209.ZOD2009_05947	EFW93383.1	Haladaptatus paucihalophilus	797209	aliases:E7QQW9_9EURY,PUTATIVE HYDROLASE-OXIDASE,ZOD2009_05947,GI:320551736,EFW93383,EFW93383.1,E7QQW9,320551736,WP_007977929.1
1121936.AUHI01000005_gene2197	1121936.AUHI01000005_gene2197	Halalkalibacillus halophilus	1121936	aliases:AUHI01000005_GENE2197
795797.C497_04427	C497_04427	Halalkalicoccus jeotgali	795797	aliases:C497_04427,PUTATIVE HYDROLASE-OXIDASE,D8JA77,GI:445585679,445585679,ADJ14599,HJE:HACJB3_06040,D8JA77_HALJB,HACJB3_06040,ELY39972,ELY39972.1
795797.C497_13116	C497_13116	Halalkalicoccus jeotgali	795797	aliases:C497_13116,9419722,445581129,D8J3I8_HALJB,GI:445581129,HACJB3_09560,WP_008417230.1,D8J3I8,ELY35492,ADJ15295,ELY35492.1,HJE:HACJB3_09560
656519.Halsa_1658	Halsa_1658	Halanaerobium hydrogeniformans	656519	aliases:311904640,ADQ15081.1,GTP CYCLOHYDROLASE 1 TYPE 2 HOMOLOG,INTERPRO:IPR017221,INTERPRO:IPR002678,HALSA_1658,PROTEIN OF UNKNOWN FUNCTION DUF34,HAS:HALSA_1658,E4RIL1,IPR017221,ADQ15081,E4RIL1_HALHG,WP_013406158.1,GI:311904640,IPR002678
572479.Hprae_0672	Hprae_0672	Halanaerobium praevalens	572479	aliases:ADO76826,GI:309388946,WP_014552859.1,HPRAE_0672,E3DQD0,E3DQD0_HALPG,309388946,ADO76826.1,PROTEIN OF UNKNOWN FUNCTION DUF34,HPK:HPRAE_0672,GTP CYCLOHYDROLASE 1 TYPE 2 HOMOLOG
1293054.HSACCH_02032	CCU80440.1	Halanaerobium saccharolyticum	1293054	aliases:460787229,GTP CYCLOHYDROLASE 1 TYPE 2 HOMOLOG,CCU80440,HSACCH_02032,M5E3M1,WP_005489696.1,GI:460787229,PROTEIN OF UNKNOWN FUNCTION DUF34,M5E3M1_9FIRM,CCU80440.1
1457250.BBMO01000002_gene2155	1457250.BBMO01000002_gene2155	Halapricum salinum	1457250	aliases:BBMO01000002_GENE2155
1261545.MBE-HAL_2318	1261545.MBE-HAL_2318	Halarchaeum acidiphilum	1261545	aliases:U3AFJ6_9EURY,MBEHAL_2318,U3AFJ6,WP_020221962.1,MBE-HAL_2318
52644.XP_010562944.1	NIF3L1	Haliaeetus leucocephalus	52644	aliases:GI:729721019,XM_010564642.1,XP_010562944,104830005,729721019,NIF3L1,PUTATIVE GTP CYCLOHYDROLASE 1 TYPE 2 NIF3L1,XP_010562944.1,GENEID:104830005
502025.Hoch_5270	Hoch_5270	Haliangium ochraceum	502025	aliases:GTP CYCLOHYDROLASE 1 TYPE 2 HOMOLOG,IPR002678,GI:262081786,D0LXK0,INTERPRO:IPR002678,HOH:HOCH_5270,PROTEIN OF UNKNOWN FUNCTION DUF34,ACY17755.1,HOCH_5270,262081786,ACY17755,D0LXK0_HALO1
1265313.HRUBRA_02183	KGE03235.1	Haliea rubra	1265313	aliases:A0A095VPD2,687958176,GI:687958176,A0A095VPD2_9GAMM,KGE03235,KGE03235.1,WP_035515859.1,HRUBRA_02183
1121937.AUHJ01000014_gene2622	1121937.AUHJ01000014_gene2622	Haliea salexigens	1121937	aliases:AUHJ01000014_GENE2622
760192.Halhy_4009	Halhy_4009	Haliscomenobacter hydrossis	760192	aliases:332334756,GI:332334756,HHY:HALHY_4009,AEE51857.1,WP_013766395.1,INTERPRO:IPR002678,NGG1P INTERACTING FACTOR 3 PROTEIN, NIF3,F4L5M2_HALH1,AEE51857,F4L5M2,HALHY_4009,IPR002678
1071085.KK033114_gene971	1071085.KK033114_gene971	haloarchaeon 3A1_DGR	1071085	aliases:KK033114_GENE971
634497.HAH_2433	nif3	Haloarcula hispanica	634497	aliases:343784043,HAH_2433,G0HXU7,G0HXU7_HALHT,25155037,WP_014041124.1,GI:343784043,NGG1P INTERACTING FACTOR 3,NIF3,HHI:HAH_2433,AEM58020,AEM58020.1
1227453.C444_04542	C444_04542	Haloarcula japonica	1227453	aliases:EMA33675.1,EMA33675,GI:445782834,C444_04542,M0LNR5_HALJP,NGG1P INTERACTING FACTOR 3,M0LNR5,WP_004591198.1,445782834
272569.rrnAC1923	nif3	Haloarcula marismortui	272569	aliases:3128675,HMA:RRNAC1923,AAV46795,RRNAC1923,Q5V108_HALMA,AAV46795.1,55231376,GI:55231376,WP_011223927.1,NGG1P INTERACTING FACTOR 3,Q5V108,NIF3
240302.BN982_00268	CDQ18023.1	Halobacillus dabanensis	240302	aliases:METAL-BINDING PROTEIN,BN982_00268,CDQ18023.1,GI:635348251,635348251,CDQ18023
866895.HBHAL_3544	yqfO	Halobacillus halophilus	866895	aliases:WP_014643779.1,GTP CYCLOHYDROLASE 1 TYPE 2 HOMOLOG,INTERPRO:IPR017221,CCG45890.1,HHD:HBHAL_3544,GI:384074397,384074397,IPR017221,HBHAL_3544,CCG45890,I0JP20,GOA:I0JP20,INTERPRO:IPR002678,YQFO,UNIPROTKB/TREMBL:I0JP20,I0JP20_HALH3,IPR002678
1121938.AUDY01000010_gene2806	1121938.AUDY01000010_gene2806	Halobacillus kuroshimensis	1121938	aliases:AUDY01000010_GENE2806
1246484.D479_14487	D479_14487	Halobacillus sp.	1246484	aliases:GI:432188268,GTP CYCLOHYDROLASE 1 TYPE 2 HOMOLOG,D479_14487,432188268,L5N4E5_9BACI,ELK45472.1,L5N4E5,ELK45472,WP_008638235.1
751944.HALDL1_13805	AHG04540.1	Halobacterium sp.	751944	aliases:HALDL1_13805,W0K4V3_9EURY,AHG04540.1,573486134,AHG04540,WP_009487651.1,GI:573486134,25142430,HDL:HALDL1_13805,W0K4V3
748449.Halha_1867	Halha_1867	Halobacteroides halobius	748449	aliases:WP_015327495.1,GTP CYCLOHYDROLASE 1 TYPE 2 HOMOLOG,DINUCLEAR METAL CENTER PROTEIN, YBGI/SA1388 FAMILY,HALHA_1867,HHL:HALHA_1867,INTERPRO:IPR002678,433670964,GI:433670964,AGB41779.1,IPR017221,AGB41779,L0KBP7_HALHC,IPR002678,L0KBP7,INTERPRO:IPR017221
748449.Halha_2074	Halha_2074	Halobacteroides halobius	748449	aliases:HALHA_2074,L0KD12,AGB41968.1,INTERPRO:IPR002678,AGB41968,GI:433671153,433671153,HHL:HALHA_2074,WP_015327682.1,L0KD12_HALHC,IPR002678
1448860.BBJO01000003_gene2518	1448860.BBJO01000003_gene2518	Halobellus rufus	1448860	aliases:BBJO01000003_GENE2518
358396.C445_01261	C445_01261	Halobiforma lacisalsi	358396	aliases:C445_01261,M0LWE8_9EURY,30921120,EMA37473,HLC:CHINAEXTREME08310,NIF3-LIKE DINUCLEAR METAL CENTER HEXAMERIC PROTEIN,CHINAEXTREME_08310,WP_007140010.1,APW97780,GI:445786709,EMA37473.1,M0LWE8,445786709
1132509.C447_15301	C447_15301	Halococcus hamelinensis	1132509	aliases:445785850,C447_15301,PUTATIVE HYDROLASE-OXIDASE,M0LT81,EMA36636,GI:445785850,M0LT81_9EURY,WP_007695396.1,EMA36636.1
931277.C448_06458	C448_06458	Halococcus morrhuae	931277	aliases:EMA46401.1,M0ML60_HALMO,WP_004052916.1,M0ML60,EMA46401,GI:445795881,445795881,C448_06458
1197130.BAFM01000003_gene736	1197130.BAFM01000003_gene736	Halococcus sp.	1197130	aliases:BAFM01000003_GENE736
1227457.C451_13736	C451_13736	Halococcus thailandensis	1227457	aliases:EMA51819,EMA51819.1,GI:445801485,M0N3X3_9EURY,NGG1P INTERACTING FACTOR 3 PROTEIN, NIF3,C451_13736,445801485,WP_007741341.1,M0N3X3
523841.HFX_2308	HFX_2308	Haloferax mediterranei	523841	aliases:BM92_12320,AFK19995.1,13028465,WP_004059719.1,I3R6Y5,HME:HFX_2308,388245049,NGG1P INTERACTING FACTOR 3,C439_13349,I3R6Y5_HALMT,HFX_2308,GI:388245049,AFK19995
662479.C440_03983	C440_03983	Haloferax mucosum	662479	aliases:NGG1P INTERACTING FACTOR 3,445745437,ELZ96904.1,ELZ96904,C440_03983,GI:445745437
309800.C498_06785	HVO_2298	Haloferax volcanii	309800	aliases:445578927,HVO_2298,ADE02470,D4GWG2_HALVD,D4GWG2,8925368,ELY33326,ELY33326.1,C498_06785,WP_004042190.1,GI:445578927,HVO:HVO_2298,GTP CYCLOHYDROLASE 1 DOMAIN PROTEIN
1396141.BATP01000039_gene1303	1396141.BATP01000039_gene1303	Haloferula sp.	1396141	aliases:BATP01000039_GENE1303
469382.Hbor_07120	Hbor_07120	Halogeometricum borinquense	469382	aliases:ADQ66310.1,HBO:HBOR_07120,ADQ66310,E4NN80,CONSERVED HYPOTHETICAL PROTEIN TIGR00486,312291850,GI:312291850,HBOR_07120,E4NN80_HALBP
1089549.AZUQ01000001_gene2038	1089549.AZUQ01000001_gene2038	Haloglycomyces albus	1089549	aliases:AZUQ01000001_GENE2038
1210908.HSB1_28890	HSB1_28890	Halogranum salarium	1210908	aliases:EJN58808,HSB1_28890,J3A0F2_9EURY,J3A0F2,EJN58808.1,WP_009375673.1,399237878,GI:399237878
485914.Hmuk_1695	Hmuk_1695	Halomicrobium mukohataei	485914	aliases:8411218,C7P3Y7_HALMD,INTERPRO:IPR002678,C7P3Y7,257170050,HMUK_1695,HMU:HMUK_1695,GI:257170050,IPR002678,WP_015762653.1,PROTEIN OF UNKNOWN FUNCTION DUF34,ACV47809,ACV47809.1
232346.JHQL01000003_gene286	232346.JHQL01000003_gene286	Halomonas alkaliantarctica	232346	aliases:JHQL01000003_GENE286
1121939.L861_00605	L861_00605	Halomonas anticariensis	1121939	aliases:511275710,L861_00605,EPC03830,S2KPJ0_HALAF,S2KPJ0,GI:511275710,EPC03830.1,WP_016414562.1
768066.HELO_1939	ybgI	Halomonas elongata	768066	aliases:CBV41823,E1V9I9,INTERPRO:IPR002678,E1V9I9_HALED,307216553,GI:307216553,UNIPROTKB/TREMBL:E1V9I9,CBV41823.1,YBGI,HEL:HELO_1939,GTP CYCLOHYDROLASE DOMAIN PROTEIN YBGI,HELO_1939,IPR002678
1121940.AUDZ01000004_gene2555	1121940.AUDZ01000004_gene2555	Halomonas halocynthiae	1121940	aliases:AUDZ01000004_GENE2555
1238190.AMQY01000018_gene1319	1238190.AMQY01000018_gene1319	Halomonas jeotgali	1238190	aliases:AMQY01000018_GENE1319
1121943.KB899992_gene2279	1121943.KB899992_gene2279	Halomonas lutea	1121943	aliases:KB899992_GENE2279
42565.FP66_00130	FP66_00130	Halomonas salina	42565	aliases:A0A098RHV3_9GAMM,KGE79569,689732803,GI:689732803,METAL-BINDING PROTEIN,FP66_00130,KGE79569.1,A0A098RHV3,WP_035592426.1
1380358.JADJ01000010_gene469	1380358.JADJ01000010_gene469	Halomonas sp.	1380358	aliases:JADJ01000010_GENE469
1479235.KK366039_gene289	1479235.KK366039_gene289	Halomonas sp.	1479235	aliases:WP_027335392.1,KK366039_GENE289,A0A0P7YVA9_9GAMM,A0A0P7YVA9,HLUCCA13_03935
1397528.Q671_07345	Q671_07345	Halomonas sp.	1397528	aliases:Q671_07345,U7P314,WP_023005934.1,ERS89124,ERS89124.1,GI:550791365,550791365,METAL-BINDING PROTEIN,U7P314_9GAMM
1504981.KO116_0890	KFC05852.1	Halomonas sp.	1504981	aliases:KO116_0890,HAK:KO116_02682,A0A0D5M513_9GAMM,KFC05852.1,668720266,INTERPRO:IPR002678,KO116_02682,A0A0D5M513,NGG1P INTERACTING FACTOR 3 PROTEIN, NIF3,KFC05852,WP_035566306.1,AJY51157,GI:668720266,IPR002678
1415755.JQLV01000001_gene2061	1415755.JQLV01000001_gene2061	Halomonas sp.	1415755	aliases:JQLV01000001_GENE2061
1178482.BJB45_06020	ERL50688.1	Halomonas sp.	1178482	aliases:W1N585,545313474,GI:545313474,ERL50688.1,HHU:AR456_07375,BJB45_06020,ERL50688,W1N585_9GAMM,ALM52125,WP_021820741.1
1118153.MOY_12002	MOY_12002	Halomonas sp.	1118153	aliases:GI:359296168,359296168,WP_009100035.1,EHK60422,EHK60422.1,H0J438,MOY_12002,32534003,H0J438_9GAMM
999141.GME_03622	GME_03622	Halomonas sp.	999141	aliases:F7SJR4_9GAMM,GI:338766124,GME_03622,338766124,WP_009721990.1,EGP21051.1,F7SJR4,EGP21051
1166948.JPZL01000001_gene2441	1166948.JPZL01000001_gene2441	Halomonas xinjiangensis	1166948	aliases:JPZL01000001_GENE2441
574966.KB898646_gene3078	574966.KB898646_gene3078	Halomonas zhanjiangensis	574966	aliases:KB898646_GENE3078
926692.AZYG01000064_gene1047	926692.AZYG01000064_gene1047	Halonatronum saccharophilum	926692	aliases:AZYG01000064_GENE1047
926692.AZYG01000007_gene1297	926692.AZYG01000007_gene1297	Halonatronum saccharophilum	926692	aliases:AZYG01000007_GENE1297
1070774.J07HN4v3_00368	ERH08003.1	Halonotius sp.	1070774	aliases:DINUCLEAR METAL CENTER PROTEIN, YBGI/SA1388 FAMILY,J07HN4V3_00368,GI:541199842,541199842,U1QLY5,U1QLY5_9EURY,ERH08003,ERH08003.1
756883.Halar_2078	Halar_2078	halophilic archaeon	756883	aliases:HALAR_2078,11095440,344320908,AEN05762.1,HAH:HALAR_2078,GI:344320908,NGG1P INTERACTING FACTOR 3 PROTEIN, NIF3,INTERPRO:IPR002678,G2MLT5_9ARCH,G2MLT5,AEN05762,WP_014051539.1,IPR002678
756883.Halar_1159	Halar_1159	halophilic archaeon	756883	aliases:AEN04915,11094504,WP_014050696.1,HAH:HALAR_1159,344320061,GI:344320061,G2MKG7_9ARCH,G2MKG7,AEN04915.1,HALAR_1159
1202768.JROF01000021_gene3532	1202768.JROF01000021_gene3532	Halopiger salifodinae	1202768	aliases:SAMN05216285_2903,JROF01000021_GENE3532,DINUCLEAR METAL CENTER PROTEIN, YBGI/SA1388 FAMILY,A0A1I0PT20_9EURY,A0A1I0PT20
1293048.CBMB010000004_gene2224	1293048.CBMB010000004_gene2224	Halopiger sp.	1293048	aliases:CBMB010000004_GENE2224
1293047.CBMA010000014_gene865	1293047.CBMA010000014_gene865	Halopiger sp.	1293047	aliases:CBMA010000014_GENE865
797210.Halxa_2144	Halxa_2144	Halopiger xanaduensis	797210	aliases:HXA:HALXA_2144,HALXA_2144,INTERPRO:IPR002678,GI:335337530,NGG1P INTERACTING FACTOR 3 PROTEIN, NIF3,AEH36769,F8D8L7_HALXS,335337530,F8D8L7,AEH36769.1,IPR002678
926690.KE386573_gene2496	926690.KE386573_gene2496	Haloplanus natans	926690	aliases:KE386573_GENE2496
1033810.HLPCO_000074	ERJ13423.1	Haloplasma contractile	1033810	aliases:U2EEN0,HLPCO_000074,SMS PROTEIN,GI:543106921,543106921,U2EEN0_9BACT,ERJ13423,ERJ13423.1
1033810.HLPCO_000901	ERJ13272.1	Haloplasma contractile	1033810	aliases:HLPCO_000901,ERJ13272.1,WP_008826718.1,U2DYD6,SMS PROTEIN,GI:543106754,ERJ13272,U2DYD6_9BACT,543106754
1238425.J07HQW2_01510	ERG95065.1	Haloquadratum walsbyi	1238425	aliases:U1NDK4_9EURY,GI:541186641,U1NDK4,541186641,ERG95065.1,ERG95065,J07HQW2_01510,DINUCLEAR METAL CENTER PROTEIN, YBGI/SA1388 FAMILY
362976.HQ_2853A	HQ_2853A	Haloquadratum walsbyi	362976	aliases:WP_011572072.1,Q18GD9,Q18GD9_HALWD,4194345,CAJ52960,PSEUDOCODING FRAME (HQIRS71 ELEMENT) (NONFUNCTIONAL),HQ_2853A,HWA:HQ_2853A,GTP CYCLOHYDROLASE 1 DOMAIN PROTEIN
1033806.HTIA_2338	nif3	Halorhabdus tiamatea	1033806	aliases:HTI:HTIA_2338,HLRTI_002145,23799116,NGG1P INTERACTING FACTOR 3, NIF3 FAMILY PROTEIN,INTERPRO:IPR002678,HTIA_2338,WP_008526708.1,CCQ34446,CCQ34446.1,GOA:F7PL63,UNIPROTKB/TREMBL:F7PL63,F7PL63_9EURY,F7PL63,IPR002678,GI:528527157,NIF3,NGG1P INTERACTING FACTOR 3 PROTEIN,528527157
519442.Huta_2576	Huta_2576	Halorhabdus utahensis	519442	aliases:256692402,ACV12739,8384881,WP_015790302.1,INTERPRO:IPR002678,C7NPI4_HALUD,ACV12739.1,HUT:HUTA_2576,C7NPI4,PROTEIN OF UNKNOWN FUNCTION DUF34,GI:256692402,HUTA_2576,IPR002678
349124.Hhal_2109	Hhal_2109	Halorhodospira halophila	349124	aliases:ABM62873,HHA:HHAL_2109,INTERPRO:IPR002678,PROTEIN OF UNKNOWN FUNCTION DUF34,WP_011814895.1,A1WYW1_HALHL,HHAL_2109,121590293,GI:121590293,ABM62873.1,A1WYW1,IPR002678
1121945.ATXS01000001_gene2404	1121945.ATXS01000001_gene2404	Halorubrum ezzemoulense	1121945	aliases:A0A1X4HAX9,A0A1X4HAX9_9EURY,NIF3-LIKE DINUCLEAR METAL CENTER HEXAMERIC PROTEIN,ATXS01000001_GENE2404,WP_049929750.1,B9H04_02525
413816.BBJP01000009_gene593	413816.BBJP01000009_gene593	Halorubrum halophilum	413816	aliases:BBJP01000009_GENE593
416348.Hlac_2161	Hlac_2161	Halorubrum lacusprofundi	416348	aliases:7401094,B9LR84_HALLT,HLA:HLAC_2161,ACM57738.1,INTERPRO:IPR002678,GI:222453473,ACM57738,B9LR84,PROTEIN OF UNKNOWN FUNCTION DUF34,HLAC_2161,WP_015910860.1,222453473,IPR002678
1227484.C471_04340	C471_04340	Halorubrum saccharovorum	1227484	aliases:ELZ42240,ELZ42240.1,C471_04340,M0E366_9EURY,WP_004046818.1,445690019,M0E366,GI:445690019
1227487.C474_04690	C474_04690	Halosarcina pallida	1227487	aliases:GI:445680907,ELZ33348,WP_008384459.1,ELZ33348.1,C474_04690,445680907,M0DEW0,M0DEW0_9EURY
797114.C475_11415	C475_11415	Halosimplex carlsbadense	797114	aliases:M0CR12,C475_11415,ELZ24842.1,M0CR12_9EURY,445672266,ELZ24842,WP_006883957.1,GI:445672266
797299.HALLA_16440	AHG00151.1	Halostagnicola larsenii	797299	aliases:WP_049953388.1,HALLA_16440,AHG00151.1,W0JN58,25146001,573481740,HLR:HALLA_16440,GI:573481740,AHG00151,W0JN58_9EURY
1230457.C476_05303	C476_05303	Haloterrigena limicola	1230457	aliases:C476_05303,WP_008010626.1,M0CLK9,445670664,ELZ23262,ELZ23262.1,GI:445670664,M0CLK9_9EURY
1227488.C477_08293	C477_08293	Haloterrigena salina	1227488	aliases:WP_008893975.1,ELZ19655,C477_08293,M0C8U6_9EURY,M0C8U6,445667003,ELZ19655.1,GI:445667003
543526.Htur_3106	Htur_3106	Haloterrigena turkmenica	543526	aliases:ADB61971.1,ADB61971,HTU:HTUR_3106,284016020,HTUR_3106,8743726,D2RZ03_HALTV,INTERPRO:IPR002678,GI:284016020,D2RZ03,WP_012944231.1,PROTEIN OF UNKNOWN FUNCTION DUF34,IPR002678
373903.Hore_12390	Hore_12390	Halothermothrix orenii	373903	aliases:GTP CYCLOHYDROLASE 1 TYPE 2 HOMOLOG,HORE_12390,B8CXH0,ACL69989.1,WP_012636173.1,219993386,B8CXH0_HALOH,HOR:HORE_12390,CONSERVED HYPOTHETICAL PROTEIN TIGR00486,GI:219993386,ACL69989
555778.Hneap_1137	Hneap_1137	Halothiobacillus neapolitanus	555778	aliases:GI:261836206,HNA:HNEAP_1137,INTERPRO:IPR002678,WP_012824009.1,ACX95973.1,261836206,D0KZV0_HALNC,PROTEIN OF UNKNOWN FUNCTION DUF34,ACX95973,IPR002678,HNEAP_1137,D0KZV0
797302.Halru_2214	Halru_2214	Halovivax ruber	797302	aliases:DINUCLEAR METAL CENTER PROTEIN, YBGI/SA1388 FAMILY,INTERPRO:IPR002678,GI:433290978,L0IF30_HALRX,AGB16801.1,HRU:HALRU_2214,433290978,HALRU_2214,AGB16801,L0IF30,IPR002678
1235990.HHS_07580	ybgI	Halyomorpha halys	1235990	aliases:WP_022564747.1,U3U9T5_9GAMM,BAO00728,U3U9T5,BAO00728.1,549073768,HHS_07580,YBGI,GI:549073768,HHS:HHS_07580,YBGI PROTEIN
1121946.AUAX01000054_gene6843	1121946.AUAX01000054_gene6843	Hamadaea tsunoensis	1121946	aliases:AUAX01000054_GENE6843
8153.XP_005947405.1	8153.XP_005947405.1	Haplochromis burtoni	8153	aliases:102296160,XM_005947343.1,XP_005947405,XP_005947405.1,NIF3-LIKE PROTEIN 1-LIKE ISOFORM X1,GENEID:102296160,GI:554875014,554875014,LOC102296160
883114.HMPREF9709_01238	EHR33490.1	Helcococcus kunzii	883114	aliases:H3NPH7_9FIRM,WP_005398753.1,374562156,EHR33490,H3NPH7,HMPREF9709_01238,YBGI/FAMILY DINUCLEAR METAL CENTER PROTEIN,GI:374562156,EHR33490.1
1121947.AUHK01000013_gene618	1121947.AUHK01000013_gene618	Helcococcus sueciensis	1121947	aliases:AUHK01000013_GENE618
382638.Hac_1035	Hac_1035	Helicobacter acinonychis	382638	aliases:HAC:HAC_1035,Q17X27_HELAH,31758408,HAC_1035,3.5.4.16,GI:109714791,CAJ99799.1,UNIPROTKB/TREMBL:Q17X27,WP_011577909.1,Q17X27,109714791,INTERPRO:IPR002678,CAJ99799,EC 3.5.4.16,IPR002678
1002804.HBZC1_02370	CCB79223.1	Helicobacter bizzozeronii	1002804	aliases:F8KR49_HELBC,F8KR49,CCB79223,3.5.4.16,GI:335332496,335332496,CCB79223.1,HBZC1_02370,EC 3.5.4.16,HBI:HBZC1_02370
1002804.HBZC1_02360	CCB79222.1	Helicobacter bizzozeronii	1002804	aliases:CCB79222,F8KR48,3.5.4.16,335332495,HBZC1_02360,GI:335332495,F8KR48_HELBC,CCB79222.1,HBI:HBZC1_02360,FIG137478: HYPOTHETICAL PROTEIN,EC 3.5.4.16
537970.HCAN_1307	HCAN_1307	Helicobacter canadensis	537970	aliases:253511357,GI:253511357,WP_006656359.1,EES90016.1,C5ZXZ8_9HELI,EES90016,C5ZXZ8,HCAN_1307
1357399.HMPREF2087_00177	ETD27268.1	Helicobacter canis	1357399	aliases:ETD27268,564727290,YBGI/FAMILY DINUCLEAR METAL CENTER PROTEIN,V8CIN5_9HELI,ETD27268.1,WP_023929073.1,HMPREF2087_00177,GI:564727290,V8CIN5
1163745.HCD_06500	HCD_06500	Helicobacter cetorum	1163745	aliases:WP_014659787.1,I0ETN3,3.5.4.16,GI:384554546,AFI06302,AFI06302.1,HCD_06500,384554546,HCM:HCD_06500,I0ETN3_HELCM,EC 3.5.4.16
182217.HCW_05570	HCW_05570	Helicobacter cetorum	182217	aliases:GI:384556042,I0EN57,3.5.4.16,AFI04376.1,I0EN57_HELC0,HCW_05570,384556042,AFI04376,HCE:HCW_05570,WP_014661246.1,EC 3.5.4.16
1172562.HCN_0265	HCN_0265	Helicobacter cinaedi	1172562	aliases:GI:385146076,385146076,BAM11584,3.5.4.16,HCP:HCN_0265,HCN_0265,BAM11584.1,EC 3.5.4.16
537971.HCCG_01918	EFR47370.1	Helicobacter cinaedi	537971	aliases:EFR47370.1,HCBAA847_0270,WP_002957257.1,I7H4D4_9HELI,3.5.4.16,I7H4D4,DINUCLEAR METAL CENTER PROTEIN, YBGI FAMILY,HCCG_01918,HCB:HCBAA847_0270,EFR47370,313129753,GI:313129753,EC 3.5.4.16,BAM31520
936155.HFELIS_09600	CBY83044.1	Helicobacter felis	936155	aliases:E7ACL3_HELFC,CBY83044,315132416,CBY83044.1,HFE:HFELIS_09600,3.5.4.16,PUTATIVE HYPOTHETICAL PROTEIN,GI:315132416,HFELIS_09600,UNIPROTKB/TREMBL:E7ACL3,INTERPRO:IPR002678,E7ACL3,EC 3.5.4.16,IPR002678
1325130.HFN_0415	HFN_0415	Helicobacter fennelliae	1325130	aliases:GAD19284,WP_023948520.1,T1CRA3,GI:522683111,T1CRA3_9HELI,HFN_0415,GAD19284.1,522683111
235279.HH_0638	HH_0638	Helicobacter hepaticus	235279	aliases:Q7VIG7_HELHP,WP_011115480.1,Q7VIG7,3.5.4.16,32262187,HH_0638,AAP77235.1,HHE:HH_0638,AAP77235,GI:32262187,EC 3.5.4.16
1357400.HMPREF2086_01719	ETD22918.1	Helicobacter macacae	1357400	aliases:564722895,ETD22918.1,V8C681_9HELI,V8C681,ETD22918,HMPREF2086_01719,GI:564722895
679897.HMU13460	HMU13460	Helicobacter mustelae	679897	aliases:CBG40600.1,HMU13460,HMS:HMU13460,GI:290964745,3.5.4.16,D3UJC5,290964745,UNIPROTKB/TREMBL:D3UJC5,PUTATIVE HYPOTHETICAL PROTEIN,INTERPRO:IPR002678,CBG40600,D3UJC5_HELM1,EC 3.5.4.16,IPR002678
1408442.JADE01000010_gene540	1408442.JADE01000010_gene540	Helicobacter pametensis	1408442	aliases:JADE01000010_GENE540
537972.ABQU01000085_gene1284	HPMG_01830	Helicobacter pullorum	537972	aliases:WP_005023340.1,ABQU01000085_GENE1284,C5F279_9HELI,C5F279,DINUCLEAR METAL CENTER PROTEIN, YBGI FAMILY,HPMG_01830,29688872
1345592.CBOM010000016_gene1179	EG63_04675	Helicobacter pylori	1345592	aliases:EG63_04675,A0A024C070_HELPX,WP_038417822.1,A0A024C070,CBOM010000016_GENE1179
85962.C694_04940	HP_0959	Helicobacter pylori	85962	aliases:899492,409894115,HP_0959,GTP CYCLOHYDROLASE 1 TYPE 2,WP_001229797.1,3.5.4.16,GTPC1_HELPY,HEO:C694_04940,C694_04940,AFV42173,GTP CYCLOHYDROLASE I,NP_207751.1,GI:409894115,AFV42173.1,O25613,EC 3.5.4.16
85963.jhp_0893	jhp_0893	Helicobacter pylori	85963	aliases:WP_001229751.1,GTP CYCLOHYDROLASE 1 TYPE 2,HPJ:JHP_0893,AAD06461.1,3.5.4.16,PUTATIVE,JHP_0893,GTP CYCLOHYDROLASE I,AAD06461,GTPC1_HELPJ,4155458,GI:4155458,Q9ZKP2,EC 3.5.4.16
907239.HPSA_04815	HPSA_04815	Helicobacter pylori	907239	aliases:ADU84943,GI:317011196,3.5.4.16,ADU84943.1,317011196,E8QSH9_HELPW,E8QSH9,WP_001229760.1,HPSA_04815,EC 3.5.4.16,HES:HPSA_04815
1449345.JHWC01000001_gene227	1449345.JHWC01000001_gene227	Helicobacter rodentium	1449345	aliases:JHWC01000001_GENE227
425400.LS65_04475	LS65_04475	Helicobacter sp.	425400	aliases:KGI54930.1,GI:693437011,WP_034361539.1,693437011,LS65_04475,A0A099BFU4,KGI54930,A0A099BFU4_9HELI
1548151.LS70_05720	LS70_05720	Helicobacter sp.	1548151	aliases:KGL11164,A0A099TQY9,696164133,A0A099TQY9_9HELI,GI:696164133,KGL11164.1,WP_034289647.1,LS70_05720
710393.HSUHS1_0152	EFX43539.1	Helicobacter suis	710393	aliases:HSUHS1_0152,EFX43539,EFX43539.1,GI:321149090,321149090
50960.LS81_10660	LS80_00590	Helicobacter trogontum	50960	aliases:LS80_00590,A0A099VQR4,WP_034316867.1,A0A099VQR4_9HELI,YBGI/FAMILY DINUCLEAR METAL CENTER PROTEIN,LS81_10660
34740.HMEL003333-PA	34740.HMEL003333-PA	Heliconius melpomene	34740	aliases:HMEL003333-RA,UPI000276F0BC,HMEL003333-PA,HMEL003333,PWY-6147,UPA00848,PWY-7442,PWY-6983,PWY-5664,PWY-6703,PWY-5663
498761.HM1_2515	HM1_2515	Heliobacterium modesticaldum	498761	aliases:ABZ85063.1,ABZ85063,HMO:HM1_2515,HM1_2515,B0TAV2,GI:167593315,167593315,B0TAV2_HELMI
498761.HM1_1998	HM1_1998	Heliobacterium modesticaldum	498761	aliases:GTP CYCLOHYDROLASE 1 TYPE 2 HOMOLOG,B0TG59_HELMI,HM1_1998,B0TG59,HMO:HM1_1998,ABZ84555,GI:167592807,WP_012283056.1,167592807,ABZ84555.1
498761.HM1_1801	HM1_1801	Heliobacterium modesticaldum	498761	aliases:ABZ84366,HMO:HM1_1801,GI:167592618,B0TEW4_HELMI,HM1_1801,167592618,WP_012282870.1,B0TEW4,ABZ84366.1
6412.HelroP105066	20194705	Helobdella robusta	6412	aliases:HELROT105066,XP_009014825.1,HELROG105066,ESTEXT_GENEWISE1.C_1840001,HELROP105066,T1EDQ3,XP_009014825,UPI000355F743,HELRODRAFT_105066,HRO:HELRODRAFT_105066,T1EDQ3_HELRO,20194705
864073.HFRIS_002219	EOA06537.1	Herbaspirillum frisingense	864073	aliases:481871772,HFRIS_002219,EOA06537,GI:481871772,R0GDF6,EOA06537.1,R0GDF6_9BURK
1095769.CAHF01000003_gene989	1095769.CAHF01000003_gene989	Herbaspirillum massiliense	1095769	aliases:CAHF01000003_GENE989
757424.Hsero_4051	Hsero_4051	Herbaspirillum seropedicae	757424	aliases:ADJ65521,D8ISV5,HSE:HSERO_4051,HSERO_4051,GI:300076122,ADJ65521.1,D8ISV5_HERSS,WP_013235980.1,300076122,29394179
1175306.GWL_34960	GWL_34960	Herbaspirillum sp.	1175306	aliases:I3CS75,GWL_34960,386433642,I3CS75_9BURK,EIJ46468.1,EIJ46468,GI:386433642
1144319.PMI16_02353	EJL88708.1	Herbaspirillum sp.	1144319	aliases:DINUCLEAR METAL CENTER PROTEIN, YBGI/SA1388 FAMILY,EJL88708,J2LTI0_9BURK,INTERPRO:IPR002678,WP_007879654.1,GI:398098421,J2LTI0,EJL88708.1,PMI16_02353,IPR002678,398098421
1144342.PMI40_02754	EJN03377.1	Herbaspirillum sp.	1144342	aliases:GI:398216836,DINUCLEAR METAL CENTER PROTEIN, YBGI/SA1388 FAMILY,INTERPRO:IPR002678,EJN03377.1,WP_008115852.1,EJN03377,J2VBQ2,398216836,J2VBQ2_9BURK,PMI40_02754,IPR002678
28444.JODQ01000007_gene5671	28444.JODQ01000007_gene5671	Herbidospora cretacea	28444	aliases:JODQ01000007_GENE5671
204773.HEAR3055	HEAR3055	Herminiimonas arsenicoxydans	204773	aliases:CAL63164,HEAR3055,UNIPROTKB/TREMBL:A4G9H7,INTERPRO:IPR002678,A4G9H7,WP_011872419.1,HAR:HEAR3055,133740113,CAL63164.1,A4G9H7_HERAR,GI:133740113,IPR002678
316274.Haur_2571	Haur_2571	Herpetosiphon aurantiacus	316274	aliases:A9B0A0,A9B0A0_HERA2,INTERPRO:IPR002678,PROTEIN OF UNKNOWN FUNCTION DUF34,ABX05209,ABX05209.1,HAU:HAUR_2571,GI:159892129,IPR002678,HAUR_2571,159892129
316274.Haur_3238	Haur_3238	Herpetosiphon aurantiacus	316274	aliases:159892795,A9B707_HERA2,ABX05875.1,HAUR_3238,INTERPRO:IPR002678,A9B707,GI:159892795,HAU:HAUR_3238,ABX05875,PROTEIN OF UNKNOWN FUNCTION DUF34,IPR002678
984962.XP_009540741.1	984962.XP_009540741.1	Heterobasidion irregulare	984962	aliases:HETIRDRAFT_413128,W4KLP7_9HOMO,XM_009542446.1,XP_009540741.1,W4KLP7,GENEID:20673092,HIR:HETIRDRAFT_413128,INTERPRO:IPR002678,20673092,695531906,GI:695531906,XP_009540741,HETAN2_413128,JGIDB:HETAN2_413128,IPR002678
10181.XP_004871705.1	Nif3l1	Heterocephalus glaber	10181	aliases:GENEID:101717884,101717884,513020838,GI:513020844,XM_004871649.1,GI:513020840,GI:513020842,XP_004871705.1,10181,238909,GENEID:101718919,513020844,513020842,513020840,XP_004871705,101718919,NIF3L1,GI:513020838,HGL:101718919,CDD:238909,NGG1 INTERACTING FACTOR 3 LIKE 1,TAXON:10181,NIF3-LIKE PROTEIN 1 ISOFORM X1,XP_012923569
944480.ATUV01000001_gene1516	944480.ATUV01000001_gene1516	Hippea alviniae	944480	aliases:ATUV01000001_GENE1516
944479.JQLX01000014_gene1555	944479.JQLX01000014_gene1555	Hippea jasoniae	944479	aliases:JQLX01000014_GENE1555
760142.Hipma_1247	Hipma_1247	Hippea maritima	760142	aliases:F2LX24,HIPMA_1247,F2LX24_HIPMA,HMR:HIPMA_1247,AEA34208,NGG1P INTERACTING FACTOR 3 PROTEIN, NIF3,327182027,GI:327182027,AEA34208.1
944481.JAFP01000001_gene1356	944481.JAFP01000001_gene1356	Hippea sp.	944481	aliases:JAFP01000001_GENE1356
5037.XP_001539811.1	HCDG_02134	Histoplasma capsulatum	5037	aliases:C6H6T3_AJECH,NGG1 INTERACTING FACTOR NIF3,GENEID:5445979,AJE:HCAG_05278,HCAG_05278,GI:154277964,154277964,HCDG_02134,XP_001539811.1,C6H6T3,XP_001539811,5445979,XM_001539761.1
545696.HOLDEFILI_00247	EEF69567.1	Holdemania filiformis	545696	aliases:B9Y372_9FIRM,HOLDEFILI_00247,INTERPRO:IPR002678,B9Y372,EEF69567.1,223965284,NIF3 (NGG1P INTERACTING FACTOR 3),GI:223965284,EEF69567,IPR002678
545696.HOLDEFILI_00619	EEF69193.1	Holdemania filiformis	545696	aliases:223964876,HOLDEFILI_00619,GI:223964876,EEF69193,INTERPRO:IPR002678,B9Y488,EEF69193.1,B9Y488_9FIRM,IPR002678
545696.HOLDEFILI_00713	EEF69162.1	Holdemania filiformis	545696	aliases:EEF69162,HOLDEFILI_00713,INTERPRO:IPR002678,WP_006057923.1,GI:223964844,B9Y4I2_9FIRM,B9Y4I2,EEF69162.1,IPR002678,223964844
1211819.CALK01000043_gene1879	1211819.CALK01000043_gene1879	Holdemania massiliensis	1211819	aliases:CALK01000043_GENE1879
1211819.CALK01000029_gene2067	1211819.CALK01000029_gene2067	Holdemania massiliensis	1211819	aliases:CALK01000029_GENE2067
1211819.CALK01000028_gene1954	1211819.CALK01000028_gene1954	Holdemania massiliensis	1211819	aliases:CALK01000028_GENE1954
9606.ENSP00000386394	NIF3L1	Homo sapiens	9606	aliases:NM_001142356,Q53TX4,NM_001142355,BAB14551.1,Q9GZT8,NM_001142355.1,OTTHUMP00000206189,EAW70227.1,EAW70224.1,OTTHUMG00000154588,AAY14724.1,NM_001142356.1,NIF3L_HUMAN,CAH56370.1,OTTHUMT00000336206,OTTHUMT00000336205,OTTHUMT00000336204,OTTHUMT00000336202,OTTHUMT00000336201,OTTHUMT00000336200,EAW70226.1,MY018,AAH07654.1,UPI0001881979,UPI0001881978,ENSP00000399336,ENSP00000386394,NIF3 NGG1 INTE…
1121952.ATXT01000011_gene2919	1121952.ATXT01000011_gene2919	Humibacter albus	1121952	aliases:ATXT01000011_GENE2919
6087.XP_002157131.2	6087.XP_002157131.2	Hydra vulgaris	6087	aliases:XP_012558713,XP_002157131,EC 2.3.2.27,HMG:100215936,E3 UBIQUITIN-PROTEIN LIGASE RNF25-LIKE,XM_002157095.2,GENEID:100215936,GI:449677314,2.3.2.27,XP_002157131.2,449677314,LOC100215936,100215936
1458275.AZ34_15070	AZ34_15070	Hylemonella gracilis	1458275	aliases:A0A016XM02_9BURK,AZ34_15070,WP_035611862.1,A0A016XM02,EYC52243,METAL-BINDING PROTEIN,GI:597959055,597959055,EYC52243.1
887062.HGR_15944	HGR_15944	Hylemonella gracilis	887062	aliases:HGR_15944,F3KXJ9,332039144,F3KXJ9_9BURK,WP_006299340.1,GI:332039144,EGI75566.1,EGI75566
1121957.ATVL01000009_gene1267	1121957.ATVL01000009_gene1267	Hymenobacter norwichensis	1121957	aliases:ATVL01000009_GENE1267
1356852.N008_16810	N008_16810	Hymenobacter sp.	1356852	aliases:GTP CYCLOHYDROLASE 1 TYPE 2 HOMOLOG,AII53628.1,A0A076HX27,670937669,A0A076HX27_9BACT,HYM:N008_16810,GI:670937669,WP_044017506.1,N008_16810,AII53628
1227739.Hsw_2399	Hsw_2399	Hymenobacter swuensis	1227739	aliases:AHJ97994,HSW_2399,W8EY27,GI:586956260,586956260,GTP CYCLOHYDROLASE 1 TYPE 2 HOMOLOG,AHJ97994.1,HSW:HSW_2399,W8EY27_9BACT
43179.ENSSTOP00000016021	NIF3L1	Ictidomys tridecemlineatus	43179	aliases:A0A287CSG0,XM_005338895.1,XM_005338895,ORIGIN RECOGNITION COMPLEX SUBUNIT 2,A0A287CSG0_ICTTR,XP_005338952,XP_005338952.1,101956515,XP_005338953.1,ENSSTOG00000019442,MDS015,ENSSTOT00000022579,UPI00025DB02B,NIF3 NGG1 INTERACTING FACTOR 3-LIKE 1 (S. CEREVISIAE),I3MV76_ICTTR,XP_013220032.1,XP_013220053.1,NIF3-LIKE PROTEIN 1,ORC2,CALS-7,NIF3L1,ENSSTOP00000016021,I3MV76,NIF3L1-201,ALS2CR1
283942.IL1377	IL1377	Idiomarina loihiensis	283942	aliases:AAV82217,GI:56179495,ILO:IL1377,56179495,Q5QZ68,Q5QZ68_IDILO,AAV82217.1,NIF3,IL1377
435908.IDSA_04665	IDSA_04665	Idiomarina salinarum	435908	aliases:KFZ31974,WP_034774574.1,GI:683407535,KFZ31974.1,A0A094J1N9_9GAMM,683407535,A0A094J1N9,METAL-BINDING PROTEIN,IDSA_04665
1517416.IDAT_01745	IDAT_01745	Idiomarina sp.	1517416	aliases:KFZ29842,A0A094IRV6_9GAMM,683402296,GI:683402296,KFZ29842.1,METAL-BINDING PROTEIN,A0A094IRV6,WP_034729680.1,IDAT_01745
1036674.A28LD_1416	A28LD_1416	Idiomarina sp.	1036674	aliases:F7RYT2_9GAMM,EGN74955.1,DINUCLEAR METAL CENTER PROTEIN, YBGI/SA1388 FAMILY,INTERPRO:IPR002678,EGN74955,F7RYT2,WP_007420388.1,336281683,GI:336281683,A28LD_1416,IPR002678
740709.A10D4_01682	EKE86912.1	Idiomarina xiamenensis	740709	aliases:K2KJN1_9GAMM,WP_008487318.1,NIF3 FAMILY PROTEIN,EKE86912,GI:407217076,407217076,EKE86912.1,K2KJN1,A10D4_01682
1111732.AZOD01000011_gene565	1111732.AZOD01000011_gene565	Ignatzschineria larvae	1111732	aliases:AZOD01000011_GENE565
945713.IALB_0320	IALB_0320	Ignavibacterium album	945713	aliases:AFH48032.1,IALB_0320,WP_014559191.1,AFH48032,IAL:IALB_0320,I0AGC5,GI:383800952,GTP CYCLOHYDROLASE 1 TYPE 2 HOMOLOG,383800952,I0AGC5_IGNAJ
572544.Ilyop_0190	Ilyop_0190	Ilyobacter polytropus	572544	aliases:E3H883,GTP CYCLOHYDROLASE 1 TYPE 2 HOMOLOG,IPO:ILYOP_0190,PROTEIN OF UNKNOWN FUNCTION DUF34,E3H883_ILYPC,ILYOP_0190,ADO81979,ADO81979.1,GI:309747317,309747317
946077.W5A_05793	W5A_05793	Imtechella halotolerans	946077	aliases:GTP CYCLOHYDROLASE 1 TYPE 2 HOMOLOG,WP_008238345.1,I0WH37_9FLAO,GI:383836290,383836290,W5A_05793,EID75703.1,I0WH37,EID75703
1189612.A33Q_3145	A33Q_3145	Indibacter alkaliphilus	1189612	aliases:GTP CYCLOHYDROLASE 1 TYPE 2 HOMOLOG,GI:509711629,S2E118_9BACT,S2E118,EOZ95783.1,WP_009033545.1,509711629,A33Q_3145,EOZ95783
445973.CLOBAR_01746	EDQ95979.1	Intestinibacter bartlettii	445973	aliases:GI:164602514,WP_007286838.1,INTERPRO:IPR011322,CLOBAR_01746,INTERPRO:IPR002678,SAMN02745147_0654,B0ABJ6,DINUCLEAR METAL CENTER PROTEIN, YBGI FAMILY,GTP CYCLOHYDROLASE 1 TYPE 2 HOMOLOG,B0ABJ6_9FIRM,164602514,IPR011322,EDQ95979,EDQ95979.1,IPR002678
1297617.JPJD01000009_gene2948	1297617.JPJD01000009_gene2948	Intestinimonas butyriciproducens	1297617	aliases:JPJD01000009_GENE2948,A0A0S2W3W7_9FIRM,WP_058117721.1,IB211_01661C,IBU:IB211_01661C,UPF0135 PROTEIN BSU YQFO OR BSU YQFO NIF3/CUTA DOMAIN,A0A0S2W3W7,ALP94052
1380370.JIBA01000018_gene569	1380370.JIBA01000018_gene569	Intrasporangiaceae bacterium	1380370	aliases:JIBA01000018_GENE569
710696.Intca_2051	Intca_2051	Intrasporangium calvum	710696	aliases:INTCA_2051,WP_013492877.1,ICA:INTCA_2051,E6SCX4_INTC7,PROTEIN OF UNKNOWN FUNCTION DUF34,ADU48562,E6SCX4,ADU48562.1,315589265,GI:315589265
1386089.N865_07770	N865_07770	Intrasporangium oryzae	1386089	aliases:586965792,EWT01737,W9G901,N865_07770,W9G901_9MICO,WP_034805136.1,EWT01737.1,GI:586965792
743718.Isova_1881	Isova_1881	Isoptericola variabilis	743718	aliases:GI:334107735,IVA:ISOVA_1881,AEG44625,F6FX25_ISOV2,INTERPRO:IPR002678,ISOVA_1881,NGG1P INTERACTING FACTOR 3 PROTEIN, NIF3,WP_013839017.1,F6FX25,AEG44625.1,334107735,IPR002678
743718.Isova_0035	Isova_0035	Isoptericola variabilis	743718	aliases:GI:334105963,F6FQA0_ISOV2,ISOVA_0035,INTERPRO:IPR002678,AEG42853.1,NGG1P INTERACTING FACTOR 3 PROTEIN, NIF3,WP_013837248.1,F6FQA0,IVA:ISOVA_0035,AEG42853,334105963,IPR002678
575540.Isop_2843	Isop_2843	Isosphaera pallida	575540	aliases:ISOP_2843,GTP CYCLOHYDROLASE 1 TYPE 2 HOMOLOG,E8R1J1_ISOPI,ADV63409.1,ADV63409,WP_013565697.1,319751649,E8R1J1,PROTEIN OF UNKNOWN FUNCTION DUF34,IPA:ISOP_2843,GI:319751649
51337.XP_004653641.1	Nif3l1	Jaculus jaculus	51337	aliases:XP_004653641.1,NIF3-LIKE PROTEIN 1,GI:507539259,XP_004653641,GENEID:101593966,NIF3L1,507539259,XM_004653584.1,101593966
1210046.B277_11320	B277_11320	Janibacter hoylei	1210046	aliases:EKA60765.1,404555269,B277_11320,K1DWA3_9MICO,GI:404555269,K1DWA3,EKA60765
1210046.B277_14429	B277_14429	Janibacter hoylei	1210046	aliases:EKA60177,K1E472_9MICO,GI:404554656,404554656,EKA60177.1,B277_14429,K1E472
313589.JNB_04545	JNB_04545	Janibacter sp.	313589	aliases:84383530,JNB_04545,EAP99411.1,WP_009775219.1,A3TM06,EAP99411,A3TM06_9MICO,CDD:17042,17042,GI:84383530
375286.mma_3274	mma_3274	Janthinobacterium sp.	375286	aliases:GI:151281417,MMA_3274,ABR89827.1,A6T367_JANMA,A6T367,WP_012081117.1,151281417,ABR89827,UNCHARACTERIZED CONSERVED PROTEIN,MMS:MMA_3274
504487.JCM19302_3084	GAL71594.1	Jejuia pallidilutea	504487	aliases:GAL71594.1,JCM19538_1565,A0A090VY43_9FLAO,GAL71594,GI:693563090,693563090,JCM19301_306,JCM19302_3084,A0A090VY43,WP_042245071.1,GTP CYCLOHYDROLASE 1 TYPE 2 HOMOLOG,HYPOTHETICAL PROTEIN YBGI
504487.JCM19302_3083	GAL71593.1	Jejuia pallidilutea	504487	aliases:GI:693563089,693563089,GAL71593,JCM19302_3083,GAL71593.1,HYPOTHETICAL PROTEIN YBGI
1122128.AUEE01000006_gene1914	1122128.AUEE01000006_gene1914	Jeotgalicoccus marinus	1122128	aliases:AUEE01000006_GENE1914
1122129.AUEF01000001_gene701	1122129.AUEF01000001_gene701	Jeotgalicoccus psychrophilus	1122129	aliases:AUEF01000001_GENE701
1461582.BN1048_00764	CEA00001.1	Jeotgalicoccus sp.	1461582	aliases:A0A078M5L5,PUTATIVE GTP CYCLOHYDROLASE 1 TYPE 2,GTP CYCLOHYDROLASE 1 TYPE 2 HOMOLOG,GI:685076163,CEA00001,685076163,BN1048_00764,WP_035808624.1,CEA00001.1,A0A078M5L5_9STAP
679200.HMPREF9333_01869	EHI55022.1	Johnsonella ignava	679200	aliases:WP_005541668.1,EHI55022.1,G5GJX9,GI:356693343,356693343,EHI55022,G5GJX9_9FIRM,HMPREF9333_01869
471856.Jden_1498	Jden_1498	Jonesia denitrificans	471856	aliases:WP_015771775.1,C7R4X7,C7R4X7_JONDD,INTERPRO:IPR002678,JDEN_1498,JDE:JDEN_1498,256686254,GI:256686254,PROTEIN OF UNKNOWN FUNCTION DUF34,ACV09147.1,IPR002678,ACV09147
1122130.AUHN01000010_gene173	1122130.AUHN01000010_gene173	Jonesia quinghaiensis	1122130	aliases:AUHN01000010_GENE173
885272.JonanDRAFT_1001	EHM13373.1	Jonquetella anthropi	885272	aliases:H0UL14,EHM13373,JONANDRAFT_1001,363986543,INTERPRO:IPR002678,H0UL14_9BACT,IPR002678,EHM13373.1,GI:363986543
645512.GCWU000246_01246	EEX47933.1	Jonquetella anthropi	645512	aliases:C9M8U3_9BACT,260629739,EEX47933,INTERPRO:IPR002678,GI:260629739,GCWU000246_01246,EEX47933.1,DINUCLEAR METAL CENTER PROTEIN, YBGI FAMILY,WP_008521444.1,C9M8U3,IPR002678
926559.JoomaDRAFT_1915	EIJ38913.1	Joostella marina	926559	aliases:GTP CYCLOHYDROLASE 1 TYPE 2 HOMOLOG,DINUCLEAR METAL CENTER PROTEIN, YBGI/SA1388 FAMILY,INTERPRO:IPR017221,JOOMADRAFT_1915,INTERPRO:IPR002678,WP_008612230.1,GI:386425083,IPR017221,I3C5M0,386425083,IPR002678,I3C5M0_9FLAO,EIJ38913,EIJ38913.1
1118059.CAHC01000009_gene1199	1118059.CAHC01000009_gene1199	Kallipyga massiliensis	1118059	aliases:CAHC01000009_GENE1199
1410658.JHWI01000004_gene247	1410658.JHWI01000004_gene247	Kandleria vitulina	1410658	aliases:A0A1H2QRB6,JHWI01000004_GENE247,DINUCLEAR METAL CENTER PROTEIN, YBGI/SA1388 FAMILY,SAMN04487759_103107,WP_074685633.1,A0A1H2QRB6_9FIRM
432096.XP_003959467.1	432096.XP_003959467.1	Kazachstania africana	432096	aliases:H2B132,13883981,XP_003959467.1,GI:410083779,INTERPRO:IPR002678,KAF:KAFR_0J02680,KAFR0J02680,H2B132_KAZAF,XM_003959418.1,XP_003959467,410083779,UNIPROTKB/TREMBL:H2B132,KAFR_0J02680,GENEID:13883981,IPR002678
588726.J7RUK4	588726.J7RUK4	Kazachstania naganishii	588726	aliases:J7RUK4,KNAG_0B00480,KNAG0B00480,J7RUK4_KAZNA
[truncated: 2,169 more rows]

## Sheet: a.2
EggNog ID	Gene Name	Organism	tax ID	Aliases
411902.CLOBOL_00660	EDP19224.1	[Clostridium] bolteae	411902	aliases:EDP19224,EDP19224.1,158441514,A8RID0_CLOBW,GI:158441514,CLOBOL_00660,A8RID0,WP_002567014.1
742733.HMPREF9469_04452	EHE96779.1	[Clostridium] citroniae	742733	aliases:EHE96779,EHE96779.1,HMPREF9469_04452,G5HP76_9FIRM,354812159,G5HP76,GI:354812159
742735.HMPREF9467_00540	EHG33685.1	[Clostridium] clostridioforme	742735	aliases:355386648,GI:355386648,EHG33685,A0A227LTX6,CYTOCHROME C BIOGENESIS PROTEIN,ADH76_07170,A0A227LTX6_9FIRM,EHG33685.1,HMPREF9467_00540,WP_002594898.1
1408823.AXUS01000004_gene134	1408823.AXUS01000004_gene134	[Clostridium] mangenotii	1408823	aliases:AXUS01000004_GENE134
1121334.KB911069_gene1628	1121334.KB911069_gene1628	[Clostridium] sporosphaeroides	1121334	aliases:KB911069_GENE1628
1121344.JHZO01000001_gene532	1121344.JHZO01000001_gene532	[Clostridium] viride	1121344	aliases:JHZO01000001_GENE532
633697.EubceDRAFT1_2865	EIM58556.1	[Eubacterium] cellulosolvens	633697	aliases:EIM58556,I5AXN3_EUBCE,INTERPRO:IPR002678,389313623,WP_004604666.1,EUBCEDRAFT1_2865,EIM58556.1,GI:389313623,I5AXN3,IPR002678
470.IX87_09405	ABUW_1005	Acinetobacter baumannii	470	aliases:V5VCB8_ACIBA,NGG1P INTERACTING FACTOR NIF3,AIL78837,APD06_09670,CBI29_02889,A7M90_09810,LV38_02119,NGG1P INTERACTING FACTOR 3 PROTEIN, NIF3,V5VCB8,CAS83_18270,BGC29_03660,GI:675329317,CAT78_14220,AIL78837.1,BWP00_10820,B9X91_25880,A7N09_09255,PUTATIVE GTP CYCLOHYDROLASE 1 TYPE 2,CBE85_01900,APD31_00575,IX87_09405,WP_000916029.1,ABUW_1005,A7A65_08355,675329317,CHH39_09175,CEJ63_00825,B9X95…
1217648.F933_03060	F933_03060	Acinetobacter beijerinckii	1217648	aliases:480064789,ENW03660.1,ENW03660,N9F8N9_9GAMM,N9F8N9,F933_03060,GI:480064789
106648.BBLJ01000001_gene2330	106648.BBLJ01000001_gene2330	Acinetobacter bereziniae	106648	aliases:A0A0A8TIP4,WP_042087520.1,A0A0A8TIP4_ACIBZ,BBLJ01000001_GENE2330
1217715.F994_01900	F994_01900	Acinetobacter bohemicus	1217715	aliases:N8NY09_9GAMM,ENU19045,ENU19045.1,N8NY09,479867294,34390672,WP_004648354.1,GI:479867294,F994_01900
1120925.F941_01076	F941_01076	Acinetobacter bouvetii	1120925	aliases:ENV83448,480044139,GI:480044139,ENV83448.1,33092497,F941_01076,WP_005008690.1,N9DSI4_9GAMM,N9DSI4
1217652.F954_00898	ENV47835.1	Acinetobacter brisouii	1217652	aliases:F954_00898,480005934,ENV47835.1,ENV47835,GI:480005934
871585.BDGL_002017	ADY82603.1	Acinetobacter calcoaceticus	871585	aliases:YP_004996285,BDGL_002017,YP_004996285.1,ACC:BDGL_002017,ADY82603.1,F0KL45,ADY82603,WP_014207385.1,325123080,F0KL45_ACICP,GI:325123080,11636536
202952.BBLI01000001_gene19	F960_02471	Acinetobacter gerneri	202952	aliases:F960_02471,BBLI01000001_GENE19,N8ZNV3,N8ZNV3_9GAMM
1217656.F964_04105	F964_04105	Acinetobacter guillouiae	1217656	aliases:N8Y7S1,WP_004823167.1,N8Y7S1_ACIGI,ENV15380,ENV15380.1,F964_04105,34387959,479971124,GI:479971124
1217658.F987_01564	F987_01564	Acinetobacter gyllenbergii	1217658	aliases:V2UL79,WP_023270309.1,V2UL79_9GAMM,ESK50742,F987_01564,ESK50742.1,23002497,554745699,GI:554745699
1331660.L313_0182	L313_0182	Acinetobacter haemolyticus	1331660	aliases:WP_061396479.1,NGG1P INTERACTING FACTOR NIF3,L313_0182,GI:523908233,EPR90269,AYL20_00665,A0A137Y9E6,523908233,EPR90269.1,A0A137Y9E6_ACIHA
1341679.P253_00357	P253_00357	Acinetobacter indicus	1341679	aliases:V2UGW2_9GAMM,554744452,ESK49507,ESK49507.1,GI:554744452,V2UGW2,P253_00357,WP_005176621.1
575586.HMPREF0016_00392	EEY97309.1	Acinetobacter johnsonii	575586	aliases:D0SA72_ACIJO,262316271,HMPREF0016_00392,D0SA72,GI:262316271,EEY97309,EEY97309.1,WP_004693851.1
40215.BBOS01000001_gene830	L292_2843	Acinetobacter junii	40215	aliases:APU49996,BBOS01000001_GENE830,AJN:BVL33_06945,WP_004913544.1,L292_2843,S7Y4J6,S7Y4J6_ACIJU
1046625.AFQY01000001_gene186	1046625.AFQY01000001_gene186	Acinetobacter lwoffii	1046625	aliases:AFQY01000001_GENE186
575588.ACPN01000032_gene632	575588.ACPN01000032_gene632	Acinetobacter lwoffii	575588	aliases:WP_004279094.1,HMPREF0017_00712,D0STT8,ACPN01000032_GENE632,D0STT8_ACILW
981327.F925_02664	ENW23703.1	Acinetobacter lwoffii	981327	aliases:ENW23703.1,GI:480085226,480085226,F925_02664,ENW23703
1392540.P256_00889	P256_00889	Acinetobacter nectaris	1392540	aliases:554735286,V2TS67,P256_00889,GI:554735286,WP_023272470.1,ESK40437,V2TS67_9GAMM,ESK40437.1
436717.AOLE_04420	AOLE_04420	Acinetobacter oleivorans	436717	aliases:D8JED1,298699216,ACD:AOLE_04420,GI:298699216,ADI89781,WP_013197080.1,D8JED1_ACISD,ADI89781.1,AOLE_04420
575589.HMPREF0018_01361	EEY86788.1	Acinetobacter radioresistens	575589	aliases:EEY86788,HMPREF0018_01361,262298875,EEY86788.1,GI:262298875
421052.F945_00981	F945_00981	Acinetobacter rudis	421052	aliases:S3NB62_9GAMM,F945_00981,GI:514097322,EPF77315,S3NB62,EPF77315.1,514097322
487316.BBNM01000001_gene1742	487316.BBNM01000001_gene1742	Acinetobacter soli	487316	aliases:ASOL:BEN76_01490,APV34760,NGG1P INTERACTING FACTOR NIF3,31753852,WP_076032035.1,BEN76_01490,A0A1P8EEY9_9GAMM,BBNM01000001_GENE1742,A0A1P8EEY9
1509403.GW12_08060	GW12_08060	Acinetobacter sp.	1509403	aliases:GI:712287753,KGT48171.1,712287753,GW12_08060,A0A0A3W823,KGT48171,WP_034583901.1,A0A0A3W823_9GAMM
575564.HMPREF0014_02667	EEW98956.1	Acinetobacter sp.	575564	aliases:AJB47471,260405463,A0A0R1CAB5_ACINO,A0A0R1CAB5,EEW98956,WP_000916029.1,APC94_02145,EEW98956.1,HMPREF0014_02667,GI:260405463,ANO:RR32_04885,NGG1P INTERACTING FACTOR NIF3
981223.AIED01000002_gene2153	981223.AIED01000002_gene2153	Acinetobacter sp.	981223	aliases:AIED01000002_GENE2153
1217713.F993_02129	F993_02129	Acinetobacter sp.	1217713	aliases:F993_02129,479871772,ENU23260,GI:479871772,N8PA80,ENU23260.1,WP_004654570.1,N8PA80_9GAMM
[truncated: 613 more rows]

## Sheet: a.3
EggNog ID	Gene Name	Organism	tax ID	Aliases
[truncated: 343 more rows]

## Sheet: a.4
EggNog ID	Gene Name	Organism	tax ID	Aliases
[truncated: 126 more rows]

[truncated: 11 more sheets: b.1, b.2, b.3, b.4, c, d, e.1, e.2, f, g.1, g.2]
