# Supplementary material for: Comparative Genomic Analysis of the DUF34 Protein Family Suggests Role as a Metal Ion Chaperone or Insertase
Source: Preprints.org preprint supplement (doi:10.20944/preprints202107.0280.v1), 2021-07-13
Supplement: Supplementary file 10 [file Data Table 7.xlsx]

## Sheet: Content
Data Table 7		Reed et al., 2021
a.1	Input data for PCKF analysis of COG lists as determined by GCT NG webserver per taxonomic range
a.2	Input data for PCKF analysis of COG descriptions lists as determined by GCT NG webserver per taxonomic range
b.1	raw output data of text analysis performed via textalyser.net (seoscout.com/tools/keyword-analyzer/) for taxonomic range-specific COG lists
b.2	raw output data of text analysis performed via textalyser.net (seoscout.com/tools/keyword-analyzer/) for taxonomic range-specific COG description lists
b.3	COG description PCKF output with irrelevant/uninformative keywords and phrases removed
b.4	irrelevant/uninformative keywords and phrases removed from COG description PCKF output
c.1	formatted output of PCKF analysis for taxonomic range-specific COG lists
c.2	formatted output of PCKF analysis for taxonomic range-specific COG description lists
d.1	bacterial representative operons, COGs only
d.2	bacterial representative operons with cell coloring representative of metal status
e.1	archaeal representative operons, COGs only
e.2	archaeal representative operons with cell coloring representative of metal status

## Sheet: a.1
COG0327 | Gene Context Tool | acquired 09/02/2020		Query: COG0327; all selected (n organisms for output)	Rank-ordered COGs
Superkingdom	Phylum	Class	1	2	3	4	5	6	7	8	9	10	11	12	13	14	15	16	17	18	19	20	21	22	23	24	25	26	27	28	29	30	31	32	33	34	35	36	37	38	39	40	41	42	43	44	45	46	47
Bacteria (2)			COG0327	COG2384	COG1579	COG2384	COG1984	COG1540	COG0406	COG0328	COG0665	COG0568	COG0266	COG1194	COG0358	COG0752	COG1519	COG2195	COG1209	COG1898	COG0564	COG0079	COG3935	COG0423	COG0415	COG0240	COG3272	COG1897	COG0826	COG2039	COG1088	COG0648	COG0778	COG0541	COG3817	COG3819	COG0682	COG0041	COG0494	COG1430	COG0177	COG1196	COG0513	COG0699	COG0503	COG0655	COG1683	COG0335	COG1671
	Actinobacteria (201174)		COG0327	COG1579	COG0406	COG0328	COG0079	COG0494	COG0749	COG0258	COG3744	COG2966	COG1523	COG3707	COG4118	COG0452	COG0036	COG1104	COG1396	COG1387	COG0591	COG2378	COG0145	COG1028	COG0620	COG1160	COG1063	COG0346	COG3246	COG1940	COG2319	COG0730	COG0822	COG0344	COG1196	COG2905	COG0240	COG0720	COG0626	COG0146	COG2229	COG0477	COG3323	COG3217	COG4826	COG1175	COG0461	COG1486	COG0395
	Bacteroidetes (976)		COG0327	COG1579	COG0526	COG0457	COG0596	COG0205	COG2270	COG0173	COG2314	COG0225	COG2839	COG0147	COG0525	COG3842	COG0739	COG0037	COG0016	COG0177	COG0152	COG0178	COG1131	COG0789	COG2003	COG0513	COG0539	COG3228	COG2120	COG2304	COG0436	COG0390
	Chlamydiae (204428)		COG0327	COG1194	COG1164	COG0564
	Deinococcus-thermus (1297)		COG0327	COG0125	COG1430	COG0346	COG3823	COG0769	COG0607	COG3631	COG0225	COG1060	COG1023	COG0075	COG1427	COG0612	COG3387	COG0444	COG3429	COG0363	COG1600	COG1378	COG0747	COG0601	COG0364	COG1028	COG4608	COG1533	COG0645
	Firmicutes (1239)		COG0327	COG2384	COG0665	COG2195	COG0568	COG0358	COG3935	COG1209	COG1898	COG1579	COG1897	COG1671	COG0428	COG0513	COG0648	COG1806	COG1088	COG0751	COG0752	COG0177	COG0761	COG1227	COG0441	COG0542	COG0572	COG0232	COG1293	COG0328	COG1174	COG2755	COG1434	COG2010	COG0503	COG1108	COG0661	COG1159	COG3326	COG1381	COG4392	COG1121	COG1125	COG0760	COG1732	COG1426	COG0612	COG1524	COG0484
		Bacilli (91061)	COG0327	COG2384	COG0665	COG2195	COG1898	COG1209	COG3935	COG1088	COG0177	COG0568	COG1897	COG0513	COG0358	COG0648	COG0542	COG1671	COG0428	COG1806	COG2010	COG0503	COG0751	COG0752	COG1227	COG2755	COG1121	COG0656	COG0760	COG0761	COG0494	COG1108	COG1312	COG1853	COG4912	COG3326	COG0735	COG1802	COG1028	COG0596	COG1165	COG1434	COG0553	COG1169	COG1426	COG0351	COG3725	COG1524	COG4948
		Clostridia (186801)	COG0327	COG2384	COG1579	COG0568	COG0358	COG0661	COG0441	COG0272	COG0572	COG0232	COG3937	COG0328	COG1293	COG0655	COG0525	COG2094	COG1173	COG0826	COG1802	COG0747	COG1073	COG0601	COG0641	COG0596	COG0454	COG1124	COG2382	COG2211	COG1087	COG0639	COG4347	COG0116	COG1306	COG1796	COG1228	COG2846	COG1896	COG0217	COG1011	COG3103	COG1606	COG1194	COG1314
		Negativicutes (909932)	COG2384	COG0327	COG3481	COG1797	COG1284	COG0568	COG4542	COG0352	COG0110	COG0079	COG0406
	Fusobacteria (32066)		COG0327	COG0568	COG1191	COG0760	COG0358
	Planctomycetes (203682)		COG0327	COG0115	COG2309	COG0147	COG1716	COG1413	COG0673	COG0801
	Proteobacteria (1224)		COG0327	COG2049	COG1984	COG1540	COG1579	COG0266	COG1519	COG0564	COG0752	COG0240	COG0778	COG0682	COG0415	COG3272	COG2039	COG1683	COG0826	COG3817	COG0041	COG1196	COG3819	COG1127	COG2854	COG1837	COG5007	COG0500	COG0541	COG0335	COG0336	COG0767	COG0766	COG0228	COG0806	COG1463	COG0699	COG1366	COG1897	COG2873	COG1995	COG0491	COG3133	COG0236	COG1295	COG0625	COG0245	COG1290	COG0723
		Betaproteobacteria (28216)	COG0327	COG1995	COG2857	COG0477	COG0625	COG1290	COG0723	COG0102	COG0103	COG0491	COG0179	COG1322	COG1793	COG0583	COG2969	COG3039	COG2197	COG1188	COG1080	COG0634	COG3027	COG0157	COG1792	COG2352	COG2893	COG1925	COG0240	COG2821
		Deltaproteobacteria (28221)	COG0327	COG1579	COG0245	COG1211	COG0328	COG0008	COG0457	COG0215
		Epsilonproteobacteria (29547)	COG0327	COG1579	COG1519	COG0752	COG0564	COG0682	COG0240	COG0778	COG0826	COG0041	COG1196	COG0541	COG0228	COG1837	COG0335	COG0336	COG0806	COG0699	COG0695	COG1897	COG0457	COG2873	COG1578	COG0210	COG0236	COG1872	COG0739	COG0130	COG3708	COG1551	COG1947	COG0691	COG3200	COG1538	COG1432	COG0799	COG3696	COG1057	COG0666	COG0864	COG1393	COG1671	COG5124	COG0324	COG1917	COG0845	COG1706
		Gammaproteobacteria (1236)	COG0327	COG2049	COG1984	COG1540	COG0266	COG0415	COG3272	COG2039	COG1683	COG3817	COG3819	COG0500	COG5212	COG0767	COG0766	COG2854	COG1463	COG1127	COG4121	COG5007	COG3133	COG3113	COG0745	COG2205	COG2156	COG3380	COG0033	COG0582	COG3104	COG0330	COG1216	COG2216	COG0040	COG2060	COG5610	COG1982	COG1597	COG5002	COG0210	COG1366	COG0079	COG0617	COG1682	COG0271	COG2084	COG3103	COG0728
	Spirochaetes (203691)		COG0327	COG0597	COG1137	COG1496	COG1692	COG1452	COG1934	COG0766	COG2135	COG0392	COG0438	COG1820	COG0840	COG0426
	Tenericutes (544448)		COG0327	COG0568	COG0358	COG0423	COG2384	COG1381	COG0319	COG1159	COG2274	COG0344	COG0694	COG0648	COG0513	COG1284	COG0541	COG0162	COG0264	COG0052	COG1386	COG0544	COG0466	COG1354	COG1132	COG0596	COG4508	COG0225	COG0206	COG1112	COG0221	COG0693
	Thermodesulfobacteria (200940) / Thermotogae (200918)		COG0327	COG1579	COG1144	COG1014	COG1013	COG1763	COG2206	COG0603	COG1388	COG2220	COG0009	COG0735	COG0727	COG0674
Archaea (2157)			COG0327	COG2890	COG5431	COG4017	COG2016	COG0502	COG4016	COG4019	COG4015	COG0013	COG0640	COG1833	COG4018	COG0024	COG1672	COG4074	COG0010	COG1899	COG0231	COG5542	COG0671	COG0655	COG4085	COG0500	COG0076	COG4055	COG4054	COG0719	COG0311	COG1117	COG4218	COG4057	COG0589	COG4056	COG0615	COG4059	COG4058	COG1873	COG0581	COG1970	COG1348	COG0343	COG2896	COG0622	COG0628	COG1962	COG0834
	Crenarchaeota (28889)		COG0327
	Euryarchaeota (28890)		COG0327	COG2890	COG5431	COG4017	COG2016	COG0502	COG4016	COG4019	COG4015	COG0013	COG0640	COG1833	COG4018	COG0024	COG1672	COG4074	COG0010	COG1899	COG0231	COG5542	COG0671	COG0655	COG4085	COG0500	COG0076	COG4055	COG4054	COG0719	COG0311	COG1117	COG4218	COG4057	COG0589	COG4056	COG0615	COG4059	COG4058	COG1873	COG0581	COG1970	COG1348	COG0343	COG2896	COG0622	COG0628	COG1962	COG0834
	Thaumarchaeota (651137)		COG0327
[truncated: 104 more columns]

## Sheet: a.2
COG0327 | Gene Context Tool | acquired 09/02/2020		Query: COG0327; all selected (n organisms for output)	Rank-ordered COGs
Superkingdom	Phylum	Class	d1	d2	d3	d4	d5	d6	d7	d8	d9	d10	d11	d12	d13	d14	d15	d16	d17	d18	d19	d20	d21	d22	d23	d24	d25	d26	d27	d28	d29	d30	d31	d32	d33	d34	d35	d36	d37	d38	d39	d40	d41	d42	d43	d44	d45	d46	d47
Bacteria (2)			Uncharacterized conserved protein	Predicted SAM-dependent methyltransferase	Zn-ribbon protein, possibly nucleic acid-binding	Allophanate hydrolase subunit 1	Allophanate hydrolase subunit 2	Uncharacterized proteins, homologs of lactam utilization protein B	Fructose-2,6-bisphosphatase	Ribonuclease HI	Glycine/D-amino acid oxidases (deaminating)	DNA-directed RNA polymerase, sigma subunit (sigma70/sigma32)	Formamidopyrimidine-DNA glycosylase	A/G-specific DNA glycosylase	DNA primase (bacterial type)	Glycyl-tRNA synthetase, alpha subunit	3-deoxy-D-manno-octulosonic-acid transferase	Di- and tripeptidases	dTDP-glucose pyrophosphorylase	dTDP-4-dehydrorhamnose 3,5-epimerase and related enzymes	Pseudouridylate synthases, 23S RNA-specific	Histidinol-phosphate/aromatic aminotransferase and cobyric acid decarboxylase	Putative primosome component and related proteins	Glycyl-tRNA synthetase (class II)	Deoxyribodipyrimidine photolyase	Glycerol-3-phosphate dehydrogenase	Uncharacterized conserved protein	Homoserine trans-succinylase	Collagenase and related proteases	Pyrrolidone-carboxylate peptidase (N-terminal pyroglutamyl peptidase)	dTDP-D-glucose 4,6-dehydratase	Endonuclease IV	Nitroreductase	Signal recognition particle GTPase	Predicted membrane protein	Predicted membrane protein	Prolipoprotein diacylglyceryltransferase	Phosphoribosylcarboxyaminoimidazole (NCAIR) mutase	NTP pyrophosphohydrolases including oxidative damage repair enzymes	Uncharacterized conserved protein	Predicted EndoIII-related endonuclease	Chromosome segregation ATPases	Superfamily II DNA and RNA helicases	Predicted GTPases (dynamin-related)	Adenine/guanine phosphoribosyltransferases and related PRPP-binding proteins	Multimeric flavodoxin WrbA	Uncharacterized conserved protein	Ribosomal protein L19	Uncharacterized protein conserved in bacteria
	Actinobacteria (201174)		Uncharacterized conserved protein	Zn-ribbon protein, possibly nucleic acid-binding	Fructose-2,6-bisphosphatase	Ribonuclease HI	Histidinol-phosphate/aromatic aminotransferase and cobyric acid decarboxylase	NTP pyrophosphohydrolases including oxidative damage repair enzymes	DNA polymerase I - 3'-5' exonuclease and polymerase domains	5'-3' exonuclease (including N-terminal domain of PolI)	Uncharacterized protein conserved in bacteria	Uncharacterized conserved protein	Type II secretory pathway, pullulanase PulA and related glycosidases	Response regulator with putative antiterminator output domain	Antitoxin of toxin-antitoxin stability system	Phosphopantothenoylcysteine synthetase/decarboxylase	Pentose-5-phosphate-3-epimerase	Cysteine sulfinate desulfinase/cysteine desulfurase and related enzymes	Predicted transcriptional regulators	Histidinol phosphatase and related hydrolases of the PHP family	Na+/proline symporter	Predicted transcriptional regulator	N-methylhydantoinase A/acetone carboxylase, beta subunit	Dehydrogenases with different specificities (related to short-chain alcohol dehydrogenases)	Methionine synthase II (cobalamin-independent)	Predicted GTPases	Threonine dehydrogenase and related Zn-dependent dehydrogenases	Lactoylglutathione lyase and related lyases	Uncharacterized conserved protein	Transcriptional regulator/sugar kinase	FOG: WD40 repeat	Predicted permeases	NifU homolog involved in Fe-S cluster formation	Predicted membrane protein	Chromosome segregation ATPases	Predicted signal-transduction protein containing cAMP-binding and CBS domains	Glycerol-3-phosphate dehydrogenase	6-pyruvoyl-tetrahydropterin synthase	Cystathionine beta-lyases/cystathionine gamma-synthases	N-methylhydantoinase B/acetone carboxylase, alpha subunit	Predicted GTPase	Permeases of the major facilitator superfamily	Uncharacterized protein conserved in bacteria	Uncharacterized Fe-S protein	Serine protease inhibitor	ABC-type sugar transport systems, permease components	Orotate phosphoribosyltransferase	Alpha-galactosidases/6-phospho-beta-glucosidases, family 4 of glycosyl hydrolases	ABC-type sugar transport system, permease component
	Bacteroidetes (976)		Uncharacterized conserved protein	Zn-ribbon protein, possibly nucleic acid-binding	Thiol-disulfide isomerase and thioredoxins	FOG: TPR repeat	Predicted hydrolases or acyltransferases (alpha/beta hydrolase superfamily)	6-phosphofructokinase	Permeases of the major facilitator superfamily	Aspartyl-tRNA synthetase	Predicted membrane protein	Peptide methionine sulfoxide reductase	Uncharacterized protein conserved in bacteria	Anthranilate/para-aminobenzoate synthases component I	Valyl-tRNA synthetase	ABC-type spermidine/putrescine transport systems, ATPase components	Membrane proteins related to metalloendopeptidases	Predicted ATPase of the PP-loop superfamily implicated in cell cycle control	Phenylalanyl-tRNA synthetase alpha subunit	Predicted EndoIII-related endonuclease	Phosphoribosylaminoimidazolesuccinocarboxamide (SAICAR) synthase	Excinuclease ATPase subunit	ABC-type multidrug transport system, ATPase component	Predicted transcriptional regulators	DNA repair proteins	Superfamily II DNA and RNA helicases	Ribosomal protein S1	Uncharacterized protein conserved in bacteria	Uncharacterized proteins, LmbE homologs	Uncharacterized protein containing a von Willebrand factor type A (vWA) domain	Aspartate/tyrosine/aromatic aminotransferase	ABC-type uncharacterized transport system, permease component
	Chlamydiae (204428)		Uncharacterized conserved protein	A/G-specific DNA glycosylase	Oligoendopeptidase F	Pseudouridylate synthases, 23S RNA-specific
	Deinococcus-thermus (1297)		Uncharacterized conserved protein	Thymidylate kinase	Uncharacterized conserved protein	Lactoylglutathione lyase and related lyases	Glutamine cyclotransferase	UDP-N-acetylmuramyl tripeptide synthase	Rhodanese-related sulfurtransferase	Ketosteroid isomerase-related protein	Peptide methionine sulfoxide reductase	Thiamine biosynthesis enzyme ThiH and related uncharacterized enzymes	Predicted 6-phosphogluconate dehydrogenase	Serine-pyruvate aminotransferase/archaeal aspartate aminotransferase	Predicted periplasmic solute-binding protein	Predicted Zn-dependent peptidases	Glucoamylase and related glycosyl hydrolases	ABC-type dipeptide/oligopeptide/nickel transport system, ATPase component	Glucose-6-P dehydrogenase subunit	6-phosphogluconolactonase/Glucosamine-6-phosphate isomerase/deaminase	Uncharacterized Fe-S protein	Predicted transcriptional regulators	ABC-type dipeptide transport system, periplasmic component	ABC-type dipeptide/oligopeptide/nickel transport systems, permease components	Glucose-6-phosphate 1-dehydrogenase	Dehydrogenases with different specificities (related to short-chain alcohol dehydrogenases)	ABC-type oligopeptide transport system, ATPase component	DNA repair photolyase	Predicted kinase
	Firmicutes (1239)		Uncharacterized conserved protein	Predicted SAM-dependent methyltransferase	Glycine/D-amino acid oxidases (deaminating)	Di- and tripeptidases	DNA-directed RNA polymerase, sigma subunit (sigma70/sigma32)	DNA primase (bacterial type)	Putative primosome component and related proteins	dTDP-glucose pyrophosphorylase	dTDP-4-dehydrorhamnose 3,5-epimerase and related enzymes	Zn-ribbon protein, possibly nucleic acid-binding	Homoserine trans-succinylase	Uncharacterized protein conserved in bacteria	Predicted divalent heavy-metal cations transporter	Superfamily II DNA and RNA helicases	Endonuclease IV	Uncharacterized protein conserved in bacteria	dTDP-D-glucose 4,6-dehydratase	Glycyl-tRNA synthetase, beta subunit	Glycyl-tRNA synthetase, alpha subunit	Predicted EndoIII-related endonuclease	Penicillin tolerance protein	Inorganic pyrophosphatase/exopolyphosphatase	Threonyl-tRNA synthetase	ATPases with chaperone activity, ATP-binding subunit	Uridine kinase	dGTP triphosphohydrolase	Predicted RNA-binding protein homologous to eukaryotic snRNP	Ribonuclease HI	ABC-type proline/glycine betaine transport systems, permease component	Lysophospholipase L1 and related esterases	Uncharacterized conserved protein	Cytochrome c, mono- and diheme variants	Adenine/guanine phosphoribosyltransferases and related PRPP-binding proteins	ABC-type Mn2+/Zn2+ transport systems, permease components	Predicted unusual protein kinase	GTPase	Predicted membrane protein	Recombinational DNA repair protein (RecF pathway)	Predicted membrane protein	ABC-type Mn/Zn transport systems, ATPase component	ABC-type proline/glycine betaine transport systems, ATPase components	Parvulin-like peptidyl-prolyl isomerase	Periplasmic glycine betaine/choline-binding (lipo)protein of an ABC-type transport system (osmoprotectant binding protein)	Uncharacterized protein conserved in bacteria	Predicted Zn-dependent peptidases	Uncharacterized proteins of the AP superfamily	DnaJ-class molecular chaperone with C-terminal Zn finger domain
		Bacilli (91061)	Uncharacterized conserved protein	Predicted SAM-dependent methyltransferase	Glycine/D-amino acid oxidases (deaminating)	Di- and tripeptidases	dTDP-4-dehydrorhamnose 3,5-epimerase and related enzymes	dTDP-glucose pyrophosphorylase	Putative primosome component and related proteins	dTDP-D-glucose 4,6-dehydratase	Predicted EndoIII-related endonuclease	DNA-directed RNA polymerase, sigma subunit (sigma70/sigma32)	Homoserine trans-succinylase	Superfamily II DNA and RNA helicases	DNA primase (bacterial type)	Endonuclease IV	ATPases with chaperone activity, ATP-binding subunit	Uncharacterized protein conserved in bacteria	Predicted divalent heavy-metal cations transporter	Uncharacterized protein conserved in bacteria	Cytochrome c, mono- and diheme variants	Adenine/guanine phosphoribosyltransferases and related PRPP-binding proteins	Glycyl-tRNA synthetase, beta subunit	Glycyl-tRNA synthetase, alpha subunit	Inorganic pyrophosphatase/exopolyphosphatase	Lysophospholipase L1 and related esterases	ABC-type Mn/Zn transport systems, ATPase component	Aldo/keto reductases, related to diketogulonate reductase	Parvulin-like peptidyl-prolyl isomerase	Penicillin tolerance protein	NTP pyrophosphohydrolases including oxidative damage repair enzymes	ABC-type Mn2+/Zn2+ transport systems, permease components	D-mannonate dehydratase	Conserved protein/domain typically associated with flavoprotein oxygenases, DIM6/NTAB family	Predicted DNA alkylation repair enzyme	Predicted membrane protein	Fe2+/Zn2+ uptake regulation proteins	Transcriptional regulators	Dehydrogenases with different specificities (related to short-chain alcohol dehydrogenases)	Predicted hydrolases or acyltransferases (alpha/beta hydrolase superfamily)	2-succinyl-6-hydroxy-2,4-cyclohexadiene-1-carboxylate synthase	Uncharacterized conserved protein	Superfamily II DNA/RNA helicases, SNF2 family	Isochorismate synthase	Uncharacterized protein conserved in bacteria	Hydroxymethylpyrimidine/phosphomethylpyrimidine kinase	Membrane protein required for beta-lactamase induction	Uncharacterized proteins of the AP superfamily	L-alanine-DL-glutamate epimerase and related enzymes of enolase superfamily
		Clostridia (186801)	Uncharacterized conserved protein	Predicted SAM-dependent methyltransferase	Zn-ribbon protein, possibly nucleic acid-binding	DNA-directed RNA polymerase, sigma subunit (sigma70/sigma32)	DNA primase (bacterial type)	Predicted unusual protein kinase	Threonyl-tRNA synthetase	NAD-dependent DNA ligase (contains BRCT domain type II)	Uridine kinase	dGTP triphosphohydrolase	Uncharacterized conserved protein	Ribonuclease HI	Predicted RNA-binding protein homologous to eukaryotic snRNP	Multimeric flavodoxin WrbA	Valyl-tRNA synthetase	3-methyladenine DNA glycosylase	ABC-type dipeptide/oligopeptide/nickel transport systems, permease components	Collagenase and related proteases	Transcriptional regulators	ABC-type dipeptide transport system, periplasmic component	Hydrolases of the alpha/beta superfamily	ABC-type dipeptide/oligopeptide/nickel transport systems, permease components	Arylsulfatase regulator (Fe-S oxidoreductase)	Predicted hydrolases or acyltransferases (alpha/beta hydrolase superfamily)	Histone acetyltransferase HPA2 and related acetyltransferases	ABC-type dipeptide/oligopeptide/nickel transport system, ATPase component	Enterochelin esterase and related enzymes	Na+/melibiose symporter and related transporters	UDP-glucose 4-epimerase	Diadenosine tetraphosphatase and related serine/threonine protein phosphatases	Predicted membrane protein	Predicted N6-adenine-specific DNA methylase	Uncharacterized conserved protein	DNA polymerase IV (family X)	Imidazolonepropionase and related amidohydrolases	Regulator of cell morphogenesis and NO signaling	Predicted hydrolases of HD superfamily	Uncharacterized conserved protein	Predicted hydrolase (HAD superfamily)	SH3 domain protein	ATP-utilizing enzymes of the PP-loop superfamily	A/G-specific DNA glycosylase	Preprotein translocase subunit SecG
		Negativicutes (909932)	Predicted SAM-dependent methyltransferase	Uncharacterized conserved protein	Predicted HD-superfamily hydrolase	Cobyrinic acid a,c-diamide synthase	Uncharacterized conserved protein	DNA-directed RNA polymerase, sigma subunit (sigma70/sigma32)	Protein involved in propanediol utilization, and related proteins (includes coumermycin biosynthetic protein), possible kinase	Thiamine monophosphate synthase	Acetyltransferase (isoleucine patch superfamily)	Histidinol-phosphate/aromatic aminotransferase and cobyric acid decarboxylase	Fructose-2,6-bisphosphatase
	Fusobacteria (32066)		Uncharacterized conserved protein	DNA-directed RNA polymerase, sigma subunit (sigma70/sigma32)	DNA-directed RNA polymerase specialized sigma subunit	Parvulin-like peptidyl-prolyl isomerase	DNA primase (bacterial type)
	Planctomycetes (203682)		Uncharacterized conserved protein	Branched-chain amino acid aminotransferase/ 4-amino-4-deoxychorismate lyase	Leucyl aminopeptidase (aminopeptidase T)	Anthranilate/para-aminobenzoate synthases component I	FOG: FHA domain	FOG: HEAT repeat	Predicted dehydrogenases and related proteins	7,8-dihydro-6-hydroxymethylpterin-pyrophosphokinase
	Proteobacteria (1224)		Uncharacterized conserved protein	Allophanate hydrolase subunit 1	Allophanate hydrolase subunit 2	Uncharacterized proteins, homologs of lactam utilization protein B	Zn-ribbon protein, possibly nucleic acid-binding	Formamidopyrimidine-DNA glycosylase	3-deoxy-D-manno-octulosonic-acid transferase	Pseudouridylate synthases, 23S RNA-specific	Glycyl-tRNA synthetase, alpha subunit	Glycerol-3-phosphate dehydrogenase	Nitroreductase	Prolipoprotein diacylglyceryltransferase	Deoxyribodipyrimidine photolyase	Uncharacterized conserved protein	Pyrrolidone-carboxylate peptidase (N-terminal pyroglutamyl peptidase)	Uncharacterized conserved protein	Collagenase and related proteases	Predicted membrane protein	Phosphoribosylcarboxyaminoimidazole (NCAIR) mutase	Chromosome segregation ATPases	Predicted membrane protein	ABC-type transport system involved in resistance to organic solvents, ATPase component	ABC-type transport system involved in resistance to organic solvents, auxiliary component	Predicted RNA-binding protein (contains KH domain)	Predicted transcriptional regulator, BolA superfamily	SAM-dependent methyltransferases	Signal recognition particle GTPase	Ribosomal protein L19	tRNA-(guanine-N1)-methyltransferase	ABC-type transport system involved in resistance to organic solvents, permease component	UDP-N-acetylglucosamine enolpyruvyl transferase	Ribosomal protein S16	RimM protein, required for 16S rRNA processing	ABC-type transport system involved in resistance to organic solvents, periplasmic component	Predicted GTPases (dynamin-related)	Anti-anti-sigma regulatory factor (antagonist of anti-sigma factor)	Homoserine trans-succinylase	O-acetylhomoserine sulfhydrylase	Pyridoxal phosphate biosynthesis protein	Zn-dependent hydrolases, including glyoxylases	Outer membrane lipoprotein	Acyl carrier protein	Predicted membrane protein	Glutathione S-transferase	2C-methyl-D-erythritol 2,4-cyclodiphosphate synthase	Cytochrome b subunit of the bc complex	Rieske Fe-S protein
		Betaproteobacteria (28216)	Uncharacterized conserved protein	Pyridoxal phosphate biosynthesis protein	Cytochrome c1	Permeases of the major facilitator superfamily	Glutathione S-transferase	Cytochrome b subunit of the bc complex	Rieske Fe-S protein	Ribosomal protein L13	Ribosomal protein S9	Zn-dependent hydrolases, including glyoxylases	2-keto-4-pentenoate hydratase/2-oxohepta-3-ene-1,7-dioic acid hydratase (catechol pathway)	Uncharacterized protein conserved in bacteria	ATP-dependent DNA ligase	Transcriptional regulator	Stringent starvation protein B	Transposase and inactivated derivatives, IS5 family	Response regulator containing a CheY-like receiver domain and an HTH DNA-binding domain	Ribosome-associated heat shock protein implicated in the recycling of the 50S subunit (S4 paralog)	Phosphoenolpyruvate-protein kinase (PTS system EI component in bacteria)	Hypoxanthine-guanine phosphoribosyltransferase	Uncharacterized protein conserved in bacteria	Nicotinate-nucleotide pyrophosphorylase	Cell shape-determining protein	Phosphoenolpyruvate carboxylase	Phosphotransferase system, mannose/fructose-specific component IIA	Phosphotransferase system, HPr-related proteins	Glycerol-3-phosphate dehydrogenase	Membrane-bound lytic murein transglycosylase
		Deltaproteobacteria (28221)	Uncharacterized conserved protein	Zn-ribbon protein, possibly nucleic acid-binding	2C-methyl-D-erythritol 2,4-cyclodiphosphate synthase	4-diphosphocytidyl-2-methyl-D-erithritol synthase	Ribonuclease HI	Glutamyl- and glutaminyl-tRNA synthetases	FOG: TPR repeat	Cysteinyl-tRNA synthetase
		Epsilonproteobacteria (29547)	Uncharacterized conserved protein	Zn-ribbon protein, possibly nucleic acid-binding	3-deoxy-D-manno-octulosonic-acid transferase	Glycyl-tRNA synthetase, alpha subunit	Pseudouridylate synthases, 23S RNA-specific	Prolipoprotein diacylglyceryltransferase	Glycerol-3-phosphate dehydrogenase	Nitroreductase	Collagenase and related proteases	Phosphoribosylcarboxyaminoimidazole (NCAIR) mutase	Chromosome segregation ATPases	Signal recognition particle GTPase	Ribosomal protein S16	Predicted RNA-binding protein (contains KH domain)	Ribosomal protein L19	tRNA-(guanine-N1)-methyltransferase	RimM protein, required for 16S rRNA processing	Predicted GTPases (dynamin-related)	Glutaredoxin and related proteins	Homoserine trans-succinylase	FOG: TPR repeat	O-acetylhomoserine sulfhydrylase	Uncharacterized conserved protein	Superfamily I DNA and RNA helicases	Acyl carrier protein	Uncharacterized conserved protein	Membrane proteins related to metalloendopeptidases	Pseudouridine synthase	Uncharacterized protein conserved in bacteria	Carbon storage regulator (could also regulate swarming and quorum sensing)	4-diphosphocytidyl-2C-methyl-D-erythritol 2-phosphate synthase	tmRNA-binding protein	3-deoxy-D-arabino-heptulosonate 7-phosphate (DAHP) synthase	Outer membrane protein	Uncharacterized conserved protein	Uncharacterized homolog of plant Iojap protein	Putative silver efflux pump	Nicotinic acid mononucleotide adenylyltransferase	FOG: Ankyrin repeat	Predicted transcriptional regulators containing the CopG/Arc/MetJ DNA-binding domain and a metal-binding domain	Arsenate reductase and related proteins, glutaredoxin family	Uncharacterized protein conserved in bacteria	Protein predicted to be involved in meiotic recombination	tRNA delta(2)-isopentenylpyrophosphate transferase	Uncharacterized conserved protein, contains double-stranded beta-helix domain	Membrane-fusion protein	Flagellar basal-body P-ring protein
		Gammaproteobacteria (1236)	Uncharacterized conserved protein	Allophanate hydrolase subunit 1	Allophanate hydrolase subunit 2	Uncharacterized proteins, homologs of lactam utilization protein B	Formamidopyrimidine-DNA glycosylase	Deoxyribodipyrimidine photolyase	Uncharacterized conserved protein	Pyrrolidone-carboxylate peptidase (N-terminal pyroglutamyl peptidase)	Uncharacterized conserved protein	Predicted membrane protein	Predicted membrane protein	SAM-dependent methyltransferases	Low-affinity cAMP phosphodiesterase	ABC-type transport system involved in resistance to organic solvents, permease component	UDP-N-acetylglucosamine enolpyruvyl transferase	ABC-type transport system involved in resistance to organic solvents, auxiliary component	ABC-type transport system involved in resistance to organic solvents, periplasmic component	ABC-type transport system involved in resistance to organic solvents, ATPase component	Uncharacterized conserved protein	Predicted transcriptional regulator, BolA superfamily	Outer membrane lipoprotein	Predicted NTP binding protein (contains STAS domain)	Response regulators consisting of a CheY-like receiver domain and a winged-helix DNA-binding domain	Osmosensitive K+ channel histidine kinase	K+-transporting ATPase, c chain	Predicted NAD/FAD-dependent oxidoreductase	Phosphoglucomutase	Integrase	Dipeptide/tripeptide permease	Membrane protease subunits, stomatin/prohibitin homologs	Predicted glycosyltransferases	High-affinity K+ transport system, ATPase chain B	ATP phosphoribosyltransferase	K+-transporting ATPase, A chain	Predicted hydrolase (HAD superfamily)	Arginine/lysine/ornithine decarboxylases	Sphingosine kinase and enzymes related to eukaryotic diacylglycerol kinase	Signal transduction histidine kinase	Superfamily I DNA and RNA helicases	Anti-anti-sigma regulatory factor (antagonist of anti-sigma factor)	Histidinol-phosphate/aromatic aminotransferase and cobyric acid decarboxylase	tRNA nucleotidyltransferase/poly(A) polymerase	ABC-type polysaccharide/polyol phosphate export systems, permease component	Stress-induced morphogen (activity unknown)	3-hydroxyisobutyrate dehydrogenase and related beta-hydroxyacid dehydrogenases	SH3 domain protein	Uncharacterized membrane protein, putative virulence factor
	Spirochaetes (203691)		Uncharacterized conserved protein	Lipoprotein signal peptidase	ABC-type (unclassified) transport system, ATPase component	Uncharacterized conserved protein	Uncharacterized protein conserved in bacteria	Organic solvent tolerance protein OstA	Uncharacterized protein conserved in bacteria	UDP-N-acetylglucosamine enolpyruvyl transferase	Uncharacterized conserved protein	Predicted integral membrane protein	Glycosyltransferase	N-acetylglucosamine-6-phosphate deacetylase	Methyl-accepting chemotaxis protein	Uncharacterized flavoproteins
	Tenericutes (544448)		Uncharacterized conserved protein	DNA-directed RNA polymerase, sigma subunit (sigma70/sigma32)	DNA primase (bacterial type)	Glycyl-tRNA synthetase (class II)	Predicted SAM-dependent methyltransferase	Recombinational DNA repair protein (RecF pathway)	Predicted metal-dependent hydrolase	GTPase	ABC-type bacteriocin/lantibiotic exporters, contain an N-terminal double-glycine peptidase domain	Predicted membrane protein	Thioredoxin-like proteins and domains	Endonuclease IV	Superfamily II DNA and RNA helicases	Uncharacterized conserved protein	Signal recognition particle GTPase	Tyrosyl-tRNA synthetase	Translation elongation factor Ts	Ribosomal protein S2	Predicted transcriptional regulator containing the HTH domain	FKBP-type peptidyl-prolyl cis-trans isomerase (trigger factor)	ATP-dependent Lon protease, bacterial type	Uncharacterized conserved protein	ABC-type multidrug transport system, ATPase and permease components	Predicted hydrolases or acyltransferases (alpha/beta hydrolase superfamily)	Uncharacterized protein conserved in bacteria	Peptide methionine sulfoxide reductase	Cell division GTPase	Superfamily I DNA and RNA helicases and helicase subunits	Inorganic pyrophosphatase	Putative intracellular protease/amidase
	Thermodesulfobacteria (200940) / Thermotogae (200918)		Uncharacterized conserved protein	Zn-ribbon protein, possibly nucleic acid-binding	Pyruvate:ferredoxin oxidoreductase and related 2-oxoacid:ferredoxin oxidoreductases, delta subunit	Pyruvate:ferredoxin oxidoreductase and related 2-oxoacid:ferredoxin oxidoreductases, gamma subunit	Pyruvate:ferredoxin oxidoreductase and related 2-oxoacid:ferredoxin oxidoreductases, beta subunit	Molybdopterin-guanine dinucleotide biosynthesis protein	HD-GYP domain	Predicted PP-loop superfamily ATPase	FOG: LysM repeat	Predicted Zn-dependent hydrolases of the beta-lactamase fold	Putative translation factor (SUA5)	Fe2+/Zn2+ uptake regulation proteins	Predicted Fe-S-cluster oxidoreductase	Pyruvate:ferredoxin oxidoreductase and related 2-oxoacid:ferredoxin oxidoreductases, alpha subunit
Archaea (2157)			Uncharacterized conserved protein	Methylase of polypeptide chain release factors	Uncharacterized metal-binding protein	Uncharacterized protein conserved in archaea	Predicted RNA-binding protein (contains PUA domain)	Biotin synthase and related enzymes	Uncharacterized protein conserved in archaea	Uncharacterized protein conserved in archaea	Predicted dinucleotide-utilizing enzyme of the ThiF/HesA family	Alanyl-tRNA synthetase	Predicted transcriptional regulators	Uncharacterized conserved protein	Uncharacterized protein conserved in archaea	Methionine aminopeptidase	Predicted ATPase (AAA+ superfamily)	H2-forming N5,N10-methylenetetrahydromethanopterin dehydrogenase	Arginase/agmatinase/formimionoglutamate hydrolase, arginase family	Deoxyhypusine synthase	Translation elongation factor P (EF-P)/translation initiation factor 5A (eIF-5A)	Predicted integral membrane protein	Membrane-associated phospholipid phosphatase	Multimeric flavodoxin WrbA	Predicted RNA-binding protein, contains TRAM domain	SAM-dependent methyltransferases	Glutamate decarboxylase and related PLP-dependent proteins	Methyl coenzyme M reductase, subunit D	Methyl coenzyme M reductase, beta subunit	ABC-type transport system involved in Fe-S cluster assembly, permease component	Predicted glutamine amidotransferase involved in pyridoxine biosynthesis	ABC-type phosphate transport system, ATPase component	Tetrahydromethanopterin S-methyltransferase, subunit F	Methyl coenzyme M reductase, gamma subunit	Universal stress protein UspA and related nucleotide-binding proteins	Methyl coenzyme M reductase, subunit C	Cytidylyltransferase	Tetrahydromethanopterin S-methyltransferase, subunit E	Methyl coenzyme M reductase, alpha subunit	Uncharacterized conserved protein	ABC-type phosphate transport system, permease component	Large-conductance mechanosensitive channel	Nitrogenase subunit NifH (ATPase)	Queuine/archaeosine tRNA-ribosyltransferase	Molybdenum cofactor biosynthesis enzyme	Predicted phosphoesterase	Predicted permease	Tetrahydromethanopterin S-methyltransferase, subunit H	ABC-type amino acid transport/signal transduction systems, periplasmic component/domain
	Crenarchaeota (28889)		Uncharacterized conserved protein
	Euryarchaeota (28890)		Uncharacterized conserved protein	Methylase of polypeptide chain release factors	Uncharacterized metal-binding protein	Uncharacterized protein conserved in archaea	Predicted RNA-binding protein (contains PUA domain)	Biotin synthase and related enzymes	Uncharacterized protein conserved in archaea	Uncharacterized protein conserved in archaea	Predicted dinucleotide-utilizing enzyme of the ThiF/HesA family	Alanyl-tRNA synthetase	Predicted transcriptional regulators	Uncharacterized conserved protein	Uncharacterized protein conserved in archaea	Methionine aminopeptidase	Predicted ATPase (AAA+ superfamily)	H2-forming N5,N10-methylenetetrahydromethanopterin dehydrogenase	Arginase/agmatinase/formimionoglutamate hydrolase, arginase family	Deoxyhypusine synthase	Translation elongation factor P (EF-P)/translation initiation factor 5A (eIF-5A)	Predicted integral membrane protein	Membrane-associated phospholipid phosphatase	Multimeric flavodoxin WrbA	Predicted RNA-binding protein, contains TRAM domain	SAM-dependent methyltransferases	Glutamate decarboxylase and related PLP-dependent proteins	Methyl coenzyme M reductase, subunit D	Methyl coenzyme M reductase, beta subunit	ABC-type transport system involved in Fe-S cluster assembly, permease component	Predicted glutamine amidotransferase involved in pyridoxine biosynthesis	ABC-type phosphate transport system, ATPase component	Tetrahydromethanopterin S-methyltransferase, subunit F	Methyl coenzyme M reductase, gamma subunit	Universal stress protein UspA and related nucleotide-binding proteins	Methyl coenzyme M reductase, subunit C	Cytidylyltransferase	Tetrahydromethanopterin S-methyltransferase, subunit E	Methyl coenzyme M reductase, alpha subunit	Uncharacterized conserved protein	ABC-type phosphate transport system, permease component	Large-conductance mechanosensitive channel	Nitrogenase subunit NifH (ATPase)	Queuine/archaeosine tRNA-ribosyltransferase	Molybdenum cofactor biosynthesis enzyme	Predicted phosphoesterase	Predicted permease	Tetrahydromethanopterin S-methyltransferase, subunit H	ABC-type amino acid transport/signal transduction systems, periplasmic component/domain
	Thaumarchaeota (651137)		Uncharacterized conserved protein
[truncated: 104 more columns]

## Sheet: b.1
https://seoscout.com/tools/keyword-analyzer	COG0327 - COGs only	For sorting values
Raw Data
comma separated export	Keyword	Words	Uses	Uses (%)
cog0327,1,23,2.4	cog0327	1	23	2.4
cog1579,1,9,0.9	cog1579	1	9	0.9
cog0568,1,7,0.7	cog0568	1	7	0.7
cog0358,1,6,0.6	cog0358	1	6	0.6
cog0457,1,6,0.6	cog0457	1	6	0.6
cog2384,1,6,0.6	cog2384	1	6	0.6
cog0079,1,5,0.5	cog0079	1	5	0.5
cog0240,1,5,0.5	cog0240	1	5	0.5
cog0328,1,5,0.5	cog0328	1	5	0.5
cog0500,1,5,0.5	cog0500	1	5	0.5
cog0513,1,5,0.5	cog0513	1	5	0.5
cog0596,1,5,0.5	cog0596	1	5	0.5
cog0655,1,5,0.5	cog0655	1	5	0.5
cog0752,1,5,0.5	cog0752	1	5	0.5
cog0826,1,5,0.5	cog0826	1	5	0.5
cog1028,1,5,0.5	cog1028	1	5	0.5
cog1897,1,5,0.5	cog1897	1	5	0.5
cog0177,1,4,0.4	cog0177	1	4	0.4
cog0477,1,4,0.4	cog0477	1	4	0.4
cog0494,1,4,0.4	cog0494	1	4	0.4
cog0531,1,4,0.4	cog0531	1	4	0.4
cog0541,1,4,0.4	cog0541	1	4	0.4
cog0564,1,4,0.4	cog0564	1	4	0.4
cog0639,1,4,0.4	cog0639	1	4	0.4
cog0648,1,4,0.4	cog0648	1	4	0.4
cog0735,1,4,0.4	cog0735	1	4	0.4
cog0751,1,4,0.4	cog0751	1	4	0.4
cog0760,1,4,0.4	cog0760	1	4	0.4
cog0766,1,4,0.4	cog0766	1	4	0.4
cog1131,1,4,0.4	cog1131	1	4	0.4
cog1194,1,4,0.4	cog1194	1	4	0.4
cog1196,1,4,0.4	cog1196	1	4	0.4
cog1671,1,4,0.4	cog1671	1	4	0.4
cog1802,1,4,0.4	cog1802	1	4	0.4
cog0040,1,3,0.3	cog0040	1	3	0.3
cog0041,1,3,0.3	cog0041	1	3	0.3
cog0141,1,3,0.3	cog0141	1	3	0.3
cog0147,1,3,0.3	cog0147	1	3	0.3
cog0210,1,3,0.3	cog0210	1	3	0.3
cog0225,1,3,0.3	cog0225	1	3	0.3
cog0228,1,3,0.3	cog0228	1	3	0.3
cog0232,1,3,0.3	cog0232	1	3	0.3
cog0266,1,3,0.3	cog0266	1	3	0.3
cog0271,1,3,0.3	cog0271	1	3	0.3
cog0335,1,3,0.3	cog0335	1	3	0.3
cog0336,1,3,0.3	cog0336	1	3	0.3
cog0351,1,3,0.3	cog0351	1	3	0.3
cog0406,1,3,0.3	cog0406	1	3	0.3
cog0415,1,3,0.3	cog0415	1	3	0.3
cog0428,1,3,0.3	cog0428	1	3	0.3
cog0503,1,3,0.3	cog0503	1	3	0.3
cog0525,1,3,0.3	cog0525	1	3	0.3
cog0601,1,3,0.3	cog0601	1	3	0.3
cog0607,1,3,0.3	cog0607	1	3	0.3
cog0628,1,3,0.3	cog0628	1	3	0.3
cog0665,1,3,0.3	cog0665	1	3	0.3
cog0682,1,3,0.3	cog0682	1	3	0.3
cog0695,1,3,0.3	cog0695	1	3	0.3
cog0699,1,3,0.3	cog0699	1	3	0.3
cog0747,1,3,0.3	cog0747	1	3	0.3
cog0761,1,3,0.3	cog0761	1	3	0.3
cog0767,1,3,0.3	cog0767	1	3	0.3
cog0778,1,3,0.3	cog0778	1	3	0.3
cog0806,1,3,0.3	cog0806	1	3	0.3
cog0842,1,3,0.3	cog0842	1	3	0.3
cog1087,1,3,0.3	cog1087	1	3	0.3
cog1088,1,3,0.3	cog1088	1	3	0.3
cog1108,1,3,0.3	cog1108	1	3	0.3
cog1121,1,3,0.3	cog1121	1	3	0.3
cog1124,1,3,0.3	cog1124	1	3	0.3
cog1127,1,3,0.3	cog1127	1	3	0.3
cog1209,1,3,0.3	cog1209	1	3	0.3
cog1227,1,3,0.3	cog1227	1	3	0.3
cog1284,1,3,0.3	cog1284	1	3	0.3
cog1463,1,3,0.3	cog1463	1	3	0.3
cog1519,1,3,0.3	cog1519	1	3	0.3
cog1540,1,3,0.3	cog1540	1	3	0.3
cog1683,1,3,0.3	cog1683	1	3	0.3
cog1692,1,3,0.3	cog1692	1	3	0.3
cog1806,1,3,0.3	cog1806	1	3	0.3
cog1837,1,3,0.3	cog1837	1	3	0.3
cog1898,1,3,0.3	cog1898	1	3	0.3
cog1984,1,3,0.3	cog1984	1	3	0.3
cog1995,1,3,0.3	cog1995	1	3	0.3
cog2010,1,3,0.3	cog2010	1	3	0.3
cog2039,1,3,0.3	cog2039	1	3	0.3
cog2049,1,3,0.3	cog2049	1	3	0.3
cog2195,1,3,0.3	cog2195	1	3	0.3
cog2854,1,3,0.3	cog2854	1	3	0.3
cog3103,1,3,0.3	cog3103	1	3	0.3
cog3113,1,3,0.3	cog3113	1	3	0.3
cog3133,1,3,0.3	cog3133	1	3	0.3
cog3272,1,3,0.3	cog3272	1	3	0.3
cog3817,1,3,0.3	cog3817	1	3	0.3
cog3819,1,3,0.3	cog3819	1	3	0.3
cog3935,1,3,0.3	cog3935	1	3	0.3
cog0008,1,2,0.2	cog0008	1	2	0.2
cog0009,1,2,0.2	cog0009	1	2	0.2
cog0010,1,2,0.2	cog0010	1	2	0.2
cog0013,1,2,0.2	cog0013	1	2	0.2
cog0024,1,2,0.2	cog0024	1	2	0.2
cog0052,1,2,0.2	cog0052	1	2	0.2
cog0076,1,2,0.2	cog0076	1	2	0.2
cog0102,1,2,0.2	cog0102	1	2	0.2
cog0103,1,2,0.2	cog0103	1	2	0.2
cog0110,1,2,0.2	cog0110	1	2	0.2
cog0115,1,2,0.2	cog0115	1	2	0.2
cog0116,1,2,0.2	cog0116	1	2	0.2
cog0125,1,2,0.2	cog0125	1	2	0.2
cog0215,1,2,0.2	cog0215	1	2	0.2
cog0217,1,2,0.2	cog0217	1	2	0.2
cog0221,1,2,0.2	cog0221	1	2	0.2
cog0226,1,2,0.2	cog0226	1	2	0.2
cog0231,1,2,0.2	cog0231	1	2	0.2
cog0236,1,2,0.2	cog0236	1	2	0.2
cog0245,1,2,0.2	cog0245	1	2	0.2
cog0258,1,2,0.2	cog0258	1	2	0.2
cog0264,1,2,0.2	cog0264	1	2	0.2
cog0272,1,2,0.2	cog0272	1	2	0.2
cog0311,1,2,0.2	cog0311	1	2	0.2
cog0319,1,2,0.2	cog0319	1	2	0.2
cog0343,1,2,0.2	cog0343	1	2	0.2
cog0344,1,2,0.2	cog0344	1	2	0.2
cog0346,1,2,0.2	cog0346	1	2	0.2
cog0352,1,2,0.2	cog0352	1	2	0.2
cog0388,1,2,0.2	cog0388	1	2	0.2
cog0396,1,2,0.2	cog0396	1	2	0.2
cog0423,1,2,0.2	cog0423	1	2	0.2
cog0438,1,2,0.2	cog0438	1	2	0.2
cog0441,1,2,0.2	cog0441	1	2	0.2
cog0452,1,2,0.2	cog0452	1	2	0.2
cog0454,1,2,0.2	cog0454	1	2	0.2
cog0461,1,2,0.2	cog0461	1	2	0.2
cog0463,1,2,0.2	cog0463	1	2	0.2
cog0466,1,2,0.2	cog0466	1	2	0.2
cog0481,1,2,0.2	cog0481	1	2	0.2
cog0491,1,2,0.2	cog0491	1	2	0.2
cog0502,1,2,0.2	cog0502	1	2	0.2
cog0542,1,2,0.2	cog0542	1	2	0.2
cog0544,1,2,0.2	cog0544	1	2	0.2
cog0553,1,2,0.2	cog0553	1	2	0.2
cog0572,1,2,0.2	cog0572	1	2	0.2
cog0573,1,2,0.2	cog0573	1	2	0.2
cog0581,1,2,0.2	cog0581	1	2	0.2
cog0582,1,2,0.2	cog0582	1	2	0.2
cog0583,1,2,0.2	cog0583	1	2	0.2
cog0589,1,2,0.2	cog0589	1	2	0.2
cog0597,1,2,0.2	cog0597	1	2	0.2
cog0603,1,2,0.2	cog0603	1	2	0.2
cog0605,1,2,0.2	cog0605	1	2	0.2
cog0612,1,2,0.2	cog0612	1	2	0.2
cog0615,1,2,0.2	cog0615	1	2	0.2
cog0615,1,2,0.2	cog0615	1	2	0.2
cog0622,1,2,0.2	cog0622	1	2	0.2
cog0625,1,2,0.2	cog0625	1	2	0.2
cog0626,1,2,0.2	cog0626	1	2	0.2
cog0634,1,2,0.2	cog0634	1	2	0.2
cog0640,1,2,0.2	cog0640	1	2	0.2
cog0661,1,2,0.2	cog0661	1	2	0.2
cog0671,1,2,0.2	cog0671	1	2	0.2
cog0674,1,2,0.2	cog0674	1	2	0.2
cog0697,1,2,0.2	cog0697	1	2	0.2
cog0704,1,2,0.2	cog0704	1	2	0.2
cog0719,1,2,0.2	cog0719	1	2	0.2
cog0720,1,2,0.2	cog0720	1	2	0.2
cog0723,1,2,0.2	cog0723	1	2	0.2
cog0727,1,2,0.2	cog0727	1	2	0.2
cog0739,1,2,0.2	cog0739	1	2	0.2
cog0745,1,2,0.2	cog0745	1	2	0.2
cog0749,1,2,0.2	cog0749	1	2	0.2
cog0789,1,2,0.2	cog0789	1	2	0.2
cog0793,1,2,0.2	cog0793	1	2	0.2
cog0801,1,2,0.2	cog0801	1	2	0.2
cog0834,1,2,0.2	cog0834	1	2	0.2
cog1011,1,2,0.2	cog1011	1	2	0.2
cog1013,1,2,0.2	cog1013	1	2	0.2
cog1014,1,2,0.2	cog1014	1	2	0.2
cog1073,1,2,0.2	cog1073	1	2	0.2
cog1080,1,2,0.2	cog1080	1	2	0.2
cog1117,1,2,0.2	cog1117	1	2	0.2
cog1132,1,2,0.2	cog1132	1	2	0.2
cog1137,1,2,0.2	cog1137	1	2	0.2
cog1144,1,2,0.2	cog1144	1	2	0.2
cog1159,1,2,0.2	cog1159	1	2	0.2
cog1165,1,2,0.2	cog1165	1	2	0.2
cog1169,1,2,0.2	cog1169	1	2	0.2
cog1173,1,2,0.2	cog1173	1	2	0.2
cog1211,1,2,0.2	cog1211	1	2	0.2
cog1225,1,2,0.2	cog1225	1	2	0.2
cog1228,1,2,0.2	cog1228	1	2	0.2
cog1290,1,2,0.2	cog1290	1	2	0.2
cog1293,1,2,0.2	cog1293	1	2	0.2
cog1306,1,2,0.2	cog1306	1	2	0.2
cog1312,1,2,0.2	cog1312	1	2	0.2
cog1322,1,2,0.2	cog1322	1	2	0.2
cog1348,1,2,0.2	cog1348	1	2	0.2
cog1354,1,2,0.2	cog1354	1	2	0.2
cog1366,1,2,0.2	cog1366	1	2	0.2
cog1381,1,2,0.2	cog1381	1	2	0.2
cog1386,1,2,0.2	cog1386	1	2	0.2
cog1387,1,2,0.2	cog1387	1	2	0.2
cog1423,1,2,0.2	cog1423	1	2	0.2
cog1426,1,2,0.2	cog1426	1	2	0.2
cog1430,1,2,0.2	cog1430	1	2	0.2
cog1432,1,2,0.2	cog1432	1	2	0.2
cog1434,1,2,0.2	cog1434	1	2	0.2
cog1496,1,2,0.2	cog1496	1	2	0.2
cog1509,1,2,0.2	cog1509	1	2	0.2
cog1523,1,2,0.2	cog1523	1	2	0.2
cog1524,1,2,0.2	cog1524	1	2	0.2
cog1606,1,2,0.2	cog1606	1	2	0.2
cog1672,1,2,0.2	cog1672	1	2	0.2
cog1697,1,2,0.2	cog1697	1	2	0.2
cog1763,1,2,0.2	cog1763	1	2	0.2
cog1793,1,2,0.2	cog1793	1	2	0.2
cog1796,1,2,0.2	cog1796	1	2	0.2
cog1833,1,2,0.2	cog1833	1	2	0.2
cog1853,1,2,0.2	cog1853	1	2	0.2
cog1873,1,2,0.2	cog1873	1	2	0.2
cog1896,1,2,0.2	cog1896	1	2	0.2
cog1899,1,2,0.2	cog1899	1	2	0.2
cog1925,1,2,0.2	cog1925	1	2	0.2
cog1934,1,2,0.2	cog1934	1	2	0.2
cog1962,1,2,0.2	cog1962	1	2	0.2
cog1970,1,2,0.2	cog1970	1	2	0.2
cog1982,1,2,0.2	cog1982	1	2	0.2
cog2016,1,2,0.2	cog2016	1	2	0.2
cog2060,1,2,0.2	cog2060	1	2	0.2
cog2094,1,2,0.2	cog2094	1	2	0.2
cog2156,1,2,0.2	cog2156	1	2	0.2
cog2197,1,2,0.2	cog2197	1	2	0.2
cog2205,1,2,0.2	cog2205	1	2	0.2
cog2211,1,2,0.2	cog2211	1	2	0.2
cog2216,1,2,0.2	cog2216	1	2	0.2
cog2220,1,2,0.2	cog2220	1	2	0.2
cog2266,1,2,0.2	cog2266	1	2	0.2
cog2270,1,2,0.2	cog2270	1	2	0.2
cog2314,1,2,0.2	cog2314	1	2	0.2
cog2755,1,2,0.2	cog2755	1	2	0.2
cog2857,1,2,0.2	cog2857	1	2	0.2
cog2873,1,2,0.2	cog2873	1	2	0.2
cog2890,1,2,0.2	cog2890	1	2	0.2
cog2893,1,2,0.2	cog2893	1	2	0.2
cog2896,1,2,0.2	cog2896	1	2	0.2
cog2957,1,2,0.2	cog2957	1	2	0.2
cog2966,1,2,0.2	cog2966	1	2	0.2
cog2969,1,2,0.2	cog2969	1	2	0.2
cog3104,1,2,0.2	cog3104	1	2	0.2
cog3326,1,2,0.2	cog3326	1	2	0.2
cog3467,1,2,0.2	cog3467	1	2	0.2
cog3481,1,2,0.2	cog3481	1	2	0.2
cog3744,1,2,0.2	cog3744	1	2	0.2
cog3937,1,2,0.2	cog3937	1	2	0.2
cog4015,1,2,0.2	cog4015	1	2	0.2
cog4016,1,2,0.2	cog4016	1	2	0.2
cog4017,1,2,0.2	cog4017	1	2	0.2
cog4018,1,2,0.2	cog4018	1	2	0.2
cog4019,1,2,0.2	cog4019	1	2	0.2
cog4054,1,2,0.2	cog4054	1	2	0.2
cog4055,1,2,0.2	cog4055	1	2	0.2
cog4056,1,2,0.2	cog4056	1	2	0.2
cog4057,1,2,0.2	cog4057	1	2	0.2
cog4058,1,2,0.2	cog4058	1	2	0.2
cog4059,1,2,0.2	cog4059	1	2	0.2
cog4060,1,2,0.2	cog4060	1	2	0.2
cog4061,1,2,0.2	cog4061	1	2	0.2
cog4062,1,2,0.2	cog4062	1	2	0.2
cog4063,1,2,0.2	cog4063	1	2	0.2
cog4064,1,2,0.2	cog4064	1	2	0.2
cog4065,1,2,0.2	cog4065	1	2	0.2
cog4074,1,2,0.2	cog4074	1	2	0.2
cog4085,1,2,0.2	cog4085	1	2	0.2
cog4118,1,2,0.2	cog4118	1	2	0.2
cog4218,1,2,0.2	cog4218	1	2	0.2
cog4347,1,2,0.2	cog4347	1	2	0.2
cog4508,1,2,0.2	cog4508	1	2	0.2
cog4720,1,2,0.2	cog4720	1	2	0.2
cog4912,1,2,0.2	cog4912	1	2	0.2
cog4948,1,2,0.2	cog4948	1	2	0.2
cog5007,1,2,0.2	cog5007	1	2	0.2
cog5124,1,2,0.2	cog5124	1	2	0.2
cog5212,1,2,0.2	cog5212	1	2	0.2
cog5431,1,2,0.2	cog5431	1	2	0.2
cog5542,1,2,0.2	cog5542	1	2	0.2
cog0016,1,1,0.1	cog0016	1	1	0.1
cog0033,1,1,0.1	cog0033	1	1	0.1
cog0036,1,1,0.1	cog0036	1	1	0.1
cog0037,1,1,0.1	cog0037	1	1	0.1
cog0075,1,1,0.1	cog0075	1	1	0.1
cog0130,1,1,0.1	cog0130	1	1	0.1
cog0136,1,1,0.1	cog0136	1	1	0.1
cog0145,1,1,0.1	cog0145	1	1	0.1
cog0146,1,1,0.1	cog0146	1	1	0.1
cog0152,1,1,0.1	cog0152	1	1	0.1
cog0157,1,1,0.1	cog0157	1	1	0.1
cog0162,1,1,0.1	cog0162	1	1	0.1
cog0173,1,1,0.1	cog0173	1	1	0.1
cog0178,1,1,0.1	cog0178	1	1	0.1
cog0179,1,1,0.1	cog0179	1	1	0.1
cog0183,1,1,0.1	cog0183	1	1	0.1
cog0205,1,1,0.1	cog0205	1	1	0.1
cog0206,1,1,0.1	cog0206	1	1	0.1
cog0249,1,1,0.1	cog0249	1	1	0.1
cog0268,1,1,0.1	cog0268	1	1	0.1
cog0295,1,1,0.1	cog0295	1	1	0.1
cog0323,1,1,0.1	cog0323	1	1	0.1
cog0324,1,1,0.1	cog0324	1	1	0.1
cog0329,1,1,0.1	cog0329	1	1	0.1
cog0330,1,1,0.1	cog0330	1	1	0.1
cog0363,1,1,0.1	cog0363	1	1	0.1
cog0364,1,1,0.1	cog0364	1	1	0.1
cog0390,1,1,0.1	cog0390	1	1	0.1
cog0392,1,1,0.1	cog0392	1	1	0.1
cog0395,1,1,0.1	cog0395	1	1	0.1
cog0426,1,1,0.1	cog0426	1	1	0.1
cog0436,1,1,0.1	cog0436	1	1	0.1
cog0443,1,1,0.1	cog0443	1	1	0.1
cog0444,1,1,0.1	cog0444	1	1	0.1
cog0451,1,1,0.1	cog0451	1	1	0.1
cog0468,1,1,0.1	cog0468	1	1	0.1
cog0484,1,1,0.1	cog0484	1	1	0.1
cog0488,1,1,0.1	cog0488	1	1	0.1
cog0515,1,1,0.1	cog0515	1	1	0.1
cog0517,1,1,0.1	cog0517	1	1	0.1
cog0520,1,1,0.1	cog0520	1	1	0.1
cog0526,1,1,0.1	cog0526	1	1	0.1
cog0527,1,1,0.1	cog0527	1	1	0.1
cog0539,1,1,0.1	cog0539	1	1	0.1
cog0548,1,1,0.1	cog0548	1	1	0.1
cog0557,1,1,0.1	cog0557	1	1	0.1
cog0558,1,1,0.1	cog0558	1	1	0.1
cog0562,1,1,0.1	cog0562	1	1	0.1
cog0563,1,1,0.1	cog0563	1	1	0.1
cog0576,1,1,0.1	cog0576	1	1	0.1
cog0577,1,1,0.1	cog0577	1	1	0.1
cog0591,1,1,0.1	cog0591	1	1	0.1
cog0595,1,1,0.1	cog0595	1	1	0.1
cog0617,1,1,0.1	cog0617	1	1	0.1
cog0620,1,1,0.1	cog0620	1	1	0.1
cog0635,1,1,0.1	cog0635	1	1	0.1
cog0641,1,1,0.1	cog0641	1	1	0.1
cog0645,1,1,0.1	cog0645	1	1	0.1
cog0647,1,1,0.1	cog0647	1	1	0.1
cog0656,1,1,0.1	cog0656	1	1	0.1
cog0658,1,1,0.1	cog0658	1	1	0.1
cog0666,1,1,0.1	cog0666	1	1	0.1
cog0673,1,1,0.1	cog0673	1	1	0.1
cog0685,1,1,0.1	cog0685	1	1	0.1
cog0691,1,1,0.1	cog0691	1	1	0.1
cog0693,1,1,0.1	cog0693	1	1	0.1
cog0694,1,1,0.1	cog0694	1	1	0.1
cog0728,1,1,0.1	cog0728	1	1	0.1
cog0729,1,1,0.1	cog0729	1	1	0.1
cog0730,1,1,0.1	cog0730	1	1	0.1
cog0756,1,1,0.1	cog0756	1	1	0.1
cog0768,1,1,0.1	cog0768	1	1	0.1
cog0769,1,1,0.1	cog0769	1	1	0.1
cog0799,1,1,0.1	cog0799	1	1	0.1
cog0812,1,1,0.1	cog0812	1	1	0.1
cog0818,1,1,0.1	cog0818	1	1	0.1
cog0821,1,1,0.1	cog0821	1	1	0.1
cog0822,1,1,0.1	cog0822	1	1	0.1
cog0828,1,1,0.1	cog0828	1	1	0.1
cog0840,1,1,0.1	cog0840	1	1	0.1
cog0845,1,1,0.1	cog0845	1	1	0.1
cog0864,1,1,0.1	cog0864	1	1	0.1
cog1023,1,1,0.1	cog1023	1	1	0.1
cog1051,1,1,0.1	cog1051	1	1	0.1
cog1052,1,1,0.1	cog1052	1	1	0.1
cog1057,1,1,0.1	cog1057	1	1	0.1
cog1058,1,1,0.1	cog1058	1	1	0.1
cog1060,1,1,0.1	cog1060	1	1	0.1
cog1063,1,1,0.1	cog1063	1	1	0.1
cog1079,1,1,0.1	cog1079	1	1	0.1
cog1104,1,1,0.1	cog1104	1	1	0.1
cog1109,1,1,0.1	cog1109	1	1	0.1
cog1112,1,1,0.1	cog1112	1	1	0.1
cog1125,1,1,0.1	cog1125	1	1	0.1
cog1134,1,1,0.1	cog1134	1	1	0.1
cog1136,1,1,0.1	cog1136	1	1	0.1
cog1141,1,1,0.1	cog1141	1	1	0.1
cog1160,1,1,0.1	cog1160	1	1	0.1
cog1164,1,1,0.1	cog1164	1	1	0.1
cog1174,1,1,0.1	cog1174	1	1	0.1
cog1175,1,1,0.1	cog1175	1	1	0.1
cog1180,1,1,0.1	cog1180	1	1	0.1
cog1188,1,1,0.1	cog1188	1	1	0.1
cog1191,1,1,0.1	cog1191	1	1	0.1
cog1192,1,1,0.1	cog1192	1	1	0.1
cog1216,1,1,0.1	cog1216	1	1	0.1
cog1247,1,1,0.1	cog1247	1	1	0.1
cog1249,1,1,0.1	cog1249	1	1	0.1
cog1295,1,1,0.1	cog1295	1	1	0.1
cog1296,1,1,0.1	cog1296	1	1	0.1
cog1309,1,1,0.1	cog1309	1	1	0.1
cog1314,1,1,0.1	cog1314	1	1	0.1
cog1378,1,1,0.1	cog1378	1	1	0.1
cog1385,1,1,0.1	cog1385	1	1	0.1
cog1388,1,1,0.1	cog1388	1	1	0.1
cog1393,1,1,0.1	cog1393	1	1	0.1
cog1396,1,1,0.1	cog1396	1	1	0.1
cog1413,1,1,0.1	cog1413	1	1	0.1
cog1418,1,1,0.1	cog1418	1	1	0.1
cog1420,1,1,0.1	cog1420	1	1	0.1
cog1427,1,1,0.1	cog1427	1	1	0.1
cog1452,1,1,0.1	cog1452	1	1	0.1
cog1466,1,1,0.1	cog1466	1	1	0.1
cog1475,1,1,0.1	cog1475	1	1	0.1
cog1480,1,1,0.1	cog1480	1	1	0.1
cog1486,1,1,0.1	cog1486	1	1	0.1
cog1533,1,1,0.1	cog1533	1	1	0.1
cog1538,1,1,0.1	cog1538	1	1	0.1
cog1539,1,1,0.1	cog1539	1	1	0.1
cog1546,1,1,0.1	cog1546	1	1	0.1
cog1551,1,1,0.1	cog1551	1	1	0.1
cog1555,1,1,0.1	cog1555	1	1	0.1
cog1578,1,1,0.1	cog1578	1	1	0.1
cog1597,1,1,0.1	cog1597	1	1	0.1
cog1600,1,1,0.1	cog1600	1	1	0.1
cog1610,1,1,0.1	cog1610	1	1	0.1
cog1653,1,1,0.1	cog1653	1	1	0.1
cog1682,1,1,0.1	cog1682	1	1	0.1
cog1695,1,1,0.1	cog1695	1	1	0.1
cog1702,1,1,0.1	cog1702	1	1	0.1
cog1706,1,1,0.1	cog1706	1	1	0.1
cog1716,1,1,0.1	cog1716	1	1	0.1
cog1732,1,1,0.1	cog1732	1	1	0.1
cog1744,1,1,0.1	cog1744	1	1	0.1
cog1792,1,1,0.1	cog1792	1	1	0.1
cog1797,1,1,0.1	cog1797	1	1	0.1
cog1820,1,1,0.1	cog1820	1	1	0.1
cog1872,1,1,0.1	cog1872	1	1	0.1
cog1882,1,1,0.1	cog1882	1	1	0.1
cog1914,1,1,0.1	cog1914	1	1	0.1
cog1917,1,1,0.1	cog1917	1	1	0.1
cog1940,1,1,0.1	cog1940	1	1	0.1
cog1947,1,1,0.1	cog1947	1	1	0.1
cog1954,1,1,0.1	cog1954	1	1	0.1
cog2003,1,1,0.1	cog2003	1	1	0.1
cog2084,1,1,0.1	cog2084	1	1	0.1
cog2120,1,1,0.1	cog2120	1	1	0.1
cog2131,1,1,0.1	cog2131	1	1	0.1
cog2135,1,1,0.1	cog2135	1	1	0.1
cog2206,1,1,0.1	cog2206	1	1	0.1
cog2229,1,1,0.1	cog2229	1	1	0.1
cog2264,1,1,0.1	cog2264	1	1	0.1
cog2267,1,1,0.1	cog2267	1	1	0.1
cog2274,1,1,0.1	cog2274	1	1	0.1
cog2304,1,1,0.1	cog2304	1	1	0.1
cog2309,1,1,0.1	cog2309	1	1	0.1
cog2315,1,1,0.1	cog2315	1	1	0.1
cog2319,1,1,0.1	cog2319	1	1	0.1
cog2333,1,1,0.1	cog2333	1	1	0.1
cog2352,1,1,0.1	cog2352	1	1	0.1
cog2378,1,1,0.1	cog2378	1	1	0.1
cog2382,1,1,0.1	cog2382	1	1	0.1
cog2819,1,1,0.1	cog2819	1	1	0.1
cog2821,1,1,0.1	cog2821	1	1	0.1
cog2827,1,1,0.1	cog2827	1	1	0.1
cog2839,1,1,0.1	cog2839	1	1	0.1
cog2846,1,1,0.1	cog2846	1	1	0.1
cog2905,1,1,0.1	cog2905	1	1	0.1
cog2911,1,1,0.1	cog2911	1	1	0.1
cog2971,1,1,0.1	cog2971	1	1	0.1
cog3027,1,1,0.1	cog3027	1	1	0.1
cog3039,1,1,0.1	cog3039	1	1	0.1
cog3200,1,1,0.1	cog3200	1	1	0.1
cog3217,1,1,0.1	cog3217	1	1	0.1
cog3228,1,1,0.1	cog3228	1	1	0.1
cog3246,1,1,0.1	cog3246	1	1	0.1
cog3323,1,1,0.1	cog3323	1	1	0.1
cog3380,1,1,0.1	cog3380	1	1	0.1
cog3387,1,1,0.1	cog3387	1	1	0.1
cog3425,1,1,0.1	cog3425	1	1	0.1
cog3429,1,1,0.1	cog3429	1	1	0.1
cog3631,1,1,0.1	cog3631	1	1	0.1
cog3655,1,1,0.1	cog3655	1	1	0.1
cog3696,1,1,0.1	cog3696	1	1	0.1
cog3707,1,1,0.1	cog3707	1	1	0.1
cog3708,1,1,0.1	cog3708	1	1	0.1
cog3725,1,1,0.1	cog3725	1	1	0.1
cog3823,1,1,0.1	cog3823	1	1	0.1
cog3842,1,1,0.1	cog3842	1	1	0.1
cog3845,1,1,0.1	cog3845	1	1	0.1
cog3859,1,1,0.1	cog3859	1	1	0.1
cog4121,1,1,0.1	cog4121	1	1	0.1
cog4392,1,1,0.1	cog4392	1	1	0.1
cog4542,1,1,0.1	cog4542	1	1	0.1
cog4550,1,1,0.1	cog4550	1	1	0.1
cog4603,1,1,0.1	cog4603	1	1	0.1
cog4608,1,1,0.1	cog4608	1	1	0.1
cog4767,1,1,0.1	cog4767	1	1	0.1
cog4826,1,1,0.1	cog4826	1	1	0.1
cog4932,1,1,0.1	cog4932	1	1	0.1
cog5002,1,1,0.1	cog5002	1	1	0.1
cog5610,1,1,0.1	cog5610	1	1	0.1
cog5646,1,1,0.1	cog5646	1	1	0.1
cog0327 cog1579,2,5,0.5	cog0327 cog1579	2	5	0.5
cog0327 cog2384,2,4,0.4	cog0327 cog2384	2	4	0.4
cog0568 cog0358,2,3,0.3	cog0568 cog0358	2	3	0.3
cog1131 cog0842,2,3,0.3	cog1131 cog0842	2	3	0.3
cog1671 cog0428,2,3,0.3	cog1671 cog0428	2	3	0.3
cog1984 cog1540,2,3,0.3	cog1984 cog1540	2	3	0.3
cog2049 cog1984,2,3,0.3	cog2049 cog1984	2	3	0.3
cog0010 cog1899,2,2,0.2	cog0010 cog1899	2	2	0.2
cog0013 cog0640,2,2,0.2	cog0013 cog0640	2	2	0.2
cog0024 cog1672,2,2,0.2	cog0024 cog1672	2	2	0.2
cog0041 cog1196,2,2,0.2	cog0041 cog1196	2	2	0.2
cog0076 cog4055,2,2,0.2	cog0076 cog4055	2	2	0.2
cog0102 cog0103,2,2,0.2	cog0102 cog0103	2	2	0.2
cog0226 cog4063,2,2,0.2	cog0226 cog4063	2	2	0.2
cog0231 cog5542,2,2,0.2	cog0231 cog5542	2	2	0.2
cog0240 cog0778,2,2,0.2	cog0240 cog0778	2	2	0.2
cog0258 cog3744,2,2,0.2	cog0258 cog3744	2	2	0.2
cog0311 cog1117,2,2,0.2	cog0311 cog1117	2	2	0.2
cog0327 cog0568,2,2,0.2	cog0327 cog0568	2	2	0.2
cog0327 cog2049,2,2,0.2	cog0327 cog2049	2	2	0.2
cog0327 cog2890,2,2,0.2	cog0327 cog2890	2	2	0.2
cog0335 cog0336,2,2,0.2	cog0335 cog0336	2	2	0.2
cog0343 cog2896,2,2,0.2	cog0343 cog2896	2	2	0.2
cog0388 cog0639,2,2,0.2	cog0388 cog0639	2	2	0.2
cog0396 cog0697,2,2,0.2	cog0396 cog0697	2	2	0.2
cog0406 cog0328,2,2,0.2	cog0406 cog0328	2	2	0.2
cog0415 cog3272,2,2,0.2	cog0415 cog3272	2	2	0.2
cog0500 cog0076,2,2,0.2	cog0500 cog0076	2	2	0.2
cog0502 cog4016,2,2,0.2	cog0502 cog4016	2	2	0.2
cog0531 cog1087,2,2,0.2	cog0531 cog1087	2	2	0.2
cog0553 cog1169,2,2,0.2	cog0553 cog1169	2	2	0.2
cog0572 cog0232,2,2,0.2	cog0572 cog0232	2	2	0.2
cog0573 cog4060,2,2,0.2	cog0573 cog4060	2	2	0.2
cog0581 cog1970,2,2,0.2	cog0581 cog1970	2	2	0.2
cog0589 cog4056,2,2,0.2	cog0589 cog4056	2	2	0.2
cog0615 cog4059,2,2,0.2	cog0615 cog4059	2	2	0.2
cog0622 cog0628,2,2,0.2	cog0622 cog0628	2	2	0.2
cog0628 cog1962,2,2,0.2	cog0628 cog1962	2	2	0.2
cog0639 cog1423,2,2,0.2	cog0639 cog1423	2	2	0.2
cog0639 cog4347,2,2,0.2	cog0639 cog4347	2	2	0.2
cog0640 cog1833,2,2,0.2	cog0640 cog1833	2	2	0.2
cog0655 cog4085,2,2,0.2	cog0655 cog4085	2	2	0.2
cog0665 cog2195,2,2,0.2	cog0665 cog2195	2	2	0.2
cog0671 cog0655,2,2,0.2	cog0671 cog0655	2	2	0.2
cog0697 cog2266,2,2,0.2	cog0697 cog2266	2	2	0.2
cog0704 cog0327,2,2,0.2	cog0704 cog0327	2	2	0.2
cog0719 cog0311,2,2,0.2	cog0719 cog0311	2	2	0.2
cog0747 cog1073,2,2,0.2	cog0747 cog1073	2	2	0.2
cog0751 cog0752,2,2,0.2	cog0751 cog0752	2	2	0.2
cog0767 cog0766,2,2,0.2	cog0767 cog0766	2	2	0.2
cog0834 cog0226,2,2,0.2	cog0834 cog0226	2	2	0.2
cog1014 cog1013,2,2,0.2	cog1014 cog1013	2	2	0.2
cog1087 cog0639,2,2,0.2	cog1087 cog0639	2	2	0.2
cog1117 cog4218,2,2,0.2	cog1117 cog4218	2	2	0.2
cog1209 cog1898,2,2,0.2	cog1209 cog1898	2	2	0.2
cog1290 cog0723,2,2,0.2	cog1290 cog0723	2	2	0.2
cog1306 cog1796,2,2,0.2	cog1306 cog1796	2	2	0.2
cog1322 cog1793,2,2,0.2	cog1322 cog1793	2	2	0.2
cog1348 cog0343,2,2,0.2	cog1348 cog0343	2	2	0.2
cog1423 cog1509,2,2,0.2	cog1423 cog1509	2	2	0.2
cog1509 cog0396,2,2,0.2	cog1509 cog0396	2	2	0.2
cog1672 cog4074,2,2,0.2	cog1672 cog4074	2	2	0.2
cog1697 cog0704,2,2,0.2	cog1697 cog0704	2	2	0.2
cog1833 cog4018,2,2,0.2	cog1833 cog4018	2	2	0.2
cog1873 cog0581,2,2,0.2	cog1873 cog0581	2	2	0.2
cog1899 cog0231,2,2,0.2	cog1899 cog0231	2	2	0.2
cog1962 cog0834,2,2,0.2	cog1962 cog0834	2	2	0.2
cog1970 cog1348,2,2,0.2	cog1970 cog1348	2	2	0.2
cog2010 cog0503,2,2,0.2	cog2010 cog0503	2	2	0.2
cog2016 cog0502,2,2,0.2	cog2016 cog0502	2	2	0.2
cog2039 cog1683,2,2,0.2	cog2039 cog1683	2	2	0.2
cog2266 cog1697,2,2,0.2	cog2266 cog1697	2	2	0.2
cog2384 cog0665,2,2,0.2	cog2384 cog0665	2	2	0.2
cog2384 cog1579,2,2,0.2	cog2384 cog1579	2	2	0.2
cog2890 cog5431,2,2,0.2	cog2890 cog5431	2	2	0.2
cog2893 cog1925,2,2,0.2	cog2893 cog1925	2	2	0.2
cog2896 cog0622,2,2,0.2	cog2896 cog0622	2	2	0.2
cog2957 cog4062,2,2,0.2	cog2957 cog4062	2	2	0.2
cog3272 cog2039,2,2,0.2	cog3272 cog2039	2	2	0.2
cog3817 cog3819,2,2,0.2	cog3817 cog3819	2	2	0.2
cog4015 cog0013,2,2,0.2	cog4015 cog0013	2	2	0.2
cog4016 cog4019,2,2,0.2	cog4016 cog4019	2	2	0.2
cog4017 cog2016,2,2,0.2	cog4017 cog2016	2	2	0.2
cog4018 cog0024,2,2,0.2	cog4018 cog0024	2	2	0.2
cog4019 cog4015,2,2,0.2	cog4019 cog4015	2	2	0.2
cog4054 cog0719,2,2,0.2	cog4054 cog0719	2	2	0.2
cog4055 cog4054,2,2,0.2	cog4055 cog4054	2	2	0.2
cog4056 cog0615,2,2,0.2	cog4056 cog0615	2	2	0.2
cog4057 cog0589,2,2,0.2	cog4057 cog0589	2	2	0.2
cog4058 cog1873,2,2,0.2	cog4058 cog1873	2	2	0.2
cog4059 cog4058,2,2,0.2	cog4059 cog4058	2	2	0.2
cog4060 cog4061,2,2,0.2	cog4060 cog4061	2	2	0.2
cog4061 cog2957,2,2,0.2	cog4061 cog2957	2	2	0.2
cog4062 cog0388,2,2,0.2	cog4062 cog0388	2	2	0.2
cog4063 cog4064,2,2,0.2	cog4063 cog4064	2	2	0.2
cog4064 cog4065,2,2,0.2	cog4064 cog4065	2	2	0.2
cog4065 cog0573,2,2,0.2	cog4065 cog0573	2	2	0.2
cog4074 cog0010,2,2,0.2	cog4074 cog0010	2	2	0.2
cog4085 cog0500,2,2,0.2	cog4085 cog0500	2	2	0.2
cog4218 cog4057,2,2,0.2	cog4218 cog4057	2	2	0.2
cog5431 cog4017,2,2,0.2	cog5431 cog4017	2	2	0.2
cog5542 cog0671,2,2,0.2	cog5542 cog0671	2	2	0.2
cog0008 cog0457,2,1,0.1	cog0008 cog0457	2	1	0.1
cog0008 cog2893,2,1,0.1	cog0008 cog2893	2	1	0.1
cog0009 cog0735,2,1,0.1	cog0009 cog0735	2	1	0.1
cog0009 cog0767,2,1,0.1	cog0009 cog0767	2	1	0.1
cog0016 cog0177,2,1,0.1	cog0016 cog0177	2	1	0.1
cog0033 cog0582,2,1,0.1	cog0033 cog0582	2	1	0.1
cog0036 cog1104,2,1,0.1	cog0036 cog1104	2	1	0.1
cog0037 cog0016,2,1,0.1	cog0037 cog0016	2	1	0.1
cog0040 cog1028,2,1,0.1	cog0040 cog1028	2	1	0.1
cog0040 cog2060,2,1,0.1	cog0040 cog2060	2	1	0.1
cog0040 cog5212,2,1,0.1	cog0040 cog5212	2	1	0.1
cog0041 cog0494,2,1,0.1	cog0041 cog0494	2	1	0.1
cog0052 cog1386,2,1,0.1	cog0052 cog1386	2	1	0.1
cog0052 cog1806,2,1,0.1	cog0052 cog1806	2	1	0.1
cog0075 cog1427,2,1,0.1	cog0075 cog1427	2	1	0.1
cog0079 cog0406,2,1,0.1	cog0079 cog0406	2	1	0.1
cog0079 cog0494,2,1,0.1	cog0079 cog0494	2	1	0.1
cog0079 cog0583,2,1,0.1	cog0079 cog0583	2	1	0.1
cog0079 cog0617,2,1,0.1	cog0079 cog0617	2	1	0.1
cog0079 cog3935,2,1,0.1	cog0079 cog3935	2	1	0.1
cog0103 cog0491,2,1,0.1	cog0103 cog0491	2	1	0.1
cog0103 cog1982,2,1,0.1	cog0103 cog1982	2	1	0.1
cog0110 cog0079,2,1,0.1	cog0110 cog0079	2	1	0.1
cog0110 cog0766,2,1,0.1	cog0110 cog0766	2	1	0.1
cog0115 cog0544,2,1,0.1	cog0115 cog0544	2	1	0.1
cog0115 cog2309,2,1,0.1	cog0115 cog2309	2	1	0.1
cog0116 cog0635,2,1,0.1	cog0116 cog0635	2	1	0.1
cog0116 cog1306,2,1,0.1	cog0116 cog1306	2	1	0.1
cog0125 cog0735,2,1,0.1	cog0125 cog0735	2	1	0.1
cog0125 cog1430,2,1,0.1	cog0125 cog1430	2	1	0.1
cog0130 cog3708,2,1,0.1	cog0130 cog3708	2	1	0.1
cog0136 cog1466,2,1,0.1	cog0136 cog1466	2	1	0.1
cog0141 cog0477,2,1,0.1	cog0141 cog0477	2	1	0.1
cog0141 cog1144,2,1,0.1	cog0141 cog1144	2	1	0.1
cog0141 cog2911,2,1,0.1	cog0141 cog2911	2	1	0.1
cog0145 cog1028,2,1,0.1	cog0145 cog1028	2	1	0.1
cog0146 cog2229,2,1,0.1	cog0146 cog2229	2	1	0.1
cog0147 cog0525,2,1,0.1	cog0147 cog0525	2	1	0.1
cog0147 cog1475,2,1,0.1	cog0147 cog1475	2	1	0.1
cog0147 cog1716,2,1,0.1	cog0147 cog1716	2	1	0.1
cog0152 cog0178,2,1,0.1	cog0152 cog0178	2	1	0.1
cog0157 cog1792,2,1,0.1	cog0157 cog1792	2	1	0.1
cog0162 cog0264,2,1,0.1	cog0162 cog0264	2	1	0.1
cog0173 cog2314,2,1,0.1	cog0173 cog2314	2	1	0.1
cog0177 cog0152,2,1,0.1	cog0177 cog0152	2	1	0.1
cog0177 cog0568,2,1,0.1	cog0177 cog0568	2	1	0.1
cog0177 cog0761,2,1,0.1	cog0177 cog0761	2	1	0.1
cog0177 cog1196,2,1,0.1	cog0177 cog1196	2	1	0.1
cog0178 cog1131,2,1,0.1	cog0178 cog1131	2	1	0.1
cog0179 cog1322,2,1,0.1	cog0179 cog1322	2	1	0.1
cog0183 cog0576,2,1,0.1	cog0183 cog0576	2	1	0.1
cog0205 cog2270,2,1,0.1	cog0205 cog2270	2	1	0.1
cog0206 cog1112,2,1,0.1	cog0206 cog1112	2	1	0.1
cog0210 cog0236,2,1,0.1	cog0210 cog0236	2	1	0.1
cog0210 cog0756,2,1,0.1	cog0210 cog0756	2	1	0.1
cog0210 cog1366,2,1,0.1	cog0210 cog1366	2	1	0.1
cog0215 cog0327,2,1,0.1	cog0215 cog0327	2	1	0.1
cog0215 cog2969,2,1,0.1	cog0215 cog2969	2	1	0.1
cog0217 cog1011,2,1,0.1	cog0217 cog1011	2	1	0.1
cog0217 cog4118,2,1,0.1	cog0217 cog4118	2	1	0.1
cog0221 cog0607,2,1,0.1	cog0221 cog0607	2	1	0.1
cog0221 cog0693,2,1,0.1	cog0221 cog0693	2	1	0.1
cog0225 cog0206,2,1,0.1	cog0225 cog0206	2	1	0.1
cog0225 cog1060,2,1,0.1	cog0225 cog1060	2	1	0.1
cog0225 cog2839,2,1,0.1	cog0225 cog2839	2	1	0.1
cog0228 cog0806,2,1,0.1	cog0228 cog0806	2	1	0.1
cog0228 cog1763,2,1,0.1	cog0228 cog1763	2	1	0.1
cog0228 cog1837,2,1,0.1	cog0228 cog1837	2	1	0.1
cog0232 cog0801,2,1,0.1	cog0232 cog0801	2	1	0.1
cog0232 cog1293,2,1,0.1	cog0232 cog1293	2	1	0.1
cog0232 cog3937,2,1,0.1	cog0232 cog3937	2	1	0.1
cog0236 cog1295,2,1,0.1	cog0236 cog1295	2	1	0.1
cog0236 cog1872,2,1,0.1	cog0236 cog1872	2	1	0.1
cog0240 cog0720,2,1,0.1	cog0240 cog0720	2	1	0.1
cog0240 cog2821,2,1,0.1	cog0240 cog2821	2	1	0.1
cog0240 cog3272,2,1,0.1	cog0240 cog3272	2	1	0.1
cog0245 cog1211,2,1,0.1	cog0245 cog1211	2	1	0.1
cog0245 cog1290,2,1,0.1	cog0245 cog1290	2	1	0.1
cog0249 cog3655,2,1,0.1	cog0249 cog3655	2	1	0.1
cog0264 cog0052,2,1,0.1	cog0264 cog0052	2	1	0.1
cog0264 cog0258,2,1,0.1	cog0264 cog0258	2	1	0.1
cog0266 cog0415,2,1,0.1	cog0266 cog0415	2	1	0.1
cog0266 cog1194,2,1,0.1	cog0266 cog1194	2	1	0.1
cog0266 cog1519,2,1,0.1	cog0266 cog1519	2	1	0.1
cog0268 cog2094,2,1,0.1	cog0268 cog2094	2	1	0.1
cog0271 cog1014,2,1,0.1	cog0271 cog1014	2	1	0.1
cog0271 cog1052,2,1,0.1	cog0271 cog1052	2	1	0.1
cog0271 cog2084,2,1,0.1	cog0271 cog2084	2	1	0.1
cog0272 cog0481,2,1,0.1	cog0272 cog0481	2	1	0.1
cog0272 cog0572,2,1,0.1	cog0272 cog0572	2	1	0.1
cog0295 cog4932,2,1,0.1	cog0295 cog4932	2	1	0.1
cog0319 cog1159,2,1,0.1	cog0319 cog1159	2	1	0.1
cog0319 cog1882,2,1,0.1	cog0319 cog1882	2	1	0.1
cog0323 cog0327,2,1,0.1	cog0323 cog0327	2	1	0.1
cog0324 cog1917,2,1,0.1	cog0324 cog1917	2	1	0.1
cog0327 cog0115,2,1,0.1	cog0327 cog0115	2	1	0.1
cog0327 cog0125,2,1,0.1	cog0327 cog0125	2	1	0.1
cog0327 cog0327,2,1,0.1	cog0327 cog0327	2	1	0.1
cog0327 cog0597,2,1,0.1	cog0327 cog0597	2	1	0.1
cog0327 cog1194,2,1,0.1	cog0327 cog1194	2	1	0.1
cog0327 cog1995,2,1,0.1	cog0327 cog1995	2	1	0.1
cog0327 cog3481,2,1,0.1	cog0327 cog3481	2	1	0.1
cog0328 cog0008,2,1,0.1	cog0328 cog0008	2	1	0.1
cog0328 cog0079,2,1,0.1	cog0328 cog0079	2	1	0.1
cog0328 cog0665,2,1,0.1	cog0328 cog0665	2	1	0.1
cog0328 cog1174,2,1,0.1	cog0328 cog1174	2	1	0.1
cog0328 cog1293,2,1,0.1	cog0328 cog1293	2	1	0.1
cog0329 cog4720,2,1,0.1	cog0329 cog4720	2	1	0.1
cog0330 cog1216,2,1,0.1	cog0330 cog1216	2	1	0.1
cog0335 cog1671,2,1,0.1	cog0335 cog1671	2	1	0.1
cog0336 cog0767,2,1,0.1	cog0336 cog0767	2	1	0.1
cog0336 cog0806,2,1,0.1	cog0336 cog0806	2	1	0.1
cog0336 cog1354,2,1,0.1	cog0336 cog1354	2	1	0.1
cog0344 cog0694,2,1,0.1	cog0344 cog0694	2	1	0.1
cog0344 cog1196,2,1,0.1	cog0344 cog1196	2	1	0.1
cog0346 cog3246,2,1,0.1	cog0346 cog3246	2	1	0.1
cog0346 cog3823,2,1,0.1	cog0346 cog3823	2	1	0.1
cog0351 cog0336,2,1,0.1	cog0351 cog0336	2	1	0.1
cog0351 cog1058,2,1,0.1	cog0351 cog1058	2	1	0.1
cog0351 cog3725,2,1,0.1	cog0351 cog3725	2	1	0.1
cog0352 cog0110,2,1,0.1	cog0352 cog0110	2	1	0.1
cog0352 cog0351,2,1,0.1	cog0352 cog0351	2	1	0.1
cog0358 cog0327,2,1,0.1	cog0358 cog0327	2	1	0.1
cog0358 cog0423,2,1,0.1	cog0358 cog0423	2	1	0.1
cog0358 cog0648,2,1,0.1	cog0358 cog0648	2	1	0.1
cog0358 cog0661,2,1,0.1	cog0358 cog0661	2	1	0.1
cog0358 cog0752,2,1,0.1	cog0358 cog0752	2	1	0.1
cog0358 cog3935,2,1,0.1	cog0358 cog3935	2	1	0.1
cog0363 cog1600,2,1,0.1	cog0363 cog1600	2	1	0.1
cog0364 cog1028,2,1,0.1	cog0364 cog1028	2	1	0.1
cog0390 cog0327,2,1,0.1	cog0390 cog0327	2	1	0.1
cog0392 cog0438,2,1,0.1	cog0392 cog0438	2	1	0.1
cog0395 cog0557,2,1,0.1	cog0395 cog0557	2	1	0.1
cog0406 cog0327,2,1,0.1	cog0406 cog0327	2	1	0.1
cog0415 cog0240,2,1,0.1	cog0415 cog0240	2	1	0.1
cog0423 cog0415,2,1,0.1	cog0423 cog0415	2	1	0.1
cog0423 cog2384,2,1,0.1	cog0423 cog2384	2	1	0.1
cog0426 cog0327,2,1,0.1	cog0426 cog0327	2	1	0.1
cog0428 cog0052,2,1,0.1	cog0428 cog0052	2	1	0.1
cog0428 cog0513,2,1,0.1	cog0428 cog0513	2	1	0.1
cog0428 cog1806,2,1,0.1	cog0428 cog1806	2	1	0.1
cog0436 cog0390,2,1,0.1	cog0436 cog0390	2	1	0.1
cog0438 cog0141,2,1,0.1	cog0438 cog0141	2	1	0.1
cog0438 cog1820,2,1,0.1	cog0438 cog1820	2	1	0.1
cog0441 cog0272,2,1,0.1	cog0441 cog0272	2	1	0.1
cog0441 cog0542,2,1,0.1	cog0441 cog0542	2	1	0.1
cog0443 cog1249,2,1,0.1	cog0443 cog1249	2	1	0.1
cog0444 cog3429,2,1,0.1	cog0444 cog3429	2	1	0.1
cog0451 cog0658,2,1,0.1	cog0451 cog0658	2	1	0.1
cog0452 cog0036,2,1,0.1	cog0452 cog0036	2	1	0.1
cog0452 cog2197,2,1,0.1	cog0452 cog2197	2	1	0.1
cog0454 cog1124,2,1,0.1	cog0454 cog1124	2	1	0.1
cog0454 cog1165,2,1,0.1	cog0454 cog1165	2	1	0.1
cog0457 cog0215,2,1,0.1	cog0457 cog0215	2	1	0.1
cog0457 cog0323,2,1,0.1	cog0457 cog0323	2	1	0.1
cog0457 cog0596,2,1,0.1	cog0457 cog0596	2	1	0.1
cog0457 cog1225,2,1,0.1	cog0457 cog1225	2	1	0.1
cog0457 cog1995,2,1,0.1	cog0457 cog1995	2	1	0.1
cog0457 cog2873,2,1,0.1	cog0457 cog2873	2	1	0.1
cog0461 cog1486,2,1,0.1	cog0461 cog1486	2	1	0.1
cog0461 cog2220,2,1,0.1	cog0461 cog2220	2	1	0.1
cog0463 cog0515,2,1,0.1	cog0463 cog0515	2	1	0.1
cog0463 cog0562,2,1,0.1	cog0463 cog0562	2	1	0.1
cog0466 cog1354,2,1,0.1	cog0466 cog1354	2	1	0.1
cog0466 cog3845,2,1,0.1	cog0466 cog3845	2	1	0.1
cog0468 cog0531,2,1,0.1	cog0468 cog0531	2	1	0.1
cog0477 cog0625,2,1,0.1	cog0477 cog0625	2	1	0.1
cog0477 cog3113,2,1,0.1	cog0477 cog3113	2	1	0.1
cog0477 cog3323,2,1,0.1	cog0477 cog3323	2	1	0.1
cog0477 cog3859,2,1,0.1	cog0477 cog3859	2	1	0.1
cog0481 cog1141,2,1,0.1	cog0481 cog1141	2	1	0.1
cog0481 cog1853,2,1,0.1	cog0481 cog1853	2	1	0.1
cog0484 cog0272,2,1,0.1	cog0484 cog0272	2	1	0.1
cog0488 cog4767,2,1,0.1	cog0488 cog4767	2	1	0.1
cog0491 cog0179,2,1,0.1	cog0491 cog0179	2	1	0.1
cog0491 cog3133,2,1,0.1	cog0491 cog3133	2	1	0.1
cog0494 cog0268,2,1,0.1	cog0494 cog0268	2	1	0.1
cog0494 cog0749,2,1,0.1	cog0494 cog0749	2	1	0.1
cog0494 cog1108,2,1,0.1	cog0494 cog1108	2	1	0.1
cog0494 cog1430,2,1,0.1	cog0494 cog1430	2	1	0.1
cog0500 cog0541,2,1,0.1	cog0500 cog0541	2	1	0.1
cog0500 cog1496,2,1,0.1	cog0500 cog1496	2	1	0.1
cog0500 cog5212,2,1,0.1	cog0500 cog5212	2	1	0.1
cog0503 cog0655,2,1,0.1	cog0503 cog0655	2	1	0.1
cog0503 cog0751,2,1,0.1	cog0503 cog0751	2	1	0.1
cog0503 cog1108,2,1,0.1	cog0503 cog1108	2	1	0.1
cog0513 cog0358,2,1,0.1	cog0513 cog0358	2	1	0.1
cog0513 cog0539,2,1,0.1	cog0513 cog0539	2	1	0.1
cog0513 cog0648,2,1,0.1	cog0513 cog0648	2	1	0.1
cog0513 cog0699,2,1,0.1	cog0513 cog0699	2	1	0.1
cog0513 cog1284,2,1,0.1	cog0513 cog1284	2	1	0.1
cog0515 cog0517,2,1,0.1	cog0515 cog0517	2	1	0.1
cog0517 cog0793,2,1,0.1	cog0517 cog0793	2	1	0.1
cog0520 cog0647,2,1,0.1	cog0520 cog0647	2	1	0.1
cog0525 cog2094,2,1,0.1	cog0525 cog2094	2	1	0.1
cog0525 cog3842,2,1,0.1	cog0525 cog3842	2	1	0.1
cog0525 cog4912,2,1,0.1	cog0525 cog4912	2	1	0.1
cog0526 cog0457,2,1,0.1	cog0526 cog0457	2	1	0.1
cog0527 cog0735,2,1,0.1	cog0527 cog0735	2	1	0.1
cog0531 cog1322,2,1,0.1	cog0531 cog1322	2	1	0.1
cog0531 cog3467,2,1,0.1	cog0531 cog3467	2	1	0.1
cog0539 cog3228,2,1,0.1	cog0539 cog3228	2	1	0.1
cog0541 cog0162,2,1,0.1	cog0541 cog0162	2	1	0.1
cog0541 cog0228,2,1,0.1	cog0541 cog0228	2	1	0.1
cog0541 cog0335,2,1,0.1	cog0541 cog0335	2	1	0.1
cog0541 cog3817,2,1,0.1	cog0541 cog3817	2	1	0.1
cog0542 cog0572,2,1,0.1	cog0542 cog0572	2	1	0.1
cog0542 cog1671,2,1,0.1	cog0542 cog1671	2	1	0.1
cog0544 cog0352,2,1,0.1	cog0544 cog0352	2	1	0.1
cog0544 cog0466,2,1,0.1	cog0544 cog0466	2	1	0.1
cog0548 cog2156,2,1,0.1	cog0548 cog2156	2	1	0.1
cog0557 cog1653,2,1,0.1	cog0557 cog1653	2	1	0.1
cog0558 cog0605,2,1,0.1	cog0558 cog0605	2	1	0.1
cog0562 cog0605,2,1,0.1	cog0562 cog0605	2	1	0.1
cog0563 cog1555,2,1,0.1	cog0563 cog1555	2	1	0.1
cog0564 cog0079,2,1,0.1	cog0564 cog0079	2	1	0.1
cog0564 cog0327,2,1,0.1	cog0564 cog0327	2	1	0.1
cog0564 cog0682,2,1,0.1	cog0564 cog0682	2	1	0.1
cog0564 cog0752,2,1,0.1	cog0564 cog0752	2	1	0.1
cog0568 cog0266,2,1,0.1	cog0568 cog0266	2	1	0.1
cog0568 cog1191,2,1,0.1	cog0568 cog1191	2	1	0.1
cog0568 cog1897,2,1,0.1	cog0568 cog1897	2	1	0.1
cog0568 cog4542,2,1,0.1	cog0568 cog4542	2	1	0.1
cog0576 cog2131,2,1,0.1	cog0576 cog2131	2	1	0.1
cog0577 cog0102,2,1,0.1	cog0577 cog0102	2	1	0.1
cog0582 cog1109,2,1,0.1	cog0582 cog1109	2	1	0.1
cog0582 cog3104,2,1,0.1	cog0582 cog3104	2	1	0.1
cog0583 cog0271,2,1,0.1	cog0583 cog0271	2	1	0.1
cog0583 cog2969,2,1,0.1	cog0583 cog2969	2	1	0.1
cog0591 cog2378,2,1,0.1	cog0591 cog2378	2	1	0.1
cog0595 cog0812,2,1,0.1	cog0595 cog0812	2	1	0.1
cog0596 cog0205,2,1,0.1	cog0596 cog0205	2	1	0.1
cog0596 cog0454,2,1,0.1	cog0596 cog0454	2	1	0.1
cog0596 cog0595,2,1,0.1	cog0596 cog0595	2	1	0.1
cog0596 cog1165,2,1,0.1	cog0596 cog1165	2	1	0.1
cog0596 cog4508,2,1,0.1	cog0596 cog4508	2	1	0.1
cog0597 cog0761,2,1,0.1	cog0597 cog0761	2	1	0.1
cog0597 cog1137,2,1,0.1	cog0597 cog1137	2	1	0.1
cog0601 cog0364,2,1,0.1	cog0601 cog0364	2	1	0.1
cog0601 cog0641,2,1,0.1	cog0601 cog0641	2	1	0.1
cog0601 cog0793,2,1,0.1	cog0601 cog0793	2	1	0.1
cog0603 cog0040,2,1,0.1	cog0603 cog0040	2	1	0.1
cog0603 cog1388,2,1,0.1	cog0603 cog1388	2	1	0.1
cog0605 cog0327,2,1,0.1	cog0605 cog0327	2	1	0.1
cog0605 cog1606,2,1,0.1	cog0605 cog1606	2	1	0.1
cog0607 cog1837,2,1,0.1	cog0607 cog1837	2	1	0.1
cog0607 cog2267,2,1,0.1	cog0607 cog2267	2	1	0.1
cog0607 cog3631,2,1,0.1	cog0607 cog3631	2	1	0.1
cog0612 cog1524,2,1,0.1	cog0612 cog1524	2	1	0.1
cog0612 cog3387,2,1,0.1	cog0612 cog3387	2	1	0.1
cog0617 cog1682,2,1,0.1	cog0617 cog1682	2	1	0.1
cog0620 cog1160,2,1,0.1	cog0620 cog1160	2	1	0.1
cog0625 cog0245,2,1,0.1	cog0625 cog0245	2	1	0.1
cog0625 cog1290,2,1,0.1	cog0625 cog1290	2	1	0.1
cog0626 cog0146,2,1,0.1	cog0626 cog0146	2	1	0.1
cog0626 cog1192,2,1,0.1	cog0626 cog1192	2	1	0.1
cog0628 cog0329,2,1,0.1	cog0628 cog0329	2	1	0.1
cog0634 cog1211,2,1,0.1	cog0634 cog1211	2	1	0.1
cog0634 cog3027,2,1,0.1	cog0634 cog3027	2	1	0.1
cog0635 cog1306,2,1,0.1	cog0635 cog1306	2	1	0.1
cog0641 cog0596,2,1,0.1	cog0641 cog0596	2	1	0.1
cog0645 cog0327,2,1,0.1	cog0645 cog0327	2	1	0.1
cog0647 cog0607,2,1,0.1	cog0647 cog0607	2	1	0.1
cog0648 cog0513,2,1,0.1	cog0648 cog0513	2	1	0.1
cog0648 cog0542,2,1,0.1	cog0648 cog0542	2	1	0.1
cog0648 cog0778,2,1,0.1	cog0648 cog0778	2	1	0.1
cog0648 cog1806,2,1,0.1	cog0648 cog1806	2	1	0.1
cog0655 cog0249,2,1,0.1	cog0655 cog0249	2	1	0.1
cog0655 cog0525,2,1,0.1	cog0655 cog0525	2	1	0.1
cog0655 cog1683,2,1,0.1	cog0655 cog1683	2	1	0.1
cog0656 cog0760,2,1,0.1	cog0656 cog0760	2	1	0.1
cog0658 cog0454,2,1,0.1	cog0658 cog0454	2	1	0.1
cog0661 cog0441,2,1,0.1	cog0661 cog0441	2	1	0.1
cog0661 cog1159,2,1,0.1	cog0661 cog1159	2	1	0.1
cog0665 cog0568,2,1,0.1	cog0665 cog0568	2	1	0.1
cog0666 cog0864,2,1,0.1	cog0666 cog0864	2	1	0.1
cog0673 cog0801,2,1,0.1	cog0673 cog0801	2	1	0.1
cog0674 cog0327,2,1,0.1	cog0674 cog0327	2	1	0.1
cog0674 cog4508,2,1,0.1	cog0674 cog4508	2	1	0.1
cog0682 cog0041,2,1,0.1	cog0682 cog0041	2	1	0.1
cog0682 cog0240,2,1,0.1	cog0682 cog0240	2	1	0.1
cog0682 cog0415,2,1,0.1	cog0682 cog0415	2	1	0.1
cog0685 cog1134,2,1,0.1	cog0685 cog1134	2	1	0.1
cog0691 cog3200,2,1,0.1	cog0691 cog3200	2	1	0.1
cog0693 cog0327,2,1,0.1	cog0693 cog0327	2	1	0.1
cog0694 cog0648,2,1,0.1	cog0694 cog0648	2	1	0.1
cog0695 cog1692,2,1,0.1	cog0695 cog1692	2	1	0.1
cog0695 cog1897,2,1,0.1	cog0695 cog1897	2	1	0.1
cog0695 cog2060,2,1,0.1	cog0695 cog2060	2	1	0.1
cog0699 cog0503,2,1,0.1	cog0699 cog0503	2	1	0.1
cog0699 cog0695,2,1,0.1	cog0699 cog0695	2	1	0.1
cog0699 cog1366,2,1,0.1	cog0699 cog1366	2	1	0.1
cog0720 cog0626,2,1,0.1	cog0720 cog0626	2	1	0.1
cog0720 cog0674,2,1,0.1	cog0720 cog0674	2	1	0.1
cog0723 cog0102,2,1,0.1	cog0723 cog0102	2	1	0.1
cog0723 cog2857,2,1,0.1	cog0723 cog2857	2	1	0.1
cog0727 cog0674,2,1,0.1	cog0727 cog0674	2	1	0.1
cog0727 cog0720,2,1,0.1	cog0727 cog0720	2	1	0.1
cog0728 cog0729,2,1,0.1	cog0728 cog0729	2	1	0.1
cog0729 cog0438,2,1,0.1	cog0729 cog0438	2	1	0.1
cog0730 cog0822,2,1,0.1	cog0730 cog0822	2	1	0.1
cog0735 cog0727,2,1,0.1	cog0735 cog0727	2	1	0.1
cog0735 cog1132,2,1,0.1	cog0735 cog1132	2	1	0.1
cog0735 cog1702,2,1,0.1	cog0735 cog1702	2	1	0.1
cog0735 cog1802,2,1,0.1	cog0735 cog1802	2	1	0.1
cog0739 cog0037,2,1,0.1	cog0739 cog0037	2	1	0.1
cog0739 cog0130,2,1,0.1	cog0739 cog0130	2	1	0.1
cog0745 cog0040,2,1,0.1	cog0745 cog0040	2	1	0.1
cog0745 cog2205,2,1,0.1	cog0745 cog2205	2	1	0.1
cog0747 cog0601,2,1,0.1	cog0747 cog0601	2	1	0.1
cog0749 cog0258,2,1,0.1	cog0749 cog0258	2	1	0.1
cog0749 cog0806,2,1,0.1	cog0749 cog0806	2	1	0.1
cog0751 cog0749,2,1,0.1	cog0751 cog0749	2	1	0.1
cog0751 cog2827,2,1,0.1	cog0751 cog2827	2	1	0.1
cog0752 cog0177,2,1,0.1	cog0752 cog0177	2	1	0.1
cog0752 cog0240,2,1,0.1	cog0752 cog0240	2	1	0.1
cog0752 cog0564,2,1,0.1	cog0752 cog0564	2	1	0.1
cog0752 cog1227,2,1,0.1	cog0752 cog1227	2	1	0.1
cog0752 cog1519,2,1,0.1	cog0752 cog1519	2	1	0.1
cog0756 cog0079,2,1,0.1	cog0756 cog0079	2	1	0.1
cog0760 cog0358,2,1,0.1	cog0760 cog0358	2	1	0.1
cog0760 cog0761,2,1,0.1	cog0760 cog0761	2	1	0.1
cog0760 cog1432,2,1,0.1	cog0760 cog1432	2	1	0.1
cog0760 cog1732,2,1,0.1	cog0760 cog1732	2	1	0.1
cog0761 cog0264,2,1,0.1	cog0761 cog0264	2	1	0.1
cog0761 cog0494,2,1,0.1	cog0761 cog0494	2	1	0.1
cog0761 cog1227,2,1,0.1	cog0761 cog1227	2	1	0.1
cog0766 cog0228,2,1,0.1	cog0766 cog0228	2	1	0.1
cog0766 cog2135,2,1,0.1	cog0766 cog2135	2	1	0.1
cog0766 cog2854,2,1,0.1	cog0766 cog2854	2	1	0.1
cog0766 cog4603,2,1,0.1	cog0766 cog4603	2	1	0.1
cog0767 cog1108,2,1,0.1	cog0767 cog1108	2	1	0.1
cog0768 cog1296,2,1,0.1	cog0768 cog1296	2	1	0.1
cog0769 cog0607,2,1,0.1	cog0769 cog0607	2	1	0.1
cog0778 cog0541,2,1,0.1	cog0778 cog0541	2	1	0.1
cog0778 cog0682,2,1,0.1	cog0778 cog0682	2	1	0.1
cog0778 cog0826,2,1,0.1	cog0778 cog0826	2	1	0.1
cog0789 cog1802,2,1,0.1	cog0789 cog1802	2	1	0.1
cog0789 cog2003,2,1,0.1	cog0789 cog2003	2	1	0.1
cog0793 cog0457,2,1,0.1	cog0793 cog0457	2	1	0.1
cog0793 cog1028,2,1,0.1	cog0793 cog1028	2	1	0.1
cog0799 cog3696,2,1,0.1	cog0799 cog3696	2	1	0.1
cog0801 cog0217,2,1,0.1	cog0801 cog0217	2	1	0.1
cog0801 cog0327,2,1,0.1	cog0801 cog0327	2	1	0.1
cog0806 cog0699,2,1,0.1	cog0806 cog0699	2	1	0.1
cog0806 cog1463,2,1,0.1	cog0806 cog1463	2	1	0.1
cog0806 cog1744,2,1,0.1	cog0806 cog1744	2	1	0.1
cog0812 cog1124,2,1,0.1	cog0812 cog1124	2	1	0.1
cog0818 cog0494,2,1,0.1	cog0818 cog0494	2	1	0.1
cog0821 cog0826,2,1,0.1	cog0821 cog0826	2	1	0.1
cog0822 cog0344,2,1,0.1	cog0822 cog0344	2	1	0.1
cog0826 cog0041,2,1,0.1	cog0826 cog0041	2	1	0.1
cog0826 cog0828,2,1,0.1	cog0826 cog0828	2	1	0.1
cog0826 cog1802,2,1,0.1	cog0826 cog1802	2	1	0.1
cog0826 cog2039,2,1,0.1	cog0826 cog2039	2	1	0.1
cog0826 cog3817,2,1,0.1	cog0826 cog3817	2	1	0.1
cog0828 cog0488,2,1,0.1	cog0828 cog0488	2	1	0.1
cog0840 cog0426,2,1,0.1	cog0840 cog0426	2	1	0.1
cog0842 cog0215,2,1,0.1	cog0842 cog0215	2	1	0.1
cog0842 cog0463,2,1,0.1	cog0842 cog0463	2	1	0.1
cog0842 cog0466,2,1,0.1	cog0842 cog0466	2	1	0.1
cog0845 cog1706,2,1,0.1	cog0845 cog1706	2	1	0.1
cog0864 cog1393,2,1,0.1	cog0864 cog1393	2	1	0.1
cog1011 cog0768,2,1,0.1	cog1011 cog0768	2	1	0.1
cog1011 cog3103,2,1,0.1	cog1011 cog3103	2	1	0.1
cog1013 cog0009,2,1,0.1	cog1013 cog0009	2	1	0.1
cog1013 cog1763,2,1,0.1	cog1013 cog1763	2	1	0.1
cog1023 cog0075,2,1,0.1	cog1023 cog0075	2	1	0.1
cog1028 cog0596,2,1,0.1	cog1028 cog0596	2	1	0.1
cog1028 cog0620,2,1,0.1	cog1028 cog0620	2	1	0.1
cog1028 cog0695,2,1,0.1	cog1028 cog0695	2	1	0.1
cog1028 cog1692,2,1,0.1	cog1028 cog1692	2	1	0.1
cog1028 cog4608,2,1,0.1	cog1028 cog4608	2	1	0.1
cog1051 cog3103,2,1,0.1	cog1051 cog3103	2	1	0.1
cog1052 cog3104,2,1,0.1	cog1052 cog3104	2	1	0.1
cog1057 cog0666,2,1,0.1	cog1057 cog0666	2	1	0.1
cog1058 cog0443,2,1,0.1	cog1058 cog0443	2	1	0.1
cog1060 cog1023,2,1,0.1	cog1060 cog1023	2	1	0.1
cog1063 cog0346,2,1,0.1	cog1063 cog0346	2	1	0.1
cog1073 cog0457,2,1,0.1	cog1073 cog0457	2	1	0.1
cog1073 cog0601,2,1,0.1	cog1073 cog0601	2	1	0.1
cog1079 cog0327,2,1,0.1	cog1079 cog0327	2	1	0.1
cog1080 cog0634,2,1,0.1	cog1080 cog0634	2	1	0.1
cog1080 cog3467,2,1,0.1	cog1080 cog3467	2	1	0.1
cog1087 cog0463,2,1,0.1	cog1087 cog0463	2	1	0.1
cog1088 cog0177,2,1,0.1	cog1088 cog0177	2	1	0.1
cog1088 cog0648,2,1,0.1	cog1088 cog0648	2	1	0.1
cog1088 cog0751,2,1,0.1	cog1088 cog0751	2	1	0.1
cog1104 cog1396,2,1,0.1	cog1104 cog1396	2	1	0.1
cog1108 cog0626,2,1,0.1	cog1108 cog0626	2	1	0.1
cog1108 cog0661,2,1,0.1	cog1108 cog0661	2	1	0.1
cog1108 cog1312,2,1,0.1	cog1108 cog1312	2	1	0.1
cog1109 cog0577,2,1,0.1	cog1109 cog0577	2	1	0.1
cog1112 cog0221,2,1,0.1	cog1112 cog0221	2	1	0.1
cog1121 cog0656,2,1,0.1	cog1121 cog0656	2	1	0.1
cog1121 cog1125,2,1,0.1	cog1121 cog1125	2	1	0.1
cog1121 cog1539,2,1,0.1	cog1121 cog1539	2	1	0.1
cog1124 cog0760,2,1,0.1	cog1124 cog0760	2	1	0.1
cog1124 cog0818,2,1,0.1	cog1124 cog0818	2	1	0.1
cog1124 cog2382,2,1,0.1	cog1124 cog2382	2	1	0.1
cog1125 cog0760,2,1,0.1	cog1125 cog0760	2	1	0.1
cog1127 cog1079,2,1,0.1	cog1127 cog1079	2	1	0.1
cog1127 cog2854,2,1,0.1	cog1127 cog2854	2	1	0.1
cog1127 cog4121,2,1,0.1	cog1127 cog4121	2	1	0.1
cog1131 cog0789,2,1,0.1	cog1131 cog0789	2	1	0.1
cog1132 cog0596,2,1,0.1	cog1132 cog0596	2	1	0.1
cog1132 cog0751,2,1,0.1	cog1132 cog0751	2	1	0.1
cog1134 cog1131,2,1,0.1	cog1134 cog1131	2	1	0.1
cog1136 cog1131,2,1,0.1	cog1136 cog1131	2	1	0.1
cog1137 cog1131,2,1,0.1	cog1137 cog1131	2	1	0.1
cog1137 cog1496,2,1,0.1	cog1137 cog1496	2	1	0.1
cog1141 cog4720,2,1,0.1	cog1141 cog4720	2	1	0.1
cog1144 cog0147,2,1,0.1	cog1144 cog0147	2	1	0.1
cog1144 cog1014,2,1,0.1	cog1144 cog1014	2	1	0.1
cog1159 cog2274,2,1,0.1	cog1159 cog2274	2	1	0.1
cog1159 cog3326,2,1,0.1	cog1159 cog3326	2	1	0.1
cog1160 cog1063,2,1,0.1	cog1160 cog1063	2	1	0.1
cog1164 cog0564,2,1,0.1	cog1164 cog0564	2	1	0.1
cog1165 cog0553,2,1,0.1	cog1165 cog0553	2	1	0.1
cog1165 cog1434,2,1,0.1	cog1165 cog1434	2	1	0.1
cog1169 cog1426,2,1,0.1	cog1169 cog1426	2	1	0.1
cog1169 cog2315,2,1,0.1	cog1169 cog2315	2	1	0.1
cog1173 cog0826,2,1,0.1	cog1173 cog0826	2	1	0.1
cog1173 cog1896,2,1,0.1	cog1173 cog1896	2	1	0.1
cog1174 cog2755,2,1,0.1	cog1174 cog2755	2	1	0.1
cog1175 cog0461,2,1,0.1	cog1175 cog0461	2	1	0.1
cog1180 cog0183,2,1,0.1	cog1180 cog0183	2	1	0.1
cog1188 cog1080,2,1,0.1	cog1188 cog1080	2	1	0.1
cog1191 cog0760,2,1,0.1	cog1191 cog0760	2	1	0.1
cog1192 cog1312,2,1,0.1	cog1192 cog1312	2	1	0.1
cog1194 cog0358,2,1,0.1	cog1194 cog0358	2	1	0.1
cog1194 cog0628,2,1,0.1	cog1194 cog0628	2	1	0.1
cog1194 cog1164,2,1,0.1	cog1194 cog1164	2	1	0.1
cog1194 cog1314,2,1,0.1	cog1194 cog1314	2	1	0.1
cog1196 cog0513,2,1,0.1	cog1196 cog0513	2	1	0.1
cog1196 cog0541,2,1,0.1	cog1196 cog0541	2	1	0.1
cog1196 cog2905,2,1,0.1	cog1196 cog2905	2	1	0.1
cog1196 cog3819,2,1,0.1	cog1196 cog3819	2	1	0.1
cog1209 cog3935,2,1,0.1	cog1209 cog3935	2	1	0.1
cog1211 cog0328,2,1,0.1	cog1211 cog0328	2	1	0.1
cog1211 cog1136,2,1,0.1	cog1211 cog1136	2	1	0.1
cog1216 cog2216,2,1,0.1	cog1216 cog2216	2	1	0.1
cog1225 cog0327,2,1,0.1	cog1225 cog0327	2	1	0.1
cog1225 cog1695,2,1,0.1	cog1225 cog1695	2	1	0.1
cog1227 cog0441,2,1,0.1	cog1227 cog0441	2	1	0.1
cog1227 cog1802,2,1,0.1	cog1227 cog1802	2	1	0.1
cog1227 cog2755,2,1,0.1	cog1227 cog2755	2	1	0.1
cog1228 cog1173,2,1,0.1	cog1228 cog1173	2	1	0.1
cog1228 cog2846,2,1,0.1	cog1228 cog2846	2	1	0.1
cog1247 cog1954,2,1,0.1	cog1247 cog1954	2	1	0.1
cog1249 cog4948,2,1,0.1	cog1249 cog4948	2	1	0.1
cog1284 cog0541,2,1,0.1	cog1284 cog0541	2	1	0.1
cog1284 cog0568,2,1,0.1	cog1284 cog0568	2	1	0.1
cog1284 cog1137,2,1,0.1	cog1284 cog1137	2	1	0.1
cog1293 cog0328,2,1,0.1	cog1293 cog0328	2	1	0.1
cog1293 cog0655,2,1,0.1	cog1293 cog0655	2	1	0.1
cog1295 cog0625,2,1,0.1	cog1295 cog0625	2	1	0.1
cog1296 cog1194,2,1,0.1	cog1296 cog1194	2	1	0.1
cog1309 cog0634,2,1,0.1	cog1309 cog0634	2	1	0.1
cog1312 cog0141,2,1,0.1	cog1312 cog0141	2	1	0.1
cog1312 cog1853,2,1,0.1	cog1312 cog1853	2	1	0.1
cog1314 cog2384,2,1,0.1	cog1314 cog2384	2	1	0.1
cog1354 cog0727,2,1,0.1	cog1354 cog0727	2	1	0.1
cog1354 cog1132,2,1,0.1	cog1354 cog1132	2	1	0.1
cog1366 cog0079,2,1,0.1	cog1366 cog0079	2	1	0.1
cog1366 cog1897,2,1,0.1	cog1366 cog1897	2	1	0.1
cog1378 cog0747,2,1,0.1	cog1378 cog0747	2	1	0.1
cog1381 cog0319,2,1,0.1	cog1381 cog0319	2	1	0.1
cog1381 cog4392,2,1,0.1	cog1381 cog4392	2	1	0.1
cog1385 cog1420,2,1,0.1	cog1385 cog1420	2	1	0.1
cog1386 cog0232,2,1,0.1	cog1386 cog0232	2	1	0.1
cog1386 cog0544,2,1,0.1	cog1386 cog0544	2	1	0.1
cog1387 cog0591,2,1,0.1	cog1387 cog0591	2	1	0.1
cog1387 cog1386,2,1,0.1	cog1387 cog1386	2	1	0.1
cog1388 cog2220,2,1,0.1	cog1388 cog2220	2	1	0.1
cog1393 cog1671,2,1,0.1	cog1393 cog1671	2	1	0.1
cog1396 cog1387,2,1,0.1	cog1396 cog1387	2	1	0.1
cog1413 cog0673,2,1,0.1	cog1413 cog0673	2	1	0.1
cog1418 cog1225,2,1,0.1	cog1418 cog1225	2	1	0.1
cog1420 cog0319,2,1,0.1	cog1420 cog0319	2	1	0.1
cog1426 cog0351,2,1,0.1	cog1426 cog0351	2	1	0.1
cog1426 cog0612,2,1,0.1	cog1426 cog0612	2	1	0.1
cog1427 cog0612,2,1,0.1	cog1427 cog0612	2	1	0.1
cog1430 cog0177,2,1,0.1	cog1430 cog0177	2	1	0.1
cog1430 cog0346,2,1,0.1	cog1430 cog0346	2	1	0.1
cog1432 cog0799,2,1,0.1	cog1432 cog0799	2	1	0.1
cog1432 cog2010,2,1,0.1	cog1432 cog2010	2	1	0.1
cog1434 cog0553,2,1,0.1	cog1434 cog0553	2	1	0.1
cog1434 cog2010,2,1,0.1	cog1434 cog2010	2	1	0.1
cog1452 cog1934,2,1,0.1	cog1452 cog1934	2	1	0.1
cog1463 cog0461,2,1,0.1	cog1463 cog0461	2	1	0.1
cog1463 cog0699,2,1,0.1	cog1463 cog0699	2	1	0.1
cog1463 cog1127,2,1,0.1	cog1463 cog1127	2	1	0.1
cog1466 cog0295,2,1,0.1	cog1466 cog0295	2	1	0.1
cog1475 cog1284,2,1,0.1	cog1475 cog1284	2	1	0.1
cog1480 cog0136,2,1,0.1	cog1480 cog0136	2	1	0.1
cog1486 cog0395,2,1,0.1	cog1486 cog0395	2	1	0.1
cog1496 cog1692,2,1,0.1	cog1496 cog1692	2	1	0.1
cog1496 cog1934,2,1,0.1	cog1496 cog1934	2	1	0.1
cog1519 cog0564,2,1,0.1	cog1519 cog0564	2	1	0.1
cog1519 cog0752,2,1,0.1	cog1519 cog0752	2	1	0.1
cog1519 cog2195,2,1,0.1	cog1519 cog2195	2	1	0.1
cog1523 cog0271,2,1,0.1	cog1523 cog0271	2	1	0.1
cog1523 cog3707,2,1,0.1	cog1523 cog3707	2	1	0.1
cog1524 cog0484,2,1,0.1	cog1524 cog0484	2	1	0.1
cog1524 cog4948,2,1,0.1	cog1524 cog4948	2	1	0.1
cog1533 cog0645,2,1,0.1	cog1533 cog0645	2	1	0.1
cog1538 cog1432,2,1,0.1	cog1538 cog1432	2	1	0.1
cog1539 cog1124,2,1,0.1	cog1539 cog1124	2	1	0.1
cog1540 cog0266,2,1,0.1	cog1540 cog0266	2	1	0.1
cog1540 cog0406,2,1,0.1	cog1540 cog0406	2	1	0.1
cog1540 cog1579,2,1,0.1	cog1540 cog1579	2	1	0.1
cog1546 cog0563,2,1,0.1	cog1546 cog0563	2	1	0.1
cog1551 cog1947,2,1,0.1	cog1551 cog1947	2	1	0.1
cog1555 cog0558,2,1,0.1	cog1555 cog0558	2	1	0.1
cog1578 cog0210,2,1,0.1	cog1578 cog0210	2	1	0.1
cog1579 cog0245,2,1,0.1	cog1579 cog0245	2	1	0.1
cog1579 cog0266,2,1,0.1	cog1579 cog0266	2	1	0.1
cog1579 cog0406,2,1,0.1	cog1579 cog0406	2	1	0.1
cog1579 cog0526,2,1,0.1	cog1579 cog0526	2	1	0.1
cog1579 cog0568,2,1,0.1	cog1579 cog0568	2	1	0.1
cog1579 cog1144,2,1,0.1	cog1579 cog1144	2	1	0.1
cog1579 cog1519,2,1,0.1	cog1579 cog1519	2	1	0.1
cog1579 cog1897,2,1,0.1	cog1579 cog1897	2	1	0.1
cog1579 cog2049,2,1,0.1	cog1579 cog2049	2	1	0.1
cog1597 cog5002,2,1,0.1	cog1597 cog5002	2	1	0.1
cog1600 cog1378,2,1,0.1	cog1600 cog1378	2	1	0.1
cog1606 cog0601,2,1,0.1	cog1606 cog0601	2	1	0.1
cog1606 cog1194,2,1,0.1	cog1606 cog1194	2	1	0.1
cog1610 cog1546,2,1,0.1	cog1610 cog1546	2	1	0.1
cog1653 cog2971,2,1,0.1	cog1653 cog2971	2	1	0.1
cog1671 cog5124,2,1,0.1	cog1671 cog5124	2	1	0.1
cog1682 cog0271,2,1,0.1	cog1682 cog0271	2	1	0.1
cog1683 cog0335,2,1,0.1	cog1683 cog0335	2	1	0.1
cog1683 cog0826,2,1,0.1	cog1683 cog0826	2	1	0.1
cog1683 cog3817,2,1,0.1	cog1683 cog3817	2	1	0.1
cog1692 cog0221,2,1,0.1	cog1692 cog0221	2	1	0.1
cog1692 cog1452,2,1,0.1	cog1692 cog1452	2	1	0.1
cog1692 cog2264,2,1,0.1	cog1692 cog2264	2	1	0.1
cog1695 cog0596,2,1,0.1	cog1695 cog0596	2	1	0.1
cog1702 cog1385,2,1,0.1	cog1702 cog1385	2	1	0.1
cog1706 cog0751,2,1,0.1	cog1706 cog0751	2	1	0.1
cog1716 cog1413,2,1,0.1	cog1716 cog1413	2	1	0.1
cog1732 cog1426,2,1,0.1	cog1732 cog1426	2	1	0.1
cog1744 cog0115,2,1,0.1	cog1744 cog0115	2	1	0.1
cog1763 cog2206,2,1,0.1	cog1763 cog2206	2	1	0.1
cog1763 cog3113,2,1,0.1	cog1763 cog3113	2	1	0.1
cog1792 cog2352,2,1,0.1	cog1792 cog2352	2	1	0.1
cog1793 cog0583,2,1,0.1	cog1793 cog0583	2	1	0.1
cog1793 cog2216,2,1,0.1	cog1793 cog2216	2	1	0.1
cog1796 cog1228,2,1,0.1	cog1796 cog1228	2	1	0.1
cog1796 cog1480,2,1,0.1	cog1796 cog1480	2	1	0.1
cog1797 cog1284,2,1,0.1	cog1797 cog1284	2	1	0.1
cog1802 cog0597,2,1,0.1	cog1802 cog0597	2	1	0.1
cog1802 cog0747,2,1,0.1	cog1802 cog0747	2	1	0.1
cog1802 cog1028,2,1,0.1	cog1802 cog1028	2	1	0.1
cog1802 cog1610,2,1,0.1	cog1802 cog1610	2	1	0.1
cog1806 cog1088,2,1,0.1	cog1806 cog1088	2	1	0.1
cog1806 cog1227,2,1,0.1	cog1806 cog1227	2	1	0.1
cog1806 cog2010,2,1,0.1	cog1806 cog2010	2	1	0.1
cog1820 cog0840,2,1,0.1	cog1820 cog0840	2	1	0.1
cog1837 cog0335,2,1,0.1	cog1837 cog0335	2	1	0.1
cog1837 cog1121,2,1,0.1	cog1837 cog1121	2	1	0.1
cog1837 cog5007,2,1,0.1	cog1837 cog5007	2	1	0.1
cog1853 cog0525,2,1,0.1	cog1853 cog0525	2	1	0.1
cog1853 cog4912,2,1,0.1	cog1853 cog4912	2	1	0.1
cog1872 cog0739,2,1,0.1	cog1872 cog0739	2	1	0.1
cog1882 cog0655,2,1,0.1	cog1882 cog0655	2	1	0.1
cog1896 cog0217,2,1,0.1	cog1896 cog0217	2	1	0.1
cog1896 cog0789,2,1,0.1	cog1896 cog0789	2	1	0.1
cog1897 cog0457,2,1,0.1	cog1897 cog0457	2	1	0.1
cog1897 cog0513,2,1,0.1	cog1897 cog0513	2	1	0.1
cog1897 cog0826,2,1,0.1	cog1897 cog0826	2	1	0.1
cog1897 cog1671,2,1,0.1	cog1897 cog1671	2	1	0.1
cog1897 cog2873,2,1,0.1	cog1897 cog2873	2	1	0.1
cog1898 cog0564,2,1,0.1	cog1898 cog0564	2	1	0.1
cog1898 cog1209,2,1,0.1	cog1898 cog1209	2	1	0.1
cog1898 cog1579,2,1,0.1	cog1898 cog1579	2	1	0.1
cog1914 cog0468,2,1,0.1	cog1914 cog0468	2	1	0.1
cog1917 cog0845,2,1,0.1	cog1917 cog0845	2	1	0.1
cog1925 cog0240,2,1,0.1	cog1925 cog0240	2	1	0.1
cog1925 cog5124,2,1,0.1	cog1925 cog5124	2	1	0.1
cog1934 cog0766,2,1,0.1	cog1934 cog0766	2	1	0.1
cog1934 cog1523,2,1,0.1	cog1934 cog1523	2	1	0.1
cog1940 cog2319,2,1,0.1	cog1940 cog2319	2	1	0.1
cog1947 cog0691,2,1,0.1	cog1947 cog0691	2	1	0.1
cog1954 cog1228,2,1,0.1	cog1954 cog1228	2	1	0.1
cog1982 cog0452,2,1,0.1	cog1982 cog0452	2	1	0.1
cog1982 cog1597,2,1,0.1	cog1982 cog1597	2	1	0.1
cog1995 cog0491,2,1,0.1	cog1995 cog0491	2	1	0.1
cog1995 cog1127,2,1,0.1	cog1995 cog1127	2	1	0.1
cog1995 cog2857,2,1,0.1	cog1995 cog2857	2	1	0.1
cog2003 cog0513,2,1,0.1	cog2003 cog0513	2	1	0.1
cog2010 cog3133,2,1,0.1	cog2010 cog3133	2	1	0.1
cog2039 cog1088,2,1,0.1	cog2039 cog1088	2	1	0.1
cog2060 cog0327,2,1,0.1	cog2060 cog0327	2	1	0.1
cog2060 cog5610,2,1,0.1	cog2060 cog5610	2	1	0.1
cog2084 cog3103,2,1,0.1	cog2084 cog3103	2	1	0.1
cog2094 cog1173,2,1,0.1	cog2094 cog1173	2	1	0.1
cog2094 cog2211,2,1,0.1	cog2094 cog2211	2	1	0.1
cog2120 cog2304,2,1,0.1	cog2120 cog2304	2	1	0.1
cog2131 cog2270,2,1,0.1	cog2131 cog2270	2	1	0.1
cog2135 cog0392,2,1,0.1	cog2135 cog0392	2	1	0.1
cog2156 cog0210,2,1,0.1	cog2156 cog0210	2	1	0.1
cog2156 cog3380,2,1,0.1	cog2156 cog3380	2	1	0.1
cog2195 cog0568,2,1,0.1	cog2195 cog0568	2	1	0.1
cog2195 cog1209,2,1,0.1	cog2195 cog1209	2	1	0.1
cog2195 cog1898,2,1,0.1	cog2195 cog1898	2	1	0.1
cog2197 cog0548,2,1,0.1	cog2197 cog0548	2	1	0.1
cog2197 cog1188,2,1,0.1	cog2197 cog1188	2	1	0.1
cog2205 cog0582,2,1,0.1	cog2205 cog0582	2	1	0.1
cog2205 cog2156,2,1,0.1	cog2205 cog2156	2	1	0.1
cog2206 cog0603,2,1,0.1	cog2206 cog0603	2	1	0.1
cog2211 cog1087,2,1,0.1	cog2211 cog1087	2	1	0.1
cog2211 cog3937,2,1,0.1	cog2211 cog3937	2	1	0.1
cog2216 cog0040,2,1,0.1	cog2216 cog0040	2	1	0.1
cog2216 cog2205,2,1,0.1	cog2216 cog2205	2	1	0.1
cog2220 cog0009,2,1,0.1	cog2220 cog0009	2	1	0.1
cog2220 cog0457,2,1,0.1	cog2220 cog0457	2	1	0.1
cog2229 cog0477,2,1,0.1	cog2229 cog0477	2	1	0.1
cog2264 cog1418,2,1,0.1	cog2264 cog1418	2	1	0.1
cog2267 cog0327,2,1,0.1	cog2267 cog0327	2	1	0.1
cog2270 cog0173,2,1,0.1	cog2270 cog0173	2	1	0.1
cog2270 cog1247,2,1,0.1	cog2270 cog1247	2	1	0.1
cog2274 cog0344,2,1,0.1	cog2274 cog0344	2	1	0.1
cog2304 cog0436,2,1,0.1	cog2304 cog0436	2	1	0.1
cog2309 cog0147,2,1,0.1	cog2309 cog0147	2	1	0.1
cog2314 cog0225,2,1,0.1	cog2314 cog0225	2	1	0.1
cog2314 cog2966,2,1,0.1	cog2314 cog2966	2	1	0.1
cog2315 cog3481,2,1,0.1	cog2315 cog3481	2	1	0.1
cog2319 cog0730,2,1,0.1	cog2319 cog0730	2	1	0.1
cog2333 cog1051,2,1,0.1	cog2333 cog1051	2	1	0.1
cog2352 cog2893,2,1,0.1	cog2352 cog2893	2	1	0.1
cog2378 cog0145,2,1,0.1	cog2378 cog0145	2	1	0.1
cog2382 cog2211,2,1,0.1	cog2382 cog2211	2	1	0.1
cog2384 cog0327,2,1,0.1	cog2384 cog0327	2	1	0.1
cog2384 cog1381,2,1,0.1	cog2384 cog1381	2	1	0.1
cog2755 cog1121,2,1,0.1	cog2755 cog1121	2	1	0.1
cog2755 cog1434,2,1,0.1	cog2755 cog1434	2	1	0.1
cog2819 cog0531,2,1,0.1	cog2819 cog0531	2	1	0.1
cog2821 cog0327,2,1,0.1	cog2821 cog0327	2	1	0.1
cog2827 cog0327,2,1,0.1	cog2827 cog0327	2	1	0.1
cog2839 cog0147,2,1,0.1	cog2839 cog0147	2	1	0.1
cog2846 cog1896,2,1,0.1	cog2846 cog1896	2	1	0.1
cog2854 cog0228,2,1,0.1	cog2854 cog0228	2	1	0.1
cog2854 cog1463,2,1,0.1	cog2854 cog1463	2	1	0.1
cog2854 cog1837,2,1,0.1	cog2854 cog1837	2	1	0.1
cog2857 cog0477,2,1,0.1	cog2857 cog0477	2	1	0.1
cog2857 cog0531,2,1,0.1	cog2857 cog0531	2	1	0.1
cog2873 cog1578,2,1,0.1	cog2873 cog1578	2	1	0.1
cog2873 cog1995,2,1,0.1	cog2873 cog1995	2	1	0.1
cog2905 cog0240,2,1,0.1	cog2905 cog0240	2	1	0.1
cog2911 cog2819,2,1,0.1	cog2911 cog2819	2	1	0.1
cog2966 cog1523,2,1,0.1	cog2966 cog1523	2	1	0.1
cog2966 cog5646,2,1,0.1	cog2966 cog5646	2	1	0.1
cog2969 cog0745,2,1,0.1	cog2969 cog0745	2	1	0.1
cog2969 cog3039,2,1,0.1	cog2969 cog3039	2	1	0.1
cog2971 cog0520,2,1,0.1	cog2971 cog0520	2	1	0.1
cog3027 cog0157,2,1,0.1	cog3027 cog0157	2	1	0.1
cog3039 cog2197,2,1,0.1	cog3039 cog2197	2	1	0.1
cog3103 cog0728,2,1,0.1	cog3103 cog0728	2	1	0.1
cog3103 cog1180,2,1,0.1	cog3103 cog1180	2	1	0.1
cog3103 cog1606,2,1,0.1	cog3103 cog1606	2	1	0.1
cog3104 cog0008,2,1,0.1	cog3104 cog0008	2	1	0.1
cog3104 cog0330,2,1,0.1	cog3104 cog0330	2	1	0.1
cog3113 cog0745,2,1,0.1	cog3113 cog0745	2	1	0.1
cog3113 cog1080,2,1,0.1	cog3113 cog1080	2	1	0.1
cog3113 cog1387,2,1,0.1	cog3113 cog1387	2	1	0.1
cog3133 cog0236,2,1,0.1	cog3133 cog0236	2	1	0.1
cog3133 cog0500,2,1,0.1	cog3133 cog0500	2	1	0.1
cog3133 cog3113,2,1,0.1	cog3133 cog3113	2	1	0.1
cog3200 cog1538,2,1,0.1	cog3200 cog1538	2	1	0.1
cog3217 cog4826,2,1,0.1	cog3217 cog4826	2	1	0.1
cog3228 cog2120,2,1,0.1	cog3228 cog2120	2	1	0.1
cog3246 cog1940,2,1,0.1	cog3246 cog1940	2	1	0.1
cog3272 cog1897,2,1,0.1	cog3272 cog1897	2	1	0.1
cog3323 cog3217,2,1,0.1	cog3323 cog3217	2	1	0.1
cog3326 cog0735,2,1,0.1	cog3326 cog0735	2	1	0.1
cog3326 cog1381,2,1,0.1	cog3326 cog1381	2	1	0.1
cog3380 cog0033,2,1,0.1	cog3380 cog0033	2	1	0.1
cog3387 cog0444,2,1,0.1	cog3387 cog0444	2	1	0.1
cog3425 cog1914,2,1,0.1	cog3425 cog1914	2	1	0.1
cog3429 cog0363,2,1,0.1	cog3429 cog0363	2	1	0.1
cog3467 cog0685,2,1,0.1	cog3467 cog0685	2	1	0.1
cog3467 cog1309,2,1,0.1	cog3467 cog1309	2	1	0.1
cog3481 cog0351,2,1,0.1	cog3481 cog0351	2	1	0.1
cog3481 cog1797,2,1,0.1	cog3481 cog1797	2	1	0.1
cog3631 cog0225,2,1,0.1	cog3631 cog0225	2	1	0.1
cog3655 cog0451,2,1,0.1	cog3655 cog0451	2	1	0.1
cog3696 cog1057,2,1,0.1	cog3696 cog1057	2	1	0.1
cog3707 cog4118,2,1,0.1	cog3707 cog4118	2	1	0.1
cog3708 cog1551,2,1,0.1	cog3708 cog1551	2	1	0.1
cog3725 cog1524,2,1,0.1	cog3725 cog1524	2	1	0.1
cog3744 cog0110,2,1,0.1	cog3744 cog0110	2	1	0.1
cog3744 cog2966,2,1,0.1	cog3744 cog2966	2	1	0.1
cog3817 cog0041,2,1,0.1	cog3817 cog0041	2	1	0.1
cog3819 cog0500,2,1,0.1	cog3819 cog0500	2	1	0.1
cog3819 cog0682,2,1,0.1	cog3819 cog0682	2	1	0.1
cog3819 cog1127,2,1,0.1	cog3819 cog1127	2	1	0.1
cog3823 cog0769,2,1,0.1	cog3823 cog0769	2	1	0.1
cog3842 cog0739,2,1,0.1	cog3842 cog0739	2	1	0.1
cog3845 cog1463,2,1,0.1	cog3845 cog1463	2	1	0.1
cog3859 cog3425,2,1,0.1	cog3859 cog3425	2	1	0.1
cog3935 cog0423,2,1,0.1	cog3935 cog0423	2	1	0.1
cog3935 cog1088,2,1,0.1	cog3935 cog1088	2	1	0.1
cog3935 cog1209,2,1,0.1	cog3935 cog1209	2	1	0.1
cog3937 cog0328,2,1,0.1	cog3937 cog0328	2	1	0.1
cog3937 cog0821,2,1,0.1	cog3937 cog0821	2	1	0.1
cog4118 cog0452,2,1,0.1	cog4118 cog0452	2	1	0.1
cog4118 cog2314,2,1,0.1	cog4118 cog2314	2	1	0.1
cog4121 cog5007,2,1,0.1	cog4121 cog5007	2	1	0.1
cog4347 cog0116,2,1,0.1	cog4347 cog0116	2	1	0.1
cog4347 cog4550,2,1,0.1	cog4347 cog4550	2	1	0.1
cog4392 cog1121,2,1,0.1	cog4392 cog1121	2	1	0.1
cog4508 cog0225,2,1,0.1	cog4508 cog0225	2	1	0.1
cog4508 cog2854,2,1,0.1	cog4508 cog2854	2	1	0.1
cog4542 cog0352,2,1,0.1	cog4542 cog0352	2	1	0.1
cog4550 cog0116,2,1,0.1	cog4550 cog0116	2	1	0.1
cog4603 cog0125,2,1,0.1	cog4603 cog0125	2	1	0.1
cog4608 cog1533,2,1,0.1	cog4608 cog1533	2	1	0.1
cog4720 cog0477,2,1,0.1	cog4720 cog0477	2	1	0.1
cog4720 cog0531,2,1,0.1	cog4720 cog0531	2	1	0.1
cog4767 cog1011,2,1,0.1	cog4767 cog1011	2	1	0.1
cog4826 cog1175,2,1,0.1	cog4826 cog1175	2	1	0.1
cog4912 cog0527,2,1,0.1	cog4912 cog0527	2	1	0.1
cog4912 cog3326,2,1,0.1	cog4912 cog3326	2	1	0.1
cog4932 cog0747,2,1,0.1	cog4932 cog0747	2	1	0.1
cog4948 cog0481,2,1,0.1	cog4948 cog0481	2	1	0.1
cog4948 cog2333,2,1,0.1	cog4948 cog2333	2	1	0.1
cog5002 cog0210,2,1,0.1	cog5002 cog0210	2	1	0.1
cog5007 cog0500,2,1,0.1	cog5007 cog0500	2	1	0.1
cog5007 cog3133,2,1,0.1	cog5007 cog3133	2	1	0.1
cog5124 cog0141,2,1,0.1	cog5124 cog0141	2	1	0.1
cog5124 cog0324,2,1,0.1	cog5124 cog0324	2	1	0.1
cog5212 cog0695,2,1,0.1	cog5212 cog0695	2	1	0.1
cog5212 cog0767,2,1,0.1	cog5212 cog0767	2	1	0.1
cog5610 cog1982,2,1,0.1	cog5610 cog1982	2	1	0.1
cog5646 cog0603,2,1,0.1	cog5646 cog0603	2	1	0.1
cog2049 cog1984 cog1540,3,3,0.3	cog2049 cog1984 cog1540	3	3	0.3
cog0010 cog1899 cog0231,3,2,0.2	cog0010 cog1899 cog0231	3	2	0.2
cog0013 cog0640 cog1833,3,2,0.2	cog0013 cog0640 cog1833	3	2	0.2
cog0024 cog1672 cog4074,3,2,0.2	cog0024 cog1672 cog4074	3	2	0.2
cog0076 cog4055 cog4054,3,2,0.2	cog0076 cog4055 cog4054	3	2	0.2
cog0226 cog4063 cog4064,3,2,0.2	cog0226 cog4063 cog4064	3	2	0.2
cog0231 cog5542 cog0671,3,2,0.2	cog0231 cog5542 cog0671	3	2	0.2
cog0311 cog1117 cog4218,3,2,0.2	cog0311 cog1117 cog4218	3	2	0.2
cog0327 cog2049 cog1984,3,2,0.2	cog0327 cog2049 cog1984	3	2	0.2
cog0327 cog2384 cog0665,3,2,0.2	cog0327 cog2384 cog0665	3	2	0.2
cog0327 cog2384 cog1579,3,2,0.2	cog0327 cog2384 cog1579	3	2	0.2
cog0327 cog2890 cog5431,3,2,0.2	cog0327 cog2890 cog5431	3	2	0.2
cog0343 cog2896 cog0622,3,2,0.2	cog0343 cog2896 cog0622	3	2	0.2
cog0388 cog0639 cog1423,3,2,0.2	cog0388 cog0639 cog1423	3	2	0.2
cog0396 cog0697 cog2266,3,2,0.2	cog0396 cog0697 cog2266	3	2	0.2
cog0415 cog3272 cog2039,3,2,0.2	cog0415 cog3272 cog2039	3	2	0.2
cog0500 cog0076 cog4055,3,2,0.2	cog0500 cog0076 cog4055	3	2	0.2
cog0502 cog4016 cog4019,3,2,0.2	cog0502 cog4016 cog4019	3	2	0.2
cog0573 cog4060 cog4061,3,2,0.2	cog0573 cog4060 cog4061	3	2	0.2
cog0581 cog1970 cog1348,3,2,0.2	cog0581 cog1970 cog1348	3	2	0.2
cog0589 cog4056 cog0615,3,2,0.2	cog0589 cog4056 cog0615	3	2	0.2
cog0615 cog4059 cog4058,3,2,0.2	cog0615 cog4059 cog4058	3	2	0.2
cog0622 cog0628 cog1962,3,2,0.2	cog0622 cog0628 cog1962	3	2	0.2
cog0628 cog1962 cog0834,3,2,0.2	cog0628 cog1962 cog0834	3	2	0.2
cog0639 cog1423 cog1509,3,2,0.2	cog0639 cog1423 cog1509	3	2	0.2
cog0640 cog1833 cog4018,3,2,0.2	cog0640 cog1833 cog4018	3	2	0.2
cog0655 cog4085 cog0500,3,2,0.2	cog0655 cog4085 cog0500	3	2	0.2
cog0671 cog0655 cog4085,3,2,0.2	cog0671 cog0655 cog4085	3	2	0.2
cog0697 cog2266 cog1697,3,2,0.2	cog0697 cog2266 cog1697	3	2	0.2
cog0719 cog0311 cog1117,3,2,0.2	cog0719 cog0311 cog1117	3	2	0.2
cog0834 cog0226 cog4063,3,2,0.2	cog0834 cog0226 cog4063	3	2	0.2
cog1087 cog0639 cog4347,3,2,0.2	cog1087 cog0639 cog4347	3	2	0.2
cog1117 cog4218 cog4057,3,2,0.2	cog1117 cog4218 cog4057	3	2	0.2
cog1348 cog0343 cog2896,3,2,0.2	cog1348 cog0343 cog2896	3	2	0.2
cog1423 cog1509 cog0396,3,2,0.2	cog1423 cog1509 cog0396	3	2	0.2
cog1509 cog0396 cog0697,3,2,0.2	cog1509 cog0396 cog0697	3	2	0.2
cog1672 cog4074 cog0010,3,2,0.2	cog1672 cog4074 cog0010	3	2	0.2
cog1697 cog0704 cog0327,3,2,0.2	cog1697 cog0704 cog0327	3	2	0.2
cog1833 cog4018 cog0024,3,2,0.2	cog1833 cog4018 cog0024	3	2	0.2
cog1873 cog0581 cog1970,3,2,0.2	cog1873 cog0581 cog1970	3	2	0.2
cog1899 cog0231 cog5542,3,2,0.2	cog1899 cog0231 cog5542	3	2	0.2
cog1962 cog0834 cog0226,3,2,0.2	cog1962 cog0834 cog0226	3	2	0.2
cog1970 cog1348 cog0343,3,2,0.2	cog1970 cog1348 cog0343	3	2	0.2
cog2016 cog0502 cog4016,3,2,0.2	cog2016 cog0502 cog4016	3	2	0.2
cog2266 cog1697 cog0704,3,2,0.2	cog2266 cog1697 cog0704	3	2	0.2
cog2384 cog0665 cog2195,3,2,0.2	cog2384 cog0665 cog2195	3	2	0.2
cog2890 cog5431 cog4017,3,2,0.2	cog2890 cog5431 cog4017	3	2	0.2
cog2896 cog0622 cog0628,3,2,0.2	cog2896 cog0622 cog0628	3	2	0.2
cog2957 cog4062 cog0388,3,2,0.2	cog2957 cog4062 cog0388	3	2	0.2
cog3272 cog2039 cog1683,3,2,0.2	cog3272 cog2039 cog1683	3	2	0.2
cog4015 cog0013 cog0640,3,2,0.2	cog4015 cog0013 cog0640	3	2	0.2
cog4016 cog4019 cog4015,3,2,0.2	cog4016 cog4019 cog4015	3	2	0.2
cog4017 cog2016 cog0502,3,2,0.2	cog4017 cog2016 cog0502	3	2	0.2
cog4018 cog0024 cog1672,3,2,0.2	cog4018 cog0024 cog1672	3	2	0.2
cog4019 cog4015 cog0013,3,2,0.2	cog4019 cog4015 cog0013	3	2	0.2
cog4054 cog0719 cog0311,3,2,0.2	cog4054 cog0719 cog0311	3	2	0.2
cog4055 cog4054 cog0719,3,2,0.2	cog4055 cog4054 cog0719	3	2	0.2
cog4056 cog0615 cog4059,3,2,0.2	cog4056 cog0615 cog4059	3	2	0.2
cog4057 cog0589 cog4056,3,2,0.2	cog4057 cog0589 cog4056	3	2	0.2
cog4058 cog1873 cog0581,3,2,0.2	cog4058 cog1873 cog0581	3	2	0.2
cog4059 cog4058 cog1873,3,2,0.2	cog4059 cog4058 cog1873	3	2	0.2
cog4060 cog4061 cog2957,3,2,0.2	cog4060 cog4061 cog2957	3	2	0.2
cog4061 cog2957 cog4062,3,2,0.2	cog4061 cog2957 cog4062	3	2	0.2
cog4062 cog0388 cog0639,3,2,0.2	cog4062 cog0388 cog0639	3	2	0.2
cog4063 cog4064 cog4065,3,2,0.2	cog4063 cog4064 cog4065	3	2	0.2
cog4064 cog4065 cog0573,3,2,0.2	cog4064 cog4065 cog0573	3	2	0.2
cog4065 cog0573 cog4060,3,2,0.2	cog4065 cog0573 cog4060	3	2	0.2
cog4074 cog0010 cog1899,3,2,0.2	cog4074 cog0010 cog1899	3	2	0.2
cog4085 cog0500 cog0076,3,2,0.2	cog4085 cog0500 cog0076	3	2	0.2
cog4218 cog4057 cog0589,3,2,0.2	cog4218 cog4057 cog0589	3	2	0.2
cog5431 cog4017 cog2016,3,2,0.2	cog5431 cog4017 cog2016	3	2	0.2
cog5542 cog0671 cog0655,3,2,0.2	cog5542 cog0671 cog0655	3	2	0.2
cog0008 cog0457 cog0215,3,1,0.1	cog0008 cog0457 cog0215	3	1	0.1
cog0008 cog2893 cog1925,3,1,0.1	cog0008 cog2893 cog1925	3	1	0.1
cog0009 cog0735 cog0727,3,1,0.1	cog0009 cog0735 cog0727	3	1	0.1
cog0009 cog0767 cog1108,3,1,0.1	cog0009 cog0767 cog1108	3	1	0.1
cog0016 cog0177 cog0152,3,1,0.1	cog0016 cog0177 cog0152	3	1	0.1
cog0033 cog0582 cog3104,3,1,0.1	cog0033 cog0582 cog3104	3	1	0.1
cog0036 cog1104 cog1396,3,1,0.1	cog0036 cog1104 cog1396	3	1	0.1
cog0037 cog0016 cog0177,3,1,0.1	cog0037 cog0016 cog0177	3	1	0.1
cog0040 cog1028 cog0695,3,1,0.1	cog0040 cog1028 cog0695	3	1	0.1
cog0040 cog2060 cog5610,3,1,0.1	cog0040 cog2060 cog5610	3	1	0.1
cog0040 cog5212 cog0695,3,1,0.1	cog0040 cog5212 cog0695	3	1	0.1
cog0041 cog0494 cog1430,3,1,0.1	cog0041 cog0494 cog1430	3	1	0.1
cog0041 cog1196 cog0541,3,1,0.1	cog0041 cog1196 cog0541	3	1	0.1
cog0041 cog1196 cog3819,3,1,0.1	cog0041 cog1196 cog3819	3	1	0.1
cog0052 cog1386 cog0544,3,1,0.1	cog0052 cog1386 cog0544	3	1	0.1
cog0052 cog1806 cog1227,3,1,0.1	cog0052 cog1806 cog1227	3	1	0.1
cog0075 cog1427 cog0612,3,1,0.1	cog0075 cog1427 cog0612	3	1	0.1
cog0079 cog0406 cog0327,3,1,0.1	cog0079 cog0406 cog0327	3	1	0.1
cog0079 cog0494 cog0749,3,1,0.1	cog0079 cog0494 cog0749	3	1	0.1
cog0079 cog0583 cog0271,3,1,0.1	cog0079 cog0583 cog0271	3	1	0.1
cog0079 cog0617 cog1682,3,1,0.1	cog0079 cog0617 cog1682	3	1	0.1
cog0079 cog3935 cog0423,3,1,0.1	cog0079 cog3935 cog0423	3	1	0.1
cog0102 cog0103 cog0491,3,1,0.1	cog0102 cog0103 cog0491	3	1	0.1
cog0102 cog0103 cog1982,3,1,0.1	cog0102 cog0103 cog1982	3	1	0.1
cog0103 cog0491 cog0179,3,1,0.1	cog0103 cog0491 cog0179	3	1	0.1
cog0103 cog1982 cog0452,3,1,0.1	cog0103 cog1982 cog0452	3	1	0.1
cog0110 cog0079 cog0406,3,1,0.1	cog0110 cog0079 cog0406	3	1	0.1
cog0110 cog0766 cog4603,3,1,0.1	cog0110 cog0766 cog4603	3	1	0.1
cog0115 cog0544 cog0352,3,1,0.1	cog0115 cog0544 cog0352	3	1	0.1
cog0115 cog2309 cog0147,3,1,0.1	cog0115 cog2309 cog0147	3	1	0.1
cog0116 cog0635 cog1306,3,1,0.1	cog0116 cog0635 cog1306	3	1	0.1
cog0116 cog1306 cog1796,3,1,0.1	cog0116 cog1306 cog1796	3	1	0.1
cog0125 cog0735 cog1132,3,1,0.1	cog0125 cog0735 cog1132	3	1	0.1
cog0125 cog1430 cog0346,3,1,0.1	cog0125 cog1430 cog0346	3	1	0.1
cog0130 cog3708 cog1551,3,1,0.1	cog0130 cog3708 cog1551	3	1	0.1
cog0136 cog1466 cog0295,3,1,0.1	cog0136 cog1466 cog0295	3	1	0.1
cog0141 cog0477 cog3113,3,1,0.1	cog0141 cog0477 cog3113	3	1	0.1
cog0141 cog1144 cog0147,3,1,0.1	cog0141 cog1144 cog0147	3	1	0.1
cog0141 cog2911 cog2819,3,1,0.1	cog0141 cog2911 cog2819	3	1	0.1
cog0145 cog1028 cog0620,3,1,0.1	cog0145 cog1028 cog0620	3	1	0.1
cog0146 cog2229 cog0477,3,1,0.1	cog0146 cog2229 cog0477	3	1	0.1
cog0147 cog0525 cog3842,3,1,0.1	cog0147 cog0525 cog3842	3	1	0.1
cog0147 cog1475 cog1284,3,1,0.1	cog0147 cog1475 cog1284	3	1	0.1
cog0147 cog1716 cog1413,3,1,0.1	cog0147 cog1716 cog1413	3	1	0.1
cog0152 cog0178 cog1131,3,1,0.1	cog0152 cog0178 cog1131	3	1	0.1
cog0157 cog1792 cog2352,3,1,0.1	cog0157 cog1792 cog2352	3	1	0.1
cog0162 cog0264 cog0052,3,1,0.1	cog0162 cog0264 cog0052	3	1	0.1
cog0173 cog2314 cog0225,3,1,0.1	cog0173 cog2314 cog0225	3	1	0.1
cog0177 cog0152 cog0178,3,1,0.1	cog0177 cog0152 cog0178	3	1	0.1
cog0177 cog0568 cog1897,3,1,0.1	cog0177 cog0568 cog1897	3	1	0.1
cog0177 cog0761 cog1227,3,1,0.1	cog0177 cog0761 cog1227	3	1	0.1
cog0177 cog1196 cog0513,3,1,0.1	cog0177 cog1196 cog0513	3	1	0.1
cog0178 cog1131 cog0789,3,1,0.1	cog0178 cog1131 cog0789	3	1	0.1
cog0179 cog1322 cog1793,3,1,0.1	cog0179 cog1322 cog1793	3	1	0.1
cog0183 cog0576 cog2131,3,1,0.1	cog0183 cog0576 cog2131	3	1	0.1
cog0205 cog2270 cog0173,3,1,0.1	cog0205 cog2270 cog0173	3	1	0.1
cog0206 cog1112 cog0221,3,1,0.1	cog0206 cog1112 cog0221	3	1	0.1
cog0210 cog0236 cog1872,3,1,0.1	cog0210 cog0236 cog1872	3	1	0.1
cog0210 cog0756 cog0079,3,1,0.1	cog0210 cog0756 cog0079	3	1	0.1
cog0210 cog1366 cog0079,3,1,0.1	cog0210 cog1366 cog0079	3	1	0.1
cog0215 cog0327 cog1579,3,1,0.1	cog0215 cog0327 cog1579	3	1	0.1
cog0215 cog2969 cog0745,3,1,0.1	cog0215 cog2969 cog0745	3	1	0.1
cog0217 cog1011 cog3103,3,1,0.1	cog0217 cog1011 cog3103	3	1	0.1
cog0217 cog4118 cog2314,3,1,0.1	cog0217 cog4118 cog2314	3	1	0.1
cog0221 cog0607 cog1837,3,1,0.1	cog0221 cog0607 cog1837	3	1	0.1
cog0221 cog0693 cog0327,3,1,0.1	cog0221 cog0693 cog0327	3	1	0.1
cog0225 cog0206 cog1112,3,1,0.1	cog0225 cog0206 cog1112	3	1	0.1
cog0225 cog1060 cog1023,3,1,0.1	cog0225 cog1060 cog1023	3	1	0.1
cog0225 cog2839 cog0147,3,1,0.1	cog0225 cog2839 cog0147	3	1	0.1
cog0228 cog0806 cog1463,3,1,0.1	cog0228 cog0806 cog1463	3	1	0.1
cog0228 cog1763 cog3113,3,1,0.1	cog0228 cog1763 cog3113	3	1	0.1
cog0228 cog1837 cog0335,3,1,0.1	cog0228 cog1837 cog0335	3	1	0.1
cog0232 cog0801 cog0217,3,1,0.1	cog0232 cog0801 cog0217	3	1	0.1
cog0232 cog1293 cog0328,3,1,0.1	cog0232 cog1293 cog0328	3	1	0.1
cog0232 cog3937 cog0328,3,1,0.1	cog0232 cog3937 cog0328	3	1	0.1
cog0236 cog1295 cog0625,3,1,0.1	cog0236 cog1295 cog0625	3	1	0.1
cog0236 cog1872 cog0739,3,1,0.1	cog0236 cog1872 cog0739	3	1	0.1
cog0240 cog0720 cog0626,3,1,0.1	cog0240 cog0720 cog0626	3	1	0.1
cog0240 cog0778 cog0682,3,1,0.1	cog0240 cog0778 cog0682	3	1	0.1
cog0240 cog0778 cog0826,3,1,0.1	cog0240 cog0778 cog0826	3	1	0.1
cog0240 cog2821 cog0327,3,1,0.1	cog0240 cog2821 cog0327	3	1	0.1
cog0240 cog3272 cog1897,3,1,0.1	cog0240 cog3272 cog1897	3	1	0.1
cog0245 cog1211 cog0328,3,1,0.1	cog0245 cog1211 cog0328	3	1	0.1
cog0245 cog1290 cog0723,3,1,0.1	cog0245 cog1290 cog0723	3	1	0.1
cog0249 cog3655 cog0451,3,1,0.1	cog0249 cog3655 cog0451	3	1	0.1
cog0258 cog3744 cog0110,3,1,0.1	cog0258 cog3744 cog0110	3	1	0.1
cog0258 cog3744 cog2966,3,1,0.1	cog0258 cog3744 cog2966	3	1	0.1
cog0264 cog0052 cog1386,3,1,0.1	cog0264 cog0052 cog1386	3	1	0.1
cog0264 cog0258 cog3744,3,1,0.1	cog0264 cog0258 cog3744	3	1	0.1
cog0266 cog0415 cog3272,3,1,0.1	cog0266 cog0415 cog3272	3	1	0.1
cog0266 cog1194 cog0358,3,1,0.1	cog0266 cog1194 cog0358	3	1	0.1
cog0266 cog1519 cog0564,3,1,0.1	cog0266 cog1519 cog0564	3	1	0.1
cog0268 cog2094 cog2211,3,1,0.1	cog0268 cog2094 cog2211	3	1	0.1
cog0271 cog1014 cog1013,3,1,0.1	cog0271 cog1014 cog1013	3	1	0.1
cog0271 cog1052 cog3104,3,1,0.1	cog0271 cog1052 cog3104	3	1	0.1
cog0271 cog2084 cog3103,3,1,0.1	cog0271 cog2084 cog3103	3	1	0.1
cog0272 cog0481 cog1853,3,1,0.1	cog0272 cog0481 cog1853	3	1	0.1
cog0272 cog0572 cog0232,3,1,0.1	cog0272 cog0572 cog0232	3	1	0.1
cog0295 cog4932 cog0747,3,1,0.1	cog0295 cog4932 cog0747	3	1	0.1
cog0319 cog1159 cog2274,3,1,0.1	cog0319 cog1159 cog2274	3	1	0.1
cog0319 cog1882 cog0655,3,1,0.1	cog0319 cog1882 cog0655	3	1	0.1
cog0323 cog0327 cog2384,3,1,0.1	cog0323 cog0327 cog2384	3	1	0.1
cog0324 cog1917 cog0845,3,1,0.1	cog0324 cog1917 cog0845	3	1	0.1
cog0327 cog0115 cog2309,3,1,0.1	cog0327 cog0115 cog2309	3	1	0.1
cog0327 cog0125 cog1430,3,1,0.1	cog0327 cog0125 cog1430	3	1	0.1
cog0327 cog0327 cog2890,3,1,0.1	cog0327 cog0327 cog2890	3	1	0.1
cog0327 cog0568 cog0358,3,1,0.1	cog0327 cog0568 cog0358	3	1	0.1
cog0327 cog0568 cog1191,3,1,0.1	cog0327 cog0568 cog1191	3	1	0.1
cog0327 cog0597 cog1137,3,1,0.1	cog0327 cog0597 cog1137	3	1	0.1
cog0327 cog1194 cog1164,3,1,0.1	cog0327 cog1194 cog1164	3	1	0.1
cog0327 cog1579 cog0245,3,1,0.1	cog0327 cog1579 cog0245	3	1	0.1
cog0327 cog1579 cog0406,3,1,0.1	cog0327 cog1579 cog0406	3	1	0.1
cog0327 cog1579 cog0526,3,1,0.1	cog0327 cog1579 cog0526	3	1	0.1
cog0327 cog1579 cog1144,3,1,0.1	cog0327 cog1579 cog1144	3	1	0.1
cog0327 cog1579 cog1519,3,1,0.1	cog0327 cog1579 cog1519	3	1	0.1
cog0327 cog1995 cog2857,3,1,0.1	cog0327 cog1995 cog2857	3	1	0.1
cog0327 cog3481 cog1797,3,1,0.1	cog0327 cog3481 cog1797	3	1	0.1
cog0328 cog0008 cog0457,3,1,0.1	cog0328 cog0008 cog0457	3	1	0.1
cog0328 cog0079 cog0494,3,1,0.1	cog0328 cog0079 cog0494	3	1	0.1
cog0328 cog0665 cog0568,3,1,0.1	cog0328 cog0665 cog0568	3	1	0.1
cog0328 cog1174 cog2755,3,1,0.1	cog0328 cog1174 cog2755	3	1	0.1
cog0328 cog1293 cog0655,3,1,0.1	cog0328 cog1293 cog0655	3	1	0.1
cog0329 cog4720 cog0477,3,1,0.1	cog0329 cog4720 cog0477	3	1	0.1
cog0330 cog1216 cog2216,3,1,0.1	cog0330 cog1216 cog2216	3	1	0.1
cog0335 cog0336 cog0767,3,1,0.1	cog0335 cog0336 cog0767	3	1	0.1
cog0335 cog0336 cog0806,3,1,0.1	cog0335 cog0336 cog0806	3	1	0.1
cog0335 cog1671 cog0428,3,1,0.1	cog0335 cog1671 cog0428	3	1	0.1
cog0336 cog0767 cog0766,3,1,0.1	cog0336 cog0767 cog0766	3	1	0.1
cog0336 cog0806 cog0699,3,1,0.1	cog0336 cog0806 cog0699	3	1	0.1
cog0336 cog1354 cog0727,3,1,0.1	cog0336 cog1354 cog0727	3	1	0.1
cog0344 cog0694 cog0648,3,1,0.1	cog0344 cog0694 cog0648	3	1	0.1
cog0344 cog1196 cog2905,3,1,0.1	cog0344 cog1196 cog2905	3	1	0.1
cog0346 cog3246 cog1940,3,1,0.1	cog0346 cog3246 cog1940	3	1	0.1
cog0346 cog3823 cog0769,3,1,0.1	cog0346 cog3823 cog0769	3	1	0.1
cog0351 cog0336 cog1354,3,1,0.1	cog0351 cog0336 cog1354	3	1	0.1
cog0351 cog1058 cog0443,3,1,0.1	cog0351 cog1058 cog0443	3	1	0.1
cog0351 cog3725 cog1524,3,1,0.1	cog0351 cog3725 cog1524	3	1	0.1
cog0352 cog0110 cog0079,3,1,0.1	cog0352 cog0110 cog0079	3	1	0.1
cog0352 cog0351 cog0336,3,1,0.1	cog0352 cog0351 cog0336	3	1	0.1
cog0358 cog0327 cog0115,3,1,0.1	cog0358 cog0327 cog0115	3	1	0.1
cog0358 cog0423 cog2384,3,1,0.1	cog0358 cog0423 cog2384	3	1	0.1
cog0358 cog0648 cog0542,3,1,0.1	cog0358 cog0648 cog0542	3	1	0.1
cog0358 cog0661 cog0441,3,1,0.1	cog0358 cog0661 cog0441	3	1	0.1
cog0358 cog0752 cog1519,3,1,0.1	cog0358 cog0752 cog1519	3	1	0.1
cog0358 cog3935 cog1209,3,1,0.1	cog0358 cog3935 cog1209	3	1	0.1
cog0363 cog1600 cog1378,3,1,0.1	cog0363 cog1600 cog1378	3	1	0.1
cog0364 cog1028 cog4608,3,1,0.1	cog0364 cog1028 cog4608	3	1	0.1
cog0390 cog0327 cog1194,3,1,0.1	cog0390 cog0327 cog1194	3	1	0.1
cog0392 cog0438 cog1820,3,1,0.1	cog0392 cog0438 cog1820	3	1	0.1
cog0395 cog0557 cog1653,3,1,0.1	cog0395 cog0557 cog1653	3	1	0.1
cog0406 cog0327 cog0568,3,1,0.1	cog0406 cog0327 cog0568	3	1	0.1
cog0406 cog0328 cog0079,3,1,0.1	cog0406 cog0328 cog0079	3	1	0.1
cog0406 cog0328 cog0665,3,1,0.1	cog0406 cog0328 cog0665	3	1	0.1
cog0415 cog0240 cog3272,3,1,0.1	cog0415 cog0240 cog3272	3	1	0.1
cog0423 cog0415 cog0240,3,1,0.1	cog0423 cog0415 cog0240	3	1	0.1
cog0423 cog2384 cog1381,3,1,0.1	cog0423 cog2384 cog1381	3	1	0.1
cog0426 cog0327 cog0568,3,1,0.1	cog0426 cog0327 cog0568	3	1	0.1
cog0428 cog0052 cog1806,3,1,0.1	cog0428 cog0052 cog1806	3	1	0.1
cog0428 cog0513 cog0648,3,1,0.1	cog0428 cog0513 cog0648	3	1	0.1
cog0428 cog1806 cog2010,3,1,0.1	cog0428 cog1806 cog2010	3	1	0.1
cog0436 cog0390 cog0327,3,1,0.1	cog0436 cog0390 cog0327	3	1	0.1
cog0438 cog0141 cog2911,3,1,0.1	cog0438 cog0141 cog2911	3	1	0.1
cog0438 cog1820 cog0840,3,1,0.1	cog0438 cog1820 cog0840	3	1	0.1
cog0441 cog0272 cog0572,3,1,0.1	cog0441 cog0272 cog0572	3	1	0.1
cog0441 cog0542 cog0572,3,1,0.1	cog0441 cog0542 cog0572	3	1	0.1
cog0443 cog1249 cog4948,3,1,0.1	cog0443 cog1249 cog4948	3	1	0.1
cog0444 cog3429 cog0363,3,1,0.1	cog0444 cog3429 cog0363	3	1	0.1
cog0451 cog0658 cog0454,3,1,0.1	cog0451 cog0658 cog0454	3	1	0.1
cog0452 cog0036 cog1104,3,1,0.1	cog0452 cog0036 cog1104	3	1	0.1
cog0452 cog2197 cog0548,3,1,0.1	cog0452 cog2197 cog0548	3	1	0.1
cog0454 cog1124 cog2382,3,1,0.1	cog0454 cog1124 cog2382	3	1	0.1
cog0454 cog1165 cog0553,3,1,0.1	cog0454 cog1165 cog0553	3	1	0.1
cog0457 cog0215 cog0327,3,1,0.1	cog0457 cog0215 cog0327	3	1	0.1
cog0457 cog0323 cog0327,3,1,0.1	cog0457 cog0323 cog0327	3	1	0.1
cog0457 cog0596 cog0205,3,1,0.1	cog0457 cog0596 cog0205	3	1	0.1
cog0457 cog1225 cog0327,3,1,0.1	cog0457 cog1225 cog0327	3	1	0.1
cog0457 cog1995 cog1127,3,1,0.1	cog0457 cog1995 cog1127	3	1	0.1
cog0457 cog2873 cog1578,3,1,0.1	cog0457 cog2873 cog1578	3	1	0.1
cog0461 cog1486 cog0395,3,1,0.1	cog0461 cog1486 cog0395	3	1	0.1
cog0461 cog2220 cog0457,3,1,0.1	cog0461 cog2220 cog0457	3	1	0.1
cog0463 cog0515 cog0517,3,1,0.1	cog0463 cog0515 cog0517	3	1	0.1
cog0463 cog0562 cog0605,3,1,0.1	cog0463 cog0562 cog0605	3	1	0.1
cog0466 cog1354 cog1132,3,1,0.1	cog0466 cog1354 cog1132	3	1	0.1
cog0466 cog3845 cog1463,3,1,0.1	cog0466 cog3845 cog1463	3	1	0.1
cog0468 cog0531 cog1087,3,1,0.1	cog0468 cog0531 cog1087	3	1	0.1
cog0477 cog0625 cog1290,3,1,0.1	cog0477 cog0625 cog1290	3	1	0.1
cog0477 cog3113 cog1080,3,1,0.1	cog0477 cog3113 cog1080	3	1	0.1
cog0477 cog3323 cog3217,3,1,0.1	cog0477 cog3323 cog3217	3	1	0.1
cog0477 cog3859 cog3425,3,1,0.1	cog0477 cog3859 cog3425	3	1	0.1
cog0481 cog1141 cog4720,3,1,0.1	cog0481 cog1141 cog4720	3	1	0.1
cog0481 cog1853 cog0525,3,1,0.1	cog0481 cog1853 cog0525	3	1	0.1
cog0484 cog0272 cog0481,3,1,0.1	cog0484 cog0272 cog0481	3	1	0.1
cog0488 cog4767 cog1011,3,1,0.1	cog0488 cog4767 cog1011	3	1	0.1
cog0491 cog0179 cog1322,3,1,0.1	cog0491 cog0179 cog1322	3	1	0.1
cog0491 cog3133 cog0236,3,1,0.1	cog0491 cog3133 cog0236	3	1	0.1
cog0494 cog0268 cog2094,3,1,0.1	cog0494 cog0268 cog2094	3	1	0.1
cog0494 cog0749 cog0258,3,1,0.1	cog0494 cog0749 cog0258	3	1	0.1
cog0494 cog1108 cog1312,3,1,0.1	cog0494 cog1108 cog1312	3	1	0.1
cog0494 cog1430 cog0177,3,1,0.1	cog0494 cog1430 cog0177	3	1	0.1
cog0500 cog0541 cog0335,3,1,0.1	cog0500 cog0541 cog0335	3	1	0.1
cog0500 cog1496 cog1934,3,1,0.1	cog0500 cog1496 cog1934	3	1	0.1
cog0500 cog5212 cog0767,3,1,0.1	cog0500 cog5212 cog0767	3	1	0.1
cog0503 cog0655 cog1683,3,1,0.1	cog0503 cog0655 cog1683	3	1	0.1
cog0503 cog0751 cog0752,3,1,0.1	cog0503 cog0751 cog0752	3	1	0.1
cog0503 cog1108 cog0661,3,1,0.1	cog0503 cog1108 cog0661	3	1	0.1
cog0513 cog0358 cog0648,3,1,0.1	cog0513 cog0358 cog0648	3	1	0.1
cog0513 cog0539 cog3228,3,1,0.1	cog0513 cog0539 cog3228	3	1	0.1
cog0513 cog0648 cog1806,3,1,0.1	cog0513 cog0648 cog1806	3	1	0.1
cog0513 cog0699 cog0503,3,1,0.1	cog0513 cog0699 cog0503	3	1	0.1
cog0513 cog1284 cog0541,3,1,0.1	cog0513 cog1284 cog0541	3	1	0.1
cog0515 cog0517 cog0793,3,1,0.1	cog0515 cog0517 cog0793	3	1	0.1
cog0517 cog0793 cog0457,3,1,0.1	cog0517 cog0793 cog0457	3	1	0.1
cog0520 cog0647 cog0607,3,1,0.1	cog0520 cog0647 cog0607	3	1	0.1
cog0525 cog2094 cog1173,3,1,0.1	cog0525 cog2094 cog1173	3	1	0.1
cog0525 cog3842 cog0739,3,1,0.1	cog0525 cog3842 cog0739	3	1	0.1
cog0525 cog4912 cog0527,3,1,0.1	cog0525 cog4912 cog0527	3	1	0.1
cog0526 cog0457 cog0596,3,1,0.1	cog0526 cog0457 cog0596	3	1	0.1
cog0527 cog0735 cog1702,3,1,0.1	cog0527 cog0735 cog1702	3	1	0.1
cog0531 cog1087 cog0463,3,1,0.1	cog0531 cog1087 cog0463	3	1	0.1
cog0531 cog1087 cog0639,3,1,0.1	cog0531 cog1087 cog0639	3	1	0.1
cog0531 cog1322 cog1793,3,1,0.1	cog0531 cog1322 cog1793	3	1	0.1
cog0531 cog3467 cog0685,3,1,0.1	cog0531 cog3467 cog0685	3	1	0.1
cog0539 cog3228 cog2120,3,1,0.1	cog0539 cog3228 cog2120	3	1	0.1
cog0541 cog0162 cog0264,3,1,0.1	cog0541 cog0162 cog0264	3	1	0.1
cog0541 cog0228 cog1837,3,1,0.1	cog0541 cog0228 cog1837	3	1	0.1
cog0541 cog0335 cog0336,3,1,0.1	cog0541 cog0335 cog0336	3	1	0.1
cog0541 cog3817 cog3819,3,1,0.1	cog0541 cog3817 cog3819	3	1	0.1
cog0542 cog0572 cog0232,3,1,0.1	cog0542 cog0572 cog0232	3	1	0.1
cog0542 cog1671 cog0428,3,1,0.1	cog0542 cog1671 cog0428	3	1	0.1
cog0544 cog0352 cog0351,3,1,0.1	cog0544 cog0352 cog0351	3	1	0.1
cog0544 cog0466 cog1354,3,1,0.1	cog0544 cog0466 cog1354	3	1	0.1
cog0548 cog2156 cog0210,3,1,0.1	cog0548 cog2156 cog0210	3	1	0.1
cog0553 cog1169 cog1426,3,1,0.1	cog0553 cog1169 cog1426	3	1	0.1
cog0553 cog1169 cog2315,3,1,0.1	cog0553 cog1169 cog2315	3	1	0.1
cog0557 cog1653 cog2971,3,1,0.1	cog0557 cog1653 cog2971	3	1	0.1
cog0558 cog0605 cog1606,3,1,0.1	cog0558 cog0605 cog1606	3	1	0.1
cog0562 cog0605 cog0327,3,1,0.1	cog0562 cog0605 cog0327	3	1	0.1
cog0563 cog1555 cog0558,3,1,0.1	cog0563 cog1555 cog0558	3	1	0.1
cog0564 cog0079 cog3935,3,1,0.1	cog0564 cog0079 cog3935	3	1	0.1
cog0564 cog0327 cog0125,3,1,0.1	cog0564 cog0327 cog0125	3	1	0.1
cog0564 cog0682 cog0240,3,1,0.1	cog0564 cog0682 cog0240	3	1	0.1
cog0564 cog0752 cog0240,3,1,0.1	cog0564 cog0752 cog0240	3	1	0.1
cog0568 cog0266 cog1194,3,1,0.1	cog0568 cog0266 cog1194	3	1	0.1
cog0568 cog0358 cog0423,3,1,0.1	cog0568 cog0358 cog0423	3	1	0.1
cog0568 cog0358 cog0661,3,1,0.1	cog0568 cog0358 cog0661	3	1	0.1
cog0568 cog0358 cog3935,3,1,0.1	cog0568 cog0358 cog3935	3	1	0.1
cog0568 cog1191 cog0760,3,1,0.1	cog0568 cog1191 cog0760	3	1	0.1
cog0568 cog1897 cog0513,3,1,0.1	cog0568 cog1897 cog0513	3	1	0.1
cog0568 cog4542 cog0352,3,1,0.1	cog0568 cog4542 cog0352	3	1	0.1
cog0572 cog0232 cog1293,3,1,0.1	cog0572 cog0232 cog1293	3	1	0.1
cog0572 cog0232 cog3937,3,1,0.1	cog0572 cog0232 cog3937	3	1	0.1
cog0576 cog2131 cog2270,3,1,0.1	cog0576 cog2131 cog2270	3	1	0.1
cog0577 cog0102 cog0103,3,1,0.1	cog0577 cog0102 cog0103	3	1	0.1
cog0582 cog1109 cog0577,3,1,0.1	cog0582 cog1109 cog0577	3	1	0.1
cog0582 cog3104 cog0330,3,1,0.1	cog0582 cog3104 cog0330	3	1	0.1
cog0583 cog0271 cog1052,3,1,0.1	cog0583 cog0271 cog1052	3	1	0.1
cog0583 cog2969 cog3039,3,1,0.1	cog0583 cog2969 cog3039	3	1	0.1
cog0591 cog2378 cog0145,3,1,0.1	cog0591 cog2378 cog0145	3	1	0.1
cog0595 cog0812 cog1124,3,1,0.1	cog0595 cog0812 cog1124	3	1	0.1
cog0596 cog0205 cog2270,3,1,0.1	cog0596 cog0205 cog2270	3	1	0.1
cog0596 cog0454 cog1124,3,1,0.1	cog0596 cog0454 cog1124	3	1	0.1
cog0596 cog0595 cog0812,3,1,0.1	cog0596 cog0595 cog0812	3	1	0.1
cog0596 cog1165 cog1434,3,1,0.1	cog0596 cog1165 cog1434	3	1	0.1
cog0596 cog4508 cog0225,3,1,0.1	cog0596 cog4508 cog0225	3	1	0.1
cog0597 cog0761 cog0264,3,1,0.1	cog0597 cog0761 cog0264	3	1	0.1
cog0597 cog1137 cog1496,3,1,0.1	cog0597 cog1137 cog1496	3	1	0.1
cog0601 cog0364 cog1028,3,1,0.1	cog0601 cog0364 cog1028	3	1	0.1
cog0601 cog0641 cog0596,3,1,0.1	cog0601 cog0641 cog0596	3	1	0.1
cog0601 cog0793 cog1028,3,1,0.1	cog0601 cog0793 cog1028	3	1	0.1
cog0603 cog0040 cog1028,3,1,0.1	cog0603 cog0040 cog1028	3	1	0.1
cog0603 cog1388 cog2220,3,1,0.1	cog0603 cog1388 cog2220	3	1	0.1
cog0605 cog0327 cog0597,3,1,0.1	cog0605 cog0327 cog0597	3	1	0.1
cog0605 cog1606 cog0601,3,1,0.1	cog0605 cog1606 cog0601	3	1	0.1
cog0607 cog1837 cog1121,3,1,0.1	cog0607 cog1837 cog1121	3	1	0.1
cog0607 cog2267 cog0327,3,1,0.1	cog0607 cog2267 cog0327	3	1	0.1
cog0607 cog3631 cog0225,3,1,0.1	cog0607 cog3631 cog0225	3	1	0.1
cog0612 cog1524 cog0484,3,1,0.1	cog0612 cog1524 cog0484	3	1	0.1
cog0612 cog3387 cog0444,3,1,0.1	cog0612 cog3387 cog0444	3	1	0.1
cog0617 cog1682 cog0271,3,1,0.1	cog0617 cog1682 cog0271	3	1	0.1
cog0620 cog1160 cog1063,3,1,0.1	cog0620 cog1160 cog1063	3	1	0.1
cog0625 cog0245 cog1290,3,1,0.1	cog0625 cog0245 cog1290	3	1	0.1
cog0625 cog1290 cog0723,3,1,0.1	cog0625 cog1290 cog0723	3	1	0.1
cog0626 cog0146 cog2229,3,1,0.1	cog0626 cog0146 cog2229	3	1	0.1
cog0626 cog1192 cog1312,3,1,0.1	cog0626 cog1192 cog1312	3	1	0.1
cog0628 cog0329 cog4720,3,1,0.1	cog0628 cog0329 cog4720	3	1	0.1
cog0634 cog1211 cog1136,3,1,0.1	cog0634 cog1211 cog1136	3	1	0.1
cog0634 cog3027 cog0157,3,1,0.1	cog0634 cog3027 cog0157	3	1	0.1
cog0635 cog1306 cog1796,3,1,0.1	cog0635 cog1306 cog1796	3	1	0.1
cog0639 cog4347 cog0116,3,1,0.1	cog0639 cog4347 cog0116	3	1	0.1
cog0639 cog4347 cog4550,3,1,0.1	cog0639 cog4347 cog4550	3	1	0.1
cog0641 cog0596 cog0454,3,1,0.1	cog0641 cog0596 cog0454	3	1	0.1
cog0645 cog0327 cog2384,3,1,0.1	cog0645 cog0327 cog2384	3	1	0.1
cog0647 cog0607 cog2267,3,1,0.1	cog0647 cog0607 cog2267	3	1	0.1
cog0648 cog0513 cog1284,3,1,0.1	cog0648 cog0513 cog1284	3	1	0.1
cog0648 cog0542 cog1671,3,1,0.1	cog0648 cog0542 cog1671	3	1	0.1
cog0648 cog0778 cog0541,3,1,0.1	cog0648 cog0778 cog0541	3	1	0.1
cog0648 cog1806 cog1088,3,1,0.1	cog0648 cog1806 cog1088	3	1	0.1
cog0655 cog0249 cog3655,3,1,0.1	cog0655 cog0249 cog3655	3	1	0.1
cog0655 cog0525 cog2094,3,1,0.1	cog0655 cog0525 cog2094	3	1	0.1
cog0655 cog1683 cog0335,3,1,0.1	cog0655 cog1683 cog0335	3	1	0.1
cog0656 cog0760 cog0761,3,1,0.1	cog0656 cog0760 cog0761	3	1	0.1
cog0658 cog0454 cog1165,3,1,0.1	cog0658 cog0454 cog1165	3	1	0.1
cog0661 cog0441 cog0272,3,1,0.1	cog0661 cog0441 cog0272	3	1	0.1
cog0661 cog1159 cog3326,3,1,0.1	cog0661 cog1159 cog3326	3	1	0.1
cog0665 cog0568 cog0266,3,1,0.1	cog0665 cog0568 cog0266	3	1	0.1
cog0665 cog2195 cog0568,3,1,0.1	cog0665 cog2195 cog0568	3	1	0.1
cog0665 cog2195 cog1898,3,1,0.1	cog0665 cog2195 cog1898	3	1	0.1
cog0666 cog0864 cog1393,3,1,0.1	cog0666 cog0864 cog1393	3	1	0.1
cog0673 cog0801 cog0327,3,1,0.1	cog0673 cog0801 cog0327	3	1	0.1
cog0674 cog0327 cog2890,3,1,0.1	cog0674 cog0327 cog2890	3	1	0.1
cog0674 cog4508 cog2854,3,1,0.1	cog0674 cog4508 cog2854	3	1	0.1
cog0682 cog0041 cog0494,3,1,0.1	cog0682 cog0041 cog0494	3	1	0.1
cog0682 cog0240 cog0778,3,1,0.1	cog0682 cog0240 cog0778	3	1	0.1
cog0682 cog0415 cog3272,3,1,0.1	cog0682 cog0415 cog3272	3	1	0.1
cog0685 cog1134 cog1131,3,1,0.1	cog0685 cog1134 cog1131	3	1	0.1
cog0691 cog3200 cog1538,3,1,0.1	cog0691 cog3200 cog1538	3	1	0.1
cog0693 cog0327 cog1579,3,1,0.1	cog0693 cog0327 cog1579	3	1	0.1
cog0694 cog0648 cog0513,3,1,0.1	cog0694 cog0648 cog0513	3	1	0.1
cog0695 cog1692 cog0221,3,1,0.1	cog0695 cog1692 cog0221	3	1	0.1
cog0695 cog1897 cog0457,3,1,0.1	cog0695 cog1897 cog0457	3	1	0.1
cog0695 cog2060 cog0327,3,1,0.1	cog0695 cog2060 cog0327	3	1	0.1
cog0699 cog0503 cog0655,3,1,0.1	cog0699 cog0503 cog0655	3	1	0.1
cog0699 cog0695 cog1897,3,1,0.1	cog0699 cog0695 cog1897	3	1	0.1
cog0699 cog1366 cog1897,3,1,0.1	cog0699 cog1366 cog1897	3	1	0.1
cog0704 cog0327 cog0327,3,1,0.1	cog0704 cog0327 cog0327	3	1	0.1
cog0720 cog0626 cog0146,3,1,0.1	cog0720 cog0626 cog0146	3	1	0.1
cog0720 cog0674 cog4508,3,1,0.1	cog0720 cog0674 cog4508	3	1	0.1
cog0723 cog0102 cog0103,3,1,0.1	cog0723 cog0102 cog0103	3	1	0.1
cog0723 cog2857 cog0531,3,1,0.1	cog0723 cog2857 cog0531	3	1	0.1
cog0727 cog0674 cog0327,3,1,0.1	cog0727 cog0674 cog0327	3	1	0.1
cog0727 cog0720 cog0674,3,1,0.1	cog0727 cog0720 cog0674	3	1	0.1
cog0728 cog0729 cog0438,3,1,0.1	cog0728 cog0729 cog0438	3	1	0.1
cog0729 cog0438 cog0141,3,1,0.1	cog0729 cog0438 cog0141	3	1	0.1
cog0730 cog0822 cog0344,3,1,0.1	cog0730 cog0822 cog0344	3	1	0.1
cog0735 cog0727 cog0674,3,1,0.1	cog0735 cog0727 cog0674	3	1	0.1
cog0735 cog1132 cog0751,3,1,0.1	cog0735 cog1132 cog0751	3	1	0.1
cog0735 cog1702 cog1385,3,1,0.1	cog0735 cog1702 cog1385	3	1	0.1
cog0735 cog1802 cog1028,3,1,0.1	cog0735 cog1802 cog1028	3	1	0.1
cog0739 cog0037 cog0016,3,1,0.1	cog0739 cog0037 cog0016	3	1	0.1
cog0739 cog0130 cog3708,3,1,0.1	cog0739 cog0130 cog3708	3	1	0.1
cog0745 cog0040 cog5212,3,1,0.1	cog0745 cog0040 cog5212	3	1	0.1
cog0745 cog2205 cog2156,3,1,0.1	cog0745 cog2205 cog2156	3	1	0.1
cog0747 cog0601 cog0364,3,1,0.1	cog0747 cog0601 cog0364	3	1	0.1
cog0747 cog1073 cog0457,3,1,0.1	cog0747 cog1073 cog0457	3	1	0.1
cog0747 cog1073 cog0601,3,1,0.1	cog0747 cog1073 cog0601	3	1	0.1
cog0749 cog0258 cog3744,3,1,0.1	cog0749 cog0258 cog3744	3	1	0.1
cog0749 cog0806 cog1744,3,1,0.1	cog0749 cog0806 cog1744	3	1	0.1
cog0751 cog0749 cog0806,3,1,0.1	cog0751 cog0749 cog0806	3	1	0.1
cog0751 cog0752 cog0177,3,1,0.1	cog0751 cog0752 cog0177	3	1	0.1
cog0751 cog0752 cog1227,3,1,0.1	cog0751 cog0752 cog1227	3	1	0.1
cog0751 cog2827 cog0327,3,1,0.1	cog0751 cog2827 cog0327	3	1	0.1
cog0752 cog0177 cog0761,3,1,0.1	cog0752 cog0177 cog0761	3	1	0.1
cog0752 cog0240 cog0778,3,1,0.1	cog0752 cog0240 cog0778	3	1	0.1
cog0752 cog0564 cog0682,3,1,0.1	cog0752 cog0564 cog0682	3	1	0.1
cog0752 cog1227 cog2755,3,1,0.1	cog0752 cog1227 cog2755	3	1	0.1
cog0752 cog1519 cog2195,3,1,0.1	cog0752 cog1519 cog2195	3	1	0.1
cog0756 cog0079 cog0583,3,1,0.1	cog0756 cog0079 cog0583	3	1	0.1
cog0760 cog0358 cog0327,3,1,0.1	cog0760 cog0358 cog0327	3	1	0.1
cog0760 cog0761 cog0494,3,1,0.1	cog0760 cog0761 cog0494	3	1	0.1
cog0760 cog1432 cog2010,3,1,0.1	cog0760 cog1432 cog2010	3	1	0.1
cog0760 cog1732 cog1426,3,1,0.1	cog0760 cog1732 cog1426	3	1	0.1
cog0761 cog0264 cog0258,3,1,0.1	cog0761 cog0264 cog0258	3	1	0.1
cog0761 cog0494 cog1108,3,1,0.1	cog0761 cog0494 cog1108	3	1	0.1
cog0761 cog1227 cog0441,3,1,0.1	cog0761 cog1227 cog0441	3	1	0.1
cog0766 cog0228 cog0806,3,1,0.1	cog0766 cog0228 cog0806	3	1	0.1
cog0766 cog2135 cog0392,3,1,0.1	cog0766 cog2135 cog0392	3	1	0.1
cog0766 cog2854 cog1463,3,1,0.1	cog0766 cog2854 cog1463	3	1	0.1
cog0766 cog4603 cog0125,3,1,0.1	cog0766 cog4603 cog0125	3	1	0.1
cog0767 cog0766 cog0228,3,1,0.1	cog0767 cog0766 cog0228	3	1	0.1
cog0767 cog0766 cog2854,3,1,0.1	cog0767 cog0766 cog2854	3	1	0.1
cog0767 cog1108 cog0626,3,1,0.1	cog0767 cog1108 cog0626	3	1	0.1
cog0768 cog1296 cog1194,3,1,0.1	cog0768 cog1296 cog1194	3	1	0.1
cog0769 cog0607 cog3631,3,1,0.1	cog0769 cog0607 cog3631	3	1	0.1
cog0778 cog0541 cog3817,3,1,0.1	cog0778 cog0541 cog3817	3	1	0.1
cog0778 cog0682 cog0415,3,1,0.1	cog0778 cog0682 cog0415	3	1	0.1
cog0778 cog0826 cog0041,3,1,0.1	cog0778 cog0826 cog0041	3	1	0.1
cog0789 cog1802 cog1610,3,1,0.1	cog0789 cog1802 cog1610	3	1	0.1
cog0789 cog2003 cog0513,3,1,0.1	cog0789 cog2003 cog0513	3	1	0.1
cog0793 cog0457 cog1225,3,1,0.1	cog0793 cog0457 cog1225	3	1	0.1
cog0793 cog1028 cog1692,3,1,0.1	cog0793 cog1028 cog1692	3	1	0.1
cog0799 cog3696 cog1057,3,1,0.1	cog0799 cog3696 cog1057	3	1	0.1
cog0801 cog0217 cog4118,3,1,0.1	cog0801 cog0217 cog4118	3	1	0.1
cog0801 cog0327 cog2049,3,1,0.1	cog0801 cog0327 cog2049	3	1	0.1
cog0806 cog0699 cog0695,3,1,0.1	cog0806 cog0699 cog0695	3	1	0.1
cog0806 cog1463 cog0699,3,1,0.1	cog0806 cog1463 cog0699	3	1	0.1
cog0806 cog1744 cog0115,3,1,0.1	cog0806 cog1744 cog0115	3	1	0.1
cog0812 cog1124 cog0818,3,1,0.1	cog0812 cog1124 cog0818	3	1	0.1
cog0818 cog0494 cog0268,3,1,0.1	cog0818 cog0494 cog0268	3	1	0.1
cog0821 cog0826 cog0828,3,1,0.1	cog0821 cog0826 cog0828	3	1	0.1
cog0822 cog0344 cog1196,3,1,0.1	cog0822 cog0344 cog1196	3	1	0.1
cog0826 cog0041 cog1196,3,1,0.1	cog0826 cog0041 cog1196	3	1	0.1
cog0826 cog0828 cog0488,3,1,0.1	cog0826 cog0828 cog0488	3	1	0.1
cog0826 cog1802 cog0747,3,1,0.1	cog0826 cog1802 cog0747	3	1	0.1
cog0826 cog2039 cog1088,3,1,0.1	cog0826 cog2039 cog1088	3	1	0.1
cog0826 cog3817 cog0041,3,1,0.1	cog0826 cog3817 cog0041	3	1	0.1
cog0828 cog0488 cog4767,3,1,0.1	cog0828 cog0488 cog4767	3	1	0.1
cog0840 cog0426 cog0327,3,1,0.1	cog0840 cog0426 cog0327	3	1	0.1
cog0842 cog0215 cog2969,3,1,0.1	cog0842 cog0215 cog2969	3	1	0.1
cog0842 cog0463 cog0562,3,1,0.1	cog0842 cog0463 cog0562	3	1	0.1
cog0842 cog0466 cog3845,3,1,0.1	cog0842 cog0466 cog3845	3	1	0.1
cog0845 cog1706 cog0751,3,1,0.1	cog0845 cog1706 cog0751	3	1	0.1
cog0864 cog1393 cog1671,3,1,0.1	cog0864 cog1393 cog1671	3	1	0.1
cog1011 cog0768 cog1296,3,1,0.1	cog1011 cog0768 cog1296	3	1	0.1
cog1011 cog3103 cog1606,3,1,0.1	cog1011 cog3103 cog1606	3	1	0.1
cog1013 cog0009 cog0767,3,1,0.1	cog1013 cog0009 cog0767	3	1	0.1
cog1013 cog1763 cog2206,3,1,0.1	cog1013 cog1763 cog2206	3	1	0.1
cog1014 cog1013 cog0009,3,1,0.1	cog1014 cog1013 cog0009	3	1	0.1
cog1014 cog1013 cog1763,3,1,0.1	cog1014 cog1013 cog1763	3	1	0.1
cog1023 cog0075 cog1427,3,1,0.1	cog1023 cog0075 cog1427	3	1	0.1
cog1028 cog0596 cog1165,3,1,0.1	cog1028 cog0596 cog1165	3	1	0.1
cog1028 cog0620 cog1160,3,1,0.1	cog1028 cog0620 cog1160	3	1	0.1
cog1028 cog0695 cog1692,3,1,0.1	cog1028 cog0695 cog1692	3	1	0.1
cog1028 cog1692 cog2264,3,1,0.1	cog1028 cog1692 cog2264	3	1	0.1
cog1028 cog4608 cog1533,3,1,0.1	cog1028 cog4608 cog1533	3	1	0.1
cog1051 cog3103 cog1180,3,1,0.1	cog1051 cog3103 cog1180	3	1	0.1
cog1052 cog3104 cog0008,3,1,0.1	cog1052 cog3104 cog0008	3	1	0.1
cog1057 cog0666 cog0864,3,1,0.1	cog1057 cog0666 cog0864	3	1	0.1
cog1058 cog0443 cog1249,3,1,0.1	cog1058 cog0443 cog1249	3	1	0.1
cog1060 cog1023 cog0075,3,1,0.1	cog1060 cog1023 cog0075	3	1	0.1
cog1063 cog0346 cog3246,3,1,0.1	cog1063 cog0346 cog3246	3	1	0.1
cog1073 cog0457 cog0323,3,1,0.1	cog1073 cog0457 cog0323	3	1	0.1
cog1073 cog0601 cog0641,3,1,0.1	cog1073 cog0601 cog0641	3	1	0.1
cog1079 cog0327 cog1579,3,1,0.1	cog1079 cog0327 cog1579	3	1	0.1
cog1080 cog0634 cog3027,3,1,0.1	cog1080 cog0634 cog3027	3	1	0.1
cog1080 cog3467 cog1309,3,1,0.1	cog1080 cog3467 cog1309	3	1	0.1
cog1087 cog0463 cog0515,3,1,0.1	cog1087 cog0463 cog0515	3	1	0.1
cog1088 cog0177 cog0568,3,1,0.1	cog1088 cog0177 cog0568	3	1	0.1
cog1088 cog0648 cog0778,3,1,0.1	cog1088 cog0648 cog0778	3	1	0.1
cog1088 cog0751 cog0752,3,1,0.1	cog1088 cog0751 cog0752	3	1	0.1
cog1104 cog1396 cog1387,3,1,0.1	cog1104 cog1396 cog1387	3	1	0.1
cog1108 cog0626 cog1192,3,1,0.1	cog1108 cog0626 cog1192	3	1	0.1
cog1108 cog0661 cog1159,3,1,0.1	cog1108 cog0661 cog1159	3	1	0.1
cog1108 cog1312 cog1853,3,1,0.1	cog1108 cog1312 cog1853	3	1	0.1
cog1109 cog0577 cog0102,3,1,0.1	cog1109 cog0577 cog0102	3	1	0.1
cog1112 cog0221 cog0693,3,1,0.1	cog1112 cog0221 cog0693	3	1	0.1
cog1121 cog0656 cog0760,3,1,0.1	cog1121 cog0656 cog0760	3	1	0.1
cog1121 cog1125 cog0760,3,1,0.1	cog1121 cog1125 cog0760	3	1	0.1
cog1121 cog1539 cog1124,3,1,0.1	cog1121 cog1539 cog1124	3	1	0.1
cog1124 cog0760 cog1432,3,1,0.1	cog1124 cog0760 cog1432	3	1	0.1
cog1124 cog0818 cog0494,3,1,0.1	cog1124 cog0818 cog0494	3	1	0.1
cog1124 cog2382 cog2211,3,1,0.1	cog1124 cog2382 cog2211	3	1	0.1
cog1125 cog0760 cog1732,3,1,0.1	cog1125 cog0760 cog1732	3	1	0.1
cog1127 cog1079 cog0327,3,1,0.1	cog1127 cog1079 cog0327	3	1	0.1
cog1127 cog2854 cog1837,3,1,0.1	cog1127 cog2854 cog1837	3	1	0.1
cog1127 cog4121 cog5007,3,1,0.1	cog1127 cog4121 cog5007	3	1	0.1
cog1131 cog0789 cog2003,3,1,0.1	cog1131 cog0789 cog2003	3	1	0.1
cog1131 cog0842 cog0215,3,1,0.1	cog1131 cog0842 cog0215	3	1	0.1
cog1131 cog0842 cog0463,3,1,0.1	cog1131 cog0842 cog0463	3	1	0.1
cog1131 cog0842 cog0466,3,1,0.1	cog1131 cog0842 cog0466	3	1	0.1
cog1132 cog0596 cog4508,3,1,0.1	cog1132 cog0596 cog4508	3	1	0.1
cog1132 cog0751 cog0749,3,1,0.1	cog1132 cog0751 cog0749	3	1	0.1
cog1134 cog1131 cog0842,3,1,0.1	cog1134 cog1131 cog0842	3	1	0.1
cog1136 cog1131 cog0842,3,1,0.1	cog1136 cog1131 cog0842	3	1	0.1
cog1137 cog1131 cog0842,3,1,0.1	cog1137 cog1131 cog0842	3	1	0.1
cog1137 cog1496 cog1692,3,1,0.1	cog1137 cog1496 cog1692	3	1	0.1
cog1141 cog4720 cog0531,3,1,0.1	cog1141 cog4720 cog0531	3	1	0.1
cog1144 cog0147 cog1475,3,1,0.1	cog1144 cog0147 cog1475	3	1	0.1
cog1144 cog1014 cog1013,3,1,0.1	cog1144 cog1014 cog1013	3	1	0.1
cog1159 cog2274 cog0344,3,1,0.1	cog1159 cog2274 cog0344	3	1	0.1
cog1159 cog3326 cog1381,3,1,0.1	cog1159 cog3326 cog1381	3	1	0.1
cog1160 cog1063 cog0346,3,1,0.1	cog1160 cog1063 cog0346	3	1	0.1
cog1164 cog0564 cog0327,3,1,0.1	cog1164 cog0564 cog0327	3	1	0.1
cog1165 cog0553 cog1169,3,1,0.1	cog1165 cog0553 cog1169	3	1	0.1
cog1165 cog1434 cog0553,3,1,0.1	cog1165 cog1434 cog0553	3	1	0.1
cog1169 cog1426 cog0351,3,1,0.1	cog1169 cog1426 cog0351	3	1	0.1
cog1169 cog2315 cog3481,3,1,0.1	cog1169 cog2315 cog3481	3	1	0.1
cog1173 cog0826 cog1802,3,1,0.1	cog1173 cog0826 cog1802	3	1	0.1
cog1173 cog1896 cog0789,3,1,0.1	cog1173 cog1896 cog0789	3	1	0.1
cog1174 cog2755 cog1434,3,1,0.1	cog1174 cog2755 cog1434	3	1	0.1
cog1175 cog0461 cog1486,3,1,0.1	cog1175 cog0461 cog1486	3	1	0.1
cog1180 cog0183 cog0576,3,1,0.1	cog1180 cog0183 cog0576	3	1	0.1
cog1188 cog1080 cog0634,3,1,0.1	cog1188 cog1080 cog0634	3	1	0.1
cog1191 cog0760 cog0358,3,1,0.1	cog1191 cog0760 cog0358	3	1	0.1
cog1192 cog1312 cog0141,3,1,0.1	cog1192 cog1312 cog0141	3	1	0.1
cog1194 cog0358 cog0752,3,1,0.1	cog1194 cog0358 cog0752	3	1	0.1
cog1194 cog0628 cog0329,3,1,0.1	cog1194 cog0628 cog0329	3	1	0.1
cog1194 cog1164 cog0564,3,1,0.1	cog1194 cog1164 cog0564	3	1	0.1
cog1194 cog1314 cog2384,3,1,0.1	cog1194 cog1314 cog2384	3	1	0.1
cog1196 cog0513 cog0699,3,1,0.1	cog1196 cog0513 cog0699	3	1	0.1
cog1196 cog0541 cog0228,3,1,0.1	cog1196 cog0541 cog0228	3	1	0.1
cog1196 cog2905 cog0240,3,1,0.1	cog1196 cog2905 cog0240	3	1	0.1
cog1196 cog3819 cog1127,3,1,0.1	cog1196 cog3819 cog1127	3	1	0.1
cog1209 cog1898 cog0564,3,1,0.1	cog1209 cog1898 cog0564	3	1	0.1
cog1209 cog1898 cog1579,3,1,0.1	cog1209 cog1898 cog1579	3	1	0.1
cog1209 cog3935 cog1088,3,1,0.1	cog1209 cog3935 cog1088	3	1	0.1
cog1211 cog0328 cog0008,3,1,0.1	cog1211 cog0328 cog0008	3	1	0.1
cog1211 cog1136 cog1131,3,1,0.1	cog1211 cog1136 cog1131	3	1	0.1
cog1216 cog2216 cog0040,3,1,0.1	cog1216 cog2216 cog0040	3	1	0.1
cog1225 cog0327 cog2384,3,1,0.1	cog1225 cog0327 cog2384	3	1	0.1
cog1225 cog1695 cog0596,3,1,0.1	cog1225 cog1695 cog0596	3	1	0.1
cog1227 cog0441 cog0542,3,1,0.1	cog1227 cog0441 cog0542	3	1	0.1
cog1227 cog1802 cog0597,3,1,0.1	cog1227 cog1802 cog0597	3	1	0.1
cog1227 cog2755 cog1121,3,1,0.1	cog1227 cog2755 cog1121	3	1	0.1
cog1228 cog1173 cog1896,3,1,0.1	cog1228 cog1173 cog1896	3	1	0.1
cog1228 cog2846 cog1896,3,1,0.1	cog1228 cog2846 cog1896	3	1	0.1
cog1247 cog1954 cog1228,3,1,0.1	cog1247 cog1954 cog1228	3	1	0.1
cog1249 cog4948 cog2333,3,1,0.1	cog1249 cog4948 cog2333	3	1	0.1
cog1284 cog0541 cog0162,3,1,0.1	cog1284 cog0541 cog0162	3	1	0.1
cog1284 cog0568 cog4542,3,1,0.1	cog1284 cog0568 cog4542	3	1	0.1
cog1284 cog1137 cog1131,3,1,0.1	cog1284 cog1137 cog1131	3	1	0.1
cog1290 cog0723 cog0102,3,1,0.1	cog1290 cog0723 cog0102	3	1	0.1
cog1290 cog0723 cog2857,3,1,0.1	cog1290 cog0723 cog2857	3	1	0.1
cog1293 cog0328 cog1174,3,1,0.1	cog1293 cog0328 cog1174	3	1	0.1
cog1293 cog0655 cog0525,3,1,0.1	cog1293 cog0655 cog0525	3	1	0.1
cog1295 cog0625 cog0245,3,1,0.1	cog1295 cog0625 cog0245	3	1	0.1
cog1296 cog1194 cog0628,3,1,0.1	cog1296 cog1194 cog0628	3	1	0.1
cog1306 cog1796 cog1228,3,1,0.1	cog1306 cog1796 cog1228	3	1	0.1
cog1306 cog1796 cog1480,3,1,0.1	cog1306 cog1796 cog1480	3	1	0.1
cog1309 cog0634 cog1211,3,1,0.1	cog1309 cog0634 cog1211	3	1	0.1
cog1312 cog0141 cog1144,3,1,0.1	cog1312 cog0141 cog1144	3	1	0.1
cog1312 cog1853 cog4912,3,1,0.1	cog1312 cog1853 cog4912	3	1	0.1
cog1314 cog2384 cog0327,3,1,0.1	cog1314 cog2384 cog0327	3	1	0.1
cog1322 cog1793 cog0583,3,1,0.1	cog1322 cog1793 cog0583	3	1	0.1
cog1322 cog1793 cog2216,3,1,0.1	cog1322 cog1793 cog2216	3	1	0.1
cog1354 cog0727 cog0720,3,1,0.1	cog1354 cog0727 cog0720	3	1	0.1
cog1354 cog1132 cog0596,3,1,0.1	cog1354 cog1132 cog0596	3	1	0.1
cog1366 cog0079 cog0617,3,1,0.1	cog1366 cog0079 cog0617	3	1	0.1
cog1366 cog1897 cog2873,3,1,0.1	cog1366 cog1897 cog2873	3	1	0.1
cog1378 cog0747 cog0601,3,1,0.1	cog1378 cog0747 cog0601	3	1	0.1
cog1381 cog0319 cog1159,3,1,0.1	cog1381 cog0319 cog1159	3	1	0.1
cog1381 cog4392 cog1121,3,1,0.1	cog1381 cog4392 cog1121	3	1	0.1
cog1385 cog1420 cog0319,3,1,0.1	cog1385 cog1420 cog0319	3	1	0.1
cog1386 cog0232 cog0801,3,1,0.1	cog1386 cog0232 cog0801	3	1	0.1
cog1386 cog0544 cog0466,3,1,0.1	cog1386 cog0544 cog0466	3	1	0.1
cog1387 cog0591 cog2378,3,1,0.1	cog1387 cog0591 cog2378	3	1	0.1
cog1387 cog1386 cog0232,3,1,0.1	cog1387 cog1386 cog0232	3	1	0.1
cog1388 cog2220 cog0009,3,1,0.1	cog1388 cog2220 cog0009	3	1	0.1
cog1393 cog1671 cog5124,3,1,0.1	cog1393 cog1671 cog5124	3	1	0.1
cog1396 cog1387 cog0591,3,1,0.1	cog1396 cog1387 cog0591	3	1	0.1
cog1413 cog0673 cog0801,3,1,0.1	cog1413 cog0673 cog0801	3	1	0.1
cog1418 cog1225 cog1695,3,1,0.1	cog1418 cog1225 cog1695	3	1	0.1
cog1420 cog0319 cog1882,3,1,0.1	cog1420 cog0319 cog1882	3	1	0.1
cog1426 cog0351 cog3725,3,1,0.1	cog1426 cog0351 cog3725	3	1	0.1
cog1426 cog0612 cog1524,3,1,0.1	cog1426 cog0612 cog1524	3	1	0.1
cog1427 cog0612 cog3387,3,1,0.1	cog1427 cog0612 cog3387	3	1	0.1
cog1430 cog0177 cog1196,3,1,0.1	cog1430 cog0177 cog1196	3	1	0.1
cog1430 cog0346 cog3823,3,1,0.1	cog1430 cog0346 cog3823	3	1	0.1
cog1432 cog0799 cog3696,3,1,0.1	cog1432 cog0799 cog3696	3	1	0.1
cog1432 cog2010 cog3133,3,1,0.1	cog1432 cog2010 cog3133	3	1	0.1
cog1434 cog0553 cog1169,3,1,0.1	cog1434 cog0553 cog1169	3	1	0.1
cog1434 cog2010 cog0503,3,1,0.1	cog1434 cog2010 cog0503	3	1	0.1
cog1452 cog1934 cog0766,3,1,0.1	cog1452 cog1934 cog0766	3	1	0.1
cog1463 cog0461 cog2220,3,1,0.1	cog1463 cog0461 cog2220	3	1	0.1
cog1463 cog0699 cog1366,3,1,0.1	cog1463 cog0699 cog1366	3	1	0.1
cog1463 cog1127 cog4121,3,1,0.1	cog1463 cog1127 cog4121	3	1	0.1
cog1466 cog0295 cog4932,3,1,0.1	cog1466 cog0295 cog4932	3	1	0.1
cog1475 cog1284 cog1137,3,1,0.1	cog1475 cog1284 cog1137	3	1	0.1
cog1480 cog0136 cog1466,3,1,0.1	cog1480 cog0136 cog1466	3	1	0.1
cog1486 cog0395 cog0557,3,1,0.1	cog1486 cog0395 cog0557	3	1	0.1
cog1496 cog1692 cog1452,3,1,0.1	cog1496 cog1692 cog1452	3	1	0.1
cog1496 cog1934 cog1523,3,1,0.1	cog1496 cog1934 cog1523	3	1	0.1
cog1519 cog0564 cog0752,3,1,0.1	cog1519 cog0564 cog0752	3	1	0.1
cog1519 cog0752 cog0564,3,1,0.1	cog1519 cog0752 cog0564	3	1	0.1
cog1519 cog2195 cog1209,3,1,0.1	cog1519 cog2195 cog1209	3	1	0.1
cog1523 cog0271 cog1014,3,1,0.1	cog1523 cog0271 cog1014	3	1	0.1
cog1523 cog3707 cog4118,3,1,0.1	cog1523 cog3707 cog4118	3	1	0.1
cog1524 cog0484 cog0272,3,1,0.1	cog1524 cog0484 cog0272	3	1	0.1
cog1524 cog4948 cog0481,3,1,0.1	cog1524 cog4948 cog0481	3	1	0.1
cog1533 cog0645 cog0327,3,1,0.1	cog1533 cog0645 cog0327	3	1	0.1
cog1538 cog1432 cog0799,3,1,0.1	cog1538 cog1432 cog0799	3	1	0.1
cog1539 cog1124 cog0760,3,1,0.1	cog1539 cog1124 cog0760	3	1	0.1
cog1540 cog0266 cog0415,3,1,0.1	cog1540 cog0266 cog0415	3	1	0.1
cog1540 cog0406 cog0328,3,1,0.1	cog1540 cog0406 cog0328	3	1	0.1
cog1540 cog1579 cog0266,3,1,0.1	cog1540 cog1579 cog0266	3	1	0.1
cog1546 cog0563 cog1555,3,1,0.1	cog1546 cog0563 cog1555	3	1	0.1
cog1551 cog1947 cog0691,3,1,0.1	cog1551 cog1947 cog0691	3	1	0.1
cog1555 cog0558 cog0605,3,1,0.1	cog1555 cog0558 cog0605	3	1	0.1
cog1578 cog0210 cog0236,3,1,0.1	cog1578 cog0210 cog0236	3	1	0.1
cog1579 cog0245 cog1211,3,1,0.1	cog1579 cog0245 cog1211	3	1	0.1
cog1579 cog0266 cog1519,3,1,0.1	cog1579 cog0266 cog1519	3	1	0.1
cog1579 cog0406 cog0328,3,1,0.1	cog1579 cog0406 cog0328	3	1	0.1
cog1579 cog0526 cog0457,3,1,0.1	cog1579 cog0526 cog0457	3	1	0.1
cog1579 cog0568 cog0358,3,1,0.1	cog1579 cog0568 cog0358	3	1	0.1
cog1579 cog1144 cog1014,3,1,0.1	cog1579 cog1144 cog1014	3	1	0.1
cog1579 cog1519 cog0752,3,1,0.1	cog1579 cog1519 cog0752	3	1	0.1
cog1579 cog1897 cog1671,3,1,0.1	cog1579 cog1897 cog1671	3	1	0.1
cog1579 cog2049 cog1984,3,1,0.1	cog1579 cog2049 cog1984	3	1	0.1
cog1597 cog5002 cog0210,3,1,0.1	cog1597 cog5002 cog0210	3	1	0.1
cog1600 cog1378 cog0747,3,1,0.1	cog1600 cog1378 cog0747	3	1	0.1
cog1606 cog0601 cog0793,3,1,0.1	cog1606 cog0601 cog0793	3	1	0.1
cog1606 cog1194 cog1314,3,1,0.1	cog1606 cog1194 cog1314	3	1	0.1
cog1610 cog1546 cog0563,3,1,0.1	cog1610 cog1546 cog0563	3	1	0.1
cog1653 cog2971 cog0520,3,1,0.1	cog1653 cog2971 cog0520	3	1	0.1
cog1671 cog0428 cog0052,3,1,0.1	cog1671 cog0428 cog0052	3	1	0.1
cog1671 cog0428 cog0513,3,1,0.1	cog1671 cog0428 cog0513	3	1	0.1
cog1671 cog0428 cog1806,3,1,0.1	cog1671 cog0428 cog1806	3	1	0.1
cog1671 cog5124 cog0324,3,1,0.1	cog1671 cog5124 cog0324	3	1	0.1
cog1682 cog0271 cog2084,3,1,0.1	cog1682 cog0271 cog2084	3	1	0.1
[truncated: 1,102 more rows]

## Sheet: b.2
http://textalyser.net	COG0327 - COGs only
Raw Data
comma separated export	Keyword	Words	Uses	Uses (%)
protein,1,227,4.6	protein	1	227	4.6
predicted,1,135,2.7	predicted	1	135	2.7
uncharacterized,1,121,2.5	uncharacterized	1	121	2.5
conserved,1,102,2.1	conserved	1	102	2.1
subunit,1,73,1.5	subunit	1	73	1.5
related,1,73,1.5	related	1	73	1.5
abc-type,1,73,1.5	abc-type	1	73	1.5
transport,1,71,1.4	transport	1	71	1.4
system,1,63,1.3	system	1	63	1.3
component,1,65,1.3	component	1	65	1.3
dna,1,44,0.9	dna	1	44	0.9
atpase,1,44,0.9	atpase	1	44	0.9
membrane,1,37,0.8	membrane	1	37	0.8
superfamily,1,39,0.8	superfamily	1	39	0.8
proteins,1,33,0.7	proteins	1	33	0.7
permease,1,36,0.7	permease	1	36	0.7
bacteria,1,28,0.6	bacteria	1	28	0.6
domain,1,30,0.6	domain	1	30	0.6
synthetase,1,23,0.5	synthetase	1	23	0.5
transcriptional,1,24,0.5	transcriptional	1	24	0.5
kinase,1,24,0.5	kinase	1	24	0.5
hydrolase,1,25,0.5	hydrolase	1	25	0.5
synthase,1,25,0.5	synthase	1	25	0.5
involved,1,26,0.5	involved	1	26	0.5
regulator,1,18,0.4	regulator	1	18	0.4
dehydrogenase,1,19,0.4	dehydrogenase	1	19	0.4
systems,1,19,0.4	systems	1	19	0.4
acid,1,20,0.4	acid	1	20	0.4
enzymes,1,20,0.4	enzymes	1	20	0.4
superfamily),1,13,0.3	superfamily)	1	13	0.3
resistance,1,13,0.3	resistance	1	13	0.3
organic,1,13,0.3	organic	1	13	0.3
family,1,14,0.3	family	1	14	0.3
regulators,1,15,0.3	regulators	1	15	0.3
components,1,15,0.3	components	1	15	0.3
polymerase,1,16,0.3	polymerase	1	16	0.3
ribosomal,1,16,0.3	ribosomal	1	16	0.3
periplasmic,1,16,0.3	periplasmic	1	16	0.3
phosphate,1,16,0.3	phosphate	1	16	0.3
reductase,1,16,0.3	reductase	1	16	0.3
tetrahydromethanopterin,1,16,0.3	tetrahydromethanopterin	1	16	0.3
s-methyltransferase,1,16,0.3	s-methyltransferase	1	16	0.3
rna,1,17,0.3	rna	1	17	0.3
ferredoxin,1,17,0.3	ferredoxin	1	17	0.3
hydrolases,1,17,0.3	hydrolases	1	17	0.3
gtpase,1,10,0.2	gtpase	1	10	0.2
ii,1,10,0.2	ii	1	10	0.2
(contains,1,10,0.2	(contains	1	10	0.2
repeat,1,10,0.2	repeat	1	10	0.2
fe-s,1,10,0.2	fe-s	1	10	0.2
archaea,1,10,0.2	archaea	1	10	0.2
methyl,1,10,0.2	methyl	1	10	0.2
coenzyme,1,10,0.2	coenzyme	1	10	0.2
sam-dependent,1,11,0.2	sam-dependent	1	11	0.2
glycyl-trna,1,11,0.2	glycyl-trna	1	11	0.2
alpha,1,11,0.2	alpha	1	11	0.2
helicases,1,11,0.2	helicases	1	11	0.2
oxidoreductase,1,11,0.2	oxidoreductase	1	11	0.2
biosynthesis,1,11,0.2	biosynthesis	1	11	0.2
repair,1,12,0.2	repair	1	12	0.2
factor,1,12,0.2	factor	1	12	0.2
solvents,1,12,0.2	solvents	1	12	0.2
fog,1,12,0.2	fog	1	12	0.2
enzyme,1,12,0.2	enzyme	1	12	0.2
dna-directed,1,8,0.2	dna-directed	1	8	0.2
sigma,1,8,0.2	sigma	1	8	0.2
transferase,1,8,0.2	transferase	1	8	0.2
pyruvate,1,8,0.2	pyruvate	1	8	0.2
2-oxoacid,1,8,0.2	2-oxoacid	1	8	0.2
domain),1,8,0.2	domain)	1	8	0.2
ligase,1,8,0.2	ligase	1	8	0.2
transporters,1,8,0.2	transporters	1	8	0.2
chain,1,8,0.2	chain	1	8	0.2
zn-ribbon,1,9,0.2	zn-ribbon	1	9	0.2
possibly,1,9,0.2	possibly	1	9	0.2
nucleic,1,9,0.2	nucleic	1	9	0.2
acid-binding,1,9,0.2	acid-binding	1	9	0.2
glycosylase,1,9,0.2	glycosylase	1	9	0.2
putative,1,9,0.2	putative	1	9	0.2
endonuclease,1,9,0.2	endonuclease	1	9	0.2
multidrug,1,9,0.2	multidrug	1	9	0.2
beta,1,9,0.2	beta	1	9	0.2
amino,1,9,0.2	amino	1	9	0.2
oxidoreductases,1,9,0.2	oxidoreductases	1	9	0.2
dehydrogenases,1,9,0.2	dehydrogenases	1	9	0.2
rna-binding,1,9,0.2	rna-binding	1	9	0.2
dipeptide/oligopeptide/nickel,1,9,0.2	dipeptide/oligopeptide/nickel	1	9	0.2
permeases,1,9,0.2	permeases	1	9	0.2
lactam,1,3,0.1	lactam	1	3	0.1
fructose-2,1,3,0.1	fructose-2	1	3	0.1
6-bisphosphatase,1,3,0.1	6-bisphosphatase	1	3	0.1
glycine/d-amino,1,3,0.1	glycine/d-amino	1	3	0.1
oxidases,1,3,0.1	oxidases	1	3	0.1
(deaminating),1,3,0.1	(deaminating)	1	3	0.1
formamidopyrimidine-dna,1,3,0.1	formamidopyrimidine-dna	1	3	0.1
3-deoxy-d-manno-octulosonic-acid,1,3,0.1	3-deoxy-d-manno-octulosonic-acid	1	3	0.1
di-,1,3,0.1	di-	1	3	0.1
tripeptidases,1,3,0.1	tripeptidases	1	3	0.1
dtdp-glucose,1,3,0.1	dtdp-glucose	1	3	0.1
dtdp-4-dehydrorhamnose,1,3,0.1	dtdp-4-dehydrorhamnose	1	3	0.1
5-epimerase,1,3,0.1	5-epimerase	1	3	0.1
primosome,1,3,0.1	primosome	1	3	0.1
deoxyribodipyrimidine,1,3,0.1	deoxyribodipyrimidine	1	3	0.1
pyrrolidone-carboxylate,1,3,0.1	pyrrolidone-carboxylate	1	3	0.1
(n-terminal,1,3,0.1	(n-terminal	1	3	0.1
pyroglutamyl,1,3,0.1	pyroglutamyl	1	3	0.1
peptidase),1,3,0.1	peptidase)	1	3	0.1
dtdp-d-glucose,1,3,0.1	dtdp-d-glucose	1	3	0.1
6-dehydratase,1,3,0.1	6-dehydratase	1	3	0.1
nitroreductase,1,3,0.1	nitroreductase	1	3	0.1
prolipoprotein,1,3,0.1	prolipoprotein	1	3	0.1
diacylglyceryltransferase,1,3,0.1	diacylglyceryltransferase	1	3	0.1
phosphoribosylcarboxyaminoimidazole,1,3,0.1	phosphoribosylcarboxyaminoimidazole	1	3	0.1
(ncair),1,3,0.1	(ncair)	1	3	0.1
(dynamin-related),1,3,0.1	(dynamin-related)	1	3	0.1
adenine/guanine,1,3,0.1	adenine/guanine	1	3	0.1
phosphoribosyltransferases,1,3,0.1	phosphoribosyltransferases	1	3	0.1
prpp-binding,1,3,0.1	prpp-binding	1	3	0.1
l19,1,3,0.1	l19	1	3	0.1
divalent,1,3,0.1	divalent	1	3	0.1
heavy-metal,1,3,0.1	heavy-metal	1	3	0.1
cations,1,3,0.1	cations	1	3	0.1
pyrophosphatase/exopolyphosphatase,1,3,0.1	pyrophosphatase/exopolyphosphatase	1	3	0.1
penicillin,1,3,0.1	penicillin	1	3	0.1
n-terminal,1,3,0.1	n-terminal	1	3	0.1
rimm,1,3,0.1	rimm	1	3	0.1
16s,1,3,0.1	16s	1	3	0.1
rrna,1,3,0.1	rrna	1	3	0.1
processing,1,3,0.1	processing	1	3	0.1
branched-chain,1,3,0.1	branched-chain	1	3	0.1
thiamine,1,3,0.1	thiamine	1	3	0.1
hydroxymethylpyrimidine/phosphomethylpyrimidine,1,3,0.1	hydroxymethylpyrimidine/phosphomethylpyrimidine	1	3	0.1
trna-(guanine-n1)-methyltransferase,1,3,0.1	trna-(guanine-n1)-methyltransferase	1	3	0.1
auxiliary,1,3,0.1	auxiliary	1	3	0.1
s16,1,3,0.1	s16	1	3	0.1
stas,1,3,0.1	stas	1	3	0.1
dgtp,1,3,0.1	dgtp	1	3	0.1
triphosphohydrolase,1,3,0.1	triphosphohydrolase	1	3	0.1
atp,1,3,0.1	atp	1	3	0.1
pyrophosphatase,1,3,0.1	pyrophosphatase	1	3	0.1
rhodanese-related,1,3,0.1	rhodanese-related	1	3	0.1
sulfurtransferase,1,3,0.1	sulfurtransferase	1	3	0.1
kh,1,3,0.1	kh	1	3	0.1
mn/zn,1,3,0.1	mn/zn	1	3	0.1
mono-,1,3,0.1	mono-	1	3	0.1
diheme,1,3,0.1	diheme	1	3	0.1
variants,1,3,0.1	variants	1	3	0.1
pathway,1,3,0.1	pathway	1	3	0.1
stress-induced,1,3,0.1	stress-induced	1	3	0.1
morphogen,1,3,0.1	morphogen	1	3	0.1
(activity,1,3,0.1	(activity	1	3	0.1
unknown),1,3,0.1	unknown)	1	3	0.1
mn2+/zn2+,1,3,0.1	mn2+/zn2+	1	3	0.1
delta,1,3,0.1	delta	1	3	0.1
anthranilate/para-aminobenzoate,1,3,0.1	anthranilate/para-aminobenzoate	1	3	0.1
beta-lactamase,1,3,0.1	beta-lactamase	1	3	0.1
pyridoxal,1,3,0.1	pyridoxal	1	3	0.1
symporter,1,3,0.1	symporter	1	3	0.1
carboxylase,1,3,0.1	carboxylase	1	3	0.1
lysophospholipase,1,3,0.1	lysophospholipase	1	3	0.1
sulfoxide,1,3,0.1	sulfoxide	1	3	0.1
valyl-trna,1,3,0.1	valyl-trna	1	3	0.1
glutamine,1,3,0.1	glutamine	1	3	0.1
dipeptide,1,3,0.1	dipeptide	1	3	0.1
pathway),1,3,0.1	pathway)	1	3	0.1
protein),1,3,0.1	protein)	1	3	0.1
molecular,1,3,0.1	molecular	1	3	0.1
heat,1,3,0.1	heat	1	3	0.1
shock,1,3,0.1	shock	1	3	0.1
complex,1,3,0.1	complex	1	3	0.1
sh3,1,3,0.1	sh3	1	3	0.1
(had,1,3,0.1	(had	1	3	0.1
udp-glucose,1,3,0.1	udp-glucose	1	3	0.1
4-epimerase,1,3,0.1	4-epimerase	1	3	0.1
membrane-associated,1,3,0.1	membrane-associated	1	3	0.1
alpha/beta,1,3,0.1	alpha/beta	1	3	0.1
glycosyltransferases,1,3,0.1	glycosyltransferases	1	3	0.1
aminopeptidase,1,3,0.1	aminopeptidase	1	3	0.1
histidine,1,3,0.1	histidine	1	3	0.1
transduction,1,3,0.1	transduction	1	3	0.1
integral,1,3,0.1	integral	1	3	0.1
utilization,1,4,0.1	utilization	1	4	0.1
a/g-specific,1,4,0.1	a/g-specific	1	4	0.1
pyrophosphorylase,1,4,0.1	pyrophosphorylase	1	4	0.1
pseudouridylate,1,4,0.1	pseudouridylate	1	4	0.1
23s,1,4,0.1	23s	1	4	0.1
rna-specific,1,4,0.1	rna-specific	1	4	0.1
ii),1,4,0.1	ii)	1	4	0.1
photolyase,1,4,0.1	photolyase	1	4	0.1
recognition,1,4,0.1	recognition	1	4	0.1
particle,1,4,0.1	particle	1	4	0.1
mutase,1,4,0.1	mutase	1	4	0.1
pyrophosphohydrolases,1,4,0.1	pyrophosphohydrolases	1	4	0.1
oxidative,1,4,0.1	oxidative	1	4	0.1
damage,1,4,0.1	damage	1	4	0.1
endoiii-related,1,4,0.1	endoiii-related	1	4	0.1
segregation,1,4,0.1	segregation	1	4	0.1
gtpases,1,4,0.1	gtpases	1	4	0.1
tolerance,1,4,0.1	tolerance	1	4	0.1
elongation,1,4,0.1	elongation	1	4	0.1
exonuclease,1,4,0.1	exonuclease	1	4	0.1
udp-n-acetylglucosamine,1,4,0.1	udp-n-acetylglucosamine	1	4	0.1
enolpyruvyl,1,4,0.1	enolpyruvyl	1	4	0.1
fe2+/zn2+,1,4,0.1	fe2+/zn2+	1	4	0.1
regulation,1,4,0.1	regulation	1	4	0.1
required,1,4,0.1	required	1	4	0.1
factor),1,4,0.1	factor)	1	4	0.1
binding,1,4,0.1	binding	1	4	0.1
phosphatase,1,4,0.1	phosphatase	1	4	0.1
hth,1,4,0.1	hth	1	4	0.1
glutaredoxin,1,4,0.1	glutaredoxin	1	4	0.1
parvulin-like,1,4,0.1	parvulin-like	1	4	0.1
gamma,1,4,0.1	gamma	1	4	0.1
homolog,1,4,0.1	homolog	1	4	0.1
sugar,1,4,0.1	sugar	1	4	0.1
metal-binding,1,4,0.1	metal-binding	1	4	0.1
hd,1,4,0.1	hd	1	4	0.1
diadenosine,1,4,0.1	diadenosine	1	4	0.1
tetraphosphatase,1,4,0.1	tetraphosphatase	1	4	0.1
iii,1,4,0.1	iii	1	4	0.1
k+,1,4,0.1	k+	1	4	0.1
channel,1,4,0.1	channel	1	4	0.1
chey-like,1,4,0.1	chey-like	1	4	0.1
receiver,1,4,0.1	receiver	1	4	0.1
k+-transporting,1,4,0.1	k+-transporting	1	4	0.1
phosphotransferase,1,4,0.1	phosphotransferase	1	4	0.1
assembly,1,4,0.1	assembly	1	4	0.1
homologs,1,5,0.1	homologs	1	5	0.1
ribonuclease,1,5,0.1	ribonuclease	1	5	0.1
histidinol-phosphate/aromatic,1,5,0.1	histidinol-phosphate/aromatic	1	5	0.1
cobyric,1,5,0.1	cobyric	1	5	0.1
homoserine,1,5,0.1	homoserine	1	5	0.1
trans-succinylase,1,5,0.1	trans-succinylase	1	5	0.1
collagenase,1,5,0.1	collagenase	1	5	0.1
proteases,1,5,0.1	proteases	1	5	0.1
chromosome,1,5,0.1	chromosome	1	5	0.1
multimeric,1,5,0.1	multimeric	1	5	0.1
flavodoxin,1,5,0.1	flavodoxin	1	5	0.1
wrba,1,5,0.1	wrba	1	5	0.1
transporter,1,5,0.1	transporter	1	5	0.1
inorganic,1,5,0.1	inorganic	1	5	0.1
acetyltransferase,1,5,0.1	acetyltransferase	1	5	0.1
domains,1,5,0.1	domains	1	5	0.1
histidinol,1,5,0.1	histidinol	1	5	0.1
pp-loop,1,5,0.1	pp-loop	1	5	0.1
specificities,1,5,0.1	specificities	1	5	0.1
(related,1,5,0.1	(related	1	5	0.1
short-chain,1,5,0.1	short-chain	1	5	0.1
alcohol,1,5,0.1	alcohol	1	5	0.1
dehydrogenases),1,5,0.1	dehydrogenases)	1	5	0.1
methyltransferases,1,5,0.1	methyltransferases	1	5	0.1
response,1,5,0.1	response	1	5	0.1
cluster,1,5,0.1	cluster	1	5	0.1
phosphatases,1,5,0.1	phosphatases	1	5	0.1
(alpha/beta,1,5,0.1	(alpha/beta	1	5	0.1
peptide,1,5,0.1	peptide	1	5	0.1
chaperone,1,5,0.1	chaperone	1	5	0.1
eukaryotic,1,5,0.1	eukaryotic	1	5	0.1
methylase,1,5,0.1	methylase	1	5	0.1
serine/threonine,1,5,0.1	serine/threonine	1	5	0.1
methyltransferase,1,6,0.1	methyltransferase	1	6	0.1
allophanate,1,6,0.1	allophanate	1	6	0.1
primase,1,6,0.1	primase	1	6	0.1
(bacterial,1,6,0.1	(bacterial	1	6	0.1
type),1,6,0.1	type)	1	6	0.1
glycerol-3-phosphate,1,6,0.1	glycerol-3-phosphate	1	6	0.1
peptidase,1,6,0.1	peptidase	1	6	0.1
iv,1,6,0.1	iv	1	6	0.1
including,1,6,0.1	including	1	6	0.1
lipoprotein,1,6,0.1	lipoprotein	1	6	0.1
translation,1,6,0.1	translation	1	6	0.1
peptidyl-prolyl,1,6,0.1	peptidyl-prolyl	1	6	0.1
outer,1,6,0.1	outer	1	6	0.1
atp-dependent,1,6,0.1	atp-dependent	1	6	0.1
protease,1,6,0.1	protease	1	6	0.1
tpr,1,6,0.1	tpr	1	6	0.1
methionine,1,6,0.1	methionine	1	6	0.1
major,1,6,0.1	major	1	6	0.1
facilitator,1,6,0.1	facilitator	1	6	0.1
acyltransferases,1,6,0.1	acyltransferases	1	6	0.1
dna-binding,1,6,0.1	dna-binding	1	6	0.1
(sigma70/sigma32),1,7,0.1	(sigma70/sigma32)	1	7	0.1
synthases,1,7,0.1	synthases	1	7	0.1
aminotransferase,1,7,0.1	aminotransferase	1	7	0.1
decarboxylase,1,7,0.1	decarboxylase	1	7	0.1
signal,1,7,0.1	signal	1	7	0.1
ntp,1,7,0.1	ntp	1	7	0.1
atpases,1,7,0.1	atpases	1	7	0.1
uptake,1,7,0.1	uptake	1	7	0.1
lyase,1,7,0.1	lyase	1	7	0.1
isomerase,1,7,0.1	isomerase	1	7	0.1
phosphoribosyltransferase,1,7,0.1	phosphoribosyltransferase	1	7	0.1
cytochrome,1,7,0.1	cytochrome	1	7	0.1
type,1,7,0.1	type	1	7	0.1
zn-dependent,1,7,0.1	zn-dependent	1	7	0.1
cell,1,7,0.1	cell	1	7	0.1
component/surface,1,1,0.0	component/surface	1	1	0.0
dihydroneopterin,1,1,0.0	dihydroneopterin	1	1	0.0
aldolase,1,1,0.0	aldolase	1	1	0.0
partitioning,1,1,0.0	partitioning	1	1	0.0
output,1,1,0.0	output	1	1	0.0
pentose-5-phosphate-3-epimerase,1,1,0.0	pentose-5-phosphate-3-epimerase	1	1	0.0
cysteine,1,1,0.0	cysteine	1	1	0.0
sulfinate,1,1,0.0	sulfinate	1	1	0.0
desulfinase/cysteine,1,1,0.0	desulfinase/cysteine	1	1	0.0
desulfurase,1,1,0.0	desulfurase	1	1	0.0
na+/proline,1,1,0.0	na+/proline	1	1	0.0
a/acetone,1,1,0.0	a/acetone	1	1	0.0
(cobalamin-independent),1,1,0.0	(cobalamin-independent)	1	1	0.0
threonine,1,1,0.0	threonine	1	1	0.0
regulator/sugar,1,1,0.0	regulator/sugar	1	1	0.0
wd40,1,1,0.0	wd40	1	1	0.0
nifu,1,1,0.0	nifu	1	1	0.0
formation,1,1,0.0	formation	1	1	0.0
signal-transduction,1,1,0.0	signal-transduction	1	1	0.0
camp-binding,1,1,0.0	camp-binding	1	1	0.0
b/acetone,1,1,0.0	b/acetone	1	1	0.0
serine,1,1,0.0	serine	1	1	0.0
inhibitor,1,1,0.0	inhibitor	1	1	0.0
alpha-galactosidases/6-phospho-beta-glucosidases,1,1,0.0	alpha-galactosidases/6-phospho-beta-glucosidases	1	1	0.0
exoribonuclease,1,1,0.0	exoribonuclease	1	1	0.0
n-acetylglucosamine,1,1,0.0	n-acetylglucosamine	1	1	0.0
selenocysteine,1,1,0.0	selenocysteine	1	1	0.0
thiol-disulfide,1,1,0.0	thiol-disulfide	1	1	0.0
thioredoxins,1,1,0.0	thioredoxins	1	1	0.0
6-phosphofructokinase,1,1,0.0	6-phosphofructokinase	1	1	0.0
aspartyl-trna,1,1,0.0	aspartyl-trna	1	1	0.0
spermidine/putrescine,1,1,0.0	spermidine/putrescine	1	1	0.0
cycle,1,1,0.0	cycle	1	1	0.0
control,1,1,0.0	control	1	1	0.0
phenylalanyl-trna,1,1,0.0	phenylalanyl-trna	1	1	0.0
phosphoribosylaminoimidazolesuccinocarboxamide,1,1,0.0	phosphoribosylaminoimidazolesuccinocarboxamide	1	1	0.0
(saicar),1,1,0.0	(saicar)	1	1	0.0
excinuclease,1,1,0.0	excinuclease	1	1	0.0
s1,1,1,0.0	s1	1	1	0.0
lmbe,1,1,0.0	lmbe	1	1	0.0
von,1,1,0.0	von	1	1	0.0
willebrand,1,1,0.0	willebrand	1	1	0.0
(vwa),1,1,0.0	(vwa)	1	1	0.0
aspartate/tyrosine/aromatic,1,1,0.0	aspartate/tyrosine/aromatic	1	1	0.0
oligoendopeptidase,1,1,0.0	oligoendopeptidase	1	1	0.0
cyclotransferase,1,1,0.0	cyclotransferase	1	1	0.0
udp-n-acetylmuramyl,1,1,0.0	udp-n-acetylmuramyl	1	1	0.0
tripeptide,1,1,0.0	tripeptide	1	1	0.0
ketosteroid,1,1,0.0	ketosteroid	1	1	0.0
isomerase-related,1,1,0.0	isomerase-related	1	1	0.0
thih,1,1,0.0	thih	1	1	0.0
6-phosphogluconate,1,1,0.0	6-phosphogluconate	1	1	0.0
serine-pyruvate,1,1,0.0	serine-pyruvate	1	1	0.0
aminotransferase/archaeal,1,1,0.0	aminotransferase/archaeal	1	1	0.0
aspartate,1,1,0.0	aspartate	1	1	0.0
solute-binding,1,1,0.0	solute-binding	1	1	0.0
glucoamylase,1,1,0.0	glucoamylase	1	1	0.0
glucose-6-p,1,1,0.0	glucose-6-p	1	1	0.0
6-phosphogluconolactonase/glucosamine-6-phosphate,1,1,0.0	6-phosphogluconolactonase/glucosamine-6-phosphate	1	1	0.0
isomerase/deaminase,1,1,0.0	isomerase/deaminase	1	1	0.0
glucose-6-phosphate,1,1,0.0	glucose-6-phosphate	1	1	0.0
1-dehydrogenase,1,1,0.0	1-dehydrogenase	1	1	0.0
oligopeptide,1,1,0.0	oligopeptide	1	1	0.0
glycine,1,1,0.0	glycine	1	1	0.0
betaine/choline-binding,1,1,0.0	betaine/choline-binding	1	1	0.0
(lipo)protein,1,1,0.0	(lipo)protein	1	1	0.0
(osmoprotectant,1,1,0.0	(osmoprotectant	1	1	0.0
dnaj-class,1,1,0.0	dnaj-class	1	1	0.0
c-terminal,1,1,0.0	c-terminal	1	1	0.0
zn,1,1,0.0	zn	1	1	0.0
finger,1,1,0.0	finger	1	1	0.0
aspartokinases,1,1,0.0	aspartokinases	1	1	0.0
starvation-inducible,1,1,0.0	starvation-inducible	1	1	0.0
phoh,1,1,0.0	phoh	1	1	0.0
gene,1,1,0.0	gene	1	1	0.0
(muts,1,1,0.0	(muts	1	1	0.0
family),1,1,0.0	family)	1	1	0.0
nucleoside-diphosphate-sugar,1,1,0.0	nucleoside-diphosphate-sugar	1	1	0.0
epimerases,1,1,0.0	epimerases	1	1	0.0
nucleotide-utilizing,1,1,0.0	nucleotide-utilizing	1	1	0.0
molybdopterin-biosynthesis,1,1,0.0	molybdopterin-biosynthesis	1	1	0.0
moea,1,1,0.0	moea	1	1	0.0
pyruvate/2-oxoglutarate,1,1,0.0	pyruvate/2-oxoglutarate	1	1	0.0
dihydrolipoamide,1,1,0.0	dihydrolipoamide	1	1	0.0
(e3),1,1,0.0	(e3)	1	1	0.0
(metallo-beta-lactamase,1,1,0.0	(metallo-beta-lactamase	1	1	0.0
adp-ribose,1,1,0.0	adp-ribose	1	1	0.0
lyase-activating,1,1,0.0	lyase-activating	1	1	0.0
acetyl-coa,1,1,0.0	acetyl-coa	1	1	0.0
grpe,1,1,0.0	grpe	1	1	0.0
(heat,1,1,0.0	(heat	1	1	0.0
deoxycytidylate,1,1,0.0	deoxycytidylate	1	1	0.0
sortase,1,1,0.0	sortase	1	1	0.0
responsive,1,1,0.0	responsive	1	1	0.0
(mrna-binding),1,1,0.0	(mrna-binding)	1	1	0.0
(competence-,1,1,0.0	(competence-	1	1	0.0
mitomycin-induced),1,1,0.0	mitomycin-induced)	1	1	0.0
adenylate,1,1,0.0	adenylate	1	1	0.0
kinases,1,1,0.0	kinases	1	1	0.0
phosphatidylglycerophosphate,1,1,0.0	phosphatidylglycerophosphate	1	1	0.0
l11,1,1,0.0	l11	1	1	0.0
metallo-beta-lactamase,1,1,0.0	metallo-beta-lactamase	1	1	0.0
udp-n-acetylmuramate,1,1,0.0	udp-n-acetylmuramate	1	1	0.0
s20,1,1,0.0	s20	1	1	0.0
deoxyxylulose,1,1,0.0	deoxyxylulose	1	1	0.0
isoprenoid,1,1,0.0	isoprenoid	1	1	0.0
s21,1,1,0.0	s21	1	1	0.0
abc,1,1,0.0	abc	1	1	0.0
duplicated,1,1,0.0	duplicated	1	1	0.0
glycopeptide,1,1,0.0	glycopeptide	1	1	0.0
antibiotics,1,1,0.0	antibiotics	1	1	0.0
ftsi/penicillin-binding,1,1,0.0	ftsi/penicillin-binding	1	1	0.0
(azaleucine,1,1,0.0	(azaleucine	1	1	0.0
resistance),1,1,0.0	resistance)	1	1	0.0
dihydrodipicolinate,1,1,0.0	dihydrodipicolinate	1	1	0.0
synthase/n-acetylneuraminate,1,1,0.0	synthase/n-acetylneuraminate	1	1	0.0
3-hydroxy-3-methylglutaryl,1,1,0.0	3-hydroxy-3-methylglutaryl	1	1	0.0
coa,1,1,0.0	coa	1	1	0.0
mn2+,1,1,0.0	mn2+	1	1	0.0
fe2+,1,1,0.0	fe2+	1	1	0.0
nramp,1,1,0.0	nramp	1	1	0.0
reca/rada,1,1,0.0	reca/rada	1	1	0.0
recombinase,1,1,0.0	recombinase	1	1	0.0
coproporphyrinogen,1,1,0.0	coproporphyrinogen	1	1	0.0
oxidase,1,1,0.0	oxidase	1	1	0.0
aspartate-semialdehyde,1,1,0.0	aspartate-semialdehyde	1	1	0.0
cytidine,1,1,0.0	cytidine	1	1	0.0
(predicted,1,1,0.0	(predicted	1	1	0.0
atpase),1,1,0.0	atpase)	1	1	0.0
aldo/keto,1,1,0.0	aldo/keto	1	1	0.0
reductases,1,1,0.0	reductases	1	1	0.0
diketogulonate,1,1,0.0	diketogulonate	1	1	0.0
induction,1,1,0.0	induction	1	1	0.0
arylsulfatase,1,1,0.0	arylsulfatase	1	1	0.0
(fe-s,1,1,0.0	(fe-s	1	1	0.0
oxidoreductase),1,1,0.0	oxidoreductase)	1	1	0.0
enterochelin,1,1,0.0	enterochelin	1	1	0.0
esterase,1,1,0.0	esterase	1	1	0.0
morphogenesis,1,1,0.0	morphogenesis	1	1	0.0
signaling,1,1,0.0	signaling	1	1	0.0
preprotein,1,1,0.0	preprotein	1	1	0.0
translocase,1,1,0.0	translocase	1	1	0.0
secg,1,1,0.0	secg	1	1	0.0
cobyrinic,1,1,0.0	cobyrinic	1	1	0.0
c-diamide,1,1,0.0	c-diamide	1	1	0.0
propanediol,1,1,0.0	propanediol	1	1	0.0
(includes,1,1,0.0	(includes	1	1	0.0
coumermycin,1,1,0.0	coumermycin	1	1	0.0
biosynthetic,1,1,0.0	biosynthetic	1	1	0.0
specialized,1,1,0.0	specialized	1	1	0.0
leucyl,1,1,0.0	leucyl	1	1	0.0
(aminopeptidase,1,1,0.0	(aminopeptidase	1	1	0.0
t),1,1,0.0	t)	1	1	0.0
fha,1,1,0.0	fha	1	1	0.0
phosphomannomutase,1,1,0.0	phosphomannomutase	1	1	0.0
acetylglutamate,1,1,0.0	acetylglutamate	1	1	0.0
dutpase,1,1,0.0	dutpase	1	1	0.0
lactate,1,1,0.0	lactate	1	1	0.0
2-keto-4-pentenoate,1,1,0.0	2-keto-4-pentenoate	1	1	0.0
hydratase/2-oxohepta-3-ene-1,1,1,0.0	hydratase/2-oxohepta-3-ene-1	1	1	0.0
7-dioic,1,1,0.0	7-dioic	1	1	0.0
hydratase,1,1,0.0	hydratase	1	1	0.0
(catechol,1,1,0.0	(catechol	1	1	0.0
transposase,1,1,0.0	transposase	1	1	0.0
inactivated,1,1,0.0	inactivated	1	1	0.0
derivatives,1,1,0.0	derivatives	1	1	0.0
is5,1,1,0.0	is5	1	1	0.0
ribosome-associated,1,1,0.0	ribosome-associated	1	1	0.0
recycling,1,1,0.0	recycling	1	1	0.0
50s,1,1,0.0	50s	1	1	0.0
(s4,1,1,0.0	(s4	1	1	0.0
paralog),1,1,0.0	paralog)	1	1	0.0
nicotinate-nucleotide,1,1,0.0	nicotinate-nucleotide	1	1	0.0
shape-determining,1,1,0.0	shape-determining	1	1	0.0
phosphoenolpyruvate,1,1,0.0	phosphoenolpyruvate	1	1	0.0
membrane-bound,1,1,0.0	membrane-bound	1	1	0.0
lytic,1,1,0.0	lytic	1	1	0.0
murein,1,1,0.0	murein	1	1	0.0
transglycosylase,1,1,0.0	transglycosylase	1	1	0.0
pseudouridine,1,1,0.0	pseudouridine	1	1	0.0
carbon,1,1,0.0	carbon	1	1	0.0
storage,1,1,0.0	storage	1	1	0.0
(could,1,1,0.0	(could	1	1	0.0
regulate,1,1,0.0	regulate	1	1	0.0
swarming,1,1,0.0	swarming	1	1	0.0
quorum,1,1,0.0	quorum	1	1	0.0
sensing),1,1,0.0	sensing)	1	1	0.0
4-diphosphocytidyl-2c-methyl-d-erythritol,1,1,0.0	4-diphosphocytidyl-2c-methyl-d-erythritol	1	1	0.0
2-phosphate,1,1,0.0	2-phosphate	1	1	0.0
tmrna-binding,1,1,0.0	tmrna-binding	1	1	0.0
3-deoxy-d-arabino-heptulosonate,1,1,0.0	3-deoxy-d-arabino-heptulosonate	1	1	0.0
7-phosphate,1,1,0.0	7-phosphate	1	1	0.0
(dahp),1,1,0.0	(dahp)	1	1	0.0
plant,1,1,0.0	plant	1	1	0.0
iojap,1,1,0.0	iojap	1	1	0.0
silver,1,1,0.0	silver	1	1	0.0
efflux,1,1,0.0	efflux	1	1	0.0
pump,1,1,0.0	pump	1	1	0.0
nicotinic,1,1,0.0	nicotinic	1	1	0.0
mononucleotide,1,1,0.0	mononucleotide	1	1	0.0
adenylyltransferase,1,1,0.0	adenylyltransferase	1	1	0.0
ankyrin,1,1,0.0	ankyrin	1	1	0.0
copg/arc/metj,1,1,0.0	copg/arc/metj	1	1	0.0
arsenate,1,1,0.0	arsenate	1	1	0.0
delta(2)-isopentenylpyrophosphate,1,1,0.0	delta(2)-isopentenylpyrophosphate	1	1	0.0
double-stranded,1,1,0.0	double-stranded	1	1	0.0
beta-helix,1,1,0.0	beta-helix	1	1	0.0
membrane-fusion,1,1,0.0	membrane-fusion	1	1	0.0
flagellar,1,1,0.0	flagellar	1	1	0.0
basal-body,1,1,0.0	basal-body	1	1	0.0
p-ring,1,1,0.0	p-ring	1	1	0.0
uri,1,1,0.0	uri	1	1	0.0
nad/fad-dependent,1,1,0.0	nad/fad-dependent	1	1	0.0
phosphoglucomutase,1,1,0.0	phosphoglucomutase	1	1	0.0
stomatin/prohibitin,1,1,0.0	stomatin/prohibitin	1	1	0.0
sphingosine,1,1,0.0	sphingosine	1	1	0.0
nucleotidyltransferase/poly(a),1,1,0.0	nucleotidyltransferase/poly(a)	1	1	0.0
export,1,1,0.0	export	1	1	0.0
3-hydroxyisobutyrate,1,1,0.0	3-hydroxyisobutyrate	1	1	0.0
beta-hydroxyacid,1,1,0.0	beta-hydroxyacid	1	1	0.0
virulence,1,1,0.0	virulence	1	1	0.0
10-methylenetetrahydrofolate,1,1,0.0	10-methylenetetrahydrofolate	1	1	0.0
udp-galactopyranose,1,1,0.0	udp-galactopyranose	1	1	0.0
solvent,1,1,0.0	solvent	1	1	0.0
osta,1,1,0.0	osta	1	1	0.0
n-acetylglucosamine-6-phosphate,1,1,0.0	n-acetylglucosamine-6-phosphate	1	1	0.0
deacetylase,1,1,0.0	deacetylase	1	1	0.0
methyl-accepting,1,1,0.0	methyl-accepting	1	1	0.0
chemotaxis,1,1,0.0	chemotaxis	1	1	0.0
flavoproteins,1,1,0.0	flavoproteins	1	1	0.0
bacteriocin/lantibiotic,1,1,0.0	bacteriocin/lantibiotic	1	1	0.0
exporters,1,1,0.0	exporters	1	1	0.0
double-glycine,1,1,0.0	double-glycine	1	1	0.0
thioredoxin-like,1,1,0.0	thioredoxin-like	1	1	0.0
tyrosyl-trna,1,1,0.0	tyrosyl-trna	1	1	0.0
helicase,1,1,0.0	helicase	1	1	0.0
intracellular,1,1,0.0	intracellular	1	1	0.0
protease/amidase,1,1,0.0	protease/amidase	1	1	0.0
hd-gyp,1,1,0.0	hd-gyp	1	1	0.0
lysm,1,1,0.0	lysm	1	1	0.0
(class,1,2,0.0	(class	1	2	0.0
s2,1,2,0.0	s2	1	2	0.0
ts,1,2,0.0	ts	1	2	0.0
-3,1,2,0.0	-3	1	2	0.0
(including,1,2,0.0	(including	1	2	0.0
poli),1,2,0.0	poli)	1	2	0.0
(isoleucine,1,2,0.0	(isoleucine	1	2	0.0
patch,1,2,0.0	patch	1	2	0.0
thymidylate,1,2,0.0	thymidylate	1	2	0.0
-,1,2,0.0	-	1	2	0.0
-5,1,2,0.0	-5	1	2	0.0
aminotransferase/4-amino-4-deoxychorismate,1,2,0.0	aminotransferase/4-amino-4-deoxychorismate	1	2	0.0
fkbp-type,1,2,0.0	fkbp-type	1	2	0.0
cis-trans,1,2,0.0	cis-trans	1	2	0.0
(trigger,1,2,0.0	(trigger	1	2	0.0
monophosphate,1,2,0.0	monophosphate	1	2	0.0
fe-s-cluster,1,2,0.0	fe-s-cluster	1	2	0.0
6-pyruvoyl-tetrahydropterin,1,2,0.0	6-pyruvoyl-tetrahydropterin	1	2	0.0
molybdopterin-guanine,1,2,0.0	molybdopterin-guanine	1	2	0.0
dinucleotide,1,2,0.0	dinucleotide	1	2	0.0
php,1,2,0.0	php	1	2	0.0
8-dihydro-6-hydroxymethylpterin-pyrophosphokinase,1,2,0.0	8-dihydro-6-hydroxymethylpterin-pyrophosphokinase	1	2	0.0
antitoxin,1,2,0.0	antitoxin	1	2	0.0
toxin-antitoxin,1,2,0.0	toxin-antitoxin	1	2	0.0
stability,1,2,0.0	stability	1	2	0.0
secretory,1,2,0.0	secretory	1	2	0.0
pullulanase,1,2,0.0	pullulanase	1	2	0.0
pula,1,2,0.0	pula	1	2	0.0
glycosidases,1,2,0.0	glycosidases	1	2	0.0
(sua5),1,2,0.0	(sua5)	1	2	0.0
cystathionine,1,2,0.0	cystathionine	1	2	0.0
beta-lyases/cystathionine,1,2,0.0	beta-lyases/cystathionine	1	2	0.0
gamma-synthases,1,2,0.0	gamma-synthases	1	2	0.0
d-mannonate,1,2,0.0	d-mannonate	1	2	0.0
dehydratase,1,2,0.0	dehydratase	1	2	0.0
(unclassified),1,2,0.0	(unclassified)	1	2	0.0
lon,1,2,0.0	lon	1	2	0.0
bacterial,1,2,0.0	bacterial	1	2	0.0
orotate,1,2,0.0	orotate	1	2	0.0
fold,1,2,0.0	fold	1	2	0.0
antiterminator,1,2,0.0	antiterminator	1	2	0.0
phosphopantothenoylcysteine,1,2,0.0	phosphopantothenoylcysteine	1	2	0.0
synthetase/decarboxylase,1,2,0.0	synthetase/decarboxylase	1	2	0.0
n-methylhydantoinase,1,2,0.0	n-methylhydantoinase	1	2	0.0
lactoylglutathione,1,2,0.0	lactoylglutathione	1	2	0.0
lyases,1,2,0.0	lyases	1	2	0.0
cbs,1,2,0.0	cbs	1	2	0.0
glycosyl,1,2,0.0	glycosyl	1	2	0.0
metalloendopeptidases,1,2,0.0	metalloendopeptidases	1	2	0.0
implicated,1,2,0.0	implicated	1	2	0.0
peptidases,1,2,0.0	peptidases	1	2	0.0
threonyl-trna,1,2,0.0	threonyl-trna	1	2	0.0
activity,1,2,0.0	activity	1	2	0.0
atp-binding,1,2,0.0	atp-binding	1	2	0.0
uridine,1,2,0.0	uridine	1	2	0.0
homologous,1,2,0.0	homologous	1	2	0.0
snrnp,1,2,0.0	snrnp	1	2	0.0
proline/glycine,1,2,0.0	proline/glycine	1	2	0.0
betaine,1,2,0.0	betaine	1	2	0.0
l1,1,2,0.0	l1	1	2	0.0
esterases,1,2,0.0	esterases	1	2	0.0
unusual,1,2,0.0	unusual	1	2	0.0
recombinational,1,2,0.0	recombinational	1	2	0.0
(recf,1,2,0.0	(recf	1	2	0.0
ap,1,2,0.0	ap	1	2	0.0
nad-dependent,1,2,0.0	nad-dependent	1	2	0.0
brct,1,2,0.0	brct	1	2	0.0
lepa,1,2,0.0	lepa	1	2	0.0
protein/domain,1,2,0.0	protein/domain	1	2	0.0
typically,1,2,0.0	typically	1	2	0.0
flavoprotein,1,2,0.0	flavoprotein	1	2	0.0
oxygenases,1,2,0.0	oxygenases	1	2	0.0
dim6/ntab,1,2,0.0	dim6/ntab	1	2	0.0
alkylation,1,2,0.0	alkylation	1	2	0.0
metal-dependent,1,2,0.0	metal-dependent	1	2	0.0
pyruvate-formate,1,2,0.0	pyruvate-formate	1	2	0.0
mismatch,1,2,0.0	mismatch	1	2	0.0
histone,1,2,0.0	histone	1	2	0.0
hpa2,1,2,0.0	hpa2	1	2	0.0
acetyltransferases,1,2,0.0	acetyltransferases	1	2	0.0
2-succinyl-6-hydroxy-2,1,2,0.0	2-succinyl-6-hydroxy-2	1	2	0.0
4-cyclohexadiene-1-carboxylate,1,2,0.0	4-cyclohexadiene-1-carboxylate	1	2	0.0
dna/rna,1,2,0.0	dna/rna	1	2	0.0
snf2,1,2,0.0	snf2	1	2	0.0
isochorismate,1,2,0.0	isochorismate	1	2	0.0
hd-superfamily,1,2,0.0	hd-superfamily	1	2	0.0
l-alanine-dl-glutamate,1,2,0.0	l-alanine-dl-glutamate	1	2	0.0
epimerase,1,2,0.0	epimerase	1	2	0.0
enolase,1,2,0.0	enolase	1	2	0.0
deaminase,1,2,0.0	deaminase	1	2	0.0
imidazolonepropionase,1,2,0.0	imidazolonepropionase	1	2	0.0
amidohydrolases,1,2,0.0	amidohydrolases	1	2	0.0
superoxide,1,2,0.0	superoxide	1	2	0.0
dismutase,1,2,0.0	dismutase	1	2	0.0
atp-utilizing,1,2,0.0	atp-utilizing	1	2	0.0
peroxiredoxin,1,2,0.0	peroxiredoxin	1	2	0.0
diacylglycerol,1,2,0.0	diacylglycerol	1	2	0.0
3-methyladenine,1,2,0.0	3-methyladenine	1	2	0.0
na+/melibiose,1,2,0.0	na+/melibiose	1	2	0.0
division,1,2,0.0	division	1	2	0.0
n6-adenine-specific,1,2,0.0	n6-adenine-specific	1	2	0.0
(family,1,2,0.0	(family	1	2	0.0
x),1,2,0.0	x)	1	2	0.0
wall,1,2,0.0	wall	1	2	0.0
biogenesis,1,2,0.0	biogenesis	1	2	0.0
bola,1,2,0.0	bola	1	2	0.0
anti-anti-sigma,1,2,0.0	anti-anti-sigma	1	2	0.0
regulatory,1,2,0.0	regulatory	1	2	0.0
(antagonist,1,2,0.0	(antagonist	1	2	0.0
anti-sigma,1,2,0.0	anti-sigma	1	2	0.0
o-acetylhomoserine,1,2,0.0	o-acetylhomoserine	1	2	0.0
sulfhydrylase,1,2,0.0	sulfhydrylase	1	2	0.0
glyoxylases,1,2,0.0	glyoxylases	1	2	0.0
acyl,1,2,0.0	acyl	1	2	0.0
carrier,1,2,0.0	carrier	1	2	0.0
glutathione,1,2,0.0	glutathione	1	2	0.0
s-transferase,1,2,0.0	s-transferase	1	2	0.0
2c-methyl-d-erythritol,1,2,0.0	2c-methyl-d-erythritol	1	2	0.0
4-cyclodiphosphate,1,2,0.0	4-cyclodiphosphate	1	2	0.0
bc,1,2,0.0	bc	1	2	0.0
rieske,1,2,0.0	rieske	1	2	0.0
c1,1,2,0.0	c1	1	2	0.0
high-affinity,1,2,0.0	high-affinity	1	2	0.0
osmosensitive,1,2,0.0	osmosensitive	1	2	0.0
integrase,1,2,0.0	integrase	1	2	0.0
antimicrobial,1,2,0.0	antimicrobial	1	2	0.0
l13,1,2,0.0	l13	1	2	0.0
s9,1,2,0.0	s9	1	2	0.0
arginine/lysine/ornithine,1,2,0.0	arginine/lysine/ornithine	1	2	0.0
decarboxylases,1,2,0.0	decarboxylases	1	2	0.0
dipeptide/tripeptide,1,2,0.0	dipeptide/tripeptide	1	2	0.0
glutamyl-,1,2,0.0	glutamyl-	1	2	0.0
glutaminyl-trna,1,2,0.0	glutaminyl-trna	1	2	0.0
synthetases,1,2,0.0	synthetases	1	2	0.0
mannose/fructose-specific,1,2,0.0	mannose/fructose-specific	1	2	0.0
iia,1,2,0.0	iia	1	2	0.0
hpr-related,1,2,0.0	hpr-related	1	2	0.0
meiotic,1,2,0.0	meiotic	1	2	0.0
recombination,1,2,0.0	recombination	1	2	0.0
phosphoenolpyruvate-protein,1,2,0.0	phosphoenolpyruvate-protein	1	2	0.0
(pts,1,2,0.0	(pts	1	2	0.0
ei,1,2,0.0	ei	1	2	0.0
bacteria),1,2,0.0	bacteria)	1	2	0.0
flavin-nucleotide-binding,1,2,0.0	flavin-nucleotide-binding	1	2	0.0
hypoxanthine-guanine,1,2,0.0	hypoxanthine-guanine	1	2	0.0
4-diphosphocytidyl-2-methyl-d-erithritol,1,2,0.0	4-diphosphocytidyl-2-methyl-d-erithritol	1	2	0.0
cysteinyl-trna,1,2,0.0	cysteinyl-trna	1	2	0.0
stringent,1,2,0.0	stringent	1	2	0.0
starvation,1,2,0.0	starvation	1	2	0.0
consisting,1,2,0.0	consisting	1	2	0.0
winged-helix,1,2,0.0	winged-helix	1	2	0.0
low-affinity,1,2,0.0	low-affinity	1	2	0.0
camp,1,2,0.0	camp	1	2	0.0
phosphodiesterase,1,2,0.0	phosphodiesterase	1	2	0.0
trna,1,2,0.0	trna	1	2	0.0
subunits,1,2,0.0	subunits	1	2	0.0
polysaccharide/polyol,1,2,0.0	polysaccharide/polyol	1	2	0.0
glycosyltransferase,1,2,0.0	glycosyltransferase	1	2	0.0
polypeptide,1,2,0.0	polypeptide	1	2	0.0
release,1,2,0.0	release	1	2	0.0
factors,1,2,0.0	factors	1	2	0.0
pua,1,2,0.0	pua	1	2	0.0
biotin,1,2,0.0	biotin	1	2	0.0
dinucleotide-utilizing,1,2,0.0	dinucleotide-utilizing	1	2	0.0
thif/hesa,1,2,0.0	thif/hesa	1	2	0.0
alanyl-trna,1,2,0.0	alanyl-trna	1	2	0.0
(aaa+,1,2,0.0	(aaa+	1	2	0.0
h2-forming,1,2,0.0	h2-forming	1	2	0.0
n5,1,2,0.0	n5	1	2	0.0
n10-methylenetetrahydromethanopterin,1,2,0.0	n10-methylenetetrahydromethanopterin	1	2	0.0
arginase/agmatinase/formimionoglutamate,1,2,0.0	arginase/agmatinase/formimionoglutamate	1	2	0.0
arginase,1,2,0.0	arginase	1	2	0.0
deoxyhypusine,1,2,0.0	deoxyhypusine	1	2	0.0
(ef-p)/translation,1,2,0.0	(ef-p)/translation	1	2	0.0
initiation,1,2,0.0	initiation	1	2	0.0
5a,1,2,0.0	5a	1	2	0.0
(eif-5a),1,2,0.0	(eif-5a)	1	2	0.0
phospholipid,1,2,0.0	phospholipid	1	2	0.0
tram,1,2,0.0	tram	1	2	0.0
glutamate,1,2,0.0	glutamate	1	2	0.0
plp-dependent,1,2,0.0	plp-dependent	1	2	0.0
amidotransferase,1,2,0.0	amidotransferase	1	2	0.0
pyridoxine,1,2,0.0	pyridoxine	1	2	0.0
universal,1,2,0.0	universal	1	2	0.0
stress,1,2,0.0	stress	1	2	0.0
uspa,1,2,0.0	uspa	1	2	0.0
nucleotide-binding,1,2,0.0	nucleotide-binding	1	2	0.0
cytidylyltransferase,1,2,0.0	cytidylyltransferase	1	2	0.0
large-conductance,1,2,0.0	large-conductance	1	2	0.0
mechanosensitive,1,2,0.0	mechanosensitive	1	2	0.0
nitrogenase,1,2,0.0	nitrogenase	1	2	0.0
nifh,1,2,0.0	nifh	1	2	0.0
(atpase),1,2,0.0	(atpase)	1	2	0.0
queuine/archaeosine,1,2,0.0	queuine/archaeosine	1	2	0.0
trna-ribosyltransferase,1,2,0.0	trna-ribosyltransferase	1	2	0.0
molybdenum,1,2,0.0	molybdenum	1	2	0.0
cofactor,1,2,0.0	cofactor	1	2	0.0
phosphoesterase,1,2,0.0	phosphoesterase	1	2	0.0
transport/signal,1,2,0.0	transport/signal	1	2	0.0
component/domain,1,2,0.0	component/domain	1	2	0.0
peptidylarginine,1,2,0.0	peptidylarginine	1	2	0.0
deiminase,1,2,0.0	deiminase	1	2	0.0
amidohydrolase,1,2,0.0	amidohydrolase	1	2	0.0
lysine,1,2,0.0	lysine	1	2	0.0
3-aminomutase,1,2,0.0	3-aminomutase	1	2	0.0
drug/metabolite,1,2,0.0	drug/metabolite	1	2	0.0
(dmt),1,2,0.0	(dmt)	1	2	0.0
gtp,1,2,0.0	gtp	1	2	0.0
adenosylcobinamide-phosphate,1,2,0.0	adenosylcobinamide-phosphate	1	2	0.0
guanylyltransferase,1,2,0.0	guanylyltransferase	1	2	0.0
topoisomerase,1,2,0.0	topoisomerase	1	2	0.0
vi,1,2,0.0	vi	1	2	0.0
uncharacterized conserved,2,62,1.3	uncharacterized conserved	2	62	1.3
conserved protein,2,62,1.3	conserved protein	2	62	1.3
transport system,2,55,1.1	transport system	2	55	1.1
protein conserved,2,38,0.8	protein conserved	2	38	0.8
uncharacterized protein,2,40,0.8	uncharacterized protein	2	40	0.8
membrane protein,2,28,0.6	membrane protein	2	28	0.6
conserved bacteria,2,28,0.6	conserved bacteria	2	28	0.6
atpase component,2,23,0.5	atpase component	2	23	0.5
protein predicted,2,24,0.5	protein predicted	2	24	0.5
permease component,2,19,0.4	permease component	2	19	0.4
system atpase,2,19,0.4	system atpase	2	19	0.4
abc-type transport,2,19,0.4	abc-type transport	2	19	0.4
predicted membrane,2,21,0.4	predicted membrane	2	21	0.4
transcriptional regulators,2,13,0.3	transcriptional regulators	2	13	0.3
predicted transcriptional,2,15,0.3	predicted transcriptional	2	15	0.3
protein uncharacterized,2,15,0.3	protein uncharacterized	2	15	0.3
ribosomal protein,2,16,0.3	ribosomal protein	2	16	0.3
system involved,2,16,0.3	system involved	2	16	0.3
transport systems,2,16,0.3	transport systems	2	16	0.3
tetrahydromethanopterin s-methyltransferase,2,16,0.3	tetrahydromethanopterin s-methyltransferase	2	16	0.3
s-methyltransferase subunit,2,16,0.3	s-methyltransferase subunit	2	16	0.3
transcriptional regulator,2,10,0.2	transcriptional regulator	2	10	0.2
conserved archaea,2,10,0.2	conserved archaea	2	10	0.2
methyl coenzyme,2,10,0.2	methyl coenzyme	2	10	0.2
coenzyme reductase,2,10,0.2	coenzyme reductase	2	10	0.2
glycyl-trna synthetase,2,11,0.2	glycyl-trna synthetase	2	11	0.2
alpha subunit,2,11,0.2	alpha subunit	2	11	0.2
permease components,2,11,0.2	permease components	2	11	0.2
systems permease,2,11,0.2	systems permease	2	11	0.2
related enzymes,2,12,0.2	related enzymes	2	12	0.2
system permease,2,12,0.2	system permease	2	12	0.2
involved resistance,2,12,0.2	involved resistance	2	12	0.2
resistance organic,2,12,0.2	resistance organic	2	12	0.2
organic solvents,2,12,0.2	organic solvents	2	12	0.2
component abc-type,2,12,0.2	component abc-type	2	12	0.2
dna-directed rna,2,8,0.2	dna-directed rna	2	8	0.2
rna polymerase,2,8,0.2	rna polymerase	2	8	0.2
sigma subunit,2,8,0.2	sigma subunit	2	8	0.2
pyruvate ferredoxin,2,8,0.2	pyruvate ferredoxin	2	8	0.2
ferredoxin oxidoreductase,2,8,0.2	ferredoxin oxidoreductase	2	8	0.2
oxidoreductase related,2,8,0.2	oxidoreductase related	2	8	0.2
related 2-oxoacid,2,8,0.2	related 2-oxoacid	2	8	0.2
2-oxoacid ferredoxin,2,8,0.2	2-oxoacid ferredoxin	2	8	0.2
ferredoxin oxidoreductases,2,8,0.2	ferredoxin oxidoreductases	2	8	0.2
protein (contains,2,8,0.2	protein (contains	2	8	0.2
protein abc-type,2,8,0.2	protein abc-type	2	8	0.2
abc-type phosphate,2,8,0.2	abc-type phosphate	2	8	0.2
zn-ribbon protein,2,9,0.2	zn-ribbon protein	2	9	0.2
protein possibly,2,9,0.2	protein possibly	2	9	0.2
possibly nucleic,2,9,0.2	possibly nucleic	2	9	0.2
nucleic acid-binding,2,9,0.2	nucleic acid-binding	2	9	0.2
related proteins,2,9,0.2	related proteins	2	9	0.2
dna rna,2,9,0.2	dna rna	2	9	0.2
rna helicases,2,9,0.2	rna helicases	2	9	0.2
abc-type multidrug,2,9,0.2	abc-type multidrug	2	9	0.2
multidrug transport,2,9,0.2	multidrug transport	2	9	0.2
beta subunit,2,9,0.2	beta subunit	2	9	0.2
amino acid,2,9,0.2	amino acid	2	9	0.2
predicted rna-binding,2,9,0.2	predicted rna-binding	2	9	0.2
rna-binding protein,2,9,0.2	rna-binding protein	2	9	0.2
abc-type dipeptide/oligopeptide/nickel,2,9,0.2	abc-type dipeptide/oligopeptide/nickel	2	9	0.2
dipeptide/oligopeptide/nickel transport,2,9,0.2	dipeptide/oligopeptide/nickel transport	2	9	0.2
periplasmic component,2,9,0.2	periplasmic component	2	9	0.2
phosphate transport,2,9,0.2	phosphate transport	2	9	0.2
subunit 1,2,3,0.1	subunit 1	2	3	0.1
1 allophanate,2,3,0.1	1 allophanate	2	3	0.1
subunit 2,2,3,0.1	subunit 2	2	3	0.1
2 uncharacterized,2,3,0.1	2 uncharacterized	2	3	0.1
proteins homologs,2,3,0.1	proteins homologs	2	3	0.1
homologs lactam,2,3,0.1	homologs lactam	2	3	0.1
lactam utilization,2,3,0.1	lactam utilization	2	3	0.1
utilization protein,2,3,0.1	utilization protein	2	3	0.1
fructose-2 6-bisphosphatase,2,3,0.1	fructose-2 6-bisphosphatase	2	3	0.1
glycine/d-amino acid,2,3,0.1	glycine/d-amino acid	2	3	0.1
acid oxidases,2,3,0.1	acid oxidases	2	3	0.1
oxidases (deaminating),2,3,0.1	oxidases (deaminating)	2	3	0.1
formamidopyrimidine-dna glycosylase,2,3,0.1	formamidopyrimidine-dna glycosylase	2	3	0.1
3-deoxy-d-manno-octulosonic-acid transferase,2,3,0.1	3-deoxy-d-manno-octulosonic-acid transferase	2	3	0.1
di- tripeptidases,2,3,0.1	di- tripeptidases	2	3	0.1
dtdp-glucose pyrophosphorylase,2,3,0.1	dtdp-glucose pyrophosphorylase	2	3	0.1
dtdp-4-dehydrorhamnose 3,2,3,0.1	dtdp-4-dehydrorhamnose 3	2	3	0.1
3 5-epimerase,2,3,0.1	3 5-epimerase	2	3	0.1
5-epimerase related,2,3,0.1	5-epimerase related	2	3	0.1
putative primosome,2,3,0.1	putative primosome	2	3	0.1
primosome component,2,3,0.1	primosome component	2	3	0.1
deoxyribodipyrimidine photolyase,2,3,0.1	deoxyribodipyrimidine photolyase	2	3	0.1
pyrrolidone-carboxylate peptidase,2,3,0.1	pyrrolidone-carboxylate peptidase	2	3	0.1
peptidase (n-terminal,2,3,0.1	peptidase (n-terminal	2	3	0.1
(n-terminal pyroglutamyl,2,3,0.1	(n-terminal pyroglutamyl	2	3	0.1
pyroglutamyl peptidase),2,3,0.1	pyroglutamyl peptidase)	2	3	0.1
dtdp-d-glucose 4,2,3,0.1	dtdp-d-glucose 4	2	3	0.1
4 6-dehydratase,2,3,0.1	4 6-dehydratase	2	3	0.1
prolipoprotein diacylglyceryltransferase,2,3,0.1	prolipoprotein diacylglyceryltransferase	2	3	0.1
phosphoribosylcarboxyaminoimidazole (ncair),2,3,0.1	phosphoribosylcarboxyaminoimidazole (ncair)	2	3	0.1
(ncair) mutase,2,3,0.1	(ncair) mutase	2	3	0.1
enzymes uncharacterized,2,3,0.1	enzymes uncharacterized	2	3	0.1
gtpases (dynamin-related),2,3,0.1	gtpases (dynamin-related)	2	3	0.1
adenine/guanine phosphoribosyltransferases,2,3,0.1	adenine/guanine phosphoribosyltransferases	2	3	0.1
phosphoribosyltransferases related,2,3,0.1	phosphoribosyltransferases related	2	3	0.1
related prpp-binding,2,3,0.1	related prpp-binding	2	3	0.1
prpp-binding proteins,2,3,0.1	prpp-binding proteins	2	3	0.1
protein l19,2,3,0.1	protein l19	2	3	0.1
predicted divalent,2,3,0.1	predicted divalent	2	3	0.1
divalent heavy-metal,2,3,0.1	divalent heavy-metal	2	3	0.1
heavy-metal cations,2,3,0.1	heavy-metal cations	2	3	0.1
cations transporter,2,3,0.1	cations transporter	2	3	0.1
inorganic pyrophosphatase/exopolyphosphatase,2,3,0.1	inorganic pyrophosphatase/exopolyphosphatase	2	3	0.1
penicillin tolerance,2,3,0.1	penicillin tolerance	2	3	0.1
abc-type uncharacterized,2,3,0.1	abc-type uncharacterized	2	3	0.1
uncharacterized transport,2,3,0.1	uncharacterized transport	2	3	0.1
rimm protein,2,3,0.1	rimm protein	2	3	0.1
required 16s,2,3,0.1	required 16s	2	3	0.1
16s rrna,2,3,0.1	16s rrna	2	3	0.1
rrna processing,2,3,0.1	rrna processing	2	3	0.1
branched-chain amino,2,3,0.1	branched-chain amino	2	3	0.1
hydroxymethylpyrimidine/phosphomethylpyrimidine kinase,2,3,0.1	hydroxymethylpyrimidine/phosphomethylpyrimidine kinase	2	3	0.1
solvents auxiliary,2,3,0.1	solvents auxiliary	2	3	0.1
auxiliary component,2,3,0.1	auxiliary component	2	3	0.1
protein s16,2,3,0.1	protein s16	2	3	0.1
predicted ntp,2,3,0.1	predicted ntp	2	3	0.1
ntp binding,2,3,0.1	ntp binding	2	3	0.1
binding protein,2,3,0.1	binding protein	2	3	0.1
(contains stas,2,3,0.1	(contains stas	2	3	0.1
stas domain),2,3,0.1	stas domain)	2	3	0.1
dgtp triphosphohydrolase,2,3,0.1	dgtp triphosphohydrolase	2	3	0.1
atp phosphoribosyltransferase,2,3,0.1	atp phosphoribosyltransferase	2	3	0.1
glutaredoxin related,2,3,0.1	glutaredoxin related	2	3	0.1
rhodanese-related sulfurtransferase,2,3,0.1	rhodanese-related sulfurtransferase	2	3	0.1
(contains kh,2,3,0.1	(contains kh	2	3	0.1
kh domain),2,3,0.1	kh domain)	2	3	0.1
abc-type mn/zn,2,3,0.1	abc-type mn/zn	2	3	0.1
mn/zn transport,2,3,0.1	mn/zn transport	2	3	0.1
cytochrome mono-,2,3,0.1	cytochrome mono-	2	3	0.1
mono- diheme,2,3,0.1	mono- diheme	2	3	0.1
diheme variants,2,3,0.1	diheme variants	2	3	0.1
membrane lipoprotein,2,3,0.1	membrane lipoprotein	2	3	0.1
stress-induced morphogen,2,3,0.1	stress-induced morphogen	2	3	0.1
morphogen (activity,2,3,0.1	morphogen (activity	2	3	0.1
(activity unknown),2,3,0.1	(activity unknown)	2	3	0.1
subunit pyruvate,2,3,0.1	subunit pyruvate	2	3	0.1
solvents permease,2,3,0.1	solvents permease	2	3	0.1
abc-type mn2+/zn2+,2,3,0.1	abc-type mn2+/zn2+	2	3	0.1
mn2+/zn2+ transport,2,3,0.1	mn2+/zn2+ transport	2	3	0.1
histidinol dehydrogenase,2,3,0.1	histidinol dehydrogenase	2	3	0.1
delta subunit,2,3,0.1	delta subunit	2	3	0.1
anthranilate/para-aminobenzoate synthases,2,3,0.1	anthranilate/para-aminobenzoate synthases	2	3	0.1
synthases component,2,3,0.1	synthases component	2	3	0.1
solvents periplasmic,2,3,0.1	solvents periplasmic	2	3	0.1
pyridoxal phosphate,2,3,0.1	pyridoxal phosphate	2	3	0.1
phosphate biosynthesis,2,3,0.1	phosphate biosynthesis	2	3	0.1
solvents atpase,2,3,0.1	solvents atpase	2	3	0.1
bacteria uncharacterized,2,3,0.1	bacteria uncharacterized	2	3	0.1
response regulator,2,3,0.1	response regulator	2	3	0.1
dehydrogenase related,2,3,0.1	dehydrogenase related	2	3	0.1
abc-type sugar,2,3,0.1	abc-type sugar	2	3	0.1
sugar transport,2,3,0.1	sugar transport	2	3	0.1
peptide methionine,2,3,0.1	peptide methionine	2	3	0.1
methionine sulfoxide,2,3,0.1	methionine sulfoxide	2	3	0.1
sulfoxide reductase,2,3,0.1	sulfoxide reductase	2	3	0.1
valyl-trna synthetase,2,3,0.1	valyl-trna synthetase	2	3	0.1
biosynthesis enzyme,2,3,0.1	biosynthesis enzyme	2	3	0.1
abc-type dipeptide,2,3,0.1	abc-type dipeptide	2	3	0.1
dipeptide transport,2,3,0.1	dipeptide transport	2	3	0.1
(sigma70/sigma32) dna,2,3,0.1	(sigma70/sigma32) dna	2	3	0.1
components predicted,2,3,0.1	components predicted	2	3	0.1
protein kinase,2,3,0.1	protein kinase	2	3	0.1
molecular chaperone,2,3,0.1	molecular chaperone	2	3	0.1
repair enzyme,2,3,0.1	repair enzyme	2	3	0.1
metal-binding protein,2,3,0.1	metal-binding protein	2	3	0.1
sh3 domain,2,3,0.1	sh3 domain	2	3	0.1
domain protein,2,3,0.1	domain protein	2	3	0.1
hydrolase (had,2,3,0.1	hydrolase (had	2	3	0.1
(had superfamily),2,3,0.1	(had superfamily)	2	3	0.1
predicted permease,2,3,0.1	predicted permease	2	3	0.1
transporters udp-glucose,2,3,0.1	transporters udp-glucose	2	3	0.1
udp-glucose 4-epimerase,2,3,0.1	udp-glucose 4-epimerase	2	3	0.1
alpha/beta superfamily,2,3,0.1	alpha/beta superfamily	2	3	0.1
enzyme predicted,2,3,0.1	enzyme predicted	2	3	0.1
protein dna-directed,2,3,0.1	protein dna-directed	2	3	0.1
histidine kinase,2,3,0.1	histidine kinase	2	3	0.1
predicted integral,2,3,0.1	predicted integral	2	3	0.1
integral membrane,2,3,0.1	integral membrane	2	3	0.1
a/g-specific dna,2,4,0.1	a/g-specific dna	2	4	0.1
pseudouridylate synthases,2,4,0.1	pseudouridylate synthases	2	4	0.1
synthases 23s,2,4,0.1	synthases 23s	2	4	0.1
23s rna-specific,2,4,0.1	23s rna-specific	2	4	0.1
component related,2,4,0.1	component related	2	4	0.1
endonuclease iv,2,4,0.1	endonuclease iv	2	4	0.1
signal recognition,2,4,0.1	signal recognition	2	4	0.1
recognition particle,2,4,0.1	recognition particle	2	4	0.1
particle gtpase,2,4,0.1	particle gtpase	2	4	0.1
ntp pyrophosphohydrolases,2,4,0.1	ntp pyrophosphohydrolases	2	4	0.1
pyrophosphohydrolases including,2,4,0.1	pyrophosphohydrolases including	2	4	0.1
including oxidative,2,4,0.1	including oxidative	2	4	0.1
oxidative damage,2,4,0.1	oxidative damage	2	4	0.1
damage repair,2,4,0.1	damage repair	2	4	0.1
repair enzymes,2,4,0.1	repair enzymes	2	4	0.1
predicted endoiii-related,2,4,0.1	predicted endoiii-related	2	4	0.1
endoiii-related endonuclease,2,4,0.1	endoiii-related endonuclease	2	4	0.1
chromosome segregation,2,4,0.1	chromosome segregation	2	4	0.1
segregation atpases,2,4,0.1	segregation atpases	2	4	0.1
predicted gtpases,2,4,0.1	predicted gtpases	2	4	0.1
tolerance protein,2,4,0.1	tolerance protein	2	4	0.1
translation elongation,2,4,0.1	translation elongation	2	4	0.1
elongation factor,2,4,0.1	elongation factor	2	4	0.1
udp-n-acetylglucosamine enolpyruvyl,2,4,0.1	udp-n-acetylglucosamine enolpyruvyl	2	4	0.1
enolpyruvyl transferase,2,4,0.1	enolpyruvyl transferase	2	4	0.1
fe2+/zn2+ uptake,2,4,0.1	fe2+/zn2+ uptake	2	4	0.1
uptake regulation,2,4,0.1	uptake regulation	2	4	0.1
regulation proteins,2,4,0.1	regulation proteins	2	4	0.1
synthetase beta,2,4,0.1	synthetase beta	2	4	0.1
protein required,2,4,0.1	protein required	2	4	0.1
parvulin-like peptidyl-prolyl,2,4,0.1	parvulin-like peptidyl-prolyl	2	4	0.1
peptidyl-prolyl isomerase,2,4,0.1	peptidyl-prolyl isomerase	2	4	0.1
protein cytochrome,2,4,0.1	protein cytochrome	2	4	0.1
gamma subunit,2,4,0.1	gamma subunit	2	4	0.1
regulators uncharacterized,2,4,0.1	regulators uncharacterized	2	4	0.1
atpase components,2,4,0.1	atpase components	2	4	0.1
predicted zn-dependent,2,4,0.1	predicted zn-dependent	2	4	0.1
zn-dependent hydrolases,2,4,0.1	zn-dependent hydrolases	2	4	0.1
fe-s protein,2,4,0.1	fe-s protein	2	4	0.1
synthetase predicted,2,4,0.1	synthetase predicted	2	4	0.1
predicted atpase,2,4,0.1	predicted atpase	2	4	0.1
dna repair,2,4,0.1	dna repair	2	4	0.1
superfamily predicted,2,4,0.1	superfamily predicted	2	4	0.1
hd superfamily,2,4,0.1	hd superfamily	2	4	0.1
acid transporters,2,4,0.1	acid transporters	2	4	0.1
diadenosine tetraphosphatase,2,4,0.1	diadenosine tetraphosphatase	2	4	0.1
tetraphosphatase related,2,4,0.1	tetraphosphatase related	2	4	0.1
related serine/threonine,2,4,0.1	related serine/threonine	2	4	0.1
protein phosphatases,2,4,0.1	protein phosphatases	2	4	0.1
atp-dependent dna,2,4,0.1	atp-dependent dna	2	4	0.1
chey-like receiver,2,4,0.1	chey-like receiver	2	4	0.1
receiver domain,2,4,0.1	receiver domain	2	4	0.1
k+-transporting atpase,2,4,0.1	k+-transporting atpase	2	4	0.1
superfamily dna,2,4,0.1	superfamily dna	2	4	0.1
phosphotransferase system,2,4,0.1	phosphotransferase system	2	4	0.1
archaea predicted,2,4,0.1	archaea predicted	2	4	0.1
proteins methyl,2,4,0.1	proteins methyl	2	4	0.1
reductase subunit,2,4,0.1	reductase subunit	2	4	0.1
cluster assembly,2,4,0.1	cluster assembly	2	4	0.1
subunit tetrahydromethanopterin,2,4,0.1	subunit tetrahydromethanopterin	2	4	0.1
histidinol-phosphate/aromatic aminotransferase,2,5,0.1	histidinol-phosphate/aromatic aminotransferase	2	5	0.1
aminotransferase cobyric,2,5,0.1	aminotransferase cobyric	2	5	0.1
cobyric acid,2,5,0.1	cobyric acid	2	5	0.1
acid decarboxylase,2,5,0.1	acid decarboxylase	2	5	0.1
glycerol-3-phosphate dehydrogenase,2,5,0.1	glycerol-3-phosphate dehydrogenase	2	5	0.1
homoserine trans-succinylase,2,5,0.1	homoserine trans-succinylase	2	5	0.1
collagenase related,2,5,0.1	collagenase related	2	5	0.1
related proteases,2,5,0.1	related proteases	2	5	0.1
ii dna,2,5,0.1	ii dna	2	5	0.1
multimeric flavodoxin,2,5,0.1	multimeric flavodoxin	2	5	0.1
flavodoxin wrba,2,5,0.1	flavodoxin wrba	2	5	0.1
dna polymerase,2,5,0.1	dna polymerase	2	5	0.1
biosynthesis protein,2,5,0.1	biosynthesis protein	2	5	0.1
pp-loop superfamily,2,5,0.1	pp-loop superfamily	2	5	0.1
dehydrogenases specificities,2,5,0.1	dehydrogenases specificities	2	5	0.1
specificities (related,2,5,0.1	specificities (related	2	5	0.1
(related short-chain,2,5,0.1	(related short-chain	2	5	0.1
short-chain alcohol,2,5,0.1	short-chain alcohol	2	5	0.1
alcohol dehydrogenases),2,5,0.1	alcohol dehydrogenases)	2	5	0.1
sam-dependent methyltransferases,2,5,0.1	sam-dependent methyltransferases	2	5	0.1
component uncharacterized,2,5,0.1	component uncharacterized	2	5	0.1
repeat predicted,2,5,0.1	repeat predicted	2	5	0.1
involved fe-s,2,5,0.1	involved fe-s	2	5	0.1
fe-s cluster,2,5,0.1	fe-s cluster	2	5	0.1
hydrolases acyltransferases,2,5,0.1	hydrolases acyltransferases	2	5	0.1
acyltransferases (alpha/beta,2,5,0.1	acyltransferases (alpha/beta	2	5	0.1
(alpha/beta hydrolase,2,5,0.1	(alpha/beta hydrolase	2	5	0.1
hydrolase superfamily),2,5,0.1	hydrolase superfamily)	2	5	0.1
subunit abc-type,2,5,0.1	subunit abc-type	2	5	0.1
synthase uncharacterized,2,5,0.1	synthase uncharacterized	2	5	0.1
serine/threonine protein,2,5,0.1	serine/threonine protein	2	5	0.1
dna-binding domain,2,5,0.1	dna-binding domain	2	5	0.1
predicted sam-dependent,2,6,0.1	predicted sam-dependent	2	6	0.1
sam-dependent methyltransferase,2,6,0.1	sam-dependent methyltransferase	2	6	0.1
allophanate hydrolase,2,6,0.1	allophanate hydrolase	2	6	0.1
hydrolase subunit,2,6,0.1	hydrolase subunit	2	6	0.1
uncharacterized proteins,2,6,0.1	uncharacterized proteins	2	6	0.1
dna glycosylase,2,6,0.1	dna glycosylase	2	6	0.1
dna primase,2,6,0.1	dna primase	2	6	0.1
primase (bacterial,2,6,0.1	primase (bacterial	2	6	0.1
(bacterial type),2,6,0.1	(bacterial type)	2	6	0.1
synthetase alpha,2,6,0.1	synthetase alpha	2	6	0.1
bacteria predicted,2,6,0.1	bacteria predicted	2	6	0.1
systems atpase,2,6,0.1	systems atpase	2	6	0.1
outer membrane,2,6,0.1	outer membrane	2	6	0.1
fog tpr,2,6,0.1	fog tpr	2	6	0.1
tpr repeat,2,6,0.1	tpr repeat	2	6	0.1
protein zn-ribbon,2,6,0.1	protein zn-ribbon	2	6	0.1
subunit predicted,2,6,0.1	subunit predicted	2	6	0.1
permeases major,2,6,0.1	permeases major	2	6	0.1
major facilitator,2,6,0.1	major facilitator	2	6	0.1
facilitator superfamily,2,6,0.1	facilitator superfamily	2	6	0.1
dna ligase,2,6,0.1	dna ligase	2	6	0.1
predicted hydrolase,2,6,0.1	predicted hydrolase	2	6	0.1
atpase chain,2,6,0.1	atpase chain	2	6	0.1
subunit methyl,2,6,0.1	subunit methyl	2	6	0.1
component tetrahydromethanopterin,2,6,0.1	component tetrahydromethanopterin	2	6	0.1
polymerase sigma,2,7,0.1	polymerase sigma	2	7	0.1
subunit (sigma70/sigma32),2,7,0.1	subunit (sigma70/sigma32)	2	7	0.1
superfamily ii,2,7,0.1	superfamily ii	2	7	0.1
system periplasmic,2,7,0.1	system periplasmic	2	7	0.1
subunit uncharacterized,2,7,0.1	subunit uncharacterized	2	7	0.1
component predicted,2,7,0.1	component predicted	2	7	0.1
predicted hydrolases,2,7,0.1	predicted hydrolases	2	7	0.1
acid-binding allophanate,2,1,0.0	acid-binding allophanate	2	1	0.0
protein fructose-2,2,1,0.0	protein fructose-2	2	1	0.0
ribonuclease glycine/d-amino,2,1,0.0	ribonuclease glycine/d-amino	2	1	0.0
(deaminating) dna-directed,2,1,0.0	(deaminating) dna-directed	2	1	0.0
(sigma70/sigma32) formamidopyrimidine-dna,2,1,0.0	(sigma70/sigma32) formamidopyrimidine-dna	2	1	0.0
glycosylase a/g-specific,2,1,0.0	glycosylase a/g-specific	2	1	0.0
glycosylase dna,2,1,0.0	glycosylase dna	2	1	0.0
subunit 3-deoxy-d-manno-octulosonic-acid,2,1,0.0	subunit 3-deoxy-d-manno-octulosonic-acid	2	1	0.0
transferase di-,2,1,0.0	transferase di-	2	1	0.0
tripeptidases dtdp-glucose,2,1,0.0	tripeptidases dtdp-glucose	2	1	0.0
enzymes pseudouridylate,2,1,0.0	enzymes pseudouridylate	2	1	0.0
rna-specific histidinol-phosphate/aromatic,2,1,0.0	rna-specific histidinol-phosphate/aromatic	2	1	0.0
decarboxylase putative,2,1,0.0	decarboxylase putative	2	1	0.0
ii) deoxyribodipyrimidine,2,1,0.0	ii) deoxyribodipyrimidine	2	1	0.0
photolyase glycerol-3-phosphate,2,1,0.0	photolyase glycerol-3-phosphate	2	1	0.0
protein homoserine,2,1,0.0	protein homoserine	2	1	0.0
trans-succinylase collagenase,2,1,0.0	trans-succinylase collagenase	2	1	0.0
proteases pyrrolidone-carboxylate,2,1,0.0	proteases pyrrolidone-carboxylate	2	1	0.0
peptidase) dtdp-d-glucose,2,1,0.0	peptidase) dtdp-d-glucose	2	1	0.0
6-dehydratase endonuclease,2,1,0.0	6-dehydratase endonuclease	2	1	0.0
iv nitroreductase,2,1,0.0	iv nitroreductase	2	1	0.0
nitroreductase signal,2,1,0.0	nitroreductase signal	2	1	0.0
protein prolipoprotein,2,1,0.0	protein prolipoprotein	2	1	0.0
diacylglyceryltransferase phosphoribosylcarboxyaminoimidazole,2,1,0.0	diacylglyceryltransferase phosphoribosylcarboxyaminoimidazole	2	1	0.0
mutase ntp,2,1,0.0	mutase ntp	2	1	0.0
endonuclease chromosome,2,1,0.0	endonuclease chromosome	2	1	0.0
atpases superfamily,2,1,0.0	atpases superfamily	2	1	0.0
helicases predicted,2,1,0.0	helicases predicted	2	1	0.0
(dynamin-related) adenine/guanine,2,1,0.0	(dynamin-related) adenine/guanine	2	1	0.0
proteins multimeric,2,1,0.0	proteins multimeric	2	1	0.0
wrba uncharacterized,2,1,0.0	wrba uncharacterized	2	1	0.0
l19 uncharacterized,2,1,0.0	l19 uncharacterized	2	1	0.0
transporter ribosomal,2,1,0.0	transporter ribosomal	2	1	0.0
s2 uncharacterized,2,1,0.0	s2 uncharacterized	2	1	0.0
pyrophosphatase/exopolyphosphatase transcriptional,2,1,0.0	pyrophosphatase/exopolyphosphatase transcriptional	2	1	0.0
regulators lipoprotein,2,1,0.0	regulators lipoprotein	2	1	0.0
peptidase penicillin,2,1,0.0	peptidase penicillin	2	1	0.0
protein translation,2,1,0.0	protein translation	2	1	0.0
ts 5,2,1,0.0	ts 5	2	1	0.0
bacteria acetyltransferase,2,1,0.0	bacteria acetyltransferase	2	1	0.0
superfamily) udp-n-acetylglucosamine,2,1,0.0	superfamily) udp-n-acetylglucosamine	2	1	0.0
component thymidylate,2,1,0.0	component thymidylate	2	1	0.0
kinase fe2+/zn2+,2,1,0.0	kinase fe2+/zn2+	2	1	0.0
components glycyl-trna,2,1,0.0	components glycyl-trna	2	1	0.0
subunit dna,2,1,0.0	subunit dna	2	1	0.0
domains rimm,2,1,0.0	domains rimm	2	1	0.0
processing uncharacterized,2,1,0.0	processing uncharacterized	2	1	0.0
periplasmic component/surface,2,1,0.0	periplasmic component/surface	2	1	0.0
component/surface lipoprotein,2,1,0.0	component/surface lipoprotein	2	1	0.0
lipoprotein branched-chain,2,1,0.0	lipoprotein branched-chain	2	1	0.0
lyase fkbp-type,2,1,0.0	lyase fkbp-type	2	1	0.0
factor) thiamine,2,1,0.0	factor) thiamine	2	1	0.0
synthase hydroxymethylpyrimidine/phosphomethylpyrimidine,2,1,0.0	synthase hydroxymethylpyrimidine/phosphomethylpyrimidine	2	1	0.0
kinase trna-(guanine-n1)-methyltransferase,2,1,0.0	kinase trna-(guanine-n1)-methyltransferase	2	1	0.0
trna-(guanine-n1)-methyltransferase uncharacterized,2,1,0.0	trna-(guanine-n1)-methyltransferase uncharacterized	2	1	0.0
oxidoreductase 6-pyruvoyl-tetrahydropterin,2,1,0.0	oxidoreductase 6-pyruvoyl-tetrahydropterin	2	1	0.0
synthase pyruvate,2,1,0.0	synthase pyruvate	2	1	0.0
bacteria abc-type,2,1,0.0	bacteria abc-type	2	1	0.0
s16 molybdopterin-guanine,2,1,0.0	s16 molybdopterin-guanine	2	1	0.0
domain) histidinol,2,1,0.0	domain) histidinol	2	1	0.0
domain dgtp,2,1,0.0	domain dgtp	2	1	0.0
triphosphohydrolase 7,2,1,0.0	triphosphohydrolase 7	2	1	0.0
protein antitoxin,2,1,0.0	protein antitoxin	2	1	0.0
system predicted,2,1,0.0	system predicted	2	1	0.0
atpase atp,2,1,0.0	atpase atp	2	1	0.0
phosphoribosyltransferase dehydrogenases,2,1,0.0	phosphoribosyltransferase dehydrogenases	2	1	0.0
dehydrogenases) glutaredoxin,2,1,0.0	dehydrogenases) glutaredoxin	2	1	0.0
proteins uncharacterized,2,1,0.0	proteins uncharacterized	2	1	0.0
pyrophosphatase rhodanese-related,2,1,0.0	pyrophosphatase rhodanese-related	2	1	0.0
sulfurtransferase predicted,2,1,0.0	sulfurtransferase predicted	2	1	0.0
domain) abc-type,2,1,0.0	domain) abc-type	2	1	0.0
component dihydroneopterin,2,1,0.0	component dihydroneopterin	2	1	0.0
dihydroneopterin aldolase,2,1,0.0	dihydroneopterin aldolase	2	1	0.0
aldolase abc-type,2,1,0.0	aldolase abc-type	2	1	0.0
component parvulin-like,2,1,0.0	component parvulin-like	2	1	0.0
isomerase uncharacterized,2,1,0.0	isomerase uncharacterized	2	1	0.0
variants outer,2,1,0.0	variants outer	2	1	0.0
lipoprotein sam-dependent,2,1,0.0	lipoprotein sam-dependent	2	1	0.0
methyltransferases uncharacterized,2,1,0.0	methyltransferases uncharacterized	2	1	0.0
bacteria type,2,1,0.0	bacteria type	2	1	0.0
glycosidases stress-induced,2,1,0.0	glycosidases stress-induced	2	1	0.0
unknown) pyruvate,2,1,0.0	unknown) pyruvate	2	1	0.0
subunit putative,2,1,0.0	subunit putative	2	1	0.0
(sua5) abc-type,2,1,0.0	(sua5) abc-type	2	1	0.0
components cystathionine,2,1,0.0	components cystathionine	2	1	0.0
gamma-synthases atpases,2,1,0.0	gamma-synthases atpases	2	1	0.0
atpases involved,2,1,0.0	atpases involved	2	1	0.0
involved chromosome,2,1,0.0	involved chromosome	2	1	0.0
chromosome partitioning,2,1,0.0	chromosome partitioning	2	1	0.0
partitioning d-mannonate,2,1,0.0	partitioning d-mannonate	2	1	0.0
dehydratase histidinol,2,1,0.0	dehydratase histidinol	2	1	0.0
dehydrogenase pyruvate,2,1,0.0	dehydrogenase pyruvate	2	1	0.0
subunit anthranilate/para-aminobenzoate,2,1,0.0	subunit anthranilate/para-aminobenzoate	2	1	0.0
component atp-dependent,2,1,0.0	component atp-dependent	2	1	0.0
type abc-type,2,1,0.0	type abc-type	2	1	0.0
components abc-type,2,1,0.0	components abc-type	2	1	0.0
component orotate,2,1,0.0	component orotate	2	1	0.0
phosphoribosyltransferase predicted,2,1,0.0	phosphoribosyltransferase predicted	2	1	0.0
fold fog,2,1,0.0	fold fog	2	1	0.0
repeat pyridoxal,2,1,0.0	repeat pyridoxal	2	1	0.0
acid-binding fructose-2,2,1,0.0	acid-binding fructose-2	2	1	0.0
ribonuclease histidinol-phosphate/aromatic,2,1,0.0	ribonuclease histidinol-phosphate/aromatic	2	1	0.0
decarboxylase ntp,2,1,0.0	decarboxylase ntp	2	1	0.0
enzymes dna,2,1,0.0	enzymes dna	2	1	0.0
domains 5,2,1,0.0	domains 5	2	1	0.0
protein type,2,1,0.0	protein type	2	1	0.0
glycosidases response,2,1,0.0	glycosidases response	2	1	0.0
regulator putative,2,1,0.0	regulator putative	2	1	0.0
putative antiterminator,2,1,0.0	putative antiterminator	2	1	0.0
antiterminator output,2,1,0.0	antiterminator output	2	1	0.0
output domain,2,1,0.0	output domain	2	1	0.0
domain antitoxin,2,1,0.0	domain antitoxin	2	1	0.0
system phosphopantothenoylcysteine,2,1,0.0	system phosphopantothenoylcysteine	2	1	0.0
synthetase/decarboxylase pentose-5-phosphate-3-epimerase,2,1,0.0	synthetase/decarboxylase pentose-5-phosphate-3-epimerase	2	1	0.0
pentose-5-phosphate-3-epimerase cysteine,2,1,0.0	pentose-5-phosphate-3-epimerase cysteine	2	1	0.0
cysteine sulfinate,2,1,0.0	cysteine sulfinate	2	1	0.0
sulfinate desulfinase/cysteine,2,1,0.0	sulfinate desulfinase/cysteine	2	1	0.0
desulfinase/cysteine desulfurase,2,1,0.0	desulfinase/cysteine desulfurase	2	1	0.0
desulfurase related,2,1,0.0	desulfurase related	2	1	0.0
regulators histidinol,2,1,0.0	regulators histidinol	2	1	0.0
family na+/proline,2,1,0.0	family na+/proline	2	1	0.0
na+/proline symporter,2,1,0.0	na+/proline symporter	2	1	0.0
symporter predicted,2,1,0.0	symporter predicted	2	1	0.0
regulator n-methylhydantoinase,2,1,0.0	regulator n-methylhydantoinase	2	1	0.0
n-methylhydantoinase a/acetone,2,1,0.0	n-methylhydantoinase a/acetone	2	1	0.0
a/acetone carboxylase,2,1,0.0	a/acetone carboxylase	2	1	0.0
carboxylase beta,2,1,0.0	carboxylase beta	2	1	0.0
subunit dehydrogenases,2,1,0.0	subunit dehydrogenases	2	1	0.0
dehydrogenases) methionine,2,1,0.0	dehydrogenases) methionine	2	1	0.0
methionine synthase,2,1,0.0	methionine synthase	2	1	0.0
synthase ii,2,1,0.0	synthase ii	2	1	0.0
ii (cobalamin-independent),2,1,0.0	ii (cobalamin-independent)	2	1	0.0
(cobalamin-independent) predicted,2,1,0.0	(cobalamin-independent) predicted	2	1	0.0
gtpases threonine,2,1,0.0	gtpases threonine	2	1	0.0
threonine dehydrogenase,2,1,0.0	threonine dehydrogenase	2	1	0.0
related zn-dependent,2,1,0.0	related zn-dependent	2	1	0.0
zn-dependent dehydrogenases,2,1,0.0	zn-dependent dehydrogenases	2	1	0.0
dehydrogenases lactoylglutathione,2,1,0.0	dehydrogenases lactoylglutathione	2	1	0.0
lyases uncharacterized,2,1,0.0	lyases uncharacterized	2	1	0.0
transcriptional regulator/sugar,2,1,0.0	transcriptional regulator/sugar	2	1	0.0
regulator/sugar kinase,2,1,0.0	regulator/sugar kinase	2	1	0.0
fog wd40,2,1,0.0	fog wd40	2	1	0.0
wd40 repeat,2,1,0.0	wd40 repeat	2	1	0.0
predicted permeases,2,1,0.0	predicted permeases	2	1	0.0
permeases nifu,2,1,0.0	permeases nifu	2	1	0.0
nifu homolog,2,1,0.0	nifu homolog	2	1	0.0
homolog involved,2,1,0.0	homolog involved	2	1	0.0
cluster formation,2,1,0.0	cluster formation	2	1	0.0
formation predicted,2,1,0.0	formation predicted	2	1	0.0
protein chromosome,2,1,0.0	protein chromosome	2	1	0.0
predicted signal-transduction,2,1,0.0	predicted signal-transduction	2	1	0.0
signal-transduction protein,2,1,0.0	signal-transduction protein	2	1	0.0
protein camp-binding,2,1,0.0	protein camp-binding	2	1	0.0
camp-binding cbs,2,1,0.0	camp-binding cbs	2	1	0.0
cbs domains,2,1,0.0	cbs domains	2	1	0.0
domains glycerol-3-phosphate,2,1,0.0	domains glycerol-3-phosphate	2	1	0.0
dehydrogenase 6-pyruvoyl-tetrahydropterin,2,1,0.0	dehydrogenase 6-pyruvoyl-tetrahydropterin	2	1	0.0
synthase cystathionine,2,1,0.0	synthase cystathionine	2	1	0.0
gamma-synthases n-methylhydantoinase,2,1,0.0	gamma-synthases n-methylhydantoinase	2	1	0.0
n-methylhydantoinase b/acetone,2,1,0.0	n-methylhydantoinase b/acetone	2	1	0.0
b/acetone carboxylase,2,1,0.0	b/acetone carboxylase	2	1	0.0
carboxylase alpha,2,1,0.0	carboxylase alpha	2	1	0.0
predicted gtpase,2,1,0.0	predicted gtpase	2	1	0.0
gtpase permeases,2,1,0.0	gtpase permeases	2	1	0.0
protein serine,2,1,0.0	protein serine	2	1	0.0
serine protease,2,1,0.0	serine protease	2	1	0.0
protease inhibitor,2,1,0.0	protease inhibitor	2	1	0.0
inhibitor abc-type,2,1,0.0	inhibitor abc-type	2	1	0.0
components orotate,2,1,0.0	components orotate	2	1	0.0
phosphoribosyltransferase alpha-galactosidases/6-phospho-beta-glucosidases,2,1,0.0	phosphoribosyltransferase alpha-galactosidases/6-phospho-beta-glucosidases	2	1	0.0
alpha-galactosidases/6-phospho-beta-glucosidases family,2,1,0.0	alpha-galactosidases/6-phospho-beta-glucosidases family	2	1	0.0
family 4,2,1,0.0	family 4	2	1	0.0
4 glycosyl,2,1,0.0	4 glycosyl	2	1	0.0
component exoribonuclease,2,1,0.0	component exoribonuclease	2	1	0.0
exoribonuclease abc-type,2,1,0.0	exoribonuclease abc-type	2	1	0.0
predicted n-acetylglucosamine,2,1,0.0	predicted n-acetylglucosamine	2	1	0.0
n-acetylglucosamine kinase,2,1,0.0	n-acetylglucosamine kinase	2	1	0.0
kinase selenocysteine,2,1,0.0	kinase selenocysteine	2	1	0.0
selenocysteine lyase,2,1,0.0	selenocysteine lyase	2	1	0.0
predicted sugar,2,1,0.0	predicted sugar	2	1	0.0
sugar phosphatases,2,1,0.0	sugar phosphatases	2	1	0.0
phosphatases superfamily,2,1,0.0	phosphatases superfamily	2	1	0.0
superfamily rhodanese-related,2,1,0.0	superfamily rhodanese-related	2	1	0.0
sulfurtransferase lysophospholipase,2,1,0.0	sulfurtransferase lysophospholipase	2	1	0.0
lysophospholipase uncharacterized,2,1,0.0	lysophospholipase uncharacterized	2	1	0.0
acid-binding thiol-disulfide,2,1,0.0	acid-binding thiol-disulfide	2	1	0.0
thiol-disulfide isomerase,2,1,0.0	thiol-disulfide isomerase	2	1	0.0
isomerase thioredoxins,2,1,0.0	isomerase thioredoxins	2	1	0.0
thioredoxins fog,2,1,0.0	thioredoxins fog	2	1	0.0
superfamily) 6-phosphofructokinase,2,1,0.0	superfamily) 6-phosphofructokinase	2	1	0.0
6-phosphofructokinase permeases,2,1,0.0	6-phosphofructokinase permeases	2	1	0.0
superfamily aspartyl-trna,2,1,0.0	superfamily aspartyl-trna	2	1	0.0
aspartyl-trna synthetase,2,1,0.0	aspartyl-trna synthetase	2	1	0.0
reductase uncharacterized,2,1,0.0	reductase uncharacterized	2	1	0.0
bacteria anthranilate/para-aminobenzoate,2,1,0.0	bacteria anthranilate/para-aminobenzoate	2	1	0.0
component valyl-trna,2,1,0.0	component valyl-trna	2	1	0.0
synthetase abc-type,2,1,0.0	synthetase abc-type	2	1	0.0
abc-type spermidine/putrescine,2,1,0.0	abc-type spermidine/putrescine	2	1	0.0
spermidine/putrescine transport,2,1,0.0	spermidine/putrescine transport	2	1	0.0
components membrane,2,1,0.0	components membrane	2	1	0.0
metalloendopeptidases predicted,2,1,0.0	metalloendopeptidases predicted	2	1	0.0
atpase pp-loop,2,1,0.0	atpase pp-loop	2	1	0.0
superfamily implicated,2,1,0.0	superfamily implicated	2	1	0.0
implicated cell,2,1,0.0	implicated cell	2	1	0.0
cell cycle,2,1,0.0	cell cycle	2	1	0.0
cycle control,2,1,0.0	cycle control	2	1	0.0
control phenylalanyl-trna,2,1,0.0	control phenylalanyl-trna	2	1	0.0
phenylalanyl-trna synthetase,2,1,0.0	phenylalanyl-trna synthetase	2	1	0.0
endonuclease phosphoribosylaminoimidazolesuccinocarboxamide,2,1,0.0	endonuclease phosphoribosylaminoimidazolesuccinocarboxamide	2	1	0.0
phosphoribosylaminoimidazolesuccinocarboxamide (saicar),2,1,0.0	phosphoribosylaminoimidazolesuccinocarboxamide (saicar)	2	1	0.0
(saicar) synthase,2,1,0.0	(saicar) synthase	2	1	0.0
synthase excinuclease,2,1,0.0	synthase excinuclease	2	1	0.0
excinuclease atpase,2,1,0.0	excinuclease atpase	2	1	0.0
atpase subunit,2,1,0.0	atpase subunit	2	1	0.0
regulators dna,2,1,0.0	regulators dna	2	1	0.0
repair proteins,2,1,0.0	repair proteins	2	1	0.0
proteins superfamily,2,1,0.0	proteins superfamily	2	1	0.0
helicases ribosomal,2,1,0.0	helicases ribosomal	2	1	0.0
protein s1,2,1,0.0	protein s1	2	1	0.0
s1 uncharacterized,2,1,0.0	s1 uncharacterized	2	1	0.0
proteins lmbe,2,1,0.0	proteins lmbe	2	1	0.0
lmbe homologs,2,1,0.0	lmbe homologs	2	1	0.0
homologs uncharacterized,2,1,0.0	homologs uncharacterized	2	1	0.0
protein von,2,1,0.0	protein von	2	1	0.0
von willebrand,2,1,0.0	von willebrand	2	1	0.0
willebrand factor,2,1,0.0	willebrand factor	2	1	0.0
factor type,2,1,0.0	factor type	2	1	0.0
type (vwa),2,1,0.0	type (vwa)	2	1	0.0
(vwa) domain,2,1,0.0	(vwa) domain	2	1	0.0
domain aspartate/tyrosine/aromatic,2,1,0.0	domain aspartate/tyrosine/aromatic	2	1	0.0
aspartate/tyrosine/aromatic aminotransferase,2,1,0.0	aspartate/tyrosine/aromatic aminotransferase	2	1	0.0
aminotransferase abc-type,2,1,0.0	aminotransferase abc-type	2	1	0.0
protein a/g-specific,2,1,0.0	protein a/g-specific	2	1	0.0
glycosylase oligoendopeptidase,2,1,0.0	glycosylase oligoendopeptidase	2	1	0.0
oligoendopeptidase pseudouridylate,2,1,0.0	oligoendopeptidase pseudouridylate	2	1	0.0
rna-specific uncharacterized,2,1,0.0	rna-specific uncharacterized	2	1	0.0
protein thymidylate,2,1,0.0	protein thymidylate	2	1	0.0
protein lactoylglutathione,2,1,0.0	protein lactoylglutathione	2	1	0.0
lyases glutamine,2,1,0.0	lyases glutamine	2	1	0.0
glutamine cyclotransferase,2,1,0.0	glutamine cyclotransferase	2	1	0.0
cyclotransferase udp-n-acetylmuramyl,2,1,0.0	cyclotransferase udp-n-acetylmuramyl	2	1	0.0
udp-n-acetylmuramyl tripeptide,2,1,0.0	udp-n-acetylmuramyl tripeptide	2	1	0.0
tripeptide synthase,2,1,0.0	tripeptide synthase	2	1	0.0
synthase rhodanese-related,2,1,0.0	synthase rhodanese-related	2	1	0.0
sulfurtransferase ketosteroid,2,1,0.0	sulfurtransferase ketosteroid	2	1	0.0
ketosteroid isomerase-related,2,1,0.0	ketosteroid isomerase-related	2	1	0.0
isomerase-related protein,2,1,0.0	isomerase-related protein	2	1	0.0
reductase thiamine,2,1,0.0	reductase thiamine	2	1	0.0
thiamine biosynthesis,2,1,0.0	thiamine biosynthesis	2	1	0.0
enzyme thih,2,1,0.0	enzyme thih	2	1	0.0
thih related,2,1,0.0	thih related	2	1	0.0
related uncharacterized,2,1,0.0	related uncharacterized	2	1	0.0
uncharacterized enzymes,2,1,0.0	uncharacterized enzymes	2	1	0.0
predicted 6-phosphogluconate,2,1,0.0	predicted 6-phosphogluconate	2	1	0.0
6-phosphogluconate dehydrogenase,2,1,0.0	6-phosphogluconate dehydrogenase	2	1	0.0
dehydrogenase serine-pyruvate,2,1,0.0	dehydrogenase serine-pyruvate	2	1	0.0
serine-pyruvate aminotransferase/archaeal,2,1,0.0	serine-pyruvate aminotransferase/archaeal	2	1	0.0
aminotransferase/archaeal aspartate,2,1,0.0	aminotransferase/archaeal aspartate	2	1	0.0
aspartate aminotransferase,2,1,0.0	aspartate aminotransferase	2	1	0.0
aminotransferase predicted,2,1,0.0	aminotransferase predicted	2	1	0.0
predicted periplasmic,2,1,0.0	predicted periplasmic	2	1	0.0
periplasmic solute-binding,2,1,0.0	periplasmic solute-binding	2	1	0.0
solute-binding protein,2,1,0.0	solute-binding protein	2	1	0.0
peptidases glucoamylase,2,1,0.0	peptidases glucoamylase	2	1	0.0
glucoamylase related,2,1,0.0	glucoamylase related	2	1	0.0
related glycosyl,2,1,0.0	related glycosyl	2	1	0.0
component glucose-6-p,2,1,0.0	component glucose-6-p	2	1	0.0
glucose-6-p dehydrogenase,2,1,0.0	glucose-6-p dehydrogenase	2	1	0.0
dehydrogenase subunit,2,1,0.0	dehydrogenase subunit	2	1	0.0
subunit 6-phosphogluconolactonase/glucosamine-6-phosphate,2,1,0.0	subunit 6-phosphogluconolactonase/glucosamine-6-phosphate	2	1	0.0
6-phosphogluconolactonase/glucosamine-6-phosphate isomerase/deaminase,2,1,0.0	6-phosphogluconolactonase/glucosamine-6-phosphate isomerase/deaminase	2	1	0.0
isomerase/deaminase uncharacterized,2,1,0.0	isomerase/deaminase uncharacterized	2	1	0.0
components glucose-6-phosphate,2,1,0.0	components glucose-6-phosphate	2	1	0.0
glucose-6-phosphate 1-dehydrogenase,2,1,0.0	glucose-6-phosphate 1-dehydrogenase	2	1	0.0
1-dehydrogenase dehydrogenases,2,1,0.0	1-dehydrogenase dehydrogenases	2	1	0.0
dehydrogenases) abc-type,2,1,0.0	dehydrogenases) abc-type	2	1	0.0
abc-type oligopeptide,2,1,0.0	abc-type oligopeptide	2	1	0.0
oligopeptide transport,2,1,0.0	oligopeptide transport	2	1	0.0
component dna,2,1,0.0	component dna	2	1	0.0
repair photolyase,2,1,0.0	repair photolyase	2	1	0.0
photolyase predicted,2,1,0.0	photolyase predicted	2	1	0.0
predicted kinase,2,1,0.0	predicted kinase	2	1	0.0
tripeptidases dna-directed,2,1,0.0	tripeptidases dna-directed	2	1	0.0
type) putative,2,1,0.0	type) putative	2	1	0.0
proteins dtdp-glucose,2,1,0.0	proteins dtdp-glucose	2	1	0.0
enzymes zn-ribbon,2,1,0.0	enzymes zn-ribbon	2	1	0.0
acid-binding homoserine,2,1,0.0	acid-binding homoserine	2	1	0.0
trans-succinylase uncharacterized,2,1,0.0	trans-succinylase uncharacterized	2	1	0.0
transporter superfamily,2,1,0.0	transporter superfamily	2	1	0.0
helicases endonuclease,2,1,0.0	helicases endonuclease	2	1	0.0
iv uncharacterized,2,1,0.0	iv uncharacterized	2	1	0.0
bacteria dtdp-d-glucose,2,1,0.0	bacteria dtdp-d-glucose	2	1	0.0
6-dehydratase glycyl-trna,2,1,0.0	6-dehydratase glycyl-trna	2	1	0.0
endonuclease penicillin,2,1,0.0	endonuclease penicillin	2	1	0.0
protein inorganic,2,1,0.0	protein inorganic	2	1	0.0
pyrophosphatase/exopolyphosphatase threonyl-trna,2,1,0.0	pyrophosphatase/exopolyphosphatase threonyl-trna	2	1	0.0
synthetase atpases,2,1,0.0	synthetase atpases	2	1	0.0
subunit uridine,2,1,0.0	subunit uridine	2	1	0.0
triphosphohydrolase predicted,2,1,0.0	triphosphohydrolase predicted	2	1	0.0
snrnp ribonuclease,2,1,0.0	snrnp ribonuclease	2	1	0.0
ribonuclease abc-type,2,1,0.0	ribonuclease abc-type	2	1	0.0
component lysophospholipase,2,1,0.0	component lysophospholipase	2	1	0.0
esterases uncharacterized,2,1,0.0	esterases uncharacterized	2	1	0.0
kinase gtpase,2,1,0.0	kinase gtpase	2	1	0.0
protein recombinational,2,1,0.0	protein recombinational	2	1	0.0
components parvulin-like,2,1,0.0	components parvulin-like	2	1	0.0
isomerase periplasmic,2,1,0.0	isomerase periplasmic	2	1	0.0
periplasmic glycine,2,1,0.0	periplasmic glycine	2	1	0.0
glycine betaine/choline-binding,2,1,0.0	glycine betaine/choline-binding	2	1	0.0
betaine/choline-binding (lipo)protein,2,1,0.0	betaine/choline-binding (lipo)protein	2	1	0.0
(lipo)protein abc-type,2,1,0.0	(lipo)protein abc-type	2	1	0.0
system (osmoprotectant,2,1,0.0	system (osmoprotectant	2	1	0.0
(osmoprotectant binding,2,1,0.0	(osmoprotectant binding	2	1	0.0
binding protein),2,1,0.0	binding protein)	2	1	0.0
protein) uncharacterized,2,1,0.0	protein) uncharacterized	2	1	0.0
peptidases uncharacterized,2,1,0.0	peptidases uncharacterized	2	1	0.0
superfamily dnaj-class,2,1,0.0	superfamily dnaj-class	2	1	0.0
dnaj-class molecular,2,1,0.0	dnaj-class molecular	2	1	0.0
chaperone c-terminal,2,1,0.0	chaperone c-terminal	2	1	0.0
c-terminal zn,2,1,0.0	c-terminal zn	2	1	0.0
zn finger,2,1,0.0	zn finger	2	1	0.0
finger domain,2,1,0.0	finger domain	2	1	0.0
domain nad-dependent,2,1,0.0	domain nad-dependent	2	1	0.0
ii) membrane,2,1,0.0	ii) membrane	2	1	0.0
lepa conserved,2,1,0.0	lepa conserved	2	1	0.0
family valyl-trna,2,1,0.0	family valyl-trna	2	1	0.0
enzyme aspartokinases,2,1,0.0	enzyme aspartokinases	2	1	0.0
aspartokinases fe2+/zn2+,2,1,0.0	aspartokinases fe2+/zn2+	2	1	0.0
proteins phosphate,2,1,0.0	proteins phosphate	2	1	0.0
phosphate starvation-inducible,2,1,0.0	phosphate starvation-inducible	2	1	0.0
starvation-inducible protein,2,1,0.0	starvation-inducible protein	2	1	0.0
protein phoh,2,1,0.0	protein phoh	2	1	0.0
phoh predicted,2,1,0.0	phoh predicted	2	1	0.0
atpase uncharacterized,2,1,0.0	atpase uncharacterized	2	1	0.0
bacteria transcriptional,2,1,0.0	bacteria transcriptional	2	1	0.0
regulator heat,2,1,0.0	regulator heat	2	1	0.0
shock gene,2,1,0.0	shock gene	2	1	0.0
gene predicted,2,1,0.0	gene predicted	2	1	0.0
hydrolase pyruvate-formate,2,1,0.0	hydrolase pyruvate-formate	2	1	0.0
pyruvate-formate lyase,2,1,0.0	pyruvate-formate lyase	2	1	0.0
lyase multimeric,2,1,0.0	lyase multimeric	2	1	0.0
wrba mismatch,2,1,0.0	wrba mismatch	2	1	0.0
repair atpase,2,1,0.0	repair atpase	2	1	0.0
atpase (muts,2,1,0.0	atpase (muts	2	1	0.0
(muts family),2,1,0.0	(muts family)	2	1	0.0
family) predicted,2,1,0.0	family) predicted	2	1	0.0
regulator nucleoside-diphosphate-sugar,2,1,0.0	regulator nucleoside-diphosphate-sugar	2	1	0.0
nucleoside-diphosphate-sugar epimerases,2,1,0.0	nucleoside-diphosphate-sugar epimerases	2	1	0.0
epimerases predicted,2,1,0.0	epimerases predicted	2	1	0.0
membrane metal-binding,2,1,0.0	membrane metal-binding	2	1	0.0
protein histone,2,1,0.0	protein histone	2	1	0.0
acetyltransferases 2-succinyl-6-hydroxy-2,2,1,0.0	acetyltransferases 2-succinyl-6-hydroxy-2	2	1	0.0
synthase superfamily,2,1,0.0	synthase superfamily	2	1	0.0
hydrolase hydroxymethylpyrimidine/phosphomethylpyrimidine,2,1,0.0	hydrolase hydroxymethylpyrimidine/phosphomethylpyrimidine	2	1	0.0
kinase predicted,2,1,0.0	kinase predicted	2	1	0.0
predicted nucleotide-utilizing,2,1,0.0	predicted nucleotide-utilizing	2	1	0.0
nucleotide-utilizing enzyme,2,1,0.0	nucleotide-utilizing enzyme	2	1	0.0
enzyme related,2,1,0.0	enzyme related	2	1	0.0
related molybdopterin-biosynthesis,2,1,0.0	related molybdopterin-biosynthesis	2	1	0.0
molybdopterin-biosynthesis enzyme,2,1,0.0	molybdopterin-biosynthesis enzyme	2	1	0.0
enzyme moea,2,1,0.0	enzyme moea	2	1	0.0
moea molecular,2,1,0.0	moea molecular	2	1	0.0
chaperone pyruvate/2-oxoglutarate,2,1,0.0	chaperone pyruvate/2-oxoglutarate	2	1	0.0
pyruvate/2-oxoglutarate dehydrogenase,2,1,0.0	pyruvate/2-oxoglutarate dehydrogenase	2	1	0.0
dehydrogenase complex,2,1,0.0	dehydrogenase complex	2	1	0.0
complex dihydrolipoamide,2,1,0.0	complex dihydrolipoamide	2	1	0.0
dihydrolipoamide dehydrogenase,2,1,0.0	dihydrolipoamide dehydrogenase	2	1	0.0
dehydrogenase (e3),2,1,0.0	dehydrogenase (e3)	2	1	0.0
(e3) component,2,1,0.0	(e3) component	2	1	0.0
enzymes l-alanine-dl-glutamate,2,1,0.0	enzymes l-alanine-dl-glutamate	2	1	0.0
hydrolase (metallo-beta-lactamase,2,1,0.0	hydrolase (metallo-beta-lactamase	2	1	0.0
(metallo-beta-lactamase superfamily),2,1,0.0	(metallo-beta-lactamase superfamily)	2	1	0.0
superfamily) adp-ribose,2,1,0.0	superfamily) adp-ribose	2	1	0.0
adp-ribose pyrophosphatase,2,1,0.0	adp-ribose pyrophosphatase	2	1	0.0
pyrophosphatase sh3,2,1,0.0	pyrophosphatase sh3	2	1	0.0
protein pyruvate-formate,2,1,0.0	protein pyruvate-formate	2	1	0.0
pyruvate-formate lyase-activating,2,1,0.0	pyruvate-formate lyase-activating	2	1	0.0
lyase-activating enzyme,2,1,0.0	lyase-activating enzyme	2	1	0.0
enzyme acetyl-coa,2,1,0.0	enzyme acetyl-coa	2	1	0.0
acetyl-coa acetyltransferase,2,1,0.0	acetyl-coa acetyltransferase	2	1	0.0
acetyltransferase molecular,2,1,0.0	acetyltransferase molecular	2	1	0.0
chaperone grpe,2,1,0.0	chaperone grpe	2	1	0.0
grpe (heat,2,1,0.0	grpe (heat	2	1	0.0
(heat shock,2,1,0.0	(heat shock	2	1	0.0
shock protein),2,1,0.0	shock protein)	2	1	0.0
protein) deoxycytidylate,2,1,0.0	protein) deoxycytidylate	2	1	0.0
deoxycytidylate deaminase,2,1,0.0	deoxycytidylate deaminase	2	1	0.0
deaminase permeases,2,1,0.0	deaminase permeases	2	1	0.0
superfamily sortase,2,1,0.0	superfamily sortase	2	1	0.0
sortase related,2,1,0.0	sortase related	2	1	0.0
related acyltransferases,2,1,0.0	related acyltransferases	2	1	0.0
acyltransferases glycerol-3-phosphate,2,1,0.0	acyltransferases glycerol-3-phosphate	2	1	0.0
glycerol-3-phosphate responsive,2,1,0.0	glycerol-3-phosphate responsive	2	1	0.0
responsive antiterminator,2,1,0.0	responsive antiterminator	2	1	0.0
antiterminator (mrna-binding),2,1,0.0	antiterminator (mrna-binding)	2	1	0.0
(mrna-binding) imidazolonepropionase,2,1,0.0	(mrna-binding) imidazolonepropionase	2	1	0.0
amidohydrolases abc-type,2,1,0.0	amidohydrolases abc-type	2	1	0.0
regulators transcriptional,2,1,0.0	regulators transcriptional	2	1	0.0
protein (competence-,2,1,0.0	protein (competence-	2	1	0.0
(competence- mitomycin-induced),2,1,0.0	(competence- mitomycin-induced)	2	1	0.0
mitomycin-induced) adenylate,2,1,0.0	mitomycin-induced) adenylate	2	1	0.0
adenylate kinase,2,1,0.0	adenylate kinase	2	1	0.0
kinase related,2,1,0.0	kinase related	2	1	0.0
related kinases,2,1,0.0	related kinases	2	1	0.0
kinases dna,2,1,0.0	kinases dna	2	1	0.0
dna uptake,2,1,0.0	dna uptake	2	1	0.0
uptake protein,2,1,0.0	uptake protein	2	1	0.0
protein related,2,1,0.0	protein related	2	1	0.0
related dna-binding,2,1,0.0	related dna-binding	2	1	0.0
dna-binding proteins,2,1,0.0	dna-binding proteins	2	1	0.0
proteins phosphatidylglycerophosphate,2,1,0.0	proteins phosphatidylglycerophosphate	2	1	0.0
phosphatidylglycerophosphate synthase,2,1,0.0	phosphatidylglycerophosphate synthase	2	1	0.0
synthase superoxide,2,1,0.0	synthase superoxide	2	1	0.0
dismutase atp-utilizing,2,1,0.0	dismutase atp-utilizing	2	1	0.0
components periplasmic,2,1,0.0	components periplasmic	2	1	0.0
protease dehydrogenases,2,1,0.0	protease dehydrogenases	2	1	0.0
dehydrogenases) uncharacterized,2,1,0.0	dehydrogenases) uncharacterized	2	1	0.0
bacteria ribosomal,2,1,0.0	bacteria ribosomal	2	1	0.0
protein l11,2,1,0.0	protein l11	2	1	0.0
l11 methylase,2,1,0.0	l11 methylase	2	1	0.0
methylase predicted,2,1,0.0	methylase predicted	2	1	0.0
predicted hd,2,1,0.0	predicted hd	2	1	0.0
hydrolase peroxiredoxin,2,1,0.0	hydrolase peroxiredoxin	2	1	0.0
peroxiredoxin predicted,2,1,0.0	peroxiredoxin predicted	2	1	0.0
regulators predicted,2,1,0.0	regulators predicted	2	1	0.0
superfamily) predicted,2,1,0.0	superfamily) predicted	2	1	0.0
hydrolase metallo-beta-lactamase,2,1,0.0	hydrolase metallo-beta-lactamase	2	1	0.0
metallo-beta-lactamase superfamily,2,1,0.0	metallo-beta-lactamase superfamily	2	1	0.0
superfamily udp-n-acetylmuramate,2,1,0.0	superfamily udp-n-acetylmuramate	2	1	0.0
udp-n-acetylmuramate dehydrogenase,2,1,0.0	udp-n-acetylmuramate dehydrogenase	2	1	0.0
dehydrogenase abc-type,2,1,0.0	dehydrogenase abc-type	2	1	0.0
component diacylglycerol,2,1,0.0	component diacylglycerol	2	1	0.0
kinase ntp,2,1,0.0	kinase ntp	2	1	0.0
enzymes ribosomal,2,1,0.0	enzymes ribosomal	2	1	0.0
protein s20,2,1,0.0	protein s20	2	1	0.0
s20 3-methyladenine,2,1,0.0	s20 3-methyladenine	2	1	0.0
glycosylase na+/melibiose,2,1,0.0	glycosylase na+/melibiose	2	1	0.0
protein enzyme,2,1,0.0	protein enzyme	2	1	0.0
enzyme involved,2,1,0.0	enzyme involved	2	1	0.0
involved deoxyxylulose,2,1,0.0	involved deoxyxylulose	2	1	0.0
deoxyxylulose pathway,2,1,0.0	deoxyxylulose pathway	2	1	0.0
pathway isoprenoid,2,1,0.0	pathway isoprenoid	2	1	0.0
isoprenoid biosynthesis,2,1,0.0	isoprenoid biosynthesis	2	1	0.0
biosynthesis collagenase,2,1,0.0	biosynthesis collagenase	2	1	0.0
proteases ribosomal,2,1,0.0	proteases ribosomal	2	1	0.0
protein s21,2,1,0.0	protein s21	2	1	0.0
s21 atpase,2,1,0.0	s21 atpase	2	1	0.0
components abc,2,1,0.0	components abc	2	1	0.0
abc transporters,2,1,0.0	abc transporters	2	1	0.0
transporters duplicated,2,1,0.0	transporters duplicated	2	1	0.0
duplicated atpase,2,1,0.0	duplicated atpase	2	1	0.0
atpase domains,2,1,0.0	atpase domains	2	1	0.0
domains glycopeptide,2,1,0.0	domains glycopeptide	2	1	0.0
glycopeptide antibiotics,2,1,0.0	glycopeptide antibiotics	2	1	0.0
antibiotics resistance,2,1,0.0	antibiotics resistance	2	1	0.0
resistance protein,2,1,0.0	resistance protein	2	1	0.0
superfamily) cell,2,1,0.0	superfamily) cell	2	1	0.0
division protein,2,1,0.0	division protein	2	1	0.0
protein ftsi/penicillin-binding,2,1,0.0	protein ftsi/penicillin-binding	2	1	0.0
ftsi/penicillin-binding protein,2,1,0.0	ftsi/penicillin-binding protein	2	1	0.0
protein 2,2,1,0.0	protein 2	2	1	0.0
2 predicted,2,1,0.0	2 predicted	2	1	0.0
predicted branched-chain,2,1,0.0	predicted branched-chain	2	1	0.0
acid permease,2,1,0.0	acid permease	2	1	0.0
permease (azaleucine,2,1,0.0	permease (azaleucine	2	1	0.0
(azaleucine resistance),2,1,0.0	(azaleucine resistance)	2	1	0.0
resistance) a/g-specific,2,1,0.0	resistance) a/g-specific	2	1	0.0
glycosylase predicted,2,1,0.0	glycosylase predicted	2	1	0.0
permease dihydrodipicolinate,2,1,0.0	permease dihydrodipicolinate	2	1	0.0
dihydrodipicolinate synthase/n-acetylneuraminate,2,1,0.0	dihydrodipicolinate synthase/n-acetylneuraminate	2	1	0.0
synthase/n-acetylneuraminate lyase,2,1,0.0	synthase/n-acetylneuraminate lyase	2	1	0.0
protein permeases,2,1,0.0	protein permeases	2	1	0.0
protein 3-hydroxy-3-methylglutaryl,2,1,0.0	protein 3-hydroxy-3-methylglutaryl	2	1	0.0
3-hydroxy-3-methylglutaryl coa,2,1,0.0	3-hydroxy-3-methylglutaryl coa	2	1	0.0
coa synthase,2,1,0.0	coa synthase	2	1	0.0
synthase mn2+,2,1,0.0	synthase mn2+	2	1	0.0
mn2+ fe2+,2,1,0.0	mn2+ fe2+	2	1	0.0
fe2+ transporters,2,1,0.0	fe2+ transporters	2	1	0.0
transporters nramp,2,1,0.0	transporters nramp	2	1	0.0
nramp family,2,1,0.0	nramp family	2	1	0.0
family reca/rada,2,1,0.0	family reca/rada	2	1	0.0
reca/rada recombinase,2,1,0.0	reca/rada recombinase	2	1	0.0
recombinase amino,2,1,0.0	recombinase amino	2	1	0.0
methylase coproporphyrinogen,2,1,0.0	methylase coproporphyrinogen	2	1	0.0
coproporphyrinogen iii,2,1,0.0	coproporphyrinogen iii	2	1	0.0
iii oxidase,2,1,0.0	iii oxidase	2	1	0.0
oxidase related,2,1,0.0	oxidase related	2	1	0.0
related fe-s,2,1,0.0	related fe-s	2	1	0.0
fe-s oxidoreductases,2,1,0.0	fe-s oxidoreductases	2	1	0.0
oxidoreductases uncharacterized,2,1,0.0	oxidoreductases uncharacterized	2	1	0.0
x) predicted,2,1,0.0	x) predicted	2	1	0.0
predicted membrane-associated,2,1,0.0	predicted membrane-associated	2	1	0.0
membrane-associated hd,2,1,0.0	membrane-associated hd	2	1	0.0
hydrolase aspartate-semialdehyde,2,1,0.0	hydrolase aspartate-semialdehyde	2	1	0.0
aspartate-semialdehyde dehydrogenase,2,1,0.0	aspartate-semialdehyde dehydrogenase	2	1	0.0
dehydrogenase dna,2,1,0.0	dehydrogenase dna	2	1	0.0
polymerase iii,2,1,0.0	polymerase iii	2	1	0.0
iii delta,2,1,0.0	iii delta	2	1	0.0
subunit cytidine,2,1,0.0	subunit cytidine	2	1	0.0
cytidine deaminase,2,1,0.0	cytidine deaminase	2	1	0.0
deaminase predicted,2,1,0.0	deaminase predicted	2	1	0.0
predicted outer,2,1,0.0	predicted outer	2	1	0.0
superfamily fog,2,1,0.0	superfamily fog	2	1	0.0
repeat dna,2,1,0.0	repeat dna	2	1	0.0
dna mismatch,2,1,0.0	dna mismatch	2	1	0.0
enzyme (predicted,2,1,0.0	enzyme (predicted	2	1	0.0
(predicted atpase),2,1,0.0	(predicted atpase)	2	1	0.0
atpase) uncharacterized,2,1,0.0	atpase) uncharacterized	2	1	0.0
tripeptidases dtdp-4-dehydrorhamnose,2,1,0.0	tripeptidases dtdp-4-dehydrorhamnose	2	1	0.0
enzymes dtdp-glucose,2,1,0.0	enzymes dtdp-glucose	2	1	0.0
pyrophosphorylase putative,2,1,0.0	pyrophosphorylase putative	2	1	0.0
proteins dtdp-d-glucose,2,1,0.0	proteins dtdp-d-glucose	2	1	0.0
6-dehydratase predicted,2,1,0.0	6-dehydratase predicted	2	1	0.0
endonuclease dna-directed,2,1,0.0	endonuclease dna-directed	2	1	0.0
(sigma70/sigma32) homoserine,2,1,0.0	(sigma70/sigma32) homoserine	2	1	0.0
trans-succinylase superfamily,2,1,0.0	trans-succinylase superfamily	2	1	0.0
helicases dna,2,1,0.0	helicases dna	2	1	0.0
type) endonuclease,2,1,0.0	type) endonuclease	2	1	0.0
iv atpases,2,1,0.0	iv atpases	2	1	0.0
transporter uncharacterized,2,1,0.0	transporter uncharacterized	2	1	0.0
bacteria cytochrome,2,1,0.0	bacteria cytochrome	2	1	0.0
subunit inorganic,2,1,0.0	subunit inorganic	2	1	0.0
pyrophosphatase/exopolyphosphatase lysophospholipase,2,1,0.0	pyrophosphatase/exopolyphosphatase lysophospholipase	2	1	0.0
esterases abc-type,2,1,0.0	esterases abc-type	2	1	0.0
component aldo/keto,2,1,0.0	component aldo/keto	2	1	0.0
aldo/keto reductases,2,1,0.0	aldo/keto reductases	2	1	0.0
reductases related,2,1,0.0	reductases related	2	1	0.0
related diketogulonate,2,1,0.0	related diketogulonate	2	1	0.0
diketogulonate reductase,2,1,0.0	diketogulonate reductase	2	1	0.0
reductase parvulin-like,2,1,0.0	reductase parvulin-like	2	1	0.0
isomerase penicillin,2,1,0.0	isomerase penicillin	2	1	0.0
protein ntp,2,1,0.0	protein ntp	2	1	0.0
enzymes abc-type,2,1,0.0	enzymes abc-type	2	1	0.0
components d-mannonate,2,1,0.0	components d-mannonate	2	1	0.0
dehydratase conserved,2,1,0.0	dehydratase conserved	2	1	0.0
protein fe2+/zn2+,2,1,0.0	protein fe2+/zn2+	2	1	0.0
proteins transcriptional,2,1,0.0	proteins transcriptional	2	1	0.0
regulators dehydrogenases,2,1,0.0	regulators dehydrogenases	2	1	0.0
dehydrogenases) predicted,2,1,0.0	dehydrogenases) predicted	2	1	0.0
superfamily) 2-succinyl-6-hydroxy-2,2,1,0.0	superfamily) 2-succinyl-6-hydroxy-2	2	1	0.0
bacteria hydroxymethylpyrimidine/phosphomethylpyrimidine,2,1,0.0	bacteria hydroxymethylpyrimidine/phosphomethylpyrimidine	2	1	0.0
kinase membrane,2,1,0.0	kinase membrane	2	1	0.0
required beta-lactamase,2,1,0.0	required beta-lactamase	2	1	0.0
beta-lactamase induction,2,1,0.0	beta-lactamase induction	2	1	0.0
induction uncharacterized,2,1,0.0	induction uncharacterized	2	1	0.0
superfamily l-alanine-dl-glutamate,2,1,0.0	superfamily l-alanine-dl-glutamate	2	1	0.0
superfamily membrane,2,1,0.0	superfamily membrane	2	1	0.0
lepa ferredoxin,2,1,0.0	lepa ferredoxin	2	1	0.0
ferredoxin predicted,2,1,0.0	ferredoxin predicted	2	1	0.0
protein amino,2,1,0.0	protein amino	2	1	0.0
4-epimerase glycosyltransferases,2,1,0.0	4-epimerase glycosyltransferases	2	1	0.0
biogenesis serine/threonine,2,1,0.0	biogenesis serine/threonine	2	1	0.0
fog cbs,2,1,0.0	fog cbs	2	1	0.0
cbs domain,2,1,0.0	cbs domain	2	1	0.0
domain periplasmic,2,1,0.0	domain periplasmic	2	1	0.0
protease fog,2,1,0.0	protease fog	2	1	0.0
repeat peroxiredoxin,2,1,0.0	repeat peroxiredoxin	2	1	0.0
peroxiredoxin uncharacterized,2,1,0.0	peroxiredoxin uncharacterized	2	1	0.0
acid-binding dna-directed,2,1,0.0	acid-binding dna-directed	2	1	0.0
type) predicted,2,1,0.0	type) predicted	2	1	0.0
kinase threonyl-trna,2,1,0.0	kinase threonyl-trna	2	1	0.0
synthetase nad-dependent,2,1,0.0	synthetase nad-dependent	2	1	0.0
ii) uridine,2,1,0.0	ii) uridine	2	1	0.0
triphosphohydrolase uncharacterized,2,1,0.0	triphosphohydrolase uncharacterized	2	1	0.0
protein ribonuclease,2,1,0.0	protein ribonuclease	2	1	0.0
ribonuclease predicted,2,1,0.0	ribonuclease predicted	2	1	0.0
snrnp multimeric,2,1,0.0	snrnp multimeric	2	1	0.0
wrba valyl-trna,2,1,0.0	wrba valyl-trna	2	1	0.0
synthetase 3-methyladenine,2,1,0.0	synthetase 3-methyladenine	2	1	0.0
glycosylase abc-type,2,1,0.0	glycosylase abc-type	2	1	0.0
components collagenase,2,1,0.0	components collagenase	2	1	0.0
proteases transcriptional,2,1,0.0	proteases transcriptional	2	1	0.0
components arylsulfatase,2,1,0.0	components arylsulfatase	2	1	0.0
arylsulfatase regulator,2,1,0.0	arylsulfatase regulator	2	1	0.0
regulator (fe-s,2,1,0.0	regulator (fe-s	2	1	0.0
(fe-s oxidoreductase),2,1,0.0	(fe-s oxidoreductase)	2	1	0.0
oxidoreductase) predicted,2,1,0.0	oxidoreductase) predicted	2	1	0.0
superfamily) histone,2,1,0.0	superfamily) histone	2	1	0.0
acetyltransferases abc-type,2,1,0.0	acetyltransferases abc-type	2	1	0.0
component enterochelin,2,1,0.0	component enterochelin	2	1	0.0
enterochelin esterase,2,1,0.0	enterochelin esterase	2	1	0.0
esterase related,2,1,0.0	esterase related	2	1	0.0
enzymes na+/melibiose,2,1,0.0	enzymes na+/melibiose	2	1	0.0
methylase uncharacterized,2,1,0.0	methylase uncharacterized	2	1	0.0
x) imidazolonepropionase,2,1,0.0	x) imidazolonepropionase	2	1	0.0
amidohydrolases regulator,2,1,0.0	amidohydrolases regulator	2	1	0.0
regulator cell,2,1,0.0	regulator cell	2	1	0.0
cell morphogenesis,2,1,0.0	cell morphogenesis	2	1	0.0
morphogenesis signaling,2,1,0.0	morphogenesis signaling	2	1	0.0
signaling predicted,2,1,0.0	signaling predicted	2	1	0.0
superfamily) sh3,2,1,0.0	superfamily) sh3	2	1	0.0
protein atp-utilizing,2,1,0.0	protein atp-utilizing	2	1	0.0
superfamily a/g-specific,2,1,0.0	superfamily a/g-specific	2	1	0.0
glycosylase preprotein,2,1,0.0	glycosylase preprotein	2	1	0.0
preprotein translocase,2,1,0.0	preprotein translocase	2	1	0.0
translocase subunit,2,1,0.0	translocase subunit	2	1	0.0
subunit secg,2,1,0.0	subunit secg	2	1	0.0
secg predicted,2,1,0.0	secg predicted	2	1	0.0
methyltransferase uncharacterized,2,1,0.0	methyltransferase uncharacterized	2	1	0.0
hydrolase cobyrinic,2,1,0.0	hydrolase cobyrinic	2	1	0.0
cobyrinic acid,2,1,0.0	cobyrinic acid	2	1	0.0
acid c-diamide,2,1,0.0	acid c-diamide	2	1	0.0
c-diamide synthase,2,1,0.0	c-diamide synthase	2	1	0.0
(sigma70/sigma32) protein,2,1,0.0	(sigma70/sigma32) protein	2	1	0.0
protein involved,2,1,0.0	protein involved	2	1	0.0
involved propanediol,2,1,0.0	involved propanediol	2	1	0.0
propanediol utilization,2,1,0.0	propanediol utilization	2	1	0.0
utilization related,2,1,0.0	utilization related	2	1	0.0
proteins (includes,2,1,0.0	proteins (includes	2	1	0.0
(includes coumermycin,2,1,0.0	(includes coumermycin	2	1	0.0
coumermycin biosynthetic,2,1,0.0	coumermycin biosynthetic	2	1	0.0
biosynthetic protein),2,1,0.0	biosynthetic protein)	2	1	0.0
protein) kinase,2,1,0.0	protein) kinase	2	1	0.0
kinase thiamine,2,1,0.0	kinase thiamine	2	1	0.0
synthase acetyltransferase,2,1,0.0	synthase acetyltransferase	2	1	0.0
superfamily) histidinol-phosphate/aromatic,2,1,0.0	superfamily) histidinol-phosphate/aromatic	2	1	0.0
decarboxylase fructose-2,2,1,0.0	decarboxylase fructose-2	2	1	0.0
6-bisphosphatase uncharacterized,2,1,0.0	6-bisphosphatase uncharacterized	2	1	0.0
(sigma70/sigma32) dna-directed,2,1,0.0	(sigma70/sigma32) dna-directed	2	1	0.0
polymerase specialized,2,1,0.0	polymerase specialized	2	1	0.0
specialized sigma,2,1,0.0	specialized sigma	2	1	0.0
subunit parvulin-like,2,1,0.0	subunit parvulin-like	2	1	0.0
isomerase dna,2,1,0.0	isomerase dna	2	1	0.0
type) uncharacterized,2,1,0.0	type) uncharacterized	2	1	0.0
protein branched-chain,2,1,0.0	protein branched-chain	2	1	0.0
lyase leucyl,2,1,0.0	lyase leucyl	2	1	0.0
leucyl aminopeptidase,2,1,0.0	leucyl aminopeptidase	2	1	0.0
aminopeptidase (aminopeptidase,2,1,0.0	aminopeptidase (aminopeptidase	2	1	0.0
(aminopeptidase t),2,1,0.0	(aminopeptidase t)	2	1	0.0
t) anthranilate/para-aminobenzoate,2,1,0.0	t) anthranilate/para-aminobenzoate	2	1	0.0
component fog,2,1,0.0	component fog	2	1	0.0
fog fha,2,1,0.0	fog fha	2	1	0.0
fha domain,2,1,0.0	fha domain	2	1	0.0
domain fog,2,1,0.0	domain fog	2	1	0.0
fog heat,2,1,0.0	fog heat	2	1	0.0
heat repeat,2,1,0.0	heat repeat	2	1	0.0
predicted dehydrogenases,2,1,0.0	predicted dehydrogenases	2	1	0.0
dehydrogenases related,2,1,0.0	dehydrogenases related	2	1	0.0
proteins 7,2,1,0.0	proteins 7	2	1	0.0
acid-binding formamidopyrimidine-dna,2,1,0.0	acid-binding formamidopyrimidine-dna	2	1	0.0
glycosylase 3-deoxy-d-manno-octulosonic-acid,2,1,0.0	glycosylase 3-deoxy-d-manno-octulosonic-acid	2	1	0.0
transferase pseudouridylate,2,1,0.0	transferase pseudouridylate	2	1	0.0
rna-specific glycyl-trna,2,1,0.0	rna-specific glycyl-trna	2	1	0.0
subunit glycerol-3-phosphate,2,1,0.0	subunit glycerol-3-phosphate	2	1	0.0
nitroreductase prolipoprotein,2,1,0.0	nitroreductase prolipoprotein	2	1	0.0
diacylglyceryltransferase deoxyribodipyrimidine,2,1,0.0	diacylglyceryltransferase deoxyribodipyrimidine	2	1	0.0
protein collagenase,2,1,0.0	protein collagenase	2	1	0.0
proteases predicted,2,1,0.0	proteases predicted	2	1	0.0
protein phosphoribosylcarboxyaminoimidazole,2,1,0.0	protein phosphoribosylcarboxyaminoimidazole	2	1	0.0
domain) predicted,2,1,0.0	domain) predicted	2	1	0.0
superfamily sam-dependent,2,1,0.0	superfamily sam-dependent	2	1	0.0
methyltransferases signal,2,1,0.0	methyltransferases signal	2	1	0.0
trna-(guanine-n1)-methyltransferase abc-type,2,1,0.0	trna-(guanine-n1)-methyltransferase abc-type	2	1	0.0
transferase ribosomal,2,1,0.0	transferase ribosomal	2	1	0.0
s16 rimm,2,1,0.0	s16 rimm	2	1	0.0
processing abc-type,2,1,0.0	processing abc-type	2	1	0.0
(dynamin-related) anti-anti-sigma,2,1,0.0	(dynamin-related) anti-anti-sigma	2	1	0.0
factor) homoserine,2,1,0.0	factor) homoserine	2	1	0.0
trans-succinylase o-acetylhomoserine,2,1,0.0	trans-succinylase o-acetylhomoserine	2	1	0.0
sulfhydrylase pyridoxal,2,1,0.0	sulfhydrylase pyridoxal	2	1	0.0
protein zn-dependent,2,1,0.0	protein zn-dependent	2	1	0.0
glyoxylases outer,2,1,0.0	glyoxylases outer	2	1	0.0
lipoprotein acyl,2,1,0.0	lipoprotein acyl	2	1	0.0
protein glutathione,2,1,0.0	protein glutathione	2	1	0.0
s-transferase 2c-methyl-d-erythritol,2,1,0.0	s-transferase 2c-methyl-d-erythritol	2	1	0.0
synthase cytochrome,2,1,0.0	synthase cytochrome	2	1	0.0
c1 amino,2,1,0.0	c1 amino	2	1	0.0
ligase high-affinity,2,1,0.0	ligase high-affinity	2	1	0.0
chain osmosensitive,2,1,0.0	chain osmosensitive	2	1	0.0
kinase integrase,2,1,0.0	kinase integrase	2	1	0.0
integrase phosphomannomutase,2,1,0.0	integrase phosphomannomutase	2	1	0.0
phosphomannomutase abc-type,2,1,0.0	phosphomannomutase abc-type	2	1	0.0
s9 arginine/lysine/ornithine,2,1,0.0	s9 arginine/lysine/ornithine	2	1	0.0
decarboxylases phosphopantothenoylcysteine,2,1,0.0	decarboxylases phosphopantothenoylcysteine	2	1	0.0
synthetase/decarboxylase response,2,1,0.0	synthetase/decarboxylase response	2	1	0.0
domain acetylglutamate,2,1,0.0	domain acetylglutamate	2	1	0.0
acetylglutamate kinase,2,1,0.0	acetylglutamate kinase	2	1	0.0
chain superfamily,2,1,0.0	chain superfamily	2	1	0.0
helicases dutpase,2,1,0.0	helicases dutpase	2	1	0.0
dutpase histidinol-phosphate/aromatic,2,1,0.0	dutpase histidinol-phosphate/aromatic	2	1	0.0
decarboxylase transcriptional,2,1,0.0	decarboxylase transcriptional	2	1	0.0
regulator stress-induced,2,1,0.0	regulator stress-induced	2	1	0.0
unknown) lactate,2,1,0.0	unknown) lactate	2	1	0.0
lactate dehydrogenase,2,1,0.0	lactate dehydrogenase	2	1	0.0
related dehydrogenases,2,1,0.0	related dehydrogenases	2	1	0.0
dehydrogenases dipeptide/tripeptide,2,1,0.0	dehydrogenases dipeptide/tripeptide	2	1	0.0
permease glutamyl-,2,1,0.0	permease glutamyl-	2	1	0.0
synthetases phosphotransferase,2,1,0.0	synthetases phosphotransferase	2	1	0.0
proteins protein,2,1,0.0	proteins protein	2	1	0.0
recombination histidinol,2,1,0.0	recombination histidinol	2	1	0.0
dehydrogenase permeases,2,1,0.0	dehydrogenase permeases	2	1	0.0
domain) phosphoenolpyruvate-protein,2,1,0.0	domain) phosphoenolpyruvate-protein	2	1	0.0
bacteria) predicted,2,1,0.0	bacteria) predicted	2	1	0.0
regulator hypoxanthine-guanine,2,1,0.0	regulator hypoxanthine-guanine	2	1	0.0
phosphoribosyltransferase 4-diphosphocytidyl-2-methyl-d-erithritol,2,1,0.0	phosphoribosyltransferase 4-diphosphocytidyl-2-methyl-d-erithritol	2	1	0.0
synthase abc-type,2,1,0.0	synthase abc-type	2	1	0.0
component cysteinyl-trna,2,1,0.0	component cysteinyl-trna	2	1	0.0
synthetase stringent,2,1,0.0	synthetase stringent	2	1	0.0
protein response,2,1,0.0	protein response	2	1	0.0
domain atp,2,1,0.0	domain atp	2	1	0.0
phosphoribosyltransferase low-affinity,2,1,0.0	phosphoribosyltransferase low-affinity	2	1	0.0
phosphodiesterase glutaredoxin,2,1,0.0	phosphodiesterase glutaredoxin	2	1	0.0
proteins k+-transporting,2,1,0.0	proteins k+-transporting	2	1	0.0
chain uncharacterized,2,1,0.0	chain uncharacterized	2	1	0.0
protein pyridoxal,2,1,0.0	protein pyridoxal	2	1	0.0
c1 permeases,2,1,0.0	c1 permeases	2	1	0.0
superfamily glutathione,2,1,0.0	superfamily glutathione	2	1	0.0
s-transferase cytochrome,2,1,0.0	s-transferase cytochrome	2	1	0.0
s9 zn-dependent,2,1,0.0	s9 zn-dependent	2	1	0.0
glyoxylases 2-keto-4-pentenoate,2,1,0.0	glyoxylases 2-keto-4-pentenoate	2	1	0.0
2-keto-4-pentenoate hydratase/2-oxohepta-3-ene-1,2,1,0.0	2-keto-4-pentenoate hydratase/2-oxohepta-3-ene-1	2	1	0.0
hydratase/2-oxohepta-3-ene-1 7-dioic,2,1,0.0	hydratase/2-oxohepta-3-ene-1 7-dioic	2	1	0.0
7-dioic acid,2,1,0.0	7-dioic acid	2	1	0.0
acid hydratase,2,1,0.0	acid hydratase	2	1	0.0
hydratase (catechol,2,1,0.0	hydratase (catechol	2	1	0.0
(catechol pathway),2,1,0.0	(catechol pathway)	2	1	0.0
pathway) uncharacterized,2,1,0.0	pathway) uncharacterized	2	1	0.0
ligase transcriptional,2,1,0.0	ligase transcriptional	2	1	0.0
regulator stringent,2,1,0.0	regulator stringent	2	1	0.0
protein transposase,2,1,0.0	protein transposase	2	1	0.0
transposase inactivated,2,1,0.0	transposase inactivated	2	1	0.0
inactivated derivatives,2,1,0.0	inactivated derivatives	2	1	0.0
derivatives is5,2,1,0.0	derivatives is5	2	1	0.0
is5 family,2,1,0.0	is5 family	2	1	0.0
family response,2,1,0.0	family response	2	1	0.0
domain ribosome-associated,2,1,0.0	domain ribosome-associated	2	1	0.0
ribosome-associated heat,2,1,0.0	ribosome-associated heat	2	1	0.0
shock protein,2,1,0.0	shock protein	2	1	0.0
protein implicated,2,1,0.0	protein implicated	2	1	0.0
implicated recycling,2,1,0.0	implicated recycling	2	1	0.0
recycling 50s,2,1,0.0	recycling 50s	2	1	0.0
50s subunit,2,1,0.0	50s subunit	2	1	0.0
subunit (s4,2,1,0.0	subunit (s4	2	1	0.0
(s4 paralog),2,1,0.0	(s4 paralog)	2	1	0.0
paralog) phosphoenolpyruvate-protein,2,1,0.0	paralog) phosphoenolpyruvate-protein	2	1	0.0
bacteria) hypoxanthine-guanine,2,1,0.0	bacteria) hypoxanthine-guanine	2	1	0.0
phosphoribosyltransferase uncharacterized,2,1,0.0	phosphoribosyltransferase uncharacterized	2	1	0.0
bacteria nicotinate-nucleotide,2,1,0.0	bacteria nicotinate-nucleotide	2	1	0.0
nicotinate-nucleotide pyrophosphorylase,2,1,0.0	nicotinate-nucleotide pyrophosphorylase	2	1	0.0
pyrophosphorylase cell,2,1,0.0	pyrophosphorylase cell	2	1	0.0
cell shape-determining,2,1,0.0	cell shape-determining	2	1	0.0
shape-determining protein,2,1,0.0	shape-determining protein	2	1	0.0
protein phosphoenolpyruvate,2,1,0.0	protein phosphoenolpyruvate	2	1	0.0
phosphoenolpyruvate carboxylase,2,1,0.0	phosphoenolpyruvate carboxylase	2	1	0.0
carboxylase phosphotransferase,2,1,0.0	carboxylase phosphotransferase	2	1	0.0
proteins glycerol-3-phosphate,2,1,0.0	proteins glycerol-3-phosphate	2	1	0.0
dehydrogenase membrane-bound,2,1,0.0	dehydrogenase membrane-bound	2	1	0.0
membrane-bound lytic,2,1,0.0	membrane-bound lytic	2	1	0.0
lytic murein,2,1,0.0	lytic murein	2	1	0.0
murein transglycosylase,2,1,0.0	murein transglycosylase	2	1	0.0
transglycosylase uncharacterized,2,1,0.0	transglycosylase uncharacterized	2	1	0.0
acid-binding 2c-methyl-d-erythritol,2,1,0.0	acid-binding 2c-methyl-d-erythritol	2	1	0.0
synthase 4-diphosphocytidyl-2-methyl-d-erithritol,2,1,0.0	synthase 4-diphosphocytidyl-2-methyl-d-erithritol	2	1	0.0
synthase ribonuclease,2,1,0.0	synthase ribonuclease	2	1	0.0
ribonuclease glutamyl-,2,1,0.0	ribonuclease glutamyl-	2	1	0.0
synthetases fog,2,1,0.0	synthetases fog	2	1	0.0
repeat cysteinyl-trna,2,1,0.0	repeat cysteinyl-trna	2	1	0.0
synthetase uncharacterized,2,1,0.0	synthetase uncharacterized	2	1	0.0
acid-binding 3-deoxy-d-manno-octulosonic-acid,2,1,0.0	acid-binding 3-deoxy-d-manno-octulosonic-acid	2	1	0.0
transferase glycyl-trna,2,1,0.0	transferase glycyl-trna	2	1	0.0
subunit pseudouridylate,2,1,0.0	subunit pseudouridylate	2	1	0.0
rna-specific prolipoprotein,2,1,0.0	rna-specific prolipoprotein	2	1	0.0
diacylglyceryltransferase glycerol-3-phosphate,2,1,0.0	diacylglyceryltransferase glycerol-3-phosphate	2	1	0.0
nitroreductase collagenase,2,1,0.0	nitroreductase collagenase	2	1	0.0
proteases phosphoribosylcarboxyaminoimidazole,2,1,0.0	proteases phosphoribosylcarboxyaminoimidazole	2	1	0.0
atpases signal,2,1,0.0	atpases signal	2	1	0.0
s16 predicted,2,1,0.0	s16 predicted	2	1	0.0
domain) ribosomal,2,1,0.0	domain) ribosomal	2	1	0.0
trna-(guanine-n1)-methyltransferase rimm,2,1,0.0	trna-(guanine-n1)-methyltransferase rimm	2	1	0.0
processing predicted,2,1,0.0	processing predicted	2	1	0.0
(dynamin-related) glutaredoxin,2,1,0.0	(dynamin-related) glutaredoxin	2	1	0.0
proteins homoserine,2,1,0.0	proteins homoserine	2	1	0.0
trans-succinylase fog,2,1,0.0	trans-succinylase fog	2	1	0.0
repeat o-acetylhomoserine,2,1,0.0	repeat o-acetylhomoserine	2	1	0.0
sulfhydrylase uncharacterized,2,1,0.0	sulfhydrylase uncharacterized	2	1	0.0
helicases acyl,2,1,0.0	helicases acyl	2	1	0.0
protein membrane,2,1,0.0	protein membrane	2	1	0.0
metalloendopeptidases pseudouridine,2,1,0.0	metalloendopeptidases pseudouridine	2	1	0.0
pseudouridine synthase,2,1,0.0	pseudouridine synthase	2	1	0.0
bacteria carbon,2,1,0.0	bacteria carbon	2	1	0.0
carbon storage,2,1,0.0	carbon storage	2	1	0.0
storage regulator,2,1,0.0	storage regulator	2	1	0.0
regulator (could,2,1,0.0	regulator (could	2	1	0.0
(could regulate,2,1,0.0	(could regulate	2	1	0.0
regulate swarming,2,1,0.0	regulate swarming	2	1	0.0
swarming quorum,2,1,0.0	swarming quorum	2	1	0.0
quorum sensing),2,1,0.0	quorum sensing)	2	1	0.0
sensing) 4-diphosphocytidyl-2c-methyl-d-erythritol,2,1,0.0	sensing) 4-diphosphocytidyl-2c-methyl-d-erythritol	2	1	0.0
4-diphosphocytidyl-2c-methyl-d-erythritol 2-phosphate,2,1,0.0	4-diphosphocytidyl-2c-methyl-d-erythritol 2-phosphate	2	1	0.0
2-phosphate synthase,2,1,0.0	2-phosphate synthase	2	1	0.0
synthase tmrna-binding,2,1,0.0	synthase tmrna-binding	2	1	0.0
tmrna-binding protein,2,1,0.0	tmrna-binding protein	2	1	0.0
protein 3-deoxy-d-arabino-heptulosonate,2,1,0.0	protein 3-deoxy-d-arabino-heptulosonate	2	1	0.0
3-deoxy-d-arabino-heptulosonate 7-phosphate,2,1,0.0	3-deoxy-d-arabino-heptulosonate 7-phosphate	2	1	0.0
7-phosphate (dahp),2,1,0.0	7-phosphate (dahp)	2	1	0.0
(dahp) synthase,2,1,0.0	(dahp) synthase	2	1	0.0
synthase outer,2,1,0.0	synthase outer	2	1	0.0
uncharacterized homolog,2,1,0.0	uncharacterized homolog	2	1	0.0
homolog plant,2,1,0.0	homolog plant	2	1	0.0
plant iojap,2,1,0.0	plant iojap	2	1	0.0
iojap protein,2,1,0.0	iojap protein	2	1	0.0
putative silver,2,1,0.0	putative silver	2	1	0.0
silver efflux,2,1,0.0	silver efflux	2	1	0.0
efflux pump,2,1,0.0	efflux pump	2	1	0.0
pump nicotinic,2,1,0.0	pump nicotinic	2	1	0.0
nicotinic acid,2,1,0.0	nicotinic acid	2	1	0.0
acid mononucleotide,2,1,0.0	acid mononucleotide	2	1	0.0
mononucleotide adenylyltransferase,2,1,0.0	mononucleotide adenylyltransferase	2	1	0.0
adenylyltransferase fog,2,1,0.0	adenylyltransferase fog	2	1	0.0
fog ankyrin,2,1,0.0	fog ankyrin	2	1	0.0
ankyrin repeat,2,1,0.0	ankyrin repeat	2	1	0.0
regulators copg/arc/metj,2,1,0.0	regulators copg/arc/metj	2	1	0.0
copg/arc/metj dna-binding,2,1,0.0	copg/arc/metj dna-binding	2	1	0.0
domain metal-binding,2,1,0.0	domain metal-binding	2	1	0.0
metal-binding domain,2,1,0.0	metal-binding domain	2	1	0.0
domain arsenate,2,1,0.0	domain arsenate	2	1	0.0
arsenate reductase,2,1,0.0	arsenate reductase	2	1	0.0
reductase related,2,1,0.0	reductase related	2	1	0.0
proteins glutaredoxin,2,1,0.0	proteins glutaredoxin	2	1	0.0
glutaredoxin family,2,1,0.0	glutaredoxin family	2	1	0.0
family uncharacterized,2,1,0.0	family uncharacterized	2	1	0.0
bacteria protein,2,1,0.0	bacteria protein	2	1	0.0
recombination trna,2,1,0.0	recombination trna	2	1	0.0
trna delta(2)-isopentenylpyrophosphate,2,1,0.0	trna delta(2)-isopentenylpyrophosphate	2	1	0.0
delta(2)-isopentenylpyrophosphate transferase,2,1,0.0	delta(2)-isopentenylpyrophosphate transferase	2	1	0.0
protein double-stranded,2,1,0.0	protein double-stranded	2	1	0.0
double-stranded beta-helix,2,1,0.0	double-stranded beta-helix	2	1	0.0
beta-helix domain,2,1,0.0	beta-helix domain	2	1	0.0
domain membrane-fusion,2,1,0.0	domain membrane-fusion	2	1	0.0
membrane-fusion protein,2,1,0.0	membrane-fusion protein	2	1	0.0
protein flagellar,2,1,0.0	protein flagellar	2	1	0.0
flagellar basal-body,2,1,0.0	flagellar basal-body	2	1	0.0
basal-body p-ring,2,1,0.0	basal-body p-ring	2	1	0.0
p-ring protein,2,1,0.0	p-ring protein	2	1	0.0
protein glycyl-trna,2,1,0.0	protein glycyl-trna	2	1	0.0
predicted endonuclease,2,1,0.0	predicted endonuclease	2	1	0.0
endonuclease uri,2,1,0.0	endonuclease uri	2	1	0.0
uri domain,2,1,0.0	uri domain	2	1	0.0
domain uncharacterized,2,1,0.0	domain uncharacterized	2	1	0.0
protein formamidopyrimidine-dna,2,1,0.0	protein formamidopyrimidine-dna	2	1	0.0
glycosylase deoxyribodipyrimidine,2,1,0.0	glycosylase deoxyribodipyrimidine	2	1	0.0
protein sam-dependent,2,1,0.0	protein sam-dependent	2	1	0.0
methyltransferases low-affinity,2,1,0.0	methyltransferases low-affinity	2	1	0.0
phosphodiesterase abc-type,2,1,0.0	phosphodiesterase abc-type	2	1	0.0
superfamily outer,2,1,0.0	superfamily outer	2	1	0.0
lipoprotein predicted,2,1,0.0	lipoprotein predicted	2	1	0.0
domain) response,2,1,0.0	domain) response	2	1	0.0
domain osmosensitive,2,1,0.0	domain osmosensitive	2	1	0.0
predicted nad/fad-dependent,2,1,0.0	predicted nad/fad-dependent	2	1	0.0
nad/fad-dependent oxidoreductase,2,1,0.0	nad/fad-dependent oxidoreductase	2	1	0.0
oxidoreductase phosphoglucomutase,2,1,0.0	oxidoreductase phosphoglucomutase	2	1	0.0
phosphoglucomutase integrase,2,1,0.0	phosphoglucomutase integrase	2	1	0.0
integrase dipeptide/tripeptide,2,1,0.0	integrase dipeptide/tripeptide	2	1	0.0
permease membrane,2,1,0.0	permease membrane	2	1	0.0
membrane protease,2,1,0.0	membrane protease	2	1	0.0
protease subunits,2,1,0.0	protease subunits	2	1	0.0
subunits stomatin/prohibitin,2,1,0.0	subunits stomatin/prohibitin	2	1	0.0
stomatin/prohibitin homologs,2,1,0.0	stomatin/prohibitin homologs	2	1	0.0
homologs predicted,2,1,0.0	homologs predicted	2	1	0.0
predicted glycosyltransferases,2,1,0.0	predicted glycosyltransferases	2	1	0.0
glycosyltransferases high-affinity,2,1,0.0	glycosyltransferases high-affinity	2	1	0.0
chain atp,2,1,0.0	chain atp	2	1	0.0
phosphoribosyltransferase k+-transporting,2,1,0.0	phosphoribosyltransferase k+-transporting	2	1	0.0
superfamily) arginine/lysine/ornithine,2,1,0.0	superfamily) arginine/lysine/ornithine	2	1	0.0
decarboxylases sphingosine,2,1,0.0	decarboxylases sphingosine	2	1	0.0
sphingosine kinase,2,1,0.0	sphingosine kinase	2	1	0.0
kinase enzymes,2,1,0.0	kinase enzymes	2	1	0.0
enzymes related,2,1,0.0	enzymes related	2	1	0.0
related eukaryotic,2,1,0.0	related eukaryotic	2	1	0.0
eukaryotic diacylglycerol,2,1,0.0	eukaryotic diacylglycerol	2	1	0.0
kinase signal,2,1,0.0	kinase signal	2	1	0.0
signal transduction,2,1,0.0	signal transduction	2	1	0.0
transduction histidine,2,1,0.0	transduction histidine	2	1	0.0
kinase superfamily,2,1,0.0	kinase superfamily	2	1	0.0
helicases anti-anti-sigma,2,1,0.0	helicases anti-anti-sigma	2	1	0.0
factor) histidinol-phosphate/aromatic,2,1,0.0	factor) histidinol-phosphate/aromatic	2	1	0.0
decarboxylase trna,2,1,0.0	decarboxylase trna	2	1	0.0
trna nucleotidyltransferase/poly(a),2,1,0.0	trna nucleotidyltransferase/poly(a)	2	1	0.0
nucleotidyltransferase/poly(a) polymerase,2,1,0.0	nucleotidyltransferase/poly(a) polymerase	2	1	0.0
polymerase abc-type,2,1,0.0	polymerase abc-type	2	1	0.0
phosphate export,2,1,0.0	phosphate export	2	1	0.0
export systems,2,1,0.0	export systems	2	1	0.0
component stress-induced,2,1,0.0	component stress-induced	2	1	0.0
unknown) 3-hydroxyisobutyrate,2,1,0.0	unknown) 3-hydroxyisobutyrate	2	1	0.0
3-hydroxyisobutyrate dehydrogenase,2,1,0.0	3-hydroxyisobutyrate dehydrogenase	2	1	0.0
related beta-hydroxyacid,2,1,0.0	related beta-hydroxyacid	2	1	0.0
beta-hydroxyacid dehydrogenases,2,1,0.0	beta-hydroxyacid dehydrogenases	2	1	0.0
dehydrogenases sh3,2,1,0.0	dehydrogenases sh3	2	1	0.0
uncharacterized membrane,2,1,0.0	uncharacterized membrane	2	1	0.0
putative virulence,2,1,0.0	putative virulence	2	1	0.0
virulence factor,2,1,0.0	virulence factor	2	1	0.0
factor outer,2,1,0.0	factor outer	2	1	0.0
glycosyltransferase histidinol,2,1,0.0	glycosyltransferase histidinol	2	1	0.0
hydrolase alpha/beta,2,1,0.0	hydrolase alpha/beta	2	1	0.0
superfamily amino,2,1,0.0	superfamily amino	2	1	0.0
transporters predicted,2,1,0.0	transporters predicted	2	1	0.0
protein 5,2,1,0.0	protein 5	2	1	0.0
5 10-methylenetetrahydrofolate,2,1,0.0	5 10-methylenetetrahydrofolate	2	1	0.0
10-methylenetetrahydrofolate reductase,2,1,0.0	10-methylenetetrahydrofolate reductase	2	1	0.0
reductase abc-type,2,1,0.0	reductase abc-type	2	1	0.0
component glycosyltransferases,2,1,0.0	component glycosyltransferases	2	1	0.0
biogenesis udp-galactopyranose,2,1,0.0	biogenesis udp-galactopyranose	2	1	0.0
udp-galactopyranose mutase,2,1,0.0	udp-galactopyranose mutase	2	1	0.0
mutase superoxide,2,1,0.0	mutase superoxide	2	1	0.0
dismutase uncharacterized,2,1,0.0	dismutase uncharacterized	2	1	0.0
protein lipoprotein,2,1,0.0	protein lipoprotein	2	1	0.0
peptidase abc-type,2,1,0.0	peptidase abc-type	2	1	0.0
bacteria organic,2,1,0.0	bacteria organic	2	1	0.0
organic solvent,2,1,0.0	organic solvent	2	1	0.0
solvent tolerance,2,1,0.0	solvent tolerance	2	1	0.0
protein osta,2,1,0.0	protein osta	2	1	0.0
osta uncharacterized,2,1,0.0	osta uncharacterized	2	1	0.0
bacteria udp-n-acetylglucosamine,2,1,0.0	bacteria udp-n-acetylglucosamine	2	1	0.0
glycosyltransferase n-acetylglucosamine-6-phosphate,2,1,0.0	glycosyltransferase n-acetylglucosamine-6-phosphate	2	1	0.0
n-acetylglucosamine-6-phosphate deacetylase,2,1,0.0	n-acetylglucosamine-6-phosphate deacetylase	2	1	0.0
deacetylase methyl-accepting,2,1,0.0	deacetylase methyl-accepting	2	1	0.0
methyl-accepting chemotaxis,2,1,0.0	methyl-accepting chemotaxis	2	1	0.0
chemotaxis protein,2,1,0.0	chemotaxis protein	2	1	0.0
uncharacterized flavoproteins,2,1,0.0	uncharacterized flavoproteins	2	1	0.0
flavoproteins uncharacterized,2,1,0.0	flavoproteins uncharacterized	2	1	0.0
ii) predicted,2,1,0.0	ii) predicted	2	1	0.0
methyltransferase recombinational,2,1,0.0	methyltransferase recombinational	2	1	0.0
hydrolase gtpase,2,1,0.0	hydrolase gtpase	2	1	0.0
gtpase abc-type,2,1,0.0	gtpase abc-type	2	1	0.0
abc-type bacteriocin/lantibiotic,2,1,0.0	abc-type bacteriocin/lantibiotic	2	1	0.0
bacteriocin/lantibiotic exporters,2,1,0.0	bacteriocin/lantibiotic exporters	2	1	0.0
exporters n-terminal,2,1,0.0	exporters n-terminal	2	1	0.0
n-terminal double-glycine,2,1,0.0	n-terminal double-glycine	2	1	0.0
double-glycine peptidase,2,1,0.0	double-glycine peptidase	2	1	0.0
peptidase domain,2,1,0.0	peptidase domain	2	1	0.0
protein thioredoxin-like,2,1,0.0	protein thioredoxin-like	2	1	0.0
thioredoxin-like proteins,2,1,0.0	thioredoxin-like proteins	2	1	0.0
proteins domains,2,1,0.0	proteins domains	2	1	0.0
domains endonuclease,2,1,0.0	domains endonuclease	2	1	0.0
iv superfamily,2,1,0.0	iv superfamily	2	1	0.0
helicases uncharacterized,2,1,0.0	helicases uncharacterized	2	1	0.0
protein signal,2,1,0.0	protein signal	2	1	0.0
gtpase tyrosyl-trna,2,1,0.0	gtpase tyrosyl-trna	2	1	0.0
tyrosyl-trna synthetase,2,1,0.0	tyrosyl-trna synthetase	2	1	0.0
synthetase translation,2,1,0.0	synthetase translation	2	1	0.0
ts ribosomal,2,1,0.0	ts ribosomal	2	1	0.0
s2 predicted,2,1,0.0	s2 predicted	2	1	0.0
domain fkbp-type,2,1,0.0	domain fkbp-type	2	1	0.0
[truncated: 5,440 more rows]

## Sheet: b.3
COG0327 - COGs only	Needs filtered for irrelevant keywords (10/15/2020)
comma separated export	Keyword	Words	Uses	Uses (%)
protein,1,227,4.6
predicted,1,135,2.7
uncharacterized,1,121,2.5
conserved,1,102,2.1
subunit,1,73,1.5
related,1,73,1.5
abc-type,1,73,1.5	abc-type	1	73	1.5
transport,1,71,1.4	transport	1	71	1.4
system,1,63,1.3
component,1,65,1.3
dna,1,44,0.9	dna	1	44	0.9
atpase,1,44,0.9	atpase	1	44	0.9
membrane,1,37,0.8	membrane	1	37	0.8
superfamily,1,39,0.8
proteins,1,33,0.7
permease,1,36,0.7	permease	1	36	0.7
bacteria,1,28,0.6
domain,1,30,0.6
synthetase,1,23,0.5	synthetase	1	23	0.5
transcriptional,1,24,0.5	transcriptional	1	24	0.5
kinase,1,24,0.5	kinase	1	24	0.5
hydrolase,1,25,0.5	hydrolase	1	25	0.5
synthase,1,25,0.5	synthase	1	25	0.5
involved,1,26,0.5
regulator,1,18,0.4	regulator	1	18	0.4
dehydrogenase,1,19,0.4	dehydrogenase	1	19	0.4
systems,1,19,0.4
acid,1,20,0.4	acid	1	20	0.4
enzymes,1,20,0.4
superfamily),1,13,0.3
resistance,1,13,0.3	resistance	1	13	0.3
organic,1,13,0.3	organic	1	13	0.3
family,1,14,0.3
regulators,1,15,0.3	regulators	1	15	0.3
components,1,15,0.3
polymerase,1,16,0.3	polymerase	1	16	0.3
ribosomal,1,16,0.3	ribosomal	1	16	0.3
periplasmic,1,16,0.3	periplasmic	1	16	0.3
phosphate,1,16,0.3	phosphate	1	16	0.3
reductase,1,16,0.3	reductase	1	16	0.3
tetrahydromethanopterin,1,16,0.3	tetrahydromethanopterin	1	16	0.3
s-methyltransferase,1,16,0.3	s-methyltransferase	1	16	0.3
rna,1,17,0.3	rna	1	17	0.3
ferredoxin,1,17,0.3	ferredoxin	1	17	0.3
hydrolases,1,17,0.3	hydrolases	1	17	0.3
gtpase,1,10,0.2	gtpase	1	10	0.2
ii,1,10,0.2
(contains,1,10,0.2
repeat,1,10,0.2
fe-s,1,10,0.2	fe-s	1	10	0.2
archaea,1,10,0.2
methyl,1,10,0.2	methyl	1	10	0.2
coenzyme,1,10,0.2	coenzyme	1	10	0.2
sam-dependent,1,11,0.2	sam-dependent	1	11	0.2
glycyl-trna,1,11,0.2	glycyl-trna	1	11	0.2
alpha,1,11,0.2
helicases,1,11,0.2	helicases	1	11	0.2
oxidoreductase,1,11,0.2	oxidoreductase	1	11	0.2
biosynthesis,1,11,0.2
repair,1,12,0.2	repair	1	12	0.2
factor,1,12,0.2	factor	1	12	0.2
solvents,1,12,0.2	solvents	1	12	0.2
fog,1,12,0.2	fog	1	12	0.2
enzyme,1,12,0.2
dna-directed,1,8,0.2	dna-directed	1	8	0.2
sigma,1,8,0.2
transferase,1,8,0.2	transferase	1	8	0.2
pyruvate,1,8,0.2	pyruvate	1	8	0.2
2-oxoacid,1,8,0.2	2-oxoacid	1	8	0.2
domain),1,8,0.2
ligase,1,8,0.2	ligase	1	8	0.2
transporters,1,8,0.2	transporters	1	8	0.2
chain,1,8,0.2
zn-ribbon,1,9,0.2	zn-ribbon	1	9	0.2
possibly,1,9,0.2
nucleic,1,9,0.2	nucleic	1	9	0.2
acid-binding,1,9,0.2	acid-binding	1	9	0.2
glycosylase,1,9,0.2	glycosylase	1	9	0.2
putative,1,9,0.2
endonuclease,1,9,0.2	endonuclease	1	9	0.2
multidrug,1,9,0.2	multidrug	1	9	0.2
beta,1,9,0.2
amino,1,9,0.2	amino	1	9	0.2
oxidoreductases,1,9,0.2	oxidoreductases	1	9	0.2
dehydrogenases,1,9,0.2	dehydrogenases	1	9	0.2
rna-binding,1,9,0.2	rna-binding	1	9	0.2
dipeptide/oligopeptide/nickel,1,9,0.2	dipeptide/oligopeptide/nickel	1	9	0.2
permeases,1,9,0.2	permeases	1	9	0.2
lactam,1,3,0.1	lactam	1	3	0.1
fructose-2,1,3,0.1	fructose-2	1	3	0.1
6-bisphosphatase,1,3,0.1	6-bisphosphatase	1	3	0.1
glycine/d-amino,1,3,0.1	glycine/d-amino	1	3	0.1
oxidases,1,3,0.1	oxidases	1	3	0.1
(deaminating),1,3,0.1	(deaminating)	1	3	0.1
formamidopyrimidine-dna,1,3,0.1	formamidopyrimidine-dna	1	3	0.1
3-deoxy-d-manno-octulosonic-acid,1,3,0.1	3-deoxy-d-manno-octulosonic-acid	1	3	0.1
di-,1,3,0.1
tripeptidases,1,3,0.1	tripeptidases	1	3	0.1
dtdp-glucose,1,3,0.1	dtdp-glucose	1	3	0.1
dtdp-4-dehydrorhamnose,1,3,0.1	dtdp-4-dehydrorhamnose	1	3	0.1
5-epimerase,1,3,0.1	5-epimerase	1	3	0.1
primosome,1,3,0.1	primosome	1	3	0.1
deoxyribodipyrimidine,1,3,0.1	deoxyribodipyrimidine	1	3	0.1
pyrrolidone-carboxylate,1,3,0.1	pyrrolidone-carboxylate	1	3	0.1
(n-terminal,1,3,0.1
pyroglutamyl,1,3,0.1	pyroglutamyl	1	3	0.1
peptidase),1,3,0.1	peptidase)	1	3	0.1
dtdp-d-glucose,1,3,0.1	dtdp-d-glucose	1	3	0.1
6-dehydratase,1,3,0.1	6-dehydratase	1	3	0.1
nitroreductase,1,3,0.1	nitroreductase	1	3	0.1
prolipoprotein,1,3,0.1	prolipoprotein	1	3	0.1
diacylglyceryltransferase,1,3,0.1	diacylglyceryltransferase	1	3	0.1
phosphoribosylcarboxyaminoimidazole,1,3,0.1	phosphoribosylcarboxyaminoimidazole	1	3	0.1
(ncair),1,3,0.1	(ncair)	1	3	0.1
(dynamin-related),1,3,0.1	(dynamin-related)	1	3	0.1
adenine/guanine,1,3,0.1	adenine/guanine	1	3	0.1
phosphoribosyltransferases,1,3,0.1	phosphoribosyltransferases	1	3	0.1
prpp-binding,1,3,0.1	prpp-binding	1	3	0.1
l19,1,3,0.1	l19	1	3	0.1
divalent,1,3,0.1	divalent	1	3	0.1
heavy-metal,1,3,0.1	heavy-metal	1	3	0.1
cations,1,3,0.1	cations	1	3	0.1
pyrophosphatase/exopolyphosphatase,1,3,0.1	pyrophosphatase/exopolyphosphatase	1	3	0.1
penicillin,1,3,0.1	penicillin	1	3	0.1
n-terminal,1,3,0.1
rimm,1,3,0.1	rimm	1	3	0.1
16s,1,3,0.1	16s	1	3	0.1
rrna,1,3,0.1	rrna	1	3	0.1
processing,1,3,0.1	processing	1	3	0.1
branched-chain,1,3,0.1	branched-chain	1	3	0.1
thiamine,1,3,0.1	thiamine	1	3	0.1
hydroxymethylpyrimidine/phosphomethylpyrimidine,1,3,0.1	hydroxymethylpyrimidine/phosphomethylpyrimidine	1	3	0.1
trna-(guanine-n1)-methyltransferase,1,3,0.1	trna-(guanine-n1)-methyltransferase	1	3	0.1
auxiliary,1,3,0.1
s16,1,3,0.1	s16	1	3	0.1
stas,1,3,0.1	stas	1	3	0.1
dgtp,1,3,0.1	dgtp	1	3	0.1
triphosphohydrolase,1,3,0.1	triphosphohydrolase	1	3	0.1
atp,1,3,0.1	atp	1	3	0.1
pyrophosphatase,1,3,0.1	pyrophosphatase	1	3	0.1
rhodanese-related,1,3,0.1	rhodanese-related	1	3	0.1
sulfurtransferase,1,3,0.1	sulfurtransferase	1	3	0.1
kh,1,3,0.1	kh	1	3	0.1
mn/zn,1,3,0.1	mn/zn	1	3	0.1
mono-,1,3,0.1
diheme,1,3,0.1	diheme	1	3	0.1
variants,1,3,0.1
pathway,1,3,0.1
stress-induced,1,3,0.1	stress-induced	1	3	0.1
morphogen,1,3,0.1	morphogen	1	3	0.1
(activity,1,3,0.1
unknown),1,3,0.1
mn2+/zn2+,1,3,0.1	mn2+/zn2+	1	3	0.1
delta,1,3,0.1
anthranilate/para-aminobenzoate,1,3,0.1	anthranilate/para-aminobenzoate	1	3	0.1
beta-lactamase,1,3,0.1	beta-lactamase	1	3	0.1
pyridoxal,1,3,0.1	pyridoxal	1	3	0.1
symporter,1,3,0.1	symporter	1	3	0.1
carboxylase,1,3,0.1	carboxylase	1	3	0.1
lysophospholipase,1,3,0.1	lysophospholipase	1	3	0.1
sulfoxide,1,3,0.1	sulfoxide	1	3	0.1
valyl-trna,1,3,0.1	valyl-trna	1	3	0.1
glutamine,1,3,0.1	glutamine	1	3	0.1
dipeptide,1,3,0.1	dipeptide	1	3	0.1
pathway),1,3,0.1
protein),1,3,0.1
molecular,1,3,0.1
heat,1,3,0.1	heat	1	3	0.1
shock,1,3,0.1	shock	1	3	0.1
complex,1,3,0.1
sh3,1,3,0.1	sh3	1	3	0.1
(had,1,3,0.1	(had	1	3	0.1
udp-glucose,1,3,0.1	udp-glucose	1	3	0.1
4-epimerase,1,3,0.1	4-epimerase	1	3	0.1
membrane-associated,1,3,0.1	membrane-associated	1	3	0.1
alpha/beta,1,3,0.1
glycosyltransferases,1,3,0.1	glycosyltransferases	1	3	0.1
aminopeptidase,1,3,0.1	aminopeptidase	1	3	0.1
histidine,1,3,0.1	histidine	1	3	0.1
transduction,1,3,0.1	transduction	1	3	0.1
integral,1,3,0.1
utilization,1,4,0.1
a/g-specific,1,4,0.1	a/g-specific	1	4	0.1
pyrophosphorylase,1,4,0.1	pyrophosphorylase	1	4	0.1
pseudouridylate,1,4,0.1	pseudouridylate	1	4	0.1
23s,1,4,0.1	23s	1	4	0.1
rna-specific,1,4,0.1	rna-specific	1	4	0.1
ii),1,4,0.1
photolyase,1,4,0.1	photolyase	1	4	0.1
recognition,1,4,0.1	recognition	1	4	0.1
particle,1,4,0.1
mutase,1,4,0.1	mutase	1	4	0.1
pyrophosphohydrolases,1,4,0.1	pyrophosphohydrolases	1	4	0.1
oxidative,1,4,0.1	oxidative	1	4	0.1
damage,1,4,0.1	damage	1	4	0.1
endoiii-related,1,4,0.1	endoiii-related	1	4	0.1
segregation,1,4,0.1	segregation	1	4	0.1
gtpases,1,4,0.1	gtpases	1	4	0.1
tolerance,1,4,0.1	tolerance	1	4	0.1
elongation,1,4,0.1	elongation	1	4	0.1
exonuclease,1,4,0.1	exonuclease	1	4	0.1
udp-n-acetylglucosamine,1,4,0.1	udp-n-acetylglucosamine	1	4	0.1
enolpyruvyl,1,4,0.1	enolpyruvyl	1	4	0.1
fe2+/zn2+,1,4,0.1	fe2+/zn2+	1	4	0.1
regulation,1,4,0.1	regulation	1	4	0.1
required,1,4,0.1
factor),1,4,0.1
binding,1,4,0.1
phosphatase,1,4,0.1	phosphatase	1	4	0.1
hth,1,4,0.1	hth	1	4	0.1
glutaredoxin,1,4,0.1	glutaredoxin	1	4	0.1
parvulin-like,1,4,0.1	parvulin-like	1	4	0.1
gamma,1,4,0.1
homolog,1,4,0.1
sugar,1,4,0.1	sugar	1	4	0.1
metal-binding,1,4,0.1	metal-binding	1	4	0.1
hd,1,4,0.1	hd	1	4	0.1
diadenosine,1,4,0.1	diadenosine	1	4	0.1
tetraphosphatase,1,4,0.1	tetraphosphatase	1	4	0.1
iii,1,4,0.1
k+,1,4,0.1	k+	1	4	0.1
channel,1,4,0.1	channel	1	4	0.1
chey-like,1,4,0.1	chey-like	1	4	0.1
receiver,1,4,0.1	receiver	1	4	0.1
k+-transporting,1,4,0.1	k+-transporting	1	4	0.1
phosphotransferase,1,4,0.1	phosphotransferase	1	4	0.1
assembly,1,4,0.1
homologs,1,5,0.1
ribonuclease,1,5,0.1	ribonuclease	1	5	0.1
histidinol-phosphate/aromatic,1,5,0.1	histidinol-phosphate/aromatic	1	5	0.1
cobyric,1,5,0.1	cobyric	1	5	0.1
homoserine,1,5,0.1	homoserine	1	5	0.1
trans-succinylase,1,5,0.1	trans-succinylase	1	5	0.1
collagenase,1,5,0.1	collagenase	1	5	0.1
proteases,1,5,0.1	proteases	1	5	0.1
chromosome,1,5,0.1	chromosome	1	5	0.1
multimeric,1,5,0.1
flavodoxin,1,5,0.1	flavodoxin	1	5	0.1
wrba,1,5,0.1	wrba	1	5	0.1
transporter,1,5,0.1	transporter	1	5	0.1
inorganic,1,5,0.1	inorganic	1	5	0.1
acetyltransferase,1,5,0.1	acetyltransferase	1	5	0.1
domains,1,5,0.1
histidinol,1,5,0.1	histidinol	1	5	0.1
pp-loop,1,5,0.1	pp-loop	1	5	0.1
specificities,1,5,0.1
(related,1,5,0.1
short-chain,1,5,0.1	short-chain	1	5	0.1
alcohol,1,5,0.1	alcohol	1	5	0.1
dehydrogenases),1,5,0.1	dehydrogenases)	1	5	0.1
methyltransferases,1,5,0.1	methyltransferases	1	5	0.1
response,1,5,0.1	response	1	5	0.1
cluster,1,5,0.1	cluster	1	5	0.1
phosphatases,1,5,0.1	phosphatases	1	5	0.1
(alpha/beta,1,5,0.1
peptide,1,5,0.1	peptide	1	5	0.1
chaperone,1,5,0.1	chaperone	1	5	0.1
eukaryotic,1,5,0.1
methylase,1,5,0.1	methylase	1	5	0.1
serine/threonine,1,5,0.1	serine/threonine	1	5	0.1
methyltransferase,1,6,0.1	methyltransferase	1	6	0.1
allophanate,1,6,0.1	allophanate	1	6	0.1
primase,1,6,0.1	primase	1	6	0.1
(bacterial,1,6,0.1
type),1,6,0.1
glycerol-3-phosphate,1,6,0.1	glycerol-3-phosphate	1	6	0.1
peptidase,1,6,0.1	peptidase	1	6	0.1
iv,1,6,0.1
including,1,6,0.1
lipoprotein,1,6,0.1	lipoprotein	1	6	0.1
translation,1,6,0.1	translation	1	6	0.1
peptidyl-prolyl,1,6,0.1	peptidyl-prolyl	1	6	0.1
outer,1,6,0.1
atp-dependent,1,6,0.1	atp-dependent	1	6	0.1
protease,1,6,0.1	protease	1	6	0.1
tpr,1,6,0.1	tpr	1	6	0.1
methionine,1,6,0.1	methionine	1	6	0.1
major,1,6,0.1
facilitator,1,6,0.1
acyltransferases,1,6,0.1	acyltransferases	1	6	0.1
dna-binding,1,6,0.1	dna-binding	1	6	0.1
(sigma70/sigma32),1,7,0.1	(sigma70/sigma32)	1	7	0.1
synthases,1,7,0.1	synthases	1	7	0.1
aminotransferase,1,7,0.1	aminotransferase	1	7	0.1
decarboxylase,1,7,0.1	decarboxylase	1	7	0.1
signal,1,7,0.1	signal	1	7	0.1
ntp,1,7,0.1	ntp	1	7	0.1
atpases,1,7,0.1	atpases	1	7	0.1
uptake,1,7,0.1	uptake	1	7	0.1
lyase,1,7,0.1	lyase	1	7	0.1
isomerase,1,7,0.1	isomerase	1	7	0.1
phosphoribosyltransferase,1,7,0.1	phosphoribosyltransferase	1	7	0.1
cytochrome,1,7,0.1	cytochrome	1	7	0.1
type,1,7,0.1
zn-dependent,1,7,0.1	zn-dependent	1	7	0.1
cell,1,7,0.1
component/surface,1,1,0.0	component/surface	1	1	0.0
dihydroneopterin,1,1,0.0	dihydroneopterin	1	1	0.0
aldolase,1,1,0.0	aldolase	1	1	0.0
partitioning,1,1,0.0	partitioning	1	1	0.0
output,1,1,0.0
pentose-5-phosphate-3-epimerase,1,1,0.0	pentose-5-phosphate-3-epimerase	1	1	0.0
cysteine,1,1,0.0	cysteine	1	1	0.0
sulfinate,1,1,0.0	sulfinate	1	1	0.0
desulfinase/cysteine,1,1,0.0	desulfinase/cysteine	1	1	0.0
desulfurase,1,1,0.0	desulfurase	1	1	0.0
na+/proline,1,1,0.0	na+/proline	1	1	0.0
a/acetone,1,1,0.0	a/acetone	1	1	0.0
(cobalamin-independent),1,1,0.0	(cobalamin-independent)	1	1	0.0
threonine,1,1,0.0	threonine	1	1	0.0
regulator/sugar,1,1,0.0	regulator/sugar	1	1	0.0
wd40,1,1,0.0	wd40	1	1	0.0
nifu,1,1,0.0	nifu	1	1	0.0
formation,1,1,0.0	formation	1	1	0.0
signal-transduction,1,1,0.0	signal-transduction	1	1	0.0
camp-binding,1,1,0.0	camp-binding	1	1	0.0
b/acetone,1,1,0.0	b/acetone	1	1	0.0
serine,1,1,0.0	serine	1	1	0.0
inhibitor,1,1,0.0	inhibitor	1	1	0.0
alpha-galactosidases/6-phospho-beta-glucosidases,1,1,0.0	alpha-galactosidases/6-phospho-beta-glucosidases	1	1	0.0
exoribonuclease,1,1,0.0	exoribonuclease	1	1	0.0
n-acetylglucosamine,1,1,0.0	n-acetylglucosamine	1	1	0.0
selenocysteine,1,1,0.0	selenocysteine	1	1	0.0
thiol-disulfide,1,1,0.0	thiol-disulfide	1	1	0.0
thioredoxins,1,1,0.0	thioredoxins	1	1	0.0
6-phosphofructokinase,1,1,0.0	6-phosphofructokinase	1	1	0.0
aspartyl-trna,1,1,0.0	aspartyl-trna	1	1	0.0
spermidine/putrescine,1,1,0.0	spermidine/putrescine	1	1	0.0
cycle,1,1,0.0	cycle	1	1	0.0
control,1,1,0.0	control	1	1	0.0
phenylalanyl-trna,1,1,0.0	phenylalanyl-trna	1	1	0.0
phosphoribosylaminoimidazolesuccinocarboxamide,1,1,0.0	phosphoribosylaminoimidazolesuccinocarboxamide	1	1	0.0
(saicar),1,1,0.0	(saicar)	1	1	0.0
excinuclease,1,1,0.0	excinuclease	1	1	0.0
s1,1,1,0.0	s1	1	1	0.0
lmbe,1,1,0.0	lmbe	1	1	0.0
von,1,1,0.0
willebrand,1,1,0.0	willebrand	1	1	0.0
(vwa),1,1,0.0	(vwa)	1	1	0.0
aspartate/tyrosine/aromatic,1,1,0.0	aspartate/tyrosine/aromatic	1	1	0.0
oligoendopeptidase,1,1,0.0	oligoendopeptidase	1	1	0.0
cyclotransferase,1,1,0.0	cyclotransferase	1	1	0.0
udp-n-acetylmuramyl,1,1,0.0	udp-n-acetylmuramyl	1	1	0.0
tripeptide,1,1,0.0	tripeptide	1	1	0.0
ketosteroid,1,1,0.0	ketosteroid	1	1	0.0
isomerase-related,1,1,0.0	isomerase-related	1	1	0.0
thih,1,1,0.0	thih	1	1	0.0
6-phosphogluconate,1,1,0.0	6-phosphogluconate	1	1	0.0
serine-pyruvate,1,1,0.0	serine-pyruvate	1	1	0.0
aminotransferase/archaeal,1,1,0.0	aminotransferase/archaeal	1	1	0.0
aspartate,1,1,0.0	aspartate	1	1	0.0
solute-binding,1,1,0.0	solute-binding	1	1	0.0
glucoamylase,1,1,0.0	glucoamylase	1	1	0.0
glucose-6-p,1,1,0.0	glucose-6-p	1	1	0.0
6-phosphogluconolactonase/glucosamine-6-phosphate,1,1,0.0	6-phosphogluconolactonase/glucosamine-6-phosphate	1	1	0.0
isomerase/deaminase,1,1,0.0	isomerase/deaminase	1	1	0.0
glucose-6-phosphate,1,1,0.0	glucose-6-phosphate	1	1	0.0
1-dehydrogenase,1,1,0.0	1-dehydrogenase	1	1	0.0
oligopeptide,1,1,0.0	oligopeptide	1	1	0.0
glycine,1,1,0.0	glycine	1	1	0.0
betaine/choline-binding,1,1,0.0	betaine/choline-binding	1	1	0.0
(lipo)protein,1,1,0.0	(lipo)protein	1	1	0.0
(osmoprotectant,1,1,0.0	(osmoprotectant	1	1	0.0
dnaj-class,1,1,0.0	dnaj-class	1	1	0.0
c-terminal,1,1,0.0
zn,1,1,0.0	zn	1	1	0.0
finger,1,1,0.0	finger	1	1	0.0
aspartokinases,1,1,0.0	aspartokinases	1	1	0.0
starvation-inducible,1,1,0.0	starvation-inducible	1	1	0.0
phoh,1,1,0.0	phoh	1	1	0.0
gene,1,1,0.0
(muts,1,1,0.0	(muts	1	1	0.0
family),1,1,0.0
nucleoside-diphosphate-sugar,1,1,0.0	nucleoside-diphosphate-sugar	1	1	0.0
epimerases,1,1,0.0	epimerases	1	1	0.0
nucleotide-utilizing,1,1,0.0	nucleotide-utilizing	1	1	0.0
molybdopterin-biosynthesis,1,1,0.0	molybdopterin-biosynthesis	1	1	0.0
moea,1,1,0.0	moea	1	1	0.0
pyruvate/2-oxoglutarate,1,1,0.0	pyruvate/2-oxoglutarate	1	1	0.0
dihydrolipoamide,1,1,0.0	dihydrolipoamide	1	1	0.0
(e3),1,1,0.0	(e3)	1	1	0.0
(metallo-beta-lactamase,1,1,0.0	(metallo-beta-lactamase	1	1	0.0
adp-ribose,1,1,0.0	adp-ribose	1	1	0.0
lyase-activating,1,1,0.0	lyase-activating	1	1	0.0
acetyl-coa,1,1,0.0	acetyl-coa	1	1	0.0
grpe,1,1,0.0	grpe	1	1	0.0
(heat,1,1,0.0	(heat	1	1	0.0
deoxycytidylate,1,1,0.0	deoxycytidylate	1	1	0.0
sortase,1,1,0.0	sortase	1	1	0.0
responsive,1,1,0.0	responsive	1	1	0.0
(mrna-binding),1,1,0.0	(mrna-binding)	1	1	0.0
(competence-,1,1,0.0	(competence-	1	1	0.0
mitomycin-induced),1,1,0.0	mitomycin-induced)	1	1	0.0
adenylate,1,1,0.0	adenylate	1	1	0.0
kinases,1,1,0.0	kinases	1	1	0.0
phosphatidylglycerophosphate,1,1,0.0	phosphatidylglycerophosphate	1	1	0.0
l11,1,1,0.0	l11	1	1	0.0
metallo-beta-lactamase,1,1,0.0	metallo-beta-lactamase	1	1	0.0
udp-n-acetylmuramate,1,1,0.0	udp-n-acetylmuramate	1	1	0.0
s20,1,1,0.0	s20	1	1	0.0
deoxyxylulose,1,1,0.0	deoxyxylulose	1	1	0.0
isoprenoid,1,1,0.0	isoprenoid	1	1	0.0
s21,1,1,0.0	s21	1	1	0.0
abc,1,1,0.0	abc	1	1	0.0
duplicated,1,1,0.0
glycopeptide,1,1,0.0	glycopeptide	1	1	0.0
antibiotics,1,1,0.0	antibiotics	1	1	0.0
ftsi/penicillin-binding,1,1,0.0	ftsi/penicillin-binding	1	1	0.0
(azaleucine,1,1,0.0	(azaleucine	1	1	0.0
resistance),1,1,0.0	resistance)	1	1	0.0
dihydrodipicolinate,1,1,0.0	dihydrodipicolinate	1	1	0.0
synthase/n-acetylneuraminate,1,1,0.0	synthase/n-acetylneuraminate	1	1	0.0
3-hydroxy-3-methylglutaryl,1,1,0.0	3-hydroxy-3-methylglutaryl	1	1	0.0
coa,1,1,0.0	coa	1	1	0.0
mn2+,1,1,0.0	mn2+	1	1	0.0
fe2+,1,1,0.0	fe2+	1	1	0.0
nramp,1,1,0.0	nramp	1	1	0.0
reca/rada,1,1,0.0	reca/rada	1	1	0.0
recombinase,1,1,0.0	recombinase	1	1	0.0
coproporphyrinogen,1,1,0.0	coproporphyrinogen	1	1	0.0
oxidase,1,1,0.0	oxidase	1	1	0.0
aspartate-semialdehyde,1,1,0.0	aspartate-semialdehyde	1	1	0.0
cytidine,1,1,0.0	cytidine	1	1	0.0
(predicted,1,1,0.0
atpase),1,1,0.0	atpase)	1	1	0.0
aldo/keto,1,1,0.0	aldo/keto	1	1	0.0
reductases,1,1,0.0	reductases	1	1	0.0
diketogulonate,1,1,0.0	diketogulonate	1	1	0.0
induction,1,1,0.0	induction	1	1	0.0
arylsulfatase,1,1,0.0	arylsulfatase	1	1	0.0
(fe-s,1,1,0.0	(fe-s	1	1	0.0
oxidoreductase),1,1,0.0	oxidoreductase)	1	1	0.0
enterochelin,1,1,0.0	enterochelin	1	1	0.0
esterase,1,1,0.0	esterase	1	1	0.0
morphogenesis,1,1,0.0	morphogenesis	1	1	0.0
signaling,1,1,0.0	signaling	1	1	0.0
preprotein,1,1,0.0	preprotein	1	1	0.0
translocase,1,1,0.0	translocase	1	1	0.0
secg,1,1,0.0	secg	1	1	0.0
cobyrinic,1,1,0.0	cobyrinic	1	1	0.0
c-diamide,1,1,0.0	c-diamide	1	1	0.0
propanediol,1,1,0.0	propanediol	1	1	0.0
(includes,1,1,0.0
coumermycin,1,1,0.0	coumermycin	1	1	0.0
biosynthetic,1,1,0.0
specialized,1,1,0.0
leucyl,1,1,0.0	leucyl	1	1	0.0
(aminopeptidase,1,1,0.0	(aminopeptidase	1	1	0.0
t),1,1,0.0
fha,1,1,0.0	fha	1	1	0.0
phosphomannomutase,1,1,0.0	phosphomannomutase	1	1	0.0
acetylglutamate,1,1,0.0	acetylglutamate	1	1	0.0
dutpase,1,1,0.0	dutpase	1	1	0.0
lactate,1,1,0.0	lactate	1	1	0.0
2-keto-4-pentenoate,1,1,0.0	2-keto-4-pentenoate	1	1	0.0
hydratase/2-oxohepta-3-ene-1,1,1,0.0	hydratase/2-oxohepta-3-ene-1	1	1	0.0
7-dioic,1,1,0.0	7-dioic	1	1	0.0
hydratase,1,1,0.0	hydratase	1	1	0.0
(catechol,1,1,0.0	(catechol	1	1	0.0
transposase,1,1,0.0	transposase	1	1	0.0
inactivated,1,1,0.0	inactivated	1	1	0.0
derivatives,1,1,0.0	derivatives	1	1	0.0
is5,1,1,0.0	is5	1	1	0.0
ribosome-associated,1,1,0.0	ribosome-associated	1	1	0.0
recycling,1,1,0.0	recycling	1	1	0.0
50s,1,1,0.0	50s	1	1	0.0
(s4,1,1,0.0	(s4	1	1	0.0
paralog),1,1,0.0
nicotinate-nucleotide,1,1,0.0	nicotinate-nucleotide	1	1	0.0
shape-determining,1,1,0.0	shape-determining	1	1	0.0
phosphoenolpyruvate,1,1,0.0	phosphoenolpyruvate	1	1	0.0
membrane-bound,1,1,0.0	membrane-bound	1	1	0.0
lytic,1,1,0.0	lytic	1	1	0.0
murein,1,1,0.0	murein	1	1	0.0
transglycosylase,1,1,0.0	transglycosylase	1	1	0.0
pseudouridine,1,1,0.0	pseudouridine	1	1	0.0
carbon,1,1,0.0	carbon	1	1	0.0
storage,1,1,0.0	storage	1	1	0.0
(could,1,1,0.0
regulate,1,1,0.0	regulate	1	1	0.0
swarming,1,1,0.0	swarming	1	1	0.0
quorum,1,1,0.0	quorum	1	1	0.0
sensing),1,1,0.0	sensing)	1	1	0.0
4-diphosphocytidyl-2c-methyl-d-erythritol,1,1,0.0	4-diphosphocytidyl-2c-methyl-d-erythritol	1	1	0.0
2-phosphate,1,1,0.0	2-phosphate	1	1	0.0
tmrna-binding,1,1,0.0	tmrna-binding	1	1	0.0
3-deoxy-d-arabino-heptulosonate,1,1,0.0	3-deoxy-d-arabino-heptulosonate	1	1	0.0
7-phosphate,1,1,0.0	7-phosphate	1	1	0.0
(dahp),1,1,0.0	(dahp)	1	1	0.0
plant,1,1,0.0
iojap,1,1,0.0	iojap	1	1	0.0
silver,1,1,0.0	silver	1	1	0.0
efflux,1,1,0.0	efflux	1	1	0.0
pump,1,1,0.0	pump	1	1	0.0
nicotinic,1,1,0.0	nicotinic	1	1	0.0
mononucleotide,1,1,0.0	mononucleotide	1	1	0.0
adenylyltransferase,1,1,0.0	adenylyltransferase	1	1	0.0
ankyrin,1,1,0.0	ankyrin	1	1	0.0
copg/arc/metj,1,1,0.0	copg/arc/metj	1	1	0.0
arsenate,1,1,0.0	arsenate	1	1	0.0
delta(2)-isopentenylpyrophosphate,1,1,0.0	delta(2)-isopentenylpyrophosphate	1	1	0.0
double-stranded,1,1,0.0	double-stranded	1	1	0.0
beta-helix,1,1,0.0	beta-helix	1	1	0.0
membrane-fusion,1,1,0.0	membrane-fusion	1	1	0.0
flagellar,1,1,0.0	flagellar	1	1	0.0
basal-body,1,1,0.0	basal-body	1	1	0.0
p-ring,1,1,0.0	p-ring	1	1	0.0
uri,1,1,0.0	uri	1	1	0.0
nad/fad-dependent,1,1,0.0	nad/fad-dependent	1	1	0.0
phosphoglucomutase,1,1,0.0	phosphoglucomutase	1	1	0.0
stomatin/prohibitin,1,1,0.0	stomatin/prohibitin	1	1	0.0
sphingosine,1,1,0.0	sphingosine	1	1	0.0
nucleotidyltransferase/poly(a),1,1,0.0	nucleotidyltransferase/poly(a)	1	1	0.0
export,1,1,0.0	export	1	1	0.0
3-hydroxyisobutyrate,1,1,0.0	3-hydroxyisobutyrate	1	1	0.0
beta-hydroxyacid,1,1,0.0	beta-hydroxyacid	1	1	0.0
virulence,1,1,0.0	virulence	1	1	0.0
10-methylenetetrahydrofolate,1,1,0.0	10-methylenetetrahydrofolate	1	1	0.0
udp-galactopyranose,1,1,0.0	udp-galactopyranose	1	1	0.0
solvent,1,1,0.0	solvent	1	1	0.0
osta,1,1,0.0	osta	1	1	0.0
n-acetylglucosamine-6-phosphate,1,1,0.0	n-acetylglucosamine-6-phosphate	1	1	0.0
deacetylase,1,1,0.0	deacetylase	1	1	0.0
methyl-accepting,1,1,0.0	methyl-accepting	1	1	0.0
chemotaxis,1,1,0.0	chemotaxis	1	1	0.0
flavoproteins,1,1,0.0	flavoproteins	1	1	0.0
bacteriocin/lantibiotic,1,1,0.0	bacteriocin/lantibiotic	1	1	0.0
exporters,1,1,0.0	exporters	1	1	0.0
double-glycine,1,1,0.0	double-glycine	1	1	0.0
thioredoxin-like,1,1,0.0	thioredoxin-like	1	1	0.0
tyrosyl-trna,1,1,0.0	tyrosyl-trna	1	1	0.0
helicase,1,1,0.0	helicase	1	1	0.0
intracellular,1,1,0.0	intracellular	1	1	0.0
protease/amidase,1,1,0.0	protease/amidase	1	1	0.0
hd-gyp,1,1,0.0	hd-gyp	1	1	0.0
lysm,1,1,0.0	lysm	1	1	0.0
(class,1,2,0.0	(class	1	2	0.0
s2,1,2,0.0	s2	1	2	0.0
ts,1,2,0.0
-3,1,2,0.0
(including,1,2,0.0
poli),1,2,0.0	poli)	1	2	0.0
(isoleucine,1,2,0.0	(isoleucine	1	2	0.0
patch,1,2,0.0	patch	1	2	0.0
thymidylate,1,2,0.0	thymidylate	1	2	0.0
-,1,2,0.0
-5,1,2,0.0
aminotransferase/4-amino-4-deoxychorismate,1,2,0.0	aminotransferase/4-amino-4-deoxychorismate	1	2	0.0
fkbp-type,1,2,0.0	fkbp-type	1	2	0.0
cis-trans,1,2,0.0
(trigger,1,2,0.0	(trigger	1	2	0.0
monophosphate,1,2,0.0	monophosphate	1	2	0.0
fe-s-cluster,1,2,0.0	fe-s-cluster	1	2	0.0
6-pyruvoyl-tetrahydropterin,1,2,0.0	6-pyruvoyl-tetrahydropterin	1	2	0.0
molybdopterin-guanine,1,2,0.0	molybdopterin-guanine	1	2	0.0
dinucleotide,1,2,0.0	dinucleotide	1	2	0.0
php,1,2,0.0	php	1	2	0.0
8-dihydro-6-hydroxymethylpterin-pyrophosphokinase,1,2,0.0	8-dihydro-6-hydroxymethylpterin-pyrophosphokinase	1	2	0.0
antitoxin,1,2,0.0	antitoxin	1	2	0.0
toxin-antitoxin,1,2,0.0	toxin-antitoxin	1	2	0.0
stability,1,2,0.0	stability	1	2	0.0
secretory,1,2,0.0	secretory	1	2	0.0
pullulanase,1,2,0.0	pullulanase	1	2	0.0
pula,1,2,0.0	pula	1	2	0.0
glycosidases,1,2,0.0	glycosidases	1	2	0.0
(sua5),1,2,0.0	(sua5)	1	2	0.0
cystathionine,1,2,0.0	cystathionine	1	2	0.0
beta-lyases/cystathionine,1,2,0.0	beta-lyases/cystathionine	1	2	0.0
gamma-synthases,1,2,0.0	gamma-synthases	1	2	0.0
d-mannonate,1,2,0.0	d-mannonate	1	2	0.0
dehydratase,1,2,0.0	dehydratase	1	2	0.0
(unclassified),1,2,0.0
lon,1,2,0.0	lon	1	2	0.0
bacterial,1,2,0.0
orotate,1,2,0.0	orotate	1	2	0.0
fold,1,2,0.0
antiterminator,1,2,0.0	antiterminator	1	2	0.0
phosphopantothenoylcysteine,1,2,0.0	phosphopantothenoylcysteine	1	2	0.0
synthetase/decarboxylase,1,2,0.0	synthetase/decarboxylase	1	2	0.0
n-methylhydantoinase,1,2,0.0	n-methylhydantoinase	1	2	0.0
lactoylglutathione,1,2,0.0	lactoylglutathione	1	2	0.0
lyases,1,2,0.0	lyases	1	2	0.0
cbs,1,2,0.0	cbs	1	2	0.0
glycosyl,1,2,0.0	glycosyl	1	2	0.0
metalloendopeptidases,1,2,0.0	metalloendopeptidases	1	2	0.0
implicated,1,2,0.0
peptidases,1,2,0.0	peptidases	1	2	0.0
threonyl-trna,1,2,0.0	threonyl-trna	1	2	0.0
activity,1,2,0.0
atp-binding,1,2,0.0	atp-binding	1	2	0.0
uridine,1,2,0.0	uridine	1	2	0.0
homologous,1,2,0.0
snrnp,1,2,0.0	snrnp	1	2	0.0
proline/glycine,1,2,0.0	proline/glycine	1	2	0.0
betaine,1,2,0.0	betaine	1	2	0.0
l1,1,2,0.0	l1	1	2	0.0
esterases,1,2,0.0	esterases	1	2	0.0
unusual,1,2,0.0
recombinational,1,2,0.0	recombinational	1	2	0.0
(recf,1,2,0.0	(recf	1	2	0.0
ap,1,2,0.0	ap	1	2	0.0
nad-dependent,1,2,0.0	nad-dependent	1	2	0.0
brct,1,2,0.0	brct	1	2	0.0
lepa,1,2,0.0	lepa	1	2	0.0
protein/domain,1,2,0.0
typically,1,2,0.0
flavoprotein,1,2,0.0	flavoprotein	1	2	0.0
oxygenases,1,2,0.0	oxygenases	1	2	0.0
dim6/ntab,1,2,0.0	dim6/ntab	1	2	0.0
alkylation,1,2,0.0	alkylation	1	2	0.0
metal-dependent,1,2,0.0	metal-dependent	1	2	0.0
pyruvate-formate,1,2,0.0	pyruvate-formate	1	2	0.0
mismatch,1,2,0.0	mismatch	1	2	0.0
histone,1,2,0.0	histone	1	2	0.0
hpa2,1,2,0.0	hpa2	1	2	0.0
acetyltransferases,1,2,0.0	acetyltransferases	1	2	0.0
2-succinyl-6-hydroxy-2,1,2,0.0	2-succinyl-6-hydroxy-2	1	2	0.0
4-cyclohexadiene-1-carboxylate,1,2,0.0	4-cyclohexadiene-1-carboxylate	1	2	0.0
dna/rna,1,2,0.0	dna/rna	1	2	0.0
snf2,1,2,0.0	snf2	1	2	0.0
isochorismate,1,2,0.0	isochorismate	1	2	0.0
hd-superfamily,1,2,0.0	hd-superfamily	1	2	0.0
l-alanine-dl-glutamate,1,2,0.0	l-alanine-dl-glutamate	1	2	0.0
epimerase,1,2,0.0	epimerase	1	2	0.0
enolase,1,2,0.0	enolase	1	2	0.0
deaminase,1,2,0.0	deaminase	1	2	0.0
imidazolonepropionase,1,2,0.0	imidazolonepropionase	1	2	0.0
amidohydrolases,1,2,0.0	amidohydrolases	1	2	0.0
superoxide,1,2,0.0	superoxide	1	2	0.0
dismutase,1,2,0.0	dismutase	1	2	0.0
atp-utilizing,1,2,0.0	atp-utilizing	1	2	0.0
peroxiredoxin,1,2,0.0	peroxiredoxin	1	2	0.0
diacylglycerol,1,2,0.0	diacylglycerol	1	2	0.0
3-methyladenine,1,2,0.0	3-methyladenine	1	2	0.0
na+/melibiose,1,2,0.0	na+/melibiose	1	2	0.0
division,1,2,0.0	division	1	2	0.0
n6-adenine-specific,1,2,0.0	n6-adenine-specific	1	2	0.0
(family,1,2,0.0
x),1,2,0.0
wall,1,2,0.0	wall	1	2	0.0
biogenesis,1,2,0.0	biogenesis	1	2	0.0
bola,1,2,0.0	bola	1	2	0.0
anti-anti-sigma,1,2,0.0	anti-anti-sigma	1	2	0.0
regulatory,1,2,0.0	regulatory	1	2	0.0
(antagonist,1,2,0.0	(antagonist	1	2	0.0
anti-sigma,1,2,0.0	anti-sigma	1	2	0.0
o-acetylhomoserine,1,2,0.0	o-acetylhomoserine	1	2	0.0
sulfhydrylase,1,2,0.0	sulfhydrylase	1	2	0.0
glyoxylases,1,2,0.0	glyoxylases	1	2	0.0
acyl,1,2,0.0	acyl	1	2	0.0
carrier,1,2,0.0	carrier	1	2	0.0
glutathione,1,2,0.0	glutathione	1	2	0.0
s-transferase,1,2,0.0	s-transferase	1	2	0.0
2c-methyl-d-erythritol,1,2,0.0	2c-methyl-d-erythritol	1	2	0.0
4-cyclodiphosphate,1,2,0.0	4-cyclodiphosphate	1	2	0.0
bc,1,2,0.0	bc	1	2	0.0
rieske,1,2,0.0	rieske	1	2	0.0
c1,1,2,0.0	c1	1	2	0.0
high-affinity,1,2,0.0
osmosensitive,1,2,0.0	osmosensitive	1	2	0.0
integrase,1,2,0.0	integrase	1	2	0.0
antimicrobial,1,2,0.0	antimicrobial	1	2	0.0
l13,1,2,0.0	l13	1	2	0.0
s9,1,2,0.0	s9	1	2	0.0
arginine/lysine/ornithine,1,2,0.0	arginine/lysine/ornithine	1	2	0.0
decarboxylases,1,2,0.0	decarboxylases	1	2	0.0
dipeptide/tripeptide,1,2,0.0	dipeptide/tripeptide	1	2	0.0
glutamyl-,1,2,0.0	glutamyl-	1	2	0.0
glutaminyl-trna,1,2,0.0	glutaminyl-trna	1	2	0.0
synthetases,1,2,0.0	synthetases	1	2	0.0
mannose/fructose-specific,1,2,0.0	mannose/fructose-specific	1	2	0.0
iia,1,2,0.0
hpr-related,1,2,0.0	hpr-related	1	2	0.0
meiotic,1,2,0.0	meiotic	1	2	0.0
recombination,1,2,0.0	recombination	1	2	0.0
phosphoenolpyruvate-protein,1,2,0.0	phosphoenolpyruvate-protein	1	2	0.0
(pts,1,2,0.0
ei,1,2,0.0
bacteria),1,2,0.0
flavin-nucleotide-binding,1,2,0.0	flavin-nucleotide-binding	1	2	0.0
hypoxanthine-guanine,1,2,0.0	hypoxanthine-guanine	1	2	0.0
4-diphosphocytidyl-2-methyl-d-erithritol,1,2,0.0	4-diphosphocytidyl-2-methyl-d-erithritol	1	2	0.0
cysteinyl-trna,1,2,0.0	cysteinyl-trna	1	2	0.0
stringent,1,2,0.0	stringent	1	2	0.0
starvation,1,2,0.0	starvation	1	2	0.0
consisting,1,2,0.0
winged-helix,1,2,0.0	winged-helix	1	2	0.0
low-affinity,1,2,0.0
camp,1,2,0.0	camp	1	2	0.0
phosphodiesterase,1,2,0.0	phosphodiesterase	1	2	0.0
trna,1,2,0.0	trna	1	2	0.0
subunits,1,2,0.0
polysaccharide/polyol,1,2,0.0	polysaccharide/polyol	1	2	0.0
glycosyltransferase,1,2,0.0	glycosyltransferase	1	2	0.0
polypeptide,1,2,0.0	polypeptide	1	2	0.0
release,1,2,0.0
factors,1,2,0.0
pua,1,2,0.0	pua	1	2	0.0
biotin,1,2,0.0	biotin	1	2	0.0
dinucleotide-utilizing,1,2,0.0	dinucleotide-utilizing	1	2	0.0
thif/hesa,1,2,0.0	thif/hesa	1	2	0.0
alanyl-trna,1,2,0.0	alanyl-trna	1	2	0.0
(aaa+,1,2,0.0	(aaa+	1	2	0.0
h2-forming,1,2,0.0	h2-forming	1	2	0.0
n5,1,2,0.0
n10-methylenetetrahydromethanopterin,1,2,0.0	n10-methylenetetrahydromethanopterin	1	2	0.0
arginase/agmatinase/formimionoglutamate,1,2,0.0	arginase/agmatinase/formimionoglutamate	1	2	0.0
arginase,1,2,0.0	arginase	1	2	0.0
deoxyhypusine,1,2,0.0	deoxyhypusine	1	2	0.0
(ef-p)/translation,1,2,0.0	(ef-p)/translation	1	2	0.0
initiation,1,2,0.0	initiation	1	2	0.0
5a,1,2,0.0	5a	1	2	0.0
(eif-5a),1,2,0.0	(eif-5a)	1	2	0.0
phospholipid,1,2,0.0	phospholipid	1	2	0.0
tram,1,2,0.0	tram	1	2	0.0
glutamate,1,2,0.0	glutamate	1	2	0.0
plp-dependent,1,2,0.0	plp-dependent	1	2	0.0
amidotransferase,1,2,0.0	amidotransferase	1	2	0.0
pyridoxine,1,2,0.0	pyridoxine	1	2	0.0
universal,1,2,0.0
stress,1,2,0.0	stress	1	2	0.0
uspa,1,2,0.0	uspa	1	2	0.0
nucleotide-binding,1,2,0.0	nucleotide-binding	1	2	0.0
cytidylyltransferase,1,2,0.0	cytidylyltransferase	1	2	0.0
large-conductance,1,2,0.0	large-conductance	1	2	0.0
mechanosensitive,1,2,0.0	mechanosensitive	1	2	0.0
nitrogenase,1,2,0.0	nitrogenase	1	2	0.0
nifh,1,2,0.0	nifh	1	2	0.0
(atpase),1,2,0.0	(atpase)	1	2	0.0
queuine/archaeosine,1,2,0.0	queuine/archaeosine	1	2	0.0
trna-ribosyltransferase,1,2,0.0	trna-ribosyltransferase	1	2	0.0
molybdenum,1,2,0.0	molybdenum	1	2	0.0
cofactor,1,2,0.0	cofactor	1	2	0.0
phosphoesterase,1,2,0.0	phosphoesterase	1	2	0.0
transport/signal,1,2,0.0	transport/signal	1	2	0.0
component/domain,1,2,0.0
peptidylarginine,1,2,0.0	peptidylarginine	1	2	0.0
deiminase,1,2,0.0	deiminase	1	2	0.0
amidohydrolase,1,2,0.0	amidohydrolase	1	2	0.0
lysine,1,2,0.0	lysine	1	2	0.0
3-aminomutase,1,2,0.0	3-aminomutase	1	2	0.0
drug/metabolite,1,2,0.0	drug/metabolite	1	2	0.0
(dmt),1,2,0.0	(dmt)	1	2	0.0
gtp,1,2,0.0	gtp	1	2	0.0
adenosylcobinamide-phosphate,1,2,0.0	adenosylcobinamide-phosphate	1	2	0.0
guanylyltransferase,1,2,0.0	guanylyltransferase	1	2	0.0
topoisomerase,1,2,0.0	topoisomerase	1	2	0.0
vi,1,2,0.0
uncharacterized conserved,2,62,1.3
conserved protein,2,62,1.3
transport system,2,55,1.1	transport system	2	55	1.1
protein conserved,2,38,0.8
uncharacterized protein,2,40,0.8
membrane protein,2,28,0.6	membrane protein	2	28	0.6
conserved bacteria,2,28,0.6
atpase component,2,23,0.5	atpase component	2	23	0.5
protein predicted,2,24,0.5
permease component,2,19,0.4	permease component	2	19	0.4
system atpase,2,19,0.4	system atpase	2	19	0.4
abc-type transport,2,19,0.4	abc-type transport	2	19	0.4
predicted membrane,2,21,0.4	predicted membrane	2	21	0.4
transcriptional regulators,2,13,0.3	transcriptional regulators	2	13	0.3
predicted transcriptional,2,15,0.3	predicted transcriptional	2	15	0.3
protein uncharacterized,2,15,0.3
ribosomal protein,2,16,0.3	ribosomal protein	2	16	0.3
system involved,2,16,0.3
transport systems,2,16,0.3	transport systems	2	16	0.3
tetrahydromethanopterin s-methyltransferase,2,16,0.3	tetrahydromethanopterin s-methyltransferase	2	16	0.3
s-methyltransferase subunit,2,16,0.3	s-methyltransferase subunit	2	16	0.3
transcriptional regulator,2,10,0.2	transcriptional regulator	2	10	0.2
conserved archaea,2,10,0.2
methyl coenzyme,2,10,0.2	methyl coenzyme	2	10	0.2
coenzyme reductase,2,10,0.2	coenzyme reductase	2	10	0.2
glycyl-trna synthetase,2,11,0.2	glycyl-trna synthetase	2	11	0.2
alpha subunit,2,11,0.2
permease components,2,11,0.2	permease components	2	11	0.2
systems permease,2,11,0.2	systems permease	2	11	0.2
related enzymes,2,12,0.2
system permease,2,12,0.2	system permease	2	12	0.2
involved resistance,2,12,0.2	involved resistance	2	12	0.2
resistance organic,2,12,0.2	resistance organic	2	12	0.2
organic solvents,2,12,0.2	organic solvents	2	12	0.2
component abc-type,2,12,0.2	component abc-type	2	12	0.2
dna-directed rna,2,8,0.2	dna-directed rna	2	8	0.2
rna polymerase,2,8,0.2	rna polymerase	2	8	0.2
sigma subunit,2,8,0.2
pyruvate ferredoxin,2,8,0.2	pyruvate ferredoxin	2	8	0.2
ferredoxin oxidoreductase,2,8,0.2	ferredoxin oxidoreductase	2	8	0.2
oxidoreductase related,2,8,0.2	oxidoreductase related	2	8	0.2
related 2-oxoacid,2,8,0.2	related 2-oxoacid	2	8	0.2
2-oxoacid ferredoxin,2,8,0.2	2-oxoacid ferredoxin	2	8	0.2
ferredoxin oxidoreductases,2,8,0.2	ferredoxin oxidoreductases	2	8	0.2
protein (contains,2,8,0.2
protein abc-type,2,8,0.2	protein abc-type	2	8	0.2
abc-type phosphate,2,8,0.2	abc-type phosphate	2	8	0.2
zn-ribbon protein,2,9,0.2	zn-ribbon protein	2	9	0.2
protein possibly,2,9,0.2
possibly nucleic,2,9,0.2	possibly nucleic	2	9	0.2
nucleic acid-binding,2,9,0.2	nucleic acid-binding	2	9	0.2
related proteins,2,9,0.2
dna rna,2,9,0.2	dna rna	2	9	0.2
rna helicases,2,9,0.2	rna helicases	2	9	0.2
abc-type multidrug,2,9,0.2	abc-type multidrug	2	9	0.2
multidrug transport,2,9,0.2	multidrug transport	2	9	0.2
beta subunit,2,9,0.2
amino acid,2,9,0.2	amino acid	2	9	0.2
predicted rna-binding,2,9,0.2	predicted rna-binding	2	9	0.2
rna-binding protein,2,9,0.2	rna-binding protein	2	9	0.2
abc-type dipeptide/oligopeptide/nickel,2,9,0.2	abc-type dipeptide/oligopeptide/nickel	2	9	0.2
dipeptide/oligopeptide/nickel transport,2,9,0.2	dipeptide/oligopeptide/nickel transport	2	9	0.2
periplasmic component,2,9,0.2	periplasmic component	2	9	0.2
phosphate transport,2,9,0.2	phosphate transport	2	9	0.2
subunit 1,2,3,0.1
1 allophanate,2,3,0.1	1 allophanate	2	3	0.1
subunit 2,2,3,0.1
2 uncharacterized,2,3,0.1
proteins homologs,2,3,0.1
homologs lactam,2,3,0.1	homologs lactam	2	3	0.1
lactam utilization,2,3,0.1	lactam utilization	2	3	0.1
utilization protein,2,3,0.1
fructose-2 6-bisphosphatase,2,3,0.1	fructose-2 6-bisphosphatase	2	3	0.1
glycine/d-amino acid,2,3,0.1	glycine/d-amino acid	2	3	0.1
acid oxidases,2,3,0.1	acid oxidases	2	3	0.1
oxidases (deaminating),2,3,0.1	oxidases (deaminating)	2	3	0.1
formamidopyrimidine-dna glycosylase,2,3,0.1	formamidopyrimidine-dna glycosylase	2	3	0.1
3-deoxy-d-manno-octulosonic-acid transferase,2,3,0.1	3-deoxy-d-manno-octulosonic-acid transferase	2	3	0.1
di- tripeptidases,2,3,0.1	di- tripeptidases	2	3	0.1
dtdp-glucose pyrophosphorylase,2,3,0.1	dtdp-glucose pyrophosphorylase	2	3	0.1
dtdp-4-dehydrorhamnose 3,2,3,0.1	dtdp-4-dehydrorhamnose 3	2	3	0.1
3 5-epimerase,2,3,0.1	3 5-epimerase	2	3	0.1
5-epimerase related,2,3,0.1	5-epimerase related	2	3	0.1
putative primosome,2,3,0.1	putative primosome	2	3	0.1
primosome component,2,3,0.1	primosome component	2	3	0.1
deoxyribodipyrimidine photolyase,2,3,0.1	deoxyribodipyrimidine photolyase	2	3	0.1
pyrrolidone-carboxylate peptidase,2,3,0.1	pyrrolidone-carboxylate peptidase	2	3	0.1
peptidase (n-terminal,2,3,0.1	peptidase (n-terminal	2	3	0.1
(n-terminal pyroglutamyl,2,3,0.1	(n-terminal pyroglutamyl	2	3	0.1
pyroglutamyl peptidase),2,3,0.1	pyroglutamyl peptidase)	2	3	0.1
dtdp-d-glucose 4,2,3,0.1	dtdp-d-glucose 4	2	3	0.1
4 6-dehydratase,2,3,0.1	4 6-dehydratase	2	3	0.1
prolipoprotein diacylglyceryltransferase,2,3,0.1	prolipoprotein diacylglyceryltransferase	2	3	0.1
phosphoribosylcarboxyaminoimidazole (ncair),2,3,0.1	phosphoribosylcarboxyaminoimidazole (ncair)	2	3	0.1
(ncair) mutase,2,3,0.1	(ncair) mutase	2	3	0.1
enzymes uncharacterized,2,3,0.1
gtpases (dynamin-related),2,3,0.1	gtpases (dynamin-related)	2	3	0.1
adenine/guanine phosphoribosyltransferases,2,3,0.1	adenine/guanine phosphoribosyltransferases	2	3	0.1
phosphoribosyltransferases related,2,3,0.1	phosphoribosyltransferases related	2	3	0.1
related prpp-binding,2,3,0.1	related prpp-binding	2	3	0.1
prpp-binding proteins,2,3,0.1	prpp-binding proteins	2	3	0.1
protein l19,2,3,0.1	protein l19	2	3	0.1
predicted divalent,2,3,0.1	predicted divalent	2	3	0.1
divalent heavy-metal,2,3,0.1	divalent heavy-metal	2	3	0.1
heavy-metal cations,2,3,0.1	heavy-metal cations	2	3	0.1
cations transporter,2,3,0.1	cations transporter	2	3	0.1
inorganic pyrophosphatase/exopolyphosphatase,2,3,0.1	inorganic pyrophosphatase/exopolyphosphatase	2	3	0.1
penicillin tolerance,2,3,0.1	penicillin tolerance	2	3	0.1
abc-type uncharacterized,2,3,0.1	abc-type uncharacterized	2	3	0.1
uncharacterized transport,2,3,0.1	uncharacterized transport	2	3	0.1
rimm protein,2,3,0.1	rimm protein	2	3	0.1
required 16s,2,3,0.1	required 16s	2	3	0.1
16s rrna,2,3,0.1	16s rrna	2	3	0.1
rrna processing,2,3,0.1	rrna processing	2	3	0.1
branched-chain amino,2,3,0.1	branched-chain amino	2	3	0.1
hydroxymethylpyrimidine/phosphomethylpyrimidine kinase,2,3,0.1	hydroxymethylpyrimidine/phosphomethylpyrimidine kinase	2	3	0.1
solvents auxiliary,2,3,0.1	solvents auxiliary	2	3	0.1
auxiliary component,2,3,0.1	auxiliary component	2	3	0.1
protein s16,2,3,0.1	protein s16	2	3	0.1
predicted ntp,2,3,0.1	predicted ntp	2	3	0.1
ntp binding,2,3,0.1	ntp binding	2	3	0.1
binding protein,2,3,0.1	binding protein	2	3	0.1
(contains stas,2,3,0.1	(contains stas	2	3	0.1
stas domain),2,3,0.1	stas domain)	2	3	0.1
dgtp triphosphohydrolase,2,3,0.1	dgtp triphosphohydrolase	2	3	0.1
atp phosphoribosyltransferase,2,3,0.1	atp phosphoribosyltransferase	2	3	0.1
glutaredoxin related,2,3,0.1	glutaredoxin related	2	3	0.1
rhodanese-related sulfurtransferase,2,3,0.1	rhodanese-related sulfurtransferase	2	3	0.1
(contains kh,2,3,0.1	(contains kh	2	3	0.1
kh domain),2,3,0.1	kh domain)	2	3	0.1
abc-type mn/zn,2,3,0.1	abc-type mn/zn	2	3	0.1
mn/zn transport,2,3,0.1	mn/zn transport	2	3	0.1
cytochrome mono-,2,3,0.1	cytochrome mono-	2	3	0.1
mono- diheme,2,3,0.1	mono- diheme	2	3	0.1
diheme variants,2,3,0.1	diheme variants	2	3	0.1
membrane lipoprotein,2,3,0.1	membrane lipoprotein	2	3	0.1
stress-induced morphogen,2,3,0.1	stress-induced morphogen	2	3	0.1
morphogen (activity,2,3,0.1	morphogen (activity	2	3	0.1
(activity unknown),2,3,0.1
subunit pyruvate,2,3,0.1	subunit pyruvate	2	3	0.1
solvents permease,2,3,0.1	solvents permease	2	3	0.1
abc-type mn2+/zn2+,2,3,0.1	abc-type mn2+/zn2+	2	3	0.1
mn2+/zn2+ transport,2,3,0.1	mn2+/zn2+ transport	2	3	0.1
histidinol dehydrogenase,2,3,0.1	histidinol dehydrogenase	2	3	0.1
delta subunit,2,3,0.1
anthranilate/para-aminobenzoate synthases,2,3,0.1	anthranilate/para-aminobenzoate synthases	2	3	0.1
synthases component,2,3,0.1	synthases component	2	3	0.1
solvents periplasmic,2,3,0.1	solvents periplasmic	2	3	0.1
pyridoxal phosphate,2,3,0.1	pyridoxal phosphate	2	3	0.1
phosphate biosynthesis,2,3,0.1	phosphate biosynthesis	2	3	0.1
solvents atpase,2,3,0.1	solvents atpase	2	3	0.1
bacteria uncharacterized,2,3,0.1
response regulator,2,3,0.1	response regulator	2	3	0.1
dehydrogenase related,2,3,0.1	dehydrogenase related	2	3	0.1
abc-type sugar,2,3,0.1	abc-type sugar	2	3	0.1
sugar transport,2,3,0.1	sugar transport	2	3	0.1
peptide methionine,2,3,0.1	peptide methionine	2	3	0.1
methionine sulfoxide,2,3,0.1	methionine sulfoxide	2	3	0.1
sulfoxide reductase,2,3,0.1	sulfoxide reductase	2	3	0.1
valyl-trna synthetase,2,3,0.1	valyl-trna synthetase	2	3	0.1
biosynthesis enzyme,2,3,0.1	biosynthesis enzyme	2	3	0.1
abc-type dipeptide,2,3,0.1	abc-type dipeptide	2	3	0.1
dipeptide transport,2,3,0.1	dipeptide transport	2	3	0.1
(sigma70/sigma32) dna,2,3,0.1	(sigma70/sigma32) dna	2	3	0.1
components predicted,2,3,0.1
protein kinase,2,3,0.1	protein kinase	2	3	0.1
molecular chaperone,2,3,0.1	molecular chaperone	2	3	0.1
repair enzyme,2,3,0.1	repair enzyme	2	3	0.1
metal-binding protein,2,3,0.1	metal-binding protein	2	3	0.1
sh3 domain,2,3,0.1	sh3 domain	2	3	0.1
domain protein,2,3,0.1
hydrolase (had,2,3,0.1	hydrolase (had	2	3	0.1
(had superfamily),2,3,0.1	(had superfamily)	2	3	0.1
predicted permease,2,3,0.1	predicted permease	2	3	0.1
transporters udp-glucose,2,3,0.1	transporters udp-glucose	2	3	0.1
udp-glucose 4-epimerase,2,3,0.1	udp-glucose 4-epimerase	2	3	0.1
alpha/beta superfamily,2,3,0.1	alpha/beta superfamily	2	3	0.1
enzyme predicted,2,3,0.1
protein dna-directed,2,3,0.1	protein dna-directed	2	3	0.1
histidine kinase,2,3,0.1	histidine kinase	2	3	0.1
predicted integral,2,3,0.1	predicted integral	2	3	0.1
integral membrane,2,3,0.1	integral membrane	2	3	0.1
a/g-specific dna,2,4,0.1	a/g-specific dna	2	4	0.1
pseudouridylate synthases,2,4,0.1	pseudouridylate synthases	2	4	0.1
synthases 23s,2,4,0.1	synthases 23s	2	4	0.1
23s rna-specific,2,4,0.1	23s rna-specific	2	4	0.1
component related,2,4,0.1
endonuclease iv,2,4,0.1	endonuclease iv	2	4	0.1
signal recognition,2,4,0.1	signal recognition	2	4	0.1
recognition particle,2,4,0.1	recognition particle	2	4	0.1
particle gtpase,2,4,0.1	particle gtpase	2	4	0.1
ntp pyrophosphohydrolases,2,4,0.1	ntp pyrophosphohydrolases	2	4	0.1
pyrophosphohydrolases including,2,4,0.1	pyrophosphohydrolases including	2	4	0.1
including oxidative,2,4,0.1	including oxidative	2	4	0.1
oxidative damage,2,4,0.1	oxidative damage	2	4	0.1
damage repair,2,4,0.1	damage repair	2	4	0.1
repair enzymes,2,4,0.1	repair enzymes	2	4	0.1
predicted endoiii-related,2,4,0.1	predicted endoiii-related	2	4	0.1
endoiii-related endonuclease,2,4,0.1	endoiii-related endonuclease	2	4	0.1
chromosome segregation,2,4,0.1	chromosome segregation	2	4	0.1
segregation atpases,2,4,0.1	segregation atpases	2	4	0.1
predicted gtpases,2,4,0.1	predicted gtpases	2	4	0.1
tolerance protein,2,4,0.1	tolerance protein	2	4	0.1
translation elongation,2,4,0.1	translation elongation	2	4	0.1
elongation factor,2,4,0.1	elongation factor	2	4	0.1
udp-n-acetylglucosamine enolpyruvyl,2,4,0.1	udp-n-acetylglucosamine enolpyruvyl	2	4	0.1
enolpyruvyl transferase,2,4,0.1	enolpyruvyl transferase	2	4	0.1
fe2+/zn2+ uptake,2,4,0.1	fe2+/zn2+ uptake	2	4	0.1
uptake regulation,2,4,0.1	uptake regulation	2	4	0.1
regulation proteins,2,4,0.1	regulation proteins	2	4	0.1
synthetase beta,2,4,0.1	synthetase beta	2	4	0.1
protein required,2,4,0.1
parvulin-like peptidyl-prolyl,2,4,0.1	parvulin-like peptidyl-prolyl	2	4	0.1
peptidyl-prolyl isomerase,2,4,0.1	peptidyl-prolyl isomerase	2	4	0.1
protein cytochrome,2,4,0.1	protein cytochrome	2	4	0.1
gamma subunit,2,4,0.1
regulators uncharacterized,2,4,0.1	regulators uncharacterized	2	4	0.1
atpase components,2,4,0.1	atpase components	2	4	0.1
predicted zn-dependent,2,4,0.1	predicted zn-dependent	2	4	0.1
zn-dependent hydrolases,2,4,0.1	zn-dependent hydrolases	2	4	0.1
fe-s protein,2,4,0.1	fe-s protein	2	4	0.1
synthetase predicted,2,4,0.1	synthetase predicted	2	4	0.1
predicted atpase,2,4,0.1	predicted atpase	2	4	0.1
dna repair,2,4,0.1	dna repair	2	4	0.1
superfamily predicted,2,4,0.1
hd superfamily,2,4,0.1	hd superfamily	2	4	0.1
acid transporters,2,4,0.1	acid transporters	2	4	0.1
diadenosine tetraphosphatase,2,4,0.1	diadenosine tetraphosphatase	2	4	0.1
tetraphosphatase related,2,4,0.1	tetraphosphatase related	2	4	0.1
related serine/threonine,2,4,0.1	related serine/threonine	2	4	0.1
protein phosphatases,2,4,0.1	protein phosphatases	2	4	0.1
atp-dependent dna,2,4,0.1	atp-dependent dna	2	4	0.1
chey-like receiver,2,4,0.1	chey-like receiver	2	4	0.1
receiver domain,2,4,0.1	receiver domain	2	4	0.1
k+-transporting atpase,2,4,0.1	k+-transporting atpase	2	4	0.1
superfamily dna,2,4,0.1	superfamily dna	2	4	0.1
phosphotransferase system,2,4,0.1	phosphotransferase system	2	4	0.1
archaea predicted,2,4,0.1
proteins methyl,2,4,0.1	proteins methyl	2	4	0.1
reductase subunit,2,4,0.1	reductase subunit	2	4	0.1
cluster assembly,2,4,0.1	cluster assembly	2	4	0.1
subunit tetrahydromethanopterin,2,4,0.1	subunit tetrahydromethanopterin	2	4	0.1
histidinol-phosphate/aromatic aminotransferase,2,5,0.1	histidinol-phosphate/aromatic aminotransferase	2	5	0.1
aminotransferase cobyric,2,5,0.1	aminotransferase cobyric	2	5	0.1
cobyric acid,2,5,0.1	cobyric acid	2	5	0.1
acid decarboxylase,2,5,0.1	acid decarboxylase	2	5	0.1
glycerol-3-phosphate dehydrogenase,2,5,0.1	glycerol-3-phosphate dehydrogenase	2	5	0.1
homoserine trans-succinylase,2,5,0.1	homoserine trans-succinylase	2	5	0.1
collagenase related,2,5,0.1	collagenase related	2	5	0.1
related proteases,2,5,0.1	related proteases	2	5	0.1
ii dna,2,5,0.1	ii dna	2	5	0.1
multimeric flavodoxin,2,5,0.1	multimeric flavodoxin	2	5	0.1
flavodoxin wrba,2,5,0.1	flavodoxin wrba	2	5	0.1
dna polymerase,2,5,0.1	dna polymerase	2	5	0.1
biosynthesis protein,2,5,0.1
pp-loop superfamily,2,5,0.1	pp-loop superfamily	2	5	0.1
dehydrogenases specificities,2,5,0.1	dehydrogenases specificities	2	5	0.1
specificities (related,2,5,0.1
(related short-chain,2,5,0.1	(related short-chain	2	5	0.1
short-chain alcohol,2,5,0.1	short-chain alcohol	2	5	0.1
alcohol dehydrogenases),2,5,0.1	alcohol dehydrogenases)	2	5	0.1
sam-dependent methyltransferases,2,5,0.1	sam-dependent methyltransferases	2	5	0.1
component uncharacterized,2,5,0.1
repeat predicted,2,5,0.1
involved fe-s,2,5,0.1	involved fe-s	2	5	0.1
fe-s cluster,2,5,0.1	fe-s cluster	2	5	0.1
hydrolases acyltransferases,2,5,0.1	hydrolases acyltransferases	2	5	0.1
acyltransferases (alpha/beta,2,5,0.1	acyltransferases (alpha/beta	2	5	0.1
(alpha/beta hydrolase,2,5,0.1	(alpha/beta hydrolase	2	5	0.1
hydrolase superfamily),2,5,0.1	hydrolase superfamily)	2	5	0.1
subunit abc-type,2,5,0.1	subunit abc-type	2	5	0.1
synthase uncharacterized,2,5,0.1	synthase uncharacterized	2	5	0.1
serine/threonine protein,2,5,0.1	serine/threonine protein	2	5	0.1
dna-binding domain,2,5,0.1	dna-binding domain	2	5	0.1
predicted sam-dependent,2,6,0.1	predicted sam-dependent	2	6	0.1
sam-dependent methyltransferase,2,6,0.1	sam-dependent methyltransferase	2	6	0.1
allophanate hydrolase,2,6,0.1	allophanate hydrolase	2	6	0.1
hydrolase subunit,2,6,0.1	hydrolase subunit	2	6	0.1
uncharacterized proteins,2,6,0.1
dna glycosylase,2,6,0.1	dna glycosylase	2	6	0.1
dna primase,2,6,0.1	dna primase	2	6	0.1
primase (bacterial,2,6,0.1	primase (bacterial	2	6	0.1
(bacterial type),2,6,0.1
synthetase alpha,2,6,0.1	synthetase alpha	2	6	0.1
bacteria predicted,2,6,0.1
systems atpase,2,6,0.1	systems atpase	2	6	0.1
outer membrane,2,6,0.1	outer membrane	2	6	0.1
fog tpr,2,6,0.1	fog tpr	2	6	0.1
tpr repeat,2,6,0.1	tpr repeat	2	6	0.1
protein zn-ribbon,2,6,0.1	protein zn-ribbon	2	6	0.1
subunit predicted,2,6,0.1
permeases major,2,6,0.1	permeases major	2	6	0.1
major facilitator,2,6,0.1	major facilitator	2	6	0.1
facilitator superfamily,2,6,0.1	facilitator superfamily	2	6	0.1
dna ligase,2,6,0.1	dna ligase	2	6	0.1
predicted hydrolase,2,6,0.1	predicted hydrolase	2	6	0.1
atpase chain,2,6,0.1	atpase chain	2	6	0.1
subunit methyl,2,6,0.1	subunit methyl	2	6	0.1
component tetrahydromethanopterin,2,6,0.1	component tetrahydromethanopterin	2	6	0.1
polymerase sigma,2,7,0.1	polymerase sigma	2	7	0.1
subunit (sigma70/sigma32),2,7,0.1	subunit (sigma70/sigma32)	2	7	0.1
superfamily ii,2,7,0.1
system periplasmic,2,7,0.1	system periplasmic	2	7	0.1
subunit uncharacterized,2,7,0.1
component predicted,2,7,0.1
predicted hydrolases,2,7,0.1	predicted hydrolases	2	7	0.1
acid-binding allophanate,2,1,0.0	acid-binding allophanate	2	1	0.0
protein fructose-2,2,1,0.0	protein fructose-2	2	1	0.0
ribonuclease glycine/d-amino,2,1,0.0	ribonuclease glycine/d-amino	2	1	0.0
(deaminating) dna-directed,2,1,0.0	(deaminating) dna-directed	2	1	0.0
(sigma70/sigma32) formamidopyrimidine-dna,2,1,0.0	(sigma70/sigma32) formamidopyrimidine-dna	2	1	0.0
glycosylase a/g-specific,2,1,0.0	glycosylase a/g-specific	2	1	0.0
glycosylase dna,2,1,0.0	glycosylase dna	2	1	0.0
subunit 3-deoxy-d-manno-octulosonic-acid,2,1,0.0	subunit 3-deoxy-d-manno-octulosonic-acid	2	1	0.0
transferase di-,2,1,0.0	transferase di-	2	1	0.0
tripeptidases dtdp-glucose,2,1,0.0	tripeptidases dtdp-glucose	2	1	0.0
enzymes pseudouridylate,2,1,0.0	enzymes pseudouridylate	2	1	0.0
rna-specific histidinol-phosphate/aromatic,2,1,0.0	rna-specific histidinol-phosphate/aromatic	2	1	0.0
decarboxylase putative,2,1,0.0	decarboxylase putative	2	1	0.0
ii) deoxyribodipyrimidine,2,1,0.0	ii) deoxyribodipyrimidine	2	1	0.0
photolyase glycerol-3-phosphate,2,1,0.0	photolyase glycerol-3-phosphate	2	1	0.0
protein homoserine,2,1,0.0	protein homoserine	2	1	0.0
trans-succinylase collagenase,2,1,0.0	trans-succinylase collagenase	2	1	0.0
proteases pyrrolidone-carboxylate,2,1,0.0	proteases pyrrolidone-carboxylate	2	1	0.0
peptidase) dtdp-d-glucose,2,1,0.0	peptidase) dtdp-d-glucose	2	1	0.0
6-dehydratase endonuclease,2,1,0.0	6-dehydratase endonuclease	2	1	0.0
iv nitroreductase,2,1,0.0	iv nitroreductase	2	1	0.0
nitroreductase signal,2,1,0.0	nitroreductase signal	2	1	0.0
protein prolipoprotein,2,1,0.0	protein prolipoprotein	2	1	0.0
diacylglyceryltransferase phosphoribosylcarboxyaminoimidazole,2,1,0.0	diacylglyceryltransferase phosphoribosylcarboxyaminoimidazole	2	1	0.0
mutase ntp,2,1,0.0	mutase ntp	2	1	0.0
endonuclease chromosome,2,1,0.0	endonuclease chromosome	2	1	0.0
atpases superfamily,2,1,0.0	atpases superfamily	2	1	0.0
helicases predicted,2,1,0.0	helicases predicted	2	1	0.0
(dynamin-related) adenine/guanine,2,1,0.0	(dynamin-related) adenine/guanine	2	1	0.0
proteins multimeric,2,1,0.0
wrba uncharacterized,2,1,0.0	wrba uncharacterized	2	1	0.0
l19 uncharacterized,2,1,0.0	l19 uncharacterized	2	1	0.0
transporter ribosomal,2,1,0.0	transporter ribosomal	2	1	0.0
s2 uncharacterized,2,1,0.0	s2 uncharacterized	2	1	0.0
pyrophosphatase/exopolyphosphatase transcriptional,2,1,0.0	pyrophosphatase/exopolyphosphatase transcriptional	2	1	0.0
regulators lipoprotein,2,1,0.0	regulators lipoprotein	2	1	0.0
peptidase penicillin,2,1,0.0	peptidase penicillin	2	1	0.0
protein translation,2,1,0.0	protein translation	2	1	0.0
ts 5,2,1,0.0	ts 5	2	1	0.0
bacteria acetyltransferase,2,1,0.0	bacteria acetyltransferase	2	1	0.0
superfamily) udp-n-acetylglucosamine,2,1,0.0	superfamily) udp-n-acetylglucosamine	2	1	0.0
component thymidylate,2,1,0.0	component thymidylate	2	1	0.0
kinase fe2+/zn2+,2,1,0.0	kinase fe2+/zn2+	2	1	0.0
components glycyl-trna,2,1,0.0	components glycyl-trna	2	1	0.0
subunit dna,2,1,0.0	subunit dna	2	1	0.0
domains rimm,2,1,0.0	domains rimm	2	1	0.0
processing uncharacterized,2,1,0.0	processing uncharacterized	2	1	0.0
periplasmic component/surface,2,1,0.0	periplasmic component/surface	2	1	0.0
component/surface lipoprotein,2,1,0.0	component/surface lipoprotein	2	1	0.0
lipoprotein branched-chain,2,1,0.0	lipoprotein branched-chain	2	1	0.0
lyase fkbp-type,2,1,0.0	lyase fkbp-type	2	1	0.0
factor) thiamine,2,1,0.0	factor) thiamine	2	1	0.0
synthase hydroxymethylpyrimidine/phosphomethylpyrimidine,2,1,0.0	synthase hydroxymethylpyrimidine/phosphomethylpyrimidine	2	1	0.0
kinase trna-(guanine-n1)-methyltransferase,2,1,0.0	kinase trna-(guanine-n1)-methyltransferase	2	1	0.0
trna-(guanine-n1)-methyltransferase uncharacterized,2,1,0.0	trna-(guanine-n1)-methyltransferase uncharacterized	2	1	0.0
oxidoreductase 6-pyruvoyl-tetrahydropterin,2,1,0.0	oxidoreductase 6-pyruvoyl-tetrahydropterin	2	1	0.0
synthase pyruvate,2,1,0.0	synthase pyruvate	2	1	0.0
bacteria abc-type,2,1,0.0	bacteria abc-type	2	1	0.0
s16 molybdopterin-guanine,2,1,0.0	s16 molybdopterin-guanine	2	1	0.0
domain) histidinol,2,1,0.0	domain) histidinol	2	1	0.0
domain dgtp,2,1,0.0	domain dgtp	2	1	0.0
triphosphohydrolase 7,2,1,0.0	triphosphohydrolase 7	2	1	0.0
protein antitoxin,2,1,0.0	protein antitoxin	2	1	0.0
system predicted,2,1,0.0
atpase atp,2,1,0.0	atpase atp	2	1	0.0
phosphoribosyltransferase dehydrogenases,2,1,0.0	phosphoribosyltransferase dehydrogenases	2	1	0.0
dehydrogenases) glutaredoxin,2,1,0.0	dehydrogenases) glutaredoxin	2	1	0.0
proteins uncharacterized,2,1,0.0
pyrophosphatase rhodanese-related,2,1,0.0	pyrophosphatase rhodanese-related	2	1	0.0
sulfurtransferase predicted,2,1,0.0	sulfurtransferase predicted	2	1	0.0
domain) abc-type,2,1,0.0	domain) abc-type	2	1	0.0
component dihydroneopterin,2,1,0.0	component dihydroneopterin	2	1	0.0
dihydroneopterin aldolase,2,1,0.0	dihydroneopterin aldolase	2	1	0.0
aldolase abc-type,2,1,0.0	aldolase abc-type	2	1	0.0
component parvulin-like,2,1,0.0	component parvulin-like	2	1	0.0
isomerase uncharacterized,2,1,0.0	isomerase uncharacterized	2	1	0.0
variants outer,2,1,0.0	variants outer	2	1	0.0
lipoprotein sam-dependent,2,1,0.0	lipoprotein sam-dependent	2	1	0.0
methyltransferases uncharacterized,2,1,0.0	methyltransferases uncharacterized	2	1	0.0
bacteria type,2,1,0.0
glycosidases stress-induced,2,1,0.0	glycosidases stress-induced	2	1	0.0
unknown) pyruvate,2,1,0.0	unknown) pyruvate	2	1	0.0
subunit putative,2,1,0.0
(sua5) abc-type,2,1,0.0	(sua5) abc-type	2	1	0.0
components cystathionine,2,1,0.0	components cystathionine	2	1	0.0
gamma-synthases atpases,2,1,0.0	gamma-synthases atpases	2	1	0.0
atpases involved,2,1,0.0	atpases involved	2	1	0.0
involved chromosome,2,1,0.0	involved chromosome	2	1	0.0
chromosome partitioning,2,1,0.0	chromosome partitioning	2	1	0.0
partitioning d-mannonate,2,1,0.0	partitioning d-mannonate	2	1	0.0
dehydratase histidinol,2,1,0.0	dehydratase histidinol	2	1	0.0
dehydrogenase pyruvate,2,1,0.0	dehydrogenase pyruvate	2	1	0.0
subunit anthranilate/para-aminobenzoate,2,1,0.0	subunit anthranilate/para-aminobenzoate	2	1	0.0
component atp-dependent,2,1,0.0	component atp-dependent	2	1	0.0
type abc-type,2,1,0.0	type abc-type	2	1	0.0
components abc-type,2,1,0.0	components abc-type	2	1	0.0
component orotate,2,1,0.0	component orotate	2	1	0.0
phosphoribosyltransferase predicted,2,1,0.0	phosphoribosyltransferase predicted	2	1	0.0
fold fog,2,1,0.0	fold fog	2	1	0.0
repeat pyridoxal,2,1,0.0	repeat pyridoxal	2	1	0.0
acid-binding fructose-2,2,1,0.0	acid-binding fructose-2	2	1	0.0
ribonuclease histidinol-phosphate/aromatic,2,1,0.0	ribonuclease histidinol-phosphate/aromatic	2	1	0.0
decarboxylase ntp,2,1,0.0	decarboxylase ntp	2	1	0.0
enzymes dna,2,1,0.0	enzymes dna	2	1	0.0
domains 5,2,1,0.0
protein type,2,1,0.0
glycosidases response,2,1,0.0	glycosidases response	2	1	0.0
regulator putative,2,1,0.0	regulator putative	2	1	0.0
putative antiterminator,2,1,0.0	putative antiterminator	2	1	0.0
antiterminator output,2,1,0.0	antiterminator output	2	1	0.0
output domain,2,1,0.0
domain antitoxin,2,1,0.0	domain antitoxin	2	1	0.0
system phosphopantothenoylcysteine,2,1,0.0	system phosphopantothenoylcysteine	2	1	0.0
synthetase/decarboxylase pentose-5-phosphate-3-epimerase,2,1,0.0	synthetase/decarboxylase pentose-5-phosphate-3-epimerase	2	1	0.0
pentose-5-phosphate-3-epimerase cysteine,2,1,0.0	pentose-5-phosphate-3-epimerase cysteine	2	1	0.0
cysteine sulfinate,2,1,0.0	cysteine sulfinate	2	1	0.0
sulfinate desulfinase/cysteine,2,1,0.0	sulfinate desulfinase/cysteine	2	1	0.0
desulfinase/cysteine desulfurase,2,1,0.0	desulfinase/cysteine desulfurase	2	1	0.0
desulfurase related,2,1,0.0	desulfurase related	2	1	0.0
regulators histidinol,2,1,0.0	regulators histidinol	2	1	0.0
family na+/proline,2,1,0.0	family na+/proline	2	1	0.0
na+/proline symporter,2,1,0.0	na+/proline symporter	2	1	0.0
symporter predicted,2,1,0.0	symporter predicted	2	1	0.0
regulator n-methylhydantoinase,2,1,0.0	regulator n-methylhydantoinase	2	1	0.0
n-methylhydantoinase a/acetone,2,1,0.0	n-methylhydantoinase a/acetone	2	1	0.0
a/acetone carboxylase,2,1,0.0	a/acetone carboxylase	2	1	0.0
carboxylase beta,2,1,0.0	carboxylase beta	2	1	0.0
subunit dehydrogenases,2,1,0.0	subunit dehydrogenases	2	1	0.0
dehydrogenases) methionine,2,1,0.0	dehydrogenases) methionine	2	1	0.0
methionine synthase,2,1,0.0	methionine synthase	2	1	0.0
synthase ii,2,1,0.0	synthase ii	2	1	0.0
ii (cobalamin-independent),2,1,0.0	ii (cobalamin-independent)	2	1	0.0
(cobalamin-independent) predicted,2,1,0.0	(cobalamin-independent) predicted	2	1	0.0
gtpases threonine,2,1,0.0	gtpases threonine	2	1	0.0
threonine dehydrogenase,2,1,0.0	threonine dehydrogenase	2	1	0.0
related zn-dependent,2,1,0.0	related zn-dependent	2	1	0.0
zn-dependent dehydrogenases,2,1,0.0	zn-dependent dehydrogenases	2	1	0.0
dehydrogenases lactoylglutathione,2,1,0.0	dehydrogenases lactoylglutathione	2	1	0.0
lyases uncharacterized,2,1,0.0	lyases uncharacterized	2	1	0.0
transcriptional regulator/sugar,2,1,0.0	transcriptional regulator/sugar	2	1	0.0
regulator/sugar kinase,2,1,0.0	regulator/sugar kinase	2	1	0.0
fog wd40,2,1,0.0	fog wd40	2	1	0.0
wd40 repeat,2,1,0.0	wd40 repeat	2	1	0.0
predicted permeases,2,1,0.0	predicted permeases	2	1	0.0
permeases nifu,2,1,0.0	permeases nifu	2	1	0.0
nifu homolog,2,1,0.0	nifu homolog	2	1	0.0
homolog involved,2,1,0.0
cluster formation,2,1,0.0	cluster formation	2	1	0.0
formation predicted,2,1,0.0
protein chromosome,2,1,0.0	protein chromosome	2	1	0.0
predicted signal-transduction,2,1,0.0	predicted signal-transduction	2	1	0.0
signal-transduction protein,2,1,0.0	signal-transduction protein	2	1	0.0
protein camp-binding,2,1,0.0	protein camp-binding	2	1	0.0
camp-binding cbs,2,1,0.0	camp-binding cbs	2	1	0.0
cbs domains,2,1,0.0	cbs domains	2	1	0.0
domains glycerol-3-phosphate,2,1,0.0	domains glycerol-3-phosphate	2	1	0.0
dehydrogenase 6-pyruvoyl-tetrahydropterin,2,1,0.0	dehydrogenase 6-pyruvoyl-tetrahydropterin	2	1	0.0
synthase cystathionine,2,1,0.0	synthase cystathionine	2	1	0.0
gamma-synthases n-methylhydantoinase,2,1,0.0	gamma-synthases n-methylhydantoinase	2	1	0.0
n-methylhydantoinase b/acetone,2,1,0.0	n-methylhydantoinase b/acetone	2	1	0.0
b/acetone carboxylase,2,1,0.0	b/acetone carboxylase	2	1	0.0
carboxylase alpha,2,1,0.0	carboxylase alpha	2	1	0.0
predicted gtpase,2,1,0.0	predicted gtpase	2	1	0.0
gtpase permeases,2,1,0.0	gtpase permeases	2	1	0.0
protein serine,2,1,0.0	protein serine	2	1	0.0
serine protease,2,1,0.0	serine protease	2	1	0.0
protease inhibitor,2,1,0.0	protease inhibitor	2	1	0.0
inhibitor abc-type,2,1,0.0	inhibitor abc-type	2	1	0.0
components orotate,2,1,0.0	components orotate	2	1	0.0
phosphoribosyltransferase alpha-galactosidases/6-phospho-beta-glucosidases,2,1,0.0	phosphoribosyltransferase alpha-galactosidases/6-phospho-beta-glucosidases	2	1	0.0
alpha-galactosidases/6-phospho-beta-glucosidases family,2,1,0.0	alpha-galactosidases/6-phospho-beta-glucosidases family	2	1	0.0
family 4,2,1,0.0
4 glycosyl,2,1,0.0	4 glycosyl	2	1	0.0
component exoribonuclease,2,1,0.0	component exoribonuclease	2	1	0.0
exoribonuclease abc-type,2,1,0.0	exoribonuclease abc-type	2	1	0.0
predicted n-acetylglucosamine,2,1,0.0	predicted n-acetylglucosamine	2	1	0.0
n-acetylglucosamine kinase,2,1,0.0	n-acetylglucosamine kinase	2	1	0.0
kinase selenocysteine,2,1,0.0	kinase selenocysteine	2	1	0.0
selenocysteine lyase,2,1,0.0	selenocysteine lyase	2	1	0.0
predicted sugar,2,1,0.0	predicted sugar	2	1	0.0
sugar phosphatases,2,1,0.0	sugar phosphatases	2	1	0.0
phosphatases superfamily,2,1,0.0	phosphatases superfamily	2	1	0.0
superfamily rhodanese-related,2,1,0.0	superfamily rhodanese-related	2	1	0.0
sulfurtransferase lysophospholipase,2,1,0.0	sulfurtransferase lysophospholipase	2	1	0.0
lysophospholipase uncharacterized,2,1,0.0	lysophospholipase uncharacterized	2	1	0.0
acid-binding thiol-disulfide,2,1,0.0	acid-binding thiol-disulfide	2	1	0.0
thiol-disulfide isomerase,2,1,0.0	thiol-disulfide isomerase	2	1	0.0
isomerase thioredoxins,2,1,0.0	isomerase thioredoxins	2	1	0.0
thioredoxins fog,2,1,0.0	thioredoxins fog	2	1	0.0
superfamily) 6-phosphofructokinase,2,1,0.0	superfamily) 6-phosphofructokinase	2	1	0.0
6-phosphofructokinase permeases,2,1,0.0	6-phosphofructokinase permeases	2	1	0.0
superfamily aspartyl-trna,2,1,0.0	superfamily aspartyl-trna	2	1	0.0
aspartyl-trna synthetase,2,1,0.0	aspartyl-trna synthetase	2	1	0.0
reductase uncharacterized,2,1,0.0	reductase uncharacterized	2	1	0.0
bacteria anthranilate/para-aminobenzoate,2,1,0.0	bacteria anthranilate/para-aminobenzoate	2	1	0.0
component valyl-trna,2,1,0.0	component valyl-trna	2	1	0.0
synthetase abc-type,2,1,0.0	synthetase abc-type	2	1	0.0
abc-type spermidine/putrescine,2,1,0.0	abc-type spermidine/putrescine	2	1	0.0
spermidine/putrescine transport,2,1,0.0	spermidine/putrescine transport	2	1	0.0
components membrane,2,1,0.0	components membrane	2	1	0.0
metalloendopeptidases predicted,2,1,0.0	metalloendopeptidases predicted	2	1	0.0
atpase pp-loop,2,1,0.0	atpase pp-loop	2	1	0.0
superfamily implicated,2,1,0.0
implicated cell,2,1,0.0
cell cycle,2,1,0.0	cell cycle	2	1	0.0
cycle control,2,1,0.0	cycle control	2	1	0.0
control phenylalanyl-trna,2,1,0.0	control phenylalanyl-trna	2	1	0.0
phenylalanyl-trna synthetase,2,1,0.0	phenylalanyl-trna synthetase	2	1	0.0
endonuclease phosphoribosylaminoimidazolesuccinocarboxamide,2,1,0.0	endonuclease phosphoribosylaminoimidazolesuccinocarboxamide	2	1	0.0
phosphoribosylaminoimidazolesuccinocarboxamide (saicar),2,1,0.0	phosphoribosylaminoimidazolesuccinocarboxamide (saicar)	2	1	0.0
(saicar) synthase,2,1,0.0	(saicar) synthase	2	1	0.0
synthase excinuclease,2,1,0.0	synthase excinuclease	2	1	0.0
excinuclease atpase,2,1,0.0	excinuclease atpase	2	1	0.0
atpase subunit,2,1,0.0	atpase subunit	2	1	0.0
regulators dna,2,1,0.0	regulators dna	2	1	0.0
repair proteins,2,1,0.0	repair proteins	2	1	0.0
proteins superfamily,2,1,0.0
helicases ribosomal,2,1,0.0	helicases ribosomal	2	1	0.0
protein s1,2,1,0.0	protein s1	2	1	0.0
s1 uncharacterized,2,1,0.0	s1 uncharacterized	2	1	0.0
proteins lmbe,2,1,0.0	proteins lmbe	2	1	0.0
lmbe homologs,2,1,0.0	lmbe homologs	2	1	0.0
homologs uncharacterized,2,1,0.0
protein von,2,1,0.0
von willebrand,2,1,0.0	von willebrand	2	1	0.0
willebrand factor,2,1,0.0	willebrand factor	2	1	0.0
factor type,2,1,0.0
type (vwa),2,1,0.0	type (vwa)	2	1	0.0
(vwa) domain,2,1,0.0	(vwa) domain	2	1	0.0
domain aspartate/tyrosine/aromatic,2,1,0.0	domain aspartate/tyrosine/aromatic	2	1	0.0
aspartate/tyrosine/aromatic aminotransferase,2,1,0.0	aspartate/tyrosine/aromatic aminotransferase	2	1	0.0
aminotransferase abc-type,2,1,0.0	aminotransferase abc-type	2	1	0.0
protein a/g-specific,2,1,0.0	protein a/g-specific	2	1	0.0
glycosylase oligoendopeptidase,2,1,0.0	glycosylase oligoendopeptidase	2	1	0.0
oligoendopeptidase pseudouridylate,2,1,0.0	oligoendopeptidase pseudouridylate	2	1	0.0
rna-specific uncharacterized,2,1,0.0	rna-specific uncharacterized	2	1	0.0
protein thymidylate,2,1,0.0	protein thymidylate	2	1	0.0
protein lactoylglutathione,2,1,0.0	protein lactoylglutathione	2	1	0.0
lyases glutamine,2,1,0.0	lyases glutamine	2	1	0.0
glutamine cyclotransferase,2,1,0.0	glutamine cyclotransferase	2	1	0.0
cyclotransferase udp-n-acetylmuramyl,2,1,0.0	cyclotransferase udp-n-acetylmuramyl	2	1	0.0
udp-n-acetylmuramyl tripeptide,2,1,0.0	udp-n-acetylmuramyl tripeptide	2	1	0.0
tripeptide synthase,2,1,0.0	tripeptide synthase	2	1	0.0
synthase rhodanese-related,2,1,0.0	synthase rhodanese-related	2	1	0.0
sulfurtransferase ketosteroid,2,1,0.0	sulfurtransferase ketosteroid	2	1	0.0
ketosteroid isomerase-related,2,1,0.0	ketosteroid isomerase-related	2	1	0.0
isomerase-related protein,2,1,0.0	isomerase-related protein	2	1	0.0
reductase thiamine,2,1,0.0	reductase thiamine	2	1	0.0
thiamine biosynthesis,2,1,0.0	thiamine biosynthesis	2	1	0.0
enzyme thih,2,1,0.0	enzyme thih	2	1	0.0
thih related,2,1,0.0	thih related	2	1	0.0
related uncharacterized,2,1,0.0
uncharacterized enzymes,2,1,0.0
predicted 6-phosphogluconate,2,1,0.0	predicted 6-phosphogluconate	2	1	0.0
6-phosphogluconate dehydrogenase,2,1,0.0	6-phosphogluconate dehydrogenase	2	1	0.0
dehydrogenase serine-pyruvate,2,1,0.0	dehydrogenase serine-pyruvate	2	1	0.0
serine-pyruvate aminotransferase/archaeal,2,1,0.0	serine-pyruvate aminotransferase/archaeal	2	1	0.0
aminotransferase/archaeal aspartate,2,1,0.0	aminotransferase/archaeal aspartate	2	1	0.0
aspartate aminotransferase,2,1,0.0	aspartate aminotransferase	2	1	0.0
aminotransferase predicted,2,1,0.0	aminotransferase predicted	2	1	0.0
predicted periplasmic,2,1,0.0	predicted periplasmic	2	1	0.0
periplasmic solute-binding,2,1,0.0	periplasmic solute-binding	2	1	0.0
solute-binding protein,2,1,0.0	solute-binding protein	2	1	0.0
peptidases glucoamylase,2,1,0.0	peptidases glucoamylase	2	1	0.0
glucoamylase related,2,1,0.0	glucoamylase related	2	1	0.0
related glycosyl,2,1,0.0	related glycosyl	2	1	0.0
component glucose-6-p,2,1,0.0	component glucose-6-p	2	1	0.0
glucose-6-p dehydrogenase,2,1,0.0	glucose-6-p dehydrogenase	2	1	0.0
dehydrogenase subunit,2,1,0.0	dehydrogenase subunit	2	1	0.0
subunit 6-phosphogluconolactonase/glucosamine-6-phosphate,2,1,0.0	subunit 6-phosphogluconolactonase/glucosamine-6-phosphate	2	1	0.0
6-phosphogluconolactonase/glucosamine-6-phosphate isomerase/deaminase,2,1,0.0	6-phosphogluconolactonase/glucosamine-6-phosphate isomerase/deaminase	2	1	0.0
isomerase/deaminase uncharacterized,2,1,0.0	isomerase/deaminase uncharacterized	2	1	0.0
components glucose-6-phosphate,2,1,0.0	components glucose-6-phosphate	2	1	0.0
glucose-6-phosphate 1-dehydrogenase,2,1,0.0	glucose-6-phosphate 1-dehydrogenase	2	1	0.0
1-dehydrogenase dehydrogenases,2,1,0.0	1-dehydrogenase dehydrogenases	2	1	0.0
dehydrogenases) abc-type,2,1,0.0	dehydrogenases) abc-type	2	1	0.0
abc-type oligopeptide,2,1,0.0	abc-type oligopeptide	2	1	0.0
oligopeptide transport,2,1,0.0	oligopeptide transport	2	1	0.0
component dna,2,1,0.0	component dna	2	1	0.0
repair photolyase,2,1,0.0	repair photolyase	2	1	0.0
photolyase predicted,2,1,0.0	photolyase predicted	2	1	0.0
predicted kinase,2,1,0.0	predicted kinase	2	1	0.0
tripeptidases dna-directed,2,1,0.0	tripeptidases dna-directed	2	1	0.0
type) putative,2,1,0.0
proteins dtdp-glucose,2,1,0.0	proteins dtdp-glucose	2	1	0.0
enzymes zn-ribbon,2,1,0.0	enzymes zn-ribbon	2	1	0.0
acid-binding homoserine,2,1,0.0	acid-binding homoserine	2	1	0.0
trans-succinylase uncharacterized,2,1,0.0	trans-succinylase uncharacterized	2	1	0.0
transporter superfamily,2,1,0.0	transporter superfamily	2	1	0.0
helicases endonuclease,2,1,0.0	helicases endonuclease	2	1	0.0
iv uncharacterized,2,1,0.0
bacteria dtdp-d-glucose,2,1,0.0	bacteria dtdp-d-glucose	2	1	0.0
6-dehydratase glycyl-trna,2,1,0.0	6-dehydratase glycyl-trna	2	1	0.0
endonuclease penicillin,2,1,0.0	endonuclease penicillin	2	1	0.0
protein inorganic,2,1,0.0	protein inorganic	2	1	0.0
pyrophosphatase/exopolyphosphatase threonyl-trna,2,1,0.0	pyrophosphatase/exopolyphosphatase threonyl-trna	2	1	0.0
synthetase atpases,2,1,0.0	synthetase atpases	2	1	0.0
subunit uridine,2,1,0.0	subunit uridine	2	1	0.0
triphosphohydrolase predicted,2,1,0.0	triphosphohydrolase predicted	2	1	0.0
snrnp ribonuclease,2,1,0.0	snrnp ribonuclease	2	1	0.0
ribonuclease abc-type,2,1,0.0	ribonuclease abc-type	2	1	0.0
component lysophospholipase,2,1,0.0	component lysophospholipase	2	1	0.0
esterases uncharacterized,2,1,0.0	esterases uncharacterized	2	1	0.0
kinase gtpase,2,1,0.0	kinase gtpase	2	1	0.0
protein recombinational,2,1,0.0	protein recombinational	2	1	0.0
components parvulin-like,2,1,0.0	components parvulin-like	2	1	0.0
isomerase periplasmic,2,1,0.0	isomerase periplasmic	2	1	0.0
periplasmic glycine,2,1,0.0	periplasmic glycine	2	1	0.0
glycine betaine/choline-binding,2,1,0.0	glycine betaine/choline-binding	2	1	0.0
betaine/choline-binding (lipo)protein,2,1,0.0	betaine/choline-binding (lipo)protein	2	1	0.0
(lipo)protein abc-type,2,1,0.0	(lipo)protein abc-type	2	1	0.0
system (osmoprotectant,2,1,0.0	system (osmoprotectant	2	1	0.0
(osmoprotectant binding,2,1,0.0	(osmoprotectant binding	2	1	0.0
binding protein),2,1,0.0
protein) uncharacterized,2,1,0.0
peptidases uncharacterized,2,1,0.0	peptidases uncharacterized	2	1	0.0
superfamily dnaj-class,2,1,0.0	superfamily dnaj-class	2	1	0.0
dnaj-class molecular,2,1,0.0	dnaj-class molecular	2	1	0.0
chaperone c-terminal,2,1,0.0	chaperone c-terminal	2	1	0.0
c-terminal zn,2,1,0.0	c-terminal zn	2	1	0.0
zn finger,2,1,0.0	zn finger	2	1	0.0
finger domain,2,1,0.0	finger domain	2	1	0.0
domain nad-dependent,2,1,0.0	domain nad-dependent	2	1	0.0
ii) membrane,2,1,0.0	ii) membrane	2	1	0.0
lepa conserved,2,1,0.0	lepa conserved	2	1	0.0
family valyl-trna,2,1,0.0	family valyl-trna	2	1	0.0
enzyme aspartokinases,2,1,0.0	enzyme aspartokinases	2	1	0.0
aspartokinases fe2+/zn2+,2,1,0.0	aspartokinases fe2+/zn2+	2	1	0.0
proteins phosphate,2,1,0.0	proteins phosphate	2	1	0.0
phosphate starvation-inducible,2,1,0.0	phosphate starvation-inducible	2	1	0.0
starvation-inducible protein,2,1,0.0	starvation-inducible protein	2	1	0.0
protein phoh,2,1,0.0	protein phoh	2	1	0.0
phoh predicted,2,1,0.0	phoh predicted	2	1	0.0
atpase uncharacterized,2,1,0.0	atpase uncharacterized	2	1	0.0
bacteria transcriptional,2,1,0.0	bacteria transcriptional	2	1	0.0
regulator heat,2,1,0.0	regulator heat	2	1	0.0
shock gene,2,1,0.0	shock gene	2	1	0.0
gene predicted,2,1,0.0
hydrolase pyruvate-formate,2,1,0.0	hydrolase pyruvate-formate	2	1	0.0
pyruvate-formate lyase,2,1,0.0	pyruvate-formate lyase	2	1	0.0
lyase multimeric,2,1,0.0	lyase multimeric	2	1	0.0
wrba mismatch,2,1,0.0	wrba mismatch	2	1	0.0
repair atpase,2,1,0.0	repair atpase	2	1	0.0
atpase (muts,2,1,0.0	atpase (muts	2	1	0.0
(muts family),2,1,0.0	(muts family)	2	1	0.0
family) predicted,2,1,0.0
regulator nucleoside-diphosphate-sugar,2,1,0.0	regulator nucleoside-diphosphate-sugar	2	1	0.0
nucleoside-diphosphate-sugar epimerases,2,1,0.0	nucleoside-diphosphate-sugar epimerases	2	1	0.0
epimerases predicted,2,1,0.0	epimerases predicted	2	1	0.0
membrane metal-binding,2,1,0.0	membrane metal-binding	2	1	0.0
protein histone,2,1,0.0	protein histone	2	1	0.0
acetyltransferases 2-succinyl-6-hydroxy-2,2,1,0.0	acetyltransferases 2-succinyl-6-hydroxy-2	2	1	0.0
synthase superfamily,2,1,0.0	synthase superfamily	2	1	0.0
hydrolase hydroxymethylpyrimidine/phosphomethylpyrimidine,2,1,0.0	hydrolase hydroxymethylpyrimidine/phosphomethylpyrimidine	2	1	0.0
kinase predicted,2,1,0.0	kinase predicted	2	1	0.0
predicted nucleotide-utilizing,2,1,0.0	predicted nucleotide-utilizing	2	1	0.0
nucleotide-utilizing enzyme,2,1,0.0	nucleotide-utilizing enzyme	2	1	0.0
enzyme related,2,1,0.0
related molybdopterin-biosynthesis,2,1,0.0	related molybdopterin-biosynthesis	2	1	0.0
molybdopterin-biosynthesis enzyme,2,1,0.0	molybdopterin-biosynthesis enzyme	2	1	0.0
enzyme moea,2,1,0.0	enzyme moea	2	1	0.0
moea molecular,2,1,0.0	moea molecular	2	1	0.0
chaperone pyruvate/2-oxoglutarate,2,1,0.0	chaperone pyruvate/2-oxoglutarate	2	1	0.0
pyruvate/2-oxoglutarate dehydrogenase,2,1,0.0	pyruvate/2-oxoglutarate dehydrogenase	2	1	0.0
dehydrogenase complex,2,1,0.0	dehydrogenase complex	2	1	0.0
complex dihydrolipoamide,2,1,0.0	complex dihydrolipoamide	2	1	0.0
dihydrolipoamide dehydrogenase,2,1,0.0	dihydrolipoamide dehydrogenase	2	1	0.0
dehydrogenase (e3),2,1,0.0	dehydrogenase (e3)	2	1	0.0
(e3) component,2,1,0.0	(e3) component	2	1	0.0
enzymes l-alanine-dl-glutamate,2,1,0.0	enzymes l-alanine-dl-glutamate	2	1	0.0
hydrolase (metallo-beta-lactamase,2,1,0.0	hydrolase (metallo-beta-lactamase	2	1	0.0
(metallo-beta-lactamase superfamily),2,1,0.0	(metallo-beta-lactamase superfamily)	2	1	0.0
superfamily) adp-ribose,2,1,0.0	superfamily) adp-ribose	2	1	0.0
adp-ribose pyrophosphatase,2,1,0.0	adp-ribose pyrophosphatase	2	1	0.0
pyrophosphatase sh3,2,1,0.0	pyrophosphatase sh3	2	1	0.0
protein pyruvate-formate,2,1,0.0	protein pyruvate-formate	2	1	0.0
pyruvate-formate lyase-activating,2,1,0.0	pyruvate-formate lyase-activating	2	1	0.0
lyase-activating enzyme,2,1,0.0	lyase-activating enzyme	2	1	0.0
enzyme acetyl-coa,2,1,0.0	enzyme acetyl-coa	2	1	0.0
acetyl-coa acetyltransferase,2,1,0.0	acetyl-coa acetyltransferase	2	1	0.0
acetyltransferase molecular,2,1,0.0	acetyltransferase molecular	2	1	0.0
chaperone grpe,2,1,0.0	chaperone grpe	2	1	0.0
grpe (heat,2,1,0.0	grpe (heat	2	1	0.0
(heat shock,2,1,0.0	(heat shock	2	1	0.0
shock protein),2,1,0.0	shock protein)	2	1	0.0
protein) deoxycytidylate,2,1,0.0	protein) deoxycytidylate	2	1	0.0
deoxycytidylate deaminase,2,1,0.0	deoxycytidylate deaminase	2	1	0.0
deaminase permeases,2,1,0.0	deaminase permeases	2	1	0.0
superfamily sortase,2,1,0.0	superfamily sortase	2	1	0.0
sortase related,2,1,0.0	sortase related	2	1	0.0
related acyltransferases,2,1,0.0	related acyltransferases	2	1	0.0
acyltransferases glycerol-3-phosphate,2,1,0.0	acyltransferases glycerol-3-phosphate	2	1	0.0
glycerol-3-phosphate responsive,2,1,0.0	glycerol-3-phosphate responsive	2	1	0.0
responsive antiterminator,2,1,0.0	responsive antiterminator	2	1	0.0
antiterminator (mrna-binding),2,1,0.0	antiterminator (mrna-binding)	2	1	0.0
(mrna-binding) imidazolonepropionase,2,1,0.0	(mrna-binding) imidazolonepropionase	2	1	0.0
amidohydrolases abc-type,2,1,0.0	amidohydrolases abc-type	2	1	0.0
regulators transcriptional,2,1,0.0	regulators transcriptional	2	1	0.0
protein (competence-,2,1,0.0	protein (competence-	2	1	0.0
(competence- mitomycin-induced),2,1,0.0	(competence- mitomycin-induced)	2	1	0.0
mitomycin-induced) adenylate,2,1,0.0	mitomycin-induced) adenylate	2	1	0.0
adenylate kinase,2,1,0.0	adenylate kinase	2	1	0.0
kinase related,2,1,0.0	kinase related	2	1	0.0
related kinases,2,1,0.0	related kinases	2	1	0.0
kinases dna,2,1,0.0	kinases dna	2	1	0.0
dna uptake,2,1,0.0	dna uptake	2	1	0.0
uptake protein,2,1,0.0	uptake protein	2	1	0.0
protein related,2,1,0.0
related dna-binding,2,1,0.0	related dna-binding	2	1	0.0
dna-binding proteins,2,1,0.0	dna-binding proteins	2	1	0.0
proteins phosphatidylglycerophosphate,2,1,0.0	proteins phosphatidylglycerophosphate	2	1	0.0
phosphatidylglycerophosphate synthase,2,1,0.0	phosphatidylglycerophosphate synthase	2	1	0.0
synthase superoxide,2,1,0.0	synthase superoxide	2	1	0.0
dismutase atp-utilizing,2,1,0.0	dismutase atp-utilizing	2	1	0.0
components periplasmic,2,1,0.0	components periplasmic	2	1	0.0
protease dehydrogenases,2,1,0.0	protease dehydrogenases	2	1	0.0
dehydrogenases) uncharacterized,2,1,0.0	dehydrogenases) uncharacterized	2	1	0.0
bacteria ribosomal,2,1,0.0	bacteria ribosomal	2	1	0.0
protein l11,2,1,0.0	protein l11	2	1	0.0
l11 methylase,2,1,0.0	l11 methylase	2	1	0.0
methylase predicted,2,1,0.0	methylase predicted	2	1	0.0
predicted hd,2,1,0.0	predicted hd	2	1	0.0
hydrolase peroxiredoxin,2,1,0.0	hydrolase peroxiredoxin	2	1	0.0
peroxiredoxin predicted,2,1,0.0	peroxiredoxin predicted	2	1	0.0
regulators predicted,2,1,0.0	regulators predicted	2	1	0.0
superfamily) predicted,2,1,0.0
hydrolase metallo-beta-lactamase,2,1,0.0	hydrolase metallo-beta-lactamase	2	1	0.0
metallo-beta-lactamase superfamily,2,1,0.0	metallo-beta-lactamase superfamily	2	1	0.0
superfamily udp-n-acetylmuramate,2,1,0.0	superfamily udp-n-acetylmuramate	2	1	0.0
udp-n-acetylmuramate dehydrogenase,2,1,0.0	udp-n-acetylmuramate dehydrogenase	2	1	0.0
dehydrogenase abc-type,2,1,0.0	dehydrogenase abc-type	2	1	0.0
component diacylglycerol,2,1,0.0	component diacylglycerol	2	1	0.0
kinase ntp,2,1,0.0	kinase ntp	2	1	0.0
enzymes ribosomal,2,1,0.0	enzymes ribosomal	2	1	0.0
protein s20,2,1,0.0	protein s20	2	1	0.0
s20 3-methyladenine,2,1,0.0	s20 3-methyladenine	2	1	0.0
glycosylase na+/melibiose,2,1,0.0	glycosylase na+/melibiose	2	1	0.0
protein enzyme,2,1,0.0
enzyme involved,2,1,0.0
involved deoxyxylulose,2,1,0.0	involved deoxyxylulose	2	1	0.0
deoxyxylulose pathway,2,1,0.0	deoxyxylulose pathway	2	1	0.0
pathway isoprenoid,2,1,0.0	pathway isoprenoid	2	1	0.0
isoprenoid biosynthesis,2,1,0.0	isoprenoid biosynthesis	2	1	0.0
biosynthesis collagenase,2,1,0.0	biosynthesis collagenase	2	1	0.0
proteases ribosomal,2,1,0.0	proteases ribosomal	2	1	0.0
protein s21,2,1,0.0	protein s21	2	1	0.0
s21 atpase,2,1,0.0	s21 atpase	2	1	0.0
components abc,2,1,0.0	components abc	2	1	0.0
abc transporters,2,1,0.0	abc transporters	2	1	0.0
transporters duplicated,2,1,0.0	transporters duplicated	2	1	0.0
duplicated atpase,2,1,0.0	duplicated atpase	2	1	0.0
atpase domains,2,1,0.0	atpase domains	2	1	0.0
domains glycopeptide,2,1,0.0	domains glycopeptide	2	1	0.0
glycopeptide antibiotics,2,1,0.0	glycopeptide antibiotics	2	1	0.0
antibiotics resistance,2,1,0.0	antibiotics resistance	2	1	0.0
resistance protein,2,1,0.0	resistance protein	2	1	0.0
superfamily) cell,2,1,0.0
division protein,2,1,0.0	division protein	2	1	0.0
protein ftsi/penicillin-binding,2,1,0.0	protein ftsi/penicillin-binding	2	1	0.0
ftsi/penicillin-binding protein,2,1,0.0	ftsi/penicillin-binding protein	2	1	0.0
protein 2,2,1,0.0
2 predicted,2,1,0.0
predicted branched-chain,2,1,0.0	predicted branched-chain	2	1	0.0
acid permease,2,1,0.0	acid permease	2	1	0.0
permease (azaleucine,2,1,0.0	permease (azaleucine	2	1	0.0
(azaleucine resistance),2,1,0.0	(azaleucine resistance)	2	1	0.0
resistance) a/g-specific,2,1,0.0	resistance) a/g-specific	2	1	0.0
glycosylase predicted,2,1,0.0	glycosylase predicted	2	1	0.0
permease dihydrodipicolinate,2,1,0.0	permease dihydrodipicolinate	2	1	0.0
dihydrodipicolinate synthase/n-acetylneuraminate,2,1,0.0	dihydrodipicolinate synthase/n-acetylneuraminate	2	1	0.0
synthase/n-acetylneuraminate lyase,2,1,0.0	synthase/n-acetylneuraminate lyase	2	1	0.0
protein permeases,2,1,0.0	protein permeases	2	1	0.0
protein 3-hydroxy-3-methylglutaryl,2,1,0.0	protein 3-hydroxy-3-methylglutaryl	2	1	0.0
3-hydroxy-3-methylglutaryl coa,2,1,0.0	3-hydroxy-3-methylglutaryl coa	2	1	0.0
coa synthase,2,1,0.0	coa synthase	2	1	0.0
synthase mn2+,2,1,0.0	synthase mn2+	2	1	0.0
mn2+ fe2+,2,1,0.0	mn2+ fe2+	2	1	0.0
fe2+ transporters,2,1,0.0	fe2+ transporters	2	1	0.0
transporters nramp,2,1,0.0	transporters nramp	2	1	0.0
nramp family,2,1,0.0	nramp family	2	1	0.0
family reca/rada,2,1,0.0	family reca/rada	2	1	0.0
reca/rada recombinase,2,1,0.0	reca/rada recombinase	2	1	0.0
recombinase amino,2,1,0.0	recombinase amino	2	1	0.0
methylase coproporphyrinogen,2,1,0.0	methylase coproporphyrinogen	2	1	0.0
coproporphyrinogen iii,2,1,0.0	coproporphyrinogen iii	2	1	0.0
iii oxidase,2,1,0.0	iii oxidase	2	1	0.0
oxidase related,2,1,0.0	oxidase related	2	1	0.0
related fe-s,2,1,0.0	related fe-s	2	1	0.0
fe-s oxidoreductases,2,1,0.0	fe-s oxidoreductases	2	1	0.0
oxidoreductases uncharacterized,2,1,0.0	oxidoreductases uncharacterized	2	1	0.0
x) predicted,2,1,0.0
predicted membrane-associated,2,1,0.0	predicted membrane-associated	2	1	0.0
membrane-associated hd,2,1,0.0	membrane-associated hd	2	1	0.0
hydrolase aspartate-semialdehyde,2,1,0.0	hydrolase aspartate-semialdehyde	2	1	0.0
aspartate-semialdehyde dehydrogenase,2,1,0.0	aspartate-semialdehyde dehydrogenase	2	1	0.0
dehydrogenase dna,2,1,0.0	dehydrogenase dna	2	1	0.0
polymerase iii,2,1,0.0	polymerase iii	2	1	0.0
iii delta,2,1,0.0
subunit cytidine,2,1,0.0	subunit cytidine	2	1	0.0
cytidine deaminase,2,1,0.0	cytidine deaminase	2	1	0.0
deaminase predicted,2,1,0.0	deaminase predicted	2	1	0.0
predicted outer,2,1,0.0
superfamily fog,2,1,0.0	superfamily fog	2	1	0.0
repeat dna,2,1,0.0	repeat dna	2	1	0.0
dna mismatch,2,1,0.0	dna mismatch	2	1	0.0
enzyme (predicted,2,1,0.0
(predicted atpase),2,1,0.0	(predicted atpase)	2	1	0.0
atpase) uncharacterized,2,1,0.0	atpase) uncharacterized	2	1	0.0
tripeptidases dtdp-4-dehydrorhamnose,2,1,0.0	tripeptidases dtdp-4-dehydrorhamnose	2	1	0.0
enzymes dtdp-glucose,2,1,0.0	enzymes dtdp-glucose	2	1	0.0
pyrophosphorylase putative,2,1,0.0	pyrophosphorylase putative	2	1	0.0
proteins dtdp-d-glucose,2,1,0.0	proteins dtdp-d-glucose	2	1	0.0
6-dehydratase predicted,2,1,0.0	6-dehydratase predicted	2	1	0.0
endonuclease dna-directed,2,1,0.0	endonuclease dna-directed	2	1	0.0
(sigma70/sigma32) homoserine,2,1,0.0	(sigma70/sigma32) homoserine	2	1	0.0
trans-succinylase superfamily,2,1,0.0	trans-succinylase superfamily	2	1	0.0
helicases dna,2,1,0.0	helicases dna	2	1	0.0
type) endonuclease,2,1,0.0	type) endonuclease	2	1	0.0
iv atpases,2,1,0.0	iv atpases	2	1	0.0
transporter uncharacterized,2,1,0.0	transporter uncharacterized	2	1	0.0
bacteria cytochrome,2,1,0.0	bacteria cytochrome	2	1	0.0
subunit inorganic,2,1,0.0	subunit inorganic	2	1	0.0
pyrophosphatase/exopolyphosphatase lysophospholipase,2,1,0.0	pyrophosphatase/exopolyphosphatase lysophospholipase	2	1	0.0
esterases abc-type,2,1,0.0	esterases abc-type	2	1	0.0
component aldo/keto,2,1,0.0	component aldo/keto	2	1	0.0
aldo/keto reductases,2,1,0.0	aldo/keto reductases	2	1	0.0
reductases related,2,1,0.0	reductases related	2	1	0.0
related diketogulonate,2,1,0.0	related diketogulonate	2	1	0.0
diketogulonate reductase,2,1,0.0	diketogulonate reductase	2	1	0.0
reductase parvulin-like,2,1,0.0	reductase parvulin-like	2	1	0.0
isomerase penicillin,2,1,0.0	isomerase penicillin	2	1	0.0
protein ntp,2,1,0.0	protein ntp	2	1	0.0
enzymes abc-type,2,1,0.0	enzymes abc-type	2	1	0.0
components d-mannonate,2,1,0.0	components d-mannonate	2	1	0.0
dehydratase conserved,2,1,0.0	dehydratase conserved	2	1	0.0
protein fe2+/zn2+,2,1,0.0	protein fe2+/zn2+	2	1	0.0
proteins transcriptional,2,1,0.0	proteins transcriptional	2	1	0.0
regulators dehydrogenases,2,1,0.0	regulators dehydrogenases	2	1	0.0
dehydrogenases) predicted,2,1,0.0	dehydrogenases) predicted	2	1	0.0
superfamily) 2-succinyl-6-hydroxy-2,2,1,0.0	superfamily) 2-succinyl-6-hydroxy-2	2	1	0.0
bacteria hydroxymethylpyrimidine/phosphomethylpyrimidine,2,1,0.0	bacteria hydroxymethylpyrimidine/phosphomethylpyrimidine	2	1	0.0
kinase membrane,2,1,0.0	kinase membrane	2	1	0.0
required beta-lactamase,2,1,0.0	required beta-lactamase	2	1	0.0
beta-lactamase induction,2,1,0.0	beta-lactamase induction	2	1	0.0
induction uncharacterized,2,1,0.0	induction uncharacterized	2	1	0.0
superfamily l-alanine-dl-glutamate,2,1,0.0	superfamily l-alanine-dl-glutamate	2	1	0.0
superfamily membrane,2,1,0.0	superfamily membrane	2	1	0.0
lepa ferredoxin,2,1,0.0	lepa ferredoxin	2	1	0.0
ferredoxin predicted,2,1,0.0	ferredoxin predicted	2	1	0.0
protein amino,2,1,0.0	protein amino	2	1	0.0
4-epimerase glycosyltransferases,2,1,0.0	4-epimerase glycosyltransferases	2	1	0.0
biogenesis serine/threonine,2,1,0.0	biogenesis serine/threonine	2	1	0.0
fog cbs,2,1,0.0	fog cbs	2	1	0.0
cbs domain,2,1,0.0	cbs domain	2	1	0.0
domain periplasmic,2,1,0.0	domain periplasmic	2	1	0.0
protease fog,2,1,0.0	protease fog	2	1	0.0
repeat peroxiredoxin,2,1,0.0	repeat peroxiredoxin	2	1	0.0
peroxiredoxin uncharacterized,2,1,0.0	peroxiredoxin uncharacterized	2	1	0.0
acid-binding dna-directed,2,1,0.0	acid-binding dna-directed	2	1	0.0
type) predicted,2,1,0.0
kinase threonyl-trna,2,1,0.0	kinase threonyl-trna	2	1	0.0
synthetase nad-dependent,2,1,0.0	synthetase nad-dependent	2	1	0.0
ii) uridine,2,1,0.0	ii) uridine	2	1	0.0
triphosphohydrolase uncharacterized,2,1,0.0	triphosphohydrolase uncharacterized	2	1	0.0
protein ribonuclease,2,1,0.0	protein ribonuclease	2	1	0.0
ribonuclease predicted,2,1,0.0	ribonuclease predicted	2	1	0.0
snrnp multimeric,2,1,0.0	snrnp multimeric	2	1	0.0
wrba valyl-trna,2,1,0.0	wrba valyl-trna	2	1	0.0
synthetase 3-methyladenine,2,1,0.0	synthetase 3-methyladenine	2	1	0.0
glycosylase abc-type,2,1,0.0	glycosylase abc-type	2	1	0.0
components collagenase,2,1,0.0	components collagenase	2	1	0.0
proteases transcriptional,2,1,0.0	proteases transcriptional	2	1	0.0
components arylsulfatase,2,1,0.0	components arylsulfatase	2	1	0.0
arylsulfatase regulator,2,1,0.0	arylsulfatase regulator	2	1	0.0
regulator (fe-s,2,1,0.0	regulator (fe-s	2	1	0.0
(fe-s oxidoreductase),2,1,0.0	(fe-s oxidoreductase)	2	1	0.0
oxidoreductase) predicted,2,1,0.0	oxidoreductase) predicted	2	1	0.0
superfamily) histone,2,1,0.0	superfamily) histone	2	1	0.0
acetyltransferases abc-type,2,1,0.0	acetyltransferases abc-type	2	1	0.0
component enterochelin,2,1,0.0	component enterochelin	2	1	0.0
enterochelin esterase,2,1,0.0	enterochelin esterase	2	1	0.0
esterase related,2,1,0.0	esterase related	2	1	0.0
enzymes na+/melibiose,2,1,0.0	enzymes na+/melibiose	2	1	0.0
methylase uncharacterized,2,1,0.0	methylase uncharacterized	2	1	0.0
x) imidazolonepropionase,2,1,0.0	x) imidazolonepropionase	2	1	0.0
amidohydrolases regulator,2,1,0.0	amidohydrolases regulator	2	1	0.0
regulator cell,2,1,0.0	regulator cell	2	1	0.0
cell morphogenesis,2,1,0.0	cell morphogenesis	2	1	0.0
morphogenesis signaling,2,1,0.0	morphogenesis signaling	2	1	0.0
signaling predicted,2,1,0.0	signaling predicted	2	1	0.0
superfamily) sh3,2,1,0.0	superfamily) sh3	2	1	0.0
protein atp-utilizing,2,1,0.0	protein atp-utilizing	2	1	0.0
superfamily a/g-specific,2,1,0.0	superfamily a/g-specific	2	1	0.0
glycosylase preprotein,2,1,0.0	glycosylase preprotein	2	1	0.0
preprotein translocase,2,1,0.0	preprotein translocase	2	1	0.0
translocase subunit,2,1,0.0	translocase subunit	2	1	0.0
subunit secg,2,1,0.0	subunit secg	2	1	0.0
secg predicted,2,1,0.0	secg predicted	2	1	0.0
methyltransferase uncharacterized,2,1,0.0	methyltransferase uncharacterized	2	1	0.0
hydrolase cobyrinic,2,1,0.0	hydrolase cobyrinic	2	1	0.0
cobyrinic acid,2,1,0.0	cobyrinic acid	2	1	0.0
acid c-diamide,2,1,0.0	acid c-diamide	2	1	0.0
c-diamide synthase,2,1,0.0	c-diamide synthase	2	1	0.0
(sigma70/sigma32) protein,2,1,0.0	(sigma70/sigma32) protein	2	1	0.0
protein involved,2,1,0.0
involved propanediol,2,1,0.0	involved propanediol	2	1	0.0
propanediol utilization,2,1,0.0	propanediol utilization	2	1	0.0
utilization related,2,1,0.0
proteins (includes,2,1,0.0
(includes coumermycin,2,1,0.0	(includes coumermycin	2	1	0.0
coumermycin biosynthetic,2,1,0.0	coumermycin biosynthetic	2	1	0.0
biosynthetic protein),2,1,0.0	biosynthetic protein)	2	1	0.0
protein) kinase,2,1,0.0	protein) kinase	2	1	0.0
kinase thiamine,2,1,0.0	kinase thiamine	2	1	0.0
synthase acetyltransferase,2,1,0.0	synthase acetyltransferase	2	1	0.0
superfamily) histidinol-phosphate/aromatic,2,1,0.0	superfamily) histidinol-phosphate/aromatic	2	1	0.0
decarboxylase fructose-2,2,1,0.0	decarboxylase fructose-2	2	1	0.0
6-bisphosphatase uncharacterized,2,1,0.0	6-bisphosphatase uncharacterized	2	1	0.0
(sigma70/sigma32) dna-directed,2,1,0.0	(sigma70/sigma32) dna-directed	2	1	0.0
polymerase specialized,2,1,0.0	polymerase specialized	2	1	0.0
specialized sigma,2,1,0.0
subunit parvulin-like,2,1,0.0	subunit parvulin-like	2	1	0.0
isomerase dna,2,1,0.0	isomerase dna	2	1	0.0
type) uncharacterized,2,1,0.0
protein branched-chain,2,1,0.0	protein branched-chain	2	1	0.0
lyase leucyl,2,1,0.0	lyase leucyl	2	1	0.0
leucyl aminopeptidase,2,1,0.0	leucyl aminopeptidase	2	1	0.0
aminopeptidase (aminopeptidase,2,1,0.0	aminopeptidase (aminopeptidase	2	1	0.0
(aminopeptidase t),2,1,0.0	(aminopeptidase t)	2	1	0.0
t) anthranilate/para-aminobenzoate,2,1,0.0	t) anthranilate/para-aminobenzoate	2	1	0.0
component fog,2,1,0.0	component fog	2	1	0.0
fog fha,2,1,0.0	fog fha	2	1	0.0
fha domain,2,1,0.0	fha domain	2	1	0.0
domain fog,2,1,0.0	domain fog	2	1	0.0
fog heat,2,1,0.0	fog heat	2	1	0.0
heat repeat,2,1,0.0	heat repeat	2	1	0.0
predicted dehydrogenases,2,1,0.0	predicted dehydrogenases	2	1	0.0
dehydrogenases related,2,1,0.0	dehydrogenases related	2	1	0.0
proteins 7,2,1,0.0
acid-binding formamidopyrimidine-dna,2,1,0.0	acid-binding formamidopyrimidine-dna	2	1	0.0
glycosylase 3-deoxy-d-manno-octulosonic-acid,2,1,0.0	glycosylase 3-deoxy-d-manno-octulosonic-acid	2	1	0.0
transferase pseudouridylate,2,1,0.0	transferase pseudouridylate	2	1	0.0
rna-specific glycyl-trna,2,1,0.0	rna-specific glycyl-trna	2	1	0.0
subunit glycerol-3-phosphate,2,1,0.0	subunit glycerol-3-phosphate	2	1	0.0
nitroreductase prolipoprotein,2,1,0.0	nitroreductase prolipoprotein	2	1	0.0
diacylglyceryltransferase deoxyribodipyrimidine,2,1,0.0	diacylglyceryltransferase deoxyribodipyrimidine	2	1	0.0
protein collagenase,2,1,0.0	protein collagenase	2	1	0.0
proteases predicted,2,1,0.0	proteases predicted	2	1	0.0
protein phosphoribosylcarboxyaminoimidazole,2,1,0.0	protein phosphoribosylcarboxyaminoimidazole	2	1	0.0
domain) predicted,2,1,0.0
superfamily sam-dependent,2,1,0.0	superfamily sam-dependent	2	1	0.0
methyltransferases signal,2,1,0.0	methyltransferases signal	2	1	0.0
trna-(guanine-n1)-methyltransferase abc-type,2,1,0.0	trna-(guanine-n1)-methyltransferase abc-type	2	1	0.0
transferase ribosomal,2,1,0.0	transferase ribosomal	2	1	0.0
s16 rimm,2,1,0.0	s16 rimm	2	1	0.0
processing abc-type,2,1,0.0	processing abc-type	2	1	0.0
(dynamin-related) anti-anti-sigma,2,1,0.0	(dynamin-related) anti-anti-sigma	2	1	0.0
factor) homoserine,2,1,0.0	factor) homoserine	2	1	0.0
trans-succinylase o-acetylhomoserine,2,1,0.0	trans-succinylase o-acetylhomoserine	2	1	0.0
sulfhydrylase pyridoxal,2,1,0.0	sulfhydrylase pyridoxal	2	1	0.0
protein zn-dependent,2,1,0.0	protein zn-dependent	2	1	0.0
glyoxylases outer,2,1,0.0	glyoxylases outer	2	1	0.0
lipoprotein acyl,2,1,0.0	lipoprotein acyl	2	1	0.0
protein glutathione,2,1,0.0	protein glutathione	2	1	0.0
s-transferase 2c-methyl-d-erythritol,2,1,0.0	s-transferase 2c-methyl-d-erythritol	2	1	0.0
synthase cytochrome,2,1,0.0	synthase cytochrome	2	1	0.0
c1 amino,2,1,0.0	c1 amino	2	1	0.0
ligase high-affinity,2,1,0.0	ligase high-affinity	2	1	0.0
chain osmosensitive,2,1,0.0	chain osmosensitive	2	1	0.0
kinase integrase,2,1,0.0	kinase integrase	2	1	0.0
integrase phosphomannomutase,2,1,0.0	integrase phosphomannomutase	2	1	0.0
phosphomannomutase abc-type,2,1,0.0	phosphomannomutase abc-type	2	1	0.0
s9 arginine/lysine/ornithine,2,1,0.0	s9 arginine/lysine/ornithine	2	1	0.0
decarboxylases phosphopantothenoylcysteine,2,1,0.0	decarboxylases phosphopantothenoylcysteine	2	1	0.0
synthetase/decarboxylase response,2,1,0.0	synthetase/decarboxylase response	2	1	0.0
domain acetylglutamate,2,1,0.0	domain acetylglutamate	2	1	0.0
acetylglutamate kinase,2,1,0.0	acetylglutamate kinase	2	1	0.0
chain superfamily,2,1,0.0
helicases dutpase,2,1,0.0	helicases dutpase	2	1	0.0
dutpase histidinol-phosphate/aromatic,2,1,0.0	dutpase histidinol-phosphate/aromatic	2	1	0.0
decarboxylase transcriptional,2,1,0.0	decarboxylase transcriptional	2	1	0.0
regulator stress-induced,2,1,0.0	regulator stress-induced	2	1	0.0
unknown) lactate,2,1,0.0	unknown) lactate	2	1	0.0
lactate dehydrogenase,2,1,0.0	lactate dehydrogenase	2	1	0.0
related dehydrogenases,2,1,0.0	related dehydrogenases	2	1	0.0
dehydrogenases dipeptide/tripeptide,2,1,0.0	dehydrogenases dipeptide/tripeptide	2	1	0.0
permease glutamyl-,2,1,0.0	permease glutamyl-	2	1	0.0
synthetases phosphotransferase,2,1,0.0	synthetases phosphotransferase	2	1	0.0
proteins protein,2,1,0.0
recombination histidinol,2,1,0.0	recombination histidinol	2	1	0.0
dehydrogenase permeases,2,1,0.0	dehydrogenase permeases	2	1	0.0
domain) phosphoenolpyruvate-protein,2,1,0.0	domain) phosphoenolpyruvate-protein	2	1	0.0
bacteria) predicted,2,1,0.0
regulator hypoxanthine-guanine,2,1,0.0	regulator hypoxanthine-guanine	2	1	0.0
phosphoribosyltransferase 4-diphosphocytidyl-2-methyl-d-erithritol,2,1,0.0	phosphoribosyltransferase 4-diphosphocytidyl-2-methyl-d-erithritol	2	1	0.0
synthase abc-type,2,1,0.0	synthase abc-type	2	1	0.0
component cysteinyl-trna,2,1,0.0	component cysteinyl-trna	2	1	0.0
synthetase stringent,2,1,0.0	synthetase stringent	2	1	0.0
protein response,2,1,0.0	protein response	2	1	0.0
domain atp,2,1,0.0	domain atp	2	1	0.0
phosphoribosyltransferase low-affinity,2,1,0.0	phosphoribosyltransferase low-affinity	2	1	0.0
phosphodiesterase glutaredoxin,2,1,0.0	phosphodiesterase glutaredoxin	2	1	0.0
proteins k+-transporting,2,1,0.0	proteins k+-transporting	2	1	0.0
chain uncharacterized,2,1,0.0
protein pyridoxal,2,1,0.0	protein pyridoxal	2	1	0.0
c1 permeases,2,1,0.0	c1 permeases	2	1	0.0
superfamily glutathione,2,1,0.0	superfamily glutathione	2	1	0.0
s-transferase cytochrome,2,1,0.0	s-transferase cytochrome	2	1	0.0
s9 zn-dependent,2,1,0.0	s9 zn-dependent	2	1	0.0
glyoxylases 2-keto-4-pentenoate,2,1,0.0	glyoxylases 2-keto-4-pentenoate	2	1	0.0
2-keto-4-pentenoate hydratase/2-oxohepta-3-ene-1,2,1,0.0	2-keto-4-pentenoate hydratase/2-oxohepta-3-ene-1	2	1	0.0
hydratase/2-oxohepta-3-ene-1 7-dioic,2,1,0.0	hydratase/2-oxohepta-3-ene-1 7-dioic	2	1	0.0
7-dioic acid,2,1,0.0	7-dioic acid	2	1	0.0
acid hydratase,2,1,0.0	acid hydratase	2	1	0.0
hydratase (catechol,2,1,0.0	hydratase (catechol	2	1	0.0
(catechol pathway),2,1,0.0	(catechol pathway)	2	1	0.0
pathway) uncharacterized,2,1,0.0
ligase transcriptional,2,1,0.0	ligase transcriptional	2	1	0.0
regulator stringent,2,1,0.0	regulator stringent	2	1	0.0
protein transposase,2,1,0.0	protein transposase	2	1	0.0
transposase inactivated,2,1,0.0	transposase inactivated	2	1	0.0
inactivated derivatives,2,1,0.0	inactivated derivatives	2	1	0.0
derivatives is5,2,1,0.0	derivatives is5	2	1	0.0
is5 family,2,1,0.0	is5 family	2	1	0.0
family response,2,1,0.0
domain ribosome-associated,2,1,0.0	domain ribosome-associated	2	1	0.0
ribosome-associated heat,2,1,0.0	ribosome-associated heat	2	1	0.0
shock protein,2,1,0.0	shock protein	2	1	0.0
protein implicated,2,1,0.0
implicated recycling,2,1,0.0	implicated recycling	2	1	0.0
recycling 50s,2,1,0.0	recycling 50s	2	1	0.0
50s subunit,2,1,0.0	50s subunit	2	1	0.0
subunit (s4,2,1,0.0	subunit (s4	2	1	0.0
(s4 paralog),2,1,0.0	(s4 paralog)	2	1	0.0
paralog) phosphoenolpyruvate-protein,2,1,0.0	paralog) phosphoenolpyruvate-protein	2	1	0.0
bacteria) hypoxanthine-guanine,2,1,0.0	bacteria) hypoxanthine-guanine	2	1	0.0
phosphoribosyltransferase uncharacterized,2,1,0.0	phosphoribosyltransferase uncharacterized	2	1	0.0
bacteria nicotinate-nucleotide,2,1,0.0	bacteria nicotinate-nucleotide	2	1	0.0
nicotinate-nucleotide pyrophosphorylase,2,1,0.0	nicotinate-nucleotide pyrophosphorylase	2	1	0.0
pyrophosphorylase cell,2,1,0.0	pyrophosphorylase cell	2	1	0.0
cell shape-determining,2,1,0.0	cell shape-determining	2	1	0.0
shape-determining protein,2,1,0.0	shape-determining protein	2	1	0.0
protein phosphoenolpyruvate,2,1,0.0	protein phosphoenolpyruvate	2	1	0.0
phosphoenolpyruvate carboxylase,2,1,0.0	phosphoenolpyruvate carboxylase	2	1	0.0
carboxylase phosphotransferase,2,1,0.0	carboxylase phosphotransferase	2	1	0.0
proteins glycerol-3-phosphate,2,1,0.0	proteins glycerol-3-phosphate	2	1	0.0
dehydrogenase membrane-bound,2,1,0.0	dehydrogenase membrane-bound	2	1	0.0
membrane-bound lytic,2,1,0.0	membrane-bound lytic	2	1	0.0
lytic murein,2,1,0.0	lytic murein	2	1	0.0
murein transglycosylase,2,1,0.0	murein transglycosylase	2	1	0.0
transglycosylase uncharacterized,2,1,0.0	transglycosylase uncharacterized	2	1	0.0
acid-binding 2c-methyl-d-erythritol,2,1,0.0	acid-binding 2c-methyl-d-erythritol	2	1	0.0
synthase 4-diphosphocytidyl-2-methyl-d-erithritol,2,1,0.0	synthase 4-diphosphocytidyl-2-methyl-d-erithritol	2	1	0.0
synthase ribonuclease,2,1,0.0	synthase ribonuclease	2	1	0.0
ribonuclease glutamyl-,2,1,0.0	ribonuclease glutamyl-	2	1	0.0
synthetases fog,2,1,0.0	synthetases fog	2	1	0.0
repeat cysteinyl-trna,2,1,0.0	repeat cysteinyl-trna	2	1	0.0
synthetase uncharacterized,2,1,0.0	synthetase uncharacterized	2	1	0.0
acid-binding 3-deoxy-d-manno-octulosonic-acid,2,1,0.0	acid-binding 3-deoxy-d-manno-octulosonic-acid	2	1	0.0
transferase glycyl-trna,2,1,0.0	transferase glycyl-trna	2	1	0.0
subunit pseudouridylate,2,1,0.0	subunit pseudouridylate	2	1	0.0
rna-specific prolipoprotein,2,1,0.0	rna-specific prolipoprotein	2	1	0.0
diacylglyceryltransferase glycerol-3-phosphate,2,1,0.0	diacylglyceryltransferase glycerol-3-phosphate	2	1	0.0
nitroreductase collagenase,2,1,0.0	nitroreductase collagenase	2	1	0.0
proteases phosphoribosylcarboxyaminoimidazole,2,1,0.0	proteases phosphoribosylcarboxyaminoimidazole	2	1	0.0
atpases signal,2,1,0.0	atpases signal	2	1	0.0
s16 predicted,2,1,0.0	s16 predicted	2	1	0.0
domain) ribosomal,2,1,0.0	domain) ribosomal	2	1	0.0
trna-(guanine-n1)-methyltransferase rimm,2,1,0.0	trna-(guanine-n1)-methyltransferase rimm	2	1	0.0
processing predicted,2,1,0.0	processing predicted	2	1	0.0
(dynamin-related) glutaredoxin,2,1,0.0	(dynamin-related) glutaredoxin	2	1	0.0
proteins homoserine,2,1,0.0	proteins homoserine	2	1	0.0
trans-succinylase fog,2,1,0.0	trans-succinylase fog	2	1	0.0
repeat o-acetylhomoserine,2,1,0.0	repeat o-acetylhomoserine	2	1	0.0
sulfhydrylase uncharacterized,2,1,0.0	sulfhydrylase uncharacterized	2	1	0.0
helicases acyl,2,1,0.0	helicases acyl	2	1	0.0
protein membrane,2,1,0.0	protein membrane	2	1	0.0
metalloendopeptidases pseudouridine,2,1,0.0	metalloendopeptidases pseudouridine	2	1	0.0
pseudouridine synthase,2,1,0.0	pseudouridine synthase	2	1	0.0
bacteria carbon,2,1,0.0	bacteria carbon	2	1	0.0
carbon storage,2,1,0.0	carbon storage	2	1	0.0
storage regulator,2,1,0.0	storage regulator	2	1	0.0
regulator (could,2,1,0.0	regulator (could	2	1	0.0
(could regulate,2,1,0.0	(could regulate	2	1	0.0
regulate swarming,2,1,0.0	regulate swarming	2	1	0.0
swarming quorum,2,1,0.0	swarming quorum	2	1	0.0
quorum sensing),2,1,0.0	quorum sensing)	2	1	0.0
sensing) 4-diphosphocytidyl-2c-methyl-d-erythritol,2,1,0.0	sensing) 4-diphosphocytidyl-2c-methyl-d-erythritol	2	1	0.0
4-diphosphocytidyl-2c-methyl-d-erythritol 2-phosphate,2,1,0.0	4-diphosphocytidyl-2c-methyl-d-erythritol 2-phosphate	2	1	0.0
2-phosphate synthase,2,1,0.0	2-phosphate synthase	2	1	0.0
synthase tmrna-binding,2,1,0.0	synthase tmrna-binding	2	1	0.0
tmrna-binding protein,2,1,0.0	tmrna-binding protein	2	1	0.0
protein 3-deoxy-d-arabino-heptulosonate,2,1,0.0	protein 3-deoxy-d-arabino-heptulosonate	2	1	0.0
3-deoxy-d-arabino-heptulosonate 7-phosphate,2,1,0.0	3-deoxy-d-arabino-heptulosonate 7-phosphate	2	1	0.0
7-phosphate (dahp),2,1,0.0	7-phosphate (dahp)	2	1	0.0
(dahp) synthase,2,1,0.0	(dahp) synthase	2	1	0.0
synthase outer,2,1,0.0	synthase outer	2	1	0.0
uncharacterized homolog,2,1,0.0
homolog plant,2,1,0.0
plant iojap,2,1,0.0	plant iojap	2	1	0.0
iojap protein,2,1,0.0	iojap protein	2	1	0.0
putative silver,2,1,0.0	putative silver	2	1	0.0
silver efflux,2,1,0.0	silver efflux	2	1	0.0
efflux pump,2,1,0.0	efflux pump	2	1	0.0
pump nicotinic,2,1,0.0	pump nicotinic	2	1	0.0
nicotinic acid,2,1,0.0	nicotinic acid	2	1	0.0
acid mononucleotide,2,1,0.0	acid mononucleotide	2	1	0.0
mononucleotide adenylyltransferase,2,1,0.0	mononucleotide adenylyltransferase	2	1	0.0
adenylyltransferase fog,2,1,0.0	adenylyltransferase fog	2	1	0.0
fog ankyrin,2,1,0.0	fog ankyrin	2	1	0.0
ankyrin repeat,2,1,0.0	ankyrin repeat	2	1	0.0
regulators copg/arc/metj,2,1,0.0	regulators copg/arc/metj	2	1	0.0
copg/arc/metj dna-binding,2,1,0.0	copg/arc/metj dna-binding	2	1	0.0
domain metal-binding,2,1,0.0	domain metal-binding	2	1	0.0
metal-binding domain,2,1,0.0	metal-binding domain	2	1	0.0
domain arsenate,2,1,0.0	domain arsenate	2	1	0.0
arsenate reductase,2,1,0.0	arsenate reductase	2	1	0.0
reductase related,2,1,0.0	reductase related	2	1	0.0
proteins glutaredoxin,2,1,0.0	proteins glutaredoxin	2	1	0.0
glutaredoxin family,2,1,0.0	glutaredoxin family	2	1	0.0
family uncharacterized,2,1,0.0
bacteria protein,2,1,0.0
recombination trna,2,1,0.0	recombination trna	2	1	0.0
trna delta(2)-isopentenylpyrophosphate,2,1,0.0	trna delta(2)-isopentenylpyrophosphate	2	1	0.0
delta(2)-isopentenylpyrophosphate transferase,2,1,0.0	delta(2)-isopentenylpyrophosphate transferase	2	1	0.0
protein double-stranded,2,1,0.0	protein double-stranded	2	1	0.0
double-stranded beta-helix,2,1,0.0	double-stranded beta-helix	2	1	0.0
beta-helix domain,2,1,0.0	beta-helix domain	2	1	0.0
domain membrane-fusion,2,1,0.0	domain membrane-fusion	2	1	0.0
membrane-fusion protein,2,1,0.0	membrane-fusion protein	2	1	0.0
protein flagellar,2,1,0.0	protein flagellar	2	1	0.0
flagellar basal-body,2,1,0.0	flagellar basal-body	2	1	0.0
basal-body p-ring,2,1,0.0	basal-body p-ring	2	1	0.0
p-ring protein,2,1,0.0	p-ring protein	2	1	0.0
protein glycyl-trna,2,1,0.0	protein glycyl-trna	2	1	0.0
predicted endonuclease,2,1,0.0	predicted endonuclease	2	1	0.0
endonuclease uri,2,1,0.0	endonuclease uri	2	1	0.0
uri domain,2,1,0.0	uri domain	2	1	0.0
domain uncharacterized,2,1,0.0
protein formamidopyrimidine-dna,2,1,0.0	protein formamidopyrimidine-dna	2	1	0.0
glycosylase deoxyribodipyrimidine,2,1,0.0	glycosylase deoxyribodipyrimidine	2	1	0.0
protein sam-dependent,2,1,0.0	protein sam-dependent	2	1	0.0
methyltransferases low-affinity,2,1,0.0	methyltransferases low-affinity	2	1	0.0
phosphodiesterase abc-type,2,1,0.0	phosphodiesterase abc-type	2	1	0.0
superfamily outer,2,1,0.0
lipoprotein predicted,2,1,0.0	lipoprotein predicted	2	1	0.0
domain) response,2,1,0.0
domain osmosensitive,2,1,0.0	domain osmosensitive	2	1	0.0
predicted nad/fad-dependent,2,1,0.0	predicted nad/fad-dependent	2	1	0.0
nad/fad-dependent oxidoreductase,2,1,0.0	nad/fad-dependent oxidoreductase	2	1	0.0
oxidoreductase phosphoglucomutase,2,1,0.0	oxidoreductase phosphoglucomutase	2	1	0.0
phosphoglucomutase integrase,2,1,0.0	phosphoglucomutase integrase	2	1	0.0
integrase dipeptide/tripeptide,2,1,0.0	integrase dipeptide/tripeptide	2	1	0.0
permease membrane,2,1,0.0	permease membrane	2	1	0.0
membrane protease,2,1,0.0	membrane protease	2	1	0.0
protease subunits,2,1,0.0	protease subunits	2	1	0.0
subunits stomatin/prohibitin,2,1,0.0	subunits stomatin/prohibitin	2	1	0.0
stomatin/prohibitin homologs,2,1,0.0	stomatin/prohibitin homologs	2	1	0.0
homologs predicted,2,1,0.0
predicted glycosyltransferases,2,1,0.0	predicted glycosyltransferases	2	1	0.0
glycosyltransferases high-affinity,2,1,0.0	glycosyltransferases high-affinity	2	1	0.0
chain atp,2,1,0.0	chain atp	2	1	0.0
phosphoribosyltransferase k+-transporting,2,1,0.0	phosphoribosyltransferase k+-transporting	2	1	0.0
superfamily) arginine/lysine/ornithine,2,1,0.0	superfamily) arginine/lysine/ornithine	2	1	0.0
decarboxylases sphingosine,2,1,0.0	decarboxylases sphingosine	2	1	0.0
sphingosine kinase,2,1,0.0	sphingosine kinase	2	1	0.0
kinase enzymes,2,1,0.0	kinase enzymes	2	1	0.0
enzymes related,2,1,0.0
related eukaryotic,2,1,0.0
eukaryotic diacylglycerol,2,1,0.0	eukaryotic diacylglycerol	2	1	0.0
kinase signal,2,1,0.0	kinase signal	2	1	0.0
signal transduction,2,1,0.0	signal transduction	2	1	0.0
transduction histidine,2,1,0.0	transduction histidine	2	1	0.0
kinase superfamily,2,1,0.0	kinase superfamily	2	1	0.0
helicases anti-anti-sigma,2,1,0.0	helicases anti-anti-sigma	2	1	0.0
factor) histidinol-phosphate/aromatic,2,1,0.0	factor) histidinol-phosphate/aromatic	2	1	0.0
decarboxylase trna,2,1,0.0	decarboxylase trna	2	1	0.0
trna nucleotidyltransferase/poly(a),2,1,0.0	trna nucleotidyltransferase/poly(a)	2	1	0.0
nucleotidyltransferase/poly(a) polymerase,2,1,0.0	nucleotidyltransferase/poly(a) polymerase	2	1	0.0
polymerase abc-type,2,1,0.0	polymerase abc-type	2	1	0.0
phosphate export,2,1,0.0	phosphate export	2	1	0.0
export systems,2,1,0.0	export systems	2	1	0.0
component stress-induced,2,1,0.0	component stress-induced	2	1	0.0
unknown) 3-hydroxyisobutyrate,2,1,0.0	unknown) 3-hydroxyisobutyrate	2	1	0.0
3-hydroxyisobutyrate dehydrogenase,2,1,0.0	3-hydroxyisobutyrate dehydrogenase	2	1	0.0
related beta-hydroxyacid,2,1,0.0	related beta-hydroxyacid	2	1	0.0
beta-hydroxyacid dehydrogenases,2,1,0.0	beta-hydroxyacid dehydrogenases	2	1	0.0
dehydrogenases sh3,2,1,0.0	dehydrogenases sh3	2	1	0.0
uncharacterized membrane,2,1,0.0	uncharacterized membrane	2	1	0.0
putative virulence,2,1,0.0	putative virulence	2	1	0.0
virulence factor,2,1,0.0	virulence factor	2	1	0.0
factor outer,2,1,0.0
glycosyltransferase histidinol,2,1,0.0	glycosyltransferase histidinol	2	1	0.0
hydrolase alpha/beta,2,1,0.0	hydrolase alpha/beta	2	1	0.0
superfamily amino,2,1,0.0
transporters predicted,2,1,0.0	transporters predicted	2	1	0.0
protein 5,2,1,0.0
5 10-methylenetetrahydrofolate,2,1,0.0	5 10-methylenetetrahydrofolate	2	1	0.0
10-methylenetetrahydrofolate reductase,2,1,0.0	10-methylenetetrahydrofolate reductase	2	1	0.0
reductase abc-type,2,1,0.0	reductase abc-type	2	1	0.0
component glycosyltransferases,2,1,0.0	component glycosyltransferases	2	1	0.0
biogenesis udp-galactopyranose,2,1,0.0	biogenesis udp-galactopyranose	2	1	0.0
udp-galactopyranose mutase,2,1,0.0	udp-galactopyranose mutase	2	1	0.0
mutase superoxide,2,1,0.0	mutase superoxide	2	1	0.0
dismutase uncharacterized,2,1,0.0	dismutase uncharacterized	2	1	0.0
protein lipoprotein,2,1,0.0	protein lipoprotein	2	1	0.0
peptidase abc-type,2,1,0.0	peptidase abc-type	2	1	0.0
bacteria organic,2,1,0.0	bacteria organic	2	1	0.0
organic solvent,2,1,0.0	organic solvent	2	1	0.0
solvent tolerance,2,1,0.0	solvent tolerance	2	1	0.0
protein osta,2,1,0.0	protein osta	2	1	0.0
osta uncharacterized,2,1,0.0	osta uncharacterized	2	1	0.0
bacteria udp-n-acetylglucosamine,2,1,0.0	bacteria udp-n-acetylglucosamine	2	1	0.0
glycosyltransferase n-acetylglucosamine-6-phosphate,2,1,0.0	glycosyltransferase n-acetylglucosamine-6-phosphate	2	1	0.0
n-acetylglucosamine-6-phosphate deacetylase,2,1,0.0	n-acetylglucosamine-6-phosphate deacetylase	2	1	0.0
deacetylase methyl-accepting,2,1,0.0	deacetylase methyl-accepting	2	1	0.0
methyl-accepting chemotaxis,2,1,0.0	methyl-accepting chemotaxis	2	1	0.0
chemotaxis protein,2,1,0.0	chemotaxis protein	2	1	0.0
uncharacterized flavoproteins,2,1,0.0	uncharacterized flavoproteins	2	1	0.0
flavoproteins uncharacterized,2,1,0.0	flavoproteins uncharacterized	2	1	0.0
ii) predicted,2,1,0.0
methyltransferase recombinational,2,1,0.0	methyltransferase recombinational	2	1	0.0
hydrolase gtpase,2,1,0.0	hydrolase gtpase	2	1	0.0
gtpase abc-type,2,1,0.0	gtpase abc-type	2	1	0.0
abc-type bacteriocin/lantibiotic,2,1,0.0	abc-type bacteriocin/lantibiotic	2	1	0.0
bacteriocin/lantibiotic exporters,2,1,0.0	bacteriocin/lantibiotic exporters	2	1	0.0
exporters n-terminal,2,1,0.0	exporters n-terminal	2	1	0.0
n-terminal double-glycine,2,1,0.0	n-terminal double-glycine	2	1	0.0
double-glycine peptidase,2,1,0.0	double-glycine peptidase	2	1	0.0
peptidase domain,2,1,0.0	peptidase domain	2	1	0.0
protein thioredoxin-like,2,1,0.0	protein thioredoxin-like	2	1	0.0
thioredoxin-like proteins,2,1,0.0	thioredoxin-like proteins	2	1	0.0
proteins domains,2,1,0.0
domains endonuclease,2,1,0.0	domains endonuclease	2	1	0.0
iv superfamily,2,1,0.0
helicases uncharacterized,2,1,0.0	helicases uncharacterized	2	1	0.0
protein signal,2,1,0.0	protein signal	2	1	0.0
gtpase tyrosyl-trna,2,1,0.0	gtpase tyrosyl-trna	2	1	0.0
tyrosyl-trna synthetase,2,1,0.0	tyrosyl-trna synthetase	2	1	0.0
synthetase translation,2,1,0.0	synthetase translation	2	1	0.0
ts ribosomal,2,1,0.0	ts ribosomal	2	1	0.0
s2 predicted,2,1,0.0	s2 predicted	2	1	0.0
domain fkbp-type,2,1,0.0	domain fkbp-type	2	1	0.0
factor) atp-dependent,2,1,0.0	factor) atp-dependent	2	1	0.0
[truncated: 5,439 more rows]

## Sheet: b.4
Keyword/phrase removed
uncharacterized protein conserved bacteria
uncharacterized protein conserved archaea
uncharacterized conserved protein predicted
uncharacterized conserved protein uncharacterized
subunit 2 uncharacterized proteins
2 uncharacterized proteins homologs
protein conserved bacteria uncharacterized
alpha subunit uncharacterized conserved
subunit uncharacterized conserved protein
subunit uncharacterized protein conserved
component uncharacterized conserved protein
protein conserved archaea predicted
protein uncharacterized conserved protein
conserved protein uncharacterized protein
protein conserved bacteria predicted
protein uncharacterized protein conserved
enzymes uncharacterized conserved protein
related proteins uncharacterized protein
proteins uncharacterized protein conserved
conserved bacteria uncharacterized conserved
bacteria uncharacterized conserved protein
uncharacterized conserved protein type
conserved protein type ii
superfamily uncharacterized protein conserved
components membrane proteins related
conserved bacteria uncharacterized proteins
related uncharacterized enzymes predicted
iv uncharacterized protein conserved
binding protein) uncharacterized protein
protein) uncharacterized protein conserved
uncharacterized conserved protein enzyme
conserved protein enzyme involved
iv (family x) predicted
conserved protein superfamily ii
(bacterial type) predicted unusual
type) predicted unusual protein
superfamily uncharacterized conserved protein
(bacterial type) uncharacterized conserved
type) uncharacterized conserved protein
proteins protein predicted involved
ei component bacteria) predicted
chain uncharacterized conserved protein
pathway) uncharacterized protein conserved
conserved protein uncharacterized homolog
protein uncharacterized homolog plant
family uncharacterized protein conserved
protein conserved bacteria protein
conserved bacteria protein predicted
bacteria protein predicted involved
domain uncharacterized conserved protein
conserved protein predicted integral
bacterial type uncharacterized conserved
type uncharacterized conserved protein
superfamily) uncharacterized protein conserved
conserved protein uncharacterized conserved
related enzymes uncharacterized protein
enzymes uncharacterized protein conserved
protein conserved archaea uncharacterized
conserved archaea uncharacterized protein
archaea uncharacterized protein conserved
uncharacterized conserved protein
uncharacterized protein conserved
protein conserved bacteria
protein conserved archaea
conserved protein predicted
conserved protein uncharacterized
hydrolase subunit 2
subunit 2 uncharacterized
2 uncharacterized proteins
uncharacterized proteins homologs
binding protein (contains
conserved bacteria uncharacterized
subunit uncharacterized conserved
alpha subunit uncharacterized
subunit uncharacterized protein
component uncharacterized conserved
conserved archaea predicted
protein uncharacterized conserved
conserved bacteria predicted
protein uncharacterized protein
enzymes uncharacterized conserved
related proteins uncharacterized
proteins uncharacterized protein
conserved bacteria type
bacteria type ii
beta subunit putative
domains 5 -3
bacteria uncharacterized conserved
conserved protein type
protein type ii
related enzymes predicted
superfamily uncharacterized protein
bacteria uncharacterized proteins
homologs uncharacterized protein
related uncharacterized enzymes
uncharacterized enzymes predicted
(bacterial type) putative
iv uncharacterized protein
components predicted unusual
binding protein) uncharacterized
protein) uncharacterized protein
component related enzymes
conserved protein enzyme
protein enzyme involved
protein 2 predicted
(family x) predicted
iii delta subunit
protein superfamily ii
(bacterial type) predicted
type) predicted unusual
related proteins (includes
(bacterial type) uncharacterized
type) uncharacterized conserved
proteins protein predicted
component bacteria) predicted
pathway) uncharacterized protein
protein uncharacterized homolog
uncharacterized homolog plant
family uncharacterized protein
conserved bacteria protein
bacteria protein predicted
beta subunit predicted
domain uncharacterized conserved
enzymes related eukaryotic
domain protein uncharacterized
protein predicted integral
(class ii) predicted
iv superfamily ii
bacterial type uncharacterized
type uncharacterized conserved
superfamily) uncharacterized protein
(including n-terminal domain
- 3 -5
predicted unusual protein
domain type ii)
conserved protein/domain typically
iv (family x)
conserved protein superfamily
protein predicted involved
related enzymes uncharacterized
enzymes uncharacterized protein
conserved archaea uncharacterized
archaea uncharacterized protein
uncharacterized conserved
conserved protein
protein conserved
uncharacterized protein
conserved bacteria
protein predicted
protein uncharacterized
system involved
conserved archaea
alpha subunit
related enzymes
sigma subunit
protein (contains
protein possibly
related proteins
beta subunit
subunit 1
subunit 2
2 uncharacterized
proteins homologs
utilization protein
enzymes uncharacterized
(activity unknown)
delta subunit
bacteria uncharacterized
components predicted
domain protein
enzyme predicted
component related
protein required
gamma subunit
superfamily predicted
archaea predicted
biosynthesis protein
specificities (related
component uncharacterized
repeat predicted
uncharacterized proteins
(bacterial type)
bacteria predicted
subunit predicted
superfamily ii
subunit uncharacterized
component predicted
proteins multimeric
system predicted
proteins uncharacterized
bacteria type
subunit putative
domains 5
protein type
output domain
homolog involved
formation predicted
family 4
superfamily implicated
implicated cell
proteins superfamily
homologs uncharacterized
protein von
factor type
related uncharacterized
uncharacterized enzymes
type) putative
iv uncharacterized
binding protein)
protein) uncharacterized
gene predicted
family) predicted
enzyme related
protein related
superfamily) predicted
protein enzyme
enzyme involved
superfamily) cell
protein 2
2 predicted
x) predicted
iii delta
predicted outer
enzyme (predicted
type) predicted
protein involved
utilization related
proteins (includes
specialized sigma
type) uncharacterized
proteins 7
domain) predicted
chain superfamily
proteins protein
bacteria) predicted
chain uncharacterized
pathway) uncharacterized
family response
protein implicated
uncharacterized homolog
homolog plant
family uncharacterized
bacteria protein
domain uncharacterized
superfamily outer
domain) response
homologs predicted
enzymes related
related eukaryotic
factor outer
superfamily amino
protein 5
ii) predicted
proteins domains
iv superfamily
type uncharacterized
superfamily) uncharacterized
fold putative
proteins predicted
(class ii)
protein s2
5 -3
(including n-terminal
n-terminal domain
- 3
3 -5
family predicted
type ii
bacterial type
enzymes predicted
superfamily uncharacterized
proteins related
protein homologous
homologous eukaryotic
predicted unusual
unusual protein
pathway) predicted
domain type
type ii)
conserved protein/domain
protein/domain typically
iv (family
protein superfamily
involved cell
predicted involved
component bacteria)
protein putative
chain predicted
domain predicted
factors uncharacterized
archaea uncharacterized
subunit universal
homolog eukaryotic
vi subunit
protein
predicted
uncharacterized
conserved
subunit
related
system
component
superfamily
proteins
bacteria
domain
involved
systems
enzymes
superfamily)
family
components
ii
(contains
repeat
archaea
alpha
biosynthesis
enzyme
sigma
domain)
chain
possibly
putative
beta
di-
(n-terminal
n-terminal
auxiliary
mono-
variants
pathway
(activity
unknown)
delta
pathway)
protein)
molecular
complex
alpha/beta
integral
utilization
ii)
particle
required
factor)
binding
gamma
homolog
iii
assembly
homologs
multimeric
domains
specificities
(related
(alpha/beta
eukaryotic
(bacterial
type)
iv
including
outer
major
facilitator
type
cell
output
von
c-terminal
gene
family)
duplicated
(predicted
(includes
biosynthetic
specialized
t)
paralog)
(could
plant
ts
-3
(including
-
-5
cis-trans
(unclassified)
bacterial
fold
implicated
activity
homologous
unusual
protein/domain
typically
(family
x)
iia
(pts
ei
bacteria)
consisting
low-affinity
subunits
release
factors
n5
universal
component/domain
vi
high-affinity
homologs uncharacterized protein von
uncharacterized protein von

## Sheet: c.1
https://seoscout.com/tools/keyword-analyzer					COG0327 - COGs only		Organized by Uses/Uses (%)
Output: 1-word					Output: 2-word					Output: 3-word					Output: 4-word
Keyword	Words	Uses	Uses (%)		Keyword	Words	Uses	Uses (%)		Keyword	Words	Uses	Uses (%)		Keyword	Words	Uses	Uses (%)
cog0327	1	23	2.4		cog0327 cog1579	2	5	0.5		cog2049 cog1984 cog1540	3	3	0.3		cog0010 cog1899 cog0231 cog5542	4	2	0.2
cog1579	1	9	0.9		cog0327 cog2384	2	4	0.4		cog0010 cog1899 cog0231	3	2	0.2		cog0013 cog0640 cog1833 cog4018	4	2	0.2
cog0568	1	7	0.7		cog0568 cog0358	2	3	0.3		cog0013 cog0640 cog1833	3	2	0.2		cog0024 cog1672 cog4074 cog0010	4	2	0.2
cog0358	1	6	0.6		cog1131 cog0842	2	3	0.3		cog0024 cog1672 cog4074	3	2	0.2		cog0076 cog4055 cog4054 cog0719	4	2	0.2
cog0457	1	6	0.6		cog1671 cog0428	2	3	0.3		cog0076 cog4055 cog4054	3	2	0.2		cog0226 cog4063 cog4064 cog4065	4	2	0.2
cog2384	1	6	0.6		cog1984 cog1540	2	3	0.3		cog0226 cog4063 cog4064	3	2	0.2		cog0231 cog5542 cog0671 cog0655	4	2	0.2
cog0079	1	5	0.5		cog2049 cog1984	2	3	0.3		cog0231 cog5542 cog0671	3	2	0.2		cog0311 cog1117 cog4218 cog4057	4	2	0.2
cog0240	1	5	0.5		cog0010 cog1899	2	2	0.2		cog0311 cog1117 cog4218	3	2	0.2		cog0327 cog2049 cog1984 cog1540	4	2	0.2
cog0328	1	5	0.5		cog0013 cog0640	2	2	0.2		cog0327 cog2049 cog1984	3	2	0.2		cog0327 cog2384 cog0665 cog2195	4	2	0.2
cog0500	1	5	0.5		cog0024 cog1672	2	2	0.2		cog0327 cog2384 cog0665	3	2	0.2		cog0327 cog2890 cog5431 cog4017	4	2	0.2
cog0513	1	5	0.5		cog0041 cog1196	2	2	0.2		cog0327 cog2384 cog1579	3	2	0.2		cog0343 cog2896 cog0622 cog0628	4	2	0.2
cog0596	1	5	0.5		cog0076 cog4055	2	2	0.2		cog0327 cog2890 cog5431	3	2	0.2		cog0388 cog0639 cog1423 cog1509	4	2	0.2
cog0655	1	5	0.5		cog0102 cog0103	2	2	0.2		cog0343 cog2896 cog0622	3	2	0.2		cog0396 cog0697 cog2266 cog1697	4	2	0.2
cog0752	1	5	0.5		cog0226 cog4063	2	2	0.2		cog0388 cog0639 cog1423	3	2	0.2		cog0415 cog3272 cog2039 cog1683	4	2	0.2
cog0826	1	5	0.5		cog0231 cog5542	2	2	0.2		cog0396 cog0697 cog2266	3	2	0.2		cog0500 cog0076 cog4055 cog4054	4	2	0.2
cog1028	1	5	0.5		cog0240 cog0778	2	2	0.2		cog0415 cog3272 cog2039	3	2	0.2		cog0502 cog4016 cog4019 cog4015	4	2	0.2
cog1897	1	5	0.5		cog0258 cog3744	2	2	0.2		cog0500 cog0076 cog4055	3	2	0.2		cog0573 cog4060 cog4061 cog2957	4	2	0.2
cog0177	1	4	0.4		cog0311 cog1117	2	2	0.2		cog0502 cog4016 cog4019	3	2	0.2		cog0581 cog1970 cog1348 cog0343	4	2	0.2
cog0477	1	4	0.4		cog0327 cog0568	2	2	0.2		cog0573 cog4060 cog4061	3	2	0.2		cog0589 cog4056 cog0615 cog4059	4	2	0.2
cog0494	1	4	0.4		cog0327 cog2049	2	2	0.2		cog0581 cog1970 cog1348	3	2	0.2		cog0615 cog4059 cog4058 cog1873	4	2	0.2
cog0531	1	4	0.4		cog0327 cog2890	2	2	0.2		cog0589 cog4056 cog0615	3	2	0.2		cog0622 cog0628 cog1962 cog0834	4	2	0.2
cog0541	1	4	0.4		cog0335 cog0336	2	2	0.2		cog0615 cog4059 cog4058	3	2	0.2		cog0628 cog1962 cog0834 cog0226	4	2	0.2
cog0564	1	4	0.4		cog0343 cog2896	2	2	0.2		cog0622 cog0628 cog1962	3	2	0.2		cog0639 cog1423 cog1509 cog0396	4	2	0.2
cog0639	1	4	0.4		cog0388 cog0639	2	2	0.2		cog0628 cog1962 cog0834	3	2	0.2		cog0640 cog1833 cog4018 cog0024	4	2	0.2
cog0648	1	4	0.4		cog0396 cog0697	2	2	0.2		cog0639 cog1423 cog1509	3	2	0.2		cog0655 cog4085 cog0500 cog0076	4	2	0.2
cog0735	1	4	0.4		cog0406 cog0328	2	2	0.2		cog0640 cog1833 cog4018	3	2	0.2		cog0671 cog0655 cog4085 cog0500	4	2	0.2
cog0751	1	4	0.4		cog0415 cog3272	2	2	0.2		cog0655 cog4085 cog0500	3	2	0.2		cog0697 cog2266 cog1697 cog0704	4	2	0.2
cog0760	1	4	0.4		cog0500 cog0076	2	2	0.2		cog0671 cog0655 cog4085	3	2	0.2		cog0719 cog0311 cog1117 cog4218	4	2	0.2
cog0766	1	4	0.4		cog0502 cog4016	2	2	0.2		cog0697 cog2266 cog1697	3	2	0.2		cog0834 cog0226 cog4063 cog4064	4	2	0.2
cog1131	1	4	0.4		cog0531 cog1087	2	2	0.2		cog0719 cog0311 cog1117	3	2	0.2		cog1117 cog4218 cog4057 cog0589	4	2	0.2
cog1194	1	4	0.4		cog0553 cog1169	2	2	0.2		cog0834 cog0226 cog4063	3	2	0.2		cog1348 cog0343 cog2896 cog0622	4	2	0.2
cog1196	1	4	0.4		cog0572 cog0232	2	2	0.2		cog1087 cog0639 cog4347	3	2	0.2		cog1423 cog1509 cog0396 cog0697	4	2	0.2
cog1671	1	4	0.4		cog0573 cog4060	2	2	0.2		cog1117 cog4218 cog4057	3	2	0.2		cog1509 cog0396 cog0697 cog2266	4	2	0.2
cog1802	1	4	0.4		cog0581 cog1970	2	2	0.2		cog1348 cog0343 cog2896	3	2	0.2		cog1672 cog4074 cog0010 cog1899	4	2	0.2
cog0040	1	3	0.3		cog0589 cog4056	2	2	0.2		cog1423 cog1509 cog0396	3	2	0.2		cog1833 cog4018 cog0024 cog1672	4	2	0.2
cog0041	1	3	0.3		cog0615 cog4059	2	2	0.2		cog1509 cog0396 cog0697	3	2	0.2		cog1873 cog0581 cog1970 cog1348	4	2	0.2
cog0141	1	3	0.3		cog0622 cog0628	2	2	0.2		cog1672 cog4074 cog0010	3	2	0.2		cog1899 cog0231 cog5542 cog0671	4	2	0.2
cog0147	1	3	0.3		cog0628 cog1962	2	2	0.2		cog1697 cog0704 cog0327	3	2	0.2		cog1962 cog0834 cog0226 cog4063	4	2	0.2
cog0210	1	3	0.3		cog0639 cog1423	2	2	0.2		cog1833 cog4018 cog0024	3	2	0.2		cog1970 cog1348 cog0343 cog2896	4	2	0.2
cog0225	1	3	0.3		cog0639 cog4347	2	2	0.2		cog1873 cog0581 cog1970	3	2	0.2		cog2016 cog0502 cog4016 cog4019	4	2	0.2
cog0228	1	3	0.3		cog0640 cog1833	2	2	0.2		cog1899 cog0231 cog5542	3	2	0.2		cog2266 cog1697 cog0704 cog0327	4	2	0.2
cog0232	1	3	0.3		cog0655 cog4085	2	2	0.2		cog1962 cog0834 cog0226	3	2	0.2		cog2890 cog5431 cog4017 cog2016	4	2	0.2
cog0266	1	3	0.3		cog0665 cog2195	2	2	0.2		cog1970 cog1348 cog0343	3	2	0.2		cog2896 cog0622 cog0628 cog1962	4	2	0.2
cog0271	1	3	0.3		cog0671 cog0655	2	2	0.2		cog2016 cog0502 cog4016	3	2	0.2		cog2957 cog4062 cog0388 cog0639	4	2	0.2
cog0335	1	3	0.3		cog0697 cog2266	2	2	0.2		cog2266 cog1697 cog0704	3	2	0.2		cog4015 cog0013 cog0640 cog1833	4	2	0.2
cog0336	1	3	0.3		cog0704 cog0327	2	2	0.2		cog2384 cog0665 cog2195	3	2	0.2		cog4016 cog4019 cog4015 cog0013	4	2	0.2
cog0351	1	3	0.3		cog0719 cog0311	2	2	0.2		cog2890 cog5431 cog4017	3	2	0.2		cog4017 cog2016 cog0502 cog4016	4	2	0.2
cog0406	1	3	0.3		cog0747 cog1073	2	2	0.2		cog2896 cog0622 cog0628	3	2	0.2		cog4018 cog0024 cog1672 cog4074	4	2	0.2
cog0415	1	3	0.3		cog0751 cog0752	2	2	0.2		cog2957 cog4062 cog0388	3	2	0.2		cog4019 cog4015 cog0013 cog0640	4	2	0.2
cog0428	1	3	0.3		cog0767 cog0766	2	2	0.2		cog3272 cog2039 cog1683	3	2	0.2		cog4054 cog0719 cog0311 cog1117	4	2	0.2
cog0503	1	3	0.3		cog0834 cog0226	2	2	0.2		cog4015 cog0013 cog0640	3	2	0.2		cog4055 cog4054 cog0719 cog0311	4	2	0.2
cog0525	1	3	0.3		cog1014 cog1013	2	2	0.2		cog4016 cog4019 cog4015	3	2	0.2		cog4056 cog0615 cog4059 cog4058	4	2	0.2
cog0601	1	3	0.3		cog1087 cog0639	2	2	0.2		cog4017 cog2016 cog0502	3	2	0.2		cog4057 cog0589 cog4056 cog0615	4	2	0.2
cog0607	1	3	0.3		cog1117 cog4218	2	2	0.2		cog4018 cog0024 cog1672	3	2	0.2		cog4058 cog1873 cog0581 cog1970	4	2	0.2
cog0628	1	3	0.3		cog1209 cog1898	2	2	0.2		cog4019 cog4015 cog0013	3	2	0.2		cog4059 cog4058 cog1873 cog0581	4	2	0.2
cog0665	1	3	0.3		cog1290 cog0723	2	2	0.2		cog4054 cog0719 cog0311	3	2	0.2		cog4060 cog4061 cog2957 cog4062	4	2	0.2
cog0682	1	3	0.3		cog1306 cog1796	2	2	0.2		cog4055 cog4054 cog0719	3	2	0.2		cog4061 cog2957 cog4062 cog0388	4	2	0.2
cog0695	1	3	0.3		cog1322 cog1793	2	2	0.2		cog4056 cog0615 cog4059	3	2	0.2		cog4062 cog0388 cog0639 cog1423	4	2	0.2
cog0699	1	3	0.3		cog1348 cog0343	2	2	0.2		cog4057 cog0589 cog4056	3	2	0.2		cog4063 cog4064 cog4065 cog0573	4	2	0.2
cog0747	1	3	0.3		cog1423 cog1509	2	2	0.2		cog4058 cog1873 cog0581	3	2	0.2		cog4064 cog4065 cog0573 cog4060	4	2	0.2
cog0761	1	3	0.3		cog1509 cog0396	2	2	0.2		cog4059 cog4058 cog1873	3	2	0.2		cog4065 cog0573 cog4060 cog4061	4	2	0.2
cog0767	1	3	0.3		cog1672 cog4074	2	2	0.2		cog4060 cog4061 cog2957	3	2	0.2		cog4074 cog0010 cog1899 cog0231	4	2	0.2
cog0778	1	3	0.3		cog1697 cog0704	2	2	0.2		cog4061 cog2957 cog4062	3	2	0.2		cog4085 cog0500 cog0076 cog4055	4	2	0.2
cog0806	1	3	0.3		cog1833 cog4018	2	2	0.2		cog4062 cog0388 cog0639	3	2	0.2		cog4218 cog4057 cog0589 cog4056	4	2	0.2
cog0842	1	3	0.3		cog1873 cog0581	2	2	0.2		cog4063 cog4064 cog4065	3	2	0.2		cog5431 cog4017 cog2016 cog0502	4	2	0.2
cog1087	1	3	0.3		cog1899 cog0231	2	2	0.2		cog4064 cog4065 cog0573	3	2	0.2		cog5542 cog0671 cog0655 cog4085	4	2	0.2
cog1088	1	3	0.3		cog1962 cog0834	2	2	0.2		cog4065 cog0573 cog4060	3	2	0.2		cog0008 cog0457 cog0215 cog0327	4	1	0.1
cog1108	1	3	0.3		cog1970 cog1348	2	2	0.2		cog4074 cog0010 cog1899	3	2	0.2		cog0008 cog2893 cog1925 cog5124	4	1	0.1
cog1121	1	3	0.3		cog2010 cog0503	2	2	0.2		cog4085 cog0500 cog0076	3	2	0.2		cog0009 cog0735 cog0727 cog0674	4	1	0.1
cog1124	1	3	0.3		cog2016 cog0502	2	2	0.2		cog4218 cog4057 cog0589	3	2	0.2		cog0009 cog0767 cog1108 cog0626	4	1	0.1
cog1127	1	3	0.3		cog2039 cog1683	2	2	0.2		cog5431 cog4017 cog2016	3	2	0.2		cog0016 cog0177 cog0152 cog0178	4	1	0.1
cog1209	1	3	0.3		cog2266 cog1697	2	2	0.2		cog5542 cog0671 cog0655	3	2	0.2		cog0033 cog0582 cog3104 cog0330	4	1	0.1
cog1227	1	3	0.3		cog2384 cog0665	2	2	0.2		cog0008 cog0457 cog0215	3	1	0.1		cog0036 cog1104 cog1396 cog1387	4	1	0.1
cog1284	1	3	0.3		cog2384 cog1579	2	2	0.2		cog0008 cog2893 cog1925	3	1	0.1		cog0037 cog0016 cog0177 cog0152	4	1	0.1
cog1463	1	3	0.3		cog2890 cog5431	2	2	0.2		cog0009 cog0735 cog0727	3	1	0.1		cog0040 cog1028 cog0695 cog1692	4	1	0.1
cog1519	1	3	0.3		cog2893 cog1925	2	2	0.2		cog0009 cog0767 cog1108	3	1	0.1		cog0040 cog2060 cog5610 cog1982	4	1	0.1
cog1540	1	3	0.3		cog2896 cog0622	2	2	0.2		cog0016 cog0177 cog0152	3	1	0.1		cog0040 cog5212 cog0695 cog2060	4	1	0.1
cog1683	1	3	0.3		cog2957 cog4062	2	2	0.2		cog0033 cog0582 cog3104	3	1	0.1		cog0041 cog0494 cog1430 cog0177	4	1	0.1
cog1692	1	3	0.3		cog3272 cog2039	2	2	0.2		cog0036 cog1104 cog1396	3	1	0.1		cog0041 cog1196 cog0541 cog0228	4	1	0.1
cog1806	1	3	0.3		cog3817 cog3819	2	2	0.2		cog0037 cog0016 cog0177	3	1	0.1		cog0041 cog1196 cog3819 cog1127	4	1	0.1
cog1837	1	3	0.3		cog4015 cog0013	2	2	0.2		cog0040 cog1028 cog0695	3	1	0.1		cog0052 cog1386 cog0544 cog0466	4	1	0.1
cog1898	1	3	0.3		cog4016 cog4019	2	2	0.2		cog0040 cog2060 cog5610	3	1	0.1		cog0052 cog1806 cog1227 cog1802	4	1	0.1
cog1984	1	3	0.3		cog4017 cog2016	2	2	0.2		cog0040 cog5212 cog0695	3	1	0.1		cog0075 cog1427 cog0612 cog3387	4	1	0.1
cog1995	1	3	0.3		cog4018 cog0024	2	2	0.2		cog0041 cog0494 cog1430	3	1	0.1		cog0079 cog0406 cog0327 cog0568	4	1	0.1
cog2010	1	3	0.3		cog4019 cog4015	2	2	0.2		cog0041 cog1196 cog0541	3	1	0.1		cog0079 cog0494 cog0749 cog0258	4	1	0.1
cog2039	1	3	0.3		cog4054 cog0719	2	2	0.2		cog0041 cog1196 cog3819	3	1	0.1		cog0079 cog0583 cog0271 cog1052	4	1	0.1
cog2049	1	3	0.3		cog4055 cog4054	2	2	0.2		cog0052 cog1386 cog0544	3	1	0.1		cog0079 cog0617 cog1682 cog0271	4	1	0.1
cog2195	1	3	0.3		cog4056 cog0615	2	2	0.2		cog0052 cog1806 cog1227	3	1	0.1		cog0079 cog3935 cog0423 cog0415	4	1	0.1
cog2854	1	3	0.3		cog4057 cog0589	2	2	0.2		cog0075 cog1427 cog0612	3	1	0.1		cog0102 cog0103 cog0491 cog0179	4	1	0.1
cog3103	1	3	0.3		cog4058 cog1873	2	2	0.2		cog0079 cog0406 cog0327	3	1	0.1		cog0102 cog0103 cog1982 cog0452	4	1	0.1
cog3113	1	3	0.3		cog4059 cog4058	2	2	0.2		cog0079 cog0494 cog0749	3	1	0.1		cog0103 cog0491 cog0179 cog1322	4	1	0.1
cog3133	1	3	0.3		cog4060 cog4061	2	2	0.2		cog0079 cog0583 cog0271	3	1	0.1		cog0103 cog1982 cog0452 cog2197	4	1	0.1
cog3272	1	3	0.3		cog4061 cog2957	2	2	0.2		cog0079 cog0617 cog1682	3	1	0.1		cog0110 cog0079 cog0406 cog0327	4	1	0.1
cog3817	1	3	0.3		cog4062 cog0388	2	2	0.2		cog0079 cog3935 cog0423	3	1	0.1		cog0110 cog0766 cog4603 cog0125	4	1	0.1
cog3819	1	3	0.3		cog4063 cog4064	2	2	0.2		cog0102 cog0103 cog0491	3	1	0.1		cog0115 cog0544 cog0352 cog0351	4	1	0.1
cog3935	1	3	0.3		cog4064 cog4065	2	2	0.2		cog0102 cog0103 cog1982	3	1	0.1		cog0115 cog2309 cog0147 cog1716	4	1	0.1
cog0008	1	2	0.2		cog4065 cog0573	2	2	0.2		cog0103 cog0491 cog0179	3	1	0.1		cog0116 cog0635 cog1306 cog1796	4	1	0.1
cog0009	1	2	0.2		cog4074 cog0010	2	2	0.2		cog0103 cog1982 cog0452	3	1	0.1		cog0116 cog1306 cog1796 cog1228	4	1	0.1
cog0010	1	2	0.2		cog4085 cog0500	2	2	0.2		cog0110 cog0079 cog0406	3	1	0.1		cog0125 cog0735 cog1132 cog0751	4	1	0.1
cog0013	1	2	0.2		cog4218 cog4057	2	2	0.2		cog0110 cog0766 cog4603	3	1	0.1		cog0125 cog1430 cog0346 cog3823	4	1	0.1
cog0024	1	2	0.2		cog5431 cog4017	2	2	0.2		cog0115 cog0544 cog0352	3	1	0.1		cog0130 cog3708 cog1551 cog1947	4	1	0.1
cog0052	1	2	0.2		cog5542 cog0671	2	2	0.2		cog0115 cog2309 cog0147	3	1	0.1		cog0136 cog1466 cog0295 cog4932	4	1	0.1
cog0076	1	2	0.2		cog0008 cog0457	2	1	0.1		cog0116 cog0635 cog1306	3	1	0.1		cog0141 cog0477 cog3113 cog1080	4	1	0.1
cog0102	1	2	0.2		cog0008 cog2893	2	1	0.1		cog0116 cog1306 cog1796	3	1	0.1		cog0141 cog1144 cog0147 cog1475	4	1	0.1
cog0103	1	2	0.2		cog0009 cog0735	2	1	0.1		cog0125 cog0735 cog1132	3	1	0.1		cog0141 cog2911 cog2819 cog0531	4	1	0.1
cog0110	1	2	0.2		cog0009 cog0767	2	1	0.1		cog0125 cog1430 cog0346	3	1	0.1		cog0145 cog1028 cog0620 cog1160	4	1	0.1
cog0115	1	2	0.2		cog0016 cog0177	2	1	0.1		cog0130 cog3708 cog1551	3	1	0.1		cog0146 cog2229 cog0477 cog3323	4	1	0.1
cog0116	1	2	0.2		cog0033 cog0582	2	1	0.1		cog0136 cog1466 cog0295	3	1	0.1		cog0147 cog0525 cog3842 cog0739	4	1	0.1
cog0125	1	2	0.2		cog0036 cog1104	2	1	0.1		cog0141 cog0477 cog3113	3	1	0.1		cog0147 cog1475 cog1284 cog1137	4	1	0.1
cog0215	1	2	0.2		cog0037 cog0016	2	1	0.1		cog0141 cog1144 cog0147	3	1	0.1		cog0147 cog1716 cog1413 cog0673	4	1	0.1
cog0217	1	2	0.2		cog0040 cog1028	2	1	0.1		cog0141 cog2911 cog2819	3	1	0.1		cog0152 cog0178 cog1131 cog0789	4	1	0.1
cog0221	1	2	0.2		cog0040 cog2060	2	1	0.1		cog0145 cog1028 cog0620	3	1	0.1		cog0157 cog1792 cog2352 cog2893	4	1	0.1
cog0226	1	2	0.2		cog0040 cog5212	2	1	0.1		cog0146 cog2229 cog0477	3	1	0.1		cog0162 cog0264 cog0052 cog1386	4	1	0.1
cog0231	1	2	0.2		cog0041 cog0494	2	1	0.1		cog0147 cog0525 cog3842	3	1	0.1		cog0173 cog2314 cog0225 cog2839	4	1	0.1
cog0236	1	2	0.2		cog0052 cog1386	2	1	0.1		cog0147 cog1475 cog1284	3	1	0.1		cog0177 cog0152 cog0178 cog1131	4	1	0.1
cog0245	1	2	0.2		cog0052 cog1806	2	1	0.1		cog0147 cog1716 cog1413	3	1	0.1		cog0177 cog0568 cog1897 cog0513	4	1	0.1
cog0258	1	2	0.2		cog0075 cog1427	2	1	0.1		cog0152 cog0178 cog1131	3	1	0.1		cog0177 cog0761 cog1227 cog0441	4	1	0.1
cog0264	1	2	0.2		cog0079 cog0406	2	1	0.1		cog0157 cog1792 cog2352	3	1	0.1		cog0177 cog1196 cog0513 cog0699	4	1	0.1
cog0272	1	2	0.2		cog0079 cog0494	2	1	0.1		cog0162 cog0264 cog0052	3	1	0.1		cog0178 cog1131 cog0789 cog2003	4	1	0.1
cog0311	1	2	0.2		cog0079 cog0583	2	1	0.1		cog0173 cog2314 cog0225	3	1	0.1		cog0179 cog1322 cog1793 cog0583	4	1	0.1
cog0319	1	2	0.2		cog0079 cog0617	2	1	0.1		cog0177 cog0152 cog0178	3	1	0.1		cog0183 cog0576 cog2131 cog2270	4	1	0.1
cog0343	1	2	0.2		cog0079 cog3935	2	1	0.1		cog0177 cog0568 cog1897	3	1	0.1		cog0205 cog2270 cog0173 cog2314	4	1	0.1
cog0344	1	2	0.2		cog0103 cog0491	2	1	0.1		cog0177 cog0761 cog1227	3	1	0.1		cog0206 cog1112 cog0221 cog0693	4	1	0.1
cog0346	1	2	0.2		cog0103 cog1982	2	1	0.1		cog0177 cog1196 cog0513	3	1	0.1		cog0210 cog0236 cog1872 cog0739	4	1	0.1
cog0352	1	2	0.2		cog0110 cog0079	2	1	0.1		cog0178 cog1131 cog0789	3	1	0.1		cog0210 cog0756 cog0079 cog0583	4	1	0.1
cog0388	1	2	0.2		cog0110 cog0766	2	1	0.1		cog0179 cog1322 cog1793	3	1	0.1		cog0210 cog1366 cog0079 cog0617	4	1	0.1
cog0396	1	2	0.2		cog0115 cog0544	2	1	0.1		cog0183 cog0576 cog2131	3	1	0.1		cog0215 cog0327 cog1579 cog1519	4	1	0.1
cog0423	1	2	0.2		cog0115 cog2309	2	1	0.1		cog0205 cog2270 cog0173	3	1	0.1		cog0215 cog2969 cog0745 cog0040	4	1	0.1
cog0438	1	2	0.2		cog0116 cog0635	2	1	0.1		cog0206 cog1112 cog0221	3	1	0.1		cog0217 cog1011 cog3103 cog1606	4	1	0.1
cog0441	1	2	0.2		cog0116 cog1306	2	1	0.1		cog0210 cog0236 cog1872	3	1	0.1		cog0217 cog4118 cog2314 cog2966	4	1	0.1
cog0452	1	2	0.2		cog0125 cog0735	2	1	0.1		cog0210 cog0756 cog0079	3	1	0.1		cog0221 cog0607 cog1837 cog1121	4	1	0.1
cog0454	1	2	0.2		cog0125 cog1430	2	1	0.1		cog0210 cog1366 cog0079	3	1	0.1		cog0221 cog0693 cog0327 cog1579	4	1	0.1
cog0461	1	2	0.2		cog0130 cog3708	2	1	0.1		cog0215 cog0327 cog1579	3	1	0.1		cog0225 cog0206 cog1112 cog0221	4	1	0.1
cog0463	1	2	0.2		cog0136 cog1466	2	1	0.1		cog0215 cog2969 cog0745	3	1	0.1		cog0225 cog1060 cog1023 cog0075	4	1	0.1
cog0466	1	2	0.2		cog0141 cog0477	2	1	0.1		cog0217 cog1011 cog3103	3	1	0.1		cog0225 cog2839 cog0147 cog0525	4	1	0.1
cog0481	1	2	0.2		cog0141 cog1144	2	1	0.1		cog0217 cog4118 cog2314	3	1	0.1		cog0228 cog0806 cog1463 cog0699	4	1	0.1
cog0491	1	2	0.2		cog0141 cog2911	2	1	0.1		cog0221 cog0607 cog1837	3	1	0.1		cog0228 cog1763 cog3113 cog1387	4	1	0.1
cog0502	1	2	0.2		cog0145 cog1028	2	1	0.1		cog0221 cog0693 cog0327	3	1	0.1		cog0228 cog1837 cog0335 cog0336	4	1	0.1
cog0542	1	2	0.2		cog0146 cog2229	2	1	0.1		cog0225 cog0206 cog1112	3	1	0.1		cog0232 cog0801 cog0217 cog4118	4	1	0.1
cog0544	1	2	0.2		cog0147 cog0525	2	1	0.1		cog0225 cog1060 cog1023	3	1	0.1		cog0232 cog1293 cog0328 cog1174	4	1	0.1
cog0553	1	2	0.2		cog0147 cog1475	2	1	0.1		cog0225 cog2839 cog0147	3	1	0.1		cog0232 cog3937 cog0328 cog1293	4	1	0.1
cog0572	1	2	0.2		cog0147 cog1716	2	1	0.1		cog0228 cog0806 cog1463	3	1	0.1		cog0236 cog1295 cog0625 cog0245	4	1	0.1
cog0573	1	2	0.2		cog0152 cog0178	2	1	0.1		cog0228 cog1763 cog3113	3	1	0.1		cog0236 cog1872 cog0739 cog0130	4	1	0.1
cog0581	1	2	0.2		cog0157 cog1792	2	1	0.1		cog0228 cog1837 cog0335	3	1	0.1		cog0240 cog0720 cog0626 cog0146	4	1	0.1
cog0582	1	2	0.2		cog0162 cog0264	2	1	0.1		cog0232 cog0801 cog0217	3	1	0.1		cog0240 cog0778 cog0682 cog0415	4	1	0.1
cog0583	1	2	0.2		cog0173 cog2314	2	1	0.1		cog0232 cog1293 cog0328	3	1	0.1		cog0240 cog0778 cog0826 cog0041	4	1	0.1
cog0589	1	2	0.2		cog0177 cog0152	2	1	0.1		cog0232 cog3937 cog0328	3	1	0.1		cog0240 cog2821 cog0327 cog1579	4	1	0.1
cog0597	1	2	0.2		cog0177 cog0568	2	1	0.1		cog0236 cog1295 cog0625	3	1	0.1		cog0240 cog3272 cog1897 cog0826	4	1	0.1
cog0603	1	2	0.2		cog0177 cog0761	2	1	0.1		cog0236 cog1872 cog0739	3	1	0.1		cog0245 cog1211 cog0328 cog0008	4	1	0.1
cog0605	1	2	0.2		cog0177 cog1196	2	1	0.1		cog0240 cog0720 cog0626	3	1	0.1		cog0245 cog1290 cog0723 cog2857	4	1	0.1
cog0612	1	2	0.2		cog0178 cog1131	2	1	0.1		cog0240 cog0778 cog0682	3	1	0.1		cog0249 cog3655 cog0451 cog0658	4	1	0.1
cog0615	1	2	0.2		cog0179 cog1322	2	1	0.1		cog0240 cog0778 cog0826	3	1	0.1		cog0258 cog3744 cog0110 cog0766	4	1	0.1
cog0615	1	2	0.2		cog0183 cog0576	2	1	0.1		cog0240 cog2821 cog0327	3	1	0.1		cog0258 cog3744 cog2966 cog1523	4	1	0.1
cog0622	1	2	0.2		cog0205 cog2270	2	1	0.1		cog0240 cog3272 cog1897	3	1	0.1		cog0264 cog0052 cog1386 cog0544	4	1	0.1
cog0625	1	2	0.2		cog0206 cog1112	2	1	0.1		cog0245 cog1211 cog0328	3	1	0.1		cog0264 cog0258 cog3744 cog0110	4	1	0.1
cog0626	1	2	0.2		cog0210 cog0236	2	1	0.1		cog0245 cog1290 cog0723	3	1	0.1		cog0266 cog0415 cog3272 cog2039	4	1	0.1
cog0634	1	2	0.2		cog0210 cog0756	2	1	0.1		cog0249 cog3655 cog0451	3	1	0.1		cog0266 cog1194 cog0358 cog0752	4	1	0.1
cog0640	1	2	0.2		cog0210 cog1366	2	1	0.1		cog0258 cog3744 cog0110	3	1	0.1		cog0266 cog1519 cog0564 cog0752	4	1	0.1
cog0661	1	2	0.2		cog0215 cog0327	2	1	0.1		cog0258 cog3744 cog2966	3	1	0.1		cog0268 cog2094 cog2211 cog3937	4	1	0.1
cog0671	1	2	0.2		cog0215 cog2969	2	1	0.1		cog0264 cog0052 cog1386	3	1	0.1		cog0271 cog1014 cog1013 cog0009	4	1	0.1
cog0674	1	2	0.2		cog0217 cog1011	2	1	0.1		cog0264 cog0258 cog3744	3	1	0.1		cog0271 cog1052 cog3104 cog0008	4	1	0.1
cog0697	1	2	0.2		cog0217 cog4118	2	1	0.1		cog0266 cog0415 cog3272	3	1	0.1		cog0271 cog2084 cog3103 cog0728	4	1	0.1
cog0704	1	2	0.2		cog0221 cog0607	2	1	0.1		cog0266 cog1194 cog0358	3	1	0.1		cog0272 cog0481 cog1853 cog0525	4	1	0.1
cog0719	1	2	0.2		cog0221 cog0693	2	1	0.1		cog0266 cog1519 cog0564	3	1	0.1		cog0272 cog0572 cog0232 cog3937	4	1	0.1
cog0720	1	2	0.2		cog0225 cog0206	2	1	0.1		cog0268 cog2094 cog2211	3	1	0.1		cog0295 cog4932 cog0747 cog1073	4	1	0.1
cog0723	1	2	0.2		cog0225 cog1060	2	1	0.1		cog0271 cog1014 cog1013	3	1	0.1		cog0319 cog1159 cog2274 cog0344	4	1	0.1
cog0727	1	2	0.2		cog0225 cog2839	2	1	0.1		cog0271 cog1052 cog3104	3	1	0.1		cog0319 cog1882 cog0655 cog0249	4	1	0.1
cog0739	1	2	0.2		cog0228 cog0806	2	1	0.1		cog0271 cog2084 cog3103	3	1	0.1		cog0323 cog0327 cog2384 cog0665	4	1	0.1
cog0745	1	2	0.2		cog0228 cog1763	2	1	0.1		cog0272 cog0481 cog1853	3	1	0.1		cog0324 cog1917 cog0845 cog1706	4	1	0.1
cog0749	1	2	0.2		cog0228 cog1837	2	1	0.1		cog0272 cog0572 cog0232	3	1	0.1		cog0327 cog0115 cog2309 cog0147	4	1	0.1
cog0789	1	2	0.2		cog0232 cog0801	2	1	0.1		cog0295 cog4932 cog0747	3	1	0.1		cog0327 cog0125 cog1430 cog0346	4	1	0.1
cog0793	1	2	0.2		cog0232 cog1293	2	1	0.1		cog0319 cog1159 cog2274	3	1	0.1		cog0327 cog0327 cog2890 cog5431	4	1	0.1
cog0801	1	2	0.2		cog0232 cog3937	2	1	0.1		cog0319 cog1882 cog0655	3	1	0.1		cog0327 cog0568 cog0358 cog0423	4	1	0.1
cog0834	1	2	0.2		cog0236 cog1295	2	1	0.1		cog0323 cog0327 cog2384	3	1	0.1		cog0327 cog0568 cog1191 cog0760	4	1	0.1
cog1011	1	2	0.2		cog0236 cog1872	2	1	0.1		cog0324 cog1917 cog0845	3	1	0.1		cog0327 cog0597 cog1137 cog1496	4	1	0.1
cog1013	1	2	0.2		cog0240 cog0720	2	1	0.1		cog0327 cog0115 cog2309	3	1	0.1		cog0327 cog1194 cog1164 cog0564	4	1	0.1
cog1014	1	2	0.2		cog0240 cog2821	2	1	0.1		cog0327 cog0125 cog1430	3	1	0.1		cog0327 cog1579 cog0245 cog1211	4	1	0.1
cog1073	1	2	0.2		cog0240 cog3272	2	1	0.1		cog0327 cog0327 cog2890	3	1	0.1		cog0327 cog1579 cog0406 cog0328	4	1	0.1
cog1080	1	2	0.2		cog0245 cog1211	2	1	0.1		cog0327 cog0568 cog0358	3	1	0.1		cog0327 cog1579 cog0526 cog0457	4	1	0.1
cog1117	1	2	0.2		cog0245 cog1290	2	1	0.1		cog0327 cog0568 cog1191	3	1	0.1		cog0327 cog1579 cog1144 cog1014	4	1	0.1
cog1132	1	2	0.2		cog0249 cog3655	2	1	0.1		cog0327 cog0597 cog1137	3	1	0.1		cog0327 cog1579 cog1519 cog0752	4	1	0.1
cog1137	1	2	0.2		cog0264 cog0052	2	1	0.1		cog0327 cog1194 cog1164	3	1	0.1		cog0327 cog1995 cog2857 cog0477	4	1	0.1
cog1144	1	2	0.2		cog0264 cog0258	2	1	0.1		cog0327 cog1579 cog0245	3	1	0.1		cog0327 cog2384 cog1579 cog0568	4	1	0.1
cog1159	1	2	0.2		cog0266 cog0415	2	1	0.1		cog0327 cog1579 cog0406	3	1	0.1		cog0327 cog2384 cog1579 cog2049	4	1	0.1
cog1165	1	2	0.2		cog0266 cog1194	2	1	0.1		cog0327 cog1579 cog0526	3	1	0.1		cog0327 cog3481 cog1797 cog1284	4	1	0.1
cog1169	1	2	0.2		cog0266 cog1519	2	1	0.1		cog0327 cog1579 cog1144	3	1	0.1		cog0328 cog0008 cog0457 cog0215	4	1	0.1
cog1173	1	2	0.2		cog0268 cog2094	2	1	0.1		cog0327 cog1579 cog1519	3	1	0.1		cog0328 cog0079 cog0494 cog0749	4	1	0.1
cog1211	1	2	0.2		cog0271 cog1014	2	1	0.1		cog0327 cog1995 cog2857	3	1	0.1		cog0328 cog0665 cog0568 cog0266	4	1	0.1
cog1225	1	2	0.2		cog0271 cog1052	2	1	0.1		cog0327 cog3481 cog1797	3	1	0.1		cog0328 cog1174 cog2755 cog1434	4	1	0.1
cog1228	1	2	0.2		cog0271 cog2084	2	1	0.1		cog0328 cog0008 cog0457	3	1	0.1		cog0328 cog1293 cog0655 cog0525	4	1	0.1
cog1290	1	2	0.2		cog0272 cog0481	2	1	0.1		cog0328 cog0079 cog0494	3	1	0.1		cog0329 cog4720 cog0477 cog3859	4	1	0.1
cog1293	1	2	0.2		cog0272 cog0572	2	1	0.1		cog0328 cog0665 cog0568	3	1	0.1		cog0330 cog1216 cog2216 cog0040	4	1	0.1
cog1306	1	2	0.2		cog0295 cog4932	2	1	0.1		cog0328 cog1174 cog2755	3	1	0.1		cog0335 cog0336 cog0767 cog0766	4	1	0.1
cog1312	1	2	0.2		cog0319 cog1159	2	1	0.1		cog0328 cog1293 cog0655	3	1	0.1		cog0335 cog0336 cog0806 cog0699	4	1	0.1
cog1322	1	2	0.2		cog0319 cog1882	2	1	0.1		cog0329 cog4720 cog0477	3	1	0.1		cog0335 cog1671 cog0428 cog0052	4	1	0.1
cog1348	1	2	0.2		cog0323 cog0327	2	1	0.1		cog0330 cog1216 cog2216	3	1	0.1		cog0336 cog0767 cog0766 cog0228	4	1	0.1
cog1354	1	2	0.2		cog0324 cog1917	2	1	0.1		cog0335 cog0336 cog0767	3	1	0.1		cog0336 cog0806 cog0699 cog0695	4	1	0.1
cog1366	1	2	0.2		cog0327 cog0115	2	1	0.1		cog0335 cog0336 cog0806	3	1	0.1		cog0336 cog1354 cog0727 cog0720	4	1	0.1
cog1381	1	2	0.2		cog0327 cog0125	2	1	0.1		cog0335 cog1671 cog0428	3	1	0.1		cog0344 cog0694 cog0648 cog0513	4	1	0.1
cog1386	1	2	0.2		cog0327 cog0327	2	1	0.1		cog0336 cog0767 cog0766	3	1	0.1		cog0344 cog1196 cog2905 cog0240	4	1	0.1
cog1387	1	2	0.2		cog0327 cog0597	2	1	0.1		cog0336 cog0806 cog0699	3	1	0.1		cog0346 cog3246 cog1940 cog2319	4	1	0.1
cog1423	1	2	0.2		cog0327 cog1194	2	1	0.1		cog0336 cog1354 cog0727	3	1	0.1		cog0346 cog3823 cog0769 cog0607	4	1	0.1
cog1426	1	2	0.2		cog0327 cog1995	2	1	0.1		cog0344 cog0694 cog0648	3	1	0.1		cog0351 cog0336 cog1354 cog0727	4	1	0.1
cog1430	1	2	0.2		cog0327 cog3481	2	1	0.1		cog0344 cog1196 cog2905	3	1	0.1		cog0351 cog1058 cog0443 cog1249	4	1	0.1
cog1432	1	2	0.2		cog0328 cog0008	2	1	0.1		cog0346 cog3246 cog1940	3	1	0.1		cog0351 cog3725 cog1524 cog4948	4	1	0.1
cog1434	1	2	0.2		cog0328 cog0079	2	1	0.1		cog0346 cog3823 cog0769	3	1	0.1		cog0352 cog0110 cog0079 cog0406	4	1	0.1
cog1496	1	2	0.2		cog0328 cog0665	2	1	0.1		cog0351 cog0336 cog1354	3	1	0.1		cog0352 cog0351 cog0336 cog1354	4	1	0.1
cog1509	1	2	0.2		cog0328 cog1174	2	1	0.1		cog0351 cog1058 cog0443	3	1	0.1		cog0358 cog0327 cog0115 cog2309	4	1	0.1
cog1523	1	2	0.2		cog0328 cog1293	2	1	0.1		cog0351 cog3725 cog1524	3	1	0.1		cog0358 cog0423 cog2384 cog1381	4	1	0.1
cog1524	1	2	0.2		cog0329 cog4720	2	1	0.1		cog0352 cog0110 cog0079	3	1	0.1		cog0358 cog0648 cog0542 cog1671	4	1	0.1
cog1606	1	2	0.2		cog0330 cog1216	2	1	0.1		cog0352 cog0351 cog0336	3	1	0.1		cog0358 cog0661 cog0441 cog0272	4	1	0.1
cog1672	1	2	0.2		cog0335 cog1671	2	1	0.1		cog0358 cog0327 cog0115	3	1	0.1		cog0358 cog0752 cog1519 cog2195	4	1	0.1
cog1697	1	2	0.2		cog0336 cog0767	2	1	0.1		cog0358 cog0423 cog2384	3	1	0.1		cog0358 cog3935 cog1209 cog1898	4	1	0.1
cog1763	1	2	0.2		cog0336 cog0806	2	1	0.1		cog0358 cog0648 cog0542	3	1	0.1		cog0363 cog1600 cog1378 cog0747	4	1	0.1
cog1793	1	2	0.2		cog0336 cog1354	2	1	0.1		cog0358 cog0661 cog0441	3	1	0.1		cog0364 cog1028 cog4608 cog1533	4	1	0.1
cog1796	1	2	0.2		cog0344 cog0694	2	1	0.1		cog0358 cog0752 cog1519	3	1	0.1		cog0390 cog0327 cog1194 cog1164	4	1	0.1
cog1833	1	2	0.2		cog0344 cog1196	2	1	0.1		cog0358 cog3935 cog1209	3	1	0.1		cog0392 cog0438 cog1820 cog0840	4	1	0.1
cog1853	1	2	0.2		cog0346 cog3246	2	1	0.1		cog0363 cog1600 cog1378	3	1	0.1		cog0395 cog0557 cog1653 cog2971	4	1	0.1
cog1873	1	2	0.2		cog0346 cog3823	2	1	0.1		cog0364 cog1028 cog4608	3	1	0.1		cog0406 cog0327 cog0568 cog1191	4	1	0.1
cog1896	1	2	0.2		cog0351 cog0336	2	1	0.1		cog0390 cog0327 cog1194	3	1	0.1		cog0406 cog0328 cog0079 cog0494	4	1	0.1
cog1899	1	2	0.2		cog0351 cog1058	2	1	0.1		cog0392 cog0438 cog1820	3	1	0.1		cog0406 cog0328 cog0665 cog0568	4	1	0.1
cog1925	1	2	0.2		cog0351 cog3725	2	1	0.1		cog0395 cog0557 cog1653	3	1	0.1		cog0415 cog0240 cog3272 cog1897	4	1	0.1
cog1934	1	2	0.2		cog0352 cog0110	2	1	0.1		cog0406 cog0327 cog0568	3	1	0.1		cog0423 cog0415 cog0240 cog3272	4	1	0.1
cog1962	1	2	0.2		cog0352 cog0351	2	1	0.1		cog0406 cog0328 cog0079	3	1	0.1		cog0423 cog2384 cog1381 cog0319	4	1	0.1
cog1970	1	2	0.2		cog0358 cog0327	2	1	0.1		cog0406 cog0328 cog0665	3	1	0.1		cog0426 cog0327 cog0568 cog0358	4	1	0.1
cog1982	1	2	0.2		cog0358 cog0423	2	1	0.1		cog0415 cog0240 cog3272	3	1	0.1		cog0428 cog0052 cog1806 cog1227	4	1	0.1
cog2016	1	2	0.2		cog0358 cog0648	2	1	0.1		cog0423 cog0415 cog0240	3	1	0.1		cog0428 cog0513 cog0648 cog1806	4	1	0.1
cog2060	1	2	0.2		cog0358 cog0661	2	1	0.1		cog0423 cog2384 cog1381	3	1	0.1		cog0428 cog1806 cog2010 cog0503	4	1	0.1
cog2094	1	2	0.2		cog0358 cog0752	2	1	0.1		cog0426 cog0327 cog0568	3	1	0.1		cog0436 cog0390 cog0327 cog1194	4	1	0.1
cog2156	1	2	0.2		cog0358 cog3935	2	1	0.1		cog0428 cog0052 cog1806	3	1	0.1		cog0438 cog0141 cog2911 cog2819	4	1	0.1
cog2197	1	2	0.2		cog0363 cog1600	2	1	0.1		cog0428 cog0513 cog0648	3	1	0.1		cog0438 cog1820 cog0840 cog0426	4	1	0.1
cog2205	1	2	0.2		cog0364 cog1028	2	1	0.1		cog0428 cog1806 cog2010	3	1	0.1		cog0441 cog0272 cog0572 cog0232	4	1	0.1
cog2211	1	2	0.2		cog0390 cog0327	2	1	0.1		cog0436 cog0390 cog0327	3	1	0.1		cog0441 cog0542 cog0572 cog0232	4	1	0.1
cog2216	1	2	0.2		cog0392 cog0438	2	1	0.1		cog0438 cog0141 cog2911	3	1	0.1		cog0443 cog1249 cog4948 cog2333	4	1	0.1
cog2220	1	2	0.2		cog0395 cog0557	2	1	0.1		cog0438 cog1820 cog0840	3	1	0.1		cog0444 cog3429 cog0363 cog1600	4	1	0.1
cog2266	1	2	0.2		cog0406 cog0327	2	1	0.1		cog0441 cog0272 cog0572	3	1	0.1		cog0451 cog0658 cog0454 cog1165	4	1	0.1
cog2270	1	2	0.2		cog0415 cog0240	2	1	0.1		cog0441 cog0542 cog0572	3	1	0.1		cog0452 cog0036 cog1104 cog1396	4	1	0.1
cog2314	1	2	0.2		cog0423 cog0415	2	1	0.1		cog0443 cog1249 cog4948	3	1	0.1		cog0452 cog2197 cog0548 cog2156	4	1	0.1
cog2755	1	2	0.2		cog0423 cog2384	2	1	0.1		cog0444 cog3429 cog0363	3	1	0.1		cog0454 cog1124 cog2382 cog2211	4	1	0.1
cog2857	1	2	0.2		cog0426 cog0327	2	1	0.1		cog0451 cog0658 cog0454	3	1	0.1		cog0454 cog1165 cog0553 cog1169	4	1	0.1
cog2873	1	2	0.2		cog0428 cog0052	2	1	0.1		cog0452 cog0036 cog1104	3	1	0.1		cog0457 cog0215 cog0327 cog1579	4	1	0.1
cog2890	1	2	0.2		cog0428 cog0513	2	1	0.1		cog0452 cog2197 cog0548	3	1	0.1		cog0457 cog0323 cog0327 cog2384	4	1	0.1
cog2893	1	2	0.2		cog0428 cog1806	2	1	0.1		cog0454 cog1124 cog2382	3	1	0.1		cog0457 cog0596 cog0205 cog2270	4	1	0.1
cog2896	1	2	0.2		cog0436 cog0390	2	1	0.1		cog0454 cog1165 cog0553	3	1	0.1		cog0457 cog1225 cog0327 cog2384	4	1	0.1
cog2957	1	2	0.2		cog0438 cog0141	2	1	0.1		cog0457 cog0215 cog0327	3	1	0.1		cog0457 cog1995 cog1127 cog1079	4	1	0.1
cog2966	1	2	0.2		cog0438 cog1820	2	1	0.1		cog0457 cog0323 cog0327	3	1	0.1		cog0457 cog2873 cog1578 cog0210	4	1	0.1
cog2969	1	2	0.2		cog0441 cog0272	2	1	0.1		cog0457 cog0596 cog0205	3	1	0.1		cog0461 cog1486 cog0395 cog0557	4	1	0.1
cog3104	1	2	0.2		cog0441 cog0542	2	1	0.1		cog0457 cog1225 cog0327	3	1	0.1		cog0461 cog2220 cog0457 cog1995	4	1	0.1
cog3326	1	2	0.2		cog0443 cog1249	2	1	0.1		cog0457 cog1995 cog1127	3	1	0.1		cog0463 cog0515 cog0517 cog0793	4	1	0.1
cog3467	1	2	0.2		cog0444 cog3429	2	1	0.1		cog0457 cog2873 cog1578	3	1	0.1		cog0463 cog0562 cog0605 cog0327	4	1	0.1
cog3481	1	2	0.2		cog0451 cog0658	2	1	0.1		cog0461 cog1486 cog0395	3	1	0.1		cog0466 cog1354 cog1132 cog0596	4	1	0.1
cog3744	1	2	0.2		cog0452 cog0036	2	1	0.1		cog0461 cog2220 cog0457	3	1	0.1		cog0466 cog3845 cog1463 cog0461	4	1	0.1
cog3937	1	2	0.2		cog0452 cog2197	2	1	0.1		cog0463 cog0515 cog0517	3	1	0.1		cog0468 cog0531 cog1087 cog0639	4	1	0.1
cog4015	1	2	0.2		cog0454 cog1124	2	1	0.1		cog0463 cog0562 cog0605	3	1	0.1		cog0477 cog0625 cog1290 cog0723	4	1	0.1
cog4016	1	2	0.2		cog0454 cog1165	2	1	0.1		cog0466 cog1354 cog1132	3	1	0.1		cog0477 cog3113 cog1080 cog3467	4	1	0.1
cog4017	1	2	0.2		cog0457 cog0215	2	1	0.1		cog0466 cog3845 cog1463	3	1	0.1		cog0477 cog3323 cog3217 cog4826	4	1	0.1
cog4018	1	2	0.2		cog0457 cog0323	2	1	0.1		cog0468 cog0531 cog1087	3	1	0.1		cog0477 cog3859 cog3425 cog1914	4	1	0.1
cog4019	1	2	0.2		cog0457 cog0596	2	1	0.1		cog0477 cog0625 cog1290	3	1	0.1		cog0481 cog1141 cog4720 cog0531	4	1	0.1
cog4054	1	2	0.2		cog0457 cog1225	2	1	0.1		cog0477 cog3113 cog1080	3	1	0.1		cog0481 cog1853 cog0525 cog4912	4	1	0.1
cog4055	1	2	0.2		cog0457 cog1995	2	1	0.1		cog0477 cog3323 cog3217	3	1	0.1		cog0484 cog0272 cog0481 cog1853	4	1	0.1
cog4056	1	2	0.2		cog0457 cog2873	2	1	0.1		cog0477 cog3859 cog3425	3	1	0.1		cog0488 cog4767 cog1011 cog0768	4	1	0.1
cog4057	1	2	0.2		cog0461 cog1486	2	1	0.1		cog0481 cog1141 cog4720	3	1	0.1		cog0491 cog0179 cog1322 cog1793	4	1	0.1
cog4058	1	2	0.2		cog0461 cog2220	2	1	0.1		cog0481 cog1853 cog0525	3	1	0.1		cog0491 cog3133 cog0236 cog1295	4	1	0.1
cog4059	1	2	0.2		cog0463 cog0515	2	1	0.1		cog0484 cog0272 cog0481	3	1	0.1		cog0494 cog0268 cog2094 cog2211	4	1	0.1
cog4060	1	2	0.2		cog0463 cog0562	2	1	0.1		cog0488 cog4767 cog1011	3	1	0.1		cog0494 cog0749 cog0258 cog3744	4	1	0.1
cog4061	1	2	0.2		cog0466 cog1354	2	1	0.1		cog0491 cog0179 cog1322	3	1	0.1		cog0494 cog1108 cog1312 cog1853	4	1	0.1
cog4062	1	2	0.2		cog0466 cog3845	2	1	0.1		cog0491 cog3133 cog0236	3	1	0.1		cog0494 cog1430 cog0177 cog1196	4	1	0.1
cog4063	1	2	0.2		cog0468 cog0531	2	1	0.1		cog0494 cog0268 cog2094	3	1	0.1		cog0500 cog0541 cog0335 cog0336	4	1	0.1
cog4064	1	2	0.2		cog0477 cog0625	2	1	0.1		cog0494 cog0749 cog0258	3	1	0.1		cog0500 cog1496 cog1934 cog1523	4	1	0.1
cog4065	1	2	0.2		cog0477 cog3113	2	1	0.1		cog0494 cog1108 cog1312	3	1	0.1		cog0500 cog5212 cog0767 cog0766	4	1	0.1
cog4074	1	2	0.2		cog0477 cog3323	2	1	0.1		cog0494 cog1430 cog0177	3	1	0.1		cog0503 cog0655 cog1683 cog0335	4	1	0.1
cog4085	1	2	0.2		cog0477 cog3859	2	1	0.1		cog0500 cog0541 cog0335	3	1	0.1		cog0503 cog0751 cog0752 cog1227	4	1	0.1
cog4118	1	2	0.2		cog0481 cog1141	2	1	0.1		cog0500 cog1496 cog1934	3	1	0.1		cog0503 cog1108 cog0661 cog1159	4	1	0.1
cog4218	1	2	0.2		cog0481 cog1853	2	1	0.1		cog0500 cog5212 cog0767	3	1	0.1		cog0513 cog0358 cog0648 cog0542	4	1	0.1
cog4347	1	2	0.2		cog0484 cog0272	2	1	0.1		cog0503 cog0655 cog1683	3	1	0.1		cog0513 cog0539 cog3228 cog2120	4	1	0.1
cog4508	1	2	0.2		cog0488 cog4767	2	1	0.1		cog0503 cog0751 cog0752	3	1	0.1		cog0513 cog0648 cog1806 cog1088	4	1	0.1
cog4720	1	2	0.2		cog0491 cog0179	2	1	0.1		cog0503 cog1108 cog0661	3	1	0.1		cog0513 cog0699 cog0503 cog0655	4	1	0.1
cog4912	1	2	0.2		cog0491 cog3133	2	1	0.1		cog0513 cog0358 cog0648	3	1	0.1		cog0513 cog1284 cog0541 cog0162	4	1	0.1
cog4948	1	2	0.2		cog0494 cog0268	2	1	0.1		cog0513 cog0539 cog3228	3	1	0.1		cog0515 cog0517 cog0793 cog0457	4	1	0.1
cog5007	1	2	0.2		cog0494 cog0749	2	1	0.1		cog0513 cog0648 cog1806	3	1	0.1		cog0517 cog0793 cog0457 cog1225	4	1	0.1
cog5124	1	2	0.2		cog0494 cog1108	2	1	0.1		cog0513 cog0699 cog0503	3	1	0.1		cog0520 cog0647 cog0607 cog2267	4	1	0.1
cog5212	1	2	0.2		cog0494 cog1430	2	1	0.1		cog0513 cog1284 cog0541	3	1	0.1		cog0525 cog2094 cog1173 cog0826	4	1	0.1
cog5431	1	2	0.2		cog0500 cog0541	2	1	0.1		cog0515 cog0517 cog0793	3	1	0.1		cog0525 cog3842 cog0739 cog0037	4	1	0.1
cog5542	1	2	0.2		cog0500 cog1496	2	1	0.1		cog0517 cog0793 cog0457	3	1	0.1		cog0525 cog4912 cog0527 cog0735	4	1	0.1
cog0016	1	1	0.1		cog0500 cog5212	2	1	0.1		cog0520 cog0647 cog0607	3	1	0.1		cog0526 cog0457 cog0596 cog0205	4	1	0.1
cog0033	1	1	0.1		cog0503 cog0655	2	1	0.1		cog0525 cog2094 cog1173	3	1	0.1		cog0527 cog0735 cog1702 cog1385	4	1	0.1
cog0036	1	1	0.1		cog0503 cog0751	2	1	0.1		cog0525 cog3842 cog0739	3	1	0.1		cog0531 cog1087 cog0463 cog0515	4	1	0.1
cog0037	1	1	0.1		cog0503 cog1108	2	1	0.1		cog0525 cog4912 cog0527	3	1	0.1		cog0531 cog1087 cog0639 cog4347	4	1	0.1
cog0075	1	1	0.1		cog0513 cog0358	2	1	0.1		cog0526 cog0457 cog0596	3	1	0.1		cog0531 cog1322 cog1793 cog2216	4	1	0.1
cog0130	1	1	0.1		cog0513 cog0539	2	1	0.1		cog0527 cog0735 cog1702	3	1	0.1		cog0531 cog3467 cog0685 cog1134	4	1	0.1
cog0136	1	1	0.1		cog0513 cog0648	2	1	0.1		cog0531 cog1087 cog0463	3	1	0.1		cog0539 cog3228 cog2120 cog2304	4	1	0.1
cog0145	1	1	0.1		cog0513 cog0699	2	1	0.1		cog0531 cog1087 cog0639	3	1	0.1		cog0541 cog0162 cog0264 cog0052	4	1	0.1
cog0146	1	1	0.1		cog0513 cog1284	2	1	0.1		cog0531 cog1322 cog1793	3	1	0.1		cog0541 cog0228 cog1837 cog0335	4	1	0.1
cog0152	1	1	0.1		cog0515 cog0517	2	1	0.1		cog0531 cog3467 cog0685	3	1	0.1		cog0541 cog0335 cog0336 cog0767	4	1	0.1
cog0157	1	1	0.1		cog0517 cog0793	2	1	0.1		cog0539 cog3228 cog2120	3	1	0.1		cog0541 cog3817 cog3819 cog0682	4	1	0.1
cog0162	1	1	0.1		cog0520 cog0647	2	1	0.1		cog0541 cog0162 cog0264	3	1	0.1		cog0542 cog0572 cog0232 cog1293	4	1	0.1
cog0173	1	1	0.1		cog0525 cog2094	2	1	0.1		cog0541 cog0228 cog1837	3	1	0.1		cog0542 cog1671 cog0428 cog1806	4	1	0.1
cog0178	1	1	0.1		cog0525 cog3842	2	1	0.1		cog0541 cog0335 cog0336	3	1	0.1		cog0544 cog0352 cog0351 cog0336	4	1	0.1
cog0179	1	1	0.1		cog0525 cog4912	2	1	0.1		cog0541 cog3817 cog3819	3	1	0.1		cog0544 cog0466 cog1354 cog1132	4	1	0.1
cog0183	1	1	0.1		cog0526 cog0457	2	1	0.1		cog0542 cog0572 cog0232	3	1	0.1		cog0548 cog2156 cog0210 cog0756	4	1	0.1
cog0205	1	1	0.1		cog0527 cog0735	2	1	0.1		cog0542 cog1671 cog0428	3	1	0.1		cog0553 cog1169 cog1426 cog0351	4	1	0.1
cog0206	1	1	0.1		cog0531 cog1322	2	1	0.1		cog0544 cog0352 cog0351	3	1	0.1		cog0553 cog1169 cog2315 cog3481	4	1	0.1
cog0249	1	1	0.1		cog0531 cog3467	2	1	0.1		cog0544 cog0466 cog1354	3	1	0.1		cog0557 cog1653 cog2971 cog0520	4	1	0.1
cog0268	1	1	0.1		cog0539 cog3228	2	1	0.1		cog0548 cog2156 cog0210	3	1	0.1		cog0558 cog0605 cog1606 cog0601	4	1	0.1
cog0295	1	1	0.1		cog0541 cog0162	2	1	0.1		cog0553 cog1169 cog1426	3	1	0.1		cog0562 cog0605 cog0327 cog0597	4	1	0.1
cog0323	1	1	0.1		cog0541 cog0228	2	1	0.1		cog0553 cog1169 cog2315	3	1	0.1		cog0563 cog1555 cog0558 cog0605	4	1	0.1
cog0324	1	1	0.1		cog0541 cog0335	2	1	0.1		cog0557 cog1653 cog2971	3	1	0.1		cog0564 cog0079 cog3935 cog0423	4	1	0.1
cog0329	1	1	0.1		cog0541 cog3817	2	1	0.1		cog0558 cog0605 cog1606	3	1	0.1		cog0564 cog0327 cog0125 cog1430	4	1	0.1
cog0330	1	1	0.1		cog0542 cog0572	2	1	0.1		cog0562 cog0605 cog0327	3	1	0.1		cog0564 cog0682 cog0240 cog0778	4	1	0.1
cog0363	1	1	0.1		cog0542 cog1671	2	1	0.1		cog0563 cog1555 cog0558	3	1	0.1		cog0564 cog0752 cog0240 cog0778	4	1	0.1
cog0364	1	1	0.1		cog0544 cog0352	2	1	0.1		cog0564 cog0079 cog3935	3	1	0.1		cog0568 cog0266 cog1194 cog0358	4	1	0.1
cog0390	1	1	0.1		cog0544 cog0466	2	1	0.1		cog0564 cog0327 cog0125	3	1	0.1		cog0568 cog0358 cog0423 cog2384	4	1	0.1
cog0392	1	1	0.1		cog0548 cog2156	2	1	0.1		cog0564 cog0682 cog0240	3	1	0.1		cog0568 cog0358 cog0661 cog0441	4	1	0.1
cog0395	1	1	0.1		cog0557 cog1653	2	1	0.1		cog0564 cog0752 cog0240	3	1	0.1		cog0568 cog0358 cog3935 cog1209	4	1	0.1
cog0426	1	1	0.1		cog0558 cog0605	2	1	0.1		cog0568 cog0266 cog1194	3	1	0.1		cog0568 cog1191 cog0760 cog0358	4	1	0.1
cog0436	1	1	0.1		cog0562 cog0605	2	1	0.1		cog0568 cog0358 cog0423	3	1	0.1		cog0568 cog1897 cog0513 cog0358	4	1	0.1
cog0443	1	1	0.1		cog0563 cog1555	2	1	0.1		cog0568 cog0358 cog0661	3	1	0.1		cog0568 cog4542 cog0352 cog0110	4	1	0.1
cog0444	1	1	0.1		cog0564 cog0079	2	1	0.1		cog0568 cog0358 cog3935	3	1	0.1		cog0572 cog0232 cog1293 cog0328	4	1	0.1
cog0451	1	1	0.1		cog0564 cog0327	2	1	0.1		cog0568 cog1191 cog0760	3	1	0.1		cog0572 cog0232 cog3937 cog0328	4	1	0.1
cog0468	1	1	0.1		cog0564 cog0682	2	1	0.1		cog0568 cog1897 cog0513	3	1	0.1		cog0576 cog2131 cog2270 cog1247	4	1	0.1
cog0484	1	1	0.1		cog0564 cog0752	2	1	0.1		cog0568 cog4542 cog0352	3	1	0.1		cog0577 cog0102 cog0103 cog1982	4	1	0.1
cog0488	1	1	0.1		cog0568 cog0266	2	1	0.1		cog0572 cog0232 cog1293	3	1	0.1		cog0582 cog1109 cog0577 cog0102	4	1	0.1
cog0515	1	1	0.1		cog0568 cog1191	2	1	0.1		cog0572 cog0232 cog3937	3	1	0.1		cog0582 cog3104 cog0330 cog1216	4	1	0.1
cog0517	1	1	0.1		cog0568 cog1897	2	1	0.1		cog0576 cog2131 cog2270	3	1	0.1		cog0583 cog0271 cog1052 cog3104	4	1	0.1
cog0520	1	1	0.1		cog0568 cog4542	2	1	0.1		cog0577 cog0102 cog0103	3	1	0.1		cog0583 cog2969 cog3039 cog2197	4	1	0.1
cog0526	1	1	0.1		cog0576 cog2131	2	1	0.1		cog0582 cog1109 cog0577	3	1	0.1		cog0591 cog2378 cog0145 cog1028	4	1	0.1
cog0527	1	1	0.1		cog0577 cog0102	2	1	0.1		cog0582 cog3104 cog0330	3	1	0.1		cog0595 cog0812 cog1124 cog0818	4	1	0.1
cog0539	1	1	0.1		cog0582 cog1109	2	1	0.1		cog0583 cog0271 cog1052	3	1	0.1		cog0596 cog0205 cog2270 cog0173	4	1	0.1
cog0548	1	1	0.1		cog0582 cog3104	2	1	0.1		cog0583 cog2969 cog3039	3	1	0.1		cog0596 cog0454 cog1124 cog2382	4	1	0.1
cog0557	1	1	0.1		cog0583 cog0271	2	1	0.1		cog0591 cog2378 cog0145	3	1	0.1		cog0596 cog0595 cog0812 cog1124	4	1	0.1
cog0558	1	1	0.1		cog0583 cog2969	2	1	0.1		cog0595 cog0812 cog1124	3	1	0.1		cog0596 cog1165 cog1434 cog0553	4	1	0.1
cog0562	1	1	0.1		cog0591 cog2378	2	1	0.1		cog0596 cog0205 cog2270	3	1	0.1		cog0596 cog4508 cog0225 cog0206	4	1	0.1
cog0563	1	1	0.1		cog0595 cog0812	2	1	0.1		cog0596 cog0454 cog1124	3	1	0.1		cog0597 cog0761 cog0264 cog0258	4	1	0.1
cog0576	1	1	0.1		cog0596 cog0205	2	1	0.1		cog0596 cog0595 cog0812	3	1	0.1		cog0597 cog1137 cog1496 cog1692	4	1	0.1
cog0577	1	1	0.1		cog0596 cog0454	2	1	0.1		cog0596 cog1165 cog1434	3	1	0.1		cog0601 cog0364 cog1028 cog4608	4	1	0.1
cog0591	1	1	0.1		cog0596 cog0595	2	1	0.1		cog0596 cog4508 cog0225	3	1	0.1		cog0601 cog0641 cog0596 cog0454	4	1	0.1
cog0595	1	1	0.1		cog0596 cog1165	2	1	0.1		cog0597 cog0761 cog0264	3	1	0.1		cog0601 cog0793 cog1028 cog1692	4	1	0.1
cog0617	1	1	0.1		cog0596 cog4508	2	1	0.1		cog0597 cog1137 cog1496	3	1	0.1		cog0603 cog0040 cog1028 cog0695	4	1	0.1
cog0620	1	1	0.1		cog0597 cog0761	2	1	0.1		cog0601 cog0364 cog1028	3	1	0.1		cog0603 cog1388 cog2220 cog0009	4	1	0.1
cog0635	1	1	0.1		cog0597 cog1137	2	1	0.1		cog0601 cog0641 cog0596	3	1	0.1		cog0605 cog0327 cog0597 cog1137	4	1	0.1
cog0641	1	1	0.1		cog0601 cog0364	2	1	0.1		cog0601 cog0793 cog1028	3	1	0.1		cog0605 cog1606 cog0601 cog0793	4	1	0.1
cog0645	1	1	0.1		cog0601 cog0641	2	1	0.1		cog0603 cog0040 cog1028	3	1	0.1		cog0607 cog1837 cog1121 cog1539	4	1	0.1
cog0647	1	1	0.1		cog0601 cog0793	2	1	0.1		cog0603 cog1388 cog2220	3	1	0.1		cog0607 cog2267 cog0327 cog1579	4	1	0.1
cog0656	1	1	0.1		cog0603 cog0040	2	1	0.1		cog0605 cog0327 cog0597	3	1	0.1		cog0607 cog3631 cog0225 cog1060	4	1	0.1
cog0658	1	1	0.1		cog0603 cog1388	2	1	0.1		cog0605 cog1606 cog0601	3	1	0.1		cog0612 cog1524 cog0484 cog0272	4	1	0.1
cog0666	1	1	0.1		cog0605 cog0327	2	1	0.1		cog0607 cog1837 cog1121	3	1	0.1		cog0612 cog3387 cog0444 cog3429	4	1	0.1
cog0673	1	1	0.1		cog0605 cog1606	2	1	0.1		cog0607 cog2267 cog0327	3	1	0.1		cog0617 cog1682 cog0271 cog2084	4	1	0.1
cog0685	1	1	0.1		cog0607 cog1837	2	1	0.1		cog0607 cog3631 cog0225	3	1	0.1		cog0620 cog1160 cog1063 cog0346	4	1	0.1
cog0691	1	1	0.1		cog0607 cog2267	2	1	0.1		cog0612 cog1524 cog0484	3	1	0.1		cog0625 cog0245 cog1290 cog0723	4	1	0.1
cog0693	1	1	0.1		cog0607 cog3631	2	1	0.1		cog0612 cog3387 cog0444	3	1	0.1		cog0625 cog1290 cog0723 cog0102	4	1	0.1
cog0694	1	1	0.1		cog0612 cog1524	2	1	0.1		cog0617 cog1682 cog0271	3	1	0.1		cog0626 cog0146 cog2229 cog0477	4	1	0.1
[truncated: 533 more rows]

## Sheet: c.2
https://seoscout.com/tools/keyword-analyzer					COG0327 - COGs only	Organized by Uses/Uses (%)
[truncated: 2,642 more rows]

[truncated: 5 more sheets: c.3, d.1, d.2, e.1, e.2]
