# Supplementary material for: Comparative Genomic Analysis of the DUF34 Protein Family Suggests Role as a Metal Ion Chaperone or Insertase
Source: Preprints.org preprint supplement (doi:10.20944/preprints202107.0280.v1), 2021-07-13
Supplement: Supplementary file 11 [file Data Table 8.xlsx]

## Sheet: Content
Data Table 8		Reed et al., 2021
a	PDB annotation data across metal ligands, PDB 2020 (13 metal ions, 2 forms of bound Fe), used to generate Figure S8
b	metal-binding protein abundance across representative operons, determined for each ion relative to all representative operon-encoded proteins (per superkingdom) (Figure S9, Figure S10); compared to relative abundances in PDB
c	individual protein counts per distinct ion listed as a function of individual representative operons (cells formatted to simulate a heat map, 0 [min] to 5 [max])

## Sheet: a
Exported per metal from MetalWeb (MetalPDB; http://metalpdb.cerm.unifi.it)
Metal	Abundance	Metal	Fraction of all metal-containing structures	Metal	of all structures in PDB
Co	364	Co	0.0282872	Co	0.00209754
Cu	286	Cu	0.0222257	Cu	0.00164806
Zn	2745	Zn	0.21332	Zn	0.015818
Cd	550	Cd	0.0427417	Cd	0.00316935
Mn	790	Mn	0.0613926	Mn	0.00455234
Fe (ion)	340	Fe (ion)	0.0264221	Fe (ion)	0.00195924
Fe (heme)	217	Fe (heme)	0.0168635	Fe (heme)	0.00125045
Fe (Fe-S cluster)	230	Fe (Fe-S cluster)	0.0178738	Fe (Fe-S cluster)	0.00132537
Mg	3979	Mg	0.309217	Mg	0.0229288
Ni	569	Ni	0.0442182	Ni	0.00327884
Ca	2650	Ca	0.205937	Ca	0.0152705
Mo	46	Mo	0.00357476	Mo	0.000265073
Ag	23	Ag	0.00178738	Ag	0.000132537
Sr	63	Sr	0.00489587	Sr	0.000363035
Pb	16	Pb	0.00124339	Pb	9.21994e-05
	12868
Total proteins in PDB	173537
as of 1/15/2021

## Sheet: b
For generation of Figure S9					Representative Operons			Abundance Relative to Total Number of Operon-encoded Proteins				Relative Abundance of Metals Among Operon-encoded Proteins vs. that in PDB Structures				For generation of Figure S10
		Count Across Operons			Total Number of Operon-encoded proteins				(relative to total proteins across operons)				Abundance Relative to Total Structures with Any Metal	Relative Abundance (across operons)		Relative Abundance of Metals in Operon-encoded Proteins vs. Relative Abundance of Metal-bound Structures Across All PDB Entries (with or without metals)
Metal	PDB	All	Bacteria	Archaea	Bacteria	Archaea	All	Metal	Bacteria	Archaea	All (Arch+Bact)	Metal	PDB	Bacteria	Archaea	Metal	PDB	Bacteria	Archaea
Co	364	14	11	3	189	33	222	Co	0.0582011	0.0909091	0.0630631	Co	0.0282872	0.0582011	0.0909091	Co	0.00209754	0.0582011	0.0909091
Cu	286	6	6	0				Cu	0.031746	0	0.027027	Cu	0.0222257	0.031746	0	Cu	0.00164806	0.031746	0
Zn	2745	39	30	9				Zn	0.15873	0.272727	0.175676	Zn	0.21332	0.15873	0.272727	Zn	0.015818	0.15873	0.272727
Cd	550	3	3	0				Cd	0.015873	0	0.0135135	Cd	0.0427417	0.015873	0	Cd	0.00316935	0.015873	0
Mn	790	34	33	1				Mn	0.174603	0.030303	0.153153	Mn	0.0613926	0.174603	0.030303	Mn	0.00455234	0.174603	0.030303
Fe (ion)	340	15	12	3				Fe (ion)	0.0634921	0.0909091	0.0675676	Fe (ion)	0.0264221	0.0634921	0.0909091	Fe (ion)	0.00195924	0.0634921	0.0909091
Fe (heme)	217	1	1	0				Fe (heme)	0.00529101	0	0.0045045	Fe (heme)	0.0168635	0.00529101	0	Fe (heme)	0.00125045	0.00529101	0
Fe (Fe-S cluster)	230	8	6	2				Fe (Fe-S cluster)	0.031746	0.0606061	0.036036	Fe (Fe-S cluster)	0.0178738	0.031746	0.0606061	Fe (Fe-S cluster)	0.00132537	0.031746	0.0606061
Mg	3979	57	50	7				Mg	0.26455	0.212121	0.256757	Mg	0.309217	0.26455	0.212121	Mg	0.0229288	0.26455	0.212121
Ni	569	12	9	3				Ni	0.047619	0.0909091	0.0540541	Ni	0.0442182	0.047619	0.0909091	Ni	0.00327884	0.047619	0.0909091
Ca	2650	9	9	0				Ca	0.047619	0	0.0405405	Ca	0.205937	0.047619	0	Ca	0.0152705	0.047619	0
Mo	46	0	0	0				Mo	0	0	0	Mo	0.00357476	0	0	Mo	0.000265073	0	0
Ag	23	3	3	0				Ag	0.015873	0	0.0135135	Ag	0.00178738	0.015873	0	Ag	0.000132537	0.015873	0
Sr	63	1	1	0				Sr	0.00529101	0	0.0045045	Sr	0.00489587	0.00529101	0	Sr	0.000363035	0.00529101	0
Pb	16	1	1	0				Pb	0.00529101	0	0.0045045	Pb	0.00124339	0.00529101	0	Pb	9.21994e-05	0.00529101	0
Se	0	1	0	1
All/Any Metals	12868	204	175	29

## Sheet: c
Total (Bacteria + Archaea)		14	6	39	3	34	15	1	8	57	12	9	0	3	1	1	1
Bacteria		11	6	30	3	33	12	1	6	50	9	9	0	3	1	1	0
Archaea		3	0	9	0	1	3	0	2	7	3	0	0	0	0	0	1
Superkingdom	Organism	Co	Cu	Zn	Cd	Mn	Fe (ion)	Fe (heme)	Fe (Fe-S cluster)	Mg	Ni	Ca	Mo	Ag	Sr	Pb	Se
Bacteria	Corynebacterium diphtheriae gravis NCTC 13129 (BX248358.1; CAE50209.1)	1	0	1	0	1	0	0	0	1	1	0	0	0	0	0	0
Bacteria	Mycobacterium tuberculosis H37Rv (AL123456.3; CCP45008.1)	1	0	1	0	2	0	0	0	2	1	0	0	0	0	0	0
Bacteria	Porphyromonas gingivalis W83 (AE015924.1; AAQ67008.1)	0	0	1	0	0	0	0	0	0	0	0	0	0	0	0	0
Bacteria	Bacteroides fragilis 638R (FQ312004.1; CBW22942.1)	0	0	1	0	0	0	0	0	0	0	0	0	0	0	0	0
Bacteria	Flavobacterium indicum GPTSA100-9 (HE774682.1; CCG54061.1)	0	0	1	0	0	0	0	0	0	0	0	0	0	0	0	0
Bacteria	Croceibacter atlanticus HTCC2559 (CP002046.1; EAP85927.1)	0	0	1	0	0	0	0	0	0	0	0	0	0	0	0	0
Bacteria	Chlamydia pneumoniae CWL029	0	0	0	0	0	0	0	0	0	0	0	0	0	0	0	0
Bacteria	Chlamydia trachomatis D/UW-3/CX (AE001273.1; AAC67699.1)	0	0	0	0	0	0	0	1	0	0	0	0	0	0	0	0
Bacteria	Desulfurispirillum indicum S5 (CP002432.1; ADU64784.1)	0	2	0	0	1	2	0	0	2	0	0	0	2	1	1	0
Bacteria	1. Chroococcidiopsis thermalis PCC 7203 (CP003597.1; AFY88644.1)	0	0	0	0	0	0	0	0	0	0	0	0	0	0	0	0
Bacteria	2. Chroococcidiopsis thermalis PCC 7203 (CP003597.1; AFY90938.1)	0	0	0	0	0	0	0	0	0	0	0	0	0	0	0	0
Bacteria	1. Deinococcus maricopensis DSM 21211 (CP002454.1; ADV68024.1)	0	0	0	0	0	0	0	1	0	0	0	0	0	0	0	0
Bacteria	2. Deinococcus maricopensis DSM 21211 (CP002454.1; ADV67360.1)	1	0	1	1	1	1	0	0	2	1	1	0	0	0	0	0
Bacteria	1. Deinococcus radiodurans R1 (AE000513.1; AAF09697.1)	1	0	1	1	1	1	0	0	2	1	1	0	0	0	0	0
Bacteria	2. Deinococcus radiodurans R1 (AE000513.1; AAF12010.1)	0	0	0	0	0	0	0	0	1	0	0	0	0	0	0	0
Bacteria	1. Bacillus cereus ATCC 14579 (AE016877.1; AAP11199.1)	0	0	0	0	0	0	0	0	0	0	0	0	0	0	0	0
Bacteria	2. Bacillus cereus ATCC 14579 (; )	0	0	0	0	0	0	0	0	0	0	0	0	0	0	0	0
Bacteria	3. Bacillus cereus ATCC 14579 (; )	0	0	0	0	0	1	0	1	1	0	1	0	0	0	0	0
Bacteria	Staphylococcus aureus subsp. aureus NCTC 8325 (CP000253.1; ABD30735.1)	0	0	0	0	0	0	0	0	0	0	0	0	0	0	0	0
Bacteria	Streptococcus suis BM407 (FM252032.1; CAZ55488.1)	0	0	0	0	0	0	0	0	1	0	0	0	0	0	0	0
Bacteria	Clostridium botulinum A ATCC 3502 (AM412317.1; CAL84497.1)	0	0	0	0	1	0	0	0	1	0	0	0	0	0	0	0
Bacteria	Clostridium difficile R20291 (FN545816.1; CBE03762.1)	0	0	0	0	0	0	0	0	0	0	0	0	0	0	0	0
Bacteria	Acidaminococcus fermentans DSM 20731(CP001859.1; ADB47202.1)	1	0	0	0	1	0	0	0	0	0	0	0	0	0	0	0
Bacteria	Veillonella parvula DSM 2008 (CP001820.1; ACZ24870.1)	0	0	0	0	0	0	0	0	0	0	0	0	0	0	0	0
Bacteria	Ureaplasma parvum serovar 3 ATCC 27815 (CP000942.1; ACA33204.1)	0	0	1	0	1	0	0	0	2	0	1	0	0	0	0	0
Bacteria	Mycoplasma bovis PG45 (CP002188.1; ADR25099.1)	1	0	2	0	2	0	0	0	3	0	0	0	0	0	0	0
Bacteria	Mycoplasma gallisepticum R(low) (AE015450.2; AAP56737.1)	1	1	4	0	2	1	0	1	5	1	0	0	1	0	0	0
Bacteria	Fusobacterium nucleatum subsp. nucleatum ATCC 25586 (AE009951.2; AAL95512.1)	0	0	3	0	1	0	0	0	3	0	0	0	0	0	0	0
Bacteria	Pirellula staleyi DSM 6068 (CP001848.1; ADB15527.1)	0	0	0	0	0	0	0	0	0	0	0	0	0	0	0	0
Bacteria	Burkholderia thailandensis E264 (CP000086.1; ABC37517.1)	0	0	0	0	0	0	0	0	0	0	0	0	0	0	0	0
Bacteria	Neisseria meningitidis MC58 (serogroup C) (AE002098.2; AAF42374.1)	0	0	0	0	0	0	0	0	0	0	0	0	0	0	0	0
Bacteria	Nitrosomonas europea ATCC 19718 (AL954747.1; CAD85420.1)	0	0	0	0	0	0	0	0	0	0	0	0	0	0	0	0
Bacteria	Hippea maritima DSM 10411 (CP002606.1; AEA34208.1)	1	0	1	0	1	0	0	0	2	1	0	0	0	0	0	0
Bacteria	Geobacter sulfurreducens PCA (AE017180.2; AAR36476.2)	0	0	1	0	0	0	0	0	0	0	0	0	0	0	0	0
Bacteria	Desulfovibrio alaskensis G20 (CP000112.1; ABB38526.1)	0	0	2	0	3	0	0	0	3	0	0	0	0	0	0	0
Bacteria	Campylobacter jejuni subsp. jejuni NCTC 11168 = ATCC 700819 (AL111168.1; CAL34842.1)	1	0	1	0	3	0	0	0	5	1	2	0	0	0	0	0
Bacteria	Helicobacter pylori 26695 (AE000511.1; AAD08001.1)	1	0	3	0	3	1	0	0	1	0	0	0	0	0	0	0
Bacteria	Chromohalobacter salexigens DSM 3043 (CP000285.1; ABE59561.1)	0	0	0	0	0	0	0	0	0	0	0	0	0	0	0	0
Bacteria	Pseudomonas putida KT2440 (AE015451.2; AAN66926.1)	0	0	0	0	0	0	0	0	0	0	0	0	0	0	0	0
Bacteria	Escherichia coli str. K-12 MG1655 (AP009048.1; BAA35374.1)	0	1	1	0	4	1	0	0	4	1	1	0	0	0	0	0
Bacteria	Buchnera aphidicola JF99, endosymbiont of Acyrthosiphon pisum (CP002302.1; ADP67274.1)	0	0	0	0	0	0	0	1	0	0	0	0	0	0	0	0
Bacteria	Salmonella enterica subsp. enterica serovar Paratyphi A ATCC 9150 (CP000026.1; AAV77932.1)	0	0	0	0	3	0	0	0	3	0	0	0	0	0	0	0
Bacteria	Vibrio cholerae O1 biovar El Tor N16961 (AE003852.1; AAF95239.1)	0	0	0	0	0	0	0	0	0	0	0	0	0	0	0	0
Bacteria	Legionella pneumophila Paris (CR628336.1; CAH12061.1)	0	0	0	0	0	1	0	1	2	0	0	0	0	0	0	0
Bacteria	Borrelia burgdorferi B31 (AE000783.1; AAC66826.1)	1	1	1	1	1	2	0	0	2	1	1	0	0	0	0	0
Bacteria	Treponema pallidum subsp. pallidum Nichols (AE000520.1; AAC65940.1)	0	0	0	0	0	0	0	0	0	0	0	0	0	0	0	0
Bacteria	Thermodesulfatator indicus DSM 15286 (CP002683.1; AEH43918.1)	0	0	1	0	0	0	0	0	1	0	0	0	0	0	0	0
Bacteria	Kosmotoga olearia TBF 19.5.1 (CP001634.1; ACR79139.1)	0	0	0	0	0	0	0	0	0	0	0	0	0	0	0	0
Bacteria	Coraliomargarita akajimensis DSM 45221 (CP001998.1; ADE55359.1)	0	0	1	0	1	1	1	0	1	0	1	0	0	0	0	0
Bacteria	Opitutus terrae PB90-1 (CP001032.1; ACB76913.1)	0	0	0	0	0	0	0	0	0	0	0	0	0	0	0	0
Bacteria	Akkermansia muciniphila ATCC BAA-835 (CP001071.1; ACD03854.1)	0	1	0	0	0	0	0	0	0	0	0	0	0	0	0	0
Archaea	Pyrobaculum calidifontis JCM 11548 / VA1 (CP000561.1 ; ABO08176.1)	0	0	0	0	0	0	0	0	0	0	0	0	0	0	0	0
Archaea	Archaeoglobus fulgidus DSM 4304 (AE000782.1; AAB89474.1)	0	0	0	0	0	0	0	0	0	0	0	0	0	0	0	0
Archaea	Haloferax volcanii DS2 (CP001956.1; ADE02470.1)	0	0	0	0	0	0	0	0	0	0	0	0	0	0	0	0
Archaea	Methanothermobacter thermautotrophicus DeltaH (AE000666.1; AAB85635.1)	0	0	1	0	0	1	0	1	1	0	0	0	0	0	0	0
Archaea	Methanococcus maripaludis S2 (BX950229.1; CAF29609.1)	0	0	1	0	0	0	0	0	1	0	0	0	0	0	0	0
Archaea	Pyrococcus abyssi GE5 (HE613800.1; CCE70869.1)	1	0	2	0	1	1	0	0	1	1	0	0	0	0	0	0
Archaea	1. Methanospirillum hungatei JF-1 (CP000254.1; ABD39815.1)	2	0	5	0	0	1	0	0	3	2	0	0	0	0	0	1
Archaea	2. Methanospirillum hungatei JF-1 (CP000254.1; ABD40000.1)	0	0	0	0	0	0	0	1	1	0	0	0	0	0	0	0
Archaea	Nitrososphaera gargensis Ga9.2 (CP002408.1 ; AFU57100.1)	0	0	0	0	0	0	0	0	0	0	0	0	0	0	0	0
