# Supplementary material for: Comparative Genomic Analysis of the DUF34 Protein Family Suggests Role as a Metal Ion Chaperone or Insertase
Source: Preprints.org preprint supplement (doi:10.20944/preprints202107.0280.v1), 2021-07-13
Supplement: Supplementary file 12 [file Data Table 9.xlsx]

## Sheet: Content
Data Table 9		Reed et al., 2021
(a.1-a.10) eukaryotic coexpression data retrieved from CoXPresDb for the top 300 co-expressed genes with their respective DUF34 homologs; UniProt and Gene Entrez IDs are provided:
	a.1	NIF3L1 (Q9GZT8, 60491) of Homo sapiens
	a.2	Nif3l1 (Q9EQ80, 65102) of Mus musculus
	a.3	Nif3l1 (Q4V7D6, 301431) of Rattus norvegicus
	a.4	NIF3L1 (F1NDR9, 424076) of Gallus gallus
	a.5	nif3l1 (Q4KMJ5, 574421) of Danio rerio
	a.6	anon-35F/36A / CG4278 (Q9NK57, 34970) of Drosophila melanogaster
	a.7	NIF3L1 (F7B590, 700572) of Macaca mulatta
	a.8	NIF3L1 (E2RQI7, 607446) of Canis lupus familiaris
	a.9	NIF3 / YGL221C (P53081, 852651) of Saccharomyces cerevisiae
	a.10	NIF3 / SPCC126.12 (O94404, 2539063) of Schizosaccharomyces pombe
(b.1-b.10) functional cluster analysis (via DAVID suite) of CoXPresDb co-expression data:
	b.1	NIF3L1 (Q9GZT8, 60491) of Homo sapiens
	b.2	Nif3l1 (Q9EQ80, 65102) of Mus musculus
	b.3	Nif3l1 (Q4V7D6, 301431) of Rattus norvegicus
	b.4	NIF3L1 (F1NDR9, 424076) of Gallus gallus
	b.5	nif3l1 (Q4KMJ5, 574421) of Danio rerio
	b.6	anon-35F/36A / CG4278 (Q9NK57, 34970) of Drosophila melanogaster
	b.7	NIF3L1 (F7B590, 700572) of Macaca mulatta
	b.8	NIF3L1 (E2RQI7, 607446) of Canis lupus familiaris
	b.9	NIF3 / YGL221C (P53081, 852651) of Saccharomyces cerevisiae
	b.10	NIF3 / SPCC126.12 (O94404, 2539063) of Schizosaccharomyces pombe
(c.1-c.10) GSEA (via g:Profiler, g:GOSt; ordered query option selected) of CoXPresDb co-expression data:
	c.1	NIF3L1 (Q9GZT8, 60491) of Homo sapiens
	c.2	Nif3l1 (Q9EQ80, 65102) of Mus musculus
	c.3	Nif3l1 (Q4V7D6, 301431) of Rattus norvegicus
	c.4	NIF3L1 (F1NDR9, 424076) of Gallus gallus
	c.5	nif3l1 (Q4KMJ5, 574421) of Danio rerio
	c.6	anon-35F/36A / CG4278 (Q9NK57, 34970) of Drosophila melanogaster
	c.7	NIF3L1 (F7B590, 700572) of Macaca mulatta
	c.8	NIF3L1 (E2RQI7, 607446) of Canis lupus familiaris
	c.9	NIF3 / YGL221C (P53081, 852651) of Saccharomyces cerevisiae
	c.10	NIF3 / SPCC126.12 (O94404, 2539063) of Schizosaccharomyces pombe

## Sheet: a.1
Rank	Gene	Function	Gene ID
1	OSGEPL1	O-sialoglycoprotein endopeptidase like 1	64172
2	ORC2	origin recognition complex subunit 2	4999
3	GEMIN6	gem nuclear organelle associated protein 6	79833
4	PPIL3	peptidylprolyl isomerase like 3	53938
5	MRPL35	mitochondrial ribosomal protein L35	51318
6	GTF3C2	general transcription factor IIIC subunit 2	2976
7	NUP37	nucleoporin 37	79023
8	WDR12	WD repeat domain 12	55759
9	NUP35	nucleoporin 35	129401
10	UNC50	unc-50 inner nuclear membrane RNA binding protein	25972
11	MTX2	metaxin 2	10651
12	MAIP1	matrix AAA peptidase interacting protein 1	79568
13	CSTF1	cleavage stimulation factor subunit 1	1477
14	RPE	ribulose-5-phosphate-3-epimerase	6120
15	MRPL46	mitochondrial ribosomal protein L46	26589
16	XRCC5	X-ray repair cross complementing 5	7520
17	CCDC51	coiled-coil domain containing 51	79714
18	METTL21A	methyltransferase like 21A	151194
19	ORC4	origin recognition complex subunit 4	5000
20	ORC3	origin recognition complex subunit 3	23595
21	DCLRE1A	DNA cross-link repair 1A	9937
22	RTN4IP1	reticulon 4 interacting protein 1	84816
23	RFC4	replication factor C subunit 4	5984
24	ISCA2	iron-sulfur cluster assembly 2	122961
25	CSE1L	chromosome segregation 1 like	1434
26	GIN1	gypsy retrotransposon integrase 1	54826
27	UMPS	uridine monophosphate synthetase	7372
28	COA5	cytochrome c oxidase assembly factor 5	493753
29	TIMMDC1	translocase of inner mitochondrial membrane domain containing 1	51300
30	METTL5	methyltransferase like 5	29081
31	TXNDC9	thioredoxin domain containing 9	10190
32	POP7	POP7 homolog: ribonuclease P/MRP subunit	10248
33	PRIM1	DNA primase subunit 1	5557
34	NDUFB3	NADH:ubiquinone oxidoreductase subunit B3	4709
35	GTF2E1	general transcription factor IIE subunit 1	2960
36	MRPS23	mitochondrial ribosomal protein S23	51649
37	LIPT1	lipoyltransferase 1	51601
38	COPS7B	COP9 signalosome subunit 7B	64708
39	CDC23	cell division cycle 23	8697
40	NUP107	nucleoporin 107	57122
41	CPSF3	cleavage and polyadenylation specific factor 3	51692
42	METTL13	methyltransferase like 13	51603
43	PSMD14	proteasome 26S subunit: non-ATPase 14	10213
44	HPF1	histone PARylation factor 1	54969
45	NUP85	nucleoporin 85	79902
46	RPA2	replication protein A2	6118
47	ATIC	5-aminoimidazole-4-carboxamide ribonucleotide formyltransferase/IMP cyclohydrolase	471
48	POLR3K	RNA polymerase III subunit K	51728
49	GPN1	GPN-loop GTPase 1	11321
50	NDC1	NDC1 transmembrane nucleoporin	55706
51	RAD51C	RAD51 paralog C	5889
52	FASTKD1	FAST kinase domains 1	79675
53	DNAJA3	DnaJ heat shock protein family (Hsp40) member A3	9093
54	LIN9	lin-9 DREAM MuvB core complex component	286826
55	TIMM21	translocase of inner mitochondrial membrane 21	29090
56	NSMCE4A	NSE4 homolog A: SMC5-SMC6 complex component	54780
57	UBE2T	ubiquitin conjugating enzyme E2 T	29089
58	MSH2	mutS homolog 2	4436
59	MRPL3	mitochondrial ribosomal protein L3	11222
60	FASTKD2	FAST kinase domains 2	22868
61	DPY30	dpy-30: histone methyltransferase complex regulatory subunit	84661
62	POC5	POC5 centriolar protein	134359
63	CETN3	centrin 3	1070
64	MLH1	mutL homolog 1	4292
65	CENPQ	centromere protein Q	55166
66	KNSTRN	kinetochore localized astrin/SPAG5 binding protein	90417
67	MRPL58	mitochondrial ribosomal protein L58	3396
68	MRPS9	mitochondrial ribosomal protein S9	64965
69	PDHB	pyruvate dehydrogenase E1 beta subunit	5162
70	TFB1M	transcription factor B1: mitochondrial	51106
71	COQ5	coenzyme Q5: methyltransferase	84274
72	CCDC77	coiled-coil domain containing 77	84318
73	ARV1	ARV1 homolog: fatty acid homeostasis modulator	64801
74	NHEJ1	non-homologous end joining factor 1	79840
75	BOLA1	bolA family member 1	51027
76	GEMIN2	gem nuclear organelle associated protein 2	8487
77	GTF3C3	general transcription factor IIIC subunit 3	9330
78	RPP30	ribonuclease P/MRP subunit p30	10556
79	PPIL1	peptidylprolyl isomerase like 1	51645
80	COQ3	coenzyme Q3: methyltransferase	51805
81	RFC5	replication factor C subunit 5	5985
82	EMG1	EMG1: N1-specific pseudouridine methyltransferase	10436
83	CKS1B	CDC28 protein kinase regulatory subunit 1B	1163
84	TBP	TATA-box binding protein	6908
85	CEP76	centrosomal protein 76	79959
86	SEPHS1	selenophosphate synthetase 1	22929
87	TMEM203	transmembrane protein 203	94107
88	MITD1	microtubule interacting and trafficking domain containing 1	129531
89	YAE1D1	Yae1 domain containing 1	57002
90	NUPL2	nucleoporin like 2	11097
91	UQCC1	ubiquinol-cytochrome c reductase complex assembly factor 1	55245
92	SNUPN	snurportin 1	10073
93	C14orf119	chromosome 14 open reading frame 119	55017
94	STARD7	StAR related lipid transfer domain containing 7	56910
95	TBC1D31	TBC1 domain family member 31	93594
96	PALB2	partner and localizer of BRCA2	79728
97	BORA	bora: aurora kinase A activator	79866
98	ACTL6A	actin like 6A	86
99	MRPL18	mitochondrial ribosomal protein L18	29074
100	CHCHD4	coiled-coil-helix-coiled-coil-helix domain containing 4	131474
101	COG2	component of oligomeric golgi complex 2	22796
102	MCEE	methylmalonyl-CoA epimerase	84693
103	MTIF2	mitochondrial translational initiation factor 2	4528
104	SLC25A12	solute carrier family 25 member 12	8604
105	MDH1	malate dehydrogenase 1	4190
106	WDR61	WD repeat domain 61	80349
107	MRPS28	mitochondrial ribosomal protein S28	28957
108	BUB3	BUB3: mitotic checkpoint protein	9184
109	TEFM	transcription elongation factor: mitochondrial	79736
110	ERCC3	ERCC excision repair 3: TFIIH core complex helicase subunit	2071
111	GATB	glutamyl-tRNA amidotransferase subunit B	5188
112	RPA3	replication protein A3	6119
113	SGO2	shugoshin 2	151246
114	C5orf34	chromosome 5 open reading frame 34	375444
115	TMEM186	transmembrane protein 186	25880
116	MED20	mediator complex subunit 20	9477
117	HAT1	histone acetyltransferase 1	8520
118	SNAPC5	small nuclear RNA activating complex polypeptide 5	10302
119	TMEM177	transmembrane protein 177	80775
120	MRPL15	mitochondrial ribosomal protein L15	29088
121	AASDH	aminoadipate-semialdehyde dehydrogenase	132949
122	EIF2B1	eukaryotic translation initiation factor 2B subunit alpha	1967
123	TMEM60	transmembrane protein 60	85025
124	DDX1	DEAD-box helicase 1	1653
125	SLC4A1AP	solute carrier family 4 member 1 adaptor protein	22950
126	HYLS1	HYLS1: centriolar and ciliogenesis associated	219844
127	MED11	mediator complex subunit 11	400569
128	NFS1	NFS1: cysteine desulfurase	9054
129	ORC5	origin recognition complex subunit 5	5001
130	CHCHD1	coiled-coil-helix-coiled-coil-helix domain containing 1	118487
131	SNRNP40	small nuclear ribonucleoprotein U5 subunit 40	9410
132	TDP1	tyrosyl-DNA phosphodiesterase 1	55775
133	TMEM223	transmembrane protein 223	79064
134	LMAN2L	lectin: mannose binding 2 like	81562
135	MMADHC	methylmalonic aciduria and homocystinuria: cblD type	27249
136	NDUFS1	NADH:ubiquinone oxidoreductase core subunit S1	4719
137	MRPL30	mitochondrial ribosomal protein L30	51263
138	GPN3	GPN-loop GTPase 3	51184
139	PSMA5	proteasome subunit alpha 5	5686
140	XRCC4	X-ray repair cross complementing 4	7518
141	RAD1	RAD1 checkpoint DNA exonuclease	5810
142	POP4	POP4 homolog: ribonuclease P/MRP subunit	10775
143	MRPS14	mitochondrial ribosomal protein S14	63931
144	COPS5	COP9 signalosome subunit 5	10987
145	DNAJC19	DnaJ heat shock protein family (Hsp40) member C19	131118
146	PLRG1	pleiotropic regulator 1	5356
147	USP39	ubiquitin specific peptidase 39	10713
148	TTC9C	tetratricopeptide repeat domain 9C	283237
149	PARP2	poly(ADP-ribose) polymerase 2	10038
150	C17orf75	chromosome 17 open reading frame 75	64149
151	KNOP1	lysine rich nucleolar protein 1	400506
152	NSL1	NSL1: MIS12 kinetochore complex component	25936
153	KAT14	lysine acetyltransferase 14	57325
154	PIGF	phosphatidylinositol glycan anchor biosynthesis class F	5281
155	PPP1R8	protein phosphatase 1 regulatory subunit 8	5511
156	ALG8	ALG8: alpha-1:3-glucosyltransferase	79053
157	NUP133	nucleoporin 133	55746
158	NDUFAB1	NADH:ubiquinone oxidoreductase subunit AB1	4706
159	TAF5	TATA-box binding protein associated factor 5	6877
160	PIK3R4	phosphoinositide-3-kinase regulatory subunit 4	30849
161	MOB4	MOB family member 4: phocein	25843
162	MRPS18B	mitochondrial ribosomal protein S18B	28973
163	C1orf131	chromosome 1 open reading frame 131	128061
164	ASNSD1	asparagine synthetase domain containing 1	54529
165	MFF	mitochondrial fission factor	56947
166	CUTC	cutC copper transporter	51076
167	NUDT5	nudix hydrolase 5	11164
168	MRFAP1L1	Morf4 family associated protein 1 like 1	114932
169	SMARCAL1	SWI/SNF related: matrix associated: actin dependent regulator of chromatin: subfamily a like 1	50485
170	MRPL16	mitochondrial ribosomal protein L16	54948
171	TMEM99	transmembrane protein 99	147184
172	PRDX3	peroxiredoxin 3	10935
173	HSPE1	heat shock protein family E (Hsp10) member 1	3336
174	TBCE	tubulin folding cofactor E	6905
175	ASF1A	anti-silencing function 1A histone chaperone	25842
176	MRPS22	mitochondrial ribosomal protein S22	56945
177	ZWILCH	zwilch kinetochore protein	55055
178	MAT2B	methionine adenosyltransferase 2B	27430
179	TARS2	threonyl-tRNA synthetase 2: mitochondrial	80222
180	PAAF1	proteasomal ATPase associated factor 1	80227
181	IMP3	IMP3: U3 small nucleolar ribonucleoprotein	55272
182	TTI1	TELO2 interacting protein 1	9675
183	LDAH	lipid droplet associated hydrolase	60526
184	MRPL17	mitochondrial ribosomal protein L17	63875
185	DTYMK	deoxythymidylate kinase	1841
186	OXSM	3-oxoacyl-ACP synthase: mitochondrial	54995
187	CHEK2	checkpoint kinase 2	11200
188	VPS25	vacuolar protein sorting 25 homolog	84313
189	WDR75	WD repeat domain 75	84128
190	GLOD4	glyoxalase domain containing 4	51031
191	MRPL45	mitochondrial ribosomal protein L45	84311
192	DSN1	DSN1 homolog: MIS12 kinetochore complex component	79980
193	VPS72	vacuolar protein sorting 72 homolog	6944
194	XPO1	exportin 1	7514
195	ATG4C	autophagy related 4C cysteine peptidase	84938
196	MGME1	mitochondrial genome maintenance exonuclease 1	92667
197	TMEM126B	transmembrane protein 126B	55863
198	VPS45	vacuolar protein sorting 45 homolog	11311
199	MRPL13	mitochondrial ribosomal protein L13	28998
200	ABHD10	abhydrolase domain containing 10	55347
201	ARMC1	armadillo repeat containing 1	55156
202	CCT4	chaperonin containing TCP1 subunit 4	10575
203	PPIE	peptidylprolyl isomerase E	10450
204	SPDL1	spindle apparatus coiled-coil protein 1	54908
205	MTERF3	mitochondrial transcription termination factor 3	51001
206	ZNF232	zinc finger protein 232	7775
207	MRPS7	mitochondrial ribosomal protein S7	51081
208	AURKA	aurora kinase A	6790
209	RPP38	ribonuclease P/MRP subunit p38	10557
210	MRPL34	mitochondrial ribosomal protein L34	64981
211	EXOSC8	exosome component 8	11340
212	OXNAD1	oxidoreductase NAD binding domain containing 1	92106
213	MKKS	McKusick-Kaufman syndrome	8195
214	DDX23	DEAD-box helicase 23	9416
215	ATP5MC3	ATP synthase membrane subunit c locus 3	518
216	METTL17	methyltransferase like 17	64745
217	MSL3P1	MSL complex subunit 3 pseudogene 1	151507
218	SNRPG	small nuclear ribonucleoprotein polypeptide G	6637
219	TRMT61B	tRNA methyltransferase 61B	55006
220	ZDHHC6	zinc finger DHHC-type containing 6	64429
221	PPIH	peptidylprolyl isomerase H	10465
222	FAM192A	family with sequence similarity 192 member A	80011
223	POP5	POP5 homolog: ribonuclease P/MRP subunit	51367
224	THYN1	thymocyte nuclear protein 1	29087
225	COA6	cytochrome c oxidase assembly factor 6	388753
226	PIGC	phosphatidylinositol glycan anchor biosynthesis class C	5279
227	RFT1	RFT1 homolog	91869
228	MTO1	mitochondrial tRNA translation optimization 1	25821
229	TUBD1	tubulin delta 1	51174
230	EIPR1	EARP complex and GARP complex interacting protein 1	7260
231	WDR92	WD repeat domain 92	116143
232	MIS18A	MIS18 kinetochore protein A	54069
233	PCID2	PCI domain containing 2	55795
234	ADSL	adenylosuccinate lyase	158
235	MRPS31	mitochondrial ribosomal protein S31	10240
236	PTCD3	pentatricopeptide repeat domain 3	55037
237	RACGAP1	Rac GTPase activating protein 1	29127
238	LANCL1	LanC like 1	10314
239	RMI1	RecQ mediated genome instability 1	80010
240	CDC123	cell division cycle 123	8872
241	LOC728554	THO complex 3 pseudogene	728554
242	SLC35A5	solute carrier family 35 member A5	55032
243	METTL18	methyltransferase like 18	92342
244	ELP4	elongator acetyltransferase complex subunit 4	26610
245	ORMDL1	ORMDL sphingolipid biosynthesis regulator 1	94101
246	SNAPIN	SNAP associated protein	23557
247	EIF4E2	eukaryotic translation initiation factor 4E family member 2	9470
248	IMMT	inner membrane mitochondrial protein	10989
249	MRM2	mitochondrial rRNA methyltransferase 2	29960
250	MRPS18C	mitochondrial ribosomal protein S18C	51023
251	ATP5F1C	ATP synthase F1 subunit gamma	509
252	DHRS7B	dehydrogenase/reductase 7B	25979
253	BCS1L	BCS1 homolog: ubiquinol-cytochrome c reductase complex chaperone	617
254	VRK1	vaccinia related kinase 1	7443
255	YARS2	tyrosyl-tRNA synthetase 2	51067
256	ZBED8	zinc finger BED-type containing 8	63920
257	SMYD4	SET and MYND domain containing 4	114826
258	ANAPC1	anaphase promoting complex subunit 1	64682
259	NUDCD1	NudC domain containing 1	84955
260	C1orf112	chromosome 1 open reading frame 112	55732
261	INTS14	integrator complex subunit 14	81556
262	NDUFA8	NADH:ubiquinone oxidoreductase subunit A8	4702
263	SLC30A6	solute carrier family 30 member 6	55676
264	PSMD10	proteasome 26S subunit: non-ATPase 10	5716
265	MTREX	Mtr4 exosome RNA helicase	23517
266	BET1	Bet1 golgi vesicular membrane trafficking protein	10282
267	NUP205	nucleoporin 205	23165
268	ZW10	zw10 kinetochore protein	9183
269	RPA1	replication protein A1	6117
270	CNOT11	CCR4-NOT transcription complex subunit 11	55571
271	ZCCHC9	zinc finger CCHC-type containing 9	84240
272	THNSL1	threonine synthase like 1	79896
273	GOLPH3L	golgi phosphoprotein 3 like	55204
274	ZNF143	zinc finger protein 143	7702
275	TMEM69	transmembrane protein 69	51249
276	THOC3	THO complex 3	84321
277	ZNF2	zinc finger protein 2	7549
278	MED31	mediator complex subunit 31	51003
279	UFSP2	UFM1 specific peptidase 2	55325
280	ERI2	ERI1 exoribonuclease family member 2	112479
281	TMEM237	transmembrane protein 237	65062
282	CSTF2	cleavage stimulation factor subunit 2	1478
283	RAN	RAN: member RAS oncogene family	5901
284	PPWD1	peptidylprolyl isomerase domain and WD repeat containing 1	23398
285	MRPL39	mitochondrial ribosomal protein L39	54148
286	MRPS27	mitochondrial ribosomal protein S27	23107
287	THAP11	THAP domain containing 11	57215
288	RFC3	replication factor C subunit 3	5983
289	DYNC1I2	dynein cytoplasmic 1 intermediate chain 2	1781
290	TSG101	tumor susceptibility 101	7251
291	CDK5RAP1	CDK5 regulatory subunit associated protein 1	51654
292	ASCC1	activating signal cointegrator 1 complex subunit 1	51008
293	MMACHC	methylmalonic aciduria (cobalamin deficiency) cblC type: with homocystinuria	25974
294	CWC22	CWC22 spliceosome associated protein homolog	57703
295	GPATCH1	G-patch domain containing 1	55094
296	MCM3	minichromosome maintenance complex component 3	4172
297	DARS2	aspartyl-tRNA synthetase 2: mitochondrial	55157
298	COQ7	coenzyme Q7: hydroxylase	10229
299	PSMD1	proteasome 26S subunit: non-ATPase 1	5707
300	FAM217B	family with sequence similarity 217 member B	63939

## Sheet: a.2
Rank	Gene	Function	Gene ID
1	Trmt5	TRM5 tRNA methyltransferase 5	76357
2	Pes1	pescadillo ribosomal biogenesis factor 1	64934
3	Prpf31	pre-mRNA processing factor 31	68988
4	Polr1e	polymerase (RNA) I polypeptide E	64424
5	Rpl7l1	ribosomal protein L7-like 1	66229
6	Gpn1	GPN-loop GTPase 1	74254
7	Imp4	IMP4: U3 small nucleolar ribonucleoprotein	27993
8	Utp6	UTP6 small subunit processome component	216987
9	Cct3	chaperonin containing Tcp1: subunit 3 (gamma)	12462
10	Plrg1	pleiotropic regulator 1	53317
11	Mrpl19	mitochondrial ribosomal protein L19	56284
12	Mrpl44	mitochondrial ribosomal protein L44	69163
13	Nifk	nucleolar protein interacting with the FHA domain of MKI67	67949
14	Tefm	transcription elongation factor: mitochondrial	68550
15	Nol11	nucleolar protein 11	68979
16	Ndufaf1	NADH dehydrogenase (ubiquinone) 1 alpha subcomplex: assembly factor 1	69702
17	Trappc13	trafficking protein particle complex 13	66975
18	Ftsj1	FtsJ RNA methyltransferase homolog 1 (E. coli)	54632
19	Fastkd2	FAST kinase domains 2	75619
20	Eif2b3	eukaryotic translation initiation factor 2B: subunit 3	108067
21	Ppil3	peptidylprolyl isomerase (cyclophilin)-like 3	70225
22	Ecd	ecdysoneless cell cycle regulator	70601
23	Mrps22	mitochondrial ribosomal protein S22	64655
24	Rars	arginyl-tRNA synthetase	104458
25	Nop16	NOP16 nucleolar protein	28126
26	Apex1	apurinic/apyrimidinic endonuclease 1	11792
27	Polr3k	polymerase (RNA) III (DNA directed) polypeptide K	67005
28	Mrpl50	mitochondrial ribosomal protein L50	28028
29	Dars2	aspartyl-tRNA synthetase 2 (mitochondrial)	226539
30	Med19	mediator complex subunit 19	381379
31	Itpa	inosine triphosphatase (nucleoside triphosphate pyrophosphatase)	16434
32	Psmd5	proteasome (prosome: macropain) 26S subunit: non-ATPase: 5	66998
33	Thyn1	thymocyte nuclear protein 1	77862
34	Tmem69	transmembrane protein 69	230657
35	Gtf2h3	general transcription factor IIH: polypeptide 3	209357
36	Thoc5	THO complex 5	107829
37	Ppa1	pyrophosphatase (inorganic) 1	67895
38	Mrps2	mitochondrial ribosomal protein S2	118451
39	Farsb	phenylalanyl-tRNA synthetase: beta subunit	23874
40	Umps	uridine monophosphate synthetase	22247
41	Mrpl35	mitochondrial ribosomal protein L35	66223
42	Psmd14	proteasome (prosome: macropain) 26S subunit: non-ATPase: 14	59029
43	Eif2b1	eukaryotic translation initiation factor 2B: subunit 1 (alpha)	209354
44	Mrpl22	mitochondrial ribosomal protein L22	216767
45	Mtap	methylthioadenosine phosphorylase	66902
46	Psmg1	proteasome (prosome: macropain) assembly chaperone 1	56088
47	Ddx31	DEAD/H (Asp-Glu-Ala-Asp/His) box polypeptide 31	227674
48	Eif4e	eukaryotic translation initiation factor 4E	13684
49	Ttc27	tetratricopeptide repeat domain 27	74196
50	Txndc9	thioredoxin domain containing 9	98258
51	Adsl	adenylosuccinate lyase	11564
52	Nsfl1c	NSFL1 (p97) cofactor (p47)	386649
53	Nup43	nucleoporin 43	69912
54	Pwp1	PWP1 homolog: endonuclein	103136
55	Wdr77	WD repeat domain 77	70465
56	Ppp2r3c	protein phosphatase 2: regulatory subunit B'': gamma	59032
57	Psmc4	proteasome (prosome: macropain) 26S subunit: ATPase: 4	23996
58	Clns1a	chloride channel: nucleotide-sensitive: 1A	12729
59	Mrpl40	mitochondrial ribosomal protein L40	18100
60	Ptcd2	pentatricopeptide repeat domain 2	68927
61	Ddx18	DEAD (Asp-Glu-Ala-Asp) box polypeptide 18	66942
62	Wdr74	WD repeat domain 74	107071
63	Pno1	partner of NOB1 homolog	66249
64	Hnrnpc	heterogeneous nuclear ribonucleoprotein C	15381
65	1110008L16Rik	RIKEN cDNA 1110008L16 gene	66132
66	Mmachc	methylmalonic aciduria cblC type: with homocystinuria	67096
67	Dimt1	DIM1 dimethyladenosine transferase 1-like (S. cerevisiae)	66254
68	Aimp2	aminoacyl tRNA synthetase complex-interacting multifunctional protein 2	231872
69	Rabepk	Rab9 effector protein with kelch motifs	227746
70	Wdr12	WD repeat domain 12	57750
71	Ptrh2	peptidyl-tRNA hydrolase 2	217057
72	Gtf3c3	general transcription factor IIIC: polypeptide 3	98488
73	Cct5	chaperonin containing Tcp1: subunit 5 (epsilon)	12465
74	Tmem177	transmembrane protein 177	66343
75	Smu1	smu-1 suppressor of mec-8 and unc-52 homolog (C. elegans)	74255
76	Wdr55	WD repeat domain 55	67936
77	Nutf2	nuclear transport factor 2	68051
78	Gtf3c6	general transcription factor IIIC: polypeptide 6: alpha	67371
79	Bcs1l	BCS1-like (yeast)	66821
80	Commd2	COMM domain containing 2	52245
81	Rabif	RAB interacting factor	98710
82	Exosc1	exosome component 1	66583
83	Kbtbd4	kelch repeat and BTB (POZ) domain containing 4	67136
84	Eef1akmt1	EEF1A alpha lysine methyltransferase 1	68043
85	Prmt5	protein arginine N-methyltransferase 5	27374
86	Ebna1bp2	EBNA1 binding protein 2	69072
87	Nup37	nucleoporin 37	69736
88	Spryd4	SPRY domain containing 4	66701
89	Gtf2h2	general transcription factor II H: polypeptide 2	23894
90	2700062C07Rik	RIKEN cDNA 2700062C07 gene	68046
91	Mrps27	mitochondrial ribosomal protein S27	218506
92	Jagn1	jagunal homolog 1	67767
93	Tsen2	tRNA splicing endonuclease subunit 2	381802
94	Mrm2	mitochondrial rRNA methyltransferase 2	68017
95	Sap30bp	SAP30 binding protein	57230
96	Mterf4	mitochondrial transcription termination factor 4	69821
97	Stip1	stress-induced phosphoprotein 1	20867
98	Champ1	chromosome alignment maintaining phosphoprotein 1	101994
99	Stoml2	stomatin (Epb7.2)-like 2	66592
100	Ddx56	DEAD (Asp-Glu-Ala-Asp) box polypeptide 56	52513
101	Slc30a6	solute carrier family 30 (zinc transporter): member 6	210148
102	Nudt5	nudix (nucleoside diphosphate linked moiety X)-type motif 5	53893
103	Cops3	COP9 signalosome subunit 3	26572
104	Armc6	armadillo repeat containing 6	76813
105	Mrps25	mitochondrial ribosomal protein S25	64658
106	Timm22	translocase of inner mitochondrial membrane 22	56322
107	Aen	apoptosis enhancing nuclease	68048
108	Rpp14	ribonuclease P 14 subunit	67053
109	AW209491	expressed sequence AW209491	105351
110	Rpap3	RNA polymerase II associated protein 3	71919
111	Gps1	G protein pathway suppressor 1	209318
112	Cops4	COP9 signalosome subunit 4	26891
113	Gart	phosphoribosylglycinamide formyltransferase	14450
114	Dtwd1	DTW domain containing 1	69185
115	Yars2	tyrosyl-tRNA synthetase 2 (mitochondrial)	70120
116	Mettl16	methyltransferase like 16	67493
117	Sec13	SEC13 homolog: nuclear pore and COPII coat complex component	110379
118	Mrps23	mitochondrial ribosomal protein S23	64656
119	2700097O09Rik	RIKEN cDNA 2700097O09 gene	72658
120	Triap1	TP53 regulated inhibitor of apoptosis 1	69076
121	Mrpl15	mitochondrial ribosomal protein L15	27395
122	Sf3a3	splicing factor 3a: subunit 3	75062
123	Maip1	matrix AAA peptidase interacting protein 1	68115
124	Sdhaf2	succinate dehydrogenase complex assembly factor 2	66072
125	Gtf2f2	general transcription factor IIF: polypeptide 2	68705
126	Med6	mediator complex subunit 6	69792
127	Pop4	processing of precursor 4: ribonuclease P/MRP family: (S. cerevisiae)	66161
128	Snupn	snurportin 1	66069
129	Qrsl1	glutaminyl-tRNA synthase (glutamine-hydrolyzing)-like 1	76563
130	Atic	5-aminoimidazole-4-carboxamide ribonucleotide formyltransferase/IMP cyclohydrolase	108147
131	Cdk7	cyclin-dependent kinase 7	12572
132	Brix1	BRX1: biogenesis of ribosomes	67832
133	Trmt10b	tRNA methyltransferase 10B	69934
134	Cct7	chaperonin containing Tcp1: subunit 7 (eta)	12468
135	Mrrf	mitochondrial ribosome recycling factor	67871
136	Lsg1	large 60S subunit nuclear export GTPase 1	224092
137	Abce1	ATP-binding cassette: sub-family E (OABP): member 1	24015
138	1110004F10Rik	RIKEN cDNA 1110004F10 gene	56372
139	Aar2	AAR2 splicing factor homolog	68295
140	Ints4	integrator complex subunit 4	101861
141	Nup35	nucleoporin 35	69482
142	Dusp19	dual specificity phosphatase 19	68082
143	Ttc30a1	tetratricopeptide repeat domain 30A1	78802
144	Drg1	developmentally regulated GTP binding protein 1	13494
145	Phb	prohibitin	18673
146	Fastkd5	FAST kinase domains 5	380601
147	Mrpl49	mitochondrial ribosomal protein L49	18120
148	Tbl3	transducin (beta)-like 3	213773
149	Lipt1	lipoyltransferase 1	623661
150	Rars2	arginyl-tRNA synthetase 2: mitochondrial	109093
151	Vta1	vesicle (multivesicular body) trafficking 1	66201
152	Polr2d	polymerase (RNA) II (DNA directed) polypeptide D	69241
153	Tsn	translin	22099
154	Wars	tryptophanyl-tRNA synthetase	22375
155	Ppil1	peptidylprolyl isomerase (cyclophilin)-like 1	68816
156	Mrpl47	mitochondrial ribosomal protein L47	74600
157	Ccdc51	coiled-coil domain containing 51	66658
158	Drg2	developmentally regulated GTP binding protein 2	13495
159	Wdr36	WD repeat domain 36	225348
160	Rpf2	ribosome production factor 2 homolog	67239
161	Atg4b	autophagy related 4B: cysteine peptidase	66615
162	Eif2s1	eukaryotic translation initiation factor 2: subunit 1 alpha	13665
163	Dnajc11	DnaJ heat shock protein family (Hsp40) member C11	230935
164	Kdelc1	KDEL (Lys-Asp-Glu-Leu) containing 1	72050
165	Otud6b	OTU domain containing 6B	72201
166	Riox2	ribosomal oxygenase 2	67014
167	Nupl2	nucleoporin like 2	231042
168	Gtf2e1	general transcription factor II E: polypeptide 1 (alpha subunit)	74197
169	Mrpl46	mitochondrial ribosomal protein L46	67308
170	Mrpl3	mitochondrial ribosomal protein L3	94062
171	Pum3	pumilio RNA-binding family member 3	52874
172	Psmc2	proteasome (prosome: macropain) 26S subunit: ATPase 2	19181
173	Tpd52l2	tumor protein D52-like 2	66314
174	Ahsa1	AHA1: activator of heat shock protein ATPase 1	217737
175	Grwd1	glutamate-rich WD repeat containing 1	101612
176	Wdr75	WD repeat domain 75	73674
177	Polr1b	polymerase (RNA) I polypeptide B	20017
178	Eif3d	eukaryotic translation initiation factor 3: subunit D	55944
179	Cct6a	chaperonin containing Tcp1: subunit 6a (zeta)	12466
180	Lcmt2	leucine carboxyl methyltransferase 2	329504
181	Mrps31	mitochondrial ribosomal protein S31	57312
182	Elp6	elongator acetyltransferase complex subunit 6	72341
183	Zc3hc1	zinc finger: C3HC type 1	232679
184	Prps1l3	phosphoribosyl pyrophosphate synthetase 1-like 3	328099
185	Lrrc59	leucine rich repeat containing 59	98238
186	Med29	mediator complex subunit 29	67224
187	Bud31	BUD31 homolog	231889
188	Ppp1r8	protein phosphatase 1: regulatory (inhibitor) subunit 8	100336
189	Orc3	origin recognition complex: subunit 3	50793
190	Rpp40	ribonuclease P 40 subunit	208366
191	Ube2n	ubiquitin-conjugating enzyme E2N	93765
192	Mrpl10	mitochondrial ribosomal protein L10	107732
193	Nubp2	nucleotide binding protein 2	26426
194	Sco1	SCO1 cytochrome c oxidase assembly protein	52892
195	Gmps	guanine monophosphate synthetase	229363
196	Bysl	bystin-like	53414
197	Pwp2	PWP2 periodic tryptophan protein homolog (yeast)	110816
198	Tars2	threonyl-tRNA synthetase 2: mitochondrial (putative)	71807
199	Cops8	COP9 signalosome subunit 8	108679
200	Pde12	phosphodiesterase 12	211948
201	Tmem33	transmembrane protein 33	67878
202	Trmt10a	tRNA methyltransferase 10A	108943
203	Dus2	dihydrouridine synthase 2	66369
204	Znhit3	zinc finger: HIT type 3	448850
205	Hikeshi	heat shock protein nuclear import factor	67669
206	Yae1d1	Yae1 domain containing 1	67008
207	Pgam5	phosphoglycerate mutase family member 5	72542
208	Cdc23	CDC23 cell division cycle 23	52563
209	Exosc9	exosome component 9	50911
210	Ruvbl1	RuvB-like protein 1	56505
211	Clpp	caseinolytic mitochondrial matrix peptidase proteolytic subunit	53895
212	Wrb	tryptophan rich basic protein	71446
213	Psmb3	proteasome (prosome: macropain) subunit: beta type 3	26446
214	Utp23	UTP23 small subunit processome component	78581
215	Txnl4a	thioredoxin-like 4A	27366
216	Leo1	Leo1: Paf1/RNA polymerase II complex component	235497
217	Psmd12	proteasome (prosome: macropain) 26S subunit: non-ATPase: 12	66997
218	Kars	lysyl-tRNA synthetase	85305
219	Nip7	NIP7: nucleolar pre-rRNA processing protein	66164
220	Rad1	RAD1 checkpoint DNA exonuclease	19355
221	Mrpl21	mitochondrial ribosomal protein L21	353242
222	Tsen15	tRNA splicing endonuclease subunit 15	66637
223	Fbxo22	F-box protein 22	71999
224	Cacybp	calcyclin binding protein	12301
225	Psma5	proteasome (prosome: macropain) subunit: alpha type 5	26442
226	Slc25a17	solute carrier family 25 (mitochondrial carrier: peroxisomal membrane protein): member 17	20524
227	Smyd5	SET and MYND domain containing 5	232187
228	2810004N23Rik	RIKEN cDNA 2810004N23 gene	66523
229	Dph3	diphthamine biosynthesis 3	105638
230	1700123O20Rik	RIKEN cDNA 1700123O20 gene	58248
231	D6Wsu163e	DNA segment: Chr 6: Wayne State University 163: expressed	28040
232	Nudcd1	NudC domain containing 1	67429
233	Ncbp2	nuclear cap binding protein subunit 2	68092
234	Ints2	integrator complex subunit 2	70422
235	Cdk5rap1	CDK5 regulatory subunit associated protein 1	66971
236	Pgm3	phosphoglucomutase 3	109785
237	Coq3	coenzyme Q3 methyltransferase	230027
238	Cinp	cyclin-dependent kinase 2 interacting protein	67236
239	Snu13	SNU13 homolog: small nuclear ribonucleoprotein (U4/U6.U5)	20826
240	Dhodh	dihydroorotate dehydrogenase	56749
241	Noc3l	NOC3 like DNA replication regulator	57753
242	Ddx28	DEAD (Asp-Glu-Ala-Asp) box polypeptide 28	71986
243	Rbmxl1	RNA binding motif protein: X-linked like-1	19656
244	Coil	coilin	12812
245	Bud23	BUD23: rRNA methyltransferase and ribosome maturation factor	66138
246	Timm23	translocase of inner mitochondrial membrane 23	53600
247	Det1	de-etiolated homolog 1 (Arabidopsis)	76375
248	Ndufaf7	NADH dehydrogenase (ubiquinone) 1 alpha subcomplex assembly factor 7	73694
249	Ppid	peptidylprolyl isomerase D (cyclophilin D)	67738
250	Znhit6	zinc finger: HIT type 6	229937
251	Ilf2	interleukin enhancer binding factor 2	67781
252	Cct8	chaperonin containing Tcp1: subunit 8 (theta)	12469
253	Ltv1	LTV1 ribosome biogenesis factor	353258
254	Cwf19l1	CWF19-like 1: cell cycle control (S. pombe)	72502
255	Supv3l1	suppressor of var1: 3-like 1 (S. cerevisiae)	338359
256	Gemin5	gem nuclear organelle associated protein 5	216766
257	Ccnc	cyclin C	51813
258	Ovca2	candidate tumor suppressor in ovarian cancer 2	246257
259	Dnajc24	DnaJ heat shock protein family (Hsp40) member C24	99349
260	Dctn5	dynactin 5	59288
261	Foxred1	FAD-dependent oxidoreductase domain containing 1	235169
262	1110012L19Rik	RIKEN cDNA 1110012L19 gene	68618
263	Cdc26	cell division cycle 26	66440
264	Med8	mediator complex subunit 8	80509
265	Swsap1	SWIM type zinc finger 7 associated protein 1	66962
266	Rpusd2	RNA pseudouridylate synthase domain containing 2	271842
267	Mrpl45	mitochondrial ribosomal protein L45	67036
268	Wdr89	WD repeat domain 89	72338
269	Tfb1m	transcription factor B1: mitochondrial	224481
270	Nme1	NME/NM23 nucleoside diphosphate kinase 1	18102
271	Hsph1	heat shock 105kDa/110kDa protein 1	15505
272	Poglut1	protein O-glucosyltransferase 1	224143
273	Bloc1s6	biogenesis of lysosomal organelles complex-1: subunit 6: pallidin	18457
274	Grpel1	GrpE-like 1: mitochondrial	17713
275	Wdr70	WD repeat domain 70	545085
276	Msantd4	Myb/SANT-like DNA-binding domain containing 4 with coiled-coils	78100
277	Tsg101	tumor susceptibility gene 101	22088
278	Ldah	lipid droplet associated hydrolase	68832
279	Heatr3	HEAT repeat containing 3	234549
280	Ccdc43	coiled-coil domain containing 43	52715
281	Gemin4	gem nuclear organelle associated protein 4	276919
282	Ece2	endothelin converting enzyme 2	107522
283	2410131K14Rik	RIKEN cDNA 2410131K14 gene	76792
284	Pbdc1	polysaccharide biosynthesis domain containing 1	67683
285	Rrp15	ribosomal RNA processing 15 homolog (S. cerevisiae)	67223
286	Ints14	integrator complex subunit 14	69882
287	Ptcd3	pentatricopeptide repeat domain 3	69956
288	Uba3	ubiquitin-like modifier activating enzyme 3	22200
289	Crnkl1	crooked neck pre-mRNA splicing factor 1	66877
290	Mrpl16	mitochondrial ribosomal protein L16	94063
291	E2f6	E2F transcription factor 6	50496
292	Smarcal1	SWI/SNF related matrix associated: actin dependent regulator of chromatin: subfamily a-like 1	54380
293	Eral1	Era (G-protein)-like 1 (E. coli)	57837
294	Trmt6	tRNA methyltransferase 6	66926
295	Smg8	smg-8 homolog: nonsense mediated mRNA decay factor (C. elegans)	74133
296	Emg1	EMG1 N1-specific pseudouridine methyltransferase	14791
297	Pdzd11	PDZ domain containing 11	72621
298	Hspa4	heat shock protein 4	15525
299	Sephs1	selenophosphate synthetase 1	109079
300	Yars	tyrosyl-tRNA synthetase	107271

## Sheet: a.3
Rank	Gene	Function	Gene ID
1	Thumpd3	THUMP domain containing 3	500288
2	Tfb1m	transcription factor B1: mitochondrial	308140
3	Mettl2b	methyltransferase like 2B	363687
4	Polr1a	RNA polymerase I subunit A	83581
5	Tmem209	transmembrane protein 209	312200
6	Diexf	digestive organ expansion factor homolog (zebrafish)	305076
7	Sdad1	SDA1 domain containing 1	289504
8	Mettl16	methyltransferase like 16	360568
9	Ccdc86	coiled-coil domain containing 86	293738
10	Alg12	ALG12: alpha-1:6-mannosyltransferase	315212
11	Cct5	chaperonin containing TCP1 subunit 5	294864
12	Farsb	phenylalanyl-tRNA synthetase: beta subunit	301544
13	Mettl3	methyltransferase-like 3	361035
14	Rars2	arginyl-tRNA synthetase 2: mitochondrial	297969
15	Dus4l	dihydrouridine synthase 4-like	366593
16	Tmem186	transmembrane protein 186	497863
17	Trmt2a	tRNA methyltransferase 2 homolog A	287953
18	Smyd5	SMYD family member 5	312503
19	Tsen2	tRNA splicing endonuclease subunit 2	312649
20	Orc5	origin recognition complex: subunit 5	362304
21	Ruvbl2	RuvB-like AAA ATPase 2	292907
22	Ftsj1	FtsJ RNA methyltransferase homolog 1	363450
23	Yae1d1	Yae1 domain containing 1	306994
24	Mettl1	methyltransferase like 1	679091
25	Cct3	chaperonin containing TCP1 subunit 3	295230
26	Nme6	NME/NM23 nucleoside diphosphate kinase 6	58964
27	Ddx31	DEAD-box helicase 31	311835
28	Nop16	NOP16 nucleolar protein	306768
29	Pwp1	PWP1 homolog: endonuclein	362856
30	Ipo4	importin 4	290228
31	Utp20	UTP20 small subunit processome component	314713
32	Dscr3	DSCR3 arrestin fold containing	360703
33	Trmt5	tRNA methyltransferase 5	362754
34	Bcs1l	BCS1 homolog: ubiquinol-cytochrome c reductase complex chaperone	301514
35	Naa25	N(alpha)-acetyltransferase 25: NatB auxiliary subunit	360811
36	mrpl24	mitochondrial ribosomal protein L24	295224
37	Rae1	ribonucleic acid export 1	362281
38	Gtf2h2	general transcription factor IIH subunit 2	294693
39	Pno1	partner of NOB1 homolog	289809
40	Fam173b	family with sequence similarity 173: member B	499561
41	Noc3l	NOC3-like DNA replication regulator	361753
42	Med8	mediator complex subunit 8	362575
43	Eif2b1	eukaryotic translation initiation factor 2B subunit alpha	64514
44	Polr3f	RNA polymerase III subunit F	311487
45	Pus3	pseudouridylate synthase 3	315554
46	Ddx27	DEAD-box helicase 27	362274
47	Mybbp1a	MYB binding protein 1a	60571
48	Wdr89	WD repeat domain 89	314243
49	Dusp11	dual specificity phosphatase 11 (RNA/RNP complex 1-interacting)	297412
50	Nudcd1	NudC domain containing 1	362906
51	Prmt3	protein arginine methyltransferase 3	89820
52	Psmg2	proteasome assembly chaperone 2	291539
53	Eif2b3	eukaryotic translation initiation factor 2B subunit gamma	171145
54	Bbs12	Bardet-Biedl syndrome 12	365770
55	Rad23a	RAD23 homolog A: nucleotide excision repair protein	361381
56	Cad	carbamoyl-phosphate synthetase 2: aspartate transcarbamylase: and dihydroorotase	24240
57	Ubiad1	UbiA prenyltransferase domain containing 1	313706
58	Eif2d	eukaryotic translation initiation factor 2D	498225
59	Snupn	snurportin 1	316108
60	Dph5	diphthamide biosynthesis 5	295394
61	Utp6	UTP6 small subunit processome component	360574
62	Tefm	transcription elongation factor: mitochondrial	287554
63	Noc2l	NOC2-like nucleolar associated transcriptional repressor	313777
64	Trmt10a	tRNA methyltransferase 10A	295496
65	Ddx49	DEAD-box helicase 49	290660
66	Pus1	pseudouridylate synthase 1	304567
67	Ube2f	ubiquitin-conjugating enzyme E2F (putative)	363284
68	Cct2	chaperonin containing TCP1 subunit 2	299809
69	Det1	DET1: COP1 ubiquitin ligase partner	308775
70	Coa4	cytochrome c oxidase assembly factor 4 homolog	499214
71	Med20	mediator complex subunit 20	316209
72	Fam136a	family with sequence similarity 136: member A	297415
73	Nol11	nucleolar protein 11	688885
74	Xpnpep3	X-prolyl aminopeptidase 3	685823
75	Ftsj3	FtsJ RNA methyltransferase homolog 3	303608
76	Mdn1	midasin AAA ATPase 1	362498
77	Exosc1	exosome component 1	679140
78	Mmachc	methylmalonic aciduria (cobalamin deficiency) cblC type: with homocystinuria	313520
79	Chchd4	coiled-coil-helix-coiled-coil-helix domain containing 4	312559
80	Ddx56	DEAD-box helicase 56	289780
81	Bysl	bystin-like	359727
82	Dcps	decapping enzyme: scavenger	266605
83	Utp11	UTP11: small subunit processome component	313581
84	Zc3h8	zinc finger CCCH type containing 8	311414
85	Nop2	NOP2 nucleolar protein	314969
86	Dimt1	DIM1 dimethyladenosine transferase 1 homolog	294718
87	Ptrh2	peptidyl-tRNA hydrolase 2	287593
88	Wdr46	WD repeat domain 46	309628
89	Mrpl17	mitochondrial ribosomal protein L17	171061
90	Cbwd1	COBW domain containing 1	171057
91	Nat10	N-acetyltransferase 10	311257
92	Sssca1	Sjogren syndrome/scleroderma autoantigen 1	689397
93	Wdr75	WD repeat domain 75	314545
94	Hspbap1	HSPB1 associated protein 1	171460
95	Fam208b	family with sequence similarity 208: member B	361269
96	Heatr6	HEAT repeat containing 6	497972
97	Ruvbl1	RuvB-like AAA ATPase 1	65137
98	Tbrg1	transforming growth factor beta regulator 1	300521
99	Nufip1	NUFIP1: FMR1 interacting protein 1	364430
100	Wdr3	WD repeat domain 3	310720
101	Pggt1b	protein geranylgeranyltransferase type 1 subunit beta	81746
102	Srp68	signal recognition particle 68	363707
103	Vps37a	VPS37A: ESCRT-I subunit	290775
104	Nup43	nucleoporin 43	683983
105	Trmt10b	tRNA methyltransferase 10B	298081
106	Psma1	proteasome subunit alpha 1	29668
107	Nup54	nucleoporin 54	53372
108	Trub1	TruB pseudouridine synthase family member 1	361775
109	Trmt1l	tRNA methyltransferase 1-like	304851
110	Aatf	apoptosis antagonizing transcription factor	114512
111	Rhbdd1	rhomboid domain containing 1	316557
112	Rangrf	RAN guanine nucleotide release factor	287419
113	Polr1b	RNA polymerase I subunit B	83582
114	Wdr92	WD repeat domain 92	498418
115	Smarcb1	SWI/SNF related: matrix associated: actin dependent regulator of chromatin: subfamily b: member 1	361825
116	Tbl3	transducin (beta)-like 3	287120
117	Polr3b	RNA polymerase III subunit B	362858
118	Ltv1	LTV1 ribosome biogenesis factor	361452
119	Eif2s1	eukaryotic translation initiation factor 2 subunit alpha	54318
120	Lsm10	LSM10: U7 small nuclear RNA associated	366468
121	Lsg1	large 60S subunit nuclear export GTPase 1	288029
122	Mgme1	mitochondrial genome maintenance exonuclease 1	296200
123	Tceanc2	transcription elongation factor A N-terminal and central domain containing 2	366431
124	Jmjd6	arginine demethylase and lysine hydroxylase	360665
125	Ddx18	DEAD-box helicase 18	308490
126	Gin1	gypsy retrotransposon integrase 1	316687
127	Prmt5	protein arginine methyltransferase 5	364382
128	Mre11a	MRE11 homolog A: double strand break repair nuclease	64046
129	Mrm3	mitochondrial rRNA methyltransferase 3	360569
130	Nle1	notchless homolog 1	303372
131	Stip1	stress-induced phosphoprotein 1	192277
132	Gart	phosphoribosylglycinamide formyltransferase: phosphoribosylglycinamide synthetase: phosphoribosylaminoimidazole synthetase	288259
133	Rrp1b	ribosomal RNA processing 1B	309673
134	Gstcd	glutathione S-transferase: C-terminal domain containing	310855
135	Pwp2	PWP2: small subunit processome component	690297
136	Srsf10	serine and arginine rich splicing factor 10	362630
137	Parn	poly(A)-specific ribonuclease	360464
138	Tmem39a	transmembrane protein 39a	288092
139	Rars	arginyl-tRNA synthetase	287191
140	Eif3l	eukaryotic translation initiation factor 3: subunit L	300069
141	Ptcd1	pentatricopeptide repeat domain 1	304278
142	Alg8	ALG8: alpha-1:3-glucosyltransferase	293129
143	Tsr1	TSR1: ribosome maturation factor	100360406
144	Nol9	nucleolar protein 9	313744
145	Mrps2	mitochondrial ribosomal protein S2	362094
146	Spata5l1	spermatogenesis associated 5-like 1	691729
147	Tma16	translation machinery associated 16 homolog	290686
148	Eif1a	eukaryotic translation initiation factor 1A	317163
149	Zpr1	ZPR1 zinc finger	500989
150	Gemin4	gem (nuclear organelle) associated protein 4	497958
151	Hcfc2	host cell factor C2	314704
152	Hsf1	heat shock transcription factor 1	79245
153	Atad3a	ATPase family: AAA domain containing 3A	298682
154	Fam98a	family with sequence similarity 98: member A	313873
155	Tti2	TELO2 interacting protein 2	290811
156	Alkbh1	alkB homolog 1: histone H2A dioxygenase	362766
157	LOC686616	similar to gem (nuclear organelle) associated protein 5	686616
158	Sf3a3	splicing factor 3a: subunit 3	313583
159	Eif3m	eukaryotic translation initiation factor 3: subunit M	295975
160	Arl14ep	ADP-ribosylation factor like GTPase 14 effector protein	311279
161	Trit1	tRNA isopentenyltransferase 1	362586
162	Prmt7	protein arginine methyltransferase 7	361402
163	Ddx28	DEAD-box helicase 28	364995
164	Farsa	phenylalanyl-tRNA synthetase: alpha subunit	288917
165	Tut1	terminal uridylyl transferase 1: U6 snRNA-specific	499314
166	Stoml2	stomatin like 2	298203
167	Imp4	IMP4: U3 small nucleolar ribonucleoprotein	316317
168	MGC116121	similar to RIKEN cDNA 2700062C07	498830
169	Cstf1	cleavage stimulation factor subunit 1	311670
170	Eif3d	eukaryotic translation initiation factor 3: subunit D	362952
171	Exosc2	exosome component 2	366017
172	Nupl2	nucleoporin like 2	499974
173	Slc25a19	solute carrier family 25 member 19	303676
174	Sgf29	SAGA complex associated factor 29	293488
175	Mettl17	methyltransferase like 17	305845
176	Srm	spermidine synthase	84596
177	Ptges3	prostaglandin E synthase 3	362809
178	Golga3	golgin A3	312077
179	Ascc1	activating signal cointegrator 1 complex subunit 1	294512
180	Xpo5	exportin 5	363194
181	Elp6	elongator acetyltransferase complex subunit 6	363150
182	Phb	prohibitin	25344
183	Nup35	nucleoporin 35	295692
184	Naa16	N(alpha)-acetyltransferase 16: NatA auxiliary subunit	686240
185	Mettl21a	methyltransferase like 21A	102553119
186	Trmt1	tRNA methyltransferase 1	288914
187	Drg1	developmentally regulated GTP binding protein 1	305470
188	Utp4	UTP4 small subunit processome component	291987
189	Supv3l1	Suv3 like RNA helicase	294385
190	Spata5	spermatogenesis associated 5	361935
191	Mrpl49	mitochondrial ribosomal protein L49	309176
192	Krr1	KRR1: small subunit processome component homolog	314830
193	Sdccag3	serologically defined colon cancer antigen 3	306322
194	Setd4	SET domain containing 4	245975
195	Cdk10	cyclin-dependent kinase 10	361434
196	Rnps1	RNA binding protein with serine rich domain 1	287113
197	Kat2a	lysine acetyltransferase 2A	303539
198	Nsun5	NOP2/Sun RNA methyltransferase family member 5	288595
199	Eogt	EGF domain specific O-linked N-acetylglucosamine transferase	494219
200	Ppil3	peptidylprolyl isomerase like 3	301432
201	Scfd1	sec1 family domain containing 1	54350
202	Tardbp	TAR DNA binding protein	298648
203	Zfp444	zinc finger protein 444	292569
204	Mtrf1	mitochondrial translation release factor 1	686234
205	Rrp15	ribosomal RNA processing 15 homolog	360895
206	Arih2	ariadne RBR E3 ubiquitin protein ligase 2	316005
207	Thg1l	tRNA-histidine guanylyltransferase 1-like	303067
208	Trmu	tRNA 5-methylaminomethyl-2-thiouridylate methyltransferase	362976
209	Faap20	Fanconi anemia core complex associated protein 20	362678
210	Mrps18b	mitochondrial ribosomal protein S18B	294230
211	Nol12	nucleolar protein 12	362955
212	Adal	adenosine deaminase-like	311352
213	Pusl1	pseudouridylate synthase-like 1	362681
214	Szrd1	SUZ RNA binding domain containing 1	500575
215	Rrp12	ribosomal RNA processing 12 homolog	679127
216	Heatr5a	HEAT repeat containing 5A	362737
217	Slc30a6	solute carrier family 30 member 6	298786
218	Otud6b	OTU domain containing 6B	297911
219	LOC688235	similar to Nucleolar protein 11	688235
220	Ears2	glutamyl-tRNA synthetase 2: mitochondrial	361641
221	Mrto4	MRT4 homolog: ribosome maturation factor	298586
222	Tubgcp5	tubulin: gamma complex associated protein 5	308663
223	Pomgnt1	protein O-linked mannose N-acetylglucosaminyltransferase 1 (beta 1:2-)	362567
224	Iars	isoleucyl-tRNA synthetase	306804
225	Pla2g4b	phospholipase A2 group IVB	311341
226	Rpusd4	RNA pseudouridylate synthase domain containing 4	315550
227	Mlx	MLX: MAX dimerization protein	360631
228	Ppid	peptidylprolyl isomerase D	361967
229	Polr2c	RNA polymerase II subunit C	361365
230	Apex1	apurinic/apyrimidinic endodeoxyribonuclease 1	79116
231	Ubxn4	UBX domain protein 4	304766
232	Kti12	KTI12 chromatin associated homolog	685656
233	Dph1	diphthamide biosynthesis 1	287523
234	Gtf2f2	general transcription factor IIF subunit 2	81674
235	Dtwd1	DTW domain containing 1	296119
236	Dus2	dihydrouridine synthase 2	291978
237	Mtpap	mitochondrial poly(A) polymerase	307050
238	Hnrnpc	heterogeneous nuclear ribonucleoprotein C	290046
239	Tcof1	treacle ribosome biogenesis factor 1	291571
240	Wdr4	WD repeat domain 4	690032
241	Apip	APAF1 interacting protein	295961
242	Dhx15	DEAH-box helicase 15	289693
243	Pmm2	phosphomannomutase 2	302915
244	Eif3g	eukaryotic translation initiation factor 3: subunit G	298700
245	Cct4	chaperonin containing TCP1 subunit 4	29374
246	Dguok	deoxyguanosine kinase	297389
247	Ddx51	DEAD-box helicase 51	304570
248	Alg9	ALG9: alpha-1:2-mannosyltransferase	367083
249	Isg20l2	interferon stimulated exonuclease gene 20-like 2	361977
250	Pigw	phosphatidylinositol glycan anchor biosynthesis: class W	378774
251	Pdcd11	programmed cell death 11	309458
252	Rexo4	REX4 homolog: 3'-5' exonuclease	311826
253	Cops4	COP9 signalosome subunit 4	360915
254	Hemk1	HemK methyltransferase family member 1	300989
255	Ogg1	8-oxoguanine DNA glycosylase	81528
256	Ubfd1	ubiquitin family domain containing 1	293454
257	RGD1562218	similar to RIKEN cDNA 0610039J04	292100
258	Dcaf1	DDB1 and CUL4 associated factor 1	315987
259	Zfp764	zinc finger protein 764	691885
260	Kdelc1	KDEL motif containing 1	316370
261	Fam206a	family with sequence similarity 206: member A	298018
262	Ptcd2	pentatricopeptide repeat domain 2	310025
263	Utp14a	UTP14A small subunit processome component	317579
264	Ccdc51	coiled-coil domain containing 51	316008
265	Mrps7	mitochondrial ribosomal protein S7	113958
266	Wars	tryptophanyl-tRNA synthetase	314442
267	Zcchc9	zinc finger CCHC-type containing 9	309986
268	Heatr1	HEAT repeat containing 1	361262
269	Eif3j	eukaryotic translation initiation factor 3: subunit J	691947
270	RGD1305089	similar to 1110008L16Rik protein	299050
271	Pum3	pumilio RNA-binding family member 3	499339
272	Pigv	phosphatidylinositol glycan anchor biosynthesis: class V	366478
273	Cinp	cyclin-dependent kinase 2-interacting protein	299334
274	Nop14	NOP14 nucleolar protein	289724
275	Iqcc	IQ motif containing C	682431
276	Sec24b	SEC24 homolog B: COPII coat complex component	295461
277	Luc7l	LUC7-like	360503
278	Nop56	NOP56 ribonucleoprotein	362214
279	Ints3	integrator complex subunit 3	361988
280	Atic	5-aminoimidazole-4-carboxamide ribonucleotide formyltransferase/IMP cyclohydrolase	81643
281	Polr1e	RNA polymerase I subunit E	313245
282	Wdr12	WD repeat domain 12	363237
283	Cpsf3	cleavage and polyadenylation specific factor 3	298916
284	Cacybp	calcyclin binding protein	289144
285	Mterf3	mitochondrial transcription termination factor 3	299514
286	Mak16	MAK16 homolog	306526
287	Prdm4	PR/SET domain 4	170820
288	Creb3	cAMP responsive element binding protein 3	298400
289	Ice2	interactor of little elongation complex ELL subunit 2	691379
290	Nudt13	nudix hydrolase 13	682978
291	Rrp8	ribosomal RNA processing 8	308911
292	Nop58	NOP58 ribonucleoprotein	60373
293	Washc1	WASH complex subunit 1	367328
294	Mrrf	mitochondrial ribosome recycling factor	311903
295	Taf4b	TATA-box binding protein associated factor 4b	291773
296	Rpl7l1	ribosomal protein L7-like 1	317275
297	Gmpr2	guanosine monophosphate reductase 2	192357
298	Mterf1	mitochondrial transcription termination factor 1	85261
299	RGD1304624	similar to RIKEN cDNA 2700097O09	314128
300	Ncbp1	nuclear cap binding protein subunit 1	298075

## Sheet: a.4
Rank	Gene	Function	Gene ID
1	PSMB4	proteasome subunit beta 4	429986
2	POLR2C	RNA polymerase II subunit C	415635
3	ILF2	interleukin enhancer binding factor 2	425709
4	MRPL46	mitochondrial ribosomal protein L46	415499
5	DAP3	death associated protein 3	425065
6	MRPS11	mitochondrial ribosomal protein S11	415498
7	DCPS	decapping enzyme: scavenger	419716
8	HDAC8	histone deacetylase 8	422182
9	CTPS1	CTP synthase 1	419561
10	STOML2Z	stomatin like 2-Z	427412
11	AIMP2	aminoacyl tRNA synthetase complex interacting multifunctional protein 2	769030
12	NKIRAS2	NFKB inhibitor interacting Ras like 2	420032
13	PSMA1	proteasome subunit alpha 1	395874
14	C1H12ORF73	chromosome 1 open reading frame: human C12orf73	772057
15	PSMC5	proteasome 26S subunit: ATPase 5	428274
16	C1QBP	complement C1q binding protein	395538
17	GRSF1	G-rich RNA sequence binding factor 1	422646
18	PTPMT1	protein tyrosine phosphatase: mitochondrial 1	423181
19	MTX2	metaxin 2	424138
20	NPEPL1	aminopeptidase-like 1	419314
21	TPI1	triosephosphate isomerase 1	396435
22	MED27	mediator complex subunit 27	417172
23	CNOT11	CCR4-NOT transcription complex subunit 11	418711
24	NIP7	NIP7: nucleolar pre-rRNA processing protein	415863
25	COMMD3	COMM domain containing 3	420507
26	COQ9	coenzyme Q9	415636
27	EXOSC1	exosome component 1	423844
28	METTL2A	methyltransferase like 2A	419948
29	MRPL58	mitochondrial ribosomal protein L58	422114
30	SNRNP48	small nuclear ribonucleoprotein U11/U12 subunit 48	420925
31	MRPS22	mitochondrial ribosomal protein S22	424824
32	ATPAF2	ATP synthase mitochondrial F1 complex assembly factor 2	416511
33	AURKAIP1	aurora kinase A interacting protein 1	419415
34	PSMB1	proteasome subunit beta 1	421551
35	LRRC20	leucine rich repeat containing 20	769461
36	SNRPC	small nuclear ribonucleoprotein polypeptide C	419901
37	WDR12	WD repeat domain 12	424089
38	TIMM23B	translocase of inner mitochondrial membrane 23 homolog B	423616
39	SMYD2	SET and MYND domain containing 2	421361
40	CCDC58	coiled-coil domain containing 58	418269
41	PHKG1	phosphorylase kinase catalytic subunit gamma 1	417543
42	GTF3A	general transcription factor IIIA	418931
43	THOC5	THO complex 5	417019
44	NOA1	nitric oxide associated 1	422622
45	HDDC2	HD domain containing 2	421719
46	PHB2	prohibitin 2	771124
47	REXO2	RNA exonuclease 2	419761
48	PSMB3	proteasome subunit beta 3	419997
49	NUBP1	nucleotide binding protein 1	416634
50	MRPL37	mitochondrial ribosomal protein L37	772313
51	HDGF	hepatoma-derived growth factor	776936
52	MRPL12	mitochondrial ribosomal protein L12	769031
53	RCL1	RNA terminal phosphate cyclase like 1	427222
54	MRPS31	mitochondrial ribosomal protein S31	418887
55	MCRS1	microspherule protein 1	426664
56	PRPS1	phosphoribosyl pyrophosphate synthetase 1	422185
57	IAH1	isoamyl acetate-hydrolyzing esterase 1 homolog	421930
58	PDCD2	programmed cell death 2	421550
59	NUDT16L1	nudix hydrolase 16 like 1	395557
60	ANAPC16	anaphase promoting complex subunit 16	423708
61	MRPS7	mitochondrial ribosomal protein S7	422122
62	COX16	COX16: cytochrome c oxidase assembly homolog	423257
63	DNTTIP1	deoxynucleotidyltransferase terminal interacting protein 1	431225
64	MAP2K2	mitogen-activated protein kinase kinase 2	396349
65	CTU2	cytosolic thiouridylase subunit 2	415850
66	MRPL18	mitochondrial ribosomal protein L18	421585
67	SURF2	surfeit 2	417156
68	SIMC1	SUMO interacting motifs containing 1	416231
69	MAK16	MAK16 homolog	426924
70	MRPS18A	mitochondrial ribosomal protein S18A	421445
71	TAF7	TATA-box binding protein associated factor 7	422192
72	PSMC2	proteasome 26S subunit: ATPase 2	417716
73	PSMD7	proteasome 26S subunit: non-ATPase 7	415869
74	PARK7	Parkinson disease (autosomal recessive: early onset) 7	395277
75	CCDC86	coiled-coil domain containing 86	425097
76	KANSL3	KAT8 regulatory NSL complex subunit 3	426585
77	PNO1	partner of NOB1 homolog	769547
78	ADRM1	adhesion regulating molecule 1	395365
79	MAD2L2	MAD2 mitotic arrest deficient-like 2 (yeast)	419493
80	CAPZB	capping actin protein of muscle Z-line beta subunit	396418
81	RFC2	replication factor C subunit 2	396542
82	PPP1CA	protein phosphatase 1 catalytic subunit alpha	100858156
83	DPY30	dpy-30: histone methyltransferase complex regulatory subunit	421482
84	TAF12	TATA-box binding protein associated factor 12	419585
85	NMT1	N-myristoyltransferase 1	419966
86	WDR3	WD repeat domain 3	427952
87	SMARCB1	SWI/SNF related: matrix associated: actin dependent regulator of chromatin: subfamily b: member 1	378892
88	PPIL3	peptidylprolyl isomerase like 3	424075
89	GPN3	GPN-loop GTPase 3	427696
90	MRPL13	mitochondrial ribosomal protein L13	420356
91	WDR77	WD repeat domain 77	419865
92	MRPL57	mitochondrial ribosomal protein L57	771615
93	SDHB	succinate dehydrogenase complex: subunit B: iron sulfur (Ip)	770063
94	PGAM1	phosphoglycerate mutase 1	428969
95	TMEM11	transmembrane protein 11	427663
96	BYSL	bystin like	419927
97	SAP18	Sin3A associated protein 18	374206
98	MPI	mannose phosphate isomerase	769765
99	NDUFS7	NADH:ubiquinone oxidoreductase core subunit S7	770724
100	AN1ZNF5L	AN1-type zinc finger protein 5-like	426626
101	LOC416995	uncharacterized LOC416995	416995
102	NDUFB4	NADH dehydrogenase (ubiquinone) 1 beta subcomplex: 4: 15kDa	769954
103	MRM3	mitochondrial rRNA methyltransferase 3	417620
104	UTP11	UTP11: small subunit processome component homolog (S. cerevisiae)	419606
105	RPP40	ribonuclease P/MRP subunit p40	420876
106	TYW5	tRNA-yW synthesizing protein 5	424065
107	MRPL10	mitochondrial ribosomal protein L10	426521
108	POLR2L	RNA polymerase II subunit L	770704
109	SNRNP27	small nuclear ribonucleoprotein U4/U6.U5 subunit 27	771295
110	UQCRFS1	ubiquinol-cytochrome c reductase: Rieske iron-sulfur polypeptide 1	415752
111	MRPL48	mitochondrial ribosomal protein L48	419062
112	NOP2	NOP2 nucleolar protein	418277
113	PDCD2L	programmed cell death 2-like	415785
114	MRPS25	mitochondrial ribosomal protein S25	416129
115	MRPL42	mitochondrial ribosomal protein L42	417899
116	DTD1	D-tyrosyl-tRNA deacylase 1	416726
117	FASTKD2	FAST kinase domains 2	424096
118	IMPDH2	inosine monophosphate dehydrogenase 2	416058
119	CHCHD3	coiled-coil-helix-coiled-coil-helix domain containing 3	418435
120	CRLS1	cardiolipin synthase 1	428559
121	ATP5B	ATP synthase: H+ transporting: mitochondrial F1 complex: beta polypeptide	426673
122	PDCL3	phosducin like 3	418709
123	MRPL41	mitochondrial ribosomal protein L41	417261
124	COPS7B	COP9 signalosome subunit 7B	424933
125	SNRPG	small nuclear ribonucleoprotein polypeptide G	771344
126	GPN1	GPN-loop GTPase 1	421980
127	NDUFAF6	NADH dehydrogenase (ubiquinone) complex I: assembly factor 6	420233
128	SF3B5	splicing factor 3b subunit 5	769794
129	GEMIN2	gem nuclear organelle associated protein 2	423336
130	NAE1	NEDD8 activating enzyme E1 subunit 1	415792
131	MINA	MYC induced nuclear antigen	418436
132	NAA40	N(alpha)-acetyltransferase 40: NatD catalytic subunit	430563
133	MRPL20	mitochondrial ribosomal protein L20	770979
134	CCT5	chaperonin containing TCP1 subunit 5	420930
135	HTRA2	HtrA serine peptidase 2	395990
136	TMCO6	transmembrane and coiled-coil domains 6	416135
137	POLR2I	RNA polymerase II subunit I	426289
138	FCF1	FCF1 rRNA-processing protein	423355
139	SPOUT1	SPOUT domain containing methyltransferase 1	417203
140	MALSU1	mitochondrial assembly of ribosomal large subunit 1	420616
141	SNX27	sorting nexin family member 27	425666
142	PSMD6	proteasome 26S subunit: non-ATPase 6	416079
143	TRNT1	tRNA nucleotidyl transferase 1	416103
144	PPM1G	protein phosphatase: Mg2+/Mn2+ dependent 1G	421986
145	ABCF2	ATP binding cassette subfamily F member 2	426038
146	PTP4A2	protein tyrosine phosphatase type IVA: member 2	419649
147	ALKBH8	alkB homolog 8: tRNA methyltransferase	418972
148	GLRX2	glutaredoxin 2	424357
149	RRP9	ribosomal RNA processing 9: small subunit (SSU) processome component: homolog (yeast)	415888
150	POLR2F	RNA polymerase II subunit F	395486
151	RPP38	ribonuclease P/MRP subunit p38	420530
152	C5H14ORF169	chromosome 5 open reading frame: human C14orf169	423249
153	MRPS2	mitochondrial ribosomal protein S2	417140
154	PSMA5	proteasome subunit alpha 5	426937
155	THOC3	THO complex 3	416232
156	COPS7A	COP9 signalosome subunit 7A	418283
157	POLR2E	RNA polymerase II subunit E	420103
158	IK	IK cytokine: down-regulator of HLA II	416133
159	TMEM39B	transmembrane protein 39B	419650
160	NSUN4	NOP2/Sun RNA methyltransferase family member 4	424613
161	TWISTNB	TWIST neighbor	420603
162	MRPS9	mitochondrial ribosomal protein S9	418723
163	SSBP1	single stranded DNA binding protein 1	418122
164	POLR2D	RNA polymerase II subunit D	424754
165	SNRPA1	small nuclear ribonucleoprotein polypeptide A'	415523
166	PHB	prohibitin	419980
167	SETD6	SET domain containing 6	415675
168	PSMB7	proteasome subunit beta 7	378915
169	GAPDH	glyceraldehyde-3-phosphate dehydrogenase	374193
170	TWNK	twinkle mtDNA helicase	425626
171	PTGES2	prostaglandin E synthase 2	417214
172	PA2G4	proliferation-associated 2G4: 38kDa	425279
173	CDC23	cell division cycle 23	771857
174	COX18	COX18: cytochrome c oxidase assembly factor	422650
175	SNUPN	snurportin 1	770225
176	MRPS28	mitochondrial ribosomal protein S28	770322
177	DCTN6	dynactin subunit 6	771257
178	MRPS35	mitochondrial ribosomal protein S35	419048
179	NDUFAF7	NADH:ubiquinone oxidoreductase complex assembly factor 7	421477
180	MTA3	metastasis associated 1 family member 3	421395
181	COQ6	coenzyme Q6: monooxygenase	423342
182	NDUFV2	NADH:ubiquinone oxidoreductase core subunit V2	426488
183	NUP37	nucleoporin 37	418093
184	NUTF2	nuclear transport factor 2	415655
185	G3BP1	G3BP stress granule assembly factor 1	416265
186	AGK	acylglycerol kinase	418121
187	KHDRBS1	KH RNA binding domain containing: signal transduction associated 1	374071
188	VPS25	vacuolar protein sorting 25 homolog	420021
189	POP5	POP5 homolog: ribonuclease P/MRP subunit	416973
190	ATP5J2-PTCD1	ATP5J2-PTCD1 readthrough	416493
191	MSTO1	misato 1: mitochondrial distribution and morphology regulator	425066
192	NOL7	nucleolar protein 7	420835
193	DUS1L	dihydrouridine synthase 1 like	417381
194	MED30	mediator complex subunit 30	420284
195	SNF8	SNF8: ESCRT-II complex subunit	419990
196	NSMCE1	NSE1 homolog: SMC5-SMC6 complex component	416584
197	PSMD4	proteasome 26S subunit: non-ATPase 4	100216364
198	SNRPL	small nuclear ribonucleoprotein polypeptide-like	395298
199	MED24	mediator complex subunit 24	426134
200	FH	fumarate hydratase	420969
201	EXOC7	exocyst complex component 7	417361
202	DENR	density regulated re-initiation and release factor	771794
203	NDUFS3	NADH:ubiquinone oxidoreductase core subunit S3	423179
204	C5H14orf166	chromosome 5 C14orf166 homolog	396326
205	FAM207A	family with sequence similarity 207 member A	424042
206	CHCHD7	coiled-coil-helix-coiled-coil-helix domain containing 7	770709
207	EIF1	eukaryotic translation initiation factor 1	420037
208	NDUFB9	NADH:ubiquinone oxidoreductase subunit B9	420337
209	UFD1L	ubiquitin fusion degradation 1 like (yeast)	374186
210	C26H6ORF125	chromosome 26 open reading frame: human C6orf125	419909
211	C21H1orf174	chromosome 21 C1orf174 homolog	419378
212	NDUFA8	NADH:ubiquinone oxidoreductase subunit A8	417112
213	PDRG1	p53 and DNA damage regulated 1	771852
214	TSEN15	tRNA splicing endonuclease subunit 15	424448
215	APTX	aprataxin	395173
216	COPS8	COP9 signalosome subunit 8	424020
217	MRPS5	mitochondrial ribosomal protein S5	416706
218	DNPEP	aspartyl aminopeptidase	424200
219	MRTO4	MRT4 homolog: ribosome maturation factor	428192
220	ATP5L	ATP synthase: H+ transporting: mitochondrial Fo complex: subunit G	770052
221	ZNF639	zinc finger protein 639	425280
222	CINP	cyclin dependent kinase 2 interacting protein	423467
223	EIF3I	eukaryotic translation initiation factor 3 subunit I	419653
224	CHURC1	churchill domain containing 1	395448
225	CHCHD2	coiled-coil-helix-coiled-coil-helix domain containing 2	417544
226	MED19	mediator complex subunit 19	428854
227	UTP20	UTP20: small subunit processome component	417933
228	RTN4IP1	reticulon 4 interacting protein 1	421782
229	NDUFA6	NADH:ubiquinone oxidoreductase subunit A6	427897
230	LOC423321	uncharacterized LOC423321	423321
231	NDUFB10	NADH:ubiquinone oxidoreductase subunit B10	416543
232	IFFO1	intermediate filament family orphan 1	418276
233	PSMA3	proteasome subunit alpha 3	423542
234	MRPL45	mitochondrial ribosomal protein L45	426233
235	TMA16	translation machinery associated 16 homolog	770087
236	ATP5H	ATP synthase: H+ transporting: mitochondrial Fo complex subunit D	422115
237	MRPS23	mitochondrial ribosomal protein S23	417666
238	RACK1	receptor for activated C kinase 1	417044
239	NOP56	NOP56 ribonucleoprotein	426574
240	COA6	cytochrome c oxidase assembly factor 6	771652
241	WDR34	WD repeat domain 34	417211
242	PSMA7	proteasome subunit alpha 7	395318
243	MTFP1	mitochondrial fission process 1	417007
244	PRDX3	peroxiredoxin 3	428986
245	C6H10ORF88	chromosome 6 open reading frame: human C10orf88	427084
246	MRPS34	mitochondrial ribosomal protein S34	426987
247	GPI	glucose-6-phosphate isomerase	415783
248	POLL	DNA polymerase lambda	423853
249	ZNHIT3	zinc finger HIT-type containing 3	100859083
250	TAF15	TATA-box binding protein associated factor 15	417522
251	TRAP1	TNF receptor associated protein 1	416666
252	PPID	peptidylprolyl isomerase D	428725
253	EMC6	ER membrane protein complex subunit 6	417604
254	HEATR3	HEAT repeat containing 3	415734
255	DDX54	DEAD-box helicase 54	416992
256	AIFM1	apoptosis inducing factor: mitochondria associated 1	428688
257	PHPT1	phosphohistidine phosphatase 1	770750
258	RBX1	ring-box 1	418001
259	UROD	uroporphyrinogen decarboxylase	424590
260	MRPL35	mitochondrial ribosomal protein L35	422913
261	PPP6C	protein phosphatase 6 catalytic subunit	772354
262	PFDN5	prefoldin subunit 5	100859376
263	PUF60	poly(U) binding splicing factor 60	426402
264	UTP14A	UTP14A small subunit processome component	422140
265	AK1	adenylate kinase 1	396002
266	RPL32	ribosomal protein L32	416122
267	MEAF6	MYST/Esa1 associated factor 6	419617
268	PDDC1	Parkinson disease 7 domain containing 1	423020
269	MTO1	mitochondrial tRNA translation optimization 1	772297
270	GOT2	glutamic-oxaloacetic transaminase 2	396533
271	EIF1AD	eukaryotic translation initiation factor 1A domain containing	414740
272	ENDOG	endonuclease G	417204
273	SDHAF2	succinate dehydrogenase complex assembly factor 2	426015
274	ECHDC3	enoyl-CoA hydratase domain containing 3	419098
275	NOL9	nucleolar protein 9	770191
276	SNU13	SNU13 homolog: small nuclear ribonucleoprotein (U4/U6.U5)	417986
277	LRRC47	leucine rich repeat containing 47	419380
278	KXD1	KxDL motif containing 1	771070
279	IFT52	intraflagellar transport 52	419165
280	PRPF38A	pre-mRNA processing factor 38A	771795
281	LOC424919	deoxyribodipyrimidine photo-lyase-like	424919
282	MARS	methionyl-tRNA synthetase	425613
283	CYB5D2	cytochrome b5 domain containing 2	417495
284	HDGFRP2	hepatoma-derived growth factor-related protein 2	772302
285	SMIM11	small integral membrane protein 11	770806
286	PSMC3	proteasome 26S subunit: ATPase 3	423182
287	ORC2	origin recognition complex subunit 2	424077
288	TMEM42	transmembrane protein 42	420707
289	MRPL3	mitochondrial ribosomal protein L3	420686
290	CHMP7	charged multivesicular body protein 7	419535
291	LRRC59	leucine rich repeat containing 59	422103
292	BORCS7	BLOC-1 related complex subunit 7	423869
293	NSMCE3	NSE3 homolog: SMC5-SMC6 complex component	100125831
294	TNPO3	transportin 3	426277
295	DKC1	dyskerin pseudouridine synthase 1	422196
296	CLP1	cleavage and polyadenylation factor I subunit 1	423131
297	VPS37C	VPS37C: ESCRT-I subunit	423023
298	SLC25A3	solute carrier family 25 member 3	417924
299	GTF3C6	general transcription factor IIIC subunit 6	421754
300	OLA1	Obg like ATPase 1	424144

## Sheet: a.5
Rank	Gene	Function	Gene ID
1	rtcb	RNA 2':3'-cyclic phosphate and 5'-OH ligase	406376
2	nae1	nedd8 activating enzyme E1 subunit 1	573336
3	bcs1l	BC1 (ubiquinol-cytochrome c reductase) synthesis-like	394157
4	tufm	Tu translation elongation factor: mitochondrial	541378
5	cdk5rap3	CDK5 regulatory subunit associated protein 3	415195
6	samm50	SAMM50 sorting and assembly machinery component	393111
7	pitrm1	pitrilysin metallopeptidase 1	406808
8	ufsp2	ufm1-specific peptidase 2	336782
9	atad3	ATPase family: AAA domain containing 3	403004
10	eif2b3	eukaryotic translation initiation factor 2B: subunit 3 gamma	394049
11	alg9	ALG9: alpha-1:2-mannosyltransferase	393598
12	nansa	N-acetylneuraminic acid synthase a	322780
13	anapc5	anaphase promoting complex subunit 5	322854
14	rars	arginyl-tRNA synthetase	337070
15	rtn4ip1	reticulon 4 interacting protein 1	393323
16	ddost	dolichyl-diphosphooligosaccharide--protein glycosyltransferase subunit (non-catalytic)	406408
17	mrpl35	mitochondrial ribosomal protein L35	767758
18	thop1	thimet oligopeptidase 1	436628
19	get4	golgi to ER traffic protein 4 homolog (S. cerevisiae)	796309
20	ipo4	importin 4	553305
21	znf277	zinc finger protein 277	393402
22	orc5	origin recognition complex: subunit 5	406479
23	farsb	phenylalanyl-tRNA synthetase: beta subunit	493608
24	pelo	pelota mRNA surveillance and ribosome rescue factor	394111
25	psmd4a	proteasome 26S subunit: non-ATPase 4a	415202
26	tamm41	TAM41 mitochondrial translocator assembly and maintenance homolog	641323
27	mrrf	mitochondrial ribosome recycling factor	431721
28	dap3	death associated protein 3	559007
29	hdhd2	haloacid dehalogenase-like hydrolase domain containing 2	541346
30	plaa	phospholipase A2-activating protein	324855
31	hspa4a	heat shock protein 4a	335865
32	ptcd3	pentatricopeptide repeat domain 3	553325
33	glrx3	glutaredoxin 3	449777
34	lap3	leucine aminopeptidase 3	562854
35	psmc2	proteasome 26S subunit: ATPase 2	393941
36	cog4	component of oligomeric golgi complex 4	569049
37	dpp3	dipeptidyl-peptidase 3	322527
38	clta	clathrin: light chain A	406318
39	preb	prolactin regulatory element binding	436911
40	dhx29	DEAH (Asp-Glu-Ala-His) box polypeptide 29	553505
41	mrpl57	mitochondrial ribosomal protein L57	393748
42	anapc2	anaphase promoting complex subunit 2	100318335
43	iars	isoleucyl-tRNA synthetase	334393
44	trmt2a	tRNA methyltransferase 2 homolog A	334936
45	hspa5	heat shock protein 5	378848
46	drg1	developmentally regulated GTP binding protein 1	336823
47	os9	osteosarcoma amplified 9: endoplasmic reticulum lectin	553455
48	gfm1	G elongation factor: mitochondrial 1	561840
49	srd5a3	steroid 5 alpha-reductase 3	560717
50	hspd1	heat shock 60 protein 1	282676
51	cmpk	cytidylate kinase	406383
52	chchd10	coiled-coil-helix-coiled-coil-helix domain containing 10	393757
53	pemt	phosphatidylethanolamine N-methyltransferase	393127
54	qars	glutaminyl-tRNA synthetase	394188
55	zgc:163107	zgc:163107	563454
56	abcf3	ATP-binding cassette: sub-family F (GCN20): member 3	100331227
57	ndufaf6	NADH dehydrogenase (ubiquinone) complex I: assembly factor 6	569692
58	uba5	ubiquitin-like modifier activating enzyme 5	386712
59	sumf2	sulfatase modifying factor 2	449807
60	phb2b	prohibitin 2b	436954
61	cops5	COP9 signalosome subunit 5	393698
62	prmt3	protein arginine methyltransferase 3	550348
63	fkbp2	FK506 binding protein 2	447939
64	dars2	aspartyl-tRNA synthetase 2: mitochondrial	571144
65	fnta	farnesyltransferase: CAAX box: alpha	555882
66	glod4	glyoxalase domain containing 4	447874
67	psmc4	proteasome 26S subunit: ATPase 4	326884
68	mrpl17	mitochondrial ribosomal protein L17	447945
69	nrd1a	nardilysin a (N-arginine dibasic convertase)	565850
70	usp14	ubiquitin specific peptidase 14 (tRNA-guanine transglycosylase)	335736
71	copb1	coatomer protein complex: subunit beta 1	338138
72	mrpl12	mitochondrial ribosomal protein L12	550391
73	wars	tryptophanyl-tRNA synthetase	393745
74	cars	cysteinyl-tRNA synthetase	368284
75	dnm1l	dynamin 1-like	393896
76	stt3a	STT3A: subunit of the oligosaccharyltransferase complex (catalytic)	266797
77	hacd3	3-hydroxyacyl-CoA dehydratase 3	393441
78	mcts1	malignant T cell amplified sequence 1	394046
79	psmd1	proteasome 26S subunit: non-ATPase 1	554967
80	ppa1b	pyrophosphatase (inorganic) 1b	550531
81	nup85	nucleoporin 85	445231
82	tbl2	transducin (beta)-like 2	337068
83	nomo	nodal modulator	446115
84	arf2b	ADP-ribosylation factor 2b	327026
85	arhgdia	Rho GDP dissociation inhibitor (GDI) alpha	406770
86	trappc11	trafficking protein particle complex 11	323003
87	got2b	glutamic-oxaloacetic transaminase 2b: mitochondrial	335974
88	mrps9	mitochondrial ribosomal protein S9	751681
89	mcfd2	multiple coagulation factor deficiency 2	449676
90	agps	alkylglycerone phosphate synthase	386801
91	polr3d	polymerase (RNA) III (DNA directed) polypeptide D	393257
92	atp5fa1	ATP synthase F1 subunit alpha	553755
93	kdelc1	KDEL (Lys-Asp-Glu-Leu) containing 1	393905
94	zgc:110782	zgc:110782	541358
95	aaas	achalasia: adrenocortical insufficiency: alacrimia	378454
96	hspa4b	heat shock protein 4b	334086
97	commd4	COMM domain containing 4	767771
98	foxred1	FAD-dependent oxidoreductase domain containing 1	556387
99	cct3	chaperonin containing TCP1: subunit 3 (gamma)	192327
100	ndufa10	NADH dehydrogenase (ubiquinone) 1 alpha subcomplex: 10	321951
101	mrpl3	mitochondrial ribosomal protein L3	336283
102	fip1l1b	FIP1 like 1b (S. cerevisiae)	450021
103	ndufab1b	NADH dehydrogenase (ubiquinone) 1: alpha/beta subcomplex: 1b	325712
104	gorasp2	golgi reassembly stacking protein 2	393676
105	stip1	stress-induced phosphoprotein 1	493606
106	fam136a	family with sequence similarity 136: member A	406709
107	rap1ab	RAP1A: member of RAS oncogene family b	406714
108	ostc	oligosaccharyltransferase complex subunit	393239
109	myg1	melanocyte proliferating gene 1	664752
110	mrpl11	mitochondrial ribosomal protein L11	436829
111	scfd1	sec1 family domain containing 1	317732
112	nudcd1	NudC domain containing 1	553654
113	aagab	alpha and gamma adaptin binding protein	436696
114	psmc5	proteasome 26S subunit: ATPase 5	445285
115	pdss2	prenyl (decaprenyl) diphosphate synthase: subunit 2	436624
116	focad	focadhesin	100150998
117	zgc:55781	zgc:55781	325979
118	commd9	COMM domain containing 9	562660
119	psmd11a	proteasome 26S subunit: non-ATPase 11a	503934
120	ap2m1a	adaptor-related protein complex 2: mu 1 subunit: a	321051
121	tmem147	transmembrane protein 147	436757
122	gdi2	GDP dissociation inhibitor 2	323765
123	adprhl2	ADP-ribosylhydrolase like 2	796446
124	LOC562285	similar to ring finger protein 121	562285
125	apooa	apolipoprotein O: a	641319
126	guf1	GUF1 homolog: GTPase	553030
127	rabl3	RAB: member of RAS oncogene family-like 3	403048
128	psmb3	proteasome subunit beta 3	573095
129	msh2	mutS homolog 2 (E. coli)	406845
130	mtx2	metaxin 2	286741
131	aurkaip1	aurora kinase A interacting protein 1	100126015
132	eif2b5	eukaryotic translation initiation factor 2B: subunit 5 epsilon	563613
133	psmb1	proteasome subunit beta 1	445413
134	pdia5	protein disulfide isomerase family A: member 5	556162
135	cct7	chaperonin containing TCP1: subunit 7 (eta)	192324
136	psma8	proteasome subunit alpha 8	406445
137	clns1a	chloride channel: nucleotide-sensitive: 1A	30699
138	psmd6	proteasome 26S subunit: non-ATPase 6	393261
139	aarsd1	alanyl-tRNA synthetase domain containing 1	445178
140	uqcrc1	ubiquinol-cytochrome c reductase core protein 1	393793
141	pdss1	prenyl (decaprenyl) diphosphate synthase: subunit 1	550349
142	ralaa	v-ral simian leukemia viral oncogene homolog Aa (ras related)	393993
143	mrpl27	mitochondrial ribosomal protein L27	553709
144	tbck	TBC1 domain containing kinase	791155
145	arfgap1	ADP-ribosylation factor GTPase activating protein 1	100149572
146	orc2	origin recognition complex: subunit 2	768161
147	wdr18	WD repeat domain 18	445819
148	wu:fb36b12	wu:fb36b12	321815
149	tars	threonyl-tRNA synthetase	449661
150	ogfod1	2-oxoglutarate and iron-dependent oxygenase domain containing 1	324573
151	wdr77	WD repeat domain 77	393506
152	uchl3	ubiquitin carboxyl-terminal esterase L3 (ubiquitin thiolesterase)	554104
153	psmb5	proteasome subunit beta 5	30387
154	heatr3	HEAT repeat containing 3	393863
155	hyou1	hypoxia up-regulated 1	327133
156	pa2g4b	proliferation-associated 2G4: b	323462
157	rfk	riboflavin kinase	560915
158	alg5	asparagine-linked glycosylation 5 (dolichyl-phosphate beta-glucosyltransferase)	751635
159	wdr34	WD repeat domain 34	794361
160	psmd14	proteasome 26S subunit: non-ATPase 14	799058
161	si:rp71-45k5.4	si:rp71-45k5.4	403015
162	hint1	histidine triad nucleotide binding protein 1	449551
163	kdelr2b	KDEL (Lys-Asp-Glu-Leu) endoplasmic reticulum protein retention receptor 2b	325464
164	timm44	translocase of inner mitochondrial membrane 44 homolog (yeast)	541380
165	cyp20a1	cytochrome P450: family 20: subfamily A: polypeptide 1	406641
166	tcp1	t-complex 1	30477
167	ciao1	cytosolic iron-sulfur assembly component 1	795104
168	ccdc51	coiled-coil domain containing 51	751752
169	setd6	SET domain containing 6	322348
170	tmem214	transmembrane protein 214	402840
171	cyc1	cytochrome c-1	564379
172	psmc1a	proteasome 26S subunit: ATPase 1a	336786
173	vcp	valosin containing protein	327197
174	exosc2	exosome component 2	550234
175	eif2b1	eukaryotic translation initiation factor 2B: subunit 1 alpha	415150
176	qdprb1	quinoid dihydropteridine reductase b1	791448
177	copa	coatomer protein complex: subunit alpha	260439
178	dctn5	dynactin 5	436770
179	mogs	mannosyl-oligosaccharide glucosidase	567913
180	si:dkey-17e16.10	si:dkey-17e16.10	793878
181	cltcb	clathrin: heavy chain b (Hc)	503600
182	gmppaa	GDP-mannose pyrophosphorylase Aa	431743
183	eef1e1	eukaryotic translation elongation factor 1 epsilon 1	565440
184	mrpl46	mitochondrial ribosomal protein L46	436791
185	eif2a	eukaryotic translation initiation factor 2A	573991
186	clpp	caseinolytic mitochondrial matrix peptidase proteolytic subunit	553713
187	sec23a	Sec23 homolog A: COPII coat complex component	406774
188	denr	density-regulated protein	436970
189	flvcr2b	feline leukemia virus subgroup C cellular receptor family: member 2b	569329
190	mrpl41	mitochondrial ribosomal protein L41	553805
191	emc2	ER membrane protein complex subunit 2	407073
192	slc35b1	solute carrier family 35: member B1	447844
193	atp5f1b	ATP synthase F1 subunit beta	554135
194	tuba8l	tubulin: alpha 8 like	337223
195	psmc6	proteasome 26S subunit: ATPase 6	321585
196	cope	coatomer protein complex: subunit epsilon	492492
197	sars	seryl-tRNA synthetase	445405
198	pigs	phosphatidylinositol glycan anchor biosynthesis: class S	767675
199	hectd3	HECT domain containing 3	563189
200	nudc	nudC nuclear distribution protein	393893
201	akr1a1b	aldo-keto reductase family 1: member A1b (aldehyde reductase)	799805
202	si:dkey-175g6.5	si:dkey-175g6.5	100000122
203	abcb7	ATP-binding cassette: sub-family B (MDR/TAP): member 7	566515
204	abcb8	ATP-binding cassette: sub-family B (MDR/TAP): member 8	548340
205	mrps14	mitochondrial ribosomal protein S14	751639
206	mrps17	mitochondrial ribosomal protein S17	553580
207	arl2	ADP-ribosylation factor-like 2	449774
208	psmc3	proteasome 26S subunit: ATPase 3	321947
209	ccdc58	coiled-coil domain containing 58	393780
210	lcmt1	leucine carboxyl methyltransferase 1	447907
211	cdk16	cyclin-dependent kinase 16	559750
212	mrps18a	mitochondrial ribosomal protein S18A	558080
213	ovca2	OVCA2: serine hydrolase domain containing	553576
214	smyd5	SMYD family member 5	447875
215	eif4eb	eukaryotic translation initiation factor 4eb	493617
216	mrpl37	mitochondrial ribosomal protein L37	567819
217	zgc:153901	zgc:153901	767707
218	vars	valyl-tRNA synthetase	114427
219	ufl1	UFM1-specific ligase 1	393578
220	eif2d	eukaryotic translation initiation factor 2D	394137
221	atp5mc1	ATP synthase membrane subunit c locus 1	406301
222	hspbp1	HSPA (heat shock 70kDa) binding protein: cytoplasmic cochaperone 1	338155
223	mrps31	mitochondrial ribosomal protein S31	407642
224	eefsec	eukaryotic elongation factor: selenocysteine-tRNA-specific	641497
225	gars	glycyl-tRNA synthetase	337230
226	pus10	pseudouridylate synthase 10	566689
227	bdh2	3-hydroxybutyrate dehydrogenase: type 2	550507
228	mrpl14	mitochondrial ribosomal protein L14	394122
229	nup133	nucleoporin 133	406852
230	bcap31	B cell receptor associated protein 31	368488
231	rwdd1	RWD domain containing 1	436808
232	slc25a26	solute carrier family 25 (S-adenosylmethionine carrier): member 26	560478
233	blmh	bleomycin hydrolase	336541
234	eif2b2	eukaryotic translation initiation factor 2B: subunit 2 beta	405839
235	mmab	methylmalonic aciduria (cobalamin deficiency) cblB type	557077
236	trip4	thyroid hormone receptor interactor 4	568585
237	mtx1b	metaxin 1b	286740
238	yars	tyrosyl-tRNA synthetase	368235
239	ddx1	DEAD (Asp-Glu-Ala-Asp) box helicase 1	556790
240	ldah	lipid droplet associated hydrolase	566336
241	cbr1l	carbonyl reductase 1-like	337696
242	alad	aminolevulinate dehydratase	550338
243	uqcc2	ubiquinol-cytochrome c reductase complex assembly factor 2	393731
244	prdx4	peroxiredoxin 4	570477
245	timm29	translocase of inner mitochondrial membrane 29	553583
246	itfg2	integrin alpha FG-GAP repeat containing 2	550607
247	pdia6	protein disulfide isomerase family A: member 6	322160
248	bloc1s2	biogenesis of lysosomal organelles complex-1: subunit 2	606665
249	prmt5	protein arginine methyltransferase 5	368664
250	jagn1b	jagunal homolog 1b	445190
251	cpt2	carnitine palmitoyltransferase 2	100005717
252	nadk2	NAD kinase 2: mitochondrial	445071
253	taldo1	transaldolase 1	324556
254	coa7	cytochrome c oxidase assembly factor 7	555268
255	kntc1	kinetochore associated 1	497376
256	sco1	SCO1 cytochrome c oxidase assembly protein	796572
257	zgc:113305	zgc:113305	553815
258	mrpl49	mitochondrial ribosomal protein L49	558658
259	naa38	N(alpha)-acetyltransferase 38: NatC auxiliary subunit	335819
260	LOC566052	UPF0556 protein C19orf10-like	566052
261	tmem186	transmembrane protein 186	799142
262	timm13	translocase of inner mitochondrial membrane 13 homolog (yeast)	436738
263	smim4	small integral membrane protein 4	100332503
264	vps8	vacuolar protein sorting 8 homolog (S. cerevisiae)	791134
265	hacd2	3-hydroxyacyl-CoA dehydratase 2	334121
266	esd	esterase D/formylglutathione hydrolase	550494
267	sec13	SEC13 homolog: nuclear pore and COPII coat complex component	798071
268	hspe1	heat shock 10 protein 1	58041
269	lrpprc	leucine-rich pentatricopeptide repeat containing	557195
270	coq4	coenzyme Q4 homolog (S. cerevisiae)	100137123
271	mccc1	methylcrotonoyl-CoA carboxylase 1 (alpha)	777632
272	lman1	lectin: mannose-binding: 1	559775
273	ifrd2	interferon-related developmental regulator 2	445227
274	nars	asparaginyl-tRNA synthetase	568332
275	stt3b	STT3B: subunit of the oligosaccharyltransferase complex (catalytic)	323918
276	tcf25	transcription factor 25 (basic helix-loop-helix)	445817
277	rnls	renalase: FAD-dependent amine oxidase	436880
278	mrpl51	mitochondrial ribosomal protein L51	797002
279	tubb2b	tubulin: beta 2b	641421
280	si:ch211-51h9.6	si:ch211-51h9.6	563100
281	mipep	mitochondrial intermediate peptidase	100005953
282	mrps18c	mitochondrial ribosomal protein S18C	569841
283	coq2	coenzyme Q2 4-hydroxybenzoate polyprenyltransferase	100037331
284	abhd16a	abhydrolase domain containing 16A	564613
285	gfm2	G elongation factor: mitochondrial 2	558184
286	mtif2	mitochondrial translational initiation factor 2	556465
287	rab3ip	RAB3A interacting protein (rabin3)	553605
288	ecsit	ECSIT signalling integrator	569243
289	mrpl47	mitochondrial ribosomal protein L47	557789
290	skiv2l	SKI2 homolog: superkiller viralicidic activity 2-like	559653
291	pam16	presequence translocase associated motor 16	393777
292	vipas39	VPS33B interacting protein: apical-basolateral polarity regulator: spe-39 homolog	415096
293	copz1	coatomer protein complex: subunit zeta 1	57970
294	mest	mesoderm specific transcript	30242
295	atp13a1	ATPase 13A1	334466
296	gmppb	GDP-mannose pyrophosphorylase B	445097
297	shmt1	serine hydroxymethyltransferase 1 (soluble)	394021
298	tmtc4	transmembrane and tetratricopeptide repeat containing 4	560605
299	idh3a	isocitrate dehydrogenase 3 (NAD+) alpha	393926
300	mesd	mesoderm development LRP chaperone	791222

## Sheet: a.6
Rank	Gene	Function	Gene ID
1	mRpL4	mitochondrial ribosomal protein L4	49425
2	PCID2	PCI domain-containing protein 2	39306
3	CG12173	CG12173 gene product from transcript CG12173-RA	40630
4	CG11980	CG11980 gene product from transcript CG11980-RC	41078
5	CG2091	CG2091 gene product from transcript CG2091-RA	40711
6	CG3434	CG3434 gene product from transcript CG3434-RA	39098
7	Aos1	Activator of SUMO 1	41532
8	mago	mago nashi	37402
9	Prx6005	Peroxiredoxin 6005	33493
10	mRpL11	mitochondrial ribosomal protein L11	41757
11	Sptr	Sepiapterin reductase	31781
12	CG5131	CG5131 gene product from transcript CG5131-RA	35057
13	CG10038	CG10038 gene product from transcript CG10038-RB	41495
14	MAGE	CG10059 gene product from transcript CG10059-RA	40860
15	CG7519	CG7519 gene product from transcript CG7519-RA	40377
16	SmD2	Small ribonucleoprotein particle protein SmD2	40781
17	CG1218	CG1218 gene product from transcript CG1218-RA	40718
18	CG7741	CG7741 gene product from transcript CG7741-RA	36208
19	CG7133	CG7133 gene product from transcript CG7133-RA	40449
20	alien	CG9556 gene product from transcript CG9556-RD	34225
21	CG7506	CG7506 gene product from transcript CG7506-RA	38857
22	cin	cinnamon	30973
23	Rpp30	RNaseP protein p30	44392
24	CG11555	CG11555 gene product from transcript CG11555-RB	33193
25	CG5515	CG5515 gene product from transcript CG5515-RC	42875
26	CG5323	CG5323 gene product from transcript CG5323-RA	37137
27	GstZ1	Glutathione S transferase Z1	41132
28	Zpr1	CG9060 gene product from transcript CG9060-RA	31851
29	CG14103	CG14103 gene product from transcript CG14103-RB	40158
30	eEF1delta	CG4912 gene product from transcript CG4912-RB	34363
31	CG12267	CG12267 gene product from transcript CG12267-RB	41542
32	Art1	Arginine methyltransferase 1	41295
33	Torsin	CG3024 gene product from transcript CG3024-RB	31399
34	mRpL10	mitochondrial ribosomal protein L10	33182
35	CG33051	CG33051 gene product from transcript CG33051-RA	39941
36	CG9154	CG9154 gene product from transcript CG9154-RB	33858
37	mTTF	mitochondrial transcription termination factor	34837
38	Prx3	Peroxiredoxin 3	42109
39	CG8891	CG8891 gene product from transcript CG8891-RA	33718
40	CG7275	CG7275 gene product from transcript CG7275-RA	39669
41	CG15881	CG15881 gene product from transcript CG15881-RB	40159
42	CG8326	CG8326 gene product from transcript CG8326-RA	32738
43	Mesh1	Metazoan SpoT homolog-1	43456
44	CG3527	CG3527 gene product from transcript CG3527-RA	31387
45	Rrp47	Ribosomal RNA processing 47	32558
46	CG4447	CG4447 gene product from transcript CG4447-RA	39067
47	Nmt	N-myristoyl transferase	38909
48	CG6182	CG6182 gene product from transcript CG6182-RA	42869
49	Pfdn2	Prefoldin 2	46121
50	RpS15Ab	Ribosomal protein S15Ab	36142
51	CG1896	CG1896 gene product from transcript CG1896-RA	43738
52	IntS9	Integrator 9	39763
53	CG5188	CG5188 gene product from transcript CG5188-RA	34428
54	CSN8	COP9 signalosome subunit 8	49077
55	CG10214	CG10214 gene product from transcript CG10214-RA	42811
56	CSN4	COP9 signalosome subunit 4	35759
57	AIMP2	aaRS-interacting multifunctional protein 2	39690
58	CG30100	CG30100 gene product from transcript CG30100-RA	246457
59	Nlp	Nucleoplasmin	43560
60	Rrp42	CG8395 gene product from transcript CG8395-RA	36766
61	mRpL44	mitochondrial ribosomal protein L44	40656
62	CG9643	CG9643 gene product from transcript CG9643-RB	33504
63	l(2)k14505	lethal (2) k14505	35399
64	Tim17b	Translocase of the inner mitochondrial membrane 17b	3355107
65	CG8149	CG8149 gene product from transcript CG8149-RA	41137
66	CG4332	CG4332 gene product from transcript CG4332-RA	32267
67	l(2)10685	lethal (2) 10685	33293
68	CG17168	CG17168 gene product from transcript CG17168-RA	3354996
69	Nsun5	Nop2/Sun-like domain containing protein 5	7354421
70	Trax	Translin associated factor X	41871
71	mRpL51	mitochondrial ribosomal protein L51	34186
72	mRpS11	mitochondrial ribosomal protein S11	42061
73	CG3909	CG3909 gene product from transcript CG3909-RA	41226
74	wcd	wicked	36831
75	CG2811	CG2811 gene product from transcript CG2811-RB	37988
76	CG11563	CG11563 gene product from transcript CG11563-RA	43735
77	CG6951	CG6951 gene product from transcript CG6951-RB	40222
78	Dbp21E2	DEAD box protein 21E2	33254
79	CG14100	CG14100 gene product from transcript CG14100-RA	40132
80	FRG1	FSHD region gene 1	40228
81	CG11307	CG11307 gene product from transcript CG11307-RC	40400
82	Pgam5	Phosphoglycerate mutase 5	31143
83	Gmer	GDP-4-keto-6-deoxy-D-mannose 3:5-epimerase/4-reductase	37638
84	Set	CG4299 gene product from transcript CG4299-RA	41844
85	CG6523	CG6523 gene product from transcript CG6523-RA	34745
86	CG34163	CG34163 gene product from transcript CG34163-RA	5740407
87	CG14286	CG14286 gene product from transcript CG14286-RA	42280
88	IleRS	Isoleucyl-tRNA synthetase	45785
89	CG13392	CG13392 gene product from transcript CG13392-RB	34157
90	Chrac-14	Chromatin accessibility complex 14kD protein	3772329
91	mRpL30	mitochondrial ribosomal protein L30	31398
92	CG2100	CG2100 gene product from transcript CG2100-RB	40707
93	REG	CG1591 gene product from transcript CG1591-RB	32274
94	CG8005	CG8005 gene product from transcript CG8005-RA	38917
95	CG16734	CG16734 gene product from transcript CG16734-RD	41100
96	Mtr3	CG8025 gene product from transcript CG8025-RA	40173
97	RpS3A	Ribosomal protein S3A	43768
98	mRpL39	mitochondrial ribosomal protein L39	39627
99	AlkB	CG33250 gene product from transcript CG33250-RB	2768870
100	CG8132	CG8132 gene product from transcript CG8132-RA	41121
101	CG14104	CG14104 gene product from transcript CG14104-RB	50259
102	metl	methyltransferase-like	38197
103	ECSIT	CG10610 gene product from transcript CG10610-RA	40732
104	CG10602	CG10602 gene product from transcript CG10602-RF	35146
105	CG11790	CG11790 gene product from transcript CG11790-RB	42999
106	CG33332	CG33332 gene product from transcript CG33332-RA	2768669
107	SmE	Small ribonucleoprotein particle protein SmE	34080
108	CG13163	CG13163 gene product from transcript CG13163-RB	36335
109	CG1142	CG1142 gene product from transcript CG1142-RA	40894
110	NAA20	N(alpha)-acetyltransferase 20	32962
111	CG5969	CG5969 gene product from transcript CG5969-RA	40269
112	CG11920	CG11920 gene product from transcript CG11920-RA	43009
113	CG11858	CG11858 gene product from transcript CG11858-RA	43044
114	CG3436	CG3436 gene product from transcript CG3436-RC	33180
115	Prpk	p53-related protein kinase	38600
116	Rrp46	CG4043 gene product from transcript CG4043-RA	41270
117	mRpL1	mitochondrial ribosomal protein L1	40980
118	CG2875	CG2875 gene product from transcript CG2875-RC	31326
119	PpD3	Protein phosphatase D3	49779
120	CG5220	CG5220 gene product from transcript CG5220-RA	42056
121	ArgRS	Arginyl-tRNA synthetase	32539
122	CG4045	CG4045 gene product from transcript CG4045-RA	31176
123	CG9286	CG9286 gene product from transcript CG9286-RA	41690
124	l(2)k09848	lethal (2) k09848	35536
125	Cdk7	Cyclin-dependent kinase 7	31441
126	CG12129	CG12129 gene product from transcript CG12129-RA	36044
127	Nph	Nucleophosmin	43559
128	GAPsec	GTPase activating protein: SECIS-dependent read-through	38987
129	SF2	Splicing factor 2	53443
130	csul	capsuleen	36809
131	CG32075	CG32075 gene product from transcript CG32075-RA	326192
132	mRpL13	mitochondrial ribosomal protein L13	35145
133	Dim1	CG3058 gene product from transcript CG3058-RA	33645
134	PDCD-5	Programmed Cell Death 5	39776
135	CG5757	CG5757 gene product from transcript CG5757-RB	37062
136	CG9386	CG9386 gene product from transcript CG9386-RA	41148
137	thoc7	CG17143 gene product from transcript CG17143-RB	38033
138	CG11444	CG11444 gene product from transcript CG11444-RB	31388
139	CG4866	CG4866 gene product from transcript CG4866-RA	36976
140	DENR	Density regulated protein	32679
141	Paf-AHalpha	Platelet-activating factor acetylhydrolase alpha	32529
142	CG31301	CG31301 gene product from transcript CG31301-RA	41865
143	mRpL17	mitochondrial ribosomal protein L17	38046
144	mRpL35	mitochondrial ribosomal protein L35	42588
145	Usp39	Ubiquitin specific protease 39	32881
146	CG10194	CG10194 gene product from transcript CG10194-RA	35231
147	mRpL20	mitochondrial ribosomal protein L20	39477
148	RfC38	Replication factor C 38kD subunit	34550
149	GstO2	Glutathione S transferase O2	38974
150	CG31111	CG31111 gene product from transcript CG31111-RA	318595
151	Aprt	Adenine phosphoribosyltransferase	48224
152	Ogg1	8-oxoguanine DNA glycosylase	31806
153	CG31223	CG31223 gene product from transcript CG31223-RA	326127
154	CG8778	CG8778 gene product from transcript CG8778-RA	36392
155	FK506-bp2	FK506-binding protein 2	37214
156	CG31278	CG31278 gene product from transcript CG31278-RA	41282
157	mRpL15	mitochondrial ribosomal protein L15	40261
158	mRpS10	mitochondrial ribosomal protein S10	41838
159	Rcd4	Reduction in Cnn dots 4	34158
160	CG4069	CG4069 gene product from transcript CG4069-RA	39437
161	mRpS30	mitochondrial ribosomal protein S30	32530
162	janA	janus A	43569
163	Uba4	Uba4 ortholog	34187
164	TFAM	mitochondrial transcription factor A	42433
165	l(2)09851	lethal (2) 09851	46662
166	mRpL50	mitochondrial ribosomal protein L50	38796
167	mRpL32	mitochondrial ribosomal protein L32	43698
168	GluRS-m	Glutamyl-tRNA synthetase: mitochondrial	39828
169	Rpb5	CG11979 gene product from transcript CG11979-RB	36160
170	CG11583	CG11583 gene product from transcript CG11583-RA	326206
171	CycC	Cyclin C	41801
172	CG30010	CG30010 gene product from transcript CG30010-RB	246389
173	CG8460	CG8460 gene product from transcript CG8460-RA	34115
174	Bdbt	Bride of doubletime	42503
175	CG1665	CG1665 gene product from transcript CG1665-RA	36014
176	CG18643	CG18643 gene product from transcript CG18643-RC	41371
177	san	separation anxiety	44724
178	Cdc2rk	Cdc2-related kinase	36051
179	CG17219	CG17219 gene product from transcript CG17219-RA	33515
180	Prosbeta4	Proteasome beta4 subunit	34999
181	CG3594	CG3594 gene product from transcript CG3594-RA	37964
182	CG15014	CG15014 gene product from transcript CG15014-RA	38533
183	CG14550	CG14550 gene product from transcript CG14550-RA	43168
184	Rae1	CG9862 gene product from transcript CG9862-RA	37467
185	ProRS-m	Prolyl-tRNA synthetase: mitochondrial	38331
186	CG3262	CG3262 gene product from transcript CG3262-RE	35452
187	CG11777	CG11777 gene product from transcript CG11777-RA	36108
188	eIF2B-alpha	CG7883 gene product from transcript CG7883-RA	43549
189	CG14881	CG14881 gene product from transcript CG14881-RB	41990
190	CG8607	CG8607 gene product from transcript CG8607-RA	38805
191	CG4042	CG4042 gene product from transcript CG4042-RB	40291
192	Rcp	Receptor component protein	32678
193	CG3358	CG3358 gene product from transcript CG3358-RF	35604
194	CG32099	CG32099 gene product from transcript CG32099-RA	317852
195	Bka	Bekka	46032
196	Ak6	Adenylate kinase 6	36379
197	RpII33	RNA polymerase II 33kD subunit	34796
198	CG4908	CG4908 gene product from transcript CG4908-RB	34360
199	CG3776	CG3776 gene product from transcript CG3776-RB	37996
200	AsnRS-m	Asparaginyl-tRNA synthetase: mitochondrial	36909
201	ApepP	Aminopeptidase P	35029
202	Ran	CG1404 gene product from transcript CG1404-RC	44072
203	CG7137	CG7137 gene product from transcript CG7137-RA	37204
204	LSm3	Like Sm 3	42842
205	CG7638	CG7638 gene product from transcript CG7638-RA	39250
206	Urm1	Ubiquitin-related modifier 1 ortholog	2768949
207	Arv1	ACAT-related protein required for viability 1	318031
208	CG9267	CG9267 gene product from transcript CG9267-RA	34762
209	GstE13	Glutathione S transferase E13	35928
210	CSN5	COP9 signalosome subunit 5	42000
211	CG17683	CG17683 gene product from transcript CG17683-RD	3355011
212	Tcs3	CG4933 gene product from transcript CG4933-RA	39811
213	Tom40	Translocase of outer membrane 40	44978
214	CG8461	CG8461 gene product from transcript CG8461-RA	41758
215	CG17652	CG17652 gene product from transcript CG17652-RB	33353
216	CG9948	CG9948 gene product from transcript CG9948-RB	38757
217	mRpL33	mitochondrial ribosomal protein L33	50381
218	Ppt1	Palmitoyl-protein thioesterase 1	31805
219	Haspin	CG40080 gene product from transcript CG40080-RA	3355064
220	CG3420	CG3420 gene product from transcript CG3420-RA	35585
221	CG6610	CG6610 gene product from transcript CG6610-RA	38693
222	CG8207	CG8207 gene product from transcript CG8207-RA	36730
223	Art3	Arginine methyltransferase 3	41837
224	CG6550	CG6550 gene product from transcript CG6550-RA	36954
225	Lst8	CG3004 gene product from transcript CG3004-RA	31903
226	Cyp1	Cyclophilin 1	32595
227	Uev1A	Ubiquitin-conjugating enzyme variant 1A	38613
228	SmF	Small ribonucleoprotein particle protein SmF	36314
229	CG4594	CG4594 gene product from transcript CG4594-RB	34316
230	pic	piccolo	41611
231	CG10470	CG10470 gene product from transcript CG10470-RA	35174
232	bonsai	CG4207 gene product from transcript CG4207-RA	37587
233	CG11837	CG11837 gene product from transcript CG11837-RA	43429
234	mRpL55	mitochondrial ribosomal protein L55	42290
235	nac	neuronally altered carbohydrate	40981
236	Dph5	Diphthamide methyltransferase	42663
237	CG10465	CG10465 gene product from transcript CG10465-RA	35488
238	CG7200	CG7200 gene product from transcript CG7200-RB	35089
239	CG32281	CG32281 gene product from transcript CG32281-RA	317953
240	CG9471	CG9471 gene product from transcript CG9471-RA	41197
241	CG9601	CG9601 gene product from transcript CG9601-RA	40994
242	CG15027	CG15027 gene product from transcript CG15027-RA	32440
243	PIG-U	Phosphatidylinositol glycan anchor biosynthesis: class U	34185
244	SerRS-m	Seryl-tRNA synthetase: mitochondrial	41862
245	CG5126	CG5126 gene product from transcript CG5126-RA	33306
246	Bub3	CG7581 gene product from transcript CG7581-RB	43490
247	mRpL45	mitochondrial ribosomal protein L45	42671
248	mod	modulo	43764
249	CG1227	CG1227 gene product from transcript CG1227-RA	40872
250	Gas41	CG9207 gene product from transcript CG9207-RA	33973
251	alpha-PheRS	Phenylalanyl-tRNA synthetase: alpha-subunit	31740
252	pont	pontin	53439
253	mRpL19	mitochondrial ribosomal protein L19	41028
254	Tim9a	CG1660 gene product from transcript CG1660-RA	32294
255	FKBP59	FK506-binding protein FKBP59	47762
256	Cdc16	Cell division cycle 16	42753
257	CG7054	CG7054 gene product from transcript CG7054-RA	42643
258	Bap55	Brahma associated protein 55kD	36956
259	holn1	hole-in-one	34432
260	mRpS6	mitochondrial ribosomal protein S6	38535
261	NHP2	CG5258 gene product from transcript CG5258-RB	44005
262	MRG15	MORF-related gene 15	41850
263	CG10424	CG10424 gene product from transcript CG10424-RA	40085
264	Hel25E	Helicase at 25E	33781
265	Prosbeta2	Proteasome beta2 subunit	39628
266	Pfdn1	Prefoldin 1	33857
267	mRpS18B	mitochondrial ribosomal protein S18B	35299
268	CG14434	CG14434 gene product from transcript CG14434-RC	31632
269	CG4972	CG4972 gene product from transcript CG4972-RA	34388
270	Sdhaf3	Succinate dehydrogenase assembly factor 3	42004
271	CkIIalpha	casein kinase IIalpha	48448
272	CG12863	CG12863 gene product from transcript CG12863-RA	36623
273	RpS27A	Ribosomal protein S27A	34420
274	Dhfr	Dihydrofolate reductase	42003
275	CG31673	CG31673 gene product from transcript CG31673-RB	35348
276	mRpL18	mitochondrial ribosomal protein L18	36406
277	l(2)37Cg	lethal (2) 37Cg	35196
278	r-l	rudimentary-like	42493
279	Rpb8	CG11246 gene product from transcript CG11246-RA	40415
280	Parp	Poly-(ADP-ribose) polymerase	3355109
281	CG13220	CG13220 gene product from transcript CG13220-RB	36200
282	FK506-bp1	FK506-binding protein 1	41860
283	vito	viriato	326214
284	Mt2	Methyltransferase 2	34632
285	CG11851	CG11851 gene product from transcript CG11851-RA	43031
286	CG6712	CG6712 gene product from transcript CG6712-RA	34631
287	TfIIS	RNA polymerase II elongation factor	34883
288	Rpt4	Regulatory particle triple-A ATPase 4	31567
289	CG14805	CG14805 gene product from transcript CG14805-RA	31146
290	mRpS7	mitochondrial ribosomal protein S7	34412
291	tsr	twinstar	37841
292	Cbs	Cystathionine beta-synthase	33081
293	PQBP1	Poly-glutamine tract binding protein 1	43004
294	Srp9	Signal recognition particle protein 9	38883
295	Rpb7	CG31155 gene product from transcript CG31155-RA	261631
296	CG9853	CG9853 gene product from transcript CG9853-RC	40557
297	Prosalpha6	Proteasome alpha6 subunit	34359
298	SNRPG	Small nuclear ribonucleoprotein G	32636
299	CG42445	CG42445 gene product from transcript CG42445-RA	8674111
300	CG12107	CG12107 gene product from transcript CG12107-RA	35712

## Sheet: a.7
Rank	Gene	Function	Gene ID
1	PDE1C	phosphodiesterase 1C	693937
2	TRAPPC11	trafficking protein particle complex 11	702066
3	C4H6orf203	chromosome 4 open reading frame: human C6orf203	698108
4	ZDHHC16	zinc finger DHHC-type containing 16	705982
5	RBBP9	RB binding protein 9: serine hydrolase	698192
6	VEZT	vezatin: adherens junctions transmembrane protein	716675
7	PYROXD1	pyridine nucleotide-disulphide oxidoreductase domain 1	705781
8	GRP	gastrin releasing peptide	696983
9	MTO1	mitochondrial tRNA translation optimization 1	717688
10	C7H14orf119	chromosome 7 open reading frame: human C14orf119	100426877
11	ZNF233	zinc finger protein 233	713398
12	LOC714758	putative zinc finger protein 724	714758
13	SENP3	SUMO1/sentrin/SMT3 specific peptidase 3	715884
14	ZBED8	zinc finger BED-type containing 8	695905
15	C11H12orf4	chromosome 11 open reading frame: human C12orf4	710836
16	ARMC1	armadillo repeat containing 1	702079
17	INPP5B	inositol polyphosphate-5-phosphatase B	716851
18	TIMMDC1	translocase of inner mitochondrial membrane domain containing 1	712414
19	CRYZL1	crystallin zeta like 1	698723
20	TMEM33	transmembrane protein 33	702063
21	TUBD1	tubulin delta 1	711819
22	FBXO8	F-box protein 8	699302
23	MFSD4A	major facilitator superfamily domain containing 4A	697813
24	ADGRL2	adhesion G protein-coupled receptor L2	708998
25	TRIM68	tripartite motif containing 68	717644
26	PREB	prolactin regulatory element binding	700408
27	CPOX	coproporphyrinogen oxidase	698849
28	DPH5	diphthamide biosynthesis 5	712253
29	KRIT1	KRIT1: ankyrin repeat containing	702623
30	GEM1	GEM 1 protein	574107
31	SRR	serine racemase	703426
32	BOLA1	bolA family member 1	705297
33	UNC50	unc-50 inner nuclear membrane RNA binding protein	677700
34	CYB5B	cytochrome b5 type B (outer mitochondrial membrane)	705093
35	CHSY3	chondroitin sulfate synthase 3	705715
36	PNPO	pyridoxamine 5'-phosphate oxidase	694949
37	ANAPC7	anaphase promoting complex subunit 7	709012
38	MAT2B	methionine adenosyltransferase 2B	698119
39	BET1	Bet1 golgi vesicular membrane trafficking protein	700492
40	C13H2orf15	chromosome 13 open reading frame: human C2orf15	100423488
41	ZNF512	zinc finger protein 512	702324
42	CARNMT1	carnosine N-methyltransferase 1	706229
43	FASTKD3	FAST kinase domains 3	695780
44	NOSTRIN	nitric oxide synthase trafficking	705063
45	GFM1	G elongation factor mitochondrial 1	706456
46	CMTM8	CKLF like MARVEL transmembrane domain containing 8	704234
47	ANO4	anoctamin 4	695973
48	ELP3	elongator acetyltransferase complex subunit 3	713512
49	GEMIN6	gem nuclear organelle associated protein 6	711246
50	LOC701034	zinc finger protein 780B	701034
51	COG1	component of oligomeric golgi complex 1	695754
52	LIN9	lin-9 DREAM MuvB core complex component	699056
53	FLRT1	fibronectin leucine rich transmembrane protein 1	717942
54	MPI	mannose phosphate isomerase	722129
55	ZNF322	zinc finger protein 322	701098
56	DYNC1I2	dynein cytoplasmic 1 intermediate chain 2	695696
57	PON2	paraoxonase 2	699107
58	SCRN3	secernin 3	698199
59	EXO5	exonuclease 5	694536
60	IMPACT	impact RWD domain protein	707508
61	SFXN4	sideroflexin 4	702765
62	MKRN2	makorin ring finger protein 2	697649
63	ASH2L	ASH2 like histone lysine methyltransferase complex subunit	699382
64	ZNF277	zinc finger protein 277	702496
65	METTL2A	methyltransferase like 2A	717533
66	C13H2orf42	chromosome 13 open reading frame: human C2orf42	709888
67	MBTPS2	membrane bound transcription factor peptidase: site 2	696540
68	MMACHC	methylmalonic aciduria (cobalamin deficiency) cblC type: with homocystinuria	706247
69	LMO3	LIM domain only 3	701893
70	LRRK2	leucine rich repeat kinase 2	697930
71	LARP1B	La ribonucleoprotein domain family member 1B	693747
72	VPS50	VPS50: EARP/GARPII complex subunit	701991
73	TSEN15	tRNA splicing endonuclease subunit 15	717481
74	LOC722710	zinc finger protein 845-like	722710
75	RAB9B	RAB9B: member RAS oncogene family	698014
76	MTHFD1	methylenetetrahydrofolate dehydrogenase: cyclohydrolase and formyltetrahydrofolate synthetase 1	707059
77	ASF1A	anti-silencing function 1A histone chaperone	714761
78	WDR11	WD repeat domain 11	714990
79	AP5M1	adaptor related protein complex 5 mu 1 subunit	701050
80	THRB	thyroid hormone receptor: beta	699969
81	ZNF627	zinc finger protein 627	716820
82	PDHB	pyruvate dehydrogenase E1 beta subunit	574227
83	JKAMP	JNK1/MAPK8 associated membrane protein	702307
84	2021-09-11	septin 11	698867
85	SEPHS1	selenophosphate synthetase 1	696038
86	STT3A	STT3A: catalytic subunit of the oligosaccharyltransferase complex	717056
87	LOC718775	uncharacterized LOC718775	718775
88	POLR2B	RNA polymerase II subunit B	694664
89	CASP8AP2	caspase 8 associated protein 2	702294
90	TRIM23	tripartite motif containing 23	696386
91	EFEMP1	EGF containing fibulin extracellular matrix protein 1	718984
92	EGLN2	egl-9 family hypoxia inducible factor 2	703083
93	C20H16orf70	chromosome 20 open reading frame: human C16orf70	695885
94	PLCL2	phospholipase C like 2	695590
95	LNP1	leukemia NUP98 fusion partner 1	700480
96	NNT	nicotinamide nucleotide transhydrogenase	701110
97	HMGCL	3-hydroxymethyl-3-methylglutaryl-CoA lyase	710833
98	NUP133	nucleoporin 133	693888
99	TTC4	tetratricopeptide repeat domain 4	715451
100	MTIF3	mitochondrial translational initiation factor 3	710571
101	ZNF75A	zinc finger protein 75a	702284
102	ZNF232	zinc finger protein 232	721621
103	TLL1	tolloid like 1	705831
104	TMEM192	transmembrane protein 192	708459
105	IPCEF1	interaction protein for cytohesin exchange factors 1	702741
106	LOC711453	serine/threonine-protein kinase SIK2	711453
107	AP3M1	adaptor related protein complex 3 mu 1 subunit	705729
108	NMT1	N-myristoyltransferase 1	715885
109	NUP50	nucleoporin 50	713282
110	AP3S2	adaptor related protein complex 3 sigma 2 subunit	701217
111	GLMN	glomulin: FKBP associated protein	706249
112	C14H11orf54	chromosome 14 open reading frame: human C11orf54	696483
113	ERI2	ERI1 exoribonuclease family member 2	696072
114	PIGW	phosphatidylinositol glycan anchor biosynthesis class W	717088
115	NDUFS1	NADH:ubiquinone oxidoreductase core subunit S1	706912
116	LOC694623	transient receptor potential cation channel subfamily A member 1	694623
117	ZNF146	zinc finger protein 146	712704
118	HINFP	histone H4 transcription factor	703763
119	FAM81B	family with sequence similarity 81 member B	702232
120	RNF34	ring finger protein 34	700062
121	GEMIN5	gem nuclear organelle associated protein 5	714864
122	VAT1L	vesicle amine transport 1 like	715535
123	PHKB	phosphorylase kinase regulatory subunit beta	716390
124	AMER1	APC membrane recruitment protein 1	707700
125	PPP4R3B	protein phosphatase 4 regulatory subunit 3B	718961
126	FAM217B	family with sequence similarity 217 member B	720556
127	PIGM	phosphatidylinositol glycan anchor biosynthesis class M	719582
128	WASHC5	WASH complex subunit 5	706857
129	TMEM209	transmembrane protein 209	706578
130	FAM13C	family with sequence similarity 13 member C	702439
131	FBXL5	F-box and leucine rich repeat protein 5	722846
132	METTL4	methyltransferase like 4	696353
133	RCSD1	RCSD domain containing 1	701239
134	EIF4ENIF1	eukaryotic translation initiation factor 4E nuclear import factor 1	716871
135	NCKIPSD	NCK interacting protein with SH3 domain	709410
136	ZMYM6	zinc finger MYM-type containing 6	711401
137	ADAMTS8	ADAM metallopeptidase with thrombospondin type 1 motif 8	718962
138	TRHDE	thyrotropin releasing hormone degrading enzyme	717653
139	BCL7A	BCL tumor suppressor 7A	705028
140	PKNOX2	PBX/knotted 1 homeobox 2	713041
141	MYEF2	myelin expression factor 2	716153
142	FZD4	frizzled class receptor 4	704754
143	ACTL6A	actin like 6A	708935
144	BTC	betacellulin	702178
145	LOC106993385	uncharacterized LOC106993385	106993385
146	MRPL35	mitochondrial ribosomal protein L35	717628
147	AHCYL1	adenosylhomocysteinase like 1	700681
148	ZNF112	zinc finger protein 112	713527
149	FSTL5	follistatin like 5	677713
150	TMEM223	transmembrane protein 223	722231
151	MYRIP	myosin VIIA and Rab interacting protein	717173
152	FAM120B	family with sequence similarity 120B	696010
153	IQSEC1	IQ motif and Sec7 domain 1	693922
154	GANC	glucosidase alpha: neutral C	708126
155	HRH1	histamine receptor H1	696359
156	ORC2	origin recognition complex subunit 2	700691
157	PBLD	phenazine biosynthesis like protein domain containing	694885
158	PPP2R1B	protein phosphatase 2 scaffold subunit Abeta	710387
159	SLC35B3	solute carrier family 35 member B3	698416
160	STAU2	staufen double-stranded RNA binding protein 2	696034
161	NEUROD6	neuronal differentiation 6	694337
162	DGKB	diacylglycerol kinase beta	715254
163	ZNF740	zinc finger protein 740	701428
164	AIFM1	apoptosis inducing factor mitochondria associated 1	702773
165	BRD8	bromodomain containing 8	716492
166	CCPG1	cell cycle progression 1	698918
167	DDX46	DEAD-box helicase 46	711026
168	GCLM	glutamate-cysteine ligase modifier subunit	713888
169	ARL14EP	ADP ribosylation factor like GTPase 14 effector protein	697201
170	HSDL1	hydroxysteroid dehydrogenase like 1	714962
171	EIF2AK1	eukaryotic translation initiation factor 2 alpha kinase 1	703325
172	OPA1	OPA1: mitochondrial dynamin like GTPase	698540
173	RPP14	ribonuclease P/MRP subunit p14	706788
174	NUDCD1	NudC domain containing 1	698632
175	EOGT	EGF domain specific O-linked N-acetylglucosamine transferase	696742
176	TTLL12	tubulin tyrosine ligase like 12	714871
177	BRCC3	BRCA1/BRCA2-containing complex subunit 3	702888
178	TCIM	transcriptional and immune response regulator	702517
179	DCHS1	dachsous cadherin-related 1	711938
180	VASH2	vasohibin 2	709924
181	PARS2	prolyl-tRNA synthetase 2: mitochondrial	715499
182	MRS2	MRS2: magnesium transporter	707676
183	MICU1	mitochondrial calcium uptake 1	708654
184	PTCHD1	patched domain containing 1	699554
185	MAP2K4	mitogen-activated protein kinase kinase 4	718155
186	NEU1	neuraminidase 1	716740
187	UTP14A	UTP14A: small subunit processome component	703510
188	VPS36	vacuolar protein sorting 36 homolog	693290
189	PECAM1	platelet and endothelial cell adhesion molecule 1	718302
190	CRYM	crystallin mu	697588
191	GLIPR1	GLI pathogenesis related 1	718956
192	MSH2	mutS homolog 2	718017
193	RNF5	ring finger protein 5	717234
194	LOC722722	zinc finger protein 160-like	722722
195	ARRB1	arrestin beta 1	695250
196	MEF2C	myocyte enhancer factor 2C	694992
197	NEXMIF	neurite extension and migration factor	703920
198	IMMT	inner membrane mitochondrial protein	697156
199	LOC701519	threonine--tRNA ligase: cytoplasmic	701519
200	ATPAF1	ATP synthase mitochondrial F1 complex assembly factor 1	708798
201	PRUNE2	prune homolog 2	707402
202	DCAF16	DDB1 and CUL4 associated factor 16	722865
203	LOC706930	ubiquitin carboxyl-terminal hydrolase 4	706930
204	SLC35A1	solute carrier family 35 member A1	699113
205	ITPR1	inositol 1:4:5-trisphosphate receptor type 1	703669
206	CEPT1	choline/ethanolamine phosphotransferase 1	702700
207	DNAJC16	DnaJ heat shock protein family (Hsp40) member C16	700894
208	CAMK2G	calcium/calmodulin dependent protein kinase II gamma	705980
209	ZNF260	zinc finger protein 260	106994751
210	PLAC9	placenta specific 9	700881
211	RWDD4	RWD domain containing 4	708882
212	RNF14	ring finger protein 14	705363
213	MON2	MON2 homolog: regulator of endosome-to-Golgi trafficking	716872
214	WRN	Werner syndrome RecQ like helicase	695678
215	SIRT4	sirtuin 4	720498
216	GATC	glutamyl-tRNA amidotransferase subunit C	702258
217	CDC16	cell division cycle 16	699089
218	LOC712487	protein NipSnap homolog 3B	712487
219	TYRP1	tyrosinase related protein 1	714646
220	EIF2B2	eukaryotic translation initiation factor 2B subunit beta	701360
221	DARS2	aspartyl-tRNA synthetase 2: mitochondrial	707002
222	RXFP1	relaxin/insulin like family peptide receptor 1	701107
223	COMMD8	COMM domain containing 8	704346
224	PALB2	partner and localizer of BRCA2	700843
225	IFNAR1	interferon alpha and beta receptor subunit 1	699604
226	DPY19L1	dpy-19 like C-mannosyltransferase 1	707780
227	TSR1	TSR1: ribosome maturation factor	703311
228	MCAM	melanoma cell adhesion molecule	708449
229	JPT1	Jupiter microtubule associated homolog 1	664729
230	DKK1	dickkopf WNT signaling pathway inhibitor 1	702997
231	EMG1	EMG1: N1-specific pseudouridine methyltransferase	722122
232	PCYOX1L	prenylcysteine oxidase 1 like	710587
233	ZSCAN21	zinc finger and SCAN domain containing 21	710501
234	TBC1D8B	TBC1 domain family member 8B	701409
235	MIOS	meiosis regulator for oocyte development	696371
236	HDHD2	haloacid dehalogenase like hydrolase domain containing 2	697216
237	PTGFRN	prostaglandin F2 receptor inhibitor	713889
238	KLHL13	kelch like family member 13	710546
239	SNAPC3	small nuclear RNA activating complex polypeptide 3	106992274
240	RMDN1	regulator of microtubule dynamics 1	694237
241	LARS	leucyl-tRNA synthetase	706792
242	ZNF140	zinc finger protein 140	695171
243	LOC714265	zinc finger protein 141	714265
244	LOC693611	zinc finger protein 493-like	693611
245	ZMYM3	zinc finger MYM-type containing 3	697147
246	MLH1	mutL homolog 1	698782
247	SNRNP27	small nuclear ribonucleoprotein U4/U6.U5 subunit 27	708670
248	FTO	FTO: alpha-ketoglutarate dependent dioxygenase	703724
249	PEX3	peroxisomal biogenesis factor 3	700730
250	ZNF471	zinc finger protein 471	706874
251	RUNX1T1	RUNX1 translocation partner 1	696934
252	RPE	ribulose-5-phosphate-3-epimerase	711322
253	PKIA	cAMP-dependent protein kinase inhibitor alpha	698509
254	ZNF30	zinc finger protein 30	718310
255	DENND4B	DENN domain containing 4B	718490
256	ZNF583	zinc finger protein 583	705205
257	ZNF334	zinc finger protein 334	706702
258	AZI2	5-azacytidine induced 2	705275
259	SERPINF1	serpin family F member 1	721262
260	CRBN	cereblon	704436
261	CSRP2BP	CSRP2 binding protein	697187
262	YIPF4	Yip1 domain family member 4	706819
263	SERPINI1	serpin family I member 1	699483
264	ANKRD46	ankyrin repeat domain 46	705491
265	METTL15	methyltransferase like 15	698208
266	GLO1	glyoxalase I	719518
267	TNFAIP8L2	TNF alpha induced protein 8 like 2	709632
268	DYNC1LI1	dynein cytoplasmic 1 light intermediate chain 1	704654
269	SLC4A1AP	solute carrier family 4 member 1 adaptor protein	701783
270	FAM241B	family with sequence similarity 241 member B	711517
271	VPS4B	vacuolar protein sorting 4 homolog B	707614
272	ZNF385B	zinc finger protein 385B	704204
273	EMCN	endomucin	709580
274	CALHM2	calcium homeostasis modulator family member 2	714662
275	FAXDC2	fatty acid hydroxylase domain containing 2	714763
276	SRBD1	S1 RNA binding domain 1	714485
277	ANKRD40	ankyrin repeat domain 40	706451
278	ATIC	5-aminoimidazole-4-carboxamide ribonucleotide formyltransferase/IMP cyclohydrolase	694819
279	ZBED9	zinc finger BED-type containing 9	708122
280	BPNT1	3'(2'): 5'-bisphosphate nucleotidase 1	721277
281	COQ2	coenzyme Q2: polyprenyltransferase	707681
282	SCFD1	sec1 family domain containing 1	716756
283	LOC723047	transcription initiation factor TFIID subunit 4-like	723047
284	CPSF6	cleavage and polyadenylation specific factor 6	718331
285	TFAM	transcription factor A: mitochondrial	701368
286	LOC698034	fructose-bisphosphate aldolase A-like	698034
287	LOC713689	zinc finger protein 585B	713689
288	FUBP3	far upstream element binding protein 3	722470
289	ZNF235	zinc finger protein 235	713459
290	SCARB2	scavenger receptor class B member 2	699990
291	COBL	cordon-bleu WH2 repeat protein	693867
292	CS	citrate synthase	709604
293	TMEM68	transmembrane protein 68	695447
294	CHCHD1	coiled-coil-helix-coiled-coil-helix domain containing 1	706322
295	LOC699759	zinc finger protein 33B	699759
296	FMR1	fragile X mental retardation 1	700138
297	EEF1AKMT1	EEF1A lysine methyltransferase 1	703665
298	ATP6V0A2	ATPase H+ transporting V0 subunit a2	710162
299	LHX6	LIM homeobox 6	698587
300	VPS25	vacuolar protein sorting 25 homolog	106994051

## Sheet: a.8
Rank	Gene	Function	Gene ID
1	ORC2	origin recognition complex subunit 2	478868
2	FASTKD2	FAST kinase domains 2	478884
3	GFM2	G elongation factor mitochondrial 2	478101
4	NDUFS1	NADH:ubiquinone oxidoreductase core subunit S1	478880
5	SF3B1	splicing factor 3b subunit 1	488456
6	KCTD18	potassium channel tetramerization domain containing 18	488464
7	MBD1	methyl-CpG binding domain protein 1	480218
8	ERICH1	glutamate rich 1	488554
9	OGT	O-linked N-acetylglucosamine (GlcNAc) transferase	480955
10	CARF	calcium responsive transcription factor	478877
11	WDR12	WD repeat domain 12	478876
12	SRSF6	serine and arginine rich splicing factor 6	403667
13	CELF1	CUGBP Elav-like family member 1	475979
14	UFSP2	UFM1 specific peptidase 2	482908
15	PPIL3	peptidylprolyl isomerase like 3	607430
16	TYW5	tRNA-yW synthesizing protein 5	478861
17	CDK7	cyclin dependent kinase 7	608441
18	BZW1	basic leucine zipper and W2 domains 1	478865
19	TMEM237	transmembrane protein 237	100856096
20	ALS2	ALS2: alsin Rho guanine nucleotide exchange factor	100856109
21	TUBGCP5	tubulin gamma complex associated protein 5	478999
22	KLF7	Kruppel like factor 7	478885
23	SRSF5	serine and arginine rich splicing factor 5	490754
24	ASTE1	asteroid homolog 1	610708
25	ABHD16A	abhydrolase domain containing 16A	474845
26	NBEAL1	neurobeachin like 1	488482
27	ANKHD1	ankyrin repeat and KH domain containing 1	612748
28	EPC1	enhancer of polycomb homolog 1	477970
29	SPATA5	spermatogenesis associated 5	483840
30	MAPK8	mitogen-activated protein kinase 8	477746
31	CASP8	caspase 8	488473
32	NKTR	natural killer cell triggering receptor	609597
33	VPS13C	vacuolar protein sorting 13 homolog C	487586
34	PHKB	phosphorylase kinase regulatory subunit beta	478139
35	XRCC5	X-ray repair cross complementing 5	478902
36	PAFAH2	platelet activating factor acetylhydrolase 2	478174
37	PRKAG1	protein kinase AMP-activated non-catalytic subunit gamma 1	486559
38	ANKZF1	ankyrin repeat and zinc finger domain containing 1	478916
39	TTI2	TELO2 interacting protein 2	608405
40	LOC487429	protein DDI1 homolog 2	487429
41	SMARCAL1	SWI/SNF related: matrix associated: actin dependent regulator of chromatin: subfamily a like 1	478903
42	LGALS8	galectin 8	479193
43	MTPN	myotrophin	403487
44	CCDC15	coiled-coil domain containing 15	489304
45	WASHC2C	WASH complex subunit 2C	477751
46	CNOT7	CCR4-NOT transcription complex subunit 7	482895
47	OSGEPL1	O-sialoglycoprotein endopeptidase like 1	478839
48	CLK1	CDC like kinase 1	478866
49	PRPF4B	pre-mRNA processing factor 4B	488199
50	ASCC1	activating signal cointegrator 1 complex subunit 1	608331
51	VPS41	VPS41: HOPS complex subunit	475876
52	ASNSD1	asparagine synthetase domain containing 1	478838
53	PLEKHM3	pleckstrin homology domain containing M3	478888
54	PNPLA8	patatin like phospholipase domain containing 8	475880
55	TRAPPC13	trafficking protein particle complex 13	478079
56	GPCPD1	glycerophosphocholine phosphodiesterase 1	485778
57	GLB1L	galactosidase beta 1 like	478917
58	N6AMT1	N-6 adenine-specific DNA methyltransferase 1	487715
59	MFSD8	major facilitator superfamily domain containing 8	476086
60	GLS	glutaminase	488448
61	LOC482938	zinc finger protein 705A	482938
62	NRF1	nuclear respiratory factor 1	482260
63	NSD3	nuclear receptor binding SET domain protein 3	475584
64	RPE	ribulose-5-phosphate-3-epimerase	478893
65	NEMP2	nuclear envelope integral membrane protein 2	607176
66	PPP6R3	protein phosphatase 6 regulatory subunit 3	483688
67	UBE3C	ubiquitin protein ligase E3C	482822
68	STRN3	striatin 3	480282
69	SLC35F5	solute carrier family 35 member F5	476123
70	WDR55	WD repeat domain 55	478033
71	CCNG1	cyclin G1	479303
72	VPS45	vacuolar protein sorting 45 homolog	475833
73	UBR2	ubiquitin protein ligase E3 component n-recognin 2	474903
74	GON4L	gon-4 like	490422
75	PPP2R5C	protein phosphatase 2 regulatory subunit B'gamma	480436
76	SLC39A10	solute carrier family 39 member 10	478850
77	HNRNPUL2	heterogeneous nuclear ribonucleoprotein U like 2	476053
78	CDKN2AIP	CDKN2A interacting protein	607991
79	UGGT1	UDP-glucose glycoprotein glucosyltransferase 1	476101
80	RNF141	ring finger protein 141	476852
81	MUS81	MUS81 structure-specific endonuclease subunit	476021
82	ZNF333	zinc finger protein 333	484899
83	MTRR	5-methyltetrahydrofolate-homocysteine methyltransferase reductase	478623
84	LOC476309	heterogeneous nuclear ribonucleoprotein K pseudogene	476309
85	PIK3C3	phosphatidylinositol 3-kinase catalytic subunit type 3	490477
86	ZNF274	zinc finger protein 274	476367
87	ZFP3	ZFP3 zinc finger protein	489452
88	ARHGAP12	Rho GTPase activating protein 12	487088
89	NFX1	nuclear transcription factor: X-box binding 1	481581
90	TIA1	TIA1 cytotoxic granule associated RNA binding protein	610625
91	C28H10orf76	chromosome 28 C10orf76 homolog	486853
92	CNOT9	CCR4-NOT transcription complex subunit 9	610449
93	CCDC186	coiled-coil domain containing 186	477825
94	COQ9	coenzyme Q9	478110
95	FAM160A2	family with sequence similarity 160 member A2	485332
96	DCTD	dCMP deaminase	607328
97	BROX	BRO1 domain and CAAX motif containing	478996
98	GALK2	galactokinase 2	487548
99	SERAC1	serine active site containing 1	476255
100	RAPGEF6	Rap guanine nucleotide exchange factor 6	609521
101	RBM5	RNA binding motif protein 5	476618
102	ZFYVE16	zinc finger FYVE-type containing 16	479167
103	ATP6V0A2	ATPase H+ transporting V0 subunit a2	486245
104	TCTN3	tectonic family member 3	608523
105	POLK	DNA polymerase kappa	479180
106	BTBD7	BTB domain containing 7	490834
107	TRAPPC11	trafficking protein particle complex 11	482914
108	RMDN1	regulator of microtubule dynamics 1	477931
109	SCYL3	SCY1 like pseudokinase 3	480077
110	MTFR1L	mitochondrial fission regulator 1 like	487365
111	TDP1	tyrosyl-DNA phosphodiesterase 1	490828
112	TTC14	tetratricopeptide repeat domain 14	478641
113	CDC73	cell division cycle 73	478955
114	SESTD1	SEC14 and spectrin domain containing 1	478823
115	ARPC2	actin related protein 2/3 complex subunit 2	478907
116	HEATR3	HEAT repeat containing 3	478132
117	HERPUD1	homocysteine inducible ER protein with ubiquitin like domain 1	478116
118	MRPL17	mitochondrial ribosomal protein L17	610200
119	GTPBP8	GTP binding protein 8 (putative)	607600
120	SPG11	spastic paraplegia 11 (autosomal recessive)	487533
121	TCAIM	T cell activation inhibitor: mitochondrial	485567
122	ADSS	adenylosuccinate synthase	480098
123	LATS1	large tumor suppressor kinase 1	476241
124	NLN	neurolysin	478081
125	TRPM7	transient receptor potential cation channel subfamily M member 7	478300
126	VPS36	vacuolar protein sorting 36 homolog	477292
127	RALGPS2	Ral GEF with PH domain and SH3 binding motif 2	480054
128	NOC3L	NOC3 like DNA replication regulator	100856584
129	ANAPC5	anaphase promoting complex subunit 5	477471
130	NADSYN1	NAD synthetase 1	483674
131	KBTBD4	kelch repeat and BTB domain containing 4	483621
132	KLC1	kinesin light chain 1	100855591
133	VPS33A	VPS33A: CORVET/HOPS core subunit	477462
134	CD47	CD47 molecule	478552
135	IPO7	importin 7	485383
136	DPP8	dipeptidyl peptidase 8	487605
137	DIP2B	disco interacting protein 2 homolog B	477608
138	GTF3C3	general transcription factor IIIC subunit 3	478851
139	AP3S2	adaptor related protein complex 3 sigma 2 subunit	479042
140	TRDMT1	tRNA aspartic acid methyltransferase 1	487116
141	THOC2	THO complex 2	481042
142	KANSL1L	KAT8 regulatory NSL complex subunit 1 like	478894
143	LOC102157317	uncharacterized LOC102157317	102157317
144	2021-03-07	membrane associated ring-CH-type finger 7	478763
145	KAT5	lysine acetyltransferase 5	483728
146	SPOPL	speckle type BTB/POZ protein like	476134
147	ETAA1	ETAA1: ATR kinase activator	474621
148	PLEKHB2	pleckstrin homology domain containing B2	483858
149	SRSF4	serine and arginine rich splicing factor 4	478160
150	STK17B	serine/threonine kinase 17b	488453
151	DCAF17	DDB1 and CUL4 associated factor 17	609326
152	CHD9	chromodomain helicase DNA binding protein 9	478128
153	PTDSS1	phosphatidylserine synthase 1	611965
154	TMEM237	transmembrane protein 237	488476
155	RPUSD3	RNA pseudouridylate synthase domain containing 3	484663
156	TNKS2	tankyrase 2	100855568
157	IPO11	importin 11	478073
158	EIF2A	eukaryotic translation initiation factor 2A	477112
159	TRIP11	thyroid hormone receptor interactor 11	480228
160	DDB1	damage specific DNA binding protein 1	476067
161	ZMYM1	zinc finger MYM-type containing 1	608768
162	LARP1B	La ribonucleoprotein domain family member 1B	476085
163	NEPRO	nucleolus and neural progenitor protein	607614
164	METAP1D	methionyl aminopeptidase type 1D: mitochondrial	488399
165	TCERG1	transcription elongation regulator 1	478052
166	ZNF280C	zinc finger protein 280C	481049
167	COG5	component of oligomeric golgi complex 5	483265
168	FUBP1	far upstream element binding protein 1	100855608
169	FTO	FTO: alpha-ketoglutarate dependent dioxygenase	478125
170	RGP1	RGP1 homolog: RAB6A GEF complex partner 1	100684169
171	DHX16	DEAH-box helicase 16	481706
172	PARG	poly(ADP-ribose) glycohydrolase	477749
173	MDM4	MDM4: p53 regulator	478939
174	TANK	TRAF family member associated NFKB activator	608092
175	ARFGAP2	ADP ribosylation factor GTPase activating protein 2	483627
176	MAP4K4	mitogen-activated protein kinase kinase kinase kinase 4	481331
177	TMEM161B	transmembrane protein 161B	488916
178	DDX5	DEAD-box helicase 5	480472
179	IDH1	isocitrate dehydrogenase (NADP(+)) 1: cytosolic	478889
180	UPF2	UPF2: regulator of nonsense mediated mRNA decay	487130
181	PRIMPOL	primase and DNA directed polymerase	475632
182	VHL	von Hippel-Lindau tumor suppressor	494000
183	DFFA	DNA fragmentation factor subunit alpha	487449
184	KLHDC2	kelch domain containing 2	480314
185	RPAP3	RNA polymerase II associated protein 3	477631
186	TTLL4	tubulin tyrosine ligase like 4	488525
187	B3GALNT2	beta-1:3-N-acetylgalactosaminyltransferase 2	479196
188	NSUN3	NOP2/Sun RNA methyltransferase family member 3	607320
189	ARID4B	AT-rich interaction domain 4B	488959
190	FAM151B	family with sequence similarity 151 member B	479166
191	GNL3L	G protein nucleolar 3 like	480933
192	SGO2	shugoshin 2	478863
193	RNF216	ring finger protein 216	479760
194	ITSN2	intersectin 2	475683
195	ZCCHC7	zinc finger CCHC-type containing 7	481611
196	LOC111098322	serine/arginine repetitive matrix protein 1-like	111098322
197	LOC111093268	uncharacterized LOC111093268	111093268
198	PIGG	phosphatidylinositol glycan anchor biosynthesis class G	479136
199	KLHL42	kelch like family member 42	477659
200	FARSB	phenylalanyl-tRNA synthetase beta subunit	478926
201	CSDE1	cold shock domain containing E1	475807
202	ANKRD44	ankyrin repeat domain 44	478852
203	BRAF	B-Raf proto-oncogene: serine/threonine kinase	475526
204	FAM208A	family with sequence similarity 208 member A	476580
205	LOC483164	histone H2B type 2-F	483164
206	WDR37	WD repeat domain 37	607652
207	DHDDS	dehydrodolichyl diphosphate synthase subunit	612157
208	ARFIP1	ADP ribosylation factor interacting protein 1	475467
209	VPS8	VPS8: CORVET complex subunit	478658
210	EIF3A	eukaryotic translation initiation factor 3 subunit A	486914
211	CLIP1	CAP-Gly domain containing linker protein 1	477461
212	SLC30A7	solute carrier family 30 member 7	479924
213	NABP1	nucleic acid binding protein 1	478847
214	LRRC28	leucine rich repeat containing 28	479023
215	AP3B1	adaptor related protein complex 3 beta 1 subunit	403459
216	DDX50	DExD-box helicase 50	612801
217	SCYL2	SCY1 like pseudokinase 2	482622
218	ZNF143	zinc finger protein 143	485384
219	LMAN2	lectin: mannose binding 2	403938
220	TPK1	thiamin pyrophosphokinase 1	475515
221	C2CD6	C2 calcium dependent domain containing 6	609039
222	ARRDC3	arrestin domain containing 3	488912
223	CLPB	ClpB homolog: mitochondrial AAA ATPase chaperonin	476815
224	PRRC2C	proline rich coiled-coil 2C	480075
225	TARBP1	TAR (HIV-1) RNA binding protein 1	479200
226	RPP30	ribonuclease P/MRP subunit p30	477763
227	ZMYND11	zinc finger MYND-type containing 11	478023
228	TRAPPC8	trafficking protein particle complex 8	480166
229	WRN	Werner syndrome RecQ like helicase	493997
230	MTPAP	mitochondrial poly(A) polymerase	477963
231	ERCC3	ERCC excision repair 3: TFIIH core complex helicase subunit	476105
232	DNAJC24	DnaJ heat shock protein family (Hsp40) member C24	100684006
233	UBR1	ubiquitin protein ligase E3 component n-recognin 1	487521
234	SLC25A12	solute carrier family 25 member 12	478798
235	DET1	DET1: COP1 ubiquitin ligase partner	479036
236	LOC102156733	uncharacterized LOC102156733	102156733
237	SPATA1	spermatogenesis associated 1	612554
238	MAEA	macrophage erythroblast attacher	610745
239	TOMM70	translocase of outer mitochondrial membrane 70	478541
240	C8H14orf28	chromosome 8 C14orf28 homolog	612939
241	EXOC6B	exocyst complex component 6B	483119
242	ALKBH3	alkB homolog 3: alpha-ketoglutaratedependent dioxygenase	475938
243	BBX	BBX: HMG-box containing	478551
244	ZFAND1	zinc finger AN1-type containing 1	487018
245	MICAL3	microtubule associated monooxygenase: calponin and LIM domain containing 3	486761
246	RNF20	ring finger protein 20	474788
247	BCL2L13	BCL2 like 13	477742
248	MRPL3	mitochondrial ribosomal protein L3	100856435
249	ZNF280D	zinc finger protein 280D	478315
250	EEF2K	eukaryotic elongation factor 2 kinase	479812
251	MAP3K5	mitogen-activated protein kinase kinase kinase 5	476215
252	YTHDC2	YTH domain containing 2	474641
253	NUBPL	nucleotide binding protein like	609340
254	RCHY1	ring finger and CHY zinc finger domain containing 1	612746
255	PNISR	PNN interacting serine and arginine rich protein	475005
256	BTAF1	BTAF1 RNA polymerase II: B-TFIID transcription factor-associated: 170kDa (Mot1 homolog: S. cerevisiae)	486800
257	LZIC	leucine zipper and CTNNBIP1 domain containing	100855658
258	WDR75	WD repeat domain 75	488443
259	GSS	glutathione synthetase	442962
260	COG3	component of oligomeric golgi complex 3	485455
261	NUCKS1	nuclear casein kinase and cyclin dependent kinase substrate 1	478944
262	DYNC2H1	dynein cytoplasmic 2 heavy chain 1	479461
263	ATR	ATR serine/threonine kinase	100856315
264	CFAP97	cilia and flagella associated protein 97	100685778
265	RAD50	RAD50 double strand break repair protein	474674
266	ATF6B	activating transcription factor 6 beta	474855
267	MPHOSPH9	M-phase phosphoprotein 9	477453
268	MSH3	mutS homolog 3	479164
269	GTF2E2	general transcription factor IIE subunit 2	100855770
270	TIAL1	TIA1 cytotoxic granule associated RNA binding protein like 1	477841
271	KLHL20	kelch like family member 20	480067
272	EPRS	glutamyl-prolyl-tRNA synthetase	478962
273	DCAF4	DDB1 and CUL4 associated factor 4	490767
274	EEF1A1	eukaryotic translation elongation factor 1 alpha 1	403506
275	SETD6	SET domain containing 6	487253
276	CCNYL1	cyclin Y like 1	488492
277	HELB	DNA helicase B	608595
278	VEZT	vezatin: adherens junctions transmembrane protein	111090044
279	CRADD	CASP2 and RIPK1 domain containing adaptor with death domain	482604
280	TRMO	tRNA methyltransferase O	474773
281	COX15	COX15: cytochrome c oxidase assembly homolog	477792
282	NUP93	nucleoporin 93	478119
283	ELP1	elongator complex protein 1	612455
284	PEX2	peroxisomal biogenesis factor 2	487007
285	TBCE	tubulin folding cofactor E	479197
286	ZDHHC18	zinc finger DHHC-type containing 18	478172
287	HELQ	helicase: POLQ like	487837
288	IPO4	importin 4	480260
289	MRPL44	mitochondrial ribosomal protein L44	100855653
290	NUP98	nucleoporin 98	476822
291	FAM13B	family with sequence similarity 13: member B	474690
292	PCM1	pericentriolar material 1	475618
293	TASP1	taspase 1	477152
294	MCTS1	MCTS1: re-initiation and release factor	481038
295	SCAPER	S-phase cyclin A associated protein in the ER	478373
296	LOC475149	exocyst complex component 1	475149
297	CCDC125	coiled-coil domain containing 125	487239
298	FDXACB1	ferredoxin-fold anticodon binding domain containing 1	489408
299	GIT2	GIT ArfGAP 2	477520
300	GSAP	gamma-secretase activating protein	475903

## Sheet: a.9
Rank	Gene	Function	Gene ID
1	TAF9	chromatin modification protein	855276
2	GET3	guanine nucleotide exchange factor GET3	851458
3	ERG27	3-keto-steroid reductase	850790
4		oxidoreductase	855266
5	CKB1	casein kinase 2 regulatory subunit CKB1	852865
6	TAE1	N-terminal protein methyltransferase	852564
7	NIT3	putative hydrolase	851065
8		hypothetical protein	851411
9	RAM2	bifunctional protein farnesyltransferase/protein geranylgeranyltransferase	853849
10	CPR5	peptidylprolyl isomerase family protein CPR5	851898
11	SEH1	Seh1p	852778
12	NAP1	histone chaperone NAP1	853922
13	BOL2	Bol2p	852652
14		glucose-6-phosphate 1-epimerase	855125
15	VMA4	H(+)-transporting V1 sector ATPase subunit E	854509
16	ERG8	phosphomevalonate kinase	855260
17	PRO2	glutamate-5-semialdehyde dehydrogenase	854501
18	VPS60	Vps60p	852097
19	FAU1	5-formyltetrahydrofolate cyclo-ligase	856932
20	ARC1	Arc1p	852773
21	GCG1	gamma-glutamylcyclotransferase	856910
22	HIS6	1-(5-phosphoribosyl)-5- ((5-phosphoribosylamino)methylideneamino)imidazole-4-carboxamide isomerase HIS6	854792
23		carboxymethylenebutenolidase	851472
24	BUD32	serine/threonine protein kinase BUD32	853178
25	KIN28	TFIIH complex serine/threonine-protein kinase subunit KIN28	851450
26	HPA3	D-amino-acid N-acetyltransferase	856642
27	YIH1	Yih1p	850423
28	CDC36	CCR4-NOT core subunit CDC36	851389
29	DST1	Dst1p	852839
30	HOM6	homoserine dehydrogenase	853604
31	GVP36	Gvp36p	854770
32	PMU1	putative phosphomutase	853730
33	CEG1	mRNA guanylyltransferase	852747
34	ERG20	bifunctional (2E:6E)-farnesyl diphosphate synthase/dimethylallyltranstransferase	853272
35	CUE1	Cue1p	855306
36	MPD2	protein disulfide isomerase MPD2	854065
37	FPR3	peptidylprolyl isomerase FPR3	854901
38	NPY1	NAD(+) diphosphatase	852813
39	RFC3	replication factor C subunit 3	855426
40	MTQ2	S-adenosylmethionine-dependent methyltransferase	851718
41	PRO3	pyrroline-5-carboxylate reductase	856744
42	MLC1	Mlc1p	852772
43	VPS75	Vps75p	855475
44	ANT1	Ant1p	856246
45	SKP1	SCF ubiquitin ligase subunit SKP1	851928
46	SHB17	sedoheptulose-bisphosphatase	853917
47	SGT2	Sgt2p	854168
48	CIA1	iron-sulfur cluster assembly protein CIA1	851860
49	ERG10	acetyl-CoA C-acetyltransferase	856079
50	GRX3	monothiol glutaredoxin GRX3	851672
51	TPM1	tropomyosin TPM1	855645
52	FSH3	putative serine hydrolase	854454
53	PML1	Pml1p	850703
54	GUS1	glutamate--tRNA ligase GUS1	852606
55	AGE2	Age2p	854767
56	CCS1	copper chaperone CCS1	855054
57	HCR1	translation initiation factor eIF3 core subunit j	850889
58	ARC15	Arc15p	854748
59	HIS2	histidinol-phosphatase	850581
60	VPS29	retromer subunit VPS29	856403
61	PHO85	cyclin-dependent serine/threonine-protein kinase PHO85	856076
62	RPB11	DNA-directed RNA polymerase II core subunit RPB11	854157
63	CAJ1	Caj1p	856772
64	DAK1	dihydroxyacetone kinase	854932
65	PRP4	U4/U6-U5 snRNP complex subunit PRP4	856307
66	CSL4	exosome non-catalytic core subunit CSL4	855489
67	NBP35	Fe-S cluster-binding ATPase	852789
68	TRM9	tRNA (carboxymethyluridine(34)-5-O)-methyltransferase	854994
69	GLR1	glutathione-disulfide reductase GLR1	856014
70	RPE1	ribulose-phosphate 3-epimerase RPE1	853322
71	ADD66	Add66p	853629
72	ESS1	peptidylprolyl isomerase ESS1	853475
73	PHO13	4-nitrophenylphosphatase	851362
74		hypothetical protein	852342
75	EFM5	protein-lysine N-methyltransferase	852884
76	ERP1	Erp1p	851264
77	DPB4	DNA polymerase epsilon noncatalytic subunit	851699
78	DDP1	polyphosphatase DDP1	854334
79	TAF10	Taf10p	851745
80	PBP1	Pbp1p	853089
81	VMA13	H(+)-transporting V1 sector ATPase subunit H	856148
82	PBA1	Pba1p	850896
83	LTP1	tyrosine protein phosphatase LTP1	856187
84	IRC25	Irc25p	850708
85	THR1	homoserine kinase	856420
86	MXR2	Mxr2p	850324
87	FMP41	Fmp41p	855553
88	YUH1	ubiquitin-specific protease YUH1	853562
89	CWC25	U2-type spliceosomal complex subunit CWC25	855476
90	ERV1	flavin-linked sulfhydryl oxidase	852916
91	CCT2	chaperonin-containing T-complex subunit CCT2	854664
92	AOS1	E1 ubiquitin-activating protein AOS1	856310
93	HAM1	nucleoside triphosphate pyrophosphohydrolase HAM1	853532
94	IPP1	inorganic diphosphatase IPP1	852296
95	ERV25	Erv25p	854997
96	PDA1	pyruvate dehydrogenase (acetyl-transferring) subunit E1 alpha	856925
97	COQ4	ubiquinone biosynthesis protein COQ4	851785
98	CCT4	chaperonin-containing T-complex subunit CCT4	851412
99	ENV9	Env9p	854420
100	RIB3	3:4-dihydroxy-2-butanone-4-phosphate synthase RIB3	852098
101	GSH2	glutathione synthase	854108
102	RPT6	proteasome regulatory particle base subunit RPT6	852834
103	NAT3	peptide alpha-N-acetyltransferase complex B subunit NAT3	856249
104	EMP24	Emp24p	852675
105	IES2	Ies2p	855506
106	TAL1	sedoheptulose-7-phosphate:D-glyceraldehyde-3-phosphate transaldolase TAL1	851068
107	CDC50	aminophospholipid translocase regulatory protein CDC50	850456
108	DUT1	bifunctional dITP/dUTP diphosphatase	852554
109	GUK1	guanylate kinase	852065
110	DCC1	Dcc1p	850344
111	TMA22	Tma22p	853471
112	PPX1	exopolyphosphatase	856608
113		hypothetical protein	850739
114	XPT1	xanthine phosphoribosyltransferase	853597
115	URA6	bifunctional uridylate/adenylate kinase	853844
116	ASN2	asparagine synthase (glutamine-hydrolyzing) 2	853025
117	UBA4	Uba4p	856511
118	FPR1	peptidylprolyl isomerase FPR1	855587
119	MDE1	methylthioribulose 1-phosphate dehydratase MDE1	853481
120	SRP1	karyopherin alpha	855532
121	PST2	flavodoxin-like fold family protein	851596
122	RKM5	S-adenosylmethionine-dependent methyltransferase	850828
123	CAK1	cyclin-dependent protein kinase-activating kinase CAK1	850515
124	TAF4	Taf4p	855017
125	CAB4	putative pantetheine-phosphate adenylyltransferase	853194
126	CCT8	chaperonin-containing T-complex subunit CCT8	853447
127	MEU1	S-methyl-5-thioadenosine phosphorylase	850704
128	REH1	Reh1p	851103
129	ARP4	Arp4p	853364
130	FOL3	dihydrofolate synthase	855140
131	GON7	chromatin DNA-binding EKC/KEOPS complex subunit GON7	853255
132		S-formylglutathione hydrolase	853377
133	PRP31	U4/U6-U5 snRNP complex subunit PRP31	852983
134	SRB5	Srb5p	852996
135	TED1	Ted1p	854772
136	SUA7	transcription factor TFIIB	856201
137	WWM1	Wwm1p	850538
138	KAE1	tRNA N6-adenosine threonylcarbamoyltransferase	853910
139	KXD1	Kxd1p	852801
140		putative alanine--tRNA ligase	855688
141	APS3	Aps3p	853429
142	DPH5	diphthine synthase	850869
143	ADH6	NADP-dependent alcohol dehydrogenase	855368
144	MGR2	Mgr2p	856006
145	YCP4	flavodoxin-like fold family protein	850360
146	PRE6	proteasome core particle subunit alpha 4	854119
147	SAM35	SAM complex subunit SAM35	856483
148	TRM10	tRNA (guanine(9)-N(1))-methyltransferase	854060
149	SCJ1	Scj1p	855254
150		hypothetical protein	853546
151	MDH3	malate dehydrogenase MDH3	851481
152	LPD1	dihydrolipoyl dehydrogenase	850527
153	YPT1	Rab family GTPase YPT1	850505
154	SMX3	mRNA splicing protein SMX3	856312
155	TUB3	alpha-tubulin TUB3	854915
156	RNA1	GTPase-activating protein RNA1	855275
157	POF1	nicotinamide-nucleotide adenylyltransferase	850310
158	DAL3	ureidoglycolate hydrolase	854850
159		hypothetical protein	854896
160	DUG1	metallodipeptidase	850605
161	PDX3	pyridoxamine-phosphate oxidase PDX3	852323
162	YKE2	tubulin-binding prefolding complex subunit YKE2	850897
163	TAD3	Tad3p	851027
164	HOT13	Hot13p	853778
165	MED4	Med4p	854345
166	DOT5	thioredoxin peroxidase DOT5	854805
167	IRC21	Irc21p	855095
168		putative hydrolase	853833
169		hypothetical protein	855615
170	PEX14	Pex14p	852724
171	SBA1	Hsp90 cochaperone SBA1	853743
172	OSH7	oxysterol-binding protein related protein OSH7	856389
173	RVS167	amphiphysin	851996
174	TFA2	transcription factor TFIIE subunit TFA2	853936
175	HSM3	Hsm3p	852575
176	ARO2	bifunctional chorismate synthase/riboflavin reductase [NAD(P)H] ARO2	852729
177		hypothetical protein	855341
178	NPA3	GTPase NPA3	853535
179	LOT5	Lot5p	853652
180	CCT3	chaperonin-containing T-complex subunit CCT3	853438
181		hypothetical protein	850418
182	SFB2	COPII subunit SFB2	855678
183	CCT6	chaperonin-containing T-complex subunit CCT6	851768
184	MOG1	Ran GTPase-binding protein MOG1	853537
185	GCN20	putative AAA family ATPase GCN20	850561
186	LNP1	Lnp1p	856599
187	FAP7	nucleoside-triphosphatase	851388
188	PSH1	ubiquitin-protein ligase PSH1	854102
189		hypothetical protein	855902
190	CDC10	septin CDC10	850358
191	APL6	Apl6p	853177
192	NMT1	glycylpeptide N-tetradecanoyltransferase NMT1	850892
193		L-methionine (R)-S-oxide reductase	853794
194	CCT5	chaperonin-containing T-complex subunit CCT5	853527
195	PRE9	proteasome core particle subunit alpha 3	853036
196		hypothetical protein	853182
197	CAF20	Caf20p	854450
198	HCH1	Hch1p	855440
199	TUM1	thiosulfate sulfurtransferase	854425
200	YPR1	trifunctional aldehyde reductase/carbonyl reductase (NADPH)/glucose 1-dehydrogenase (NADP(+)) YPR1	851974
201	PEX25	Pex25p	855991
202	SEC26	coatomer subunit beta	851824
203	SPE3	spermidine synthase	856182
204	DPS1	aspartate--tRNA ligase DPS1	850643
205	CMD1	calmodulin	852406
206	FUM1	fumarase FUM1	855866
207	LSB5	Lsb5p	850323
208	CPR3	peptidylprolyl isomerase CPR3	854897
209	ABD1	mRNA (guanine-N7)-methyltransferase	852538
210		palmitoyl-(protein) hydrolase	850809
211	CDC43	protein geranylgeranyltransferase type I subunit CDC43	852722
212	MEC3	Mec3p	850995
213	RNQ1	prion domain-containing protein RNQ1	850329
214	IMP1	endopeptidase catalytic subunit IMP1	855182
215	CTF8	Ctf8p	856598
216	SUB2	ATP-dependent RNA helicase SUB2	851475
217	NUP85	Nup85p	853499
218	SCS2	phosphatidylinositol-binding protein SCS2	856856
219	AAT2	aspartate transaminase AAT2	850714
220	YRA2	Yra2p	853666
221	CAB1	pantothenate kinase	852144
222	RPN10	proteasome regulatory particle base subunit RPN10	856607
223	MAK32	Mak32p	850381
224	DCN1	NEDD8 ligase DCN1	850819
225	EMC2	Emc2p	853550
226		hypothetical protein	853944
227	VPS1	dynamin-like GTPase VPS1	853870
228	POR1	porin POR1	855669
229	TRP2	anthranilate synthase TRP2	856824
230	NTG2	bifunctional N-glycosylase/AP lyase NTG2	854114
231	ADE8	phosphoribosylglycinamide formyltransferase	852017
232	RAX1	Rax1p	854477
233	CWC21	U2-type spliceosomal complex subunit CWC21	852093
234	SFA1	bifunctional alcohol dehydrogenase/S-(hydroxymethyl)glutathione dehydrogenase	851386
235	CNE1	calnexin	851241
236	RPB4	DNA-directed RNA polymerase II subunit RPB4	853301
237	SEC11	signal peptidase complex catalytic subunit SEC11	854840
238	TCP1	chaperonin-containing T-complex alpha subunit TCP1	851798
239	RFC2	replication factor C subunit 2	853531
240	ARC35	Arc35p	855771
241	COG2	Golgi transport complex subunit COG2	853017
242	HRI1	Hri1p	851008
243	PTC1	type 2C protein phosphatase PTC1	851558
244	PUP2	proteasome core particle subunit alpha 5	853168
245		hypothetical protein	853008
246	SEC4	Rab family GTPase SEC4	850543
247	YIP4	Yip4p	852676
248	SEC13	GTPase-activating protein SEC13	850905
249	STE50	Ste50p	850325
250	ERV46	Erv46p	851256
251	LST8	TOR complex subunit LST8	855726
252	SWD3	Swd3p	852472
253	TAN1	putative tRNA acetyltransferase	852619
254	GTR2	Gtr2p	853072
255	BET3	TRAPP complex core subunit BET3	853942
256	DCR2	phosphoprotein phosphatase	851075
257	PKR1	Pkr1p	855153
258	PNP1	purine-nucleoside phosphorylase	850906
259	GRX7	glutathione-disulfide reductase GRX7	852302
260	RIB2	bifunctional DRAP deaminase/tRNA pseudouridine synthase RIB2	854088
261	ADO1	adenosine kinase	853569
262		hypothetical protein	853607
263		putative methyltransferase	855042
264	HNT1	adenosine 5'-monophosphoramidase	851432
265	LSC2	succinate--CoA ligase (GDP-forming) subunit beta	853159
266		gluconokinase	851835
267	OTU1	ubiquitin-specific protease OTU1	850500
268	GLE1	nucleoporin GLE1	851320
269	PRC1	carboxypeptidase C PRC1	855343
270	USA1	Usa1p	854979
271	CIA2	iron-sulfur cluster assembly protein CIA2	856522
272	GLO1	lactoylglutathione lyase GLO1	855009
273	CAC2	Cac2p	854869
274	RVS161	amphiphysin-like protein RVS161	850367
275	NSE1	Smc5-Smc6 complex subunit NSE1	850693
276	HEM4	uroporphyrinogen-III synthase HEM4	854452
277	YSA1	ADP-ribose diphosphatase	852408
278	PCM1	phosphoacetylglucosamine mutase PCM1	856652
279	DPM1	dolichyl-phosphate beta-D-mannosyltransferase	856313
280	PPG1	putative serine/threonine-protein kinase PPG1	855766
281	LSB1	Lsb1p	853037
282	MCY1	putative cysteine synthase	852895
283	APM4	Apm4p	854092
284	VMA11	H(+)-transporting V0 sector ATPase subunit c'	855842
285	RBL2	Rbl2p	854439
286		putative cystathionine beta-lyase	856512
287	SEC22	SNAP receptor SEC22	850973
288	DID4	ESCRT-III subunit protein DID4	853868
289	BET2	Rab geranylgeranyltransferase BET2	856306
290	ARH1	NADPH-adrenodoxin reductase	851982
291	GRX5	monothiol glutaredoxin GRX5	856048
292	TIF35	translation initiation factor eIF3 core subunit g	852039
293	HOG1	mitogen-activated protein kinase HOG1	850803
294	ARC19	Arc19p	853856
295	STB5	Stb5p	856583
296	GIM5	Gim5p	854879
297	ERG2	C-8 sterol isomerase ERG2	855242
298	TAF13	Taf13p	854875
299	IKI1	Elongator subunit IKI1	856594
300	BNA7	arylformamidase	852038

[truncated: 21 more sheets: a.10, b.1, b.2, b.3, b.4, b.5, b.6, b.7, b.8, b.9, b.10, c.1, c.2, c.3, c.4, c.5, c.6, c.7, c.8, c.9 …]
